# Supplementary material for: Biomarkers in a socially exchanged fluid reflect colony maturity, behavior, and distributed metabolism
Source: eLife journal article supplement (doi:10.7554/elife.74005), 2021-11-01
Supplement: fig2-data1 [file elife-74005-fig2-data1-v2.pdf]

Figure 2 - source data 1: Coefficient of variation by sample type

Post-hoc comparisons of gamma GLM on coefficient of variation by sample type.

| <b>Comparison</b> | <b>Estimate</b> | <b>Std. Error</b> | <b>z value</b> | <b>Pr(&gt; z )</b> |    |
|-------------------|-----------------|-------------------|----------------|--------------------|----|
| ReplicaN-ReplicaL | 0.195257        | 0.036215          | 5.392          | <0.001             |    |
| Mature-ReplicaL   | 0.787579        | 0.035195          | 22.377         | <0.001             |    |
| Young-ReplicaL    | 0.729474        | 0.035060          | 20.807         | <0.001             |    |
| Lab2020-ReplicaL  | 0.363673        | 0.036394          | 9.993          | <0.001             |    |
| Lab2019-ReplicaL  | 0.197683        | 0.038955          | 5.075          | <0.001             |    |
| Nurse-ReplicaL    | 0.499185        | 0.035416          | 14.095         | <0.001             |    |
| Forager-ReplicaL  | 0.437798        | 0.037355          | 11.720         | <0.001             |    |
| Mature-ReplicaN   | 0.592322        | 0.033084          | 17.904         | <0.001             |    |
| Young-ReplicaN    | 0.534217        | 0.032939          | 16.218         | <0.001             |    |
| Lab2020-ReplicaN  | 0.168416        | 0.034356          | 4.902          | <0.001             |    |
| Lab2019-ReplicaN  | 0.002426        | 0.037059          | 0.065          | 1.00000            | NS |
| Nurse-ReplicaN    | 0.303928        | 0.033319          | 9.122          | <0.001             |    |
| Forager-ReplicaN  | 0.242541        | 0.035372          | 6.857          | <0.001             |    |
| Young-Mature      | -0.058105       | 0.031815          | -1.826         | 0.60026            | NS |
| Lab2020-Mature    | -0.423906       | 0.033279          | -12.738        | <0.001             |    |
| Lab2019-Mature    | -0.589896       | 0.036063          | -16.357        | <0.001             |    |
| Nurse-Mature      | -0.288394       | 0.032208          | -8.954         | <0.001             |    |
| Forager-Mature    | -0.349781       | 0.034328          | -10.189        | <0.001             |    |
| Lab2020-Young     | -0.365801       | 0.033136          | -11.039        | <0.001             |    |
| Lab2019-Young     | -0.531791       | 0.035931          | -14.800        | <0.001             |    |
| Nurse-Young       | -0.230289       | 0.032059          | -7.183         | <0.001             |    |
| Forager-Young     | -0.291676       | 0.034189          | -8.531         | <0.001             |    |
| Lab2019-Lab2020   | -0.165989       | 0.037233          | -4.458         | <0.001             |    |
| Nurse-Lab2020     | 0.135513        | 0.033513          | 4.044          | 0.00131            |    |
| Forager-Lab2020   | 0.074125        | 0.035555          | 2.085          | 0.42312            | NS |
| Nurse-Lab2019     | 0.301502        | 0.036279          | 8.311          | <0.001             |    |
| Forager-Lab2019   | 0.240115        | 0.038173          | 6.290          | <0.001             |    |
| Forager-Nurse     | -0.061387       | 0.034554          | -1.777         | 0.63467            | NS |
