# Supplementary material for: Biomarkers in a socially exchanged fluid reflect colony maturity, behavior, and distributed metabolism
Source: eLife journal article supplement (doi:10.7554/elife.74005), 2021-11-01
Supplement: fig2-data2 [file elife-74005-fig2-data2-v2.pdf]

Figure 2 - source data 2: Protein number by sample type

Post-hoc comparisons of negative binomial GLM on protein number explained by sample type.

| <b>Comparison</b> | <b>Estimate</b> | <b>Std. Error</b> | <b>z value</b> | <b>Pr(&gt; z )</b> |    |
|-------------------|-----------------|-------------------|----------------|--------------------|----|
| Lab18mon-Forager  | 0.311827        | 0.143990          | 2.166          | 0.3534             | NS |
| Lab6mon-Forager   | 0.124075        | 0.088708          | 1.399          | 0.8477             | NS |
| MatL-Forager      | 0.253416        | 0.122606          | 2.067          | 0.4167             | NS |
| MatN-Forager      | 0.530447        | 0.121930          | 4.350          | <0.01              |    |
| Mature-Forager    | 0.341734        | 0.080648          | 4.237          | <0.01              |    |
| Nurse-Forager     | 0.309891        | 0.083418          | 3.715          | <0.01              |    |
| Young-Forager     | 0.349596        | 0.083373          | 4.193          | <0.01              |    |
| Lab6mon-Lab18mon  | -0.187752       | 0.146878          | -1.278         | 0.8993             | NS |
| MatL-Lab18mon     | -0.058411       | 0.169518          | -0.345         | 1.0000             | NS |
| MatN-Lab18mon     | 0.218620        | 0.169030          | 1.293          | 0.8935             | NS |
| Mature-Lab18mon   | 0.029907        | 0.142156          | 0.210          | 1.0000             | NS |
| Nurse-Lab18mon    | -0.001936       | 0.143745          | -0.013         | 1.0000             | NS |
| Young-Lab18mon    | 0.037769        | 0.143719          | 0.263          | 1.0000             | NS |
| MatL-Lab6mon      | 0.129341        | 0.125986          | 1.027          | 0.9676             | NS |
| MatN-Lab6mon      | 0.406372        | 0.125328          | 3.242          | 0.0237             |    |
| Mature-Lab6mon    | 0.217660        | 0.085698          | 2.540          | 0.1660             | NS |
| Nurse-Lab6mon     | 0.185816        | 0.088310          | 2.104          | 0.3921             | NS |
| Young-Lab6mon     | 0.225521        | 0.088267          | 2.555          | 0.1603             | NS |
| MatN-MatL         | 0.277031        | 0.151229          | 1.832          | 0.5791             | NS |
| Mature-MatL       | 0.088318        | 0.120447          | 0.733          | 0.9956             | NS |
| Nurse-MatL        | 0.056475        | 0.122319          | 0.462          | 0.9998             | NS |
| Young-MatL        | 0.096180        | 0.122288          | 0.787          | 0.9932             | NS |
| Mature-MatN       | -0.188713       | 0.119758          | -1.576         | 0.7498             | NS |
| Nurse-MatN        | -0.220556       | 0.121641          | -1.813         | 0.5918             | NS |
| Young-MatN        | -0.180851       | 0.121610          | -1.487         | 0.8017             | NS |
| Nurse-Mature      | -0.031843       | 0.080210          | -0.397         | 0.9999             | NS |
| Young-Mature      | 0.007862        | 0.080163          | 0.098          | 1.0000             | NS |
| Young-Nurse       | 0.039705        | 0.082950          | 0.479          | 0.9997             | NS |
