# Supplementary material for: Biomarkers in a socially exchanged fluid reflect colony maturity, behavior, and distributed metabolism
Source: eLife. 2021 Nov 2;10:e74005. doi: 10.7554/eLife.74005 (PMC8608388; doi:10.7554/eLife.74005)
Supplement: Figure 6—source data 1. — Sheet 1 provides the network characteristics for all gene set enrichment analyses. The detailed results for each network are presented in sheet 2 for the 60 most abundant proteins, and in sheet 3 for the trophallactic fluid proteins significantly differing in two out of three of our statistical methods, first combined and then separately for the three main comparisons. In each case, analysis was performed on D. melanogaster orthologs of C. floridanus proteins. Observed gene count indicates how many proteins in the network are annotated with the term. Background gene count indicates how many proteins in total have this term, in this network and in the background. Strength describes how large the enrichment effect is: log10(observed proteins / expected proteins in a random network of this size). False Discovery Rate describes how significant the enrichment is. p-Values are corrected for multiple testing within each category using the Benjamini– Hochberg procedure. The significant annotations are indicated for GO: Biological process (GO:BP), GO: Molecular function (GO:MF), GO: Cellular component (GO:CC), Reactome pathways and KEGG pathways. [file elife-74005-fig6-data1.xlsx]

## Sheet: source data 1
Proteins used	N nodes	N edges	Avg. local clustering coefficient	Avg. node degree:	Expected number of edges:	PPI enrichment p-value:
60 most abundant	41	32	0.361	1.56	8	2.31e-10
Significant in 2/3, in any comparison	44	44	0.312	2	13	2.35e-11
Significant in 2/3, Nurse vs forager	19	6	0.158	0.632	1	0.000257
Significant in 2/3, Young vs mature	10	4	0.5	0.8	1	0.00189
Significant in 2/3, Field vs lab	20	11	0.583	1.1	5	0.0203
Figure 6—source data 1. Network characteristics for all gene set enrichment analyses.
The detailed results for each network are presented in Figure 6—source data 2 (for 60 most abundant proteins) and Figure 6—source data 3 (for significantly differing proteins, divided by comparison).

## Sheet: source data 2
60 most abundant proteins
	Description	Observed gene count	Background gene count	Strength	False discovery rate	#term ID	Matching proteins in the network
GO: Biological process	carbohydrate metabolic process	8	236	1.06	0.00025	GO:0005975	Idgf4,Hexo1,LM408,Mal-B1,Gld,smp-30,tobi,Amy-d
	lipid transport	5	75	1.36	0.00095	GO:0006869	Npc2a,Npc2g,Rfabg,Npc2e,CG30503
	sterol transport	3	22	1.67	0.0071	GO:0015918	Npc2a,Npc2g,Npc2e
	metabolic process	26	4926	0.25	0.022	GO:0008152	Idgf4,PHGPx,Hexo1,RNaseX25,RpL40,Npc2a,DhpD,CG4017,LM408,Mal-B1,Gld,Act87E,smp-30,DNaseII,CG4572,tobi,CG14516,Amy-d,epsilonTry,CG30016,cathD,His4,CG31269,CG30503,Sod,CG9449
	intracellular cholesterol transport	2	7	1.99	0.0235	GO:0032367	Npc2a,Npc2g
	primary metabolic process	23	4093	0.28	0.0235	GO:0044238	Idgf4,Hexo1,RNaseX25,RpL40,Npc2a,DhpD,CG4017,LM408,Mal-B1,Gld,Act87E,smp-30,DNaseII,CG4572,tobi,CG14516,Amy-d,epsilonTry,CG30016,cathD,His4,CG31269,CG30503
	monosaccharide metabolic process	3	55	1.27	0.0323	GO:0005996	LM408,Gld,smp-30
	nurse cell apoptotic process	2	13	1.72	0.0395	GO:0045476	DNaseII,cathD
	protein deglycosylation	2	14	1.69	0.0416	GO:0006517	Hexo1,LM408
	organic substance metabolic process	23	4432	0.25	0.0418	GO:0071704	Idgf4,Hexo1,RNaseX25,RpL40,Npc2a,DhpD,CG4017,LM408,Mal-B1,Gld,Act87E,smp-30,DNaseII,CG4572,tobi,CG14516,Amy-d,epsilonTry,CG30016,cathD,His4,CG31269,CG30503
	organic substance catabolic process	8	735	0.57	0.0423	GO:1901575	Idgf4,RNaseX25,RpL40,DhpD,DNaseII,CG4572,CG14516,cathD
	hydrolase activity	21	1685	0.63	2.37e-07	GO:0016787	CG6414,Idgf4,Hexo1,RNaseX25,DhpD,CG4017,LM408,Mal-B1,smp-30,DNaseII,CG4572,tobi,CG14516,Vha16-1,Amy-d,epsilonTry,CG30016,cathD,CG31269,CG30503,CG9449
	hydrolase activity, hydrolyzing O-glycosyl compounds	6	97	1.32	4.32e-05	GO:0004553	Idgf4,Hexo1,LM408,Mal-B1,tobi,Amy-d
GO: Molecular function	catalytic activity	24	3739	0.34	0.00066	GO:0003824	CG6414,Idgf4,PHGPx,Hexo1,RNaseX25,DhpD,CG4017,LM408,Mal-B1,Gld,smp-30,DNaseII,CG4572,tobi,CG14516,Vha16-1,Amy-d,epsilonTry,CG30016,cathD,CG31269,CG30503,Sod,CG9449
	sterol binding	3	14	1.86	0.00066	GO:0032934	Npc2a,Npc2g,Npc2e
	lipid antigen binding	2	3	2.36	0.002	GO:0030882	Npc2a,Npc2e
	lipoteichoic acid binding	2	3	2.36	0.002	GO:0070891	Npc2a,Npc2e
	lipopolysaccharide binding	2	6	2.05	0.004	GO:0001530	Npc2a,Npc2e
	endonuclease activity, active with either ribo- or deoxyribonucleic acids and producing 3'-phosphomonoesters	2	8	1.93	0.0058	GO:0016894	RNaseX25,DNaseII
	lipid binding	4	140	0.99	0.0116	GO:0008289	Npc2a,Npc2g,Rfabg,Npc2e
	peptidoglycan binding	2	18	1.58	0.0203	GO:0042834	Npc2a,Npc2e
	hydrolase activity, acting on ester bonds	6	435	0.67	0.0206	GO:0016788	CG6414,RNaseX25,smp-30,DNaseII,CG30503,CG9449
	carboxylic ester hydrolase activity	3	96	1.03	0.0345	GO:0052689	CG6414,smp-30,CG30503
	exopeptidase activity	3	100	1.01	0.0362	GO:0008238	CG4017,CG4572,CG14516
	carboxypeptidase activity	2	29	1.37	0.0372	GO:0004180	CG4017,CG4572
	peptidase activity, acting on L-amino acid peptides	6	533	0.58	0.0434	GO:0070011	CG4017,CG4572,CG14516,epsilonTry,cathD,CG31269
GO:CC	extracellular space	11	454	0.92	5.81e-06	GO:0005615	Lsp1gamma,RNaseX25,Npc2a,Lsp1beta,CG4017,Spn43Aa,Rfabg,Lsp2,Npc2e,Sod,CG9449
	larval serum protein complex	3	4	2.41	3.74e-05	GO:0005616	Lsp1gamma,Lsp1beta,Lsp2
	extracellular region	13	953	0.67	6.65e-05	GO:0005576	Idgf4,Lsp1gamma,RNaseX25,Npc2a,Lsp1beta,CG4017,smp-30,Spn43Aa,Rfabg,Lsp2,Npc2e,Sod,CG9449
Reactome	Neutrophil degranulation	10	408	0.92	3.05e-05	DME-6798695	Hexo1,RNaseX25,Npc2a,LM408,CG14516,Vha16-1,CG30016,cathD,CREG,CG9449
	Innate Immune System	11	574	0.81	3.83e-05	DME-168249	Hexo1,RNaseX25,Npc2a,CG4017,LM408,CG14516,Vha16-1,CG30016,cathD,CREG,CG9449
KEGG pathway	Lysosome	9	117	1.42	2.03e-09	dme04142	Hexo1,Npc2a,LM408,DNaseII,Npc2g,Vha16-1,Tsp42Ea,cathD,Npc2e
	Starch and sucrose metabolism	3	33	1.49	0.002	dme00500	Mal-B1,tobi,Amy-d
	Metabolic pathways	10	994	0.53	0.0042	dme01100	Hexo1,DhpD,Mal-B1,Gld,tobi,CG14516,Vha16-1,Amy-d,CG30016,CG30503
	Arachidonic acid metabolism	2	17	1.6	0.0087	dme00590	PHGPx,CG30503
	Other glycan degradation	2	22	1.49	0.0111	dme00511	Hexo1,LM408
	Galactose metabolism	2	37	1.26	0.0242	dme00052	Mal-B1,tobi
	Figure 6—source data 2. Gene set enrichment analysis for the most abundant trophallactic fluid proteins.
	Gene set enrichment analysis results for the D. melanogaster orthologs of the 60 most abundant trophallactic fluid proteins. Observed gene count indicates how many proteins in the network are annotated with the term. Background gene count indicates how many proteins in total have this term, in this network and in the background. Strength describes how large the enrichment effect is: log10(observe…

## Sheet: source data 3
Significant in 2 out of 3 analysis methods in any comparison
	Description	Observed gene count	Background gene count	Strength	False discovery rate	#term ID	Matching proteins in the network
GO:BP	carbohydrate metabolic process	10	236	1.13	2.15e-06	GO:0005975	Hexo2,Treh,Tal,Hexo1,LM408,Mdh1,Gld,tobi,Amy-d,Amy-p
	oxidation-reduction process	11	694	0.7	0.0026	GO:0055114	blw,Tal,Mdh1,Gld,Men,CG16935,CG7737,PPO2,CG10638,GstS1,Sod
GO:MF	hydrolase activity, hydrolyzing O-glycosyl compounds	8	97	1.42	1.91e-07	GO:0004553	Hexo2,Treh,Hexo1,LM408,tobi,Amy-d,Amy-p,CG12582
	catalytic activity	27	3739	0.36	9.88e-05	GO:0003824	CG3097,Hexo2,Treh,blw,Tal,Hexo1,Vha26,DhpD,CG4017,LM408,Mdh1,Gld,Men,CG4572,tobi,CG14516,Amy-d,Amy-p,CG16935,ERp60,CG7737,PPO2,cathD,CG10638,CG12582,GstS1,Sod
	hydrolase activity	16	1685	0.48	0.0014	GO:0016787	CG3097,Hexo2,Treh,blw,Hexo1,Vha26,DhpD,CG4017,LM408,CG4572,tobi,CG14516,Amy-d,Amy-p,cathD,CG12582
	alpha-amylase activity	2	2	2.5	0.002	GO:0004556	Amy-d,Amy-p
	oxidoreductase	9	598	0.68	0.0027	GO:0016491	Mdh1,Gld,Men,CG16935,CG7737,PPO2,CG10638,GstS1,Sod
	activity
	carboxypeptidase activity	3	29	1.52	0.0029	GO:0004180	CG3097,CG4017,CG4572
	beta-N-acetylglucosaminidase activity	2	4	2.2	0.0029	GO:0016231	Hexo2,Hexo1
	exopeptidase activity	4	100	1.1	0.0045	GO:0008238	CG3097,CG4017,CG4572,CG14516
	malate dehydrogenase activity	2	9	1.85	0.007	GO:0016615	Mdh1,Men
	metalloexopeptidase activity	3	61	1.19	0.0132	GO:0008235	CG3097,CG4017,CG14516
	mannosidase	2	14	1.66	0.0132	GO:0015923	LM408,CG12582
	activity
	oxidoreductase activity, acting on CH-OH group of donors	3	81	1.07	0.0253	GO:0016614	Mdh1,Gld,Men
	metallocarboxypeptidase activity	2	24	1.42	0.0307	GO:0004181	CG3097,CG4017
GO:CC	extracellular space	11	454	0.88	1.54e-05	GO:0005615	CG3097,CG10433,Lsp1gamma,Obp19d,Lsp1beta,CG4017,PPO2,Spn43Aa,Rfabg,Lsp2,Sod
	larval serum protein complex	3	4	2.38	5.56e-05	GO:0005616	Lsp1gamma,Lsp1beta,Lsp2
Reactome pathway	Metabolism	9	833	0.53	0.0126	DME-1430728	Hexo2,Tal,Hexo1,DhpD,LM408,Mdh1,CG16935,CG12582,GstS1
	Complement cascade	2	20	1.5	0.0129	DME-166658	CG3097,CG4017
KEGG pathway	Metabolic pathways	17	994	0.73	1.4e-07	dme01100	Hexo2,Treh,blw,Tal,Hexo1,Vha26,DhpD,Mdh1,Gld,Men,tobi,CG14516,Amy-d,Amy-p,CG16935,CG10638,GstS1
	Lysosome	7	117	1.28	1.97e-06	dme04142	Hexo2,Hexo1,LM408,Npc2c,Tsp42Ea,cathD,CG12582
	Other glycan degradation	4	22	1.76	1.5e-05	dme00511	Hexo2,Hexo1,LM408,CG12582
	Starch and sucrose metabolism	4	33	1.58	4.84e-05	dme00500	Treh,tobi,Amy-d,Amy-p
	Glycosphingolipid biosynthesis - ganglio series	2	5	2.1	0.0015	dme00604	Hexo2,Hexo1
	Glycosphingolipid biosynthesis - globo and isoglobo series	2	6	2.02	0.0017	dme00603	Hexo2,Hexo1
	Glycosaminoglycan degradation	2	15	1.63	0.0068	dme00531	Hexo2,Hexo1
	Pentose phosphate pathway	2	24	1.42	0.0139	dme00030	Tal,Gld
	Galactose metabolism	2	37	1.23	0.026	dme00052	tobi,CG10638
	Carbon metabolism	3	117	0.91	0.026	dme01200	Tal,Mdh1,Men
	Amino sugar and nucleotide sugar metabolism	2	47	1.13	0.0322	dme00520	Hexo2,Hexo1
	Pyruvate metabolism	2	45	1.15	0.0322	dme00620	Mdh1,Men
Significant in Nurse vs Forager
	Description	Observed gene count	Background gene count	Strength	False discovery rate	#term ID	Matching proteins in the network
GO:BP	carbohydrate metabolic process	6	236	1.27	0.00017	GO:0005975	Treh,Hexo1,Mdh1,Gld,tobi,Amy-p
	malate metabolic process	2	11	2.12	0.0198	GO:0006108	Mdh1,Men
	oxidation-reduction process	6	694	0.8	0.0234	GO:0055114	Mdh1,Gld,Men,CG7737,PPO2,CG10638
GO:MF	hydrolase activity, hydrolyzing O-glycosyl compounds	5	97	1.58	2.01e-05	GO:0004553	Treh,Hexo1,tobi,Amy-p,CG12582
	catalytic activity	14	3739	0.44	0.00093	GO:0003824	Treh,Hexo1,Vha26,Mdh1,Gld,Men,CG4572,tobi,CG14516,Amy-p,CG7737,PPO2,CG10638,CG12582
	oxidoreductase activity	6	598	0.87	0.0024	GO:0016491	Mdh1,Gld,Men,CG7737,PPO2,CG10638
	malate dehydrogenase activity	2	9	2.21	0.0024	GO:0016615	Mdh1,Men
	oxidoreductase activity, acting on CH-OH group of donors	3	81	1.43	0.0031	GO:0016614	Mdh1,Gld,Men
	hydrolase activity	8	1685	0.54	0.0143	GO:0016787	Treh,Hexo1,Vha26,CG4572,tobi,CG14516,Amy-p,CG12582
	oxidoreductase activity, acting on the CH-OH group of donors, NAD or NADP as acceptor	2	53	1.44	0.0309	GO:0016616	Mdh1,Men
KEGG pathways	Metabolic pathways	10	994	0.87	4.16e-06	dme01100	Treh,Hexo1,Vha26,Mdh1,Gld,Men,tobi,CG14516,Amy-p,CG10638
	Starch and sucrose metabolism	3	33	1.82	0.00017	dme00500	Treh,tobi,Amy-p
	Lysosome	4	117	1.4	0.00017	dme04142	Hexo1,Npc2c,Tsp42Ea,CG12582
	Other glycan degradation	2	22	1.82	0.0027	dme00511	Hexo1,CG12582
	Galactose metabolism	2	37	1.6	0.0058	dme00052	tobi,CG10638
	Pyruvate metabolism	2	45	1.51	0.007	dme00620	Mdh1,Men
	Carbon metabolism	2	117	1.1	0.0369	dme01200	Mdh1,Men
Significant in Young vs Mature
GO:BP	carbohydrate	4	236	1.37	0.0047	GO:0005975	Gld,tobi,Amy-d,Amy-p
	metabolic
	process
GO:MF	alpha-amylase activity	2	2	3.14	0.00017	GO:0004556	Amy-d,Amy-p
	hydrolase activity, hydrolyzing O-glycosyl compounds	3	97	1.63	0.00086	GO:0004553	tobi,Amy-d,Amy-p
	calcium ion binding	3	206	1.31	0.0046	GO:0005509	Amy-d,Amy-p,Cam
	ion binding	6	1993	0.62	0.0111	GO:0043167	DhpD,Gld,Amy-d,Amy-p,Rfabg,Cam
	hydrolase activity	5	1685	0.62	0.0343	GO:0016787	DhpD,tobi,Amy-d,Amy-p,cathD
	metal ion binding	4	1027	0.73	0.0343	GO:0046872	DhpD,Amy-d,Amy-p,Cam
KEGG	Starch and sucrose metabolism	3	33	2.1	1.69e-05	dme00500	tobi,Amy-d,Amy-p
	Metabolic pathways	5	994	0.85	0.0016	dme01100	DhpD,Gld,tobi,Amy-d,Amy-p
Significant in Field vs Lab
GO:CC	extracellular space	6	454	0.96	0.0024	GO:0005615	CG3097,CG10433,Lsp1beta,CG4017,Lsp2,Sod
	larval serum protein complex	2	4	2.54	0.0024	GO:0005616	Lsp1beta,Lsp2
Reactome	Complement cascade	2	20	1.84	0.0035	DME-166658	CG3097,CG4017
	Metabolism	5	833	0.62	0.0225	DME-1430728	Hexo2,Tal,LM408,CG16935,GstS1
KEGG	Other glycan degradation	2	22	1.8	0.0127	dme00511	Hexo2,LM408
	Lysosome	3	117	1.25	0.0127	dme04142	Hexo2,LM408,cathD
	Figure 6—source data 3. Gene set enrichment analysis for the significantly differing proteins.
	Gene set enrichment analysis results for the D. melanogaster orthologs of the trophallactic fluid proteins significantly differing in two out of three of our statistical methods, first combined and then separately for the three main comparisons. Observed gene count indicates how many proteins in the network are annotated with the term. Background gene count indicates how many proteins in total ha…
