# Supplementary material for: Biomarkers in a socially exchanged fluid reflect colony maturity, behavior, and distributed metabolism
Source: eLife journal article supplement (doi:10.7554/elife.74005), 2021-11-01
Supplement: supp [file elife_poa_e74005_Figure_2_figure_supplement_1.pdf › elife_poa_e74005_Figure_2_figure_supplement_1.pdf]

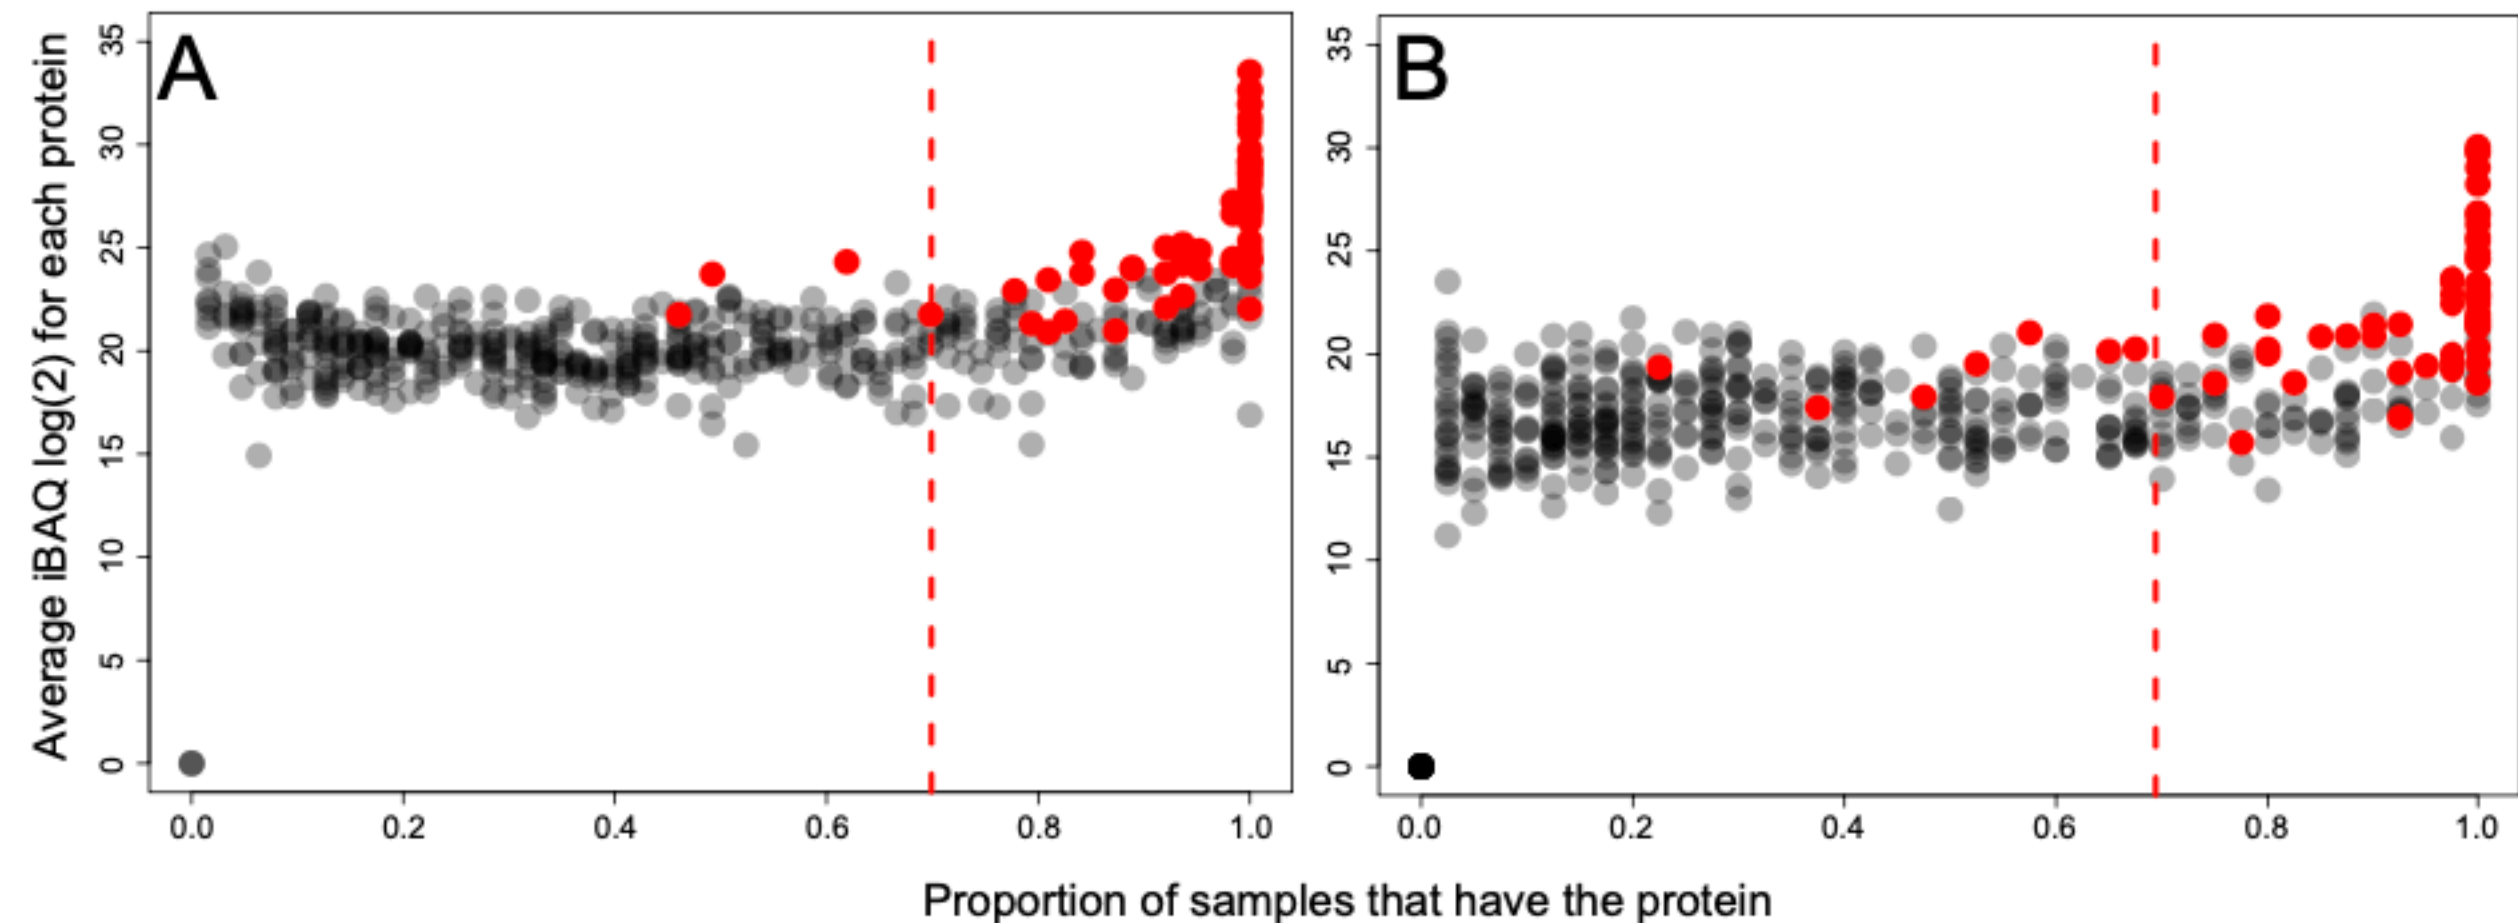

Figure 2 - Figure Supplement 1: Protein abundance and commonness

Protein abundances of the 519 proteins, calculated without missing values (where no matching spectra were detected), in A) the colony dataset, and B) in the single individual dataset. The proteins highlighted in red are the most abundant ones when calculated including missing values in both datasets combined, as shown in Figure 3. The red dashed line shows the cut-off used for classical frequentist statistical analyses – for the empirical Bayes and machine learning analyses all proteins were included.
