# Supplementary material for: Biomarkers in a socially exchanged fluid reflect colony maturity, behavior, and distributed metabolism
Source: eLife journal article supplement (doi:10.7554/elife.74005), 2021-11-01
Supplement: supp [file elife_poa_e74005_Figure_4_figure_supplement_1.pdf › elife_poa_e74005_Figure_4_figure_supplement_1.pdf]

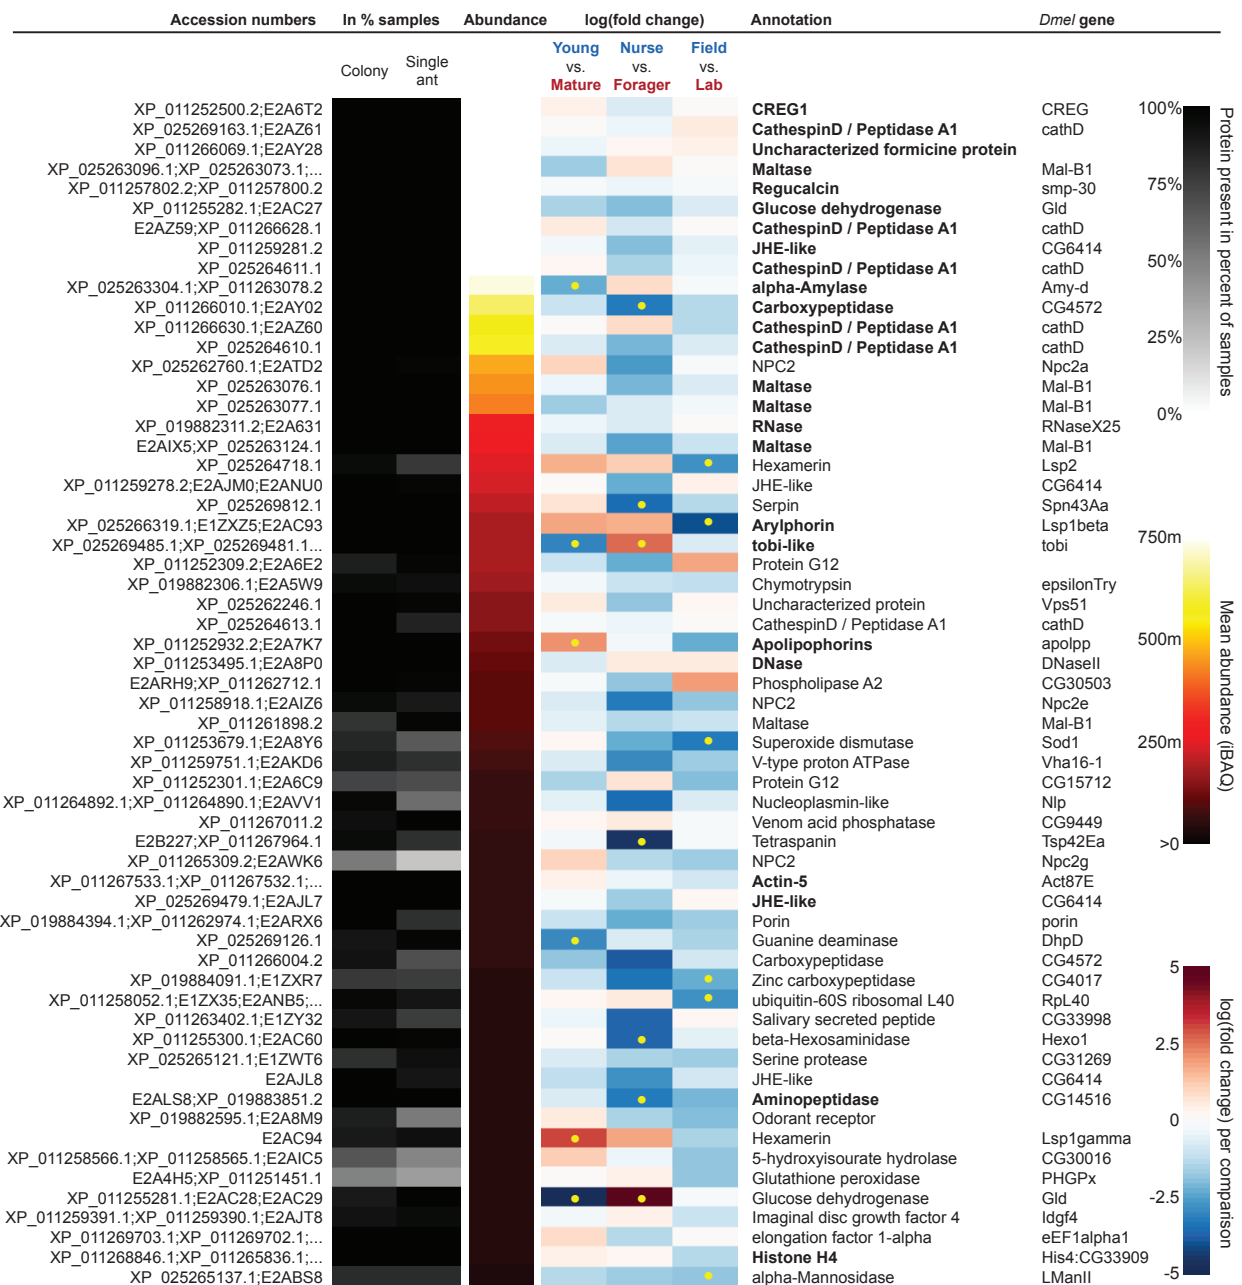

Figure 4 - Figure Supplement 1: Most abundant proteins with accession numbers

The sixty most abundant proteins in trophallactic fluid over 73 colony and 40 single individual samples. Ranking of abundance included zero values. From left to right, accession numbers, proportion of samples in which the protein was identified in colony samples and single individual samples, average iBAQ abundance across all samples, log<sub>2</sub> of the fold change in abundance between types for a given comparison, the comparisons for which the protein was significant in two out of three methods are marked with yellow dots, annotation terms. Annotation terms are bolded for the 25 out of 27 core trophallactic fluid proteins that are amongst the 60 most abundant proteins. The additional but less abundant core proteins are a cathepsin (26-29-p) and a myosin heavy chain (Mhc).
