# Supplementary material for: Biomarkers in a socially exchanged fluid reflect colony maturity, behavior, and distributed metabolism
Source: eLife journal article supplement (doi:10.7554/elife.74005), 2021-11-01
Supplement: supp [file elife_poa_e74005_Figure_5_figure_supplement_1.pdf › elife_poa_e74005_Figure_5_figure_supplement_1.pdf]

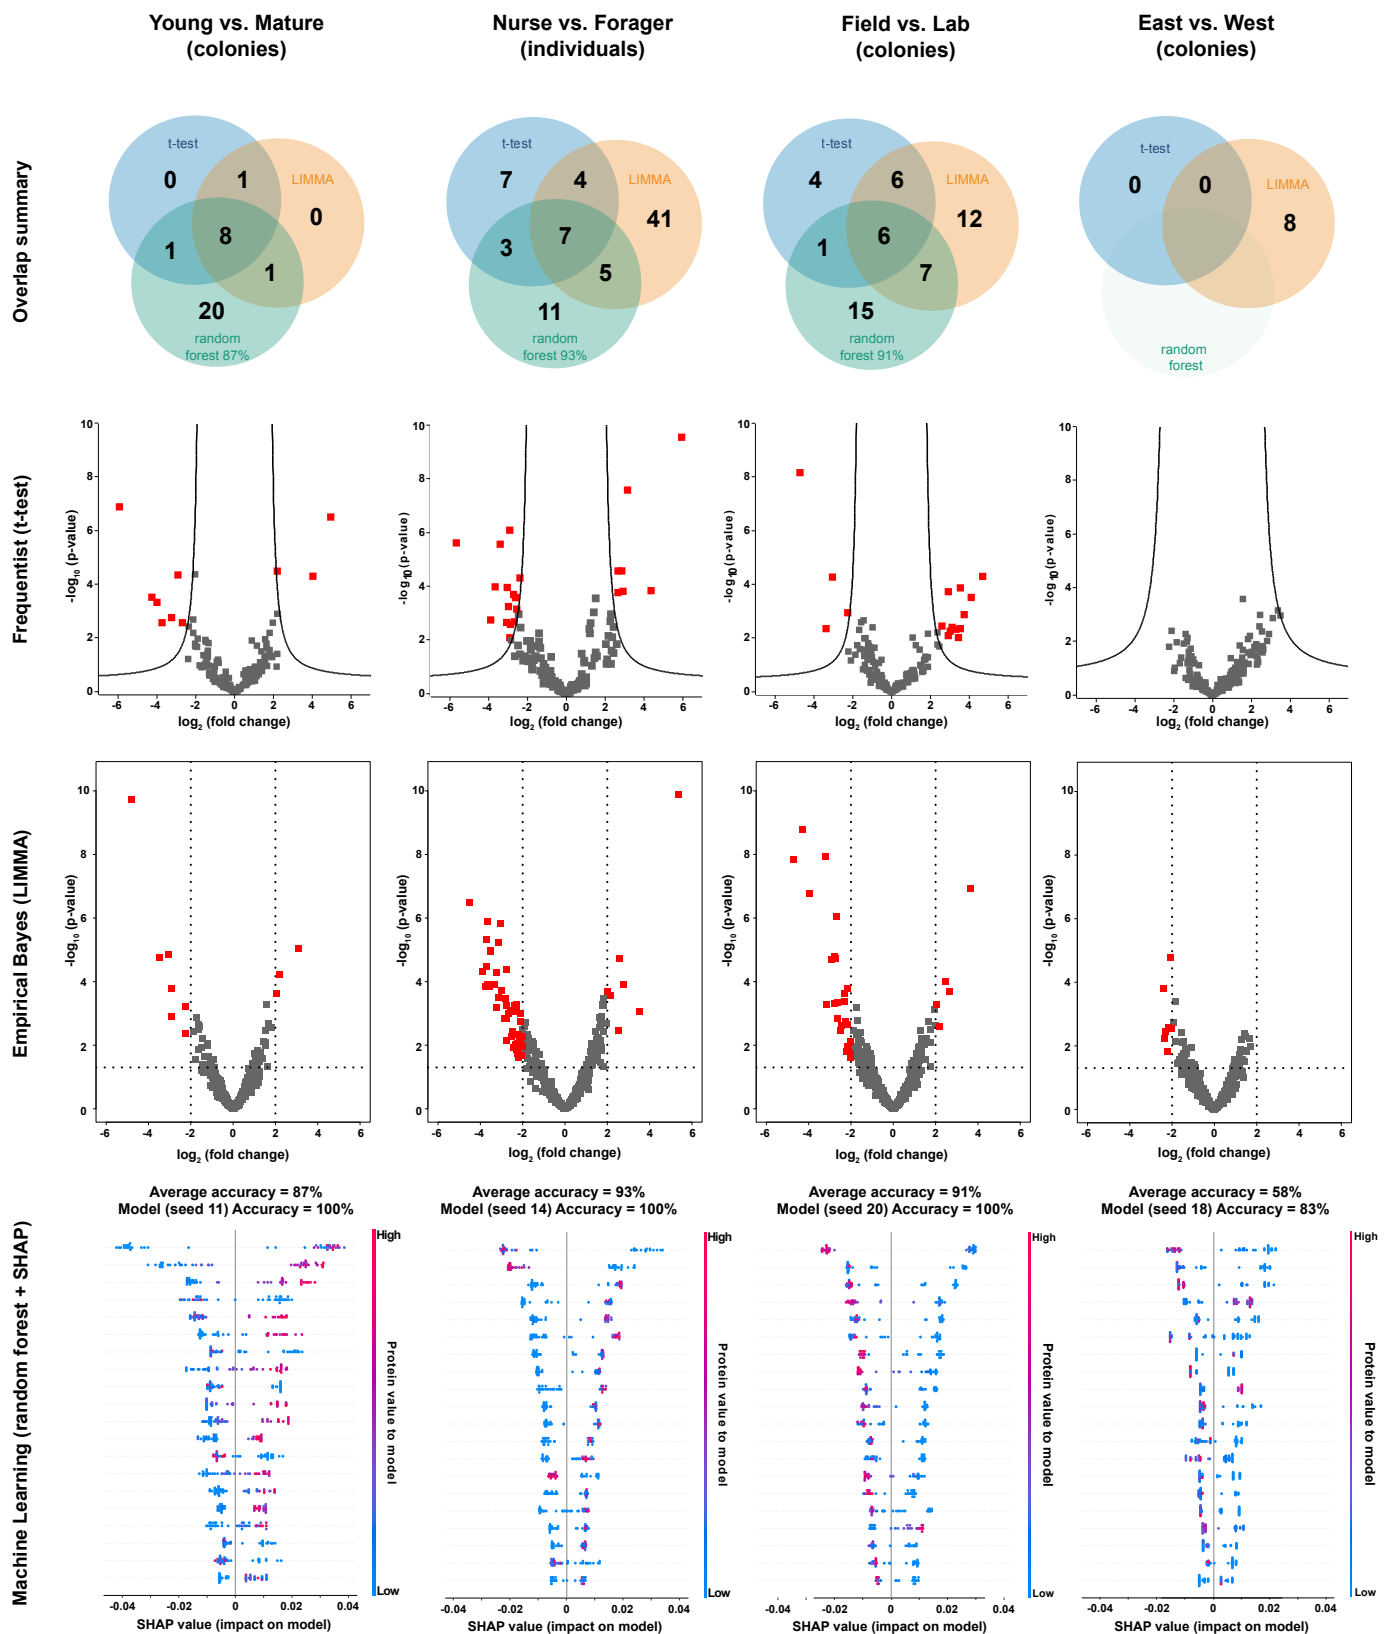

Figure 5 - Figure Supplement 1: Visualization of all results.

Venn diagrams summarizing statistical methods, frequentist volcano plots, empirical Bayes volcano plots, example SHAP value plots of feature importance the top 20 proteins. Each SHAP plot is for one of the ten models trained. For significant proteins, see Supplemental file 2, for full model results, see Supplemental files 3-5.
