# Supplementary material for: Biomarkers in a socially exchanged fluid reflect colony maturity, behavior, and distributed metabolism
Source: eLife journal article supplement (doi:10.7554/elife.74005), 2021-11-01
Supplement: supp [file elife_poa_e74005_Figure_6_figure_supplement_1.pdf › elife_poa_e74005_Figure_6_figure_supplement_1.pdf]

---

Figure 6 - Figure Supplement 1: Network characteristics for all gene set enrichment analyses

The detailed results for each network are presented in Figure 6 - Figure Supplement 2 (for 60 most abundant proteins) and Figure 6 - Figure Supplement 3 (for significantly differing proteins, divided by comparison).

| <b>Proteins used</b>                  | <b>N nodes</b> | <b>N edges</b> | <b>Avg. local clustering coefficient</b> | <b>Avg. node degree:</b> |
|---------------------------------------|----------------|----------------|------------------------------------------|--------------------------|
| 60 most abundant                      | 41             | 32             | 0.361                                    | 1.56                     |
| Significant in 2/3, in any comparison | 44             | 44             | 0.312                                    | 2                        |
| Significant in 2/3, Nurse vs forager  | 19             | 6              | 0.158                                    | 0.632                    |
| Significant in 2/3, Young vs mature   | 10             | 4              | 0.5                                      | 0.8                      |
| Significant in 2/3, Field vs lab      | 20             | 11             | 0.583                                    | 1.1                      |
