# Supplementary material for: Biomarkers in a socially exchanged fluid reflect colony maturity, behavior, and distributed metabolism
Source: eLife journal article supplement (doi:10.7554/elife.74005), 2021-11-01
Supplement: supp [file elife_poa_e74005_Figure_6_figure_supplement_2.pdf › elife_poa_e74005_Figure_6_figure_supplement_2.pdf]

---

Figure 6 - Figure Supplement 2: Gene set enrichment analysis for the most abundant trophallactic fluid proteins

(Next two pages) Gene set enrichment analysis results for the *D. melanogaster* orthologs of the 60 most abundant trophallactic fluid proteins. Observed gene count indicates how many proteins in the network are annotated with the term. Background gene count indicates how many proteins in total have this term, in this network and in the background. Strength describes how large the enrichment effect is:  $\log_{10}(\text{observed proteins} / \text{expected proteins in a random network of this size})$ . False Discovery Rate describes how significant the enrichment is. P-values are corrected for multiple testing within each category using the Benjamini–Hochberg procedure.

| 60 most abundant proteins                            |                        |                          |          |                            |            |                                                                                                                                                                                                        |
|------------------------------------------------------|------------------------|--------------------------|----------|----------------------------|------------|--------------------------------------------------------------------------------------------------------------------------------------------------------------------------------------------------------|
| Description                                          | Observed<br>gene count | Background<br>gene count | Strength | False<br>discovery<br>rate | #term ID   | Matching proteins in the network                                                                                                                                                                       |
| carbohydrate metabolic process                       | 8                      | 236                      | 1.06     | 0.00025                    | GO:0005975 | Idgf4, Hexo1, LM408, Mal-B1, Gld, smp-30, tobi, Amy-d                                                                                                                                                  |
| lipid transport                                      | 5                      | 75                       | 1.36     | 0.00095                    | GO:0006869 | Npc2a, Npc2g, Rfabg, Npc2e, CG30503                                                                                                                                                                    |
| sterol transport                                     | 3                      | 22                       | 1.67     | 0.0071                     | GO:0015918 | Npc2a, Npc2g, Npc2e                                                                                                                                                                                    |
| metabolic process                                    | 26                     | 4926                     | 0.25     | 0.022                      | GO:0008152 | Idgf4, PHGPx, Hexo1, RNaseX25, Rpl40, Npc2a, DhpD, CG4017, LM408, Mal-B1, Gld, Act87E, smp-30, DNaseII, CG4572, tobi, CG14516, Amy-d, epsilon Try, CG30016, cathD, His4, CG31269, CG30503, Sod, CG9449 |
| intracellular cholesterol transport                  | 2                      | 7                        | 1.99     | 0.0235                     | GO:0032367 | Npc2a, Npc2g                                                                                                                                                                                           |
| primary metabolic process                            | 23                     | 4093                     | 0.28     | 0.0235                     | GO:0044238 | Idgf4, Hexo1, RNaseX25, Rpl40, Npc2a, DhpD, CG4017, LM408, Mal-B1, Gld, Act87E, smp-30, DNaseII, CG4572, tobi, CG14516, Amy-d, epsilon Try, CG30016, cathD, His4, CG31269, CG30503                     |
| monosaccharide metabolic process                     | 3                      | 55                       | 1.27     | 0.0323                     | GO:0005996 | LM408, Gld, smp-30                                                                                                                                                                                     |
| nurse cell apoptotic process                         | 2                      | 13                       | 1.72     | 0.0395                     | GO:0045476 | DNaseII, cathD                                                                                                                                                                                         |
| protein deglycosylation                              | 2                      | 14                       | 1.69     | 0.0416                     | GO:0006517 | Hexo1, LM408                                                                                                                                                                                           |
| organic substance metabolic process                  | 23                     | 4432                     | 0.25     | 0.0418                     | GO:0071704 | Idgf4, Hexo1, RNaseX25, Rpl40, Npc2a, DhpD, CG4017, LM408, Mal-B1, Gld, Act87E, smp-30, DNaseII, CG4572, tobi, CG14516, Amy-d, epsilon Try, CG30016, cathD, His4, CG31269, CG30503                     |
| organic substance catabolic process                  | 8                      | 735                      | 0.57     | 0.0423                     | GO:1901575 | Idgf4, RNaseX25, Rpl40, DhpD, DNaseII, CG4572, CG14516, cathD                                                                                                                                          |
| hydrolase activity                                   | 21                     | 1685                     | 0.63     | 2.37E-07                   | GO:0016787 | CG6414, Idgf4, Hexo1, RNaseX25, DhpD, CG4017, LM408, Mal-B1, smp-30, DNaseII, CG4572, tobi, CG14516, Vha16-1, Amy-d, epsilon Try, CG30016, cathD, CG31269, CG30503, CG9449                             |
| hydrolase activity, hydrolyzing O-glycosyl compounds | 6                      | 97                       | 1.32     | 4.32E-05                   | GO:0004553 | Idgf4, Hexo1, LM408, Mal-B1, tobi, Amy-d                                                                                                                                                               |
| catalytic activity                                   | 24                     | 3739                     | 0.34     | 0.00066                    | GO:0003824 | CG6414, Idgf4, PHGPx, Hexo1, RNaseX25, DhpD, CG4017, LM408, Mal-B1, Gld, smp-30, DNaseII, CG4572, tobi, CG14516, Vha16-1, Amy-d, epsilon Try, CG30016, cathD, CG31269, CG30503, Sod, CG9449            |
| sterol binding                                       | 3                      | 14                       | 1.86     | 0.00066                    | GO:0032934 | Npc2a, Npc2g, Npc2e                                                                                                                                                                                    |
| lipid antigen binding                                | 2                      | 3                        | 2.36     | 0.002                      | GO:0030882 | Npc2a, Npc2e                                                                                                                                                                                           |
| lipoteichoic acid binding                            | 2                      | 3                        | 2.36     | 0.002                      | GO:0070891 | Npc2a, Npc2e                                                                                                                                                                                           |
| lipopolysaccharide binding                           | 2                      | 6                        | 2.05     | 0.004                      | GO:0001530 | Npc2a, Npc2e                                                                                                                                                                                           |

|                        |                                                                                                              |    |     |      |          |             |                                                                                           |
|------------------------|--------------------------------------------------------------------------------------------------------------|----|-----|------|----------|-------------|-------------------------------------------------------------------------------------------|
| GO: Molecular function | endonuclease activity, active with either ribo- or deoxyribonucleic acids and producing 3'-phosphomonoesters | 2  | 8   | 1.93 | 0.0058   | GO:0016894  | RNaseX25, DNaseII                                                                         |
|                        | lipid binding                                                                                                | 4  | 140 | 0.99 | 0.0116   | GO:0008289  | Npc2a,Npc2g,Rfabg,Npc2e                                                                   |
|                        | peptidoglycan binding                                                                                        | 2  | 18  | 1.58 | 0.0203   | GO:0042834  | Npc2a,Npc2e                                                                               |
|                        | hydrolase activity, acting on ester bonds                                                                    | 6  | 435 | 0.67 | 0.0206   | GO:0016788  | CG6414,RNaseX25,smp-30, DNaseII, CG30503, CG9449                                          |
|                        | carboxylic ester hydrolase activity                                                                          | 3  | 96  | 1.03 | 0.0345   | GO:0052689  | CG6414,smp-30, CG30503                                                                    |
|                        | exopeptidase activity                                                                                        | 3  | 100 | 1.01 | 0.0362   | GO:0008238  | CG4017,CG4572,CG14516                                                                     |
|                        | carboxypeptidase activity                                                                                    | 2  | 29  | 1.37 | 0.0372   | GO:0004180  | CG4017,CG4572                                                                             |
|                        | peptidase activity, acting on L-amino acid peptides                                                          | 6  | 533 | 0.58 | 0.0434   | GO:0070011  | CG4017,CG4572,CG14516,epsilonTry,cathD,CG31269                                            |
|                        | extracellular space                                                                                          | 11 | 454 | 0.92 | 5.81E-06 | GO:0005615  | Lsp1gamma,RNaseX25,Npc2a,Lsp1beta,CG4017,Spn43Aa,Rfabg,Lsp2,Npc2e,Sod,CG9449              |
|                        | larval serum protein complex                                                                                 | 3  | 4   | 2.41 | 3.74E-05 | GO:0005616  | Lsp1gamma,Lsp1beta,Lsp2                                                                   |
| GO:CC                  | extracellular region                                                                                         | 13 | 953 | 0.67 | 6.65E-05 | GO:0005576  | Idgf4,Lsp1gamma,RNaseX25,Npc2a,Lsp1beta,CG4017,smp-30,Spn43Aa,Rfabg,Lsp2,Npc2e,Sod,CG9449 |
|                        | Neutrophil degranulation                                                                                     | 10 | 408 | 0.92 | 3.05E-05 | DME-6798695 | Hexo1,RNaseX25,Npc2a,LM408,CG14516,Vha16-1,CG30016,cathD,CREG,CG9449                      |
|                        | Innate Immune System                                                                                         | 11 | 574 | 0.81 | 3.83E-05 | DME-168249  | Hexo1,RNaseX25,Npc2a,CG4017,LM408,CG14516,Vha16-1,CG30016,cathD,CREG,CG9449               |
|                        | Lysosome                                                                                                     | 9  | 117 | 1.42 | 2.03E-09 | dme04142    | Hexo1,Npc2a,LM408,DNaseII,Npc2g,Vha16-1,Tsp42Ea,cathD,Npc2e                               |
| KEGG pathway           | Starch and sucrose metabolism                                                                                | 3  | 33  | 1.49 | 0.002    | dme00500    | Mal-B1,tobi,Amy-d                                                                         |
|                        | Metabolic pathways                                                                                           | 10 | 994 | 0.53 | 0.0042   | dme01100    | Hexo1,DhpD,Mal-B1,Gld,tobi,CG14516,Vha16-1,Amy-d,CG30016,CG30503                          |
|                        | Arachidonic acid metabolism                                                                                  | 2  | 17  | 1.6  | 0.0087   | dme00590    | PHGPx,CG30503                                                                             |
|                        | Other glycan degradation                                                                                     | 2  | 22  | 1.49 | 0.0111   | dme00511    | Hexo1,LM408                                                                               |
|                        | Galactose metabolism                                                                                         | 2  | 37  | 1.26 | 0.0242   | dme00052    | Mal-B1,tobi                                                                               |
