# Supplementary material for: Biomarkers in a socially exchanged fluid reflect colony maturity, behavior, and distributed metabolism
Source: eLife journal article supplement (doi:10.7554/elife.74005), 2021-11-01
Supplement: supp [file elife_poa_e74005_Figure_6_figure_supplement_3.pdf › elife_poa_e74005_Figure_6_figure_supplement_3.pdf]

---

Figure 6 - Figure Supplement 3: Gene set enrichment analysis for the significantly differing proteins

(Next three pages) Gene set enrichment analysis results for the *D. melanogaster* orthologs of the trophallactic fluid proteins significantly differing in two out of three of our statistical methods, first combined and then separately for the three main comparisons. Observed gene count indicates how many proteins in the network are annotated with the term. Background gene count indicates how many proteins in total have this term, in this network and in the background. Strength describes how large the enrichment effect is:  $\log_{10}(\text{observed proteins} / \text{expected proteins in a random network of this size})$ . False Discovery Rate describes how significant the enrichment is. P-values are corrected for multiple testing within each category using the Benjamini–Hochberg procedure. The significant annotations are indicated for GO: Biological process (GO:BP), GO: Molecular function (GO:MF), GO: Cellular component (GO:CC), Reactome pathways and KEGG pathways.

| Significant in 2 out of 3 analysis methods in any comparison |                                                          |                     |                       |          |                      |                                                                                                                                                                                          |
|--------------------------------------------------------------|----------------------------------------------------------|---------------------|-----------------------|----------|----------------------|------------------------------------------------------------------------------------------------------------------------------------------------------------------------------------------|
|                                                              | Description                                              | Observed gene count | Background gene count | Strength | False discovery rate | Matching proteins in the network                                                                                                                                                         |
| GO:BP                                                        | carbohydrate metabolic process                           | 10                  | 236                   | 1.13     | 2.15E-06             | Hexo2, Treh, Tal, Hexo1, LM408, Mdh1, Gld, tobi, Amy-d, Amy-p                                                                                                                            |
|                                                              | oxidation-reduction process                              | 11                  | 694                   | 0.7      | 0.0026               | blw, Tal, Mdh1, Gld, Men, CG16935, CG7737, PPO2, CG10638, GstS1, Sod                                                                                                                     |
| GO:MF                                                        | hydrolase activity, hydrolyzing O-glycosyl compounds     | 8                   | 97                    | 1.42     | 1.91E-07             | Hexo2, Treh, Hexo1, LM408, tobi, Amy-d, Amy-p, CG12582                                                                                                                                   |
|                                                              | catalytic activity                                       | 27                  | 3739                  | 0.36     | 9.88E-05             | CG3097, Hexo2, Treh, blw, Tal, Hexo1, Vha26, DhpD, CG4017, LM408, Mdh1, Gld, Men, CG4572, tobi, CG14516, Amy-d, Amy-p, CG16935, ERp60, CG7737, PPO2, cathD, CG10638, CG12582, GstS1, Sod |
|                                                              | hydrolase activity                                       | 16                  | 1685                  | 0.48     | 0.0014               | CG3097, Hexo2, Treh, blw, Hexo1, Vha26, DhpD, CG4017, LM408, CG4572, tobi, CG14516, Amy-d, Amy-p                                                                                         |
|                                                              | alpha-amylase activity                                   | 2                   | 2                     | 2.5      | 0.002                | Amy-d, Amy-p                                                                                                                                                                             |
|                                                              | oxidoreductase activity                                  | 9                   | 598                   | 0.68     | 0.0027               | Mdh1, Gld, Men, CG16935, CG7737, PPO2, CG10638, GstS1, Sod                                                                                                                               |
|                                                              | carboxypeptidase activity                                | 3                   | 29                    | 1.52     | 0.0029               | CG3097, CG4017, CG4572                                                                                                                                                                   |
|                                                              | beta-N-acetylglucosaminidase activity                    | 2                   | 4                     | 2.2      | 0.0029               | Hexo2, Hexo1                                                                                                                                                                             |
|                                                              | exopeptidase activity                                    | 4                   | 100                   | 1.1      | 0.0045               | CG3097, CG4017, CG4572, CG14516                                                                                                                                                          |
|                                                              | malate dehydrogenase activity                            | 2                   | 9                     | 1.85     | 0.007                | Mdh1, Men                                                                                                                                                                                |
|                                                              | metalloexopeptidase activity                             | 3                   | 61                    | 1.19     | 0.0132               | CG3097, CG4017, CG14516                                                                                                                                                                  |
| GO:CC                                                        | mannosidase activity                                     | 2                   | 14                    | 1.66     | 0.0132               | LM408, CG12582                                                                                                                                                                           |
|                                                              | oxidoreductase activity, acting on CH-OH group of donors | 3                   | 81                    | 1.07     | 0.0253               | Mdh1, Gld, Men                                                                                                                                                                           |
|                                                              | metallocarboxypeptidase activity                         | 2                   | 24                    | 1.42     | 0.0307               | CG3097, CG4017                                                                                                                                                                           |
|                                                              | extracellular space                                      | 11                  | 454                   | 0.88     | 1.54E-05             | CG3097, CG10433, Lsp1gamma, Obp19d, Lsp1beta, CG4017, PPO2, Spn43A, Rfabg, Lsp2, Sod                                                                                                     |
|                                                              | larval serum protein complex                             | 3                   | 4                     | 2.38     | 5.56E-05             | Lsp1gamma, Lsp1beta, Lsp2                                                                                                                                                                |
|                                                              | Metabolism                                               | 9                   | 833                   | 0.53     | 0.0126               | Hexo2, Tal, Hexo1, DhpD, LM408, Mdh1, CG16935, CG12582, GstS1                                                                                                                            |
| Reactome pathway                                             | Complement cascade                                       | 2                   | 20                    | 1.5      | 0.0129               | CG3097, CG4017                                                                                                                                                                           |

|              |                                                            |    |     |      |          |          |                                                                                                                 |
|--------------|------------------------------------------------------------|----|-----|------|----------|----------|-----------------------------------------------------------------------------------------------------------------|
| KEGG pathway | Metabolic pathways                                         | 17 | 994 | 0.73 | 1.40E-07 | dme01100 | Hexo2, Treh, blw, Tal, Hexo1, Vha26, DhpD, Mdh1, Gld, Men, tobi, CG14516, Amy-d, Amy-p, CG16935, CG10638, GstS1 |
|              | Lysosome                                                   | 7  | 117 | 1.28 | 1.97E-06 | dme04142 | Hexo2, Hexo1, LM408, Npc2c, Tsp42Ea, cathD, CG12582                                                             |
|              | Other glycan degradation                                   | 4  | 22  | 1.76 | 1.50E-05 | dme00511 | Hexo2, Hexo1, LM408, CG12582                                                                                    |
|              | Starch and sucrose metabolism                              | 4  | 33  | 1.58 | 4.84E-05 | dme00500 | Treh, tobi, Amy-d, Amy-p                                                                                        |
|              | Glycosphingolipid biosynthesis - ganglio series            | 2  | 5   | 2.1  | 0.0015   | dme00604 | Hexo2, Hexo1                                                                                                    |
|              | Glycosphingolipid biosynthesis - globo and isoglobo series | 2  | 6   | 2.02 | 0.0017   | dme00603 | Hexo2, Hexo1                                                                                                    |
|              | Glycosaminoglycan degradation                              | 2  | 15  | 1.63 | 0.0068   | dme00531 | Hexo2, Hexo1                                                                                                    |
|              | Pentose phosphate pathway                                  | 2  | 24  | 1.42 | 0.0139   | dme00030 | Tal, Gld                                                                                                        |
|              | Galactose metabolism                                       | 2  | 37  | 1.23 | 0.026    | dme00052 | tobi, CG10638                                                                                                   |
|              | Carbon metabolism                                          | 3  | 117 | 0.91 | 0.026    | dme01200 | Tal, Mdh1, Men                                                                                                  |
|              | Amino sugar and nucleotide sugar metabolism                | 2  | 47  | 1.13 | 0.0322   | dme00520 | Hexo2, Hexo1                                                                                                    |
|              | Pyruvate metabolism                                        | 2  | 45  | 1.15 | 0.0322   | dme00620 | Mdh1, Men                                                                                                       |

#### Significant in Nurse vs Forager

|       | Description                                              | Observed gene count | Background gene count | Strength | False discovery rate | #term ID   | Matching proteins in the network                                                                 |
|-------|----------------------------------------------------------|---------------------|-----------------------|----------|----------------------|------------|--------------------------------------------------------------------------------------------------|
| GO:BP | carbohydrate metabolic process                           | 6                   | 236                   | 1.27     | 0.00017              | GO:0005975 | Treh, Hexo1, Mdh1, Gld, tobi, Amy-p                                                              |
|       | malate metabolic process                                 | 2                   | 11                    | 2.12     | 0.0198               | GO:0006108 | Mdh1, Men                                                                                        |
|       | oxidation-reduction process                              | 6                   | 694                   | 0.8      | 0.0234               | GO:0055114 | Mdh1, Gld, Men, CG7737, PPO2, CG10638                                                            |
| GO:MF | hydrolase activity, hydrolyzing O-glycosyl compounds     | 5                   | 97                    | 1.58     | 0.0000201            | GO:0004553 | Treh, Hexo1, tobi, Amy-p, CG12582                                                                |
|       | catalytic activity                                       | 14                  | 3739                  | 0.44     | 0.00093              | GO:0003824 | Treh, Hexo1, Vha26, Mdh1, Gld, Men, CG4572, tobi, CG14516, Amy-p, CG7737, PPO2, CG10638, CG12582 |
|       | oxidoreductase activity                                  | 6                   | 598                   | 0.87     | 0.0024               | GO:0016491 | Mdh1, Gld, Men, CG7737, PPO2, CG10638                                                            |
|       | malate dehydrogenase activity                            | 2                   | 9                     | 2.21     | 0.0024               | GO:0016615 | Mdh1, Men                                                                                        |
|       | oxidoreductase activity, acting on CH-OH group of donors | 3                   | 81                    | 1.43     | 0.0031               | GO:0016614 | Mdh1, Gld, Men                                                                                   |
|       | hydrolase activity                                       | 8                   | 1685                  | 0.54     | 0.0143               | GO:0016787 | Treh, Hexo1, Vha26, CG4572, tobi, CG14516, Amy-p, CG12582                                        |

|                             |                                                                                       |    |      |      |            |             |                                                                   |
|-----------------------------|---------------------------------------------------------------------------------------|----|------|------|------------|-------------|-------------------------------------------------------------------|
|                             | oxidoreductase activity, acting on the CH-OH group of donors, NAD or NADP as acceptor | 2  | 53   | 1.44 | 0.0309     | GO:0016616  | Mdh1, Men                                                         |
| KEGG pathways               | Metabolic pathways                                                                    | 10 | 994  | 0.87 | 0.00000416 | dme01100    | Treh, Hexo1, Vha26, Mdh1, Gld, Men, tobi, CG14516, Amy-p, CG10638 |
|                             | Starch and sucrose metabolism                                                         | 3  | 33   | 1.82 | 0.00017    | dme00500    | Treh, tobi, Amy-p                                                 |
|                             | Lysosome                                                                              | 4  | 117  | 1.4  | 0.00017    | dme04142    | Hexo1, Npc2c, Tsp42Ea, CG12582                                    |
|                             | Other glycan degradation                                                              | 2  | 22   | 1.82 | 0.0027     | dme00511    | Hexo1, CG12582                                                    |
|                             | Galactose metabolism                                                                  | 2  | 37   | 1.6  | 0.0058     | dme00052    | tobi, CG10638                                                     |
|                             | Pyruvate metabolism                                                                   | 2  | 45   | 1.51 | 0.007      | dme00620    | Mdh1, Men                                                         |
|                             | Carbon metabolism                                                                     | 2  | 117  | 1.1  | 0.0369     | dme01200    | Mdh1, Men                                                         |
|                             | Significant in Young vs Mature                                                        |    |      |      |            |             |                                                                   |
| GO:BP                       | carbohydrate metabolic process                                                        | 4  | 236  | 1.37 | 0.0047     | GO:0005975  | Gld, tobi, Amy-d, Amy-p                                           |
| GO:MF                       | alpha-amylase activity                                                                | 2  | 2    | 3.14 | 0.00017    | GO:0004556  | Amy-d, Amy-p                                                      |
|                             | hydrolase activity, hydrolyzing O-glycosyl compounds                                  | 3  | 97   | 1.63 | 0.00086    | GO:0004553  | tobi, Amy-d, Amy-p                                                |
|                             | calcium ion binding                                                                   | 3  | 206  | 1.31 | 0.0046     | GO:0005509  | Amy-d, Amy-p, Cam                                                 |
|                             | ion binding                                                                           | 6  | 1993 | 0.62 | 0.0111     | GO:0043167  | DhpD, Gld, Amy-d, Amy-p, Rfabg, Cam                               |
|                             | hydrolase activity                                                                    | 5  | 1685 | 0.62 | 0.0343     | GO:0016787  | DhpD, tobi, Amy-d, Amy-p, cathD                                   |
|                             | metal ion binding                                                                     | 4  | 1027 | 0.73 | 0.0343     | GO:0046872  | DhpD, Amy-d, Amy-p, Cam                                           |
| KEGG                        | Starch and sucrose metabolism                                                         | 3  | 33   | 2.1  | 0.0000169  | dme00500    | tobi, Amy-d, Amy-p                                                |
|                             | Metabolic pathways                                                                    | 5  | 994  | 0.85 | 0.0016     | dme01100    | DhpD, Gld, tobi, Amy-d, Amy-p                                     |
| Significant in Field vs Lab |                                                                                       |    |      |      |            |             |                                                                   |
| GO:CC                       | extracellular space                                                                   | 6  | 454  | 0.96 | 0.0024     | GO:0005615  | CG3097, CG10433, Lsp1beta, CG4017, Lsp2, Sod                      |
|                             | larval serum protein complex                                                          | 2  | 4    | 2.54 | 0.0024     | GO:0005616  | Lsp1beta, Lsp2                                                    |
| Reactome                    | Complement cascade                                                                    | 2  | 20   | 1.84 | 0.0035     | DME-166658  | CG3097, CG4017                                                    |
|                             | Metabolism                                                                            | 5  | 833  | 0.62 | 0.0225     | DME-1430728 | Hexo2, Tai, LM408, CG16935, GstS1                                 |
| KEGG                        | Other glycan degradation                                                              | 2  | 22   | 1.8  | 0.0127     | dme00511    | Hexo2, LM408                                                      |
|                             | Lysosome                                                                              | 3  | 117  | 1.25 | 0.0127     | dme04142    | Hexo2, LM408, cathD                                               |
