# Supplementary material for: Biomarkers in a socially exchanged fluid reflect colony maturity, behavior, and distributed metabolism
Source: eLife. 2021 Nov 2;10:e74005. doi: 10.7554/eLife.74005 (PMC8608388; doi:10.7554/eLife.74005)
Supplement: Supplementary file 1. — Trophallactic fluid (TF) sampled for proteomics analysis. Date (field) indicates when the colony extract was collected from the field site, Date (TF sampling) indicates the date of the trophallactic fluid collection. Volume and ants indicate the volume collected and the number of ants collected from for each sample. The lab2019 colonies were used for single individual trophallactic fluid samples. For the two mature colonies that were sampled six times, * marks the sample that was used in the main datasets. [file elife-74005-supp1.xlsx]

## Sheet: Sampling scheme
	Supplemental File 1: The sampling scheme
	Trophallactic fluid (TF) sampled for proteomics analysis. Date (field) indicates when the colony extract was collected from the field site, Date (TF sampling) indicates the date of the trophallactic fluid collection. Volume and ants indicate the volume collected and the number of ants collected from for each sample. The lab2019 colonies were used for single individual trophallactic fluid samples.…
NestID	Sample ID	Island	Coordinates	Date (field)	Date (TF sampling)	Status	volume (µl)	ants
cflo20.02	FieldYoung2002	Fiesta	24.840091, -80.792447	2020-02-20	2020-02-20	young	5	23
cflo20.04	FieldYoung2004	Fiesta	24.840091, -80.792447	2020-02-20	2020-02-20	young	3	7
cflo20.07	FieldYoung2007	Sugarloaf	24.627298, -81.569617	2020-02-21	2020-02-21	young	3.3	7
cflo20.09	FieldYoung2009	Sugarloaf	24.627298, -81.569617	2020-02-21	2020-02-21	young	2.300	6
cflo20.11	FieldYoung2011	Tea Table	24.896367, -80.662087	2020-02-22	2020-02-22	young	2.8	6
cflo20.12	FieldYoung2012	Conch	24.786233, -80.896969	2020-02-22	2020-02-22	young	10	30
cflo20.14	FieldYoung2014	Duck	24.769611, -80.914853	2020-02-23	2020-02-23	young	6.7	18
cflo20.16	FieldYoung2016	Sugarloaf	24.627298, -81.569617	2020-02-24	2020-02-24	young	2.6	6
cflo20.18	FieldYoung2018	Sugarloaf	24.627298, -81.569617	2020-02-24	2020-02-24	young	5.3	15
cflo20.20	FieldYoung2020	Sugarloaf	24.627298, -81.569617	2020-02-25	2020-02-25	young	10	23
cflo20.21	FieldYoung2021	Sugarloaf	24.627298, -81.569617	2020-02-25	2020-02-25	young	6.6	12
cflo20.22	FieldYoung2022	Sugarloaf	24.627298, -81.569617	2020-02-25	2020-02-25	young	15	29
cflo20.23	FieldYoung2023	Sugarloaf	24.627298, -81.569617	2020-02-25	2020-02-25	young	6.6	9
cflo20.26	FieldYoung2026	Conch	24.786233, -80.896969	2020-02-28	2020-02-28	young	15.4	22
cflo20.27	FieldYoung2027	Conch	24.786233, -80.896969	2020-02-28	2020-02-28	young	10.2	15
cflo20.28	FieldYoung2028	Conch	24.786233, -80.896969	2020-02-28	2020-02-28	young	10	9
cflo20.29	FieldYoung2029	Conch	24.786233, -80.896969	2020-02-28	2020-02-28	young	3	8
cflo20.30	FieldYoung2030	Conch	24.786233, -80.896969	2020-02-28	2020-02-28	young	10	13
cflo20.33	FieldYoung2033	Conch	24.786233, -80.896969	2020-02-28	2020-02-28	young	10.9	16
cflo20.36	FieldYoung2036	Conch	24.786233, -80.896969	2020-02-28	2020-02-28	young	12	47
A	FieldMatA	Duck	24.769611, -80.914853	2020-02-19	2020-02-19	mature	>15	>30
AA	FieldMatAA	Conch	24.786233, -80.896969	2020-02-27	2020-02-27	mature	15.8	25
BB	FieldMatBB	Conch	24.786233, -80.896969	2020-02-27	2020-02-27	mature	19	21
F	FieldMatF	Duck	24.769611, -80.914853	2020-02-19	2020-02-19	mature	15	30
G	FieldMatG	Fiesta	24.840091, -80.792447	2020-02-20	2020-02-20	mature	>15	>30
H	FieldMatH	Fiesta	24.840091, -80.792447	2020-02-20	2020-02-20	mature	NA	12
I	FieldMatI	Fiesta	24.840091, -80.792447	2020-02-20	2020-02-20	mature	16	30
K	FieldMatK	Sugarloaf	24.627298, -81.569617	2020-02-21	2020-02-21	mature	15	30
L_Majors1	FieldMatLmaj1	Sugarloaf	24.627298, -81.569617	2020-02-21	2020-02-21	mature	>15	>30
L_Majors2	FieldMatLmaj2	Sugarloaf	24.627298, -81.569617	2020-02-21	2020-02-21	mature	>15	>30
L_Minors1*	FieldMatLmin1	Sugarloaf	24.627298, -81.569617	2020-02-21	2020-02-21	mature	>15	>30
L_Minors2	FieldMatLmin2	Sugarloaf	24.627298, -81.569617	2020-02-21	2020-02-21	mature	>15	>30
L_Nurses1	FieldMatLnur1	Sugarloaf	24.627298, -81.569617	2020-02-21	2020-02-21	mature	>15	>30
L_Nurses2	FieldMatLnur2	Sugarloaf	24.627298, -81.569617	2020-02-21	2020-02-21	mature	>15	>30
M	FieldMatM	Conch	24.786233, -80.896969	2020-02-22	2020-02-22	mature	15	40
N_Majors1	FieldMatNmaj1	Duck	24.769611, -80.914853	2020-02-23	2020-02-23	mature	17	35
N_Majors2	FieldMatNmaj2	Duck	24.769611, -80.914853	2020-02-23	2020-02-23	mature	15	30
N_Minors1*	FieldMatNmin1	Duck	24.769611, -80.914853	2020-02-23	2020-02-23	mature	15	35
N_Minors2	FieldMatNmin2	Duck	24.769611, -80.914853	2020-02-23	2020-02-23	mature	30	30
N_Nurses1	FieldMatNnur1	Duck	24.769611, -80.914853	2020-02-23	2020-02-23	mature	30	26
N_Nurses2	FieldMatNnur2	Duck	24.769611, -80.914853	2020-02-23	2020-02-23	mature	20	18
O	FieldMatO	Duck	24.769611, -80.914853	2020-02-23	2020-02-23	mature	21	20
P	FieldMatP	Duck	24.769611, -80.914853	2020-02-23	2020-02-23	mature	16	40
Q	FieldMatQ	Sugarloaf	24.627298, -81.569617	2020-02-24	2020-02-24	mature	15	>30
R	FieldMatR	Sugarloaf	24.627298, -81.569617	2020-02-24	2020-02-24	mature	20	100
S	FieldMatS	Sugarloaf	24.627298, -81.569617	2020-02-25	2020-02-25	mature	19.3	40
T	FieldMatT	Sugarloaf	24.627298, -81.569617	2020-02-25	2020-02-25	mature	16	15
U	FieldMatU	Sugarloaf	24.627298, -81.569617	2020-02-26	2020-02-26	mature	16.6	50
V	FieldMatV	Conch	24.786233, -80.896969	2020-02-27	2020-02-27	mature	20	15
W	FieldMatW	Conch	24.786233, -80.896969	2020-02-27	2020-02-27	mature	15	20
X	FieldMatX	Conch	24.786233, -80.896969	2020-02-27	2020-02-27	mature	21	21
Y	FieldMatY	Conch	24.786233, -80.896969	2020-02-27	2020-02-27	mature	15.3	22
Z	FieldMatZ	Conch	24.786233, -80.896969	2020-02-27	2020-02-27	mature	18	28
cflo20.11	LabYoung2011	Tea Table	24.896367, -80.662087	2020-02-22	2020-09-28	lab	5.1	24
cflo20.16	LabYoung2016	Sugarloaf	24.627298, -81.569617	2020-02-24	2020-09-28	lab	2.8	6
cflo20.14	LabYoung2014	Duck	24.769611, -80.914853	2020-02-23	2020-09-28	lab	10.1	41
cflo20.21	LabYoung2021	Sugarloaf	24.627298, -81.569617	2020-02-25	2020-09-29	lab	11	34
cflo20.07	LabYoung2007	Sugarloaf	24.627298, -81.569617	2020-02-21	2020-09-29	lab	13.4	38
cflo20.12	LabYoung2012	Conch	24.786233, -80.896969	2020-02-22	2020-09-29	lab	3.7	30
cflo20.34	LabYoung2034	Conch	24.786233, -80.896969	2020-02-28	2020-09-29	lab	4.8	24
cflo20.18	LabYoung2018	Sugarloaf	24.627298, -81.569617	2020-02-24	2020-09-29	lab	9.7	28
cflo20.30	LabYoung2030	Conch	24.786233, -80.896969	2020-02-28	2020-09-29	lab	3.4	22
cflo20.33	LabYoung2033	Conch	24.786233, -80.896969	2020-02-28	2020-09-29	lab	4.9	26
cflo20.02	LabYoung2002	Fiesta	24.840091, -80.792447	2020-02-20	2020-10-01	lab	13.2	31
cflo20.32	LabYoung2032	Conch	24.786233, -80.896969	2020-02-28	2020-10-01	lab	3.6	16
cflo20.26	LabYoung2026	Conch	24.786233, -80.896969	2020-02-28	2020-10-01	lab	10.1	32
cflo20.20	LabYoung2020	Sugarloaf	24.627298, -81.569617	2020-02-25	2020-10-01	lab	11.9	30
cflo20.27	LabYoung2027	Conch	24.786233, -80.896969	2020-02-28	2020-10-01	lab	10	35
cflo20.22	LabYoung2022	Sugarloaf	24.627298, -81.569617	2020-02-25	2020-10-01	lab	13.2	29
cflo19.032	LabSinInd22full	Fiesta	24.840091, -80.792447	2019-01-20	2020-09-28	lab2019	10	48
cflo19.032	LabSinIndNur22a	Fiesta	24.840091, -80.792447	2019-01-20	2020-09-28	lab2019	1	1
cflo19.032	LabSinIndNur22b	Fiesta	24.840091, -80.792447	2019-01-20	2020-09-28	lab2019	1	1
cflo19.032	LabSinIndNur22c	Fiesta	24.840091, -80.792447	2019-01-20	2020-09-28	lab2019	1.2	1
cflo19.032	LabSinIndNur22d	Fiesta	24.840091, -80.792447	2019-01-20	2020-09-28	lab2019	1.4	1
cflo19.032	LabSinIndNur22e	Fiesta	24.840091, -80.792447	2019-01-20	2020-09-28	lab2019	1.1	1
cflo19.032	LabSinIndFor22f	Fiesta	24.840091, -80.792447	2019-01-20	2020-09-28	lab2019	2.2	1
cflo19.032	LabSinIndFor22g	Fiesta	24.840091, -80.792447	2019-01-20	2020-09-28	lab2019	1.3	1
cflo19.032	LabSinIndFor22h	Fiesta	24.840091, -80.792447	2019-01-20	2020-09-28	lab2019	1.1	1
cflo19.032	LabSinIndFor22i	Fiesta	24.840091, -80.792447	2019-01-20	2020-09-28	lab2019	1.3	1
cflo19.032	LabSinIndFor22j	Fiesta	24.840091, -80.792447	2019-01-20	2020-09-28	lab2019	1.5	1
cflo19.038	LabSinInd23full	Fiesta	24.840091, -80.792447	2019-01-20	2020-09-28	lab2019	12.5	40
cflo19.038	LabSinIndNur23a	Fiesta	24.840091, -80.792447	2019-01-20	2020-09-28	lab2019	1.3	1
cflo19.038	LabSinIndNur23b	Fiesta	24.840091, -80.792447	2019-01-20	2020-09-28	lab2019	1	1
cflo19.038	LabSinIndNur23c	Fiesta	24.840091, -80.792447	2019-01-20	2020-09-28	lab2019	0.7	1
cflo19.038	LabSinIndNur23d	Fiesta	24.840091, -80.792447	2019-01-20	2020-09-28	lab2019	0.8	1
cflo19.038	LabSinIndNur23e	Fiesta	24.840091, -80.792447	2019-01-20	2020-09-28	lab2019	0.7	1
cflo19.038	LabSinIndFor23f	Fiesta	24.840091, -80.792447	2019-01-20	2020-09-28	lab2019	1.5	1
cflo19.038	LabSinIndFor23g	Fiesta	24.840091, -80.792447	2019-01-20	2020-09-28	lab2019	1	1
cflo19.038	LabSinIndFor23h	Fiesta	24.840091, -80.792447	2019-01-20	2020-09-28	lab2019	1.5	1
cflo19.038	LabSinIndFor23i	Fiesta	24.840091, -80.792447	2019-01-20	2020-09-28	lab2019	1.4	1
cflo19.038	LabSinIndFor23j	Fiesta	24.840091, -80.792447	2019-01-20	2020-09-28	lab2019	1.2	1
cflo19.004	LabSinInd25full	Fiesta	24.840091, -80.792447	2019-01-17	2020-09-28	lab2019	12	60
cflo19.004	LabSinIndNur25a	Fiesta	24.840091, -80.792447	2019-01-17	2020-09-28	lab2019	1	1
cflo19.004	LabSinIndNur25b	Fiesta	24.840091, -80.792447	2019-01-17	2020-09-28	lab2019	0.2	1
cflo19.004	LabSinIndNur25c	Fiesta	24.840091, -80.792447	2019-01-17	2020-09-28	lab2019	1.1	1
cflo19.004	LabSinIndNur25d	Fiesta	24.840091, -80.792447	2019-01-17	2020-09-28	lab2019	1.1	1
cflo19.004	LabSinIndNur25e	Fiesta	24.840091, -80.792447	2019-01-17	2020-09-28	lab2019	1	1
cflo19.004	LabSinIndFor25f	Fiesta	24.840091, -80.792447	2019-01-17	2020-09-28	lab2019	1	1
cflo19.004	LabSinIndFor25g	Fiesta	24.840091, -80.792447	2019-01-17	2020-09-28	lab2019	1.5	1
cflo19.004	LabSinIndFor25h	Fiesta	24.840091, -80.792447	2019-01-17	2020-09-28	lab2019	0.8	1
cflo19.004	LabSinIndFor25i	Fiesta	24.840091, -80.792447	2019-01-17	2020-09-28	lab2019	1.4	1
cflo19.004	LabSinIndFor25j	Fiesta	24.840091, -80.792447	2019-01-17	2020-09-28	lab2019	1.1	1
cflo19.025	LabSinInd26full	Sugarloaf	24.627298, -81.569617	2019-01-19	2020-09-28	lab2019	11.6	55
cflo19.025	LabSinIndNur26a	Sugarloaf	24.627298, -81.569617	2019-01-19	2020-09-28	lab2019	1	1
cflo19.025	LabSinIndNur26b	Sugarloaf	24.627298, -81.569617	2019-01-19	2020-09-28	lab2019	0.7	1
cflo19.025	LabSinIndNur26c	Sugarloaf	24.627298, -81.569617	2019-01-19	2020-09-28	lab2019	1.1	1
cflo19.025	LabSinIndNur26d	Sugarloaf	24.627298, -81.569617	2019-01-19	2020-09-28	lab2019	1.8	1
cflo19.025	LabSinIndNur26e	Sugarloaf	24.627298, -81.569617	2019-01-19	2020-09-28	lab2019	1.3	1
cflo19.025	LabSinIndFor26f	Sugarloaf	24.627298, -81.569617	2019-01-19	2020-09-28	lab2019	0.9	1
cflo19.025	LabSinIndFor26g	Sugarloaf	24.627298, -81.569617	2019-01-19	2020-09-28	lab2019	1.8	1
cflo19.025	LabSinIndFor26h	Sugarloaf	24.627298, -81.569617	2019-01-19	2020-09-28	lab2019	1.1	1
cflo19.025	LabSinIndFor26i	Sugarloaf	24.627298, -81.569617	2019-01-19	2020-09-28	lab2019	1.6	1
cflo19.025	LabSinIndFor26j	Sugarloaf	24.627298, -81.569617	2019-01-19	2020-09-28	lab2019	1.2	1
