# Supplementary material for: Biomarkers in a socially exchanged fluid reflect colony maturity, behavior, and distributed metabolism
Source: eLife. 2021 Nov 2;10:e74005. doi: 10.7554/eLife.74005 (PMC8608388; doi:10.7554/eLife.74005)
Supplement: Supplementary file 2. — This supplementary file combines into a single sheet the results and additional information for all of the significantly differing proteins in our four comparisons (Young vs. Mature, Nurse vs. Forager, Field vs. Lab, East vs. West), by all of the three statistical methods (classical, empirical Bayes, machine learning). Protein accession numbers, presence in colony and individual datasets, abundance when present, fold changes by comparison and significance both by comparison and by model are shared. [file elife-74005-supp2.xlsx]

## Sheet: Taul1
Supplemental file 2: All 135 significantly differing proteins
This supplemental file combines into a single sheet the results and additional information for all of the significantly differing proteins in our four comparisons (Young vs. Mature, Nurse vs. Forager, Field vs. Lab, East vs. West), by all of the three statistical methods (classical, empirical Bayes, machine learning). Protein accession numbers, presence in colony and individual datasets, abundanc…
id	Protein ID	Present colony (n=73)	Present indiv (n=40)	iBAQ average of valid values	iBAQ CV of valid values	Young vs mature log FoldChange	YvsM T-test sig	YvsM Limma sig	YvsM RF sig	Nurse vs forager log FoldChange	NvsF T-test sig	NvsF Limma sig	NvsF RF sig	Field vs lab log FoldChange	FvsL T-test sig	FvsL Limma sig	FvsL RF sig	North vs South log FoldChange	NvsS T-test sig	NvsS Limma sig	NvsS RF sig	Symbol	YM 2oo3	NF 2oo3	FL 2oo3
62	XP_025267081.1;XP_011269145.1;XP_011268884.1;E1ZUV1	59	29	1.45198e+06	3.59875	-0.937368				-0.445149			1	-0.278959				0.181366				V-type proton ATPase subunit C
96	E1ZWP8	66	18	1.91015e+07	1.40736	0.284958				0.548468				-2.74611	1	1	1	0.827071				Peptidase A1 domain-containing protein			1
102	XP_011258052.1;E1ZX35;E2ANB5;XP_011262825.1;E2ARN6;E2ARF2;XP_011262682.2;XP_011261161.2	70	36	5.01697e+07	3.39841	0.237047				0.510582				-2.69668		1	1	-1.06987				Ubiquitin-like domain-containing protein			1
114	XP_011260780.1;E1ZXJ7	69	32	6.45776e+06	3.31461	-1.29238			1	-2.17958	1	1	1	-1.69083				0.0274571				Tyrosinase_Cu-bd domain-containing protein		1
117	XP_019884091.1;E1ZXR7	57	30	5.90058e+07	3.19343	-1.08383				-3.31356		1		-2.27651	1	1		-1.10294				Zinc carboxypeptidase A 1			1
130	XP_011263402.1;E1ZY32	66	30	5.26011e+07	2.55597	-0.468554				-3.74291		1		0.222586				-0.251055				Uncharacterized protein
163	XP_011268522.1;E1ZZX0	69	37	1.08126e+07	1.66286	0.326424				-1.57569			1	-1.7109				-0.888941				ADP,ATP carrier protein 2
166	XP_025266889.1;E2A031	27	24	4.65221e+06	4.73831	-0.672319			1	0.718824				-0.560824				0.273698				Cytochrome b561 domain-containing protein
181	XP_011268873.1;XP_011268841.1;XP_011264343.1;XP_011264339.1;E2AUU5;E2AUU1;E2A0I8;XP_011252166.1;E2A633;E2AGF1;XP_011257651.1;XP_011257652.1	57	26	1.61236e+07	2.4712	-0.048727				-1.52248				-2.18517	1	1	1	-0.541361				Histone H2A			1
222	XP_011269703.1;XP_011269702.1;E2A252;XP_011257369.1;XP_011257368.1;XP_011257367.1;E2AFT7	72	40	3.6884e+07	1.4407	0.878216				-1.36472				0.11935	1			0.351457				Elongation factor 1-alpha
226	E2A2D8	30	29	5.10957e+06	3.96465	-0.455679				-3.52795		1	1	-0.903672				0.871424				Beta-mannosidase		1
273	E2A4U9;XP_019882208.1;XP_011251636.1;XP_011251639.2	57	28	2.82675e+06	1.16699	-1.43306	1		1	-0.156052				-0.0547272				1.03021				Guanine deaminase	1
275	XP_011251688.1;E2A4X8	71	40	3.103e+07	2.49876	-1.05322				-2.98269	1	1		-0.178976				0.0646856				Trehalase		1
277	E2A543;XP_025262620.1	54	21	1.75497e+07	3.28307	-0.972221				-2.28607		1		-3.20441		1	1	0.700434				Prostaglandin reductase 1			1
282	XP_011251922.1;XP_011251921.1;E2A5G4	44	37	8.38087e+06	2.50254	-1.18048				-2.3475		1		-0.392384				-0.545053				Chitin-binding type-2 domain-containing protein
288	E2A5R3;XP_011252033.1;XP_011252032.1;XP_011252034.1;XP_011252062.1	62	19	4.89292e+06	2.47139	-0.0075845				-1.20507				-0.829183	1			-0.895742				TPR_REGION domain-containing protein
291	XP_019882306.1;E2A5W9	69	37	1.79834e+08	2.97143	-0.236324				-1.07504				-1.24959				-2.22906		1		Peptidase S1 domain-containing protein
296	XP_011252204.1;E2A665	25	10	1.85245e+07	3.50316	0.292582				-2.12281		1		-0.262993				-0.752988				V-type proton ATPase subunit G
300	XP_011252301.1;E2A6C9	53	28	9.45692e+07	6.05169	-1.50502				0.747473				-2.00693		1		-1.23701				Protein G12
303	XP_011252356.1;E2A6I4	70	30	7.46209e+06	2.94458	0.288737				-1.32377				0.699779				-2.04068		1		Vacuolar ATP synthase catalytic subunit A
305	XP_011252428.1;E2A6N1;XP_025262425.1;XP_011252154.1;XP_011252142.1;E1ZVV0;E1ZVU9;XP_025262454.1;XP_025262453.1;XP_025262452.1;XP_025262451.1	71	24	3.06605e+07	2.42028	-0.239164				-3.69651		1	1	-1.66326				-1.45163				Tropomyosin-1		1
313	E2A6W8;XP_011252591.1	58	22	6.2261e+06	4.52358	-1.18933				-2.37994		1		-1.25881				0.149755				Folate gamma-glutamyl hydrolase
345	E2A8M5;XP_025269992.1	47	32	1.61513e+06	2.04998	-0.722622			1	-1.89276	1		1	-0.537383				0.21278				Amino_oxidase domain-containing protein		1
354	XP_011253679.1;E2A8Y6	61	26	1.2002e+08	3.16341	0.248778				-2.32069		1		-3.16286	1	1		-2.35866		1		Superoxide dismutase [Cu-Zn]			1
412	XP_011254740.1;E2AB19	45	27	3.39217e+06	2.21332	-1.18404				1.6827				-0.985862			1	-0.804181				Ribos_L4_asso_C domain-containing protein
423	E2ABI5	8	12	2.62136e+07	2.00267	0.0893945				-2.24758		1		0.896964				0.5865				Aamy domain-containing protein
428	E2ABN0;XP_011255042.2;XP_011255044.1;XP_011255043.1	50	26	6.63693e+06	6.45869	0.10979				1.29645				0.682733			1	0.359979				Apolipoprotein D
429	XP_025264071.1;XP_025264070.1;XP_011255071.1;E2ABP4	13	4	2.51464e+06	0.743299	1.07479				0.0560375				2.02434		1		0.475923				solute carrier organic anion transporter fami
432	XP_011255085.1;E2ABQ6	67	35	1.72378e+07	4.27306	-0.258026				-0.0485382				-0.615102				-2.39626		1		Glyceraldehyde-3-phosphate dehydrogenase
433	XP_011255135.2;E2ABV2	35	23	4.28702e+06	3.46731	0.239096				-1.88546			1	0.343714				0.605384				PKS_ER domain-containing protein
443	XP_011255282.1;E2AC27	73	40	2.66532e+09	1.02302	-1.46708			1	-2.01036		1		-0.700397			1	0.315269				GMC_OxRdtase_N domain-containing protein
444	XP_011255300.1;E2AC60	72	39	4.47654e+07	2.1628	0.00224229				-3.71707	1	1	1	-0.539388				-0.631688				Beta-hexosaminidase		1
447	E2AC94	65	37	4.35788e+07	6.61644	3.07712	1	1	1	1.7875	1			-1.5415				-1.42509				Hexamerin	1
457	XP_011255653.1;E2ACR9	46	8	3.56703e+07	1.9179	-2.90495	1	1	1	-1.9407				-4.69974		1	1	1.39459				Calmodulin	1		1
474	XP_011255976.2;E2ADD9	31	28	1.31814e+06	1.04041	0.621318				-1.00298			1	1.28599				0.654748				MFS domain-containing protein
481	XP_011256104.1;E2ADN0	54	28	2.50059e+07	3.92597	-0.633824				-0.241005				-1.09681				-2.19228		1		Malate dehydrogenase
490	XP_011256347.1;XP_011256346.1;E2ADZ5	39	17	5.42873e+07	2.68218	-0.987657				-2.56714		1		-2.17669		1		-1.09933				Calexcitin-2
521	XP_019883183.1;E2AEN9;XP_011256790.1	63	35	4.6263e+06	2.1154	-1.35011				-0.050647				-1.82951			1	1.197				Cuticlin-1
532	E2AFL0;XP_011257234.1;XP_011257235.1	57	16	3.3939e+07	3.80284	0.009737				-0.987184				-2.63519	1	1		-0.978885				Transaldolase			1
549	E2AGG0;XP_011257663.3	70	26	1.43342e+07	2.00713	1.29241				0.132138				-1.70696			1	-0.635987				Phospholipase B1, membrane-associated
558	E2AGQ0	50	12	5.18781e+06	1.51269	0.528188				-2.27992		1		-0.225671				-0.139738				SGL domain-containing protein
559	XP_011257803.1;E2AGQ1	51	8	6.55943e+06	1.57817	0.436817				0.438629				-1.69831			1	-0.745722				Plug_translocon domain-containing protein
597	E2AIX5;XP_025263124.1	73	40	2.63301e+08	1.34284	-0.700409				-2.43115		1		-1.02506				-0.389247				Maltase 1
599	XP_011258918.1;E2AIZ6	69	35	1.06534e+08	2.27232	-0.626222				-3.25904	1	1	1	-1.84154				-1.56943				ML domain-containing protein		1
608	E2AJ75;XP_011259035.1;XP_011259034.1;XP_011259042.1	55	6	1.76518e+06	3.17481	-0.578883				0.109135				-1.01473			1	0.167616				Pyruvate kinase
615	E2AJL8	73	36	4.6733e+07	1.41379	-1.17025			1	-2.75936		1		-0.836278				1.24376				Carboxylic ester hydrolase
628	XP_011259459.2;E2AJX6	61	33	1.26007e+07	5.36994	0.0429889				-2.84211		1		-0.965713				-0.654927				Catalase
632	E2AK03;XP_025267872.1	57	9	3.41335e+07	1.88897	1.05833				1.0491				-2.43747	1	1		-1.74028				Protein CREG1			1
633	E2AK04;XP_011259541.1	72	29	1.31768e+07	2.20114	-0.603441				-2.77809		1		-1.31908				-0.104746				Protein CREG1
641	XP_011259751.1;E2AKD6	63	32	9.19082e+07	3.06422	-0.702649				-2.82722		1		-1.59471				-0.891859				V-type proton ATPase proteolipid subunit
642	XP_025266940.1;XP_019883729.1;E2AKF6	62	34	4.39872e+06	2.90132	1.25385				1.43584				2.16463		1		0.638515				DOMON domain-containing protein CG14681
666	E2ALP2;XP_011260424.1	69	40	2.0167e+07	2.30969	-0.669366				-2.02449		1		-1.46759				-0.129019				Peptidase_M28 domain-containing protein
667	E2ALS8;XP_019883851.2	73	40	4.3195e+07	3.88416	-0.716216				-3.16582	1	1		-2.04008		1		-1.56597				Aminopeptidase N		1
678	XP_011260763.1;E2AMD6;XP_011260762.1	58	28	6.24279e+06	4.87511	-0.123219				-1.8299	1		1	-1.3713				0.26395				Malic enzyme		1
680	XP_025268061.1;XP_011260793.1;E2AMG4	38	17	1.03445e+07	4.35392	-0.812217				-2.06204		1		-1.74609				0.245204				Glutathione S-transferase 1-1
687	E2AMQ8;XP_025265046.1	20	11	1.03534e+07	2.24777	-0.292715				-2.04157		1		1.2602				0.859383				Lipase
714	XP_011261637.1;E2APC4	62	27	2.66001e+06	3.98276	-0.547109				-1.62023				-1.6264			1	1.24082				Myosin-IA
743	XP_011262417.1;E2AQX7;CON__ENSEMBL:ENSBTAP00000025008	53	38	4.23301e+06	1.92252	0.815154				2.02352	1			-0.0689022				-1.56699				Tubulin beta chain
758	XP_011262697.2;E2ARG4;E2A6I8;XP_011252363.1;XP_011252362.1	65	35	2.56721e+07	2.98422	0.154171				-1.68594				-2.62311	1	1		-1.21869				Beta-hexosaminidase			1
761	E2ARH9;XP_011262712.1	73	39	1.01793e+08	1.07598	-0.0141635				-1.8267				1.99978	1			1.33733				PA2c domain-containing protein
763	E2ARJ0;XP_011262743.2	65	35	6.97715e+06	2.87873	-2.2394	1	1		0.543016				-1.26274				-0.0328649				Guanine deaminase	1
773	XP_019884394.1;XP_011262974.1;E2ARX6	72	32	5.63407e+07	1.75519	-0.960462				-2.27003		1		-1.57373				-0.685422				Voltage-dependent anion-selective channel
790	XP_011263352.1;E2ASQ5	67	24	3.90615e+07	2.72818	1.44827			1	-0.668902				-2.32066		1	1	-0.378528				Uncharacterized protein			1
801	XP_025268062.1;XP_011263604.1;XP_011263603.1;XP_011263602.1;E2ATA4	5	1	3.34366e+06	1.11609	-0.228416				2.17326		1		0.367073				0.139019				Cystathionine beta-synthase
814	E2AU22;XP_019884578.2	58	29	3.03085e+07	5.11314	-0.0668709				-0.17183				-2.77243		1	1	-0.879924				Gamma-interferon-inducible lysosomal thiol reductase			1
847	XP_011264892.1;XP_011264890.1;E2AVV1	70	23	8.03216e+07	2.17983	-0.580703				-3.57453		1		-0.634238				-0.813354				Nucleoplasmin domain-containing protein
874	E2AX18;XP_011265519.1;XP_011265517.1	72	36	1.5097e+07	1.18828	1.41181				0.21275				3.66261	1	1	1	0.653012				Glutathione S-transferase			1
883	E2AXM8;XP_011265872.1	44	17	5.08577e+06	3.20153	1.14616			1	0.0800052				1.35142				-0.229196				Protein yellow
895	E2AY06;XP_011266013.1	66	29	1.95732e+07	3.4247	0.11349				-2.65394		1		-2.93092	1	1	1	-0.678768				Peptidase_M14 domain-containing protein			1
931	XP_011266818.1;E2AZK6;XP_011266817.1	72	29	7.29094e+06	1.51717	1.52346				-1.72286			1	1.45622				0.353362				Sulfatase domain-containing protein
943	XP_011267179.1;E2B0D3	68	27	1.4076e+07	2.26083	-1.04459				-3.05498		1	1	-1.52585				-0.416487				Protein FAM151A		1
950	E2B123;XP_025270483.1;XP_011267482.1	50	24	2.12005e+07	4.38425	-0.406801				-2.75897		1		0.351018				-0.668832				MFS domain-containing protein
951	XP_011267538.1;E2B155	46	21	9.65675e+06	5.65872	0.363132				-0.65026			1	0.173125				-0.353211				Angiotensin-converting enzyme
959	E2B1C8;XP_011267643.2	39	32	2.94328e+06	4.318	0.222474				-1.80923	1		1	-0.115608				0.308083				Malate dehydrogenase		1
974	E2B227;XP_011267964.1	69	32	6.74474e+07	2.57009	-0.170658				-4.52064	1	1	1	-0.133146				-0.577948				Tetraspanin		1
979	E2B271;XP_011268025.2	54	30	6.95744e+06	2.68662	1.15225				-2.11789		1		0.944604				-1.39467				Uncharacterized protein
1014	XP_011251109.1;E2A3W4	54	25	8.2599e+06	2.73667	0.449416				-2.39908		1		-0.12742				-0.886789				Vacuolar proton pump subunit d
1028	XP_011252309.2;E2A6E2	63	39	1.9416e+08	4.27677	-0.954295				-2.23944		1		1.74212	1			-2.30599		1		Protein G12
1031	XP_011252932.2;E2A7K7	73	40	1.2602e+08	3.47564	2.07296	1	1	1	-0.289128				-2.31222		1		-1.18392				Apolipophorins	1
1039	XP_011253495.1;E2A8P0	73	40	1.07622e+08	1.04784	-0.755531			1	0.606285				0.607054				0.786699				Deoxyribonuclease-2-alpha
1045	XP_011254133.1;E2A9W2	58	19	1.31795e+07	1.41572	-1.63882				-0.453457				-4.27754	1	1	1	1.32432				Thioredoxin domain-containing protein			1
1051	XP_011255281.1;E2AC28;E2AC29	65	40	4.04144e+07	1.42696	-4.82406	1	1	1	5.36448	1	1	1	-0.0593738				0.599104				GMC_OxRdtase_N domain-containing protein	1	1
1052	XP_011255318.1;XP_011255317.1;E2AC71	40	27	3.22775e+07	5.33516	-0.120813				1.10434				0.0954632				-1.29911		1		Aldose 1-epimerase
1054	XP_011255562.2	64	23	7.5057e+06	3.91193	0.368321				0.0630337			1	0.0846564				-0.0283496				peritrophin-48
1062	XP_011256323.1;XP_011256322.1;XP_011256321.1;E2ADY7;E2ADY5	29	34	2.52027e+06	3.03541	0.57116				-2.02128		1		-0.0197232				0.550256				Neutral ceramidase
1072	XP_011257736.2	67	31	2.0107e+07	2.27746	-0.877065				-0.0629688				-2.09507		1		-0.583933				leucine-rich repeat-containing G-protein coupled receptor 5-like
1076	XP_011257948.1;XP_011257947.1;XP_011257946.1;XP_011257945.1;E2AH19	41	4	3.3895e+06	1.3522	-1.40565				1.10959				-2.50621		1	1	0.85198				uncharacterized protein LOC105252319 isoform X4			1
1084	XP_011259278.2;E2AJM0;E2ANU0	73	39	2.33911e+08	1.13235	0.0265658				-2.20674		1		0.349803				-0.170216				COesterase domain-containing protein
1085	XP_011259279.2	72	40	1.87554e+07	1.23071	-1.85376			1	-1.4061				-1.26585				0.428195				venom carboxylesterase-6
1109	XP_025263304.1;XP_011263078.2	73	40	7.29268e+08	1.08778	-2.26358		1	1	0.830179	1			-0.00171551				0.767367				alpha-amylase	1
1120	XP_011263888.2;E2ATY3	55	19	7.26299e+06	2.3467	1.09282				-3.6667		1	1	0.41879				-0.817301				Vacuolar proton pump subunit E		1
1125	XP_011264385.1	58	32	1.29494e+06	2.97539	0.580024				1.107				-0.802464			1	-0.895024				multidrug resistance-associated protein 1 isoform X3
1134	XP_025265142.1;XP_011265088.2;E1ZV36	47	22	1.6671e+07	3.53472	0.191166				-3.65333		1		1.24264				-1.00269				MFS domain-containing protein
1136	XP_019884752.1;XP_011265107.1;E2AW51;E2AW54	11	21	2.8372e+06	5.10901	0.105647				1.15683			1	0.343777				0.423473				ZP domain-containing protein
1141	XP_011265525.1;E2AX16;E2AX15	47	20	2.6797e+06	4.06862	-0.0453088				-1.48908			1	-0.237387				-0.686428				Glutathione S-transferase
1142	XP_011265787.1;XP_011265786.1;XP_011265785.1;XP_011265784.1;XP_011265783.1;XP_011265782.1;XP_025264776.1;XP_025264775.1;XP_011265781.1;XP_011265779.1;XP_011265778.1;XP_011265776.1;E2AXI4;XP_019884889.1;XP_011265780.1	34	13	2.13881e+06	2.18056	0.0390803				-1.14843				2.65623		1		0.178123				troponin T
1144	XP_011266004.2	67	27	5.67523e+07	1.67574	-1.79013				-3.89696		1		-0.812908				0.858296				venom serine carboxypeptidase-like
1145	XP_011266010.1;E2AY02	73	40	6.39073e+08	1.15373	-1.04326			1	-3.21673	1	1		-1.25812			1	0.0729902				Carboxypeptidase		1
1146	XP_011266069.1;E2AY28	73	40	5.32414e+09	0.734809	-0.315251			1	0.20021				0.389767				0.653344				Uncharacterized protein
1152	XP_011266630.1;E2AZ60	73	40	5.63485e+08	1.05883	0.0306809				0.911098	1			-1.26814			1	1.03561				Peptidase A1 domain-containing protein
1163	XP_011267533.1;XP_011267532.1;XP_011267531.1;E2B153	73	40	5.41234e+07	2.72799	0.468659				-0.356822			1	-0.815847				-2.06599		1		actin-5, muscle-specific
1174	XP_011268594.2	69	28	1.99915e+07	3.31204	-1.17519				-3.15404		1		-2.14557		1		-0.846547				beta-galactosidase
1176	XP_011268722.1;XP_025270978.1;XP_025270976.1;E2A0C4;XP_025270977.1	35	20	3.76606e+06	2.23491	-0.216423				2.51675		1		-0.712462				0.440347				aldehyde dehydrogenase, dimeric NADP-preferri
1181	XP_011269026.3;E2A0U6	48	9	1.24699e+06	4.55224	0.0802189				0.581163				1.37949			1	-0.426327				N-acetylmuramoyl-L-alanine amidase
1188	XP_011269567.2;E2A1T1	46	24	1.35126e+07	3.62208	-0.497334				-2.07957		1		-0.766014				-0.889381				Fucosidase_C domain-containing protein
1193	XP_019882311.2;E2A631	73	40	2.72874e+08	0.979626	-0.322771			1	-0.763217				0.143089				0.462549				Ribonuclease Oy
1195	XP_025262946.1;XP_019882428.1;XP_019882427.1;XP_019882425.1;XP_019882423.1;XP_019882399.1;XP_019882376.1;XP_025262953.1;XP_025262951.1;XP_025262949.1;XP_025262945.1;XP_025262944.1;XP_025262943.1;XP_019882419.1;XP_019882418.1;XP_019882409.1;XP_019882401.1;XP_019882400.1;XP_019882398.1;XP_019882396.1;XP_019882393.1;XP_019882391.1;XP_019882383.1;XP_019882380.1;XP_019882377.1;XP_019882375.1;XP_025262…	73	40	1.25853e+07	2.35314	-0.614157				-2.4825		1		-2.18907		1		-1.6608				myosin heavy chain, muscle isoform X15
1198	XP_019882595.1;E2A8M9	63	21	5.65077e+07	2.27244	0.582999				-1.45681				-2.02605		1		-0.754054				Odorant receptor
1200	XP_025266198.1;XP_025266197.1;XP_025266196.1;XP_025266195.1;XP_019882760.2	51	9	356113	1.59646	0.856366				0.240125				0.880906			1	-0.0123646				myosin heavy chain, non-muscle isoform X5
1209	XP_019884420.2	72	40	3.07979e+07	1.41518	-1.49536			1	0.331279				0.167449				0.331738				alpha-amylase
1222	XP_025262246.1	73	39	157541560	1.38919	0.579428				-1.77108			1	0.285272				-0.318685				uncharacterized protein LOC105256493
1224	XP_025262495.1	47	8	1.17588e+07	1.79015	2.19966	1	1	1	0.402443				-0.994117				-0.382139				Pheromone-binding protein Gp-9-like	1
1236	XP_025262760.1;E2ATD2	73	39	4.75699e+08	0.982794	1.02114				-2.51501		1		-0.121008				0.643826				uncharacterized protein LOC105255829
1237	XP_025262778.1;XP_025262777.1;XP_025262798.1;E1ZXT8	40	34	2.4683e+06	3.88163	1.22763				1.80643	1			0.185843				-0.152539				glucose dehydrogenase [FAD, quinone]-like
1246	XP_025263096.1;XP_025263073.1;XP_025263075.1;E2B003	73	40	4.11918e+09	0.9162	-1.61863			1	0.65886				0.00868782				0.789686				Aamy domain-containing protein
1247	XP_025263076.1	73	40	4.45793e+08	1.27978	-0.458491				-2.17905		1		-0.697845				-0.279793				maltase 1-like
1248	XP_025263077.1	73	40	4.22556e+08	1.06364	-1.64101			1	-0.689174				-0.203211				0.252978				maltase 1-like
1253	XP_025263365.1	60	37	2.61522e+07	1.93561	-3.49773	1	1	1	3.53416	1	1		-0.853858				-0.555887				alpha-amylase	1	1
1264	XP_025264147.1	51	24	311188	2.01742	-0.103874				0.226905				2.47572		1		0.433716				uncharacterized protein LOC105250349
1269	XP_025264462.1;XP_025264460.1;XP_025264459.1;XP_025264457.1;XP_025264453.1;XP_025264446.1;E2AB22	32	23	4.84468e+06	5.03653	-0.443425				-2.77535		1	1	-0.128607				0.580638				1,5-anhydro-D-fructose reductase isoform X4		1
1273	XP_025264610.1	73	40	5.59027e+08	1.39039	-0.720925				-2.16769		1		-0.667261				1.7047				lysosomal aspartic protease isoform X1
1276	XP_025264718.1	69	31	2.6593e+08	6.39613	1.62851			1	1.11108				-2.79382	1	1		-0.810716				mediator of RNA polymerase II transcription subunit 12			1
1277	XP_025265088.1;E2AG27	36	12	5.00098e+07	4.03877	-0.488037				-2.08641		1		-0.217704				-0.591183				Thioredoxin domain-containing protein
1280	XP_025265137.1;E2ABS8	60	33	4.04553e+07	3.97989	-1.25819				-1.62186				-1.75039	1		1	-0.604491				Alpha-mann_mid domain-containing protein			1
1292	XP_025266319.1;E1ZXZ5;E2AC93	73	40	1.81861e+08	4.80291	1.83662			1	1.70543	1			-3.98331	1	1	1	-0.920575				Arylphorin subunit alpha			1
1300	XP_025267265.1;E1ZYQ6;E1ZYQ5	56	12	9.97624e+06	2.49001	-0.182584				-2.4365		1		-1.19369				-0.519608				Peptidase S1 domain-containing protein
1324	XP_025269121.1;E2A330	31	6	3.49351e+06	2.19952	-0.854548			1	0.546216				-0.955157				0.0310259				guanine deaminase
1325	XP_025269126.1	66	39	5.39943e+07	2.20986	-2.92039	1	1	1	-0.737949				-1.46052				-0.269679				Guanine deaminase	1
1327	XP_025269141.1	29	17	1.39869e+06	2.22458	0.635355				2.76387		1		0.591241				0.340554				guanine deaminase
1342	XP_025269485.1;XP_025269481.1;E2A1Y6	73	40	1.80054e+08	1.29581	-3.04218	1	1	1	2.55282	1	1	1	-0.677468			1	-0.148608				tobi-like	1	1
1343	XP_025269493.1	26	16	988294	3.38896	0.0835258			1	0.993301				-0.327973				0.491452				tobi-like
1347	XP_025269663.1;XP_025269662.1;XP_025269661.1;XP_025269660.1;E2A1Z0;XP_025269664.1	50	21	283799	1.53256	0.859408			1	0.440302				1.24786				0.227813				putative glutamate synthase [NADPH] isoform X2
1358	XP_025269812.1	72	40	2.07872e+08	1.63284	0.773406				-3.53528	1	1	1	-1.39777				0.195318				serine protease inhibitor 3/4 isoform X12		1
1367	XP_025270291.1;E2AAT8	55	37	1.92205e+06	2.47018	-1.04361				1.24649	1			-2.16133		1	1	-0.363955				ATP synthase subunit alpha, mitochondrial			1
1368	XP_025270599.1;XP_025270598.1;E1ZY72	46	15	1.38976e+06	1.45923	-0.442909				0.118377				-0.0767206			1	0.363834				Transket_pyr domain-containing protein
