# Supplementary material for: Biomarkers in a socially exchanged fluid reflect colony maturity, behavior, and distributed metabolism
Source: eLife. 2021 Nov 2;10:e74005. doi: 10.7554/eLife.74005 (PMC8608388; doi:10.7554/eLife.74005)
Supplement: Supplementary file 3. — Statistical results for the classical frequentist models; the imputed data are also shared. [file elife-74005-supp3.xlsx]

## Sheet: Legend
Supplemental file 3: Full frequentist statistical results
These supplemental files share the full results of all the models run. For the classical frequentist models (Supplemental File 3), the imputed data are also shared. For the empirical Bayes LIMMA models (Supplemental File 4) results are shared as raw output tables. Accuracy, seed, and mean feature importances for each gene are reported for each model trained for the random forest analyses in Suppl…

## Sheet: North vs. south Studet's T test
id	Protein IDs	Significant	-Log p-value	q-value	Difference	Test statistic	Fasta headers	FieldMatA	FieldMatAA	FieldMatBB	FieldMatF_rep	FieldMatG	FieldMatH	FieldMatI	FieldMatK	FieldMatLmin1	FieldMatM	FieldMatNmin1	FieldMatO_rep	FieldMatP_rep	FieldMatQ	FieldMatR	FieldMatS	FieldMatT	FieldMatU	FieldMatV	FieldMatW	FieldMatX	FieldMatY_rep	FieldMatZ	FieldYoung2002	FieldYoung2004	FieldYoung2007	FieldYoung2009	FieldYoung2011	FieldYoung2012	FieldYoung2014	FieldYoung2016	FieldYoung2018	FieldYoung2020	FieldYoung2021	FieldYoung2022	FieldYoung2023	FieldYoung2026	FieldYoung2027	FieldYoung2028	FieldYoung2029	FieldYoung2030	FieldYoung2033
62	XP_025267081.1;XP_011269145.1;XP_011268884.1;E1ZUV1		0.569785	0.491146	0.986793	0.342498	tr|E1ZUV1|E1ZUV1_CAMFO V-type proton ATPase su	-6.20437145233154	-3.24534034729004	-4.27644729614258	-1.5152416229248	-4.96738433837891	-1.1004524230957	-4.04530715942383	-6.81097984313965	-10.9051189422607	-1.19145393371582	-3.46723556518555	-6.39653587341309	-4.37990760803223	-7.49987268447876	-4.58218193054199	-2.55719089508057	-0.297679901123047	-3.28467178344727	-10.8713397979736	-3.9875955581665	-2.87276458740234	-3.06661796569824	-1.57509994506836	-3.96560668945313	0.522958755493164	-1.19612121582031	-1.9811840057373	-1.59236717224121	-2.70737552642822	-3.23925018310547	-3.5260009765625	-9.34571743011475	-4.30763244628906	-3.3174524307251	-9.3848934173584	-1.69120216369629	-2.4514217376709	-4.28506088256836	-1.14837551116943	-8.62577724456787	-6.97784948348999	-3.38466835021973
96	E1ZWP8		1.17266	0.3712	-1.2695	-0.474545	tr|E1ZWP8|E1ZWP8_CAMFO Peptidase A1 domain-containing protein OS=Camponotus floridanus (Florida carpenter ant) OX=104421 GN=EAG_09731 PE=3 SV=1	0.480410575866699	0.692209243774414	2.08905601501465	3.21528434753418	1.22220420837402	4.20165061950684	4.94692993164063	5.14056205749512	3.3698148727417	2.67848014831543	0.357635498046875	-4.65371894836426	-2.01517677307129	4.46955490112305	4.88630867004395	2.11974239349365	4.47177696228027	2.23524856567383	0.894582748413086	1.15738964080811	1.6030330657959	0.835393905639648	2.19998931884766	2.43371772766113	3.6453742980957	1.32203674316406	1.85797882080078	-4.18034553527832	1.92867183685303	2.77059555053711	0.382736206054688	1.92935562133789	1.35535621643066	3.00541973114014	1.13255405426025	2.23427200317383	1.54916954040527	2.01052856445313	-2.23601818084717	2.43994045257568	4.50613880157471	-0.00464248657226563
102	XP_011258052.1;E1ZX35;E2ANB5;XP_011262825.1;E2ARN6;E2ARF2;XP_011262682.2;XP_011261161.2		0.966381	0.405667	1.22991	0.447465	tr|E1ZX35|E1ZX35_CAMFO Ubiquitin-like domain-containing protein OS=Camponotus floridanus (Florida carpenter ant) OX=104421 GN=EAG_06521 PE=4 SV=1;tr|E2ANB5|E2ANB5_CAMFO Ubiquitin OS	-0.108805656433105	3.86492347717285	3.16720199584961	1.14257049560547	2.48089027404785	1.66110229492188	3.95177841186523	1.3681468963623	2.1920862197876	2.23746490478516	2.7949333190918	2.89929580688477	1.11938858032227	1.66650009155273	1.91868019104004	3.39995670318604	3.31114768981934	3.40728759765625	1.83932113647461	2.82571506500244	3.54248428344727	-0.54852294921875	5.07224082946777	1.87525367736816	3.7978572845459	0.95744514465332	2.43570899963379	2.72367286682129	3.33864498138428	3.29519653320313	2.25027847290039	-11.319037437439	1.57639694213867	2.99065685272217	1.42468166351318	1.75684928894043	1.67230415344238	3.87323379516602	4.02940464019775	0.630063056945801	2.33988285064697	2.2879467010498
114	XP_011260780.1;E1ZXJ7		0.238815	0.776857	-0.473687	-0.166645	tr|E1ZXJ7|E1ZXJ7_CAMFO Tyrosinase_Cu-bd domain-containing protein OS=Camponotus floridanus (Florida carpenter ant) OX=104421 GN=EAG_04466 PE=4 SV=1	-5.3989896774292	-2.27441024780273	-1.87072563171387	3.85415649414063	-3.43024253845215	-5.38293695449829	-3.54523277282715	0.70036506652832	-1.79569530487061	-1.69165992736816	-3.48927688598633	0.93031120300293	-1.82907867431641	-2.95070648193359	0.0975570678710938	-2.68683338165283	-8.23139190673828	-5.7149829864502	-2.71532821655273	-4.91753482818604	-2.52360916137695	-2.63752937316895	-6.12070274353027	-2.2159595489502	0.284700393676758	0.196632385253906	0.867538452148438	-1.29946708679199	0.354022026062012	-2.65086936950684	-6.98571586608887	1.58696746826172	1.01055145263672	-1.55424785614014	-0.381623268127441	0.139188766479492	-2.24992561340332	-2.6524829864502	-0.107169151306152	-6.79848575592041	0.869355201721191	-2.35938835144043
117	XP_019884091.1;E1ZXR7		1.34939	0.142182	2.31998	0.743481	tr|E1ZXR7|E1ZXR7_CAMFO Zinc carboxypeptidase A 1 OS=Camponotus floridanus (Florida carpenter ant) OX=104421 GN=EAG_14623 PE=4 SV=1	2.15918445587158	0.902824401855469	0.774116516113281	-2.40602493286133	2.2165641784668	-0.804443359375	-3.59701156616211	-8.3264684677124	-1.04710292816162	-1.00718879699707	1.09238433837891	1.25005340576172	3.65189552307129	-1.06561088562012	-8.1265869140625	-1.59073352813721	-9.68574905395508	3.63289642333984	-5.8436222076416	3.18412303924561	1.57713890075684	-6.68248224258423	-0.473878860473633	-0.294918060302734	-0.634727478027344	-3.23205375671387	-8.07546997070313	3.69185447692871	-0.838858604431152	-3.54052925109863	2.94228363037109	0.619085311889648	0.270458221435547	-1.11308193206787	1.97354221343994	3.09601211547852	3.59031677246094	1.90837287902832	3.82845020294189	3.22399425506592	-0.508498191833496	3.14287185668945
130	XP_011263402.1;E1ZY32		0.00183824	1	-0.00585504	-0.00188914	tr|E1ZY32|E1ZY32_CAMFO Uncharacterized protein OS=Camponotus floridanus (Florida carpenter ant) OX=104421 GN=EAG_09984 PE=4 SV=1	0.149544715881348	-1.1628303527832	1.24501800537109	1.12123107910156	-1.21512031555176	-6.46709537506104	1.55197715759277	-9.50611305236816	0.632956504821777	0.0818862915039063	2.57495498657227	2.37051582336426	0.870494842529297	-7.91941738128662	0.565185546875	3.11627101898193	1.26628303527832	2.78208160400391	1.68118286132813	1.35906505584717	0.544792175292969	2.96867942810059	2.78253936767578	1.63947677612305	-0.657051086425781	2.03523254394531	1.53516387939453	0.749078750610352	2.75586795806885	-0.118459701538086	3.24570465087891	1.79399871826172	-1.34980392456055	3.08238124847412	1.99426746368408	1.48764610290527	1.5738410949707	2.59021759033203	3.38194179534912	-9.60384750366211	-7.85098838806152	1.68025207519531
157	XP_011268452.1;E1ZZT0		3.15308	0.06	3.38037	1.15674	tr|E1ZZT0|E1ZZT0_CAMFO Calreticulin OS=Camponotus floridanus (Florida carpenter ant) OX=104421 GN=EAG_13074 PE=3 SV=1	1.088791847229	1.32720184326172	-0.684213638305664	1.22966575622559	-0.857669830322266	-3.44220542907715	-2.7274112701416	-7.1328182220459	-7.82642221450806	-1.05666542053223	-2.43704795837402	-5.75653457641602	-0.730783462524414	-7.07898283004761	-4.60412979125977	-1.77163982391357	-2.92269515991211	1.44598388671875	-6.54892206192017	0.69212818145752	2.37265205383301	-5.54572725296021	0.353946685791016	-0.140928268432617	-3.474609375	-0.371076583862305	-2.31526756286621	-0.446918487548828	-0.859686851501465	0.196878433227539	-1.09078598022461	-8.56039428710938	-9.67901611328125	-7.0295033454895	-7.72699928283691	-7.36341238021851	-2.7397632598877	-3.13700294494629	-1.35125637054443	-7.77609872817993	-0.656371116638184	0.380226135253906
163	XP_011268522.1;E1ZZX0		0.588253	0.744878	0.436127	0.183226	tr|E1ZZX0|E1ZZX0_CAMFO ADP,ATP carrier protein 2 OS=Camponotus floridanus (Florida carpenter ant) OX=104421 GN=EAG_16360 PE=3 SV=1	1.04661846160889	0.949710845947266	1.6301383972168	1.28336524963379	0.189062118530273	1.44617080688477	1.17093276977539	1.06411361694336	-0.521481513977051	1.15770149230957	0.116355895996094	-1.36028861999512	-0.0861282348632813	1.2358341217041	0.597219467163086	3.37825107574463	2.41530990600586	0.810979843139648	-0.277400970458984	1.01908397674561	1.3518238067627	0.30003547668457	1.35037422180176	2.02340888977051	1.33041763305664	-0.235130310058594	1.47549629211426	0.567045211791992	1.14136409759521	0.340005874633789	0.531599044799805	-3.84599494934082	0.410793304443359	-0.404202461242676	-0.224221229553223	-0.896839141845703	-0.325284957885742	1.97226333618164	-0.0609712600708008	-0.274991035461426	1.81066799163818	0.766529083251953
179	E2A0I0;XP_011268828.1;XP_011268827.1		0.319679	0.702891	0.574053	0.204766	tr|E2A0I0|E2A0I0_CAMFO Gal_mutarotas_2 domain-containing protein OS=Camponotus floridanus (Florida carpenter ant) OX=104421 GN=EAG_11174 PE=3 SV=1;|XP_011268827.1 neutral alpha-g	-2.11171817779541	-1.86338233947754	-3.7461051940918	-1.62906646728516	-8.01730537414551	-0.132577896118164	-4.98359298706055	-2.11068916320801	-7.44918823242188	-0.797374725341797	-5.02798461914063	-4.61518478393555	-5.34754943847656	-0.723060607910156	-2.84668922424316	-1.90690135955811	0.611295700073242	-1.75371551513672	-3.68067169189453	-2.69246006011963	-1.54145240783691	-3.38557624816895	-8.27909851074219	-4.62443923950195	-0.597629547119141	-3.78940773010254	-8.04178619384766	-1.06926536560059	-0.0927000045776367	-0.0211811065673828	-3.21740531921387	-2.45672225952148	-2.88710594177246	-9.02009963989258	-0.776686668395996	-6.94815063476563	-2.69143867492676	-1.37557983398438	-2.17517185211182	-6.61478137969971	-2.65858364105225	-1.83633422851563
180	XP_011268843.1;XP_011265835.1;XP_011264345.1;XP_011264342.1;E2AUU4;E2A0I7		0.108334	0.879732	0.255421	0.0879187	tr|E2AUU4|E2AUU4_CAMFO Histone H2B OS=Camponotus flo	0.166279792785645	1.4564094543457	3.48622894287109	1.20563697814941	-0.360218048095703	1.22389030456543	-7.46854877471924	1.37180709838867	-8.28287029266357	0.39488410949707	-1.5632152557373	0.419282913208008	-0.0272102355957031	-0.906206130981445	-0.645923614501953	0.531340599060059	2.75104522705078	-0.126556396484375	0.143125534057617	-0.245722770690918	1.72919845581055	-0.0849571228027344	-0.11918830871582	-1.67960548400879	0.751873016357422	0	-0.402637481689453	1.72418785095215	-5.02290296554565	-0.429380416870117	1.16144943237305	-0.795576095581055	0.219575881958008	-5.43045473098755	-6.40684223175049	0.186834335327148	-4.9047966003418	-1.22175216674805	-3.37821102142334	-0.701613426208496	0.763415336608887	-2.73280334472656
181	XP_011268873.1;XP_011268841.1;XP_011264343.1;XP_011264339.1;E2AUU5;E2AUU1;E2A0I8;XP_011252166.1;E2A633;E2AGF1;XP_011257651.1;XP_011257652.1		0.400969	0.568943	0.819746	0.277114	tr|E2AUU5|E2AUU5_CAMFO Histone H2A OS=Camponotus flo	2.32467174530029	0.512458801269531	2.79076385498047	1.25591659545898	-0.894935607910156	-8.1112585067749	1.02744483947754	-8.61172676086426	0.505631446838379	0.265239715576172	-1.3566951751709	1.40452003479004	1.5706729888916	-1.52616119384766	-0.0518169403076172	0.238129615783691	2.50510597229004	-0.558755874633789	0.217220306396484	-0.628535270690918	1.15572166442871	1.65431213378906	-0.807575225830078	-7.33991527557373	2.42299842834473	1.1443977355957	1.96005058288574	1.68394470214844	1.19117641448975	0.513065338134766	1.7619571685791	-0.693626403808594	2.18353652954102	-10.2939863204956	-1.30852222442627	1.70337295532227	-0.20936393737793	-0.238275527954102	-1.89969539642334	0.428896903991699	2.17953395843506	0.0504016876220703
182	XP_011268846.1;XP_011265836.1;XP_011264341.1;E2A0J1		0.0511671	0.985006	0.057791	0.02397	tr|E2A0J1|E2A0J1_CAMFO Histone H4 OS=Camponotus floridanus (Florida carpenter ant) OX=104421 GN=EAG_09814	3.01476573944092	2.9175968170166	5.23216819763184	4.12421607971191	2.64232063293457	2.93095970153809	2.93975830078125	4.02592849731445	2.71524524688721	2.12152481079102	0.772304534912109	1.12273216247559	2.4323902130127	3.01501274108887	1.58041954040527	3.96228313446045	3.40484619140625	3.413818359375	3.39513397216797	1.80466938018799	3.1484203338623	2.99374008178711	2.66571235656738	2.1908073425293	4.22969055175781	1.46646690368652	3.68255424499512	2.35798263549805	3.47035694122314	1.24176216125488	3.34482192993164	1.07835578918457	3.65058517456055	-1.40521907806396	0.808609962463379	4.10835647583008	2.12301826477051	2.67836380004883	0.99448299407959	0.640191078186035	4.51431560516357	2.37731170654297
222	XP_011269703.1;XP_011269702.1;E2A252;XP_011257369.1;XP_011257368.1;XP_011257367.1;E2AFT7		0.239053	0.744774	-0.533802	-0.181034	tr|E2A252|E2A252_CAMFO Elongation factor 1-alpha OS=Camponotus floridanus (Florida carpenter ant) OX=104421 GN=EAG_13423 PE=3	0.768036842346191	4.08086776733398	5.08976936340332	1.49383926391602	0.715936660766602	5.22136497497559	1.95299911499023	5.9376163482666	0.578736305236816	5.14226150512695	-0.549116134643555	2.23728942871094	-0.11125373840332	-2.10193824768066	4.43898010253906	1.34645175933838	6.8813533782959	4.9355640411377	1.00238990783691	0.480561256408691	4.06258010864258	0.0388984680175781	0.285266876220703	0.879978179931641	5.07079315185547	4.47510528564453	5.08641624450684	-0.176862716674805	1.19533252716064	-0.627664566040039	2.97907066345215	-7.23304748535156	5.17242240905762	-3.40666675567627	-2.40170764923096	5.10017013549805	-0.391214370727539	0.615909576416016	0.164139747619629	5.67374897003174	-0.00707721710205078	0.0899906158447266
236	XP_011250693.1;E2A358		0.785674	0.409742	1.27316	0.439326	tr|E2A358|E2A358_CAMFO SERPIN domain-containing protein OS=Camponotus floridanus (Florida carpenter ant) OX=104421 GN=EAG_01413 PE=3 SV=1	-6.14215040206909	-3.66512870788574	-0.983119964599609	-1.67129898071289	-6.19799327850342	-2.97919464111328	-1.1911735534668	-8.54504299163818	-1.56072330474854	-0.729288101196289	1.16155815124512	1.55390548706055	-3.38685607910156	-6.76948642730713	2.12310600280762	-7.80940723419189	-1.43346214294434	-3.43549156188965	-4.94692420959473	-5.2588586807251	-5.92555236816406	-3.86534309387207	-4.20549201965332	-2.90287590026855	-2.6436710357666	-2.28352737426758	-1.54018211364746	-2.7684383392334	-0.922820091247559	-3.54935455322266	-3.76375198364258	-10.4738550186157	-6.43046092987061	-9.27964878082275	-5.97873258590698	-2.80768394470215	-3.23551177978516	-3.76790237426758	-1.37901592254639	-7.02802658081055	-7.16208076477051	-4.42074966430664
240	E2A3I0;XP_011250877.1;XP_011250876.1;XP_011250875.1;XP_011250874.1		1.5836	0.197935	1.82534	0.654083	tr|E2A3I0|E2A3I0_CAMFO 14_3_3 domain-containing protein OS=Camponotus floridanus (Florida carpenter ant) OX=104421 GN=EAG_13996 PE=3 SV=1;|XP_011250876.1 14-3-3 protein zeta isoform X3 [C	-0.918400764465332	-1.30239677429199	-2.24719429016113	-0.281272888183594	-3.55136299133301	-1.8570556640625	-1.71659278869629	-1.77775955200195	-8.57277774810791	-6.55848217010498	-3.95398902893066	-2.19442749023438	-2.49533081054688	-2.35510063171387	-1.99114608764648	-2.44596767425537	-8.48251438140869	-7.78689956665039	-2.03029441833496	-4.20424365997314	-3.20553779602051	-8.81742668151855	-1.56752967834473	-1.31253814697266	-9.08533668518066	-7.35249853134155	-3.73969268798828	-2.24056434631348	-1.48078060150146	-1.33133125305176	-3.07434844970703	-4.47927856445313	-3.68468856811523	-2.41066455841064	-2.17680263519287	-8.45597553253174	-1.91199493408203	-2.08703231811523	-0.783074378967285	-6.85955095291138	-1.23328113555908	-1.01412010192871
273	E2A4U9;XP_019882208.1;XP_011251636.1;XP_011251639.2		0.574064	0.418108	-1.26395	-0.404806	tr|E2A4U9|E2A4U9_CAMFO Guanine deaminase OS=Camponotus floridanus (Florida carpenter ant) OX=104421 GN=EAG_04593 PE=4 SV=1	-7.49688386917114	-4.12503242492676	-3.78182792663574	-5.33008575439453	-7.32201766967773	-6.21484661102295	-9.19250392913818	-7.57134532928467	-10.8776760101318	0	-1.94461059570313	-7.78263473510742	-2.47731399536133	-1.8416690826416	-4.90419960021973	-0.654248237609863	-1.29787826538086	-0.990566253662109	-7.85837125778198	-0.311501502990723	-3.60289573669434	0.157848358154297	-1.56839561462402	-0.262144088745117	1.6225757598877	0.568902969360352	0.896066665649414	-9.30169677734375	-1.39207553863525	1.66486358642578	-3.91330146789551	0.981277465820313	1.31475257873535	1.51464176177979	-2.19029712677002	0.689233779907227	-3.28180694580078	-1.09380722045898	-7.09529542922974	1.70616245269775	-0.0835447311401367	-1.69896507263184
275	XP_011251688.1;E2A4X8		0.31252	0.697433	0.577802	0.20463	tr|E2A4X8|E2A4X8_CAMFO Trehalase OS=Camponotus floridanus (Florida carpenter ant) OX=104421 GN=EAG_13710 PE=3 SV=1	0.017186164855957	0.383138656616211	1.03337860107422	-0.805931091308594	1.83601570129395	-2.61654663085938	1.59245109558105	-7.95817470550537	-0.81914234161377	-0.188327789306641	2.61615562438965	1.72610855102539	0.619003295898438	-10.9275674819946	2.59474182128906	1.20913982391357	-1.33543968200684	0.82548713684082	-4.19889068603516	0.748675346374512	-0.692556381225586	-1.40935134887695	0.620635986328125	0.00782394409179688	0.143125534057617	0.593631744384766	0.913148880004883	-0.176748275756836	0.0367326736450195	0.457914352416992	0.73267936706543	1.4127197265625	0.816627502441406	1.45573329925537	0.95424747467041	4.11926078796387	0.316703796386719	0.8377685546875	2.70846462249756	-0.120104789733887	0.727967262268066	-0.975629806518555
277	E2A543;XP_025262620.1		1.02449	0.246545	-1.9267	-0.616418	tr|E2A543|E2A543_CAMFO Prostaglandin reductase 1 OS=Camponotus floridanus (Florida carpenter ant) OX=104421 GN=EAG_03035 PE=4 SV=1;|XP_025262620.1 prostaglandin reductase 1 [Camponotus floridanus]	-0.129551887512207	0.0459842681884766	-3.39631462097168	-2.30021095275879	-6.76771783828735	3.21858406066895	-2.5351448059082	5.80697822570801	-10.0145654678345	-6.40178155899048	-0.272979736328125	-0.478916168212891	-0.0879802703857422	3.27635192871094	1.74188804626465	0.614426612854004	-1.88855361938477	0.353376388549805	-8.01745414733887	0.277058601379395	-0.771158218383789	-7.80546379089355	0.724187850952148	-2.53057098388672	-8.2157735824585	1.15033912658691	0.368503570556641	0.00537681579589844	1.22852802276611	1.30224418640137	0.0377635955810547	1.0008659362793	0.197917938232422	2.05938625335693	0.487654685974121	-0.0474872589111328	0.941768646240234	2.40836143493652	2.35009288787842	-9.08894538879395	0.781743049621582	0.253881454467773
288	E2A5R3;XP_011252033.1;XP_011252032.1;XP_011252034.1;XP_011252062.1		0.880614	0.434169	0.999971	0.377345	tr|E2A5R3|E2A5R3_CAMFO TPR_REGION domain-containing protein OS=Camponotus floridanus (Florida carpenter ant) OX=104421 GN=EAG_13367 PE=4 SV=1;|XP_011252032.1 uncharacteri	-0.520586967468262	-0.261882781982422	-1.86112976074219	0.0563240051269531	-1.82154273986816	-0.867887496948242	-1.53495407104492	-8.00323390960693	-3.10682964324951	-2.39285278320313	-1.80519866943359	-0.53125	-0.611030578613281	-1.9338436126709	-1.5399341583252	-2.1889009475708	-6.86102151870728	-2.29220199584961	-2.89061546325684	-3.03197956085205	-0.738344192504883	-10.9746580123901	-2.64583778381348	-1.02022933959961	-1.59307670593262	-2.20792770385742	-2.07133865356445	-1.03744888305664	-0.065159797668457	-0.902484893798828	-1.23835563659668	-1.99777793884277	-3.59895133972168	-1.16632175445557	-1.2496919631958	-1.37177276611328	-2.22393608093262	-2.58880615234375	-0.223223686218262	-1.56223964691162	-1.42306041717529	-0.571723937988281
291	XP_019882306.1;E2A5W9		1.79605	0.1388	2.18141	0.760596	tr|E2A5W9|E2A5W9_CAMFO Peptidase S1 domain-containing protein OS=Camponotus floridanus (Florida carpenter ant) OX=104421 GN=EAG_05387 PE=3 SV=1	5.30535984039307	2.90095520019531	3.86090850830078	0.428291320800781	3.83069801330566	-0.90257453918457	-1.81749153137207	-7.43607616424561	1.03930568695068	2.17544174194336	3.32340049743652	3.34168434143066	5.72708129882813	-0.770059585571289	-1.3375415802002	0.781521797180176	-0.582782745361328	5.46863174438477	-0.963201522827148	4.92672634124756	4.11704254150391	1.75116348266602	1.89575576782227	1.02132034301758	-2.15674018859863	-2.86172103881836	-1.92328262329102	5.52800369262695	0.889519691467285	-0.639883041381836	5.07596778869629	0.35197639465332	2.97987365722656	-0.846871376037598	2.74250316619873	2.50854873657227	5.44878768920898	2.53271293640137	5.15712451934814	4.9539270401001	1.17369556427002	4.5545711517334
300	XP_011252301.1;E2A6C9		0.436226	0.446744	1.22499	0.366678	tr|E2A6C9|E2A6C9_CAMFO Protein G12 OS=Camponotus floridanus (Florida carpenter ant) OX=104421 GN=EAG_09904 PE=4 SV=1	-0.324606895446777	-4.27872085571289	-2.3056468963623	-2.2596263885498	1.85957717895508	-8.49543571472168	-7.17931842803955	-1.35899925231934	-10.3438339233398	-1.77375602722168	-4.04038619995117	1.52290725708008	-0.745990753173828	-2.44129371643066	-8.53903675079346	-7.49834537506104	-1.6175365447998	1.64010620117188	-1.7287654876709	-2.7773904800415	-0.614469528198242	-7.53106594085693	-7.69168138504028	0.884511947631836	2.43707466125488	-0.518125534057617	2.11700630187988	6.10186386108398	-0.438694953918457	-7.66071557998657	6.07327842712402	-2.44805526733398	-6.64079666137695	-2.30930233001709	-9.94372081756592	-2.57169342041016	5.78988075256348	-1.71293258666992	-3.39876842498779	-2.40750408172607	-6.52979516983032	1.90141296386719
303	XP_011252356.1;E2A6I4		1.38386	0.276293	1.55096	0.566821	tr|E2A6I4|E2A6I4_CAMFO Vacuolar ATP synthase catalytic subunit A OS=Camponotus floridanus (Florida carpenter ant) OX=104421 GN=EAG_16297 PE=3 SV=1	-0.0801630020141602	0.517389297485352	-1.11657524108887	1.17792320251465	-1.26312828063965	-2.70913124084473	-0.356594085693359	-3.42340850830078	-3.49826908111572	-9.38692092895508	-1.51252365112305	-3.66436767578125	-0.705535888671875	-5.87722635269165	-3.50407981872559	-0.81740665435791	-4.271240234375	-2.97365379333496	-8.26912403106689	-0.95967960357666	-0.268218994140625	0.801101684570313	1.15482330322266	-0.964305877685547	-4.49449443817139	-3.46558570861816	-4.68455123901367	0.347745895385742	-1.94111728668213	-4.44237899780273	-1.53945541381836	-0.962154388427734	-4.05411148071289	-2.59075260162354	-0.522158622741699	-4.04777336120605	-1.07673263549805	0.316673278808594	1.00334453582764	-3.34606456756592	-1.86784648895264	0.467575073242188
305	XP_011252428.1;E2A6N1;XP_025262425.1;XP_011252154.1;XP_011252142.1;E1ZVV0;E1ZVU9;XP_025262454.1;XP_025262453.1;XP_025262452.1;XP_025262451.1		1.38148	0.406927	0.963312	0.391937	tr|E2A6N1|E2A6N1_CAMFO Tropomyosin-1 OS=Camponotus floridanus (Florida carpenter ant) OX=104421 GN=EAG_00808 PE=3 SV=1	1.69161891937256	2.92299461364746	0.988075256347656	3.24811935424805	1.86246871948242	-0.382146835327148	2.08192253112793	-0.0357322692871094	-2.17979526519775	-1.13581275939941	0.0968894958496094	-2.14448356628418	2.81014060974121	0.918453216552734	-1.62749862670898	1.15098094940186	1.20893859863281	1.38603210449219	2.12635612487793	0.26648998260498	2.11778259277344	-0.371816635131836	0.728246688842773	2.61843872070313	1.51284027099609	-1.84138488769531	0.671680450439453	0.923397064208984	0.778458595275879	0.436519622802734	0.150222778320313	-1.4073371887207	2.73036003112793	-0.0491819381713867	1.46723651885986	0.389232635498047	1.72243118286133	3.15588760375977	-1.43630886077881	0.328938484191895	0.387314796447754	2.44595527648926
313	E2A6W8;XP_011252591.1		0.0116928	0.992262	-0.0325785	-0.0109604	tr|E2A6W8|E2A6W8_CAMFO Folate gamma-glutamyl hydrolase OS=Camponotus floridanus (Florida carpenter ant) OX=104421 GN=EAG_02507 PE=4 SV=1;|XP_011252591.1 chitobiosyldiphosphodolichol beta-mannosyltransferase [Camponotus floridanus]	-2.22463130950928	-7.53044939041138	-5.66557741165161	-2.12032318115234	-1.13885116577148	-3.01560020446777	-3.42819786071777	-7.43599653244019	-3.05902004241943	-10.0678777694702	-2.91409492492676	-2.75634002685547	-0.757863998413086	-7.99900388717651	-7.71201705932617	-4.02138805389404	-1.92515754699707	-0.54095458984375	-3.13676452636719	-3.01226902008057	-3.87993621826172	0.167446136474609	-3.58607482910156	-2.18908500671387	-8.6068000793457	0.0202922821044922	-9.07046127319336	-1.42244148254395	-3.82948207855225	-3.24691581726074	-2.19979286193848	-1.01724815368652	-2.55000686645508	0.16814136505127	-2.49928379058838	-0.505578994750977	-1.65554618835449	-0.548364639282227	1.385422706604	0.239556312561035	-9.14838027954102	-2.13637733459473
333	XP_011253127.1;XP_011253125.1;E2A7Y1;XP_025266675.1;XP_011253124.1		0.350247	0.577725	0.822006	0.267821	tr|E2A7Y1|E2A7Y1_CAMFO Alpha-galactosidase OS=Camponotus floridanus (Florida carpenter ant)	-0.0614614486694336	-0.659933090209961	-0.0512447357177734	-0.881830215454102	0.190839767456055	-1.94947624206543	-3.25165939331055	1.13554000854492	-4.45638370513916	-0.796867370605469	2.08046340942383	2.34030342102051	1.1077709197998	-1.00626754760742	0.111906051635742	-3.72677707672119	-5.91310596466064	1.05969619750977	-7.28361654281616	-0.408492088317871	0.444969177246094	-8.47830009460449	-1.57315254211426	-3.0462589263916	-0.816381454467773	-9.0510778427124	-1.03523826599121	2.18477821350098	-2.15509700775146	-6.66213178634644	1.87604713439941	-2.89655685424805	-1.88672256469727	-6.96683931350708	-3.48157596588135	-2.58506011962891	2.14435195922852	-5.33230352401733	-0.0875005722045898	-8.7553596496582	-1.04243183135986	1.96415710449219
342	XP_011253314.1;E2A8B3		0.513769	0.505261	0.972483	0.330905	tr|E2A8B3|E2A8B3_CAMFO Dolichyl-diphosphooligosaccharide--protein glycosyltransferase subunit 1 OS=Camponotus floridanus (Florida carpenter ant)	-0.564200401306152	-0.0391483306884766	-2.97282981872559	-0.903646469116211	-4.64041709899902	-5.34472274780273	-1.84642791748047	-8.9735107421875	-0.826279640197754	-10.9708528518677	-3.15200424194336	-4.33267593383789	-1.11815643310547	-7.90434265136719	-6.64975166320801	-5.41669750213623	-3.1734676361084	-0.81260871887207	-6.82311964035034	-0.291953086853027	0.0549564361572266	-5.15666389465332	-1.47859573364258	-1.99071884155273	-5.27763652801514	-9.13572597503662	-1.97315788269043	-1.31335830688477	-1.14050960540771	-9.69658660888672	-2.1356029510498	-4.69699668884277	-5.99956941604614	-4.77859401702881	-4.03438472747803	-2.79463768005371	-3.04793739318848	-4.06957626342773	-3.67755603790283	-8.40683364868164	-8.38832855224609	-0.90135383605957
354	XP_011253679.1;E2A8Y6		1.23755	0.143478	2.3679	0.736869	tr|E2A8Y6|E2A8Y6_CAMFO Superoxide dismutase [Cu-Zn] OS=Camponotus floridanus (Florida carpenter ant) OX=104421 GN=EAG_07480 PE=3 SV=1	1.64729404449463	2.55483245849609	0.911388397216797	-0.775123596191406	0.546205520629883	-8.29509925842285	0.424392700195313	-8.21666812896729	0.755379676818848	3.3751049041748	4.54213523864746	5.21881675720215	3.93435478210449	-6.83844804763794	3.3727970123291	-1.84298038482666	0.46623420715332	2.92485809326172	0.598798751831055	2.86505794525146	2.51273155212402	-3.4266300201416	1.94267654418945	1.94317817687988	-6.21367788314819	-0.795520782470703	-7.32580327987671	4.09926986694336	4.36784648895264	4.43288612365723	5.10495948791504	-0.543630599975586	-2.08285331726074	-2.23433780670166	1.10376453399658	-1.77868843078613	3.5427074432373	0.502344131469727	3.64699077606201	-0.175873756408691	-9.05716609954834	3.55554008483887
371	XP_011254034.1;E2A9P3		0.369188	0.616106	-0.708164	-0.245602	tr|E2A9P3|E2A9P3_CAMFO Vitellogenin domain-containing protein OS=Camponotus floridanus (Florida carpenter ant) OX=104421 GN=EAG_11463 PE=4 SV=1	-4.98098850250244	-4.25537300109863	-4.70841789245605	-6.77982521057129	-2.43821334838867	-7.03513669967651	-2.03351593017578	-3.98527145385742	-0.877131462097168	-4.6771068572998	-1.81221580505371	1.55866241455078	-4.77853202819824	-3.5656681060791	-0.563863754272461	-8.85360145568848	0.685096740722656	-2.09667015075684	-0.806331634521484	-5.19213199615479	-5.03140640258789	-3.2745418548584	-9.23923683166504	-7.36423635482788	-2.90863037109375	-5.94750595092773	0.825702667236328	-5.60000610351563	-2.16381931304932	-4.92593955993652	-1.20300102233887	-5.52078437805176	-6.78646802902222	-2.29841136932373	-4.69464588165283	-8.29758548736572	-5.96830940246582	-4.17788696289063	-4.16981220245361	1.19675731658936	-2.91283702850342	-5.86099433898926
409	XP_011254633.1;E2AAT2		0.859952	0.427176	1.14967	0.416539	tr|E2AAT2|E2AAT2_CAMFO Eukaryotic translation initiation factor 3 subunit B OS=Camponotus floridanus (Florida carpenter ant) OX=104421 GN=EAG_06656 PE=3 SV=1	-3.14775943756104	-0.289167404174805	-3.94363403320313	-3.25914001464844	-4.31899452209473	-7.66327285766602	-4.6479320526123	-7.78502988815308	-6.57161045074463	-3.16052055358887	-2.52055549621582	-2.13460350036621	-1.31388473510742	-3.78594207763672	-5.80625057220459	-2.92829036712646	-3.35812187194824	-1.27040863037109	-8.96468257904053	-2.13592433929443	-0.670707702636719	-3.18769836425781	-3.45216941833496	-2.89970588684082	-4.24125862121582	-4.25381851196289	-4.20872116088867	-1.83833694458008	-2.44656276702881	-3.03744506835938	-3.77251243591309	-9.35723304748535	-5.07842636108398	-9.07006931304932	-5.65459537506104	-3.70830726623535	-3.9435920715332	-8.45078754425049	-5.28381824493408	-8.25879192352295	-7.97190570831299	-1.52251434326172
412	XP_011254740.1;E2AB19		0.894764	0.414295	1.22885	0.440478	tr|E2AB19|E2AB19_CAMFO Ribos_L4_asso_C domain-containing protein OS=Camponotus floridanus (Florida carpenter ant) OX=104421 GN=EAG_01035 PE=4 SV=1	-2.07077693939209	-0.927648544311523	-3.16376304626465	-1.50308418273926	-3.7027645111084	-5.88326168060303	-3.02978706359863	-7.67284727096558	-6.54481363296509	-2.58665466308594	-4.58559799194336	-4.58827018737793	-1.28383636474609	-8.87644481658936	-4.39813232421875	-2.85232257843018	-2.96316719055176	-3.43939590454102	-7.21133375167847	-3.25916767120361	-1.43407440185547	-6.82837390899658	0.202123641967773	-1.65756797790527	-0.638116836547852	-2.54343223571777	-6.70585775375366	-1.17559814453125	-2.56141185760498	0.811586380004883	0.00131607055664063	-3.37596702575684	-0.451921463012695	-1.58628177642822	-3.7390775680542	-3.98019790649414	-0.792922973632813	1.22309303283691	-1.08925724029541	-7.19814443588257	-3.38616275787354	-0.600652694702148
413	XP_019882849.1;E2AB23		2.95626	0.104	3.51269	1.17052	tr|E2AB23|E2AB23_CAMFO Aldo_ket_red domain-containing protein OS=Camponotus floridanus (Florida carpenter ant) OX=104421 GN=EAG_01039 PE=4 SV=1	-0.947815895080566	-2.27151489257813	-2.68669700622559	-1.58813858032227	-1.98280143737793	-0.780553817749023	-2.30897331237793	-9.75739669799805	-5.3918628692627	-2.99807739257813	-0.310176849365234	2.26956558227539	-0.703447341918945	-9.75348854064941	0.585222244262695	-2.7251443862915	-3.74161720275879	-2.54606246948242	-4.70822143554688	-1.49179363250732	-0.789627075195313	-1.72556686401367	-1.53733825683594	-1.6004524230957	-7.71208333969116	-8.63594436645508	-8.59776210784912	1.73581695556641	-2.54993152618408	-6.00100660324097	0.39936637878418	-10.2243432998657	-8.0010404586792	-9.83249473571777	-3.0437650680542	-6.19458627700806	-2.39817428588867	-1.9430103302002	1.88016605377197	-8.30572605133057	-8.87717151641846	-1.0977897644043
428	E2ABN0;XP_011255042.2;XP_011255044.1;XP_011255043.1		0.399007	0.582297	0.84341	0.282114	tr|E2ABN0|E2ABN0_CAMFO Apolipoprotein D OS=Camponotus floridanus (Florida carpenter ant) OX=104421 GN=EAG_14390 PE=3 SV=1;|XP_011255042.2 apolipoprotein D-like [Camponotus floridanus]	-7.62526655197144	-3.07906913757324	2.73658180236816	-5.24139022827148	-5.5894775390625	-3.41211318969727	-2.02572250366211	-2.78861808776855	-4.89174747467041	-1.78564643859863	-2.12025260925293	2.21463012695313	-5.46242332458496	-2.3208179473877	0.222499847412109	-9.87582778930664	-1.60613822937012	-1.14542579650879	-4.14005851745605	-3.679123878479	-5.82717895507813	-5.05837821960449	0.974822998046875	-3.38663101196289	-3.04129981994629	-0.905767440795898	-0.768896102905273	-3.47232627868652	-3.38926100730896	-2.65765571594238	-3.45162391662598	-10.2495002746582	-3.96927642822266	-10.84326171875	-6.90679836273193	-3.1495361328125	-4.96451568603516	-5.24614334106445	-3.77710437774658	-0.701849937438965	-9.49197006225586	-4.97521638870239
432	XP_011255085.1;E2ABQ6		2.97633	0.142	2.46289	0.912646	tr|E2ABQ6|E2ABQ6_CAMFO Glyceraldehyde-3-phosphate dehydrogenase OS=Camponotus floridanus (Florida carpenter ant) OX=104421 GN=EAG_14416 PE=3 SV=1	0.0980138778686523	-0.795768737792969	-2.0941104888916	-0.542400360107422	0.0281047821044922	-4.55443048477173	-0.763326644897461	-3.53108787536621	-2.69941806793213	0.0731010437011719	-0.655794143676758	2.31164932250977	-0.116765975952148	-8.39212894439697	0.0279865264892578	-3.03567790985107	-4.91979694366455	-1.14587783813477	-2.69450569152832	-2.81704044342041	-0.577531814575195	0.175832748413086	-0.809383392333984	-0.385101318359375	-0.166568756103516	-1.92101860046387	-1.73386383056641	2.85892677307129	-0.835709571838379	0	0.219070434570313	-9.03804206848145	-2.39797401428223	-1.48671817779541	-2.85092258453369	-5.35732078552246	-0.425498962402344	-0.782470703125	1.95473194122314	-2.39790821075439	-6.32180023193359	-0.689399719238281
436	E2ABW9;XP_011255166.1		0.770302	0.39485	1.12651	0.401473	tr|E2ABW9|E2ABW9_CAMFO ATP synthase subunit beta OS=Camponotus floridanus (Florida carpenter ant) OX=104421 GN=EAG_02827 PE=3 SV=1;|XP_011255166.1 ATP synthase subunit beta, mitochondrial [Camponotus floridanus]	-0.345065116882324	-2.76418113708496	-1.03509140014648	0.200166702270508	-2.76555633544922	0.569204330444336	0.395946502685547	0.210172653198242	-3.43093204498291	-4.51711463928223	-1.48648071289063	-5.2429313659668	-2.51919937133789	-8.26723957061768	-4.65064430236816	-0.0672540664672852	-2.96296501159668	-3.37286567687988	-2.78485488891602	-0.22481632232666	-1.14682197570801	-3.95852470397949	-1.07266616821289	0.562149047851563	0.127777099609375	-0.939144134521484	-1.28013610839844	-0.958225250244141	-0.366366386413574	-8.9222469329834	-1.40496444702148	-2.45227432250977	-7.48671340942383	-3.73862171173096	0.458508491516113	-3.5030517578125	-1.40814018249512	0.235734939575195	-0.779204368591309	-8.28495216369629	0.219599723815918	0.0987701416015625
443	XP_011255282.1;E2AC27		0.689404	0.577388	-0.750682	-0.290719	tr|E2AC27|E2AC27_CAMFO GMC_OxRdtase_N domain-containing protein OS=Camponotus floridanus (Florida carpenter ant) OX=104421 GN=EAG_13495 PE=4 SV=1	7.58146572113037	8.70147895812988	7.60084915161133	5.79289817810059	8.83517265319824	7.25699234008789	9.70583152770996	5.30835914611816	10.1393251419067	10.2435836791992	8.36823463439941	5.70298385620117	7.81447601318359	10.0646553039551	4.57861137390137	10.2534704208374	10.9591960906982	9.65738105773926	7.23848724365234	8.99906063079834	8.52072906494141	10.1829566955566	9.76215553283691	9.41450119018555	11.5213680267334	10.6777420043945	11.0054893493652	6.489501953125	9.58058643341064	11.2656688690186	7.53761863708496	11.0461235046387	10.7086906433105	11.0727586746216	9.05984401702881	10.6538066864014	8.33929252624512	10.0870056152344	6.14485454559326	11.0535154342651	10.4375486373901	7.86119079589844
444	XP_011255300.1;E2AC60		0.405107	0.686475	0.564015	0.212518	tr|E2AC60|E2AC60_CAMFO Beta-hexosaminidase OS=Camponotus floridanus (Florida carpenter ant) OX=104421 GN=EAG_07587 PE=3 SV=1	0.174551963806152	2.014892578125	3.88611602783203	1.34706878662109	1.61483192443848	-0.816642761230469	3.42718887329102	-9.11102390289307	3.18612957000732	3.52849960327148	3.96839904785156	3.08779907226563	2.73147201538086	2.19239234924316	3.4662971496582	3.20204448699951	1.20964050292969	2.94941902160645	0.388402938842773	3.29982089996338	2.39749908447266	1.91085052490234	2.2293586730957	2.20713806152344	1.88982009887695	1.81071281433105	2.47897148132324	1.12389755249023	2.99483013153076	1.83878135681152	0.228408813476563	0.781869888305664	3.32215118408203	1.50210285186768	2.43083477020264	3.82064628601074	1.80815315246582	3.08236885070801	2.24215602874756	2.51954746246338	2.05379581451416	1.24069023132324
447	E2AC94		0.565677	0.426761	1.29127	0.408718	tr|E2AC94|E2AC94_CAMFO Hexamerin OS=Camponotus floridanus (Florida carpenter ant) OX=104421 GN=EAG_02268 PE=4 SV=1	2.51410388946533	-0.394281387329102	2.0573558807373	-0.741737365722656	2.69031715393066	0.447597503662109	3.20047187805176	0	0.538878440856934	3.06767272949219	1.21824264526367	5.15465354919434	-0.832561492919922	-0.465511322021484	5.75334548950195	-1.28743267059326	0.630800247192383	-1.26624298095703	0.00718879699707031	1.30360126495361	3.24655723571777	-1.94946479797363	-0.731067657470703	-0.472959518432617	-2.1312198638916	-2.62679672241211	-8.08913803100586	-0.277616500854492	-6.28197765350342	-7.06017446517944	1.80016899108887	-5.22512626647949	-2.97376823425293	-6.91068267822266	-3.58689022064209	-7.82658672332764	-1.74092292785645	-4.39850425720215	-0.620230674743652	-3.56956005096436	-11.1679096221924	-2.25525093078613
449	XP_011255385.1;E2ACC1		1.80836	0.115667	2.54412	0.845865	tr|E2ACC1|E2ACC1_CAMFO Uricase OS=Camponotus floridanus (Florida carpenter ant) OX=104421 GN=EAG_03488 PE=3 SV=1	2.56494998931885	2.82762336730957	-0.992622375488281	1.0219669342041	0.0315227508544922	-3.36091804504395	0.971744537353516	-7.80772972106934	-0.327557563781738	-3.46049880981445	-1.73547744750977	2.00692558288574	3.52237319946289	-7.55913591384888	0.578350067138672	-0.578890800476074	-2.68063163757324	1.42485618591309	-0.250698089599609	2.20167255401611	1.09875679016113	-7.54339456558228	1.15211486816406	1.46188545227051	-2.19429588317871	-6.39216041564941	-2.9392261505127	2.25333213806152	-2.40469455718994	-2.16861724853516	1.55934143066406	-10.0523366928101	-5.62576150894165	-6.83634328842163	0.890490531921387	1.66833877563477	0.213769912719727	-1.12881278991699	-2.37049198150635	-2.49305820465088	-2.89088726043701	2.32311820983887
456	XP_011255648.1;E2ACR5		1.21034	0.261846	1.67036	0.582167	tr|E2ACR5|E2ACR5_CAMFO Annexin OS=Camponotus floridanus (Florida carpenter ant) OX=104421 GN=EAG_15889 PE=3 SV=1	-1.73262500762939	-2.01508140563965	-2.3669490814209	-2.21402931213379	-1.58837127685547	-2.69363021850586	-3.46942329406738	-1.49318313598633	-9.64783573150635	-1.52864265441895	-3.4698543548584	-1.60462951660156	-0.527202606201172	-9.77681827545166	-2.90411567687988	-2.97938823699951	-1.3892993927002	-3.90466499328613	-6.25027656555176	-1.91833972930908	-1.26883888244629	-2.65709686279297	-3.5531120300293	2.98370552062988	0.211605072021484	1.03279304504395	-5.34683322906494	-0.316341400146484	-1.22462749481201	-9.60286235809326	-0.325189590454102	-9.57656002044678	-6.30418014526367	-2.70653247833252	-4.37421321868896	-0.386165618896484	-2.23809814453125	-2.80763626098633	-2.85764217376709	-3.95919895172119	-3.58682346343994	-0.016998291015625
457	XP_011255653.1;E2ACR9		0.906386	0.259412	-1.95963	-0.603332	tr|E2ACR9|E2ACR9_CAMFO Calmodulin OS=Camponotus floridanus (Florida carpenter ant) OX=104421 GN=EAG_15893 PE=3 SV=1	-3.17758464813232	-0.329755783081055	-1.35656356811523	-7.98605060577393	-7.57307195663452	-0.23176383972168	-5.24810791015625	-1.32575225830078	-8.48631477355957	2.12780952453613	1.73725509643555	-2.82789421081543	-4.94869089126587	2.21137809753418	-2.44911575317383	1.74966907501221	1.6980094909668	3.02997779846191	-8.24586391448975	1.57095623016357	-0.263635635375977	-6.47190475463867	3.03458786010742	-7.78952789306641	3.49330520629883	4.4682502746582	1.53883743286133	0.34184455871582	2.28790378570557	4.39228057861328	-1.83477020263672	3.97501564025879	3.89943313598633	3.90135860443115	2.60896587371826	3.63561248779297	1.48945617675781	3.63335609436035	2.31668186187744	2.60692691802979	2.440749168396	0.979297637939453
481	XP_011256104.1;E2ADN0		1.82507	0.122182	2.55432	0.849874	tr|E2ADN0|E2ADN0_CAMFO Malate dehydrogenase OS=Camponotus floridanus (Florida carpenter ant) OX=104421 GN=EAG_10365 PE=3 SV=1	0.127572059631348	-1.47916984558105	-1.9406566619873	-1.61384773254395	-4.66552925109863	-1.01809120178223	-6.49423837661743	-8.30794143676758	-8.85372352600098	-2.340087890625	-0.165454864501953	3.09297943115234	1.17445945739746	-8.45905303955078	-3.43978500366211	-3.71421146392822	-3.08278179168701	-2.73562812805176	-6.73621082305908	-0.790287971496582	-2.36834526062012	-7.43768358230591	-4.65461158752441	0.52348518371582	-0.668861389160156	-2.93264389038086	-3.15472984313965	2.91066741943359	1.58530902862549	-1.42408752441406	1.5609188079834	-2.35998916625977	-5.33307218551636	-7.77527141571045	-1.43457126617432	-5.17764091491699	1.64105224609375	-2.2762279510498	0.854996681213379	-1.61468982696533	-8.55444812774658	1.46043014526367
487	XP_011256209.1;E2ADT4		0.566097	0.576706	0.75518	0.282032	tr|E2ADT4|E2ADT4_CAMFO Aamy domain-containing protein OS=Camponotus floridanus (Florida carpenter ant) OX=104421 GN=EAG_10419 PE=4 SV=1	-2.74911594390869	-3.27708053588867	-3.30052185058594	-3.36323356628418	-3.38802719116211	-3.82212257385254	-3.53533744812012	-6.41274452209473	-8.46347332000732	-1.11735343933105	-1.39425849914551	-2.43946266174316	-2.93165397644043	-6.8609471321106	-0.169816970825195	-3.36182689666748	-2.80318737030029	-4.45566749572754	-5.92965221405029	-3.81814098358154	-1.39896965026855	-1.9326171875	-5.56587600708008	-1.79103660583496	-1.46175384521484	-1.36408424377441	-2.65773773193359	-3.98308372497559	-4.25860691070557	-2.81391906738281	-4.88142585754395	-9.26542472839355	-2.27938842773438	-2.24595737457275	-5.03201389312744	-1.87782669067383	-5.16058731079102	-4.19598960876465	0.143635749816895	-3.61706638336182	-3.66088962554932	-5.35592842102051
499	XP_011256478.1;E2AE51		0.382621	0.8598	0.261394	0.112816	tr|E2AE51|E2AE51_CAMFO Cathepsin L OS=Camponotus floridanus (Florida carpenter ant) OX=104421 GN=EAG_13195 PE=3 SV=1	0.239489555358887	1.0367431640625	0.812383651733398	-0.667030334472656	0.108514785766602	-0.482534408569336	-0.291357040405273	-2.30030250549316	-0.316628456115723	1.07135391235352	1.37105178833008	0.935665130615234	2.20098686218262	-1.64855766296387	0.0646896362304688	-0.0541677474975586	0.812541961669922	0.416757583618164	-0.238796234130859	1.53203296661377	-0.151262283325195	1.80799674987793	-0.44828987121582	0.844392776489258	1.89166641235352	0.435319900512695	2.10971069335938	-1.28356552124023	1.2385950088501	1.30075454711914	-0.318115234375	-0.0701637268066406	1.16229820251465	0.143786430358887	0.815583229064941	2.13826560974121	-0.143087387084961	0.479707717895508	-0.560311317443848	0.0455026626586914	0.17002010345459	0.553848266601563
521	XP_019883183.1;E2AEN9;XP_011256790.1		0.603853	0.482091	-0.992272	-0.348351	tr|E2AEN9|E2AEN9_CAMFO Cuticlin-1 OS=Camponotus floridanus (Florida carpenter ant) OX=104421 GN=EAG_10698 PE=4 SV=1;|XP_011256790.1 uncharacterized protein LOC105251573 i	-4.87376308441162	-2.70335388183594	-2.00260543823242	-6.12473154067993	0.0429325103759766	-0.932296752929688	1.43645477294922	-8.80718040466309	0.935208320617676	1.05777740478516	-1.00198364257813	-1.56874847412109	-3.91173410415649	0	-3.22301292419434	0.0541677474975586	-1.12220764160156	0.305074691772461	-0.528812408447266	-0.774882316589355	-0.639408111572266	1.9508228302002	0	-6.31002950668335	2.35055541992188	1.84677505493164	1.51549911499023	-3.43988418579102	-1.11098384857178	2.74091911315918	-2.83585739135742	1.96457290649414	3.90184783935547	2.15237522125244	-0.207528114318848	1.38598251342773	-2.11397552490234	-0.772781372070313	-4.30849742889404	1.475998878479	1.0422830581665	-1.22264671325684
532	E2AFL0;XP_011257234.1;XP_011257235.1		1.7793	0.1344	2.58039	0.850694	tr|E2AFL0|E2AFL0_CAMFO Transaldolase OS=Camponotus floridanus (Florida carpenter ant) OX=104421 GN=EAG_02708 PE=3 SV=1;|XP_011257235.1 transaldolase isoform X2 [Camponotus floridanus]	0.383671760559082	0.247613906860352	-3.65430450439453	-0.0764045715332031	-0.902561187744141	-0.961483001708984	4.10093879699707	-8.0131893157959	-8.24114227294922	1.34443473815918	1.67909622192383	3.69334602355957	1.37355041503906	-7.53441476821899	1.16562271118164	-1.92936229705811	-7.4353175163269	-2.7750186920166	-0.286836624145508	-0.552660942077637	0.0220069885253906	-3.17721939086914	-2.32356452941895	2.08189964294434	-7.82032299041748	-1.1466121673584	-8.9249849319458	1.52897262573242	-0.518651008605957	-3.79280853271484	0.577455520629883	-1.94391059875488	-0.942415237426758	-1.94650554656982	-1.50359439849854	2.32233428955078	0.115301132202148	-2.55740928649902	1.67855930328369	-8.83922481536865	-1.17100811004639	0.623332977294922
536	XP_011257276.1;E2AFM8		1.83851	0.14375	2.27278	0.786349	tr|E2AFM8|E2AFM8_CAMFO 40S ribosomal protein SA OS=Camponotus floridanus (Florida carpenter ant) OX=104421 GN=EAG_02726 PE=3 SV=1	-0.417315483093262	0	-1.68131637573242	0.521329879760742	0.851551055908203	-5.80194568634033	-0.872854232788086	0.536100387573242	-9.1627779006958	-0.112680435180664	-3.57255744934082	-2.46112823486328	-0.371545791625977	-3.38154792785645	-1.44830131530762	0.0623579025268555	-7.84826040267944	-0.90412712097168	-8.92582035064697	-2.60598850250244	0.189151763916016	-4.74256229400635	-2.24476432800293	-0.758190155029297	-2.14224815368652	-8.06287574768066	-9.6922779083252	-0.714799880981445	-1.55205821990967	1.09005355834961	-0.762340545654297	-0.798873901367188	-0.791746139526367	-7.29394149780273	-4.57565021514893	-2.88553428649902	-0.0735683441162109	0.534486770629883	-1.77719783782959	0.115921974182129	-3.06250476837158	-1.27754402160645
537	XP_011257343.1;XP_011257342.1;E2AFQ5		1.85051	0.28093	1.42489	0.55753	tr|E2AFQ5|E2AFQ5_CAMFO Actin-5C OS=Camponotus floridanus (Florida carpenter ant) OX=104421 GN=EAG_04690 PE=3 SV=1	0.159548759460449	0.618345260620117	-0.199438095092773	0.577280044555664	-0.550945281982422	1.83809089660645	0.196414947509766	0.380012512207031	-1.03878879547119	-0.692733764648438	-1.12272262573242	-1.30867958068848	-0.554712295532227	-1.03436279296875	-0.0279865264892578	-0.917925834655762	-0.668014526367188	-1.08189582824707	-0.00214767456054688	-0.448672294616699	-0.488237380981445	-3.03408050537109	-0.131824493408203	-0.812219619750977	0.363882064819336	-0.911144256591797	0.0221824645996094	-0.657241821289063	0.102009773254395	-0.138805389404297	-0.708993911743164	-7.83531856536865	-2.40567016601563	-8.20567035675049	-0.683012962341309	0.0419082641601563	-1.22204780578613	-1.17875480651855	1.55947017669678	-0.652714729309082	0.431347846984863	-0.496393203735352
549	E2AGG0;XP_011257663.3		0.352562	0.681778	0.599675	0.216025	tr|E2AGG0|E2AGG0_CAMFO Phospholipase B1, membrane-associated OS=Camponotus floridanus (Florida carpenter ant) OX=104421 GN=EAG_02880 PE=4 SV=1;|XP_011257663.3 phospholipase B1, membrane-associated [Camponotus floridanus]	-0.83419132232666	-0.0715980529785156	2.79562759399414	4.67350196838379	2.38313865661621	5.57553672790527	1.66030883789063	4.16585540771484	2.24008464813232	0.705013275146484	-0.0968894958496094	-2.61140823364258	-1.26677131652832	1.40348434448242	2.97346687316895	1.80724811553955	2.75547027587891	-1.7984733581543	2.92319488525391	-1.02919101715088	1.40026092529297	4.55615043640137	2.47281837463379	0.686742782592773	3.56681442260742	-7.94534778594971	1.54282188415527	-1.32673263549805	-0.477025032043457	0.940261840820313	-0.189315795898438	0.171625137329102	0.971935272216797	-0.878342628479004	0.000266075134277344	-0.580635070800781	1.11823272705078	1.32362174987793	-2.36561107635498	-1.24044132232666	1.51944637298584	-1.2830753326416
555	XP_011257750.1;E2AGM0;E2A8L3;XP_011253498.1		2.8548	0.08	3.12307	1.07283	tr|E2AGM0|E2AGM0_CAMFO Tubulin alpha chain OS=Camponotus floridanus (Florida carpenter ant) OX=104421 GN=EAG_05971 PE=3 SV=1	-0.136763572692871	1.01611137390137	0.182868957519531	0.909265518188477	-0.594646453857422	-8.16144371032715	1.05292701721191	-6.6641149520874	-1.28635883331299	-2.54321670532227	-4.38946533203125	-0.904020309448242	-0.211177825927734	-9.06197452545166	1.01878356933594	0.0856504440307617	-10.2469654083252	-1.18085861206055	-1.84363746643066	-0.888638496398926	0.737316131591797	-3.18619728088379	-1.72698783874512	0	-0.570463180541992	-7.86994886398315	-0.352890014648438	-0.885856628417969	-0.37366771697998	-1.74711227416992	-1.88535499572754	-8.89793109893799	-3.65506172180176	-8.09770011901855	-7.78709411621094	-1.96663093566895	-1.71522903442383	-1.87084197998047	-1.78085422515869	-5.84085988998413	-2.69914722442627	-0.380853652954102
559	XP_011257803.1;E2AGQ1		0.144117	0.855746	-0.315557	-0.110084	tr|E2AGQ1|E2AGQ1_CAMFO Plug_translocon domain-containing protein OS=Camponotus floridanus (Florida carpenter ant) OX=104421 GN=EAG_00891 PE=3 SV=1	0.0802831649780273	1.35293769836426	0.138385772705078	0.125602722167969	-1.5276050567627	-7.12312316894531	-2.1765308380127	-0.739053726196289	-2.31579113006592	-0.226430892944336	-1.52544975280762	-5.09723854064941	-0.731668472290039	-0.287038803100586	-1.7393913269043	0.168536186218262	-0.941444396972656	1.14286041259766	-2.42924690246582	0.252608299255371	1.47551345825195	-7.75279474258423	-0.0204563140869141	-0.263116836547852	-7.18175840377808	-2.55362319946289	0	-0.360645294189453	-1.23809719085693	-9.71327209472656	0.110031127929688	-1.55344009399414	-1.7040843963623	-1.44500064849854	-8.65388774871826	-2.1523380279541	-2.04800987243652	-0.0209846496582031	-3.68753910064697	-1.14555072784424	0.00707721710205078	-0.129682540893555
597	E2AIX5;XP_025263124.1		0.0269828	0.981236	-0.0577384	-0.0209246	tr|E2AIX5|E2AIX5_CAMFO Maltase 1 OS=Camponotus floridanus (Florida carpenter ant) OX=104421 GN=EAG_01963 PE=4 SV=1	5.60401630401611	4.74387550354004	4.5322093963623	-0.812498092651367	6.19103813171387	3.36944580078125	7.4119758605957	0.565242767333984	7.31899547576904	7.41366958618164	5.99735069274902	2.18960571289063	4.16366386413574	7.28622055053711	0.136049270629883	6.39777088165283	6.00779151916504	6.41953277587891	6.05410766601563	6.70258808135986	4.80451011657715	5.55470657348633	5.88567733764648	5.17908477783203	8.12654876708984	8.08303642272949	3.8461971282959	1.47462844848633	7.02890682220459	7.04208564758301	0.0992183685302734	8.09609413146973	5.85514068603516	7.86612224578857	5.13654232025146	5.7544994354248	5.62635231018066	6.16645240783691	2.39669513702393	4.26999950408936	7.48673534393311	3.38000679016113
598	E2AIZ4;XP_025262148.1;XP_025262147.1;XP_025262146.1;XP_025262145.1;XP_025262144.1;XP_011258911.1;XP_011258910.1		1.19775	0.33104	1.38529	0.508164	tr|E2AIZ4|E2AIZ4_CAMFO Sodium/potassium-transporting ATPase subunit alpha OS=Camponotus floridanus (Florida carpenter ant) OX=104421 GN=EAG_15581 PE=3 SV=1;|XP_025262148.1 sodium/potassium-transporting ATPase subunit alpha isoform X7 [Camponotus floridanus]	-2.7266092300415	-0.940410614013672	-0.937763214111328	-2.14520072937012	-6.71188259124756	-7.18323564529419	-2.94441413879395	-6.85595941543579	-5.7105827331543	-8.29085159301758	-4.54361534118652	-5.81571960449219	-2.55765342712402	-3.3641471862793	-5.6379508972168	-2.22348117828369	-1.61375999450684	-3.09096717834473	-3.49755096435547	-3.62765979766846	-2.21718215942383	-4.55038070678711	-1.96831703186035	-2.09602928161621	-3.65729904174805	-5.68245840072632	-2.56406402587891	-4.12175750732422	-3.57438373565674	-3.33342742919922	-4.54867744445801	-9.9373025894165	-4.8658618927002	-9.74249076843262	-7.01414966583252	-1.7248363494873	-3.58022117614746	-2.08200454711914	-8.1449613571167	-4.22839069366455	-1.52214527130127	-2.49307250976563
599	XP_011258918.1;E2AIZ6		1.64996	0.126571	2.49169	0.817	tr|E2AIZ6|E2AIZ6_CAMFO ML domain-containing protein OS=Camponotus floridanus (Florida carpenter ant) OX=104421 GN=EAG_15583 PE=4 SV=1	4.24650096893311	3.68840789794922	5.06134796142578	4.11596298217773	5.2424488067627	3.15742301940918	4.08993721008301	-7.12159109115601	3.51454448699951	2.52971267700195	1.88607597351074	1.33888626098633	5.14168357849121	-4.08547973632813	0.249523162841797	3.83354663848877	-7.90808296203613	5.32214736938477	1.93077278137207	3.92046070098877	5.67198753356934	-0.595544815063477	4.02713203430176	4.24242210388184	2.29665184020996	3.30765533447266	5.52994728088379	3.49276542663574	0.97911548614502	-0.166505813598633	4.42171669006348	3.47716331481934	2.92824172973633	-8.90628719329834	3.91314220428467	4.59546089172363	4.66025543212891	2.99169731140137	3.03048801422119	3.72604846954346	3.86310863494873	5.49900054931641
608	E2AJ75;XP_011259035.1;XP_011259034.1;XP_011259042.1		0.0942034	0.945497	0.140031	0.0546241	tr|E2AJ75|E2AJ75_CAMFO Pyruvate kinase OS=Camponotus floridanus (Florida carpenter ant) OX=104421 GN=EAG_11009 PE=3 SV=1;|XP_011259034.1 pyruvate kinase-like isoform X1 [Camponotus flori	-3.81429004669189	-2.34369087219238	-2.06696128845215	-2.32537460327148	-3.11575126647949	-2.41073608398438	-3.69660377502441	-1.75076675415039	-7.16425037384033	-3.05155563354492	-3.62673759460449	-4.22336769104004	-3.81249809265137	-2.31924247741699	-1.17607688903809	-3.85776615142822	-2.92060661315918	-2.44834136962891	-5.72137355804443	-3.48429393768311	-1.25701713562012	-5.43955612182617	-3.15462112426758	-4.03158950805664	-0.826044082641602	-2.05475997924805	-0.269069671630859	-0.76116943359375	-3.43500423431396	-1.35185241699219	-2.58270263671875	-1.41682815551758	-6.29727554321289	-7.34273052215576	-4.74260807037354	-1.78092384338379	-4.33312797546387	-3.04330635070801	-2.88642978668213	-0.222659111022949	-1.25343608856201	-4.30697631835938
615	E2AJL8		1.38925	0.270595	-1.61761	-0.584852	tr|E2AJL8|E2AJL8_CAMFO Carboxylic ester hydrolase OS=Camponotus floridanus (Florida carpenter ant) OX=104421 GN=EAG_07771 PE=3 SV=1	0.728987693786621	2.62777900695801	3.81027221679688	-7.34207534790039	2.01972579956055	3.41581344604492	3.57372283935547	4.7763500213623	3.57296085357666	3.83232688903809	1.40717887878418	-2.56100082397461	-0.655656814575195	3.59767150878906	2.91176223754883	2.01246166229248	3.74450302124023	4.04393768310547	2.91843795776367	2.35338306427002	2.83992767333984	4.3137092590332	4.87729835510254	-0.216958999633789	5.14169311523438	3.77117729187012	5.48001861572266	1.04714393615723	4.48127460479736	6.71030616760254	1.46775054931641	5.45074272155762	5.38345718383789	4.07349491119385	3.12517833709717	4.11132621765137	-0.647775650024414	2.28582763671875	1.21072864532471	4.19552707672119	4.90105152130127	0.435159683227539
628	XP_011259459.2;E2AJX6		1.68061	0.263	1.57282	0.592514	tr|E2AJX6|E2AJX6_CAMFO Catalase OS=Camponotus floridanus (Florida carpenter ant) OX=104421 GN=EAG_13772 PE=3 SV=1	-0.238516807556152	-1.29074478149414	-1.84839820861816	-1.61224555969238	-0.0979557037353516	-1.03129196166992	-2.8226146697998	-5.43227434158325	-3.05806827545166	-3.01475715637207	-4.04134750366211	-3.98801422119141	-3.43768882751465	-8.91956329345703	-0.354118347167969	-1.21312618255615	-7.46560049057007	-1.03514862060547	-4.29720115661621	-5.71095323562622	-1.47886276245117	-5.20293664932251	0.757966995239258	-1.69830513000488	-1.79001426696777	-3.16647148132324	-3.63467407226563	0.130979537963867	-2.9115629196167	-1.41201400756836	-1.8051586151123	-2.5207576751709	-4.46920394897461	-1.93942546844482	-3.4751672744751	-3.11235809326172	-2.2491283416748	-2.95379447937012	2.74686717987061	-0.367291450500488	-0.717267036437988	-1.42733001708984
632	E2AK03;XP_025267872.1		1.70769	0.136667	2.28862	0.777876	tr|E2AK03|E2AK03_CAMFO Protein CREG1 OS=Camponotus floridanus (Florida carpenter ant) OX=104421 GN=EAG_05018 PE=4 SV=1;|XP_025267872.1 protein CREG1 [Camponotus floridanus]	3.0847692489624	-0.715620040893555	1.94168853759766	-0.978481292724609	3.15950012207031	-0.100702285766602	-1.8699836730957	-6.81857490539551	-0.361804008483887	3.84045028686523	2.53115272521973	1.90049743652344	1.93793678283691	1.81229972839355	-3.70365142822266	0.523371696472168	-3.04286670684814	2.82414817810059	3.4012451171875	1.19176006317139	2.20398139953613	2.91304016113281	2.43263626098633	1.58693313598633	-4.55374240875244	4.30266189575195	-7.36989784240723	-1.23302841186523	2.3591833114624	1.1180248260498	-8.26403903961182	1.5101318359375	-1.24645233154297	-0.199687004089355	-0.76616382598877	-0.576078414916992	-0.164756774902344	-5.62170219421387	-0.985527992248535	-0.612896919250488	2.69146633148193	-1.39898681640625
633	E2AK04;XP_011259541.1		0.457284	0.791761	-0.345642	-0.146163	tr|E2AK04|E2AK04_CAMFO Protein CREG1 OS=Camponotus floridanus (Florida carpenter ant) OX=104421 GN=EAG_05019 PE=4 SV=1;|XP_011259541.1 protein CREG1-like [Camponotus floridanus]	1.36780261993408	-0.129110336303711	1.42962074279785	-0.732816696166992	1.70034027099609	-1.07406234741211	-2.11675643920898	-0.973855972290039	0.0801820755004883	-1.09575843811035	0.649791717529297	-0.570852279663086	1.37080001831055	0.202669143676758	0.214427947998047	-0.120602607727051	0.334095001220703	0.572198867797852	-0.948688507080078	0.80809497833252	1.36518859863281	-2.68680953979492	0.70994758605957	-0.55780029296875	-0.908945083618164	-2.06958198547363	1.96329116821289	0.229808807373047	0.154215812683105	-0.103000640869141	0.94355583190918	1.97043037414551	-0.422510147094727	1.58101749420166	1.83948993682861	0.814186096191406	0.871105194091797	0.771711349487305	1.31616878509521	-0.993645668029785	0.883730888366699	0.273580551147461
641	XP_011259751.1;E2AKD6		1.14033	0.16768	2.30176	0.708646	tr|E2AKD6|E2AKD6_CAMFO V-type proton ATPase proteolipid subunit OS=Camponotus floridanus (Florida carpenter ant) OX=104421 GN=EAG_15368 PE=3 SV=1	3.13212299346924	4.37647247314453	2.55436134338379	2.92222023010254	2.28075408935547	0.395181655883789	2.48539161682129	-8.40181922912598	0.00931453704833984	2.25503921508789	3.38178825378418	2.23397636413574	2.0399112701416	-8.22855949401855	-0.483247756958008	3.28146839141846	-7.66128826141357	3.80404472351074	-6.64306211471558	2.33691692352295	2.96679306030273	1.05901718139648	6.50021553039551	3.43528747558594	-0.204797744750977	1.02162742614746	-7.89576435089111	2.00364303588867	-9.36296272277832	2.60280799865723	2.99599456787109	3.79444694519043	2.73177337646484	5.5176477432251	2.86997127532959	1.99218559265137	1.99057579040527	3.68059921264648	4.69430828094482	1.86502933502197	2.62741184234619	4.58176612854004
642	XP_025266940.1;XP_019883729.1;E2AKF6		1.06651	0.284	1.61021	0.552446	tr|E2AKF6|E2AKF6_CAMFO DOMON domain-containing protein CG14681 OS=Camponotus floridanus (Flori	-1.95135593414307	-3.18783187866211	0.627670288085938	-0.821033477783203	-7.31155300140381	-3.71162223815918	-4.42947006225586	-11.5673723220825	-3.129075050354	-3.69205474853516	-0.409406661987305	0.493524551391602	-1.64131164550781	-8.34462451934814	0.0692787170410156	-5.96658420562744	-1.56238174438477	-2.092041015625	-4.43854331970215	-1.99911975860596	-1.3555736541748	0.938255310058594	-5.16016387939453	-0.622674942016602	-3.98909950256348	-2.45895385742188	-7.85827302932739	-3.83382606506348	-6.80531597137451	-4.78779411315918	-4.29348945617676	-9.99663543701172	-4.00445938110352	-6.61077928543091	-3.16591548919678	-0.368984222412109	-3.72478675842285	-5.72044897079468	-6.76697254180908	-2.91493511199951	0.361645698547363	-4.25211715698242
648	XP_011259986.1;E2AKV6		2.08138	0.173778	1.83913	0.690647	tr|E2AKV6|E2AKV6_CAMFO Heat shock 70 kDa protein cognate 4 OS=Camponotus floridanus (Florida carpenter ant) OX=104421 GN=EAG_08137 PE=3 SV=1	0.711276054382324	0.0906581878662109	-1.42029190063477	0.407693862915039	0.840423583984375	-5.67725944519043	-0.212203979492188	-3.84452247619629	-2.66663646697998	-3.29243659973145	-1.13507080078125	-0.795373916625977	-0.714330673217773	-1.63634300231934	-0.338813781738281	-1.16649341583252	-1.26570892333984	-1.85226440429688	-1.5262565612793	-0.735312461853027	0.598514556884766	-1.76410484313965	0.626556396484375	-0.665746688842773	-7.06727075576782	-4.2066764831543	-1.07733154296875	0.895839691162109	-0.533230781555176	0.304655075073242	-1.14770126342773	-7.73779058456421	-7.57761287689209	-1.20647525787354	-3.26703548431396	-1.9577522277832	-1.27855110168457	-0.639003753662109	1.79099178314209	1.19295406341553	-3.08261966705322	-0.530336380004883
650	XP_011260079.2;E2AL14		0.767216	0.376429	1.41739	0.469801	tr|E2AL14|E2AL14_CAMFO Plasminogen activator inhibitor 1 OS=Camponotus floridanus (Florida carpenter ant) OX=104421 GN=EAG_06984 PE=3 SV=1	-3.60658359527588	-1.49874305725098	1.75370025634766	-2.01981925964355	-2.79262733459473	-8.12279033660889	-0.472383499145508	-8.10555362701416	-3.76177310943604	1.91754531860352	3.33598136901855	3.78298568725586	0.832647323608398	-3.0064754486084	2.50324821472168	-3.87506008148193	-6.60649347305298	-2.98025131225586	-8.99921894073486	0.55428409576416	-2.04971694946289	-4.47276496887207	-0.0229721069335938	-0.271272659301758	-0.427028656005859	-0.522068023681641	-2.96347999572754	-1.80268478393555	1.3359956741333	-5.26913833618164	-3.25107002258301	-3.76338195800781	-2.30721664428711	-6.34559154510498	-2.90300846099854	-1.30862236022949	-0.461812973022461	-9.92454051971436	-1.41162395477295	-0.722104072570801	-6.31761264801025	-1.48206901550293
666	E2ALP2;XP_011260424.1		0.297476	0.789452	-0.369674	-0.145056	tr|E2ALP2|E2ALP2_CAMFO Peptidase_M28 domain-containing protein OS=Camponotus floridanus (Florida carpenter ant) OX=104421 GN=EAG_10908 PE=4 SV=1;|XP_011260424.1 carboxypeptidase Q [Camponotus floridanus]	2.18188953399658	1.46255683898926	-0.0621662139892578	-2.04196548461914	2.70633316040039	-1.93029594421387	-1.76967620849609	-0.491353988647461	0.579861640930176	-1.96173667907715	0.333806991577148	-0.521511077880859	1.6851634979248	-0.638078689575195	-3.51784515380859	-0.481188774108887	-1.61217308044434	1.93067169189453	-1.85184097290039	2.295334815979	2.05638885498047	-2.2902717590332	-0.793214797973633	-0.292552947998047	0.242038726806641	-0.857284545898438	1.32368659973145	1.72000694274902	-0.500496864318848	-2.40117263793945	1.60665702819824	0.529008865356445	-0.103231430053711	0.406790733337402	1.97889995574951	3.65153503417969	1.44737434387207	-0.772882461547852	1.81294345855713	-0.0133886337280273	-2.22442531585693	1.54704475402832
667	E2ALS8;XP_019883851.2		0.86421	0.405433	1.19457	0.428625	tr|E2ALS8|E2ALS8_CAMFO Aminopeptidase N OS=Camponotus floridanus (Florida carpenter ant) OX=104421 GN=EAG_10592 PE=4 SV=1;|XP_019883851.2 LOW QUALITY PROTEIN: aminopeptidase N [Camponotus floridanus]	2.79201602935791	1.29057502746582	0.00555038452148438	-0.0563240051269531	4.5020751953125	-1.4040355682373	1.67946624755859	-4.01315879821777	-0.179764747619629	-2.50982475280762	-0.262517929077148	0.960857391357422	3.4262752532959	-3.64362335205078	-5.05995178222656	-0.140877723693848	-1.48327445983887	3.0394172668457	-2.63103485107422	1.07926845550537	2.3429012298584	-3.50479698181152	3.40060806274414	1.58432006835938	-1.13577461242676	-3.82297325134277	-3.29669189453125	3.03514862060547	-1.73460483551025	-2.25746726989746	2.80955505371094	0.322868347167969	0.625015258789063	0.416199684143066	2.56592273712158	4.05974769592285	2.79457473754883	-0.249555587768555	4.07089710235596	0.776913642883301	-0.728970527648926	1.86796760559082
678	XP_011260763.1;E2AMD6;XP_011260762.1		0.184001	0.788656	-0.489545	-0.158615	tr|E2AMD6|E2AMD6_CAMFO Malic enzyme OS=Camponotus floridanus (Florida carpenter ant) OX=104421 GN=EAG_04942 PE=3 SV=1;|XP_011260762.1 NADP-dependent malic enzyme isoform X1 [Campo	-5.14677143096924	-4.56390380859375	-0.49140739440918	-3.0464916229248	-7.24927663803101	-1.5382080078125	-4.36505317687988	1.57939910888672	-9.24196243286133	-1.01860237121582	-6.89735984802246	0.956703186035156	-5.99062347412109	1.95974922180176	-5.42211675643921	-1.6097993850708	-2.35052680969238	-8.37558937072754	-5.9944314956665	-6.11264848709106	-1.36381721496582	0.702507019042969	-4.45216941833496	-6.26944541931152	-0.417568206787109	-1.03954887390137	-1.59402465820313	-0.940164566040039	-3.43319225311279	-1.95905876159668	-9.46104526519775	-2.84889030456543	-1.40966606140137	0.708529472351074	-5.67484951019287	-2.19438743591309	-5.3584156036377	-0.408222198486328	1.29473400115967	-0.251894950866699	-9.55690479278564	-7.42270088195801
690	XP_011260972.1;E2AMV4		0.920014	0.370039	1.40913	0.487927	tr|E2AMV4|E2AMV4_CAMFO HATPase_c domain-containing protein OS=Camponotus floridanus (Florida carpenter ant) OX=104421 GN=EAG_01853 PE=3 SV=1	-0.110514640808105	-0.073944091796875	-2.35800361633301	0.489336013793945	-2.97261810302734	-8.90427494049072	-2.46607780456543	-3.78474044799805	-6.64419555664063	-4.30275535583496	-6.14047050476074	-7.84074783325195	-1.5219783782959	-5.14149856567383	-3.25581359863281	-6.16587734222412	-2.11312866210938	0.0227928161621094	-7.10349369049072	-1.13688564300537	0.323793411254883	-4.84100532531738	-0.503244400024414	-0.692619323730469	-4.32556009292603	-7.22791910171509	-2.84795951843262	-1.73538398742676	-2.22172260284424	-8.24244785308838	-2.45534706115723	-7.72328567504883	-5.80856895446777	-4.82133197784424	-7.11714553833008	-8.16975402832031	-4.16404342651367	-7.67950105667114	-2.48421001434326	-8.07641983032227	-3.3626012802124	0.00464248657226563
691	XP_011260992.1;E2AMW3		0.0462002	0.954717	0.130906	0.0432626	tr|E2AMW3|E2AMW3_CAMFO Cathepsin L OS=Camponotus floridanus (Florida carpenter ant) OX=104421 GN=EAG_01862 PE=3 SV=1	0.0643072128295898	0.109714508056641	-6.39076280593872	-4.99613380432129	-6.69215822219849	-7.6712327003479	0.204187393188477	-8.9285717010498	-2.86814212799072	-1.95177841186523	-0.605375289916992	1.17776298522949	0	-7.84331703186035	-2.25103378295898	2.66952991485596	-1.91216087341309	-1.32522773742676	-3.35259056091309	0.390215873718262	-1.71530342102051	1.50789833068848	0.429893493652344	-0.770050048828125	-0.440263748168945	-1.13730239868164	-1.47673988342285	-5.0440616607666	-0.967873573303223	-8.30009174346924	-1.14482688903809	-6.61568880081177	-0.675693511962891	-7.50709581375122	-1.94473934173584	0.847766876220703	-2.91480255126953	-5.931480884552	-1.52319240570068	-8.03654956817627	-2.5789155960083	-1.46021270751953
703	XP_011261399.1;E2ANT2		0.146498	0.866348	0.333294	0.114847	tr|E2ANT2|E2ANT2_CAMFO Vitellogenin OS=Camponotus floridanus (Florida carpenter ant) OX=104421 GN=EAG_14638 PE=4 SV=1	-4.259596824646	-6.66705703735352	-5.08373975753784	-2.62974548339844	-4.05573463439941	-4.74320507049561	-4.8150463104248	-1.47298431396484	-2.4868745803833	-6.93673515319824	-7.31487607955933	-9.14870262145996	-6.86774444580078	-5.52521419525146	1.12824630737305	-4.74260234832764	-7.2923150062561	-6.12038230895996	-5.07274341583252	-5.08414363861084	-6.797119140625	-3.03543281555176	-5.19656372070313	-4.73058319091797	-4.53899478912354	-6.83537292480469	-3.43893241882324	-7.84537506103516	-0.671511650085449	-7.01337480545044	-9.28468036651611	-5.37199974060059	-10.9873523712158	-9.29025650024414	-7.68374156951904	-4.51291084289551	-6.68407964706421	-8.02338886260986	3.64902591705322	-3.12692737579346	-8.70544719696045	-6.03018712997437
710	XP_011261591.1;E2AP90		0.18662	0.794636	0.442413	0.148965	tr|E2AP90|E2AP90_CAMFO Vacuolar proton pump subunit B OS=Camponotus floridanus (Florida carpenter ant) OX=104421 GN=EAG_05177 PE=3 SV=1	-0.363717079162598	0.0497322082519531	-1.88191223144531	0.167211532592773	-1.38641738891602	0.857162475585938	-0.557586669921875	0.0320758819580078	-3.13947010040283	-4.48464012145996	-2.87469482421875	-5.89942932128906	-1.17531204223633	-8.68119812011719	-3.02616310119629	-2.32542324066162	6.08448791503906	-3.25751686096191	-8.70967292785645	-2.75590801239014	-0.499971389770508	-3.10686492919922	0.836215972900391	-2.11551475524902	-2.60501480102539	-8.66984176635742	-2.47800636291504	-0.463663101196289	-6.4185905456543	-7.96849536895752	2.33385848999023	-3.13395309448242	-2.552001953125	-5.28591394424438	-2.51892185211182	-5.12454986572266	-3.95582580566406	-1.03112411499023	0.583355903625488	-4.99110841751099	-3.14420032501221	-0.28590202331543
714	XP_011261637.1;E2APC4		1.17212	0.267684	-1.68871	-0.582629	tr|E2APC4|E2APC4_CAMFO Myosin-IA OS=Camponotus floridanus (Florida carpenter ant) OX=104421 GN=EAG_08849 PE=3 SV=1	-6.86107158660889	-1.64748382568359	-4.11910629272461	-6.80762100219727	-2.81793975830078	-0.812088012695313	-5.80209445953369	0.463888168334961	-9.48085117340088	-2.65603446960449	-3.5376148223877	-7.92691326141357	-7.24038314819336	-1.01731491088867	-3.75812721252441	-1.27995204925537	-0.0285663604736328	-1.62621879577637	-9.62215042114258	-1.59451389312744	-4.09524536132813	-9.67941665649414	-0.513774871826172	-6.01631546020508	-2.0201587677002	-1.19700813293457	-0.0637912750244141	-5.32475852966309	-1.43063831329346	-0.571868896484375	-5.05132865905762	0	-1.07274436950684	-2.27511119842529	-5.09571743011475	-1.68988800048828	-7.77828979492188	-2.82587432861328	-0.0132970809936523	-2.08864498138428	-1.26315402984619	-2.71294021606445
737	E2AQI6;XP_011262241.1;XP_011262243.1;XP_011262250.1;XP_019884226.1;XP_011262249.1;XP_011262248.1;XP_011262247.1;XP_011262246.1;XP_011262245.1;XP_011262244.1		0.0472152	0.958152	0.134408	0.0443341	tr|E2AQI6|E2AQI6_CAMFO Glucosamine--fructose-6-phosphate aminotransferase [isomerizing] 2 OS=Camponotus floridanus (Florida carpenter ant) OX=104421 GN=EAG_12078 PE=4 SV=1;|XP_011262241.1 uncharacterized protein LOC105254948 [Camponotus floridanus]	2.78060817718506	1.53142738342285	-0.716075897216797	-0.368707656860352	2.35143089294434	-2.11157608032227	-1.94294166564941	-4.88613033294678	1.54527568817139	-1.67030906677246	-6.89202880859375	-3.32658004760742	2.05858039855957	-3.6061954498291	-4.3009033203125	-3.95438098907471	-0.415920257568359	2.22763633728027	-3.18761253356934	2.3654260635376	0.254959106445313	-1.49831771850586	-5.6304931640625	-3.62833023071289	-1.62717247009277	-9.21783065795898	-2.64505958557129	1.59972763061523	2.51013469696045	-6.58846235275269	0.948383331298828	-2.64441299438477	2.0430793762207	-0.435891151428223	0.936944007873535	2.76872062683105	0.650728225708008	-1.2037525177002	-7.96327877044678	-3.47078418731689	-4.60566234588623	2.46130561828613
743	XP_011262417.1;E2AQX7;CON__ENSEMBL:ENSBTAP00000025008		1.14509	0.24825	1.86383	0.619679	tr|E2AQX7|E2AQX7_CAMFO Tubulin beta chain OS=Camponotus floridanus (Florida carpenter ant) OX=104421 GN=EAG_08224 PE=3 SV=1	-0.642647743225098	0.957651138305664	-0.000650405883789063	0.100658416748047	-1.12683868408203	-8.28552436828613	-0.222200393676758	-0.639251708984375	-3.4091215133667	-2.8891429901123	-2.29096603393555	-1.98297119140625	-0.644313812255859	-9.44255924224854	1.06856727600098	-1.22361660003662	-2.76993751525879	-3.74151420593262	-2.970458984375	-1.0495138168335	0.31419563293457	-7.8333854675293	-2.06771469116211	-1.03749465942383	-6.17569255828857	-2.39705657958984	-3.35532379150391	-1.28400230407715	-0.15132999420166	-9.80396461486816	-2.52000999450684	-6.34298038482666	-9.61253070831299	-7.58826780319214	-9.53671741485596	-3.27323722839355	-1.91032028198242	-9.37592124938965	-1.0562047958374	-2.05636501312256	-3.81898593902588	-0.535978317260742
758	XP_011262697.2;E2ARG4;E2A6I8;XP_011252363.1;XP_011252362.1		1.6042	0.162462	2.02975	0.706843	tr|E2ARG4|E2ARG4_CAMFO Beta-hexosaminidase OS=Camponotus floridanus (Florida carpenter ant) OX=104421 GN=EAG_09586 PE=3 SV=1	0.342288017272949	0.948554992675781	0.752067565917969	0.0962581634521484	2.64526176452637	-5.7231707572937	0.46247673034668	-7.19029712677002	-1.65627574920654	-0.0216770172119141	2.16162872314453	2.85471343994141	2.92115783691406	-3.5470027923584	-1.83454322814941	-2.18785381317139	-4.57915830612183	1.53128051757813	-3.82057571411133	2.27347660064697	1.12580490112305	0.268314361572266	0.584817886352539	1.74345970153809	-2.27895164489746	2.7779655456543	-3.10428810119629	2.13595390319824	0.953734397888184	-0.26849365234375	2.06506729125977	-4.82673835754395	1.19544219970703	-8.05141353607178	0.178389549255371	2.45493316650391	1.48099327087402	-4.64509582519531	-0.153409004211426	1.10837459564209	-3.098069190979	2.26626014709473
761	E2ARH9;XP_011262712.1		1.9657	0.176143	-1.83602	-0.683135	tr|E2ARH9|E2ARH9_CAMFO PA2c domain-containing protein OS=Camponotus floridanus (Florida carpenter ant) OX=104421 GN=EAG_09601 PE=3 SV=1;|XP_011262712.1 phospholipase A2 [Camponotus floridanus]	1.66536617279053	2.33919906616211	3.75969696044922	4.58742713928223	3.50918006896973	6.60340309143066	4.6448802947998	8.08621406555176	5.05200672149658	3.30880928039551	1.38440322875977	-2.12072944641113	1.95732307434082	3.89909934997559	5.68537712097168	3.33069896697998	5.87257957458496	2.48691177368164	4.19144058227539	1.80259990692139	2.20922470092773	4.43274688720703	2.10923385620117	4.07006454467773	5.01834297180176	4.3641300201416	6.7415771484375	-0.495601654052734	4.9967679977417	5.82881927490234	3.75173187255859	4.07082557678223	3.5627384185791	4.34560871124268	3.36766910552979	5.21942901611328	-0.105669021606445	2.45123100280762	-4.01810741424561	6.20497989654541	3.36634540557861	1.40339279174805
763	E2ARJ0;XP_011262743.2		0.0254121	0.979756	-0.0704194	-0.023617	tr|E2ARJ0|E2ARJ0_CAMFO Guanine deaminase OS=Camponotus floridanus (Florida carpenter ant) OX=104421 GN=EAG_03375 PE=4 SV=1	-1.89890384674072	-0.70741081237793	-6.96052885055542	-3.97317504882813	-3.46935844421387	-6.9543604850769	-3.51407241821289	-7.8481502532959	-4.06221866607666	-7.11329746246338	-1.6431770324707	0	0.586385726928711	-4.03741645812988	-6.51743602752686	-1.40804576873779	-6.43242263793945	-0.921173095703125	-4.09177589416504	-1.99744892120361	-6.84533977508545	-2.98724365234375	-1.38949775695801	-2.68650245666504	-1.4504508972168	-8.98078346252441	-2.87579345703125	0.90034294128418	-1.52778911590576	-0.632719039916992	1.71964073181152	2.45074272155762	-2.26045799255371	2.63827800750732	1.63540554046631	1.41578483581543	0.57554817199707	-1.684326171875	-5.86939525604248	-4.00017261505127	0.192770957946777	0.789718627929688
773	XP_019884394.1;XP_011262974.1;E2ARX6		0.181496	0.879649	0.225146	0.0898582	tr|E2ARX6|E2ARX6_CAMFO Voltage-dependent anion-selective channel OS=Camponotus floridanus (Flo	3.8134069442749	4.09419441223145	0.679288864135742	3.82621955871582	1.05479431152344	-0.0494060516357422	1.27048301696777	0.706117630004883	0.67716121673584	3.09720230102539	2.1357364654541	-0.750051498413086	3.91444396972656	2.23341751098633	1.20459747314453	1.73904323577881	1.49092674255371	4.15320777893066	1.0172176361084	3.55368518829346	3.35111045837402	0.943151473999023	2.83575630187988	3.65640449523926	4.75647163391113	0.358160018920898	5.0186939239502	2.46897125244141	4.18935871124268	1.8149471282959	2.40752029418945	3.18627166748047	1.47259902954102	0.62522029876709	3.7087984085083	5.27765464782715	1.35771560668945	4.32281303405762	0.293694496154785	1.30254650115967	4.33719539642334	3.1473274230957
790	XP_011263352.1;E2ASQ5		0.0707277	0.95386	-0.127688	-0.0478298	tr|E2ASQ5|E2ASQ5_CAMFO Uncharacterized protein OS=Camponotus floridanus (Florida carpenter ant) OX=104421 GN=EAG_16430 PE=4 SV=1	0.963412284851074	-1.63474273681641	0.390237808227539	4.92716598510742	3.92985725402832	4.70171356201172	2.35882377624512	5.65323066711426	4.56942462921143	2.05643081665039	0.77276611328125	-0.428050994873047	2.20207023620605	2.74688148498535	2.0712833404541	2.24719333648682	3.0693359375	1.45691299438477	3.49651145935059	-0.480711936950684	1.23584175109863	4.8910961151123	0.559112548828125	4.02827262878418	2.23746490478516	1.17793655395508	1.05288314819336	-3.82179260253906	2.67808437347412	0.672042846679688	-0.0394039154052734	-0.608150482177734	-1.60734939575195	1.68346118927002	0.931149482727051	-0.397216796875	-0.689201354980469	-1.74549293518066	3.16771793365479	2.5835599899292	1.19272708892822	-0.791221618652344
814	E2AU22;XP_019884578.2		0.146417	0.855631	0.32227	0.112185	tr|E2AU22|E2AU22_CAMFO Gamma-interferon-inducible lysosomal thiol reductase OS=Camponotus floridanus (Florida carpenter ant) OX=104421 GN=EAG_15912 PE=4 SV=1;|XP_019884578.2 LOW QUALITY PROTEIN: GILT-like protein 1 [Camponotus floridanus]	-5.03503704071045	-0.6607666015625	1.63956832885742	-1.87934303283691	-3.83403778076172	-0.745473861694336	-3.63337516784668	-6.57503604888916	-2.68944835662842	1.02305030822754	3.26226806640625	4.13411521911621	0.130670547485352	3.55964851379395	-0.912649154663086	-2.14151096343994	-0.00520515441894531	-0.926675796508789	-6.11156368255615	0.357596397399902	-3.11526107788086	-0.562698364257813	-1.11237907409668	0.468406677246094	-1.72664070129395	-0.672416687011719	-1.60305023193359	-0.80851936340332	2.33931064605713	2.86025810241699	-0.121681213378906	0.0853424072265625	-1.35592079162598	-2.99529552459717	2.27660274505615	-3.54741668701172	1.02486419677734	-3.04265594482422	1.48400402069092	-1.62174129486084	-8.62291431427002	-0.0781917572021484
836	E2AV99;XP_011264553.1		2.54592	0.1295	2.43454	0.879893	tr|E2AV99|E2AV99_CAMFO Tr-type G domain-containing protein OS=Camponotus floridanus (Florida carpenter ant) OX=104421 GN=EAG_16395 PE=4 SV=1;|XP_011264553.1 translation elongation factor 2 [Camponotus floridanus]	-2.46763515472412	-2.27293395996094	-3.58270263671875	-2.08802223205566	-1.37927436828613	-8.59649181365967	-6.55179834365845	-8.23873424530029	-8.92838478088379	-3.53748512268066	-3.95474815368652	-3.8007698059082	-2.38122367858887	-6.04526138305664	-1.50006866455078	-3.08078289031982	-7.35956859588623	-3.77774810791016	-9.907057762146	-2.61679553985596	-2.52176284790039	-1.7665843963623	-3.26618194580078	-2.75829887390137	-7.21173048019409	-8.31187057495117	-3.50895118713379	-1.58887481689453	-0.887738227844238	-1.24365043640137	-3.57043838500977	-6.6418833732605	-6.29596710205078	-8.10199165344238	-0.995991706848145	-7.63923072814941	-0.874383926391602	-1.40191459655762	-1.69142055511475	-3.17567539215088	-1.60378932952881	-2.1345100402832
841	XP_011264753.1;E2AVK0		1.46494	0.142476	2.27932	0.749564	tr|E2AVK0|E2AVK0_CAMFO Uncharacterized protein OS=Camponotus floridanus (Florida carpenter ant) OX=104421 GN=EAG_13867 PE=4 SV=1	-7.01004791259766	2.94041061401367	-0.473430633544922	1.54813385009766	-1.83165740966797	1.61004257202148	-2.37788963317871	2.08448028564453	-8.22841835021973	-2.37311553955078	0.343536376953125	-1.93362426757813	-2.83966827392578	-0.635347366333008	0.766195297241211	-2.61952304840088	-9.33127784729004	-7.57732915878296	0.00214767456054688	-1.15675830841064	-2.25686264038086	1.85420227050781	-6.16189670562744	-0.626203536987305	-1.75481224060059	0.041168212890625	-2.35701942443848	-4.10680198669434	-0.514769554138184	-6.38187122344971	-1.45078086853027	-8.52770233154297	-6.77520370483398	-8.60510730743408	-2.06387805938721	-8.47441482543945	-0.677783966064453	-2.6508674621582	-3.6384916305542	-4.84477758407593	-8.19594764709473	-0.0342063903808594
847	XP_011264892.1;XP_011264890.1;E2AVV1		0.354923	0.799706	0.340948	0.1398	tr|E2AVV1|E2AVV1_CAMFO Nucleoplasmin domain-containing protein OS=Camponotus floridanus (Florida carpe	3.93690395355225	3.02629089355469	1.24251937866211	1.81961059570313	3.44046592712402	1.30396842956543	3.08013725280762	-1.27718162536621	2.07602405548096	0.745082855224609	1.95774078369141	3.18342018127441	5.0565071105957	1.66866302490234	1.71784400939941	3.29220485687256	2.20739555358887	2.69027137756348	1.57948112487793	3.79099750518799	1.90653991699219	2.05611228942871	2.63934898376465	3.5201244354248	3.73498916625977	0.834566116333008	4.13814163208008	2.35918998718262	4.57444286346436	2.41559219360352	1.622314453125	3.64568710327148	1.66872978210449	2.72335720062256	4.02455806732178	3.45623207092285	2.80329322814941	1.6032829284668	0.0395841598510742	0.581215858459473	5.97511577606201	2.77242469787598
858	XP_025265510.1;XP_019884763.1;XP_011265197.1;XP_011265195.1;XP_019884762.1;XP_019884761.1;XP_011265194.1;XP_011265193.1;XP_011265191.1;XP_011265190.1;XP_011265189.1;E2AWB0		0.479588	0.57181	-0.775083	-0.277946	|XP_011265197.1 multidrug resistance protein homolog 49 isoform X2 [Camponotu	-5.61898565292358	-2.82402610778809	-4.57482147216797	-5.45997619628906	-7.07502508163452	-1.60503387451172	-3.72319221496582	-5.0060338973999	-8.46446228027344	-1.48666572570801	-5.82888221740723	-6.49506950378418	-5.81557273864746	-3.36691665649414	-3.58338737487793	-2.56508731842041	-7.67795610427856	-3.77157211303711	-9.208420753479	-4.56873226165771	-7.26353931427002	-9.26808834075928	0.177663803100586	-5.55931663513184	-3.91311454772949	-9.670334815979	-1.55981826782227	-7.33132743835449	-3.53277111053467	-9.76937294006348	-7.22586250305176	-4.45776557922363	-2.5795955657959	-2.85617923736572	-5.21925449371338	-0.725709915161133	-5.52623558044434	-4.58424758911133	-3.82769107818604	-6.47668743133545	-8.33290481567383	-6.31829071044922
874	E2AX18;XP_011265519.1;XP_011265517.1		0.787554	0.43287	-1.1582	-0.411366	tr|E2AX18|E2AX18_CAMFO Glutathione S-transferase OS=Camponotus floridanus (Florida carpenter ant) OX=104421 GN=EAG_01201 PE=3 SV=1;|XP_011265519.1 glutathione S-transferase-like [Camponotus floridanus]	-4.98183727264404	0.576919555664063	2.13315010070801	1.85788726806641	0.933664321899414	4.45448875427246	1.36128997802734	4.48453903198242	1.64799213409424	0.251834869384766	-0.448041915893555	-3.73363876342773	-6.37546539306641	3.10702705383301	1.99480247497559	0.533465385437012	3.65615272521973	0.204757690429688	3.16411209106445	-0.267325401306152	1.64349555969238	2.25199890136719	-1.2584114074707	-2.98908424377441	1.61650657653809	0.893234252929688	1.5594539642334	-3.18788528442383	1.12869739532471	0.671228408813477	2.49792861938477	0.0102367401123047	-0.0549678802490234	-3.47950649261475	-0.861233711242676	-4.40751075744629	-1.85176277160645	0.819858551025391	-1.91534900665283	-2.83210849761963	1.938157081604	-2.54925918579102
879	E2AX77;XP_025264787.1;XP_025264786.1;XP_025264785.1;XP_025264784.1;XP_025264782.1;XP_011265555.2;XP_011265554.2;XP_011265551.2		0.0541793	0.94915	0.121448	0.0430957	tr|E2AX77|E2AX77_CAMFO Probable chitinase 1 OS=Camponotus floridanus (Florida carpenter ant) OX=104421 GN=EAG_01712 PE=4 SV=1;|XP_02526	-7.28478145599365	-4.58175849914551	-3.77573776245117	-6.17498970031738	-7.53514909744263	0.511409759521484	-2.59807014465332	-8.17423915863037	-4.45595455169678	-0.796463012695313	1.8845386505127	2.15478515625	-1.59830474853516	-3.4669246673584	-3.52370643615723	-2.98006916046143	-2.08933639526367	-3.22654914855957	-7.3944616317749	0.298678398132324	-5.99079513549805	-8.78468036651611	-1.36730194091797	-4.25319290161133	-1.12654113769531	-3.12610816955566	-2.40209007263184	-2.32919120788574	-3.48304080963135	-1.63981246948242	-5.20840835571289	-2.45717239379883	-1.63223266601563	-1.56811237335205	-4.07973384857178	-1.8518009185791	-2.45877456665039	-7.01735973358154	-2.99734592437744	-1.06227970123291	-3.17832279205322	-5.02616500854492
895	E2AY06;XP_011266013.1		0.288392	0.745056	0.49225	0.17906	tr|E2AY06|E2AY06_CAMFO Peptidase_M14 domain-containing protein OS=Camponotus floridanus (Florida carpenter ant) OX=104421 GN=EAG_12714 PE=4 SV=1;|XP_011266013.1 carboxypeptidase B [Camponotus floridanus]	0.163754463195801	-1.38555908203125	3.2465763092041	-5.61840057373047	-0.622915267944336	-6.44611024856567	-0.34929084777832	-0.968772888183594	-1.34795665740967	0.66346549987793	2.83130836486816	2.63523292541504	0.479530334472656	-7.29826736450195	-0.59324836730957	0.836773872375488	0.790699005126953	0.78245735168457	-2.11062049865723	2.38743495941162	-1.64703559875488	-2.09603500366211	0.786787033081055	0.989286422729492	-1.28659057617188	1.12093925476074	1.79960250854492	-0.724575042724609	-1.81701946258545	1.52885627746582	-3.54160118103027	-3.3634204864502	1.96088218688965	-0.067805290222168	-2.049880027771	-0.492410659790039	0.906221389770508	0.0465431213378906	1.97334957122803	-2.54424571990967	0.930914878845215	-1.1920051574707
923	E2AZ59;XP_011266628.1		1.32951	0.403026	-1.0012	-0.402336	tr|E2AZ59|E2AZ59_CAMFO Peptidase A1 domain-containing protein OS=Camponotus floridanus (Florida carpenter ant) OX=104421 GN=EAG_08757 PE=3 SV=1;|XP_011266628.1 lysosomal aspartic protease [Camponotus floridanus]	7.49117565155029	8.40501403808594	9.21159934997559	7.40230751037598	8.09938430786133	10.64430809021	9.68611907958984	11.1688671112061	10.1910429000854	10.0289840698242	8.03639221191406	5.23214530944824	7.10865020751953	10.4457664489746	9.20590209960938	10.3241567611694	12.0800037384033	8.80628967285156	8.92532348632813	9.16101741790771	8.97096633911133	10.2330188751221	9.56707954406738	8.51370048522949	10.4228000640869	8.82345008850098	9.10363578796387	4.97728538513184	9.26491260528564	10.0727195739746	7.04747200012207	9.96601104736328	8.53144836425781	9.86668682098389	8.28971195220947	8.65857315063477	7.31145668029785	8.29730987548828	4.77606105804443	9.7568883895874	9.90376567840576	6.48488998413086
931	XP_011266818.1;E2AZK6;XP_011266817.1		0.548392	0.573414	-0.791053	-0.290085	tr|E2AZK6|E2AZK6_CAMFO Sulfatase domain-containing protein OS=Camponotus floridanus (Florida carpenter ant) OX=104421 GN=EAG_15528 PE=4 SV=1;|XP_011266817.1 arylsulfatase B isoform X1 [Campon	-3.86877727508545	0.838102340698242	-0.556608200073242	0.601737976074219	-7.23414707183838	5.27530097961426	-0.30787467956543	3.71446228027344	-0.59221363067627	0.244718551635742	0.881374359130859	-0.0924568176269531	-0.247451782226563	1.63823509216309	-2.09307098388672	1.61658191680908	4.59346008300781	1.38479804992676	0.35032844543457	-0.416666984558105	0.378265380859375	2.28385162353516	0.269216537475586	0.182077407836914	-0.0102558135986328	0.402053833007813	-0.722856521606445	-2.65494155883789	-2.79364681243896	-1.39720726013184	-2.81111145019531	0.0555858612060547	-4.29057502746582	-0.218363761901855	-1.40632915496826	0.58653450012207	-0.893903732299805	-2.61944198608398	-2.32752132415771	-0.102873802185059	-2.98311901092529	-2.31665229797363
936	XP_011266934.1;E2AZT6		1.21642	0.379094	1.2675	0.476989	tr|E2AZT6|E2AZT6_CAMFO Laminin subunit alpha OS=Camponotus floridanus (Florida carpenter ant) OX=104421 GN=EAG_15041 PE=4 SV=1	-5.40855884552002	-3.95599555969238	-3.56961441040039	-6.33983039855957	-5.56461334228516	-4.528977394104	-3.4217529296875	-6.02689599990845	-4.63018703460693	-3.53309059143066	-2.71923637390137	-2.7773380279541	-2.4222240447998	-10.7041540145874	-1.95707511901855	-9.63654804229736	-9.64721775054932	-4.52568817138672	-6.62627696990967	-5.00318431854248	-3.8676586151123	-6.15479278564453	-10.9149990081787	-3.74691009521484	-3.30048751831055	-3.54241752624512	-6.964768409729	-4.74930763244629	-4.98879718780518	-7.13559532165527	-4.74127388000488	-6.48750591278076	-8.07523441314697	-7.19251871109009	-5.47301387786865	-3.76316261291504	-5.21057891845703	-7.46259260177612	-5.60838031768799	-5.12980318069458	-4.52248668670654	-4.10830688476563
943	XP_011267179.1;E2B0D3		0.608136	0.552681	0.837319	0.308719	tr|E2B0D3|E2B0D3_CAMFO Protein FAM151A OS=Camponotus floridanus (Florida carpenter ant) OX=104421 GN=EAG_12328 PE=4 SV=1	0.832627296447754	0.139328002929688	-0.948968887329102	0.310846328735352	0.276082992553711	-0.20515251159668	1.20633888244629	-9.28341388702393	-1.45525455474854	-1.81532096862793	-0.102907180786133	0.94146728515625	2.42425346374512	-7.24060487747192	-3.32680702209473	-0.354239463806152	-1.18732833862305	-0.518030166625977	-2.17201232910156	0.330451011657715	-1.30347061157227	-1.47368049621582	-1.00968933105469	2.31677436828613	0.750619888305664	0.545652389526367	1.15767478942871	0.0679435729980469	0.123026847839355	-0.310153961181641	-0.871206283569336	-0.372142791748047	0.856300354003906	1.49579334259033	2.63075542449951	2.6208381652832	0.385610580444336	0.0209846496582031	-1.14402484893799	-2.80445003509521	-2.31939029693604	1.3890495300293
950	E2B123;XP_025270483.1;XP_011267482.1		0.00060256	0.998721	-0.00159296	-0.000547195	tr|E2B123|E2B123_CAMFO MFS domain-containing protein OS=Camponotus floridanus (Florida carpenter ant) OX=104421 GN=EAG_15098 PE=3 SV=1;|XP_011267482.1 facilitated treha	-8.35071086883545	-2.13438415527344	-8.32718658447266	-1.20481491088867	-7.04321718215942	-0.349899291992188	-6.75162887573242	0.0131511688232422	-8.03279113769531	-7.75318431854248	-6.85634422302246	-3.36252784729004	-3.62711906433105	-1.79149436950684	-7.70341777801514	-1.15615367889404	-2.18356704711914	-7.86248254776001	-3.28014183044434	-4.10075283050537	-2.0024356842041	0.832113265991211	-0.166332244873047	-7.09751319885254	-1.27662658691406	-4.01659774780273	-2.8305549621582	-0.416187286376953	-3.19024753570557	-1.69854354858398	-1.82718086242676	-1.32658195495605	-2.72686386108398	-0.781622886657715	-2.86156177520752	-2.06747436523438	-1.69045066833496	-3.55397033691406	2.99376583099365	-1.57097339630127	-3.50563526153564	-1.94836235046387
958	XP_011267621.1;E2B1B7		0.0315059	0.985855	-0.0433623	-0.0174092	tr|E2B1B7|E2B1B7_CAMFO Proactivator polypeptide OS=Camponotus floridanus (Florida carpenter ant) OX=104421 GN=EAG_12476 PE=4 SV=1	-2.32993030548096	-1.56461906433105	-2.49755096435547	-1.94374084472656	-3.50717353820801	-1.45099639892578	-2.25057983398438	-1.19110679626465	-8.31217098236084	-2.94009590148926	-2.39396858215332	-1.9111213684082	-0.397436141967773	-1.39905166625977	-0.979930877685547	-1.00750255584717	-3.0284538269043	-1.9835376739502	-5.22487354278564	-1.40222072601318	-2.45388793945313	-2.7297534942627	-1.30125045776367	-0.580678939819336	-0.132558822631836	-4.17879104614258	0.264827728271484	-3.71464920043945	-0.137236595153809	-1.75136756896973	-2.24628448486328	-1.77191734313965	-1.24352645874023	-0.649029731750488	0.0667333602905273	-1.28017807006836	-2.59977722167969	-1.33269309997559	-2.07958126068115	-2.90487384796143	-1.6028470993042	-1.78470420837402
974	E2B227;XP_011267964.1		0.76984	0.398886	1.12874	0.401988	tr|E2B227|E2B227_CAMFO Tetraspanin OS=Camponotus floridanus (Florida carpenter ant) OX=104421 GN=EAG_04362 PE=3 SV=1;|XP_011267964.1 23 kDa integral membrane protein [Camponotus floridanus]	2.15627956390381	2.90437698364258	1.69753456115723	2.12239456176758	2.71887016296387	-0.0233726501464844	3.13070106506348	-6.21453237533569	1.14523792266846	-1.20241546630859	2.70950698852539	1.95952033996582	3.58338356018066	-8.46463203430176	1.38764953613281	2.67839336395264	0.560678482055664	2.99283981323242	0.202003479003906	1.19749164581299	1.85199165344238	-1.63994216918945	5.87729835510254	3.67263221740723	-0.233125686645508	-3.04746246337891	2.19338607788086	1.34671020507813	0.96280574798584	0.240398406982422	1.89013290405273	2.29143905639648	2.08498954772949	4.64252758026123	1.79087352752686	2.13085174560547	1.53488159179688	1.4222526550293	4.0000638961792	-0.379137992858887	-0.541789054870605	2.61719131469727
979	E2B271;XP_011268025.2		0.577732	0.431388	1.11939	0.374471	tr|E2B271|E2B271_CAMFO Uncharacterized protein OS=Camponotus floridanus (Florida carpenter ant) OX=104421 GN=EAG_03191 PE=4 SV=1;|XP_011268025.2 pheromone-binding protein Gp-9 [Camponotus floridanus]	-5.58585071563721	-4.12753486633301	0.488807678222656	1.69165992736816	-0.163059234619141	-9.02896976470947	-3.18361854553223	-3.22813415527344	-1.66905117034912	-2.15885353088379	-0.874231338500977	-0.664634704589844	-2.00156784057617	-9.86596775054932	1.57580184936523	-4.27421855926514	-2.00738716125488	-5.32377433776855	1.40327644348145	-4.12533283233643	-3.09988403320313	1.05332183837891	-8.90617179870605	-4.45832633972168	-2.21866035461426	-1.82923126220703	-5.25028228759766	-6.068603515625	-1.16072559356689	-3.38535499572754	-4.98843193054199	-3.67209053039551	-3.38556480407715	-8.17214584350586	-5.9558687210083	-7.8640718460083	-2.46338844299316	-5.32723760604858	0.651917457580566	-5.04231834411621	-7.99963665008545	-6.72793197631836
1028	XP_011252309.2;E2A6E2		1.70398	0.146667	2.63082	0.852888	tr|E2A6E2|E2A6E2_CAMFO Protein G12 OS=Camponotus floridanus (Florida carpenter ant) OX=104421 GN=EAG_09917 PE=4 SV=1	-0.559878349304199	-3.87380790710449	1.41094398498535	-0.887815475463867	2.94567680358887	-6.32904195785522	-6.81659173965454	-9.07701301574707	-0.00931453704833984	-7.28573226928711	-1.76937866210938	-0.530290603637695	0.981256484985352	-9.11085414886475	-3.79515647888184	-0.894890785217285	-0.915887832641602	-2.61289215087891	-3.77065086364746	-0.215292930603027	-1.04754638671875	2.13138008117676	-2.33846092224121	-0.617813110351563	-2.27624320983887	-4.51920127868652	-5.37981367111206	2.36564254760742	-0.0367326736450195	-6.84737873077393	0.844961166381836	-4.4051685333252	-6.56478929519653	-3.83092021942139	1.23823833465576	-0.153884887695313	2.42372131347656	2.71047782897949	6.22006511688232	3.09832859039307	-1.3889799118042	2.71854972839355
1030	XP_011252500.2;E2A6T2		1.61779	0.380154	-1.20783	-0.480119	|XP_011252500.2 protein CREG1 [Camponotus floridanus]	10.2709913253784	10.8404560089111	12.128963470459	9.80205535888672	11.1790332794189	13.7976684570313	11.3360042572021	13.6828727722168	12.5811796188354	12.7502117156982	10.6333599090576	7.06621932983398	8.61223220825195	13.5680160522461	11.692440032959	12.1165723800659	14.9616317749023	11.4394626617432	11.6086616516113	11.9828519821167	11.2471885681152	11.9384155273438	12.2068767547607	10.3458404541016	12.8789844512939	11.5624656677246	11.9619007110596	7.52728652954102	11.6395425796509	12.4869289398193	9.93692398071289	12.6607360839844	11.3397369384766	12.517746925354	10.5792303085327	11.6316890716553	9.70921897888184	11.5963821411133	7.20154476165771	12.8096284866333	12.0071249008179	8.81471633911133
1031	XP_011252932.2;E2A7K7		0.605836	0.58071	0.703694	0.270625	tr|E2A7K7|E2A7K7_CAMFO Apolipophorins OS=Camponotus floridanus (Florida carpenter ant) OX=104421 GN=EAG_00653 PE=4 SV=1	2.02529621124268	3.18315696716309	5.67823028564453	4.21337509155273	4.40310478210449	1.87068367004395	5.34542655944824	5.73111343383789	3.9328145980835	5.39577674865723	5.84755897521973	5.25435447692871	2.7758731842041	2.62104797363281	8.38774871826172	3.89992809295654	3.73586463928223	2.95025444030762	4.7938404083252	3.30065250396729	3.15492820739746	4.66177368164063	3.19967079162598	4.11892127990723	1.29808807373047	2.46828651428223	1.38460540771484	1.37996101379395	4.08570384979248	0.700401306152344	1.23863792419434	0.655914306640625	0.360403060913086	1.00002384185791	1.44163417816162	0.811870574951172	3.12421035766602	-0.0793495178222656	5.03188419342041	4.51401805877686	0.953137397766113	1.11469268798828
1039	XP_011253495.1;E2A8P0		1.37067	0.376889	-1.22935	-0.475128	tr|E2A8P0|E2A8P0_CAMFO Deoxyribonuclease-2-alpha OS=Camponotus floridanus (Florida carpenter ant) OX=104421 GN=EAG_14030 PE=4 SV=1	1.81347560882568	3.66841697692871	4.59573554992676	3.48579788208008	3.83756637573242	5.97172355651855	4.55777931213379	3.43863296508789	5.1008996963501	5.68132400512695	3.29623603820801	-2.26647186279297	2.1895580291748	5.2142219543457	4.12905883789063	5.31584072113037	6.6541576385498	4.39519691467285	4.16978073120117	3.03814601898193	3.92932510375977	5.38439559936523	4.6780948638916	3.0879020690918	6.75211906433105	4.45090675354004	7.25089836120605	1.11764717102051	5.71374416351318	6.47418212890625	3.75458526611328	5.56904792785645	5.51952362060547	5.89378261566162	4.82284641265869	5.06182098388672	2.90378379821777	3.77864074707031	-0.711777687072754	7.49921321868896	5.31812381744385	3.35723876953125
1045	XP_011254133.1;E2A9W2		1.8035	0.134526	-2.22844	-0.772616	tr|E2A9W2|E2A9W2_CAMFO Thioredoxin domain-containing protein OS=Camponotus floridanus (Florida carpenter ant) OX=104421 GN=EAG_08823 PE=3 SV=1	0.477896690368652	1.11530685424805	1.31469345092773	0.502265930175781	-2.11627197265625	3.16329002380371	-5.76459407806396	4.15355491638184	-3.44148921966553	-6.76051950454712	-2.75882530212402	-4.48260116577148	-0.856733322143555	3.93657684326172	0.731779098510742	1.57372379302979	2.96783256530762	1.41917037963867	-8.2913932800293	-0.434082984924316	2.20927238464355	-4.29372215270996	-0.686977386474609	-1.12558174133301	3.00767135620117	1.44146156311035	1.64615249633789	0.407075881958008	2.63146686553955	3.33626365661621	0.675592422485352	2.11264038085938	1.68709182739258	2.89354038238525	2.0901517868042	1.54351806640625	0.98457145690918	2.84309387207031	-0.542080879211426	1.84921741485596	2.55625247955322	0.277921676635742
1046	XP_011254210.2;XP_011254209.2;E2AA04		0.882134	0.378621	1.32648	0.463609	tr|E2AA04|E2AA04_CAMFO SERPIN domain-containing protein OS=Camponotus floridanus (Florida carp	-1.41693019866943	-1.36733245849609	1.82472801208496	-1.67103004455566	-1.64862823486328	-5.09849452972412	-0.274969100952148	-3.79168510437012	0.430869102478027	1.52189636230469	2.75046348571777	2.06041145324707	-0.435886383056641	-4.24704933166504	3.32558631896973	-2.85317325592041	-1.52971076965332	-0.923616409301758	-2.17717361450195	-0.071925163269043	-1.31637382507324	-2.64011383056641	-0.72587776184082	-0.429738998413086	-1.1351490020752	-0.73320198059082	-1.24831962585449	-1.74654197692871	-0.167521476745605	-0.800392150878906	-2.01604270935059	-11.0635995864868	-1.4197998046875	-8.45172500610352	-1.95036602020264	-2.3677978515625	-0.987514495849609	-2.7967472076416	-1.54658985137939	-2.99748134613037	-8.8143835067749	-2.0711727142334
1051	XP_011255281.1;E2AC28;E2AC29		0.336466	0.562147	-1.01997	-0.30266	tr|E2AC28|E2AC28_CAMFO GMC_OxRdtase_N domain-containing protein OS=Camponotus floridanus (Florida carpenter ant) OX=104421 GN=EAG_13496 PE=4 SV=1	-7.00231552124023	-6.77445602416992	-7.24195957183838	-0.444082260131836	-2.38989448547363	-8.58010292053223	-4.78438186645508	-1.86301612854004	-9.20431613922119	1.95976638793945	2.37211799621582	0.27592658996582	-3.61019325256348	-8.63015842437744	-0.654170989990234	-1.77871608734131	-0.317184448242188	-2.59924507141113	-3.24287414550781	-2.02992916107178	-2.58371353149414	1.82332801818848	-8.07849216461182	2.93150901794434	4.56499099731445	5.61508560180664	2.13068199157715	-0.095977783203125	2.41442394256592	4.44118881225586	-0.718910217285156	3.1732006072998	4.88443565368652	4.34140491485596	2.35692310333252	5.58395195007324	0.556379318237305	3.37707328796387	0.914410591125488	6.28943538665771	-0.646130561828613	1.91367149353027
1054	XP_011255562.2		0.763198	0.409263	-1.13996	-0.404091	|XP_011255562.2 peritrophin-48 [Camponotus floridanus]	-0.237837791442871	-3.11076545715332	-0.894229888916016	-1.02321243286133	0.0907230377197266	-1.71362686157227	-5.82339668273926	-1.10977554321289	-2.15520000457764	-3.28190612792969	-4.25972366333008	-3.95559310913086	1.59869003295898	0.405572891235352	-2.68424034118652	-3.09283351898193	-1.39611053466797	-1.08270072937012	-7.54786682128906	-3.28720188140869	-0.708288192749023	-2.19626235961914	-4.94887542724609	-4.76804161071777	-0.845809936523438	-1.47946357727051	-2.81546974182129	1.72956085205078	-4.09449291229248	-0.367467880249023	1.63739395141602	-6.34323596954346	-1.72653579711914	-1.03781604766846	-2.7739725112915	-0.969320297241211	0.0735683441162109	-4.41759300231934	-7.53281307220459	-9.20138168334961	-4.80289745330811	0.449951171875
1072	XP_011257736.2		0.0578395	0.948564	0.154099	0.0517822	|XP_011257736.2 leucine-rich repeat-containing G-protein coupled receptor 5-like [Camponotus floridanus]	-2.93880939483643	-1.54430961608887	0	0.523563385009766	-0.210901260375977	-8.77795600891113	1.25131797790527	-7.31561994552612	0.350810050964355	2.60505485534668	2.13996505737305	2.34019660949707	0.0323581695556641	0.724954605102539	-0.784706115722656	1.19954586029053	1.28915405273438	1.42485618591309	1.64343070983887	1.08070850372314	-1.07977867126465	0.298614501953125	2.0831470489502	2.31963729858398	4.58413696289063	3.2952880859375	-1.10106658935547	-2.75420761108398	2.11020565032959	4.47849464416504	-3.52714538574219	3.95858764648438	-2.7558650970459	3.44005680084229	0.888249397277832	2.47585868835449	0.221225738525391	-7.5949649810791	0.0132970809936523	3.34009265899658	2.70025157928467	-0.813447952270508
1074	XP_011257802.2;XP_011257800.2		1.97548	0.313191	-1.31158	-0.526825	|XP_011257800.2 regucalcin isoform X1 [Camponotus floridanus]	8.05147838592529	9.0295352935791	10.1418113708496	8.07878112792969	8.61042213439941	10.7965393066406	10.0331707000732	12.3014106750488	10.7879228591919	10.9681453704834	9.0169506072998	5.59494972229004	6.74883270263672	11.321216583252	10.4163627624512	10.7766523361206	12.2563972473145	9.21685409545898	9.89464950561523	9.89210033416748	9.23275375366211	10.7723808288574	10.4910907745361	8.40574836730957	11.7601680755615	10.3643493652344	10.8143100738525	6.30892944335938	10.0941972732544	11.102201461792	8.39837074279785	10.9361152648926	10.2245712280273	11.5672807693481	8.88934230804443	10.3191890716553	7.70886039733887	9.95102310180664	5.75128078460693	11.4182634353638	10.5657835006714	8.24306106567383
1078	XP_011258566.1;XP_011258565.1;E2AIC5		0.463595	0.394667	1.3715	0.399594	tr|E2AIC5|E2AIC5_CAMFO 5-hydroxyisourate hydrolase OS=Camponotus floridanus (Florida carpenter ant)	1.84587955474854	2.37490081787109	2.46755218505859	-0.132486343383789	-0.960678100585938	-7.03178405761719	2.27987480163574	-9.57087230682373	-3.61101245880127	4.02872848510742	4.54976463317871	3.75509262084961	2.57778739929199	-7.70626735687256	5.91487884521484	1.8110990524292	1.62376594543457	2.79345321655273	-1.02783584594727	2.41586399078369	1.78713035583496	-1.7204532623291	1.36428070068359	2.6111946105957	-7.12169551849365	3.5996208190918	-0.519548416137695	1.66692352294922	0.902426719665527	-6.01001119613647	1.38525581359863	-8.58238792419434	-5.55750370025635	-8.70601367950439	2.91257572174072	2.08401679992676	1.8796272277832	0.213376998901367	0.730273246765137	-8.60329532623291	-10.4527034759521	2.29197692871094
1084	XP_011259278.2;E2AJM0;E2ANU0		0.149153	0.873836	-0.256569	-0.0956089	tr|E2AJM0|E2AJM0_CAMFO COesterase domain-containing protein OS=Camponotus floridanus (Florida carpenter ant) OX=104421 GN=EAG_07773 PE=4 SV=1	4.03182506561279	4.68023490905762	5.90633964538574	2.22346115112305	4.7643985748291	7.2725715637207	6.16048240661621	-0.155029296875	5.23162364959717	6.0746955871582	5.60485649108887	2.98269081115723	4.50557327270508	7.71686935424805	4.65385055541992	4.55312824249268	7.57585716247559	4.7704906463623	6.18545722961426	4.34644412994385	5.91806983947754	7.80362892150879	6.24603652954102	6.01423263549805	7.95597267150879	8.18709373474121	6.3017635345459	2.00069999694824	6.67002201080322	2.72253227233887	3.77920532226563	7.68206977844238	1.67801666259766	7.10769367218018	4.88948535919189	5.10301399230957	2.80569267272949	6.25744438171387	0.524476051330566	7.58474254608154	5.500319480896	1.16472053527832
1085	XP_011259279.2		0.231449	0.783723	-0.438002	-0.156444	|XP_011259279.2 venom carboxylesterase-6 [Camponotus floridanus]	0.0808725357055664	0.0660839080810547	1.3802490234375	-4.41408348083496	0.906656265258789	-2.24225044250488	0.542583465576172	-2.60377502441406	1.88679981231689	2.31016159057617	1.13580703735352	-1.82109642028809	0.991626739501953	0.823953628540039	-6.66575717926025	1.94068050384521	2.89576148986816	3.55011558532715	2.34624671936035	2.83531284332275	1.12796211242676	4.04912567138672	1.81117248535156	1.87033653259277	5.45986747741699	3.40140151977539	4.08070945739746	-0.426061630249023	2.97135829925537	4.04264259338379	-0.495250701904297	3.89012718200684	3.82934379577637	2.23688411712646	2.58979892730713	4.62374496459961	1.38726806640625	1.68753242492676	-2.45808124542236	3.5206937789917	2.44569873809814	0.743745803833008
1086	XP_011259281.2		2.27187	0.275238	-1.39637	-0.564263	|XP_011259281.2 uncharacterized protein LOC105253145 [Camponotus floridanus]	6.99015140533447	8.25311088562012	9.34607887268066	6.55373382568359	7.29460144042969	9.70635032653809	8.89682006835938	10.4884986877441	9.3935079574585	9.83259582519531	7.10444641113281	4.35082054138184	6.21210479736328	10.0942230224609	9.08608055114746	8.8732213973999	11.0957679748535	9.28828048706055	8.49294090270996	8.70947170257568	8.16306686401367	9.25743293762207	9.34029960632324	7.73245429992676	10.2920894622803	9.22477531433105	10.5358028411865	5.21696090698242	8.87632274627686	10.3052940368652	7.44531440734863	9.88952827453613	9.225830078125	9.99959278106689	8.32953929901123	9.41597557067871	6.57502365112305	8.98200988769531	4.68733501434326	9.84400844573975	9.76973628997803	6.35736656188965
1087	XP_011259391.1;XP_011259390.1;E2AJT8		1.12772	0.315304	1.49109	0.529734	tr|E2AJT8|E2AJT8_CAMFO Glyco_18 domain-containing protein OS=Camponotus floridanus (Florida carpen	-0.599761009216309	-1.06735992431641	-1.28771209716797	2.24070930480957	-3.10722160339355	-0.403556823730469	-1.3140869140625	-1.49643516540527	-1.55715656280518	2.52222061157227	3.60492134094238	4.39726829528809	2.35529708862305	-1.8422794342041	1.05582427978516	-2.64291477203369	-1.05106925964355	-1.99377250671387	-2.23225593566895	1.72890567779541	-1.45459175109863	-1.61528205871582	-0.748342514038086	0.905605316162109	-1.02641296386719	-0.230716705322266	0.213092803955078	1.03899574279785	2.01041698455811	-8.86372852325439	0.38752555847168	-1.28899765014648	-9.59968280792236	-0.770539283752441	-0.180249214172363	-2.25906562805176	2.02702140808105	-1.44715881347656	2.28269481658936	0.0133886337280273	-2.13646411895752	1.28037643432617
1089	XP_011260293.1;E2ALF0		0.431661	0.580272	0.80551	0.278832	tr|E2ALF0|E2ALF0_CAMFO Ribosomal protein L15 OS=Camponotus floridanus (Florida carpenter ant) OX=104421 GN=EAG_16063 PE=3 SV=1	-2.92671489715576	-0.504978179931641	-1.65294647216797	0.88743782043457	-1.01015663146973	-6.40255689620972	-4.40854644775391	-7.53388404846191	-3.14415836334229	-4.1255989074707	-5.9159984588623	-3.43113899230957	-2.12345314025879	-7.62570095062256	-0.897296905517578	-4.63831424713135	-2.35700798034668	-2.04448509216309	-8.85585021972656	-4.09830760955811	-0.247247695922852	-5.50358390808105	-0.96186637878418	-3.16523742675781	-4.03196144104004	-5.71302270889282	-7.80917882919312	-0.851621627807617	-3.63790607452393	-6.87288475036621	0.125946044921875	-7.99134397506714	-4.77939796447754	-6.40987873077393	-6.71875095367432	-3.89298057556152	-3.33312797546387	-9.64553070068359	-2.49881267547607	-6.6883225440979	-10.2253484725952	-2.86127471923828
1095	XP_011261310.1;XP_011261309.1;XP_011261308.1;XP_011261307.1;XP_011261306.1;E2ANL8		0.464492	0.623544	0.643671	0.240969	|XP_011261308.1 calci	-1.17287921905518	0.507678985595703	2.03536987304688	1.12394523620605	-3.24089241027832	2.84603881835938	0.566488265991211	1.66393089294434	-0.521096229553223	0.811241149902344	-1.25498962402344	-5.33397674560547	-1.09995269775391	0.235176086425781	-1.03583526611328	1.54084491729736	1.81036186218262	-0.87336540222168	-0.0148983001708984	-1.10401821136475	0.457267761230469	-0.262815475463867	0.556306838989258	0.965049743652344	0.58587646484375	-7.69534158706665	0.410684585571289	-2.76055908203125	-0.568211555480957	-0.0652980804443359	-2.28632164001465	-3.66584777832031	-0.904541015625	-1.09238529205322	-2.68446636199951	-1.91701316833496	-0.436172485351563	0.903047561645508	-3.61524295806885	-4.1010217666626	0.26993465423584	-1.74978828430176
1100	XP_011261898.2		2.00393	0.1512	2.82842	0.928652	|XP_011261898.2 alpha-glucosidase [Camponotus floridanus]	-2.99153804779053	-4.79147529602051	1.60663032531738	-3.18185234069824	2.74602890014648	-7.37371349334717	3.13732147216797	-6.86933469772339	3.85528659820557	-2.06537437438965	-2.71612548828125	-1.33916854858398	-3.7944507598877	-5.43045902252197	-3.40171241760254	-9.0367603302002	-5.7224440574646	-4.3076114654541	3.7353572845459	-3.99240016937256	-2.6310920715332	-3.03072738647461	-4.11872673034668	-3.19437217712402	-6.43179273605347	-7.91613245010376	-4.72817325592041	3.90186882019043	-3.39417362213135	-3.91294288635254	-1.72229194641113	-7.95389175415039	-2.28322792053223	-2.16763591766357	-1.9401159286499	-3.46881294250488	1.50757789611816	1.57325172424316	4.83066654205322	1.95974254608154	-2.82561016082764	-0.146551132202148
1109	XP_025263304.1;XP_011263078.2		0.943488	0.40625	-1.19223	-0.43543	|XP_011263078.2 alpha-amylase 1 isoform X1 [Camponotus floridanus]	3.7878885269165	5.48144721984863	2.41616249084473	3.41719245910645	5.66687202453613	1.47841453552246	7.31206512451172	2.17364501953125	6.45836734771729	8.36081886291504	6.6758975982666	2.53691482543945	5.59186935424805	8.3856143951416	3.00198554992676	8.36027431488037	8.76889610290527	7.39943695068359	3.14888381958008	6.84669399261475	4.33784675598145	8.91523742675781	7.42344093322754	6.98271179199219	8.54005813598633	8.4748363494873	8.81001663208008	4.58699417114258	8.43854236602783	9.62479591369629	4.5561408996582	8.77214622497559	9.02502822875977	9.0522928237915	8.10912799835205	8.64338874816895	6.89350509643555	7.76762008666992	3.69714641571045	9.35746669769287	7.961745262146	6.08225250244141
1121	XP_011264019.1;E2AU75		0.923814	0.413387	1.08471	0.404508	tr|E2AU75|E2AU75_CAMFO Myosin_tail_1 domain-containing protein OS=Camponotus floridanus (Florida carpenter ant) OX=104421 GN=EAG_00727 PE=4 SV=1	-0.605517387390137	0.915327072143555	-0.126810073852539	1.78043746948242	-3.6157341003418	0.997926712036133	-1.65330123901367	-0.439094543457031	-6.52055549621582	-2.16104316711426	-2.21907806396484	-5.10548973083496	0.76251220703125	-0.388999938964844	-2.17985343933105	0.107455253601074	0.417631149291992	-2.01445960998535	1.68891716003418	0.071925163269043	2.05988502502441	-2.09458351135254	-2.42983055114746	-0.16899299621582	-0.403980255126953	-3.8582935333252	-1.66559600830078	0.784090042114258	-1.18428897857666	-1.96031188964844	-0.317436218261719	-7.48344612121582	-2.96196746826172	-0.889491081237793	-3.3170919418335	-1.15619659423828	-1.95380973815918	-1.30801963806152	-4.9022741317749	-5.42517948150635	-1.65339756011963	-0.703237533569336
1125	XP_011264385.1		1.67559	0.261714	1.59251	0.597786	|XP_011264385.1 multidrug resistance-associated protein 1 isoform X3 [Camponotus floridanus]	-2.62233829498291	-1.01655197143555	-1.94588851928711	-4.84661102294922	-1.83929252624512	-6.98944759368896	-2.43232536315918	-2.87053108215332	-8.60999202728271	-2.91582489013672	-4.48007965087891	-5.00622940063477	-2.78558540344238	-7.5890645980835	-4.19445037841797	-2.96084880828857	-3.22459983825684	-3.16399192810059	-6.41460657119751	-4.25297260284424	-2.06164932250977	-6.58266448974609	1.2895679473877	-3.7681999206543	-2.39758110046387	-10.0066232681274	-8.89247894287109	-3.07998466491699	-3.82208156585693	-3.72563171386719	-4.34453773498535	-4.47563362121582	-4.90267562866211	-3.63010120391846	-4.55503177642822	-0.956550598144531	-3.84836578369141	-2.71118354797363	-1.75960826873779	-4.0901403427124	-3.7311429977417	-2.40384674072266
1127	XP_019884712.1;XP_011264422.1		0.914752	0.3104	1.61863	0.535233	|XP_011264422.1 annexin B9-like isoform X1 [Camponotus floridanus]	0.683842658996582	0.0987930297851563	-1.98376274108887	1.55527496337891	-2.0334415435791	-0.0915641784667969	-1.67720603942871	-1.72988510131836	-9.97790241241455	-8.94534969329834	-1.26556777954102	-1.24458885192871	0.174617767333984	-1.03193092346191	-1.84829902648926	-3.89465618133545	-0.649736404418945	-2.23507690429688	-5.81343984603882	-0.394652366638184	1.18418312072754	-3.07585906982422	-3.14274406433105	-0.0430755615234375	-1.26053237915039	-5.54917144775391	-1.40288352966309	1.84561347961426	-0.97206974029541	-5.88984823226929	1.94871520996094	-7.99467849731445	-3.64740180969238	-9.83452224731445	-3.13173389434814	-3.55065536499023	-0.811264038085938	-4.82517433166504	0.442805290222168	-7.83213996887207	-9.28231716156006	0.787893295288086
1130	XP_011264740.1;E2AVJ5		0.391431	0.645	0.631536	0.229462	|XP_011264740.1 transferrin [Camponotus floridanus]	-2.31397151947021	-0.883686065673828	1.64080047607422	2.62165260314941	-0.43353271484375	-3.16720771789551	0.350231170654297	0.702486038208008	-1.60799503326416	0.374383926391602	1.3443431854248	2.74150657653809	-1.64131164550781	-1.84137153625488	2.95508193969727	-0.899598121643066	-0.690866470336914	-0.928739547729492	0.923833847045898	-1.14023494720459	-1.71453094482422	-0.395284652709961	-1.72045135498047	0.945283889770508	-1.84448623657227	-1.39703559875488	-3.48141288757324	-3.19859886169434	0.0926408767700195	-2.99217414855957	-4.03428077697754	-2.89784812927246	-1.27030944824219	-3.94532299041748	-2.72521305084229	-3.25937652587891	-1.84275817871094	-7.98096370697021	2.37452220916748	-0.372586250305176	-7.64471578598022	-2.63276672363281
1144	XP_011266004.2		0.628001	0.404825	-1.38076	-0.438777	|XP_011266004.2 venom serine carboxypeptidase-like [Camponotus floridanus]	0.0646276473999023	-1.27341651916504	-0.236316680908203	-3.6258430480957	1.57571220397949	-1.24876022338867	1.12545776367188	-2.69748497009277	5.57250881195068	4.35453033447266	2.88982582092285	-2.4645881652832	3.3971996307373	2.9887523651123	-7.25692844390869	3.76121425628662	2.60176467895508	4.08766174316406	1.53623580932617	3.48742771148682	-0.779150009155273	1.01261329650879	2.33575248718262	5.60453796386719	3.64512062072754	6.57679748535156	2.60406684875488	1.30759620666504	5.4164400100708	-7.77758407592773	-3.80336570739746	3.4499340057373	4.41787338256836	4.60776996612549	4.27787685394287	3.64009094238281	3.41128158569336	3.81306838989258	0.078608512878418	-8.62415504455566	2.82665920257568	0.743535995483398
1145	XP_011266010.1;E2AY02		0.458079	0.702017	-0.510923	-0.201271	tr|E2AY02|E2AY02_CAMFO Carboxypeptidase OS=Camponotus floridanus (Florida carpenter ant) OX=104421 GN=EAG_12710 PE=3 SV=1	6.33431720733643	6.43313789367676	7.49912261962891	3.08539962768555	6.17927932739258	8.17215728759766	7.61745643615723	4.93413734436035	8.11358737945557	7.67779731750488	6.77455902099609	3.65456008911133	5.35158538818359	8.12689208984375	3.21819686889648	7.57583522796631	8.58258819580078	6.84257698059082	7.78421783447266	7.18434810638428	6.65731620788574	8.09739685058594	7.86286354064941	7.23344230651855	9.39765167236328	8.96221923828125	8.2033805847168	4.4625129699707	8.6989107131958	9.29368591308594	4.76009941101074	9.17712020874023	7.69225692749023	9.26913928985596	7.82182216644287	8.37776756286621	6.46228790283203	7.4605770111084	4.04203319549561	8.57937717437744	8.25255298614502	5.8431282043457
1146	XP_011266069.1;E2AY28		1.72584	0.382847	-1.13189	-0.459622	tr|E2AY28|E2AY28_CAMFO Uncharacterized protein OS=Camponotus floridanus (Florida carpenter ant) OX=104421 GN=EAG_05928 PE=4 SV=1	8.23470592498779	9.05182456970215	10.1822166442871	9.89837646484375	9.76953125	11.9288902282715	10.8043270111084	12.5620231628418	10.9858846664429	10.9758358001709	8.48525619506836	5.6688404083252	8.34191513061523	11.6156463623047	10.1555595397949	10.5658292770386	12.2434825897217	9.96103096008301	10.4186153411865	9.69088649749756	9.2332878112793	11.4999732971191	9.60770988464355	10.0458297729492	12.2086887359619	10.782356262207	11.1635303497314	6.75748062133789	10.8845720291138	12.1102199554443	9.3602294921875	11.2084884643555	10.7568206787109	11.4403772354126	9.92589855194092	10.8659267425537	8.86879539489746	10.7422332763672	6.79724025726318	11.0960474014282	11.1587362289429	8.08710861206055
1148	XP_011266190.1;E2AYB4		0.222934	0.778803	0.473816	0.163789	tr|E2AYB4|E2AYB4_CAMFO Vitellogenin domain-containing protein OS=Camponotus floridanus (Florida carpenter ant) OX=104421 GN=EAG_04079 PE=4 SV=1	-7.00778579711914	-1.74182510375977	-2.47310256958008	0.287105560302734	-5.16122055053711	-6.4991717338562	-2.02926635742188	-1.85661125183105	-6.04411649703979	-0.990179061889648	-2.24001121520996	0.0794544219970703	-6.71801376342773	-3.93987846374512	-1.83853530883789	0.266310691833496	-1.788818359375	-3.39664649963379	-5.0067138671875	-7.0782995223999	-3.1921443939209	-2.45298385620117	-5.71539878845215	-1.65311241149902	-1.87052536010742	-11.247386932373	-2.48546409606934	-4.86482429504395	-5.55607128143311	-2.60657119750977	-8.16037464141846	-9.39727783203125	-2.57966995239258	-1.97494792938232	-2.96176624298096	-4.99783706665039	-3.28073883056641	-2.15633964538574	0.154192924499512	-1.45738124847412	-6.51998567581177	-7.7237606048584
1152	XP_011266630.1;E2AZ60		1.91518	0.2678	-1.47375	-0.575307	tr|E2AZ60|E2AZ60_CAMFO Peptidase A1 domain-containing protein OS=Camponotus floridanus (Florida carpenter ant) OX=104421 GN=EAG_08758 PE=3 SV=1	4.72074794769287	6.6919994354248	7.64037704467773	7.19521903991699	7.43206405639648	8.44198608398438	7.30986404418945	10.1342849731445	8.49810314178467	8.7546215057373	6.49143028259277	1.63104057312012	4.61901664733887	9.30851554870605	8.78684234619141	8.90273571014404	10.213041305542	7.03474617004395	7.27203941345215	6.60215473175049	6.95477485656738	8.63244247436523	7.77309799194336	7.05838012695313	9.36017608642578	7.31420135498047	8.09934043884277	2.85953330993652	7.56666088104248	9.23349380493164	6.11239624023438	8.15949249267578	8.08015632629395	9.13912296295166	7.09661960601807	7.96055030822754	5.51107025146484	7.73190689086914	2.81138324737549	9.47634601593018	8.05897426605225	5.63468170166016
1154	XP_011267011.2		0.303539	0.595709	-0.836162	-0.259641	|XP_011267011.2 venom acid phosphatase Acph-1 [Camponotus floridanus]	0.0100545883178711	-0.455587387084961	-0.738601684570313	0.114494323730469	3.71189880371094	4.3023681640625	4.21761512756348	-2.38768005371094	3.91758632659912	5.10498237609863	3.90632820129395	0.861688613891602	3.22414970397949	4.74242782592773	-1.59696388244629	4.02539157867432	6.22121429443359	2.77537727355957	4.57626724243164	1.53918361663818	2.21643257141113	6.48344421386719	1.58447456359863	4.71472358703613	6.94729042053223	4.60820007324219	-5.93730783462524	1.75163269042969	2.83965015411377	7.48436164855957	-1.24761581420898	5.46562767028809	5.7057991027832	3.21933460235596	2.92552661895752	6.55892181396484	-7.409339427948	3.9141788482666	0.234076499938965	-7.21565532684326	-2.34414196014404	-6.09216928482056
1155	XP_011267122.2;XP_011267116.2;XP_011267109.2;XP_011267102.2;XP_011267093.2;XP_011267131.3;E1ZYU8		0.407523	0.792752	-0.356378	-0.147795	|XP_011267102.2 glucosylceramidase isoform X2 [Cam	0.102267265319824	1.68842506408691	2.94338226318359	0.27752685546875	1.99216461181641	3.05685615539551	1.25119781494141	2.22175979614258	1.30820751190186	2.13340187072754	0.644454956054688	-1.70907020568848	0.71763801574707	1.96200561523438	1.28104209899902	2.72482395172119	4.12161636352539	1.64179801940918	1.20675277709961	1.82289600372314	2.64198684692383	1.78904914855957	1.74662399291992	1.10106086730957	3.40852355957031	0.463521957397461	3.34074401855469	-0.265527725219727	2.55525493621826	3.86450386047363	0.123062133789063	2.87976264953613	2.23556709289551	2.42843532562256	1.69133281707764	1.1497917175293	1.65814590454102	3.31336212158203	-0.763297080993652	3.69948863983154	0.673991203308105	0.690166473388672
1163	XP_011267533.1;XP_011267532.1;XP_011267531.1;E2B153		3.56656	0.198933	1.57607	0.657904	|XP_011267531.1 actin-5, muscle-specific [Camponotus floridanus]	2.29397869110107	3.35821342468262	3.89039039611816	3.76693344116211	3.35374450683594	5.94680786132813	3.74392509460449	1.98578453063965	1.09272289276123	2.74426460266113	3.83827209472656	0.289213180541992	2.20678329467773	1.55222129821777	3.34133720397949	2.82971477508545	2.75012969970703	1.12201118469238	3.75980186462402	1.66821575164795	2.74810028076172	1.1258716583252	2.49020195007324	2.26874732971191	3.267822265625	1.51114463806152	2.9094066619873	3.44263076782227	4.73638439178467	2.9333553314209	1.32406044006348	-1.896240234375	0	-0.199795722961426	0.83582592010498	1.65728759765625	2.9660530090332	1.54968643188477	3.72828006744385	2.09147930145264	2.505934715271	1.99403953552246
1174	XP_011268594.2		0.710402	0.421589	1.1735	0.406008	|XP_011268594.2 beta-galactosidase [Camponotus floridanus]	-0.957009315490723	-1.20005226135254	-2.1915454864502	-3.91225051879883	-5.04145240783691	0.233945846557617	-2.00761413574219	-1.42087173461914	-4.30967617034912	1.75675964355469	3.14336013793945	2.74298095703125	0.418336868286133	-9.55577850341797	-0.797149658203125	-0.405154228210449	-7.88511037826538	0.968435287475586	2.12502288818359	2.50082683563232	-2.01233863830566	-6.57024049758911	-1.3163013458252	1.38547897338867	1.25758934020996	2.95055198669434	0.968986511230469	1.95940780639648	1.93116664886475	-0.422588348388672	-0.0514183044433594	-0.746881484985352	1.23299598693848	-2.32887363433838	-0.000266075134277344	0.784208297729492	2.10848236083984	0.351240158081055	0.974610328674316	0.24376392364502	-1.77140712738037	-0.471645355224609
1181	XP_011269026.3;E2A0U6		0.754542	0.556086	-0.799283	-0.309747	tr|E2A0U6|E2A0U6_CAMFO N-acetylmuramoyl-L-alanine amidase OS=Camponotus floridanus (Florida carpenter ant) OX=104421 GN=EAG_11291 PE=4 SV=1	-3.89416980743408	-4.81494331359863	-3.85070037841797	-5.97516632080078	-5.64368772506714	-0.464712142944336	-7.88846302032471	-4.45949935913086	-4.25741863250732	-2.58900260925293	-2.63247680664063	-6.05296611785889	-7.3642749786377	-4.61522483825684	-4.81233215332031	-3.38488674163818	-2.83831119537354	-5.10206985473633	-7.3242359161377	-4.28649806976318	-6.3577880859375	-7.75441026687622	-2.65469741821289	-6.94673013687134	-3.2642993927002	-3.25119972229004	-2.61127853393555	-3.27701187133789	-3.73106670379639	-3.88484764099121	-4.65374374389648	-5.75417900085449	-6.98989009857178	-2.76725482940674	-2.07810497283936	-2.83925247192383	-7.78452110290527	-5.30328178405762	-1.17510318756104	-4.90308856964111	-6.53191471099854	-4.27008819580078
1190	XP_011269819.1;E2A2D1		1.49107	0.171586	1.97164	0.68232	tr|E2A2D1|E2A2D1_CAMFO Ras-related protein Rab-1A OS=Camponotus floridanus (Florida carpenter ant) OX=104421 GN=EAG_12529 PE=4 SV=1	-2.59583759307861	-0.76298713684082	-0.827880859375	-0.357631683349609	-3.36549758911133	-7.18042182922363	-6.15827941894531	-7.03141784667969	-6.62368297576904	-2.68480110168457	-1.90922927856445	-4.19119644165039	-0.743007659912109	-3.06561088562012	-0.854148864746094	-1.22979831695557	-9.32310771942139	-3.55721282958984	-5.5003547668457	-1.85182857513428	-1.54669952392578	-7.36353445053101	0.331005096435547	-0.980329513549805	-2.27298164367676	-10.4419593811035	-2.42897796630859	-2.45956039428711	-0.908835411071777	-8.05450630187988	-2.86301612854004	-8.70462417602539	-5.27219295501709	-7.74197244644165	-3.22252941131592	-2.55710601806641	-3.22715187072754	-7.4934458732605	-1.24573612213135	-7.7331109046936	-0.906954765319824	-1.78422164916992
1193	XP_019882311.2;E2A631		1.18596	0.43619	-0.934047	-0.37468	tr|E2A631|E2A631_CAMFO Ribonuclease Oy OS=Camponotus floridanus (Florida carpenter ant) OX=104421 GN=EAG_06245 PE=3 SV=1	4.40988445281982	5.02445411682129	6.73192596435547	5.36112594604492	5.28753280639648	8.56342697143555	6.12314224243164	7.53240013122559	6.51498699188232	6.58579635620117	4.41992378234863	1.18582725524902	3.93155670166016	6.98768615722656	6.76006698608398	6.16466999053955	7.93513298034668	5.23753356933594	6.60289573669434	5.78538799285889	5.78463745117188	6.68901634216309	5.67084884643555	5.54947471618652	7.93054389953613	5.96680641174316	7.87407875061035	2.27983474731445	7.20962810516357	8.03674697875977	5.4003849029541	6.93918037414551	6.48565864562988	7.06765270233154	6.16186428070068	5.69038200378418	4.74571418762207	6.86962127685547	1.82044124603271	7.36056423187256	6.78232288360596	4.59536361694336
1194	XP_019882348.2;E2A6E1		0.801999	0.317551	1.61614	0.517471	tr|E2A6E1|E2A6E1_CAMFO Protein G12 OS=Camponotus floridanus (Florida carpenter ant) OX=104421 GN=EAG_09916 PE=4 SV=1	-0.348361015319824	-6.07245635986328	0.432319641113281	-5.76447296142578	-0.207691192626953	-8.33856105804443	-4.03086853027344	-7.86735963821411	-8.27713871002197	-1.6590518951416	-6.98882246017456	-0.332557678222656	0.288063049316406	-1.261474609375	-6.93356847763062	-2.88964748382568	-6.51498746871948	0.621295928955078	-3.27584075927734	-7.74188137054443	-0.72557258605957	-2.0992431640625	-5.23838233947754	-2.00257301330566	-3.01746940612793	-6.37460136413574	-2.01596260070801	5.27448463439941	-0.334771156311035	-6.30846548080444	1.81715202331543	-7.59900140762329	-5.76528739929199	-2.0214319229126	-3.870924949646	-3.29839706420898	3.35732078552246	-3.40701103210449	1.48480892181396	-3.28040218353271	-10.441385269165	-1.86506652832031
1195	XP_025262946.1;XP_019882428.1;XP_019882427.1;XP_019882425.1;XP_019882423.1;XP_019882399.1;XP_019882376.1;XP_025262953.1;XP_025262951.1;XP_025262949.1;XP_025262945.1;XP_025262944.1;XP_025262943.1;XP_019882419.1;XP_019882418.1;XP_019882409.1;XP_019882401.1;XP_019882400.1;XP_019882398.1;XP_019882396.1;XP_019882393.1;XP_019882391.1;XP_019882383.1;XP_019882380.1;XP_019882377.1;XP_019882375.1;XP_025262…		1.02383	0.400554	1.16755	0.43526	|XP_019882425.1 myosin	0.375481605529785	1.28927803039551	0.912458419799805	2.06137275695801	-0.583076477050781	0	1.09169006347656	-5.38537120819092	-1.41689395904541	-2.38564491271973	-0.618825912475586	-4.96245574951172	1.77405166625977	-0.466440200805664	-4.42317962646484	1.75086498260498	-0.0644016265869141	-0.241472244262695	2.91375732421875	-1.00880527496338	1.42088508605957	-1.73053359985352	-0.367345809936523	0.941604614257813	1.62267875671387	-4.36729621887207	0.630495071411133	0.521265029907227	1.2875509262085	0.0526256561279297	-1.47478294372559	-4.80947685241699	0.425497055053711	2.79148960113525	1.12495899200439	1.3537540435791	0.400091171264648	2.05581092834473	-3.20157527923584	-2.48435306549072	0.680319786071777	0.612545013427734
1198	XP_019882595.1;E2A8M9		0.000661198	1	0.00223407	0.00070596	tr|E2A8M9|E2A8M9_CAMFO Odorant receptor OS=Camponotus floridanus (Florida carpenter ant) OX=104421 GN=EAG_14019 PE=3 SV=1	-0.0954122543334961	1.87521743774414	6.15353012084961	0.979959487915039	-0.0378570556640625	-7.35449838638306	2.53637504577637	-6.58441495895386	0.692597389221191	4.11874198913574	4.99262809753418	2.78548431396484	2.07701110839844	-0.63117790222168	4.99150276184082	2.04629230499268	1.93220329284668	3.2852783203125	-0.821432113647461	4.74330425262451	0.600351333618164	-0.890338897705078	3.58785629272461	2.62458229064941	4.14467620849609	4.93603515625	4.34104919433594	-0.00537681579589844	3.87703609466553	3.15044212341309	-0.540737152099609	-1.27436065673828	0.106529235839844	-0.344542503356934	0.785819053649902	0	2.24592590332031	1.57948112487793	0.630846977233887	-9.21398830413818	-10.3755502700806	0.439105987548828
1200	XP_025266198.1;XP_025266197.1;XP_025266196.1;XP_025266195.1;XP_019882760.2		0.129263	0.888106	-0.215551	-0.0812836	|XP_025266195.	-7.1194372177124	-4.57942581176758	-0.337825775146484	-4.50749206542969	-6.31624031066895	-4.06473350524902	-7.37221479415894	-1.66073799133301	-8.67861461639404	-3.93197441101074	-5.84447479248047	-5.72744941711426	-6.17684364318848	-4.1580867767334	-4.1516284942627	-3.65691661834717	-7.97321367263794	-5.37696838378906	-9.1897497177124	-5.51722621917725	-3.87968254089355	-7.98160457611084	-3.88902282714844	-7.37188768386841	-2.09133911132813	-4.0357666015625	-2.88960838317871	-5.45609092712402	-4.7893648147583	-4.09438705444336	-9.1964225769043	-5.10968780517578	-4.75406455993652	-2.6448392868042	-5.89196681976318	-3.55218124389648	-6.95688438415527	-4.32537460327148	-7.04246234893799	-2.13719081878662	-3.92018413543701	-5.25066566467285
1208	XP_019883740.2;E2AKK9		0.400935	0.565113	0.913377	0.297744	tr|E2AKK9|E2AKK9_CAMFO Amidohydro-rel domain-containing protein OS=Camponotus floridanus (Florida carpenter ant) OX=104421 GN=EAG_14558 PE=4 SV=1	-0.0100545883178711	0.739944458007813	-4.43542861938477	0.425527572631836	-0.0281047821044922	-6.90363168716431	1.26270484924316	-8.43664264678955	0.303309440612793	-5.91995668411255	-0.81684684753418	-2.82369804382324	0.585485458374023	-5.99081659317017	-6.55694580078125	1.32746982574463	-0.295886993408203	-1.12361717224121	-1.6245059967041	-1.65526866912842	1.39277458190918	0.333257675170898	-1.53968811035156	-0.549890518188477	-2.37423133850098	0.127597808837891	-2.86474609375	1.34167098999023	-0.737915992736816	2.81596374511719	0.0786380767822266	2.63558578491211	-8.985107421875	2.6608190536499	-1.6808443069458	-9.34513854980469	-1.84309005737305	-4.47989845275879	-4.90649890899658	-6.42159175872803	-6.79945278167725	1.47757911682129
1209	XP_019884420.2		0.634133	0.564	-0.797141	-0.299976	|XP_019884420.2 alpha-amylase [Camponotus floridanus]	-0.0400362014770508	-0.598526000976563	-0.89593505859375	-2.47784805297852	-1.57109642028809	3.02535438537598	0.838884353637695	-0.865690231323242	1.04681301116943	4.14211273193359	2.84682464599609	1.30073356628418	0.654478073120117	2.16522598266602	0.609655380249023	4.73727893829346	2.61219787597656	1.89707946777344	-2.13810539245605	3.10758495330811	-0.225498199462891	5.84433746337891	1.75378608703613	1.14975166320801	3.59551429748535	2.16508483886719	4.9013614654541	1.15779876708984	4.77999401092529	4.58198165893555	0.825637817382813	2.98215484619141	3.02520942687988	3.04191303253174	3.06500339508057	3.23128509521484	1.45310592651367	1.46231651306152	-1.33465671539307	5.23375034332275	2.04466724395752	0.496206283569336
1210	XP_019884788.1;XP_019884801.1;XP_019884800.1;XP_019884798.1;XP_011265227.1;XP_019884796.1;XP_019884794.1;XP_019884790.1;XP_019884789.1;XP_019884786.1;XP_019884785.1;XP_025267686.1;XP_019884802.1;XP_025267684.1;XP_019884792.1;XP_019884791.1;XP_019884787.1;XP_019884803.1;XP_025267682.1;XP_019884793.1;XP_025267685.1		0.765908	0.466207	0.958461	0.356497	|XP_019884800.1 ba	-4.74116802215576	-4.28337669372559	-6.95354890823364	-5.46392059326172	-7.58689594268799	-4.72127485275269	-9.23432064056396	-7.23210191726685	-2.26674175262451	-5.65224742889404	-5.33860969543457	-3.23918342590332	-2.3005256652832	-4.85623931884766	-3.46293830871582	-8.52049732208252	-7.66463422775269	-4.48201179504395	-6.76068305969238	-4.407790184021	-4.77840042114258	-5.16506576538086	-4.75361442565918	-4.30220603942871	-7.1130199432373	-6.25392150878906	-8.96656036376953	-2.04931449890137	-4.50727939605713	-7.05786800384521	-2.05856323242188	-9.1158447265625	-6.26950025558472	-11.191743850708	-8.0757532119751	-6.48908424377441	-3.78660774230957	-4.91531753540039	-5.63796901702881	-9.70851516723633	-7.37119770050049	-4.42836761474609
1216	XP_019885340.1;E1ZZ64;E1ZZ62		0.115411	0.887816	-0.216267	-0.0793963	|XP_019885340.1 uncharacterized protein LOC109610529 [Camponotus floridanus]	-1.9442663192749	0.591327667236328	2.78119850158691	5.27871894836426	2.43568801879883	6.90280532836914	2.37949371337891	5.50706481933594	2.34282398223877	2.2987117767334	0.550235748291016	-3.48677635192871	-1.47687721252441	0.883047103881836	4.03605079650879	2.22691249847412	4.43685150146484	0.6737060546875	3.46956253051758	0.0879907608032227	1.88397026062012	4.73387718200684	2.09007835388184	1.61571311950684	2.17511367797852	0.649055480957031	2.68310165405273	-1.74942779541016	0.510560035705566	-0.551136016845703	0.62938117980957	-1.48599052429199	1.30149459838867	-0.910063743591309	-0.719592094421387	-1.10891342163086	0.882247924804688	1.30790519714355	-2.08804416656494	0.892718315124512	0.331999778747559	-0.964818954467773
1220	XP_025262039.1;XP_025262034.1;XP_025262032.1;XP_025262029.1;E2A1S2;E2AVK5		0.177765	0.854825	0.288207	0.108394	|XP_0	-6.37486505508423	-1.71228790283203	-0.725923538208008	0.137176513671875	-1.89765930175781	-4.61389255523682	-1.572265625	-0.321212768554688	-0.456545829772949	0.325666427612305	-0.558515548706055	2.58329391479492	-3.50947380065918	-1.42241287231445	-0.0497703552246094	-1.20264720916748	-0.480195999145508	-2.64875411987305	-0.435359954833984	-1.91188526153564	-0.863107681274414	-2.01652526855469	-4.35534477233887	-1.72875785827637	-1.5506649017334	-9.72858142852783	-2.33941841125488	-1.07578086853027	0.230443000793457	-1.88212394714355	-1.07776260375977	-0.540058135986328	-1.95552062988281	0.128472328186035	-2.01400279998779	-2.67486953735352	-2.89313125610352	2.22360038757324	-1.04148769378662	-0.640233039855957	-2.17836856842041	-2.66082572937012
1222	XP_025262246.1		0.0704395	0.952373	-0.100632	-0.0397794	|XP_025262246.1 uncharacterized protein LOC105256493 [Camponotus floridanus]	5.57259464263916	3.7806453704834	6.10458946228027	4.96073341369629	4.63032341003418	8.05114936828613	5.08765983581543	6.84136199951172	1.60841846466064	6.06052589416504	5.33127212524414	1.58819389343262	3.59099769592285	8.33146476745605	4.2735652923584	4.48706150054932	5.2230396270752	4.0104923248291	5.68065452575684	4.84552097320557	5.64124870300293	4.62609672546387	6.13214492797852	4.88076400756836	4.92254066467285	4.16782188415527	6.33624267578125	0.440423965454102	6.41323947906494	5.19445610046387	3.35352325439453	4.75211524963379	4.11096572875977	5.17357158660889	5.83304309844971	3.50055313110352	4.12692642211914	4.72749519348145	1.15977954864502	5.33605861663818	5.61685276031494	1.83311462402344
1224	XP_025262495.1		0.286548	0.63033	0.741939	0.236665	|XP_025262495.1 pheromone-binding protein Gp-9-like [Camponotus floridanus]	-1.09361934661865	-1.69694519042969	1.45368766784668	3.7988224029541	1.85626411437988	0.256240844726563	2.43463897705078	2.75669097900391	1.17866039276123	0.819192886352539	-0.384220123291016	-1.64383125305176	-2.9632396697998	-9.19303035736084	2.70863723754883	0.133419990539551	2.20261192321777	0	2.45283126831055	-0.953221321105957	0.281280517578125	-0.335357666015625	-1.7117977142334	2.18190765380859	-6.1438102722168	-1.20832061767578	-6.46383619308472	-5.74404907226563	-2.28373050689697	-9.63962650299072	-3.52577972412109	-5.61621046066284	-1.07326507568359	-5.51856470108032	-2.35052967071533	-7.86261606216431	-2.06220245361328	-2.27852630615234	-0.0418272018432617	-7.9282546043396	-7.7288384437561	-2.34200859069824
1235	XP_025262735.1;XP_025262733.1		2.19388	0.1505	1.94933	0.727821	|XP_025262733.1 arginine kinase isoform X2 [Camponotus floridanus]	1.59347629547119	1.4116153717041	-0.0943946838378906	1.55389404296875	2.05338478088379	0.822574615478516	1.77969932556152	-1.65837097167969	-0.0670442581176758	-4.27506065368652	-0.812381744384766	-0.773439407348633	1.12241744995117	-1.88272476196289	-0.149501800537109	1.16692447662354	0.00520515441894531	-0.154268264770508	0.4068603515625	-0.735407829284668	1.14035415649414	-1.57448196411133	2.8253288269043	1.69351959228516	1.28487396240234	-8.52177238464355	-0.61918830871582	0.49781608581543	-0.57746410369873	-1.21907043457031	0.33624267578125	-8.54363632202148	-2.94229125976563	0.0491819381713867	0.729397773742676	-0.620492935180664	0.214817047119141	0.455846786499023	1.74583911895752	-0.205264091491699	-0.489045143127441	0.662734985351563
1236	XP_025262760.1;E2ATD2		1.44441	0.402909	-1.07969	-0.432256	|XP_025262760.1 uncharacterized protein LOC105255829 [Camponotus floridanus]	6.30711841583252	6.24575805664063	7.52128601074219	6.03555297851563	7.23457145690918	8.88409423828125	7.34187889099121	8.64575386047363	8.82974910736084	8.60021591186523	6.5810375213623	3.48129081726074	5.15423583984375	8.87242889404297	7.45158386230469	8.47784519195557	9.66543197631836	7.3093090057373	7.31496047973633	6.49485683441162	7.70050239562988	8.27908706665039	7.46153831481934	6.24994468688965	7.8082447052002	7.00675010681152	7.93166923522949	2.81642913818359	6.85119724273682	7.33303642272949	4.44074440002441	7.7781810760498	6.52315139770508	7.72837543487549	6.54350757598877	6.12580299377441	5.08949661254883	6.54125022888184	2.23961544036865	8.09874057769775	6.68503284454346	4.0368537902832
1246	XP_025263096.1;XP_025263073.1;XP_025263075.1;E2B003		1.2578	0.369895	-1.233	-0.469739	tr|E2B003|E2B003_CAMFO Aamy domain-containing protein OS=Camponotus flor	5.72998332977295	8.00810241699219	8.5777473449707	5.75140953063965	9.03774452209473	8.54970169067383	9.67893218994141	5.46728324890137	10.0674352645874	11.3064708709717	9.07705497741699	5.37768745422363	6.98040771484375	10.2091484069824	7.94218444824219	10.3359327316284	11.3137054443359	10.0362911224365	8.80926513671875	9.67464351654053	8.25616645812988	10.7403450012207	9.77439308166504	8.94953918457031	12.5889949798584	11.6231079101563	11.8269290924072	6.86302185058594	9.59573841094971	12.2044200897217	7.92646408081055	11.6836471557617	11.6741828918457	12.3157968521118	9.3842077255249	11.5331134796143	7.67617225646973	10.0199775695801	6.0779333114624	12.2635011672974	10.7449522018433	8.67587280273438
1247	XP_025263076.1		0.0870313	0.930727	-0.166125	-0.0610995	|XP_025263076.1 maltase 1-like [Camponotus floridanus]	5.88216686248779	6.17356109619141	5.48735046386719	0.440658569335938	5.8713436126709	4.84649658203125	8.05171203613281	2.15599060058594	8.41939449310303	8.42513084411621	6.70223236083984	2.41138076782227	5.08490180969238	7.10979843139648	1.55134201049805	7.6840181350708	7.34745216369629	7.46427536010742	6.8395824432373	7.59512996673584	6.32066535949707	6.46551704406738	6.68037986755371	6.05984497070313	8.47678375244141	8.88655281066895	4.64491271972656	2.48248291015625	7.70765781402588	8.09517669677734	1.27228736877441	8.65340995788574	6.73482704162598	8.70324420928955	5.43157482147217	5.92345237731934	5.24825477600098	7.12186241149902	2.86516666412354	4.79337024688721	8.29123210906982	4.60786437988281
1248	XP_025263077.1		0.561323	0.581296	-0.708713	-0.268453	|XP_025263077.1 maltase 1-like [Camponotus floridanus]	3.64979648590088	5.59371185302734	5.33270072937012	2.35183906555176	5.46716117858887	4.79592132568359	6.75848770141602	1.50906181335449	6.13046169281006	7.64926910400391	6.12795448303223	1.83509063720703	4.52732276916504	6.87172317504883	3.53378295898438	7.08091640472412	7.69013786315918	6.60323333740234	6.05421257019043	7.20601749420166	5.16409683227539	7.02835273742676	6.35453987121582	6.30089378356934	9.52280235290527	7.73003578186035	8.14425468444824	3.58784103393555	7.01347637176514	8.9844970703125	3.6170711517334	8.9290657043457	7.99728202819824	9.04948902130127	6.15598011016846	8.16727256774902	4.9867057800293	7.06660842895508	2.93176555633545	7.88065052032471	7.66551113128662	5.33551406860352
1253	XP_025263365.1		0.268094	0.606536	0.846946	0.251436	|XP_025263365.1 alpha-amylase A-like [Camponotus floridanus]	-5.37232494354248	-5.54870080947876	-4.83324289321899	-1.53325843811035	-7.97290277481079	-6.86318111419678	-2.60400390625	-1.87808418273926	-4.68459796905518	4.15385437011719	1.73521995544434	0.389194488525391	-7.08130359649658	-7.07891845703125	-2.45347785949707	-8.54722023010254	-2.35531425476074	-0.230428695678711	-2.96888542175293	1.98014163970947	-2.80807876586914	-1.0247974395752	-3.50184631347656	0.792619705200195	5.24702453613281	-7.32109355926514	0.457107543945313	0.623407363891602	3.75563716888428	2.70404624938965	-0.503366470336914	-9.8144006729126	3.3958797454834	5.45081615447998	3.82318592071533	3.3538818359375	0.303979873657227	3.73601722717285	-0.0807561874389648	6.56922435760498	-1.14720058441162	-6.11718273162842
1264	XP_025264147.1		0.554566	0.597477	-0.670975	-0.256936	|XP_025264147.1 uncharacterized protein LOC105250349 [Camponotus floridanus]	-8.32686519622803	-6.12196350097656	-6.58871936798096	-4.12055778503418	-7.3664608001709	-2.62578964233398	-8.51150989532471	-3.6927604675293	-9.85206413269043	-4.79741096496582	-5.8069953918457	-4.13222694396973	-5.50971031188965	-4.40955924987793	-1.81618499755859	-5.97490406036377	-3.18038940429688	-4.94679069519043	-8.56004905700684	-9.16062545776367	-6.58881759643555	-7.11373901367188	-5.61017227172852	-5.29638290405273	-7.31019878387451	-7.58240699768066	-1.91560935974121	-7.28271102905273	-6.62428951263428	-5.38225364685059	-6.20278739929199	-5.62395477294922	-7.93969535827637	-5.63306140899658	-8.94424533843994	-7.73042869567871	-8.49622344970703	-6.61471128463745	-5.17349147796631	-4.53343105316162	-7.29314804077148	-5.74629402160645
1273	XP_025264610.1		2.37838	0.138353	-2.11287	-0.783545	|XP_025264610.1 lysosomal aspartic protease isoform X1 [Camponotus floridanus]	4.3821439743042	5.7528076171875	5.89837646484375	1.77531814575195	3.0916576385498	7.85940361022949	7.28380966186523	10.2453365325928	8.70645236968994	7.34725761413574	5.61891746520996	1.67697525024414	3.62501907348633	8.78209686279297	7.83501815795898	8.04405689239502	9.6771240234375	7.25693702697754	5.2619571685791	7.34548664093018	5.32358360290527	3.85195541381836	7.54123115539551	6.27289390563965	8.46758651733398	7.67799186706543	4.1989631652832	0.445701599121094	7.05954265594482	9.37173461914063	4.81165885925293	9.6179141998291	7.12636375427246	10.169997215271	7.25486278533936	7.40548896789551	5.99770927429199	8.07463645935059	2.80941486358643	6.65114307403564	8.92660045623779	5.9073657989502
1274	XP_025264611.1		0.484815	0.576731	-0.773383	-0.278158	|XP_025264611.1 lysosomal aspartic protease isoform X2 [Camponotus floridanus]	7.06950855255127	7.4045295715332	4.92807197570801	7.00827407836914	7.63116455078125	10.0021057128906	9.27907180786133	10.9054889678955	10.199875831604	9.37281227111816	7.45515060424805	4.49699211120605	7.10655975341797	10.7600021362305	1.36741065979004	9.2686071395874	9.59685516357422	9.11304473876953	4.46831130981445	8.42995357513428	6.98535537719727	7.72219467163086	8.4277458190918	7.9707145690918	8.6878547668457	9.57144546508789	5.62674331665039	0.454729080200195	8.79497814178467	9.51937484741211	7.95601844787598	10.4732246398926	8.39291572570801	2.14469623565674	8.19443225860596	8.68896293640137	7.29958343505859	8.83744812011719	4.49548053741455	5.93532466888428	10.2882528305054	6.57882690429688
1275	XP_025264613.1		1.17896	0.429257	-1.04856	-0.410297	|XP_025264613.1 lysosomal aspartic protease isoform X3 [Camponotus floridanus]	2.71143627166748	3.85684394836426	4.01049613952637	5.11868667602539	3.92210578918457	8.03178215026855	5.55261421203613	6.76491928100586	5.6068639755249	4.76844787597656	3.24796295166016	0.492759704589844	4.92507934570313	6.8414421081543	4.79730033874512	5.30091381072998	7.10508155822754	4.83371543884277	3.98871803283691	4.31402111053467	3.9858455657959	7.37599563598633	5.10971260070801	5.91121482849121	7.08334159851074	6.53817367553711	4.33951759338379	0.796340942382813	5.52688694000244	6.45523834228516	5.21866607666016	6.80554008483887	3.78332901000977	6.62986087799072	3.71610736846924	5.09708213806152	2.80751037597656	4.11249732971191	0.112460136413574	6.32737636566162	6.23944568634033	3.38772773742676
1276	XP_025264718.1		0.11151	0.881469	0.266595	0.0912859	|XP_025264718.1 mediator of RNA polymerase II transcription subunit 12 [Camponotus floridanus]	-0.434985160827637	-0.645517349243164	0.144927978515625	3.20182609558105	-5.2712287902832	4.53020858764648	1.43364143371582	3.06302833557129	2.66045093536377	3.76851272583008	6.21294593811035	7.70026397705078	2.39902305603027	4.30385398864746	4.9869270324707	0.0541677474975586	4.09347343444824	-0.289764404296875	0.285137176513672	0.282118797302246	-0.0220069885253906	4.43265342712402	-0.650476455688477	1.41515159606934	0	-2.13264465332031	0.918523788452148	-0.745569229125977	5.68326473236084	-1.25374984741211	-0.85090446472168	-2.32125854492188	-0.00444984436035156	0.121657371520996	3.69595813751221	-2.99786949157715	2.54958534240723	-0.895772933959961	3.67733860015869	-0.785006523132324	-2.96296405792236	4.33895874023438
1278	XP_025265121.1;E1ZWT6		1.57162	0.126462	2.58487	0.827037	|XP_025265121.1 serine protease 52 [Camponotus floridanus]	2.71604442596436	-1.92927932739258	-2.44277572631836	-3.40887451171875	1.23780250549316	-4.93354368209839	-1.80981826782227	-8.6811580657959	-3.81095409393311	-1.86288261413574	-8.39126300811768	0.0113983154296875	2.87966918945313	-8.24053573608398	-8.83195400238037	-2.74087429046631	-1.70037269592285	0.674331665039063	-3.25936317443848	1.25535106658936	-0.966291427612305	-1.3264331817627	-3.59031867980957	-3.11512565612793	-1.65176010131836	-7.35106086730957	-1.61971282958984	4.56731605529785	-3.50204181671143	-10.4454898834229	1.90228271484375	-2.1774730682373	-3.32123565673828	-7.60400915145874	-2.64584064483643	0.222393035888672	3.70141983032227	1.34166717529297	3.98327159881592	0.394133567810059	-2.92000675201416	1.51329040527344
1280	XP_025265137.1;E2ABS8		0.301331	0.741246	0.513808	0.18654	tr|E2ABS8|E2ABS8_CAMFO Alpha-mann_mid domain-containing protein OS=Camponotus floridanus (Florida carpenter ant) OX=104421 GN=EAG_15547 PE=4 SV=1	-0.649031639099121	-3.33976364135742	-1.48067665100098	-3.80015182495117	-1.85957527160645	3.20895195007324	-3.7104549407959	-0.839838027954102	-8.44783115386963	-1.3425407409668	0.295770645141602	0.903999328613281	-0.682149887084961	-2.69601440429688	-2.51797294616699	-2.25753688812256	-0.159027099609375	-3.09757423400879	-4.78265190124512	-0.913208961486816	-3.25494003295898	-6.60900020599365	-4.79267883300781	-3.10623741149902	0.0361080169677734	-1.69548416137695	-1.01470756530762	2.60466575622559	-2.9379358291626	-0.937614440917969	-0.451351165771484	-3.19012451171875	0.473611831665039	-1.77493000030518	-1.08965969085693	-0.997642517089844	1.36999702453613	-1.03553199768066	3.77814197540283	-0.949755668640137	-3.65621662139893	-0.391672134399414
1282	XP_025265223.1;XP_025265222.1;XP_025265221.1		0.751681	0.405506	1.14219	0.403352	|XP_025265221.1 myosin-IB isoform X1 [Camponotus floridanus]	-6.8947114944458	-0.733623504638672	-1.83831405639648	-5.66938591003418	-1.71915245056152	-5.33847141265869	-1.89382553100586	-8.36987113952637	-7.05765008926392	-7.08061027526855	-4.44912338256836	-6.76743698120117	-3.05457305908203	-8.17834186553955	-9.12744808197021	-2.65037631988525	-4.01117324829102	-3.81999778747559	-9.90351676940918	-3.95724010467529	-2.78709602355957	-6.11583805084229	1.27264213562012	-3.83611488342285	-1.25811004638672	-5.60347747802734	-0.295116424560547	-1.70919990539551	-4.242751121521	-1.48991584777832	-4.06637382507324	-3.2860279083252	-4.55648231506348	-2.43752765655518	-2.52063083648682	-2.13833236694336	-2.84691047668457	-2.50263023376465	2.23506450653076	-2.94329738616943	-4.617112159729	-2.51235961914063
1291	XP_025265943.1;E2AGD3		0.516601	0.424222	1.33834	0.407199	tr|E2AGD3|E2AGD3_CAMFO Alpha-carbonic anhydrase domain-containing protein OS=Camponotus floridanus (Florida carpenter ant) OX=104421 GN=EAG_02852 PE=3 SV=1	2.87397480010986	-0.156719207763672	-0.217002868652344	0.847274780273438	2.53362274169922	-9.21594905853271	-0.196414947509766	-0.323554992675781	0.0711202621459961	-2.74779319763184	-0.94175910949707	-1.20849227905273	3.78152847290039	-9.96623134613037	-9.81906795501709	-8.98689651489258	0.100719451904297	-0.687473297119141	1.22740364074707	2.33819484710693	3.0866813659668	-9.17586135864258	-5.37242698669434	4.13825798034668	-1.48468780517578	-0.716953277587891	-0.0668220520019531	3.03439140319824	-2.08260059356689	-2.55079650878906	0	-1.8013801574707	-0.237287521362305	-7.51572704315186	1.97139835357666	1.51375961303711	3.35223579406738	-3.9499568939209	-6.86890316009521	-7.33608627319336	-4.05799388885498	1.21322441101074
1292	XP_025266319.1;E1ZXZ5;E2AC93		0.245704	0.793649	0.41068	0.151358	tr|E1ZXZ5|E1ZXZ5_CAMFO Arylphorin subunit alpha OS=Camponotus floridanus (Florida carpenter ant) OX=104421 GN=EAG_11874 PE=4 SV=1	0.97067928314209	1.79602432250977	3.99503326416016	1.90679168701172	3.84175872802734	6.4403018951416	3.54299736022949	4.69297409057617	3.71539783477783	5.81772232055664	6.25433540344238	6.70755767822266	1.28956413269043	4.57230377197266	7.38823699951172	2.499098777771	5.79742813110352	2.36542510986328	3.49878120422363	2.58373165130615	2.5982666015625	3.33590316772461	2.02702713012695	2.13266754150391	1.45224952697754	5.26263427734375	0.978891372680664	5.24463844299316	5.96162509918213	1.60931777954102	2.06088447570801	0.129024505615234	0.0480899810791016	-1.31227588653564	1.31239032745361	-0.0698223114013672	3.77688980102539	-0.273956298828125	4.83430194854736	1.00990390777588	-0.615914344787598	0.489763259887695
1300	XP_025267265.1;E1ZYQ6;E1ZYQ5		2.26735	0.122	2.91672	0.974576	tr|E1ZYQ6|E1ZYQ6_CAMFO Peptidase S1 domain-containing protein OS=Camponotus floridanus (Florida carpenter ant) OX=104421 GN=EAG_08393 PE=3 SV=1	0.209048271179199	-1.72740936279297	-1.79836082458496	-2.84819030761719	0.0887126922607422	-8.26225566864014	-3.65315437316895	-8.82175731658936	-2.55286884307861	-2.11222648620605	-5.00308799743652	-5.37537002563477	0.261337280273438	-7.82010555267334	-8.42731285095215	-4.16965579986572	-10.8757095336914	0.581666946411133	-3.99858474731445	-0.26115894317627	-0.265256881713867	-1.2623348236084	-0.382659912109375	-2.26203536987305	-4.0057430267334	-2.47599220275879	-2.38615226745605	1.1881160736084	-2.84437084197998	-6.9843168258667	0.980270385742188	-7.47322940826416	-9.69793701171875	-9.88396739959717	-1.79598522186279	-1.92206192016602	1.21110153198242	-2.15422630310059	-0.112854957580566	-0.870438575744629	-6.27278661727905	0.142515182495117
1303	XP_025267301.1;E2B0F9;XP_025264883.1;XP_025264884.1;E1ZYR2		0.0861223	0.915111	0.195251	0.0684329	tr|E2B0F9|E2B0F9_CAMFO Lactase-phlorizin hydrolase OS=Camponotus floridanus (Florida carpenter ant) OX=104421 GN=EAG_08018 PE=3 SV=1;|XP_02526	-4.05222606658936	-3.42874336242676	-3.36461639404297	-5.74514579772949	-1.85454559326172	-1.23117065429688	1.10376739501953	-2.03052711486816	-0.37299633026123	1.12117576599121	1.96175384521484	1.44941329956055	-0.681922912597656	-2.21341323852539	-4.22583389282227	1.0454568862915	-1.32419013977051	1.0383129119873	-9.82561206817627	-1.14978122711182	-0.214223861694336	0.444957733154297	-0.884134292602539	-1.56813621520996	4.65024948120117	3.17698669433594	-0.645885467529297	-2.5901985168457	-0.653923988342285	-0.9827880859375	-4.0080623626709	-3.16457939147949	-0.624792098999023	-4.05174350738525	-2.88064670562744	-0.675323486328125	-1.14181137084961	1.3182430267334	-1.46324443817139	3.54013347625732	-5.05963230133057	-2.61776924133301
1316	XP_025268350.1;E2AGJ5;E2AGJ4;REV__XP_019883532.1;REV__E2AI05		2.36939	0.136	2.5593	0.899303	tr|E2AGJ5|E2AGJ5_CAMFO Uncharacterized protein OS=Camponotus floridanus (Florida carpenter ant) OX=104421 GN=EAG_01782 PE=4 SV=1	-0.471316337585449	-2.75037002563477	-3.38947868347168	-4.65710830688477	-4.59164619445801	-2.43981552124023	-4.98371315002441	-5.98541641235352	-9.26424026489258	-2.71744728088379	-1.18939018249512	-2.07966423034668	-0.24365234375	-9.52663993835449	1.43362808227539	-3.41085338592529	-6.40111446380615	-6.11598587036133	-8.95005416870117	-1.11918163299561	-3.54442405700684	-7.33298635482788	-3.6564769744873	-4.66275596618652	-3.66851043701172	-10.0016775131226	-7.93385553359985	-3.68969917297363	-5.12839221954346	-2.93905639648438	-3.00834655761719	-7.72801494598389	-7.94159889221191	-6.19942092895508	-2.90046215057373	-8.09597015380859	-9.67648410797119	-2.74841117858887	-2.23927402496338	-2.67382526397705	-6.85297584533691	-3.67499351501465
1323	XP_025269114.1;XP_025269111.1;XP_025269110.1;XP_025269109.1;XP_025269112.1;XP_025269117.1;XP_025269116.1;XP_025269113.1;XP_025269115.1;E2ARB3;E2AEH5;E2AEH6		0.267868	0.810219	0.342693	0.134175	|XP_025269112.1 titin isoform X4	-3.98548221588135	-3.57455062866211	-6.4467248916626	-2.58813858032227	-5.44554138183594	-7.03014469146729	-5.99914932250977	-8.21004199981689	-4.77517414093018	-6.45589733123779	-4.7626953125	-6.84628868103027	-2.01316261291504	-3.3847827911377	-6.38589382171631	-5.35570049285889	-5.3454418182373	-4.06751441955566	-4.0242805480957	-4.30810642242432	-4.4259033203125	-5.53739452362061	-7.33374691009521	-4.69447135925293	-4.47500801086426	-10.0022344589233	-5.90763568878174	-5.10013580322266	-6.67360401153564	-6.87379932403564	-5.16421127319336	-7.47642135620117	-5.01089096069336	-5.95422840118408	-4.1498384475708	-4.7572078704834	-5.01049613952637	-5.63215065002441	-9.92828845977783	-8.72517585754395	-3.91307163238525	-4.17169570922852
1325	XP_025269126.1		0.15886	0.784	0.526648	0.158267	|XP_025269126.1 guanine deaminase [Camponotus floridanus]	2.39058780670166	2.29734992980957	-4.4020881652832	-2.74918174743652	-7.14290285110474	-7.94215106964111	0.584373474121094	-7.68688869476318	-8.33038806915283	-0.862033843994141	2.20441627502441	2.57711601257324	3.4476146697998	-3.54332160949707	-8.02634143829346	2.25917911529541	-3.24124622344971	2.9129638671875	0.495222091674805	2.76381778717041	-3.55818367004395	-0.0388984680175781	1.50876808166504	1.36739921569824	3.22372436523438	-0.996906280517578	-0.11207389831543	2.66042518615723	3.59903621673584	4.66449356079102	4.77435111999512	5.91752815246582	1.11475944519043	7.10274982452393	5.12010669708252	5.22966003417969	3.41589164733887	2.54481887817383	-3.90485668182373	-0.514407157897949	4.03249645233154	3.52219200134277
1328	XP_025269163.1;E2AZ61		2.12588	0.309083	-1.29258	-0.525578	|XP_025269163.1 uncharacterized protein LOC105257597 [Camponotus floridanus]	9.28978633880615	9.31234931945801	10.1243476867676	9.08538436889648	9.83947944641113	12.5434761047363	10.8099155426025	12.8450050354004	11.6919660568237	11.2414646148682	8.79671669006348	6.64719009399414	8.12540054321289	12.3580703735352	10.7230110168457	10.4421758651733	12.8905773162842	10.2159175872803	10.5572452545166	10.2244138717651	10.0127601623535	11.246696472168	10.2482242584229	9.98786544799805	11.8930988311768	11.0142860412598	11.2830066680908	6.38530349731445	10.566388130188	11.7388019561768	9.42067718505859	11.6613922119141	10.4533538818359	11.7463617324829	9.59892559051514	10.8068408966064	8.90926551818848	10.5095176696777	6.55547618865967	11.1790437698364	10.9736089706421	8.02142333984375
1330	XP_025269201.1;XP_025269204.1;XP_025269202.1;XP_025269214.1;XP_025269200.1;XP_025269199.1;XP_025269198.1;XP_025269197.1;XP_025269196.1;XP_025269195.1;XP_025269194.1;XP_025269193.1;XP_025269192.1;XP_025269191.1;XP_025269189.1;XP_025269188.1;XP_025269187.1;XP_025269186.1;XP_025269185.1;XP_025269184.1;XP_025269183.1;XP_025269182.1;XP_025269181.1;XP_025269180.1;XP_025269179.1;XP_025269178.1;XP_025269…		0.165518	0.881813	-0.215907	-0.0855037	|XP_025269200.1 t	-2.246169090271	-1.02364730834961	-4.65519905090332	-0.523735046386719	-3.74018669128418	-2.03007507324219	-3.5488224029541	-1.85308074951172	-3.52736377716064	-3.2606258392334	-2.47810935974121	-6.35611152648926	-0.0657482147216797	-2.12202453613281	-5.42617225646973	-3.53242778778076	-0.257661819458008	-1.46036911010742	-1.09161376953125	-3.41761302947998	-1.81381988525391	-2.51301765441895	-4.27127647399902	-2.47660446166992	-0.445133209228516	-1.90617370605469	-0.94798469543457	-1.75090789794922	-4.681715965271	-2.65635871887207	-2.11440849304199	-7.27051687240601	-1.95580673217773	-1.99674892425537	-2.11868190765381	-0.619993209838867	-3.59195137023926	-3.15243339538574	-5.64088726043701	-1.32642841339111	-2.23206424713135	-2.11038589477539
1341	XP_025269479.1;E2AJL7		0.0248197	0.98285	0.0426311	0.0163455	|XP_025269479.1 uncharacterized protein LOC105252707 [Camponotus floridanus]	3.20518207550049	2.89165115356445	3.6522102355957	-0.598094940185547	3.50134658813477	5.17217445373535	4.54888343811035	-0.787952423095703	2.2604398727417	3.53470230102539	3.27408790588379	1.10841178894043	2.63920593261719	4.46640205383301	2.21442794799805	3.51493358612061	4.83983039855957	2.28449630737305	3.87684059143066	2.90249156951904	3.38359069824219	5.58427429199219	4.12537956237793	3.88390350341797	5.61206817626953	5.72138595581055	4.52727890014648	0.177215576171875	4.35422420501709	1.93153953552246	1.02862739562988	5.42088508605957	0.107858657836914	4.58139705657959	2.63583469390869	2.91654396057129	1.6711254119873	3.78481864929199	-1.05034923553467	5.42772197723389	4.52368259429932	-0.876615524291992
1342	XP_025269485.1;XP_025269481.1;E2A1Y6		0.15629	0.863683	-0.320193	-0.113594	|XP_025269481.1 myogenesis-regulating glycosidase-like isoform X1 [Camponotus floridanus]	0.412262916564941	1.66270065307617	0.0552215576171875	1.51141548156738	2.51850891113281	-0.91319465637207	2.34503173828125	-1.36077117919922	2.19126224517822	6.36491012573242	4.86281585693359	2.26848602294922	3.00094413757324	2.78081893920898	1.37002372741699	3.55857181549072	3.9254322052002	4.36664581298828	0.272518157958984	5.71997165679932	1.6934871673584	7.28603553771973	3.94200325012207	5.39395141601563	7.85309410095215	8.30461120605469	4.0598258972168	2.8758544921875	6.12136363983154	7.82499694824219	1.16023063659668	6.35593605041504	6.61448287963867	6.74268436431885	5.43831920623779	6.97760200500488	4.5292797088623	6.4622802734375	3.02385997772217	7.41482257843018	4.31266498565674	3.36507987976074
1347	XP_025269663.1;XP_025269662.1;XP_025269661.1;XP_025269660.1;E2A1Z0;XP_025269664.1		0.0149804	0.990556	0.0246027	0.00955346	|XP_025269661.1 putative glutamate synthase [NADPH] isoform X1 [Camponotus floridanus	-7.71582317352295	-5.57816314697266	-7.04425048828125	-5.8594913482666	-8.04215717315674	-6.97832012176514	-8.94031524658203	-4.76952075958252	-7.66332817077637	-7.66707229614258	-7.8584623336792	-9.17199897766113	-4.44651412963867	-8.36543941497803	-8.26975059509277	-8.55125045776367	-8.33730697631836	-7.75052547454834	-9.94916820526123	-5.76373958587646	-7.01185178756714	-3.26937675476074	-6.00685691833496	-4.70503234863281	-4.02652549743652	-5.1645622253418	-4.3810977935791	-5.70442390441895	-4.51007175445557	-3.68783760070801	-7.27252960205078	-3.81923675537109	-3.78656768798828	-3.87814807891846	-6.50814914703369	-5.04032325744629	-6.68287086486816	-5.96722221374512	-5.08749485015869	-3.5525484085083	-5.26092052459717	-5.91975593566895
1358	XP_025269812.1		1.1046	0.5816	-0.675902	-0.284628	|XP_025269812.1 serine protease inhibitor 3/4 isoform X12 [Camponotus floridanus]	3.34025096893311	4.01740264892578	6.92503356933594	3.8863639831543	5.44209098815918	3.37220001220703	5.88253402709961	5.48392295837402	6.12266445159912	6.4929084777832	6.55263900756836	3.65056800842285	4.43149948120117	4.42171478271484	7.67977142333984	5.35164928436279	6.46209144592285	5.25950241088867	6.30426216125488	5.221848487854	4.61919403076172	4.22947883605957	4.31779098510742	4.29597473144531	4.7941780090332	5.88501358032227	5.64354705810547	2.61347961425781	4.70452976226807	4.24702644348145	4.21232032775879	4.18943023681641	4.78855514526367	1.97482585906982	5.11667346954346	5.63863754272461	4.87687301635742	4.13257789611816	2.85377216339111	3.50118541717529	4.32485294342041	3.49956321716309
1361	XP_025270228.1;E2AA82;E2AA81		0.723982	0.486489	0.91933	0.34202	tr|E2AA82|E2AA82_CAMFO Fibrillin-2 OS=Camponotus floridanus (Florida carpenter ant) OX=104421 GN=EAG_11999 PE=4 SV=1	-8.9606466293335	-7.77301692962646	-3.57873916625977	-6.94138717651367	-9.2911205291748	-7.05189323425293	-5.18096733093262	-8.44698715209961	-9.5607385635376	-5.74886608123779	-3.40198135375977	-1.62872123718262	-4.83047103881836	-7.20549821853638	-2.70591163635254	-8.8104944229126	-6.50750064849854	-8.74036121368408	-6.50079441070557	-5.95149326324463	-11.8887510299683	-6.69495916366577	-2.95564270019531	-5.22418022155762	-7.89285802841187	-7.31282234191895	-5.43994235992432	-7.71732330322266	-6.97640514373779	-5.30046081542969	-8.49051570892334	-9.05553722381592	-7.97895669937134	-9.98565006256104	-6.54237270355225	-7.59253120422363	-5.94021606445313	-8.03812026977539	-9.9553747177124	-6.88303899765015	-6.64898490905762	-9.03005695343018
1365	XP_025270284.1;XP_025270283.1;E2ALT3		0.140751	0.876972	-0.273782	-0.0989222	tr|E2ALT3|E2ALT3_CAMFO V-type proton ATPase subunit a OS=Camponotus floridanus (Florida carpenter an	-0.918854713439941	0.28826904296875	-0.154363632202148	-0.493759155273438	-0.453227996826172	-0.190135955810547	-0.468128204345703	3.23434257507324	-4.58414554595947	-1.23429679870605	-1.34559059143066	-2.57375907897949	-1.37861061096191	2.20354461669922	1.63687324523926	0.782122611999512	-1.35397148132324	-0.847562789916992	-10.535717010498	-0.942181587219238	-0.752021789550781	-1.5793571472168	1.9522705078125	-0.652990341186523	-0.110208511352539	-1.58778953552246	-0.345901489257813	-1.19991111755371	0.675976753234863	0.65898323059082	-2.36674690246582	-0.581613540649414	-1.57499885559082	-0.463259696960449	0.0652074813842773	-7.8350396156311	-2.56212043762207	-1.94422721862793	1.13416194915771	-4.60478496551514	-0.918599128723145	-1.31170845031738
1366	XP_025270286.1;E1ZYU0;XP_011261436.3		0.139621	0.875255	0.268326	0.0972991	|XP_025270286.1 putative aminopeptidase-2 [Camponotus floridanus]	-7.26680135726929	-7.11893749237061	-7.06438541412354	-4.33890724182129	-5.67448997497559	-1.71209907531738	-4.11049842834473	-5.28802108764648	-3.9142427444458	-5.82433223724365	-8.56057453155518	-5.23075675964355	-6.80982971191406	-4.822021484375	-6.83444690704346	-5.64807224273682	-4.13585186004639	-6.03923034667969	-3.17204475402832	-6.82439804077148	-6.05129623413086	-5.0203685760498	-1.89216423034668	-6.88123750686646	-4.84047985076904	-5.25297546386719	-4.41415119171143	-1.03863906860352	-7.81091833114624	-12.9840755462646	-7.22804832458496	-5.57160329818726	-4.77493095397949	-7.23042583465576	-8.76888179779053	-6.59005928039551	-6.87754440307617	-4.74260711669922	1.38467502593994	-4.08206272125244	-6.92689800262451	-4.26183128356934
1367	XP_025270291.1;E2AAT8		1.88378	0.149867	2.27046	0.789731	tr|E2AAT8|E2AAT8_CAMFO ATP synthase subunit alpha, mitochondrial OS=Camponotus floridanus (Florida carpenter ant) OX=104421 GN=EAG_05896 PE=3 SV=1	-1.99974918365479	-4.85858917236328	-1.53107833862305	-1.56218147277832	-4.57411003112793	-1.03015327453613	-2.3964786529541	-9.31919956207275	-9.1635913848877	-9.66671752929688	-4.8707218170166	-4.72450637817383	-4.66297912597656	0.873035430908203	-5.06593132019043	-1.10875797271729	-9.7351016998291	-3.07019424438477	-4.80544471740723	-6.48772382736206	-1.87574768066406	-0.569726943969727	-2.15371704101563	-1.99578666687012	-4.66833686828613	-2.0450496673584	-2.22643280029297	-1.593994140625	0.463339805603027	-1.38523864746094	-2.27370452880859	-7.29611015319824	-4.68316459655762	-6.9794864654541	-3.16582012176514	-8.67275047302246	-0.442205429077148	-0.118606567382813	-1.88188648223877	-1.46877765655518	-3.26870632171631	-0.725225448608398
1368	XP_025270599.1;XP_025270598.1;E1ZY72		0.566339	0.481275	-0.986585	-0.341971	tr|E1ZY72|E1ZY72_CAMFO Transket_pyr domain-containing protein OS=Camponotus floridanus (Florida ca	-2.25734615325928	-1.92874336242676	-6.11013793945313	-3.4680061340332	-7.06831455230713	-7.28135299682617	-6.53524303436279	-7.7203221321106	-7.53595447540283	-4.33017158508301	-4.1335620880127	-4.56167984008789	-3.92812538146973	-9.14905738830566	-3.20448112487793	-0.656599998474121	-0.777711868286133	-6.60719966888428	-6.63987731933594	-3.07299518585205	-2.37766456604004	-9.18963623046875	-9.43730640411377	-3.00851249694824	-0.730464935302734	-0.792634963989258	-1.3087158203125	-4.25933265686035	-2.3165807723999	-0.773529052734375	-6.84852027893066	-0.194272994995117	-0.23356819152832	-0.573952674865723	-3.2863302230835	-1.81832313537598	-2.77062606811523	-7.80566787719727	-3.28405284881592	-1.42309474945068	-7.68385314941406	-2.82156753540039
1369	XP_025270750.1;XP_025270749.1;XP_025270592.1;XP_025270591.1;E2AJP1;E2B077;E2AT48		0.0517417	0.970815	-0.0802483	-0.03129	|XP_025270591.1 fatty acid synthase-like [Camponotus floridanus]	-5.06803035736084	-4.7821102142334	-5.55195236206055	-7.041672706604	-7.36379194259644	-4.46820068359375	-7.93172407150269	-5.56851768493652	-10.2259578704834	-4.57611465454102	-7.64348030090332	-5.80114364624023	-7.78240585327148	-3.74413299560547	-5.00842094421387	-4.02624416351318	-4.4625358581543	-6.76256465911865	-2.68316078186035	-6.91104221343994	-2.25696563720703	-8.60606956481934	-8.16302299499512	-5.3757495880127	-5.30262756347656	-6.99509716033936	-5.68489646911621	-7.06884574890137	-7.07668399810791	-4.46038818359375	-7.4524998664856	-3.54933547973633	-5.75352382659912	-6.91712713241577	-6.49349308013916	-6.7536039352417	-5.32917213439941	-7.10675239562988	-3.78807163238525	-3.61868190765381	-8.81444835662842	-7.48300743103027
[truncated: 1 more columns]

## Sheet: Mature vs. young Student's T
id	Protein IDs	Significant	-Log p-value	q-value	Difference	Test statistic	Fasta headers	FieldMatA	FieldMatAA	FieldMatBB	FieldMatF_rep	FieldMatG	FieldMatH	FieldMatI	FieldMatK	FieldMatLmin1	FieldMatM	FieldMatNmin1	FieldMatO_rep	FieldMatP_rep	FieldMatQ	FieldMatR	FieldMatS	FieldMatT	FieldMatU	FieldMatV	FieldMatW	FieldMatX	FieldMatY_rep	FieldMatZ	FieldYoung2002	FieldYoung2004	FieldYoung2007	FieldYoung2009	FieldYoung2011	FieldYoung2012	FieldYoung2014	FieldYoung2016	FieldYoung2018	FieldYoung2020	FieldYoung2021	FieldYoung2022	FieldYoung2023	FieldYoung2026	FieldYoung2027	FieldYoung2028	FieldYoung2029	FieldYoung2030	FieldYoung2033
273	E2A4U9;XP_019882208.1;XP_011251636.1;XP_011251639.2	+	2.77758	0.0065	-3.24387	-1.09447	tr|E2A4U9|E2A4U9_CAMFO Guanine deaminase OS=Camponotus floridanus (Florida carpenter ant) OX=104421 GN=EAG_04593 PE=4 SV=1	-7.49688386917114	-4.12503242492676	-3.78182792663574	-5.33008575439453	-7.32201766967773	-6.21484661102295	-9.19250392913818	-7.57134532928467	-10.8776760101318	0	-1.94461059570313	-7.78263473510742	-2.47731399536133	-1.8416690826416	-4.90419960021973	-0.654248237609863	-1.29787826538086	-0.990566253662109	-7.85837125778198	-0.311501502990723	-3.60289573669434	0.157848358154297	-1.56839561462402	-0.262144088745117	1.6225757598877	0.568902969360352	0.896066665649414	-9.30169677734375	-1.39207553863525	1.66486358642578	-3.91330146789551	0.981277465820313	1.31475257873535	1.51464176177979	-2.19029712677002	0.689233779907227	-3.28180694580078	-1.09380722045898	-7.09529542922974	1.70616245269775	-0.0835447311401367	-1.69896507263184
447	E2AC94	+	6.52217	0	4.9709	1.76687	tr|E2AC94|E2AC94_CAMFO Hexamerin OS=Camponotus floridanus (Florida carpenter ant) OX=104421 GN=EAG_02268 PE=4 SV=1	2.51410388946533	-0.394281387329102	2.0573558807373	-0.741737365722656	2.69031715393066	0.447597503662109	3.20047187805176	0	0.538878440856934	3.06767272949219	1.21824264526367	5.15465354919434	-0.832561492919922	-0.465511322021484	5.75334548950195	-1.28743267059326	0.630800247192383	-1.26624298095703	0.00718879699707031	1.30360126495361	3.24655723571777	-1.94946479797363	-0.731067657470703	-0.472959518432617	-2.1312198638916	-2.62679672241211	-8.08913803100586	-0.277616500854492	-6.28197765350342	-7.06017446517944	1.80016899108887	-5.22512626647949	-2.97376823425293	-6.91068267822266	-3.58689022064209	-7.82658672332764	-1.74092292785645	-4.39850425720215	-0.620230674743652	-3.56956005096436	-11.1679096221924	-2.25525093078613
457	XP_011255653.1;E2ACR9	+	3.33282	0	-4.0163	-1.31443	tr|E2ACR9|E2ACR9_CAMFO Calmodulin OS=Camponotus floridanus (Florida carpenter ant) OX=104421 GN=EAG_15893 PE=3 SV=1	-3.17758464813232	-0.329755783081055	-1.35656356811523	-7.98605060577393	-7.57307195663452	-0.23176383972168	-5.24810791015625	-1.32575225830078	-8.48631477355957	2.12780952453613	1.73725509643555	-2.82789421081543	-4.94869089126587	2.21137809753418	-2.44911575317383	1.74966907501221	1.6980094909668	3.02997779846191	-8.24586391448975	1.57095623016357	-0.263635635375977	-6.47190475463867	3.03458786010742	-7.78952789306641	3.49330520629883	4.4682502746582	1.53883743286133	0.34184455871582	2.28790378570557	4.39228057861328	-1.83477020263672	3.97501564025879	3.89943313598633	3.90135860443115	2.60896587371826	3.63561248779297	1.48945617675781	3.63335609436035	2.31668186187744	2.60692691802979	2.440749168396	0.979297637939453
763	E2ARJ0;XP_011262743.2	+	2.57557	0.0262222	-2.68493	-0.945664	tr|E2ARJ0|E2ARJ0_CAMFO Guanine deaminase OS=Camponotus floridanus (Florida carpenter ant) OX=104421 GN=EAG_03375 PE=4 SV=1	-1.89890384674072	-0.70741081237793	-6.96052885055542	-3.97317504882813	-3.46935844421387	-6.9543604850769	-3.51407241821289	-7.8481502532959	-4.06221866607666	-7.11329746246338	-1.6431770324707	0	0.586385726928711	-4.03741645812988	-6.51743602752686	-1.40804576873779	-6.43242263793945	-0.921173095703125	-4.09177589416504	-1.99744892120361	-6.84533977508545	-2.98724365234375	-1.38949775695801	-2.68650245666504	-1.4504508972168	-8.98078346252441	-2.87579345703125	0.90034294128418	-1.52778911590576	-0.632719039916992	1.71964073181152	2.45074272155762	-2.26045799255371	2.63827800750732	1.63540554046631	1.41578483581543	0.57554817199707	-1.684326171875	-5.86939525604248	-4.00017261505127	0.192770957946777	0.789718627929688
1031	XP_011252932.2;E2A7K7	+	4.49348	0.046	2.2004	0.890463	tr|E2A7K7|E2A7K7_CAMFO Apolipophorins OS=Camponotus floridanus (Florida carpenter ant) OX=104421 GN=EAG_00653 PE=4 SV=1	2.02529621124268	3.18315696716309	5.67823028564453	4.21337509155273	4.40310478210449	1.87068367004395	5.34542655944824	5.73111343383789	3.9328145980835	5.39577674865723	5.84755897521973	5.25435447692871	2.7758731842041	2.62104797363281	8.38774871826172	3.89992809295654	3.73586463928223	2.95025444030762	4.7938404083252	3.30065250396729	3.15492820739746	4.66177368164063	3.19967079162598	4.11892127990723	1.29808807373047	2.46828651428223	1.38460540771484	1.37996101379395	4.08570384979248	0.700401306152344	1.23863792419434	0.655914306640625	0.360403060913086	1.00002384185791	1.44163417816162	0.811870574951172	3.12421035766602	-0.0793495178222656	5.03188419342041	4.51401805877686	0.953137397766113	1.11469268798828
1051	XP_011255281.1;E2AC28;E2AC29	+	6.88767	0	-5.95078	-2.0279	tr|E2AC28|E2AC28_CAMFO GMC_OxRdtase_N domain-containing protein OS=Camponotus floridanus (Florida carpenter ant) OX=104421 GN=EAG_13496 PE=4 SV=1	-7.00231552124023	-6.77445602416992	-7.24195957183838	-0.444082260131836	-2.38989448547363	-8.58010292053223	-4.78438186645508	-1.86301612854004	-9.20431613922119	1.95976638793945	2.37211799621582	0.27592658996582	-3.61019325256348	-8.63015842437744	-0.654170989990234	-1.77871608734131	-0.317184448242188	-2.59924507141113	-3.24287414550781	-2.02992916107178	-2.58371353149414	1.82332801818848	-8.07849216461182	2.93150901794434	4.56499099731445	5.61508560180664	2.13068199157715	-0.095977783203125	2.41442394256592	4.44118881225586	-0.718910217285156	3.1732006072998	4.88443565368652	4.34140491485596	2.35692310333252	5.58395195007324	0.556379318237305	3.37707328796387	0.914410591125488	6.28943538665771	-0.646130561828613	1.91367149353027
1224	XP_025262495.1	+	4.29867	0	4.03095	1.39479	|XP_025262495.1 pheromone-binding protein Gp-9-like [Camponotus floridanus]	-1.09361934661865	-1.69694519042969	1.45368766784668	3.7988224029541	1.85626411437988	0.256240844726563	2.43463897705078	2.75669097900391	1.17866039276123	0.819192886352539	-0.384220123291016	-1.64383125305176	-2.9632396697998	-9.19303035736084	2.70863723754883	0.133419990539551	2.20261192321777	0	2.45283126831055	-0.953221321105957	0.281280517578125	-0.335357666015625	-1.7117977142334	2.18190765380859	-6.1438102722168	-1.20832061767578	-6.46383619308472	-5.74404907226563	-2.28373050689697	-9.63962650299072	-3.52577972412109	-5.61621046066284	-1.07326507568359	-5.51856470108032	-2.35052967071533	-7.86261606216431	-2.06220245361328	-2.27852630615234	-0.0418272018432617	-7.9282546043396	-7.7288384437561	-2.34200859069824
1253	XP_025263365.1	+	2.57808	0.002	-3.7617	-1.18479	|XP_025263365.1 alpha-amylase A-like [Camponotus floridanus]	-5.37232494354248	-5.54870080947876	-4.83324289321899	-1.53325843811035	-7.97290277481079	-6.86318111419678	-2.60400390625	-1.87808418273926	-4.68459796905518	4.15385437011719	1.73521995544434	0.389194488525391	-7.08130359649658	-7.07891845703125	-2.45347785949707	-8.54722023010254	-2.35531425476074	-0.230428695678711	-2.96888542175293	1.98014163970947	-2.80807876586914	-1.0247974395752	-3.50184631347656	0.792619705200195	5.24702453613281	-7.32109355926514	0.457107543945313	0.623407363891602	3.75563716888428	2.70404624938965	-0.503366470336914	-9.8144006729126	3.3958797454834	5.45081615447998	3.82318592071533	3.3538818359375	0.303979873657227	3.73601722717285	-0.0807561874389648	6.56922435760498	-1.14720058441162	-6.11718273162842
1325	XP_025269126.1	+	3.53514	0	-4.28075	-1.38942	|XP_025269126.1 guanine deaminase [Camponotus floridanus]	2.39058780670166	2.29734992980957	-4.4020881652832	-2.74918174743652	-7.14290285110474	-7.94215106964111	0.584373474121094	-7.68688869476318	-8.33038806915283	-0.862033843994141	2.20441627502441	2.57711601257324	3.4476146697998	-3.54332160949707	-8.02634143829346	2.25917911529541	-3.24124622344971	2.9129638671875	0.495222091674805	2.76381778717041	-3.55818367004395	-0.0388984680175781	1.50876808166504	1.36739921569824	3.22372436523438	-0.996906280517578	-0.11207389831543	2.66042518615723	3.59903621673584	4.66449356079102	4.77435111999512	5.91752815246582	1.11475944519043	7.10274982452393	5.12010669708252	5.22966003417969	3.41589164733887	2.54481887817383	-3.90485668182373	-0.514407157897949	4.03249645233154	3.52219200134277
1342	XP_025269485.1;XP_025269481.1;E2A1Y6	+	4.352	0.00685714	-2.91473	-1.10487	|XP_025269481.1 myogenesis-regulating glycosidase-like isoform X1 [Camponotus floridanus]	0.412262916564941	1.66270065307617	0.0552215576171875	1.51141548156738	2.51850891113281	-0.91319465637207	2.34503173828125	-1.36077117919922	2.19126224517822	6.36491012573242	4.86281585693359	2.26848602294922	3.00094413757324	2.78081893920898	1.37002372741699	3.55857181549072	3.9254322052002	4.36664581298828	0.272518157958984	5.71997165679932	1.6934871673584	7.28603553771973	3.94200325012207	5.39395141601563	7.85309410095215	8.30461120605469	4.0598258972168	2.8758544921875	6.12136363983154	7.82499694824219	1.16023063659668	6.35593605041504	6.61448287963867	6.74268436431885	5.43831920623779	6.97760200500488	4.5292797088623	6.4622802734375	3.02385997772217	7.41482257843018	4.31266498565674	3.36507987976074
62	XP_025267081.1;XP_011269145.1;XP_011268884.1;E1ZUV1		0.259892	0.692608	-0.513348	-0.180059	tr|E1ZUV1|E1ZUV1_CAMFO V-type proton ATPase su	-6.20437145233154	-3.24534034729004	-4.27644729614258	-1.5152416229248	-4.96738433837891	-1.1004524230957	-4.04530715942383	-6.81097984313965	-10.9051189422607	-1.19145393371582	-3.46723556518555	-6.39653587341309	-4.37990760803223	-7.49987268447876	-4.58218193054199	-2.55719089508057	-0.297679901123047	-3.28467178344727	-10.8713397979736	-3.9875955581665	-2.87276458740234	-3.06661796569824	-1.57509994506836	-3.96560668945313	0.522958755493164	-1.19612121582031	-1.9811840057373	-1.59236717224121	-2.70737552642822	-3.23925018310547	-3.5260009765625	-9.34571743011475	-4.30763244628906	-3.3174524307251	-9.3848934173584	-1.69120216369629	-2.4514217376709	-4.28506088256836	-1.14837551116943	-8.62577724456787	-6.97784948348999	-3.38466835021973
96	E1ZWP8		0.26665	0.752062	0.412406	0.154499	tr|E1ZWP8|E1ZWP8_CAMFO Peptidase A1 domain-containing protein OS=Camponotus floridanus (Florida carpenter ant) OX=104421 GN=EAG_09731 PE=3 SV=1	0.480410575866699	0.692209243774414	2.08905601501465	3.21528434753418	1.22220420837402	4.20165061950684	4.94692993164063	5.14056205749512	3.3698148727417	2.67848014831543	0.357635498046875	-4.65371894836426	-2.01517677307129	4.46955490112305	4.88630867004395	2.11974239349365	4.47177696228027	2.23524856567383	0.894582748413086	1.15738964080811	1.6030330657959	0.835393905639648	2.19998931884766	2.43371772766113	3.6453742980957	1.32203674316406	1.85797882080078	-4.18034553527832	1.92867183685303	2.77059555053711	0.382736206054688	1.92935562133789	1.35535621643066	3.00541973114014	1.13255405426025	2.23427200317383	1.54916954040527	2.01052856445313	-2.23601818084717	2.43994045257568	4.50613880157471	-0.00464248657226563
102	XP_011258052.1;E1ZX35;E2ANB5;XP_011262825.1;E2ARN6;E2ARF2;XP_011262682.2;XP_011261161.2		0.435462	0.636929	0.667064	0.244247	tr|E1ZX35|E1ZX35_CAMFO Ubiquitin-like domain-containing protein OS=Camponotus floridanus (Florida carpenter ant) OX=104421 GN=EAG_06521 PE=4 SV=1;tr|E2ANB5|E2ANB5_CAMFO Ubiquitin OS	-0.108805656433105	3.86492347717285	3.16720199584961	1.14257049560547	2.48089027404785	1.66110229492188	3.95177841186523	1.3681468963623	2.1920862197876	2.23746490478516	2.7949333190918	2.89929580688477	1.11938858032227	1.66650009155273	1.91868019104004	3.39995670318604	3.31114768981934	3.40728759765625	1.83932113647461	2.82571506500244	3.54248428344727	-0.54852294921875	5.07224082946777	1.87525367736816	3.7978572845459	0.95744514465332	2.43570899963379	2.72367286682129	3.33864498138428	3.29519653320313	2.25027847290039	-11.319037437439	1.57639694213867	2.99065685272217	1.42468166351318	1.75684928894043	1.67230415344238	3.87323379516602	4.02940464019775	0.630063056945801	2.33988285064697	2.2879467010498
114	XP_011260780.1;E1ZXJ7		1.36064	0.212686	-1.60033	-0.578049	tr|E1ZXJ7|E1ZXJ7_CAMFO Tyrosinase_Cu-bd domain-containing protein OS=Camponotus floridanus (Florida carpenter ant) OX=104421 GN=EAG_04466 PE=4 SV=1	-5.3989896774292	-2.27441024780273	-1.87072563171387	3.85415649414063	-3.43024253845215	-5.38293695449829	-3.54523277282715	0.70036506652832	-1.79569530487061	-1.69165992736816	-3.48927688598633	0.93031120300293	-1.82907867431641	-2.95070648193359	0.0975570678710938	-2.68683338165283	-8.23139190673828	-5.7149829864502	-2.71532821655273	-4.91753482818604	-2.52360916137695	-2.63752937316895	-6.12070274353027	-2.2159595489502	0.284700393676758	0.196632385253906	0.867538452148438	-1.29946708679199	0.354022026062012	-2.65086936950684	-6.98571586608887	1.58696746826172	1.01055145263672	-1.55424785614014	-0.381623268127441	0.139188766479492	-2.24992561340332	-2.6524829864502	-0.107169151306152	-6.79848575592041	0.869355201721191	-2.35938835144043
117	XP_019884091.1;E1ZXR7		0.983449	0.204588	-1.81139	-0.586391	tr|E1ZXR7|E1ZXR7_CAMFO Zinc carboxypeptidase A 1 OS=Camponotus floridanus (Florida carpenter ant) OX=104421 GN=EAG_14623 PE=4 SV=1	2.15918445587158	0.902824401855469	0.774116516113281	-2.40602493286133	2.2165641784668	-0.804443359375	-3.59701156616211	-8.3264684677124	-1.04710292816162	-1.00718879699707	1.09238433837891	1.25005340576172	3.65189552307129	-1.06561088562012	-8.1265869140625	-1.59073352813721	-9.68574905395508	3.63289642333984	-5.8436222076416	3.18412303924561	1.57713890075684	-6.68248224258423	-0.473878860473633	-0.294918060302734	-0.634727478027344	-3.23205375671387	-8.07546997070313	3.69185447692871	-0.838858604431152	-3.54052925109863	2.94228363037109	0.619085311889648	0.270458221435547	-1.11308193206787	1.97354221343994	3.09601211547852	3.59031677246094	1.90837287902832	3.82845020294189	3.22399425506592	-0.508498191833496	3.14287185668945
130	XP_011263402.1;E1ZY32		0.21743	0.691905	-0.544017	-0.178542	tr|E1ZY32|E1ZY32_CAMFO Uncharacterized protein OS=Camponotus floridanus (Florida carpenter ant) OX=104421 GN=EAG_09984 PE=4 SV=1	0.149544715881348	-1.1628303527832	1.24501800537109	1.12123107910156	-1.21512031555176	-6.46709537506104	1.55197715759277	-9.50611305236816	0.632956504821777	0.0818862915039063	2.57495498657227	2.37051582336426	0.870494842529297	-7.91941738128662	0.565185546875	3.11627101898193	1.26628303527832	2.78208160400391	1.68118286132813	1.35906505584717	0.544792175292969	2.96867942810059	2.78253936767578	1.63947677612305	-0.657051086425781	2.03523254394531	1.53516387939453	0.749078750610352	2.75586795806885	-0.118459701538086	3.24570465087891	1.79399871826172	-1.34980392456055	3.08238124847412	1.99426746368408	1.48764610290527	1.5738410949707	2.59021759033203	3.38194179534912	-9.60384750366211	-7.85098838806152	1.68025207519531
157	XP_011268452.1;E1ZZT0		0.462376	0.489506	0.95982	0.319476	tr|E1ZZT0|E1ZZT0_CAMFO Calreticulin OS=Camponotus floridanus (Florida carpenter ant) OX=104421 GN=EAG_13074 PE=3 SV=1	1.088791847229	1.32720184326172	-0.684213638305664	1.22966575622559	-0.857669830322266	-3.44220542907715	-2.7274112701416	-7.1328182220459	-7.82642221450806	-1.05666542053223	-2.43704795837402	-5.75653457641602	-0.730783462524414	-7.07898283004761	-4.60412979125977	-1.77163982391357	-2.92269515991211	1.44598388671875	-6.54892206192017	0.69212818145752	2.37265205383301	-5.54572725296021	0.353946685791016	-0.140928268432617	-3.474609375	-0.371076583862305	-2.31526756286621	-0.446918487548828	-0.859686851501465	0.196878433227539	-1.09078598022461	-8.56039428710938	-9.67901611328125	-7.0295033454895	-7.72699928283691	-7.36341238021851	-2.7397632598877	-3.13700294494629	-1.35125637054443	-7.77609872817993	-0.656371116638184	0.380226135253906
163	XP_011268522.1;E1ZZX0		0.662819	0.694271	0.453872	0.192133	tr|E1ZZX0|E1ZZX0_CAMFO ADP,ATP carrier protein 2 OS=Camponotus floridanus (Florida carpenter ant) OX=104421 GN=EAG_16360 PE=3 SV=1	1.04661846160889	0.949710845947266	1.6301383972168	1.28336524963379	0.189062118530273	1.44617080688477	1.17093276977539	1.06411361694336	-0.521481513977051	1.15770149230957	0.116355895996094	-1.36028861999512	-0.0861282348632813	1.2358341217041	0.597219467163086	3.37825107574463	2.41530990600586	0.810979843139648	-0.277400970458984	1.01908397674561	1.3518238067627	0.30003547668457	1.35037422180176	2.02340888977051	1.33041763305664	-0.235130310058594	1.47549629211426	0.567045211791992	1.14136409759521	0.340005874633789	0.531599044799805	-3.84599494934082	0.410793304443359	-0.404202461242676	-0.224221229553223	-0.896839141845703	-0.325284957885742	1.97226333618164	-0.0609712600708008	-0.274991035461426	1.81066799163818	0.766529083251953
179	E2A0I0;XP_011268828.1;XP_011268827.1		0.0380556	0.943325	-0.0818701	-0.0295305	tr|E2A0I0|E2A0I0_CAMFO Gal_mutarotas_2 domain-containing protein OS=Camponotus floridanus (Florida carpenter ant) OX=104421 GN=EAG_11174 PE=3 SV=1;|XP_011268827.1 neutral alpha-g	-2.11171817779541	-1.86338233947754	-3.7461051940918	-1.62906646728516	-8.01730537414551	-0.132577896118164	-4.98359298706055	-2.11068916320801	-7.44918823242188	-0.797374725341797	-5.02798461914063	-4.61518478393555	-5.34754943847656	-0.723060607910156	-2.84668922424316	-1.90690135955811	0.611295700073242	-1.75371551513672	-3.68067169189453	-2.69246006011963	-1.54145240783691	-3.38557624816895	-8.27909851074219	-4.62443923950195	-0.597629547119141	-3.78940773010254	-8.04178619384766	-1.06926536560059	-0.0927000045776367	-0.0211811065673828	-3.21740531921387	-2.45672225952148	-2.88710594177246	-9.02009963989258	-0.776686668395996	-6.94815063476563	-2.69143867492676	-1.37557983398438	-2.17517185211182	-6.61478137969971	-2.65858364105225	-1.83633422851563
180	XP_011268843.1;XP_011265835.1;XP_011264345.1;XP_011264342.1;E2AUU4;E2A0I7		1.19885	0.229838	1.58397	0.55977	tr|E2AUU4|E2AUU4_CAMFO Histone H2B OS=Camponotus flo	0.166279792785645	1.4564094543457	3.48622894287109	1.20563697814941	-0.360218048095703	1.22389030456543	-7.46854877471924	1.37180709838867	-8.28287029266357	0.39488410949707	-1.5632152557373	0.419282913208008	-0.0272102355957031	-0.906206130981445	-0.645923614501953	0.531340599060059	2.75104522705078	-0.126556396484375	0.143125534057617	-0.245722770690918	1.72919845581055	-0.0849571228027344	-0.11918830871582	-1.67960548400879	0.751873016357422	0	-0.402637481689453	1.72418785095215	-5.02290296554565	-0.429380416870117	1.16144943237305	-0.795576095581055	0.219575881958008	-5.43045473098755	-6.40684223175049	0.186834335327148	-4.9047966003418	-1.22175216674805	-3.37821102142334	-0.701613426208496	0.763415336608887	-2.73280334472656
181	XP_011268873.1;XP_011268841.1;XP_011264343.1;XP_011264339.1;E2AUU5;E2AUU1;E2A0I8;XP_011252166.1;E2A633;E2AGF1;XP_011257651.1;XP_011257652.1		0.0165145	0.965176	-0.0434744	-0.0148699	tr|E2AUU5|E2AUU5_CAMFO Histone H2A OS=Camponotus flo	2.32467174530029	0.512458801269531	2.79076385498047	1.25591659545898	-0.894935607910156	-8.1112585067749	1.02744483947754	-8.61172676086426	0.505631446838379	0.265239715576172	-1.3566951751709	1.40452003479004	1.5706729888916	-1.52616119384766	-0.0518169403076172	0.238129615783691	2.50510597229004	-0.558755874633789	0.217220306396484	-0.628535270690918	1.15572166442871	1.65431213378906	-0.807575225830078	-7.33991527557373	2.42299842834473	1.1443977355957	1.96005058288574	1.68394470214844	1.19117641448975	0.513065338134766	1.7619571685791	-0.693626403808594	2.18353652954102	-10.2939863204956	-1.30852222442627	1.70337295532227	-0.20936393737793	-0.238275527954102	-1.89969539642334	0.428896903991699	2.17953395843506	0.0504016876220703
182	XP_011268846.1;XP_011265836.1;XP_011264341.1;E2A0J1		0.809576	0.648039	0.555004	0.23289	tr|E2A0J1|E2A0J1_CAMFO Histone H4 OS=Camponotus floridanus (Florida carpenter ant) OX=104421 GN=EAG_09814	3.01476573944092	2.9175968170166	5.23216819763184	4.12421607971191	2.64232063293457	2.93095970153809	2.93975830078125	4.02592849731445	2.71524524688721	2.12152481079102	0.772304534912109	1.12273216247559	2.4323902130127	3.01501274108887	1.58041954040527	3.96228313446045	3.40484619140625	3.413818359375	3.39513397216797	1.80466938018799	3.1484203338623	2.99374008178711	2.66571235656738	2.1908073425293	4.22969055175781	1.46646690368652	3.68255424499512	2.35798263549805	3.47035694122314	1.24176216125488	3.34482192993164	1.07835578918457	3.65058517456055	-1.40521907806396	0.808609962463379	4.10835647583008	2.12301826477051	2.67836380004883	0.99448299407959	0.640191078186035	4.51431560516357	2.37731170654297
222	XP_011269703.1;XP_011269702.1;E2A252;XP_011257369.1;XP_011257368.1;XP_011257367.1;E2AFT7		0.760886	0.370483	1.23211	0.426429	tr|E2A252|E2A252_CAMFO Elongation factor 1-alpha OS=Camponotus floridanus (Florida carpenter ant) OX=104421 GN=EAG_13423 PE=3	0.768036842346191	4.08086776733398	5.08976936340332	1.49383926391602	0.715936660766602	5.22136497497559	1.95299911499023	5.9376163482666	0.578736305236816	5.14226150512695	-0.549116134643555	2.23728942871094	-0.11125373840332	-2.10193824768066	4.43898010253906	1.34645175933838	6.8813533782959	4.9355640411377	1.00238990783691	0.480561256408691	4.06258010864258	0.0388984680175781	0.285266876220703	0.879978179931641	5.07079315185547	4.47510528564453	5.08641624450684	-0.176862716674805	1.19533252716064	-0.627664566040039	2.97907066345215	-7.23304748535156	5.17242240905762	-3.40666675567627	-2.40170764923096	5.10017013549805	-0.391214370727539	0.615909576416016	0.164139747619629	5.67374897003174	-0.00707721710205078	0.0899906158447266
236	XP_011250693.1;E2A358		0.731242	0.401097	1.15766	0.404773	tr|E2A358|E2A358_CAMFO SERPIN domain-containing protein OS=Camponotus floridanus (Florida carpenter ant) OX=104421 GN=EAG_01413 PE=3 SV=1	-6.14215040206909	-3.66512870788574	-0.983119964599609	-1.67129898071289	-6.19799327850342	-2.97919464111328	-1.1911735534668	-8.54504299163818	-1.56072330474854	-0.729288101196289	1.16155815124512	1.55390548706055	-3.38685607910156	-6.76948642730713	2.12310600280762	-7.80940723419189	-1.43346214294434	-3.43549156188965	-4.94692420959473	-5.2588586807251	-5.92555236816406	-3.86534309387207	-4.20549201965332	-2.90287590026855	-2.6436710357666	-2.28352737426758	-1.54018211364746	-2.7684383392334	-0.922820091247559	-3.54935455322266	-3.76375198364258	-10.4738550186157	-6.43046092987061	-9.27964878082275	-5.97873258590698	-2.80768394470215	-3.23551177978516	-3.76790237426758	-1.37901592254639	-7.02802658081055	-7.16208076477051	-4.42074966430664
240	E2A3I0;XP_011250877.1;XP_011250876.1;XP_011250875.1;XP_011250874.1		0.0964326	0.90112	-0.203714	-0.0726901	tr|E2A3I0|E2A3I0_CAMFO 14_3_3 domain-containing protein OS=Camponotus floridanus (Florida carpenter ant) OX=104421 GN=EAG_13996 PE=3 SV=1;|XP_011250876.1 14-3-3 protein zeta isoform X3 [C	-0.918400764465332	-1.30239677429199	-2.24719429016113	-0.281272888183594	-3.55136299133301	-1.8570556640625	-1.71659278869629	-1.77775955200195	-8.57277774810791	-6.55848217010498	-3.95398902893066	-2.19442749023438	-2.49533081054688	-2.35510063171387	-1.99114608764648	-2.44596767425537	-8.48251438140869	-7.78689956665039	-2.03029441833496	-4.20424365997314	-3.20553779602051	-8.81742668151855	-1.56752967834473	-1.31253814697266	-9.08533668518066	-7.35249853134155	-3.73969268798828	-2.24056434631348	-1.48078060150146	-1.33133125305176	-3.07434844970703	-4.47927856445313	-3.68468856811523	-2.41066455841064	-2.17680263519287	-8.45597553253174	-1.91199493408203	-2.08703231811523	-0.783074378967285	-6.85955095291138	-1.23328113555908	-1.01412010192871
275	XP_011251688.1;E2A4X8		1.19739	0.227667	-1.44738	-0.524646	tr|E2A4X8|E2A4X8_CAMFO Trehalase OS=Camponotus floridanus (Florida carpenter ant) OX=104421 GN=EAG_13710 PE=3 SV=1	0.017186164855957	0.383138656616211	1.03337860107422	-0.805931091308594	1.83601570129395	-2.61654663085938	1.59245109558105	-7.95817470550537	-0.81914234161377	-0.188327789306641	2.61615562438965	1.72610855102539	0.619003295898438	-10.9275674819946	2.59474182128906	1.20913982391357	-1.33543968200684	0.82548713684082	-4.19889068603516	0.748675346374512	-0.692556381225586	-1.40935134887695	0.620635986328125	0.00782394409179688	0.143125534057617	0.593631744384766	0.913148880004883	-0.176748275756836	0.0367326736450195	0.457914352416992	0.73267936706543	1.4127197265625	0.816627502441406	1.45573329925537	0.95424747467041	4.11926078796387	0.316703796386719	0.8377685546875	2.70846462249756	-0.120104789733887	0.727967262268066	-0.975629806518555
277	E2A543;XP_025262620.1		0.612458	0.373705	-1.29393	-0.41809	tr|E2A543|E2A543_CAMFO Prostaglandin reductase 1 OS=Camponotus floridanus (Florida carpenter ant) OX=104421 GN=EAG_03035 PE=4 SV=1;|XP_025262620.1 prostaglandin reductase 1 [Camponotus floridanus]	-0.129551887512207	0.0459842681884766	-3.39631462097168	-2.30021095275879	-6.76771783828735	3.21858406066895	-2.5351448059082	5.80697822570801	-10.0145654678345	-6.40178155899048	-0.272979736328125	-0.478916168212891	-0.0879802703857422	3.27635192871094	1.74188804626465	0.614426612854004	-1.88855361938477	0.353376388549805	-8.01745414733887	0.277058601379395	-0.771158218383789	-7.80546379089355	0.724187850952148	-2.53057098388672	-8.2157735824585	1.15033912658691	0.368503570556641	0.00537681579589844	1.22852802276611	1.30224418640137	0.0377635955810547	1.0008659362793	0.197917938232422	2.05938625335693	0.487654685974121	-0.0474872589111328	0.941768646240234	2.40836143493652	2.35009288787842	-9.08894538879395	0.781743049621582	0.253881454467773
288	E2A5R3;XP_011252033.1;XP_011252032.1;XP_011252034.1;XP_011252062.1		0.947365	0.419824	-1.00327	-0.383032	tr|E2A5R3|E2A5R3_CAMFO TPR_REGION domain-containing protein OS=Camponotus floridanus (Florida carpenter ant) OX=104421 GN=EAG_13367 PE=4 SV=1;|XP_011252032.1 uncharacteri	-0.520586967468262	-0.261882781982422	-1.86112976074219	0.0563240051269531	-1.82154273986816	-0.867887496948242	-1.53495407104492	-8.00323390960693	-3.10682964324951	-2.39285278320313	-1.80519866943359	-0.53125	-0.611030578613281	-1.9338436126709	-1.5399341583252	-2.1889009475708	-6.86102151870728	-2.29220199584961	-2.89061546325684	-3.03197956085205	-0.738344192504883	-10.9746580123901	-2.64583778381348	-1.02022933959961	-1.59307670593262	-2.20792770385742	-2.07133865356445	-1.03744888305664	-0.065159797668457	-0.902484893798828	-1.23835563659668	-1.99777793884277	-3.59895133972168	-1.16632175445557	-1.2496919631958	-1.37177276611328	-2.22393608093262	-2.58880615234375	-0.223223686218262	-1.56223964691162	-1.42306041717529	-0.571723937988281
291	XP_019882306.1;E2A5W9		0.148792	0.837226	-0.333173	-0.115305	tr|E2A5W9|E2A5W9_CAMFO Peptidase S1 domain-containing protein OS=Camponotus floridanus (Florida carpenter ant) OX=104421 GN=EAG_05387 PE=3 SV=1	5.30535984039307	2.90095520019531	3.86090850830078	0.428291320800781	3.83069801330566	-0.90257453918457	-1.81749153137207	-7.43607616424561	1.03930568695068	2.17544174194336	3.32340049743652	3.34168434143066	5.72708129882813	-0.770059585571289	-1.3375415802002	0.781521797180176	-0.582782745361328	5.46863174438477	-0.963201522827148	4.92672634124756	4.11704254150391	1.75116348266602	1.89575576782227	1.02132034301758	-2.15674018859863	-2.86172103881836	-1.92328262329102	5.52800369262695	0.889519691467285	-0.639883041381836	5.07596778869629	0.35197639465332	2.97987365722656	-0.846871376037598	2.74250316619873	2.50854873657227	5.44878768920898	2.53271293640137	5.15712451934814	4.9539270401001	1.17369556427002	4.5545711517334
300	XP_011252301.1;E2A6C9		1.2285	0.112706	-2.40449	-0.742481	tr|E2A6C9|E2A6C9_CAMFO Protein G12 OS=Camponotus floridanus (Florida carpenter ant) OX=104421 GN=EAG_09904 PE=4 SV=1	-0.324606895446777	-4.27872085571289	-2.3056468963623	-2.2596263885498	1.85957717895508	-8.49543571472168	-7.17931842803955	-1.35899925231934	-10.3438339233398	-1.77375602722168	-4.04038619995117	1.52290725708008	-0.745990753173828	-2.44129371643066	-8.53903675079346	-7.49834537506104	-1.6175365447998	1.64010620117188	-1.7287654876709	-2.7773904800415	-0.614469528198242	-7.53106594085693	-7.69168138504028	0.884511947631836	2.43707466125488	-0.518125534057617	2.11700630187988	6.10186386108398	-0.438694953918457	-7.66071557998657	6.07327842712402	-2.44805526733398	-6.64079666137695	-2.30930233001709	-9.94372081756592	-2.57169342041016	5.78988075256348	-1.71293258666992	-3.39876842498779	-2.40750408172607	-6.52979516983032	1.90141296386719
303	XP_011252356.1;E2A6I4		0.171105	0.834986	-0.312737	-0.11418	tr|E2A6I4|E2A6I4_CAMFO Vacuolar ATP synthase catalytic subunit A OS=Camponotus floridanus (Florida carpenter ant) OX=104421 GN=EAG_16297 PE=3 SV=1	-0.0801630020141602	0.517389297485352	-1.11657524108887	1.17792320251465	-1.26312828063965	-2.70913124084473	-0.356594085693359	-3.42340850830078	-3.49826908111572	-9.38692092895508	-1.51252365112305	-3.66436767578125	-0.705535888671875	-5.87722635269165	-3.50407981872559	-0.81740665435791	-4.271240234375	-2.97365379333496	-8.26912403106689	-0.95967960357666	-0.268218994140625	0.801101684570313	1.15482330322266	-0.964305877685547	-4.49449443817139	-3.46558570861816	-4.68455123901367	0.347745895385742	-1.94111728668213	-4.44237899780273	-1.53945541381836	-0.962154388427734	-4.05411148071289	-2.59075260162354	-0.522158622741699	-4.04777336120605	-1.07673263549805	0.316673278808594	1.00334453582764	-3.34606456756592	-1.86784648895264	0.467575073242188
305	XP_011252428.1;E2A6N1;XP_025262425.1;XP_011252154.1;XP_011252142.1;E1ZVV0;E1ZVU9;XP_025262454.1;XP_025262453.1;XP_025262452.1;XP_025262451.1		0.0918453	0.940127	-0.111717	-0.0454105	tr|E2A6N1|E2A6N1_CAMFO Tropomyosin-1 OS=Camponotus floridanus (Florida carpenter ant) OX=104421 GN=EAG_00808 PE=3 SV=1	1.69161891937256	2.92299461364746	0.988075256347656	3.24811935424805	1.86246871948242	-0.382146835327148	2.08192253112793	-0.0357322692871094	-2.17979526519775	-1.13581275939941	0.0968894958496094	-2.14448356628418	2.81014060974121	0.918453216552734	-1.62749862670898	1.15098094940186	1.20893859863281	1.38603210449219	2.12635612487793	0.26648998260498	2.11778259277344	-0.371816635131836	0.728246688842773	2.61843872070313	1.51284027099609	-1.84138488769531	0.671680450439453	0.923397064208984	0.778458595275879	0.436519622802734	0.150222778320313	-1.4073371887207	2.73036003112793	-0.0491819381713867	1.46723651885986	0.389232635498047	1.72243118286133	3.15588760375977	-1.43630886077881	0.328938484191895	0.387314796447754	2.44595527648926
313	E2A6W8;XP_011252591.1		0.507619	0.485476	-0.941659	-0.322768	tr|E2A6W8|E2A6W8_CAMFO Folate gamma-glutamyl hydrolase OS=Camponotus floridanus (Florida carpenter ant) OX=104421 GN=EAG_02507 PE=4 SV=1;|XP_011252591.1 chitobiosyldiphosphodolichol beta-mannosyltransferase [Camponotus floridanus]	-2.22463130950928	-7.53044939041138	-5.66557741165161	-2.12032318115234	-1.13885116577148	-3.01560020446777	-3.42819786071777	-7.43599653244019	-3.05902004241943	-10.0678777694702	-2.91409492492676	-2.75634002685547	-0.757863998413086	-7.99900388717651	-7.71201705932617	-4.02138805389404	-1.92515754699707	-0.54095458984375	-3.13676452636719	-3.01226902008057	-3.87993621826172	0.167446136474609	-3.58607482910156	-2.18908500671387	-8.6068000793457	0.0202922821044922	-9.07046127319336	-1.42244148254395	-3.82948207855225	-3.24691581726074	-2.19979286193848	-1.01724815368652	-2.55000686645508	0.16814136505127	-2.49928379058838	-0.505578994750977	-1.65554618835449	-0.548364639282227	1.385422706604	0.239556312561035	-9.14838027954102	-2.13637733459473
333	XP_011253127.1;XP_011253125.1;E2A7Y1;XP_025266675.1;XP_011253124.1		0.782022	0.286473	1.4199	0.472537	tr|E2A7Y1|E2A7Y1_CAMFO Alpha-galactosidase OS=Camponotus floridanus (Florida carpenter ant)	-0.0614614486694336	-0.659933090209961	-0.0512447357177734	-0.881830215454102	0.190839767456055	-1.94947624206543	-3.25165939331055	1.13554000854492	-4.45638370513916	-0.796867370605469	2.08046340942383	2.34030342102051	1.1077709197998	-1.00626754760742	0.111906051635742	-3.72677707672119	-5.91310596466064	1.05969619750977	-7.28361654281616	-0.408492088317871	0.444969177246094	-8.47830009460449	-1.57315254211426	-3.0462589263916	-0.816381454467773	-9.0510778427124	-1.03523826599121	2.18477821350098	-2.15509700775146	-6.66213178634644	1.87604713439941	-2.89655685424805	-1.88672256469727	-6.96683931350708	-3.48157596588135	-2.58506011962891	2.14435195922852	-5.33230352401733	-0.0875005722045898	-8.7553596496582	-1.04243183135986	1.96415710449219
342	XP_011253314.1;E2A8B3		0.40872	0.579074	0.782079	0.269633	tr|E2A8B3|E2A8B3_CAMFO Dolichyl-diphosphooligosaccharide--protein glycosyltransferase subunit 1 OS=Camponotus floridanus (Florida carpenter ant)	-0.564200401306152	-0.0391483306884766	-2.97282981872559	-0.903646469116211	-4.64041709899902	-5.34472274780273	-1.84642791748047	-8.9735107421875	-0.826279640197754	-10.9708528518677	-3.15200424194336	-4.33267593383789	-1.11815643310547	-7.90434265136719	-6.64975166320801	-5.41669750213623	-3.1734676361084	-0.81260871887207	-6.82311964035034	-0.291953086853027	0.0549564361572266	-5.15666389465332	-1.47859573364258	-1.99071884155273	-5.27763652801514	-9.13572597503662	-1.97315788269043	-1.31335830688477	-1.14050960540771	-9.69658660888672	-2.1356029510498	-4.69699668884277	-5.99956941604614	-4.77859401702881	-4.03438472747803	-2.79463768005371	-3.04793739318848	-4.06957626342773	-3.67755603790283	-8.40683364868164	-8.38832855224609	-0.90135383605957
354	XP_011253679.1;E2A8Y6		0.0338771	0.952248	0.114862	0.03576	tr|E2A8Y6|E2A8Y6_CAMFO Superoxide dismutase [Cu-Zn] OS=Camponotus floridanus (Florida carpenter ant) OX=104421 GN=EAG_07480 PE=3 SV=1	1.64729404449463	2.55483245849609	0.911388397216797	-0.775123596191406	0.546205520629883	-8.29509925842285	0.424392700195313	-8.21666812896729	0.755379676818848	3.3751049041748	4.54213523864746	5.21881675720215	3.93435478210449	-6.83844804763794	3.3727970123291	-1.84298038482666	0.46623420715332	2.92485809326172	0.598798751831055	2.86505794525146	2.51273155212402	-3.4266300201416	1.94267654418945	1.94317817687988	-6.21367788314819	-0.795520782470703	-7.32580327987671	4.09926986694336	4.36784648895264	4.43288612365723	5.10495948791504	-0.543630599975586	-2.08285331726074	-2.23433780670166	1.10376453399658	-1.77868843078613	3.5427074432373	0.502344131469727	3.64699077606201	-0.175873756408691	-9.05716609954834	3.55554008483887
371	XP_011254034.1;E2A9P3		0.380241	0.63256	0.692388	0.243474	tr|E2A9P3|E2A9P3_CAMFO Vitellogenin domain-containing protein OS=Camponotus floridanus (Florida carpenter ant) OX=104421 GN=EAG_11463 PE=4 SV=1	-4.98098850250244	-4.25537300109863	-4.70841789245605	-6.77982521057129	-2.43821334838867	-7.03513669967651	-2.03351593017578	-3.98527145385742	-0.877131462097168	-4.6771068572998	-1.81221580505371	1.55866241455078	-4.77853202819824	-3.5656681060791	-0.563863754272461	-8.85360145568848	0.685096740722656	-2.09667015075684	-0.806331634521484	-5.19213199615479	-5.03140640258789	-3.2745418548584	-9.23923683166504	-7.36423635482788	-2.90863037109375	-5.94750595092773	0.825702667236328	-5.60000610351563	-2.16381931304932	-4.92593955993652	-1.20300102233887	-5.52078437805176	-6.78646802902222	-2.29841136932373	-4.69464588165283	-8.29758548736572	-5.96830940246582	-4.17788696289063	-4.16981220245361	1.19675731658936	-2.91283702850342	-5.86099433898926
409	XP_011254633.1;E2AAT2		1.11347	0.289	1.30243	0.479186	tr|E2AAT2|E2AAT2_CAMFO Eukaryotic translation initiation factor 3 subunit B OS=Camponotus floridanus (Florida carpenter ant) OX=104421 GN=EAG_06656 PE=3 SV=1	-3.14775943756104	-0.289167404174805	-3.94363403320313	-3.25914001464844	-4.31899452209473	-7.66327285766602	-4.6479320526123	-7.78502988815308	-6.57161045074463	-3.16052055358887	-2.52055549621582	-2.13460350036621	-1.31388473510742	-3.78594207763672	-5.80625057220459	-2.92829036712646	-3.35812187194824	-1.27040863037109	-8.96468257904053	-2.13592433929443	-0.670707702636719	-3.18769836425781	-3.45216941833496	-2.89970588684082	-4.24125862121582	-4.25381851196289	-4.20872116088867	-1.83833694458008	-2.44656276702881	-3.03744506835938	-3.77251243591309	-9.35723304748535	-5.07842636108398	-9.07006931304932	-5.65459537506104	-3.70830726623535	-3.9435920715332	-8.45078754425049	-5.28381824493408	-8.25879192352295	-7.97190570831299	-1.52251434326172
412	XP_011254740.1;E2AB19		1.34608	0.22041	-1.52778	-0.557773	tr|E2AB19|E2AB19_CAMFO Ribos_L4_asso_C domain-containing protein OS=Camponotus floridanus (Florida carpenter ant) OX=104421 GN=EAG_01035 PE=4 SV=1	-2.07077693939209	-0.927648544311523	-3.16376304626465	-1.50308418273926	-3.7027645111084	-5.88326168060303	-3.02978706359863	-7.67284727096558	-6.54481363296509	-2.58665466308594	-4.58559799194336	-4.58827018737793	-1.28383636474609	-8.87644481658936	-4.39813232421875	-2.85232257843018	-2.96316719055176	-3.43939590454102	-7.21133375167847	-3.25916767120361	-1.43407440185547	-6.82837390899658	0.202123641967773	-1.65756797790527	-0.638116836547852	-2.54343223571777	-6.70585775375366	-1.17559814453125	-2.56141185760498	0.811586380004883	0.00131607055664063	-3.37596702575684	-0.451921463012695	-1.58628177642822	-3.7390775680542	-3.98019790649414	-0.792922973632813	1.22309303283691	-1.08925724029541	-7.19814443588257	-3.38616275787354	-0.600652694702148
413	XP_019882849.1;E2AB23		1.40892	0.119111	2.2067	0.727134	tr|E2AB23|E2AB23_CAMFO Aldo_ket_red domain-containing protein OS=Camponotus floridanus (Florida carpenter ant) OX=104421 GN=EAG_01039 PE=4 SV=1	-0.947815895080566	-2.27151489257813	-2.68669700622559	-1.58813858032227	-1.98280143737793	-0.780553817749023	-2.30897331237793	-9.75739669799805	-5.3918628692627	-2.99807739257813	-0.310176849365234	2.26956558227539	-0.703447341918945	-9.75348854064941	0.585222244262695	-2.7251443862915	-3.74161720275879	-2.54606246948242	-4.70822143554688	-1.49179363250732	-0.789627075195313	-1.72556686401367	-1.53733825683594	-1.6004524230957	-7.71208333969116	-8.63594436645508	-8.59776210784912	1.73581695556641	-2.54993152618408	-6.00100660324097	0.39936637878418	-10.2243432998657	-8.0010404586792	-9.83249473571777	-3.0437650680542	-6.19458627700806	-2.39817428588867	-1.9430103302002	1.88016605377197	-8.30572605133057	-8.87717151641846	-1.0977897644043
428	E2ABN0;XP_011255042.2;XP_011255044.1;XP_011255043.1		0.615816	0.425043	1.11303	0.378841	tr|E2ABN0|E2ABN0_CAMFO Apolipoprotein D OS=Camponotus floridanus (Florida carpenter ant) OX=104421 GN=EAG_14390 PE=3 SV=1;|XP_011255042.2 apolipoprotein D-like [Camponotus floridanus]	-7.62526655197144	-3.07906913757324	2.73658180236816	-5.24139022827148	-5.5894775390625	-3.41211318969727	-2.02572250366211	-2.78861808776855	-4.89174747467041	-1.78564643859863	-2.12025260925293	2.21463012695313	-5.46242332458496	-2.3208179473877	0.222499847412109	-9.87582778930664	-1.60613822937012	-1.14542579650879	-4.14005851745605	-3.679123878479	-5.82717895507813	-5.05837821960449	0.974822998046875	-3.38663101196289	-3.04129981994629	-0.905767440795898	-0.768896102905273	-3.47232627868652	-3.38926100730896	-2.65765571594238	-3.45162391662598	-10.2495002746582	-3.96927642822266	-10.84326171875	-6.90679836273193	-3.1495361328125	-4.96451568603516	-5.24614334106445	-3.77710437774658	-0.701849937438965	-9.49197006225586	-4.97521638870239
432	XP_011255085.1;E2ABQ6		0.0134454	0.972678	-0.0293005	-0.0106083	tr|E2ABQ6|E2ABQ6_CAMFO Glyceraldehyde-3-phosphate dehydrogenase OS=Camponotus floridanus (Florida carpenter ant) OX=104421 GN=EAG_14416 PE=3 SV=1	0.0980138778686523	-0.795768737792969	-2.0941104888916	-0.542400360107422	0.0281047821044922	-4.55443048477173	-0.763326644897461	-3.53108787536621	-2.69941806793213	0.0731010437011719	-0.655794143676758	2.31164932250977	-0.116765975952148	-8.39212894439697	0.0279865264892578	-3.03567790985107	-4.91979694366455	-1.14587783813477	-2.69450569152832	-2.81704044342041	-0.577531814575195	0.175832748413086	-0.809383392333984	-0.385101318359375	-0.166568756103516	-1.92101860046387	-1.73386383056641	2.85892677307129	-0.835709571838379	0	0.219070434570313	-9.03804206848145	-2.39797401428223	-1.48671817779541	-2.85092258453369	-5.35732078552246	-0.425498962402344	-0.782470703125	1.95473194122314	-2.39790821075439	-6.32180023193359	-0.689399719238281
436	E2ABW9;XP_011255166.1		0.106939	0.906384	-0.21962	-0.0787873	tr|E2ABW9|E2ABW9_CAMFO ATP synthase subunit beta OS=Camponotus floridanus (Florida carpenter ant) OX=104421 GN=EAG_02827 PE=3 SV=1;|XP_011255166.1 ATP synthase subunit beta, mitochondrial [Camponotus floridanus]	-0.345065116882324	-2.76418113708496	-1.03509140014648	0.200166702270508	-2.76555633544922	0.569204330444336	0.395946502685547	0.210172653198242	-3.43093204498291	-4.51711463928223	-1.48648071289063	-5.2429313659668	-2.51919937133789	-8.26723957061768	-4.65064430236816	-0.0672540664672852	-2.96296501159668	-3.37286567687988	-2.78485488891602	-0.22481632232666	-1.14682197570801	-3.95852470397949	-1.07266616821289	0.562149047851563	0.127777099609375	-0.939144134521484	-1.28013610839844	-0.958225250244141	-0.366366386413574	-8.9222469329834	-1.40496444702148	-2.45227432250977	-7.48671340942383	-3.73862171173096	0.458508491516113	-3.5030517578125	-1.40814018249512	0.235734939575195	-0.779204368591309	-8.28495216369629	0.219599723815918	0.0987701416015625
443	XP_011255282.1;E2AC27		1.82453	0.245488	-1.33963	-0.53003	tr|E2AC27|E2AC27_CAMFO GMC_OxRdtase_N domain-containing protein OS=Camponotus floridanus (Florida carpenter ant) OX=104421 GN=EAG_13495 PE=4 SV=1	7.58146572113037	8.70147895812988	7.60084915161133	5.79289817810059	8.83517265319824	7.25699234008789	9.70583152770996	5.30835914611816	10.1393251419067	10.2435836791992	8.36823463439941	5.70298385620117	7.81447601318359	10.0646553039551	4.57861137390137	10.2534704208374	10.9591960906982	9.65738105773926	7.23848724365234	8.99906063079834	8.52072906494141	10.1829566955566	9.76215553283691	9.41450119018555	11.5213680267334	10.6777420043945	11.0054893493652	6.489501953125	9.58058643341064	11.2656688690186	7.53761863708496	11.0461235046387	10.7086906433105	11.0727586746216	9.05984401702881	10.6538066864014	8.33929252624512	10.0870056152344	6.14485454559326	11.0535154342651	10.4375486373901	7.86119079589844
444	XP_011255300.1;E2AC60		0.124244	0.901622	-0.201011	-0.0764374	tr|E2AC60|E2AC60_CAMFO Beta-hexosaminidase OS=Camponotus floridanus (Florida carpenter ant) OX=104421 GN=EAG_07587 PE=3 SV=1	0.174551963806152	2.014892578125	3.88611602783203	1.34706878662109	1.61483192443848	-0.816642761230469	3.42718887329102	-9.11102390289307	3.18612957000732	3.52849960327148	3.96839904785156	3.08779907226563	2.73147201538086	2.19239234924316	3.4662971496582	3.20204448699951	1.20964050292969	2.94941902160645	0.388402938842773	3.29982089996338	2.39749908447266	1.91085052490234	2.2293586730957	2.20713806152344	1.88982009887695	1.81071281433105	2.47897148132324	1.12389755249023	2.99483013153076	1.83878135681152	0.228408813476563	0.781869888305664	3.32215118408203	1.50210285186768	2.43083477020264	3.82064628601074	1.80815315246582	3.08236885070801	2.24215602874756	2.51954746246338	2.05379581451416	1.24069023132324
449	XP_011255385.1;E2ACC1		0.655636	0.3782	1.26284	0.418702	tr|E2ACC1|E2ACC1_CAMFO Uricase OS=Camponotus floridanus (Florida carpenter ant) OX=104421 GN=EAG_03488 PE=3 SV=1	2.56494998931885	2.82762336730957	-0.992622375488281	1.0219669342041	0.0315227508544922	-3.36091804504395	0.971744537353516	-7.80772972106934	-0.327557563781738	-3.46049880981445	-1.73547744750977	2.00692558288574	3.52237319946289	-7.55913591384888	0.578350067138672	-0.578890800476074	-2.68063163757324	1.42485618591309	-0.250698089599609	2.20167255401611	1.09875679016113	-7.54339456558228	1.15211486816406	1.46188545227051	-2.19429588317871	-6.39216041564941	-2.9392261505127	2.25333213806152	-2.40469455718994	-2.16861724853516	1.55934143066406	-10.0523366928101	-5.62576150894165	-6.83634328842163	0.890490531921387	1.66833877563477	0.213769912719727	-1.12881278991699	-2.37049198150635	-2.49305820465088	-2.89088726043701	2.32311820983887
456	XP_011255648.1;E2ACR5		0.167406	0.821522	-0.35932	-0.125402	tr|E2ACR5|E2ACR5_CAMFO Annexin OS=Camponotus floridanus (Florida carpenter ant) OX=104421 GN=EAG_15889 PE=3 SV=1	-1.73262500762939	-2.01508140563965	-2.3669490814209	-2.21402931213379	-1.58837127685547	-2.69363021850586	-3.46942329406738	-1.49318313598633	-9.64783573150635	-1.52864265441895	-3.4698543548584	-1.60462951660156	-0.527202606201172	-9.77681827545166	-2.90411567687988	-2.97938823699951	-1.3892993927002	-3.90466499328613	-6.25027656555176	-1.91833972930908	-1.26883888244629	-2.65709686279297	-3.5531120300293	2.98370552062988	0.211605072021484	1.03279304504395	-5.34683322906494	-0.316341400146484	-1.22462749481201	-9.60286235809326	-0.325189590454102	-9.57656002044678	-6.30418014526367	-2.70653247833252	-4.37421321868896	-0.386165618896484	-2.23809814453125	-2.80763626098633	-2.85764217376709	-3.95919895172119	-3.58682346343994	-0.016998291015625
481	XP_011256104.1;E2ADN0		0.703923	0.344632	-1.32591	-0.440107	tr|E2ADN0|E2ADN0_CAMFO Malate dehydrogenase OS=Camponotus floridanus (Florida carpenter ant) OX=104421 GN=EAG_10365 PE=3 SV=1	0.127572059631348	-1.47916984558105	-1.9406566619873	-1.61384773254395	-4.66552925109863	-1.01809120178223	-6.49423837661743	-8.30794143676758	-8.85372352600098	-2.340087890625	-0.165454864501953	3.09297943115234	1.17445945739746	-8.45905303955078	-3.43978500366211	-3.71421146392822	-3.08278179168701	-2.73562812805176	-6.73621082305908	-0.790287971496582	-2.36834526062012	-7.43768358230591	-4.65461158752441	0.52348518371582	-0.668861389160156	-2.93264389038086	-3.15472984313965	2.91066741943359	1.58530902862549	-1.42408752441406	1.5609188079834	-2.35998916625977	-5.33307218551636	-7.77527141571045	-1.43457126617432	-5.17764091491699	1.64105224609375	-2.2762279510498	0.854996681213379	-1.61468982696533	-8.55444812774658	1.46043014526367
487	XP_011256209.1;E2ADT4		0.0779726	0.932564	0.137143	0.051618	tr|E2ADT4|E2ADT4_CAMFO Aamy domain-containing protein OS=Camponotus floridanus (Florida carpenter ant) OX=104421 GN=EAG_10419 PE=4 SV=1	-2.74911594390869	-3.27708053588867	-3.30052185058594	-3.36323356628418	-3.38802719116211	-3.82212257385254	-3.53533744812012	-6.41274452209473	-8.46347332000732	-1.11735343933105	-1.39425849914551	-2.43946266174316	-2.93165397644043	-6.8609471321106	-0.169816970825195	-3.36182689666748	-2.80318737030029	-4.45566749572754	-5.92965221405029	-3.81814098358154	-1.39896965026855	-1.9326171875	-5.56587600708008	-1.79103660583496	-1.46175384521484	-1.36408424377441	-2.65773773193359	-3.98308372497559	-4.25860691070557	-2.81391906738281	-4.88142585754395	-9.26542472839355	-2.27938842773438	-2.24595737457275	-5.03201389312744	-1.87782669067383	-5.16058731079102	-4.19598960876465	0.143635749816895	-3.61706638336182	-3.66088962554932	-5.35592842102051
499	XP_011256478.1;E2AE51		0.506001	0.805212	-0.308769	-0.134156	tr|E2AE51|E2AE51_CAMFO Cathepsin L OS=Camponotus floridanus (Florida carpenter ant) OX=104421 GN=EAG_13195 PE=3 SV=1	0.239489555358887	1.0367431640625	0.812383651733398	-0.667030334472656	0.108514785766602	-0.482534408569336	-0.291357040405273	-2.30030250549316	-0.316628456115723	1.07135391235352	1.37105178833008	0.935665130615234	2.20098686218262	-1.64855766296387	0.0646896362304688	-0.0541677474975586	0.812541961669922	0.416757583618164	-0.238796234130859	1.53203296661377	-0.151262283325195	1.80799674987793	-0.44828987121582	0.844392776489258	1.89166641235352	0.435319900512695	2.10971069335938	-1.28356552124023	1.2385950088501	1.30075454711914	-0.318115234375	-0.0701637268066406	1.16229820251465	0.143786430358887	0.815583229064941	2.13826560974121	-0.143087387084961	0.479707717895508	-0.560311317443848	0.0455026626586914	0.17002010345459	0.553848266601563
521	XP_019883183.1;E2AEN9;XP_011256790.1		0.994561	0.286642	-1.33662	-0.477826	tr|E2AEN9|E2AEN9_CAMFO Cuticlin-1 OS=Camponotus floridanus (Florida carpenter ant) OX=104421 GN=EAG_10698 PE=4 SV=1;|XP_011256790.1 uncharacterized protein LOC105251573 i	-4.87376308441162	-2.70335388183594	-2.00260543823242	-6.12473154067993	0.0429325103759766	-0.932296752929688	1.43645477294922	-8.80718040466309	0.935208320617676	1.05777740478516	-1.00198364257813	-1.56874847412109	-3.91173410415649	0	-3.22301292419434	0.0541677474975586	-1.12220764160156	0.305074691772461	-0.528812408447266	-0.774882316589355	-0.639408111572266	1.9508228302002	0	-6.31002950668335	2.35055541992188	1.84677505493164	1.51549911499023	-3.43988418579102	-1.11098384857178	2.74091911315918	-2.83585739135742	1.96457290649414	3.90184783935547	2.15237522125244	-0.207528114318848	1.38598251342773	-2.11397552490234	-0.772781372070313	-4.30849742889404	1.475998878479	1.0422830581665	-1.22264671325684
532	E2AFL0;XP_011257234.1;XP_011257235.1		0.048556	0.943465	0.141761	0.0463341	tr|E2AFL0|E2AFL0_CAMFO Transaldolase OS=Camponotus floridanus (Florida carpenter ant) OX=104421 GN=EAG_02708 PE=3 SV=1;|XP_011257235.1 transaldolase isoform X2 [Camponotus floridanus]	0.383671760559082	0.247613906860352	-3.65430450439453	-0.0764045715332031	-0.902561187744141	-0.961483001708984	4.10093879699707	-8.0131893157959	-8.24114227294922	1.34443473815918	1.67909622192383	3.69334602355957	1.37355041503906	-7.53441476821899	1.16562271118164	-1.92936229705811	-7.4353175163269	-2.7750186920166	-0.286836624145508	-0.552660942077637	0.0220069885253906	-3.17721939086914	-2.32356452941895	2.08189964294434	-7.82032299041748	-1.1466121673584	-8.9249849319458	1.52897262573242	-0.518651008605957	-3.79280853271484	0.577455520629883	-1.94391059875488	-0.942415237426758	-1.94650554656982	-1.50359439849854	2.32233428955078	0.115301132202148	-2.55740928649902	1.67855930328369	-8.83922481536865	-1.17100811004639	0.623332977294922
536	XP_011257276.1;E2AFM8		0.0373141	0.950528	-0.0952425	-0.0326653	tr|E2AFM8|E2AFM8_CAMFO 40S ribosomal protein SA OS=Camponotus floridanus (Florida carpenter ant) OX=104421 GN=EAG_02726 PE=3 SV=1	-0.417315483093262	0	-1.68131637573242	0.521329879760742	0.851551055908203	-5.80194568634033	-0.872854232788086	0.536100387573242	-9.1627779006958	-0.112680435180664	-3.57255744934082	-2.46112823486328	-0.371545791625977	-3.38154792785645	-1.44830131530762	0.0623579025268555	-7.84826040267944	-0.90412712097168	-8.92582035064697	-2.60598850250244	0.189151763916016	-4.74256229400635	-2.24476432800293	-0.758190155029297	-2.14224815368652	-8.06287574768066	-9.6922779083252	-0.714799880981445	-1.55205821990967	1.09005355834961	-0.762340545654297	-0.798873901367188	-0.791746139526367	-7.29394149780273	-4.57565021514893	-2.88553428649902	-0.0735683441162109	0.534486770629883	-1.77719783782959	0.115921974182129	-3.06250476837158	-1.27754402160645
537	XP_011257343.1;XP_011257342.1;E2AFQ5		0.66911	0.563787	0.708014	0.276436	tr|E2AFQ5|E2AFQ5_CAMFO Actin-5C OS=Camponotus floridanus (Florida carpenter ant) OX=104421 GN=EAG_04690 PE=3 SV=1	0.159548759460449	0.618345260620117	-0.199438095092773	0.577280044555664	-0.550945281982422	1.83809089660645	0.196414947509766	0.380012512207031	-1.03878879547119	-0.692733764648438	-1.12272262573242	-1.30867958068848	-0.554712295532227	-1.03436279296875	-0.0279865264892578	-0.917925834655762	-0.668014526367188	-1.08189582824707	-0.00214767456054688	-0.448672294616699	-0.488237380981445	-3.03408050537109	-0.131824493408203	-0.812219619750977	0.363882064819336	-0.911144256591797	0.0221824645996094	-0.657241821289063	0.102009773254395	-0.138805389404297	-0.708993911743164	-7.83531856536865	-2.40567016601563	-8.20567035675049	-0.683012962341309	0.0419082641601563	-1.22204780578613	-1.17875480651855	1.55947017669678	-0.652714729309082	0.431347846984863	-0.496393203735352
549	E2AGG0;XP_011257663.3		1.62501	0.193867	1.64708	0.609775	tr|E2AGG0|E2AGG0_CAMFO Phospholipase B1, membrane-associated OS=Camponotus floridanus (Florida carpenter ant) OX=104421 GN=EAG_02880 PE=4 SV=1;|XP_011257663.3 phospholipase B1, membrane-associated [Camponotus floridanus]	-0.83419132232666	-0.0715980529785156	2.79562759399414	4.67350196838379	2.38313865661621	5.57553672790527	1.66030883789063	4.16585540771484	2.24008464813232	0.705013275146484	-0.0968894958496094	-2.61140823364258	-1.26677131652832	1.40348434448242	2.97346687316895	1.80724811553955	2.75547027587891	-1.7984733581543	2.92319488525391	-1.02919101715088	1.40026092529297	4.55615043640137	2.47281837463379	0.686742782592773	3.56681442260742	-7.94534778594971	1.54282188415527	-1.32673263549805	-0.477025032043457	0.940261840820313	-0.189315795898438	0.171625137329102	0.971935272216797	-0.878342628479004	0.000266075134277344	-0.580635070800781	1.11823272705078	1.32362174987793	-2.36561107635498	-1.24044132232666	1.51944637298584	-1.2830753326416
555	XP_011257750.1;E2AGM0;E2A8L3;XP_011253498.1		0.417336	0.535522	0.863486	0.289936	tr|E2AGM0|E2AGM0_CAMFO Tubulin alpha chain OS=Camponotus floridanus (Florida carpenter ant) OX=104421 GN=EAG_05971 PE=3 SV=1	-0.136763572692871	1.01611137390137	0.182868957519531	0.909265518188477	-0.594646453857422	-8.16144371032715	1.05292701721191	-6.6641149520874	-1.28635883331299	-2.54321670532227	-4.38946533203125	-0.904020309448242	-0.211177825927734	-9.06197452545166	1.01878356933594	0.0856504440307617	-10.2469654083252	-1.18085861206055	-1.84363746643066	-0.888638496398926	0.737316131591797	-3.18619728088379	-1.72698783874512	0	-0.570463180541992	-7.86994886398315	-0.352890014648438	-0.885856628417969	-0.37366771697998	-1.74711227416992	-1.88535499572754	-8.89793109893799	-3.65506172180176	-8.09770011901855	-7.78709411621094	-1.96663093566895	-1.71522903442383	-1.87084197998047	-1.78085422515869	-5.84085988998413	-2.69914722442627	-0.380853652954102
559	XP_011257803.1;E2AGQ1		0.553372	0.488884	0.895563	0.317865	tr|E2AGQ1|E2AGQ1_CAMFO Plug_translocon domain-containing protein OS=Camponotus floridanus (Florida carpenter ant) OX=104421 GN=EAG_00891 PE=3 SV=1	0.0802831649780273	1.35293769836426	0.138385772705078	0.125602722167969	-1.5276050567627	-7.12312316894531	-2.1765308380127	-0.739053726196289	-2.31579113006592	-0.226430892944336	-1.52544975280762	-5.09723854064941	-0.731668472290039	-0.287038803100586	-1.7393913269043	0.168536186218262	-0.941444396972656	1.14286041259766	-2.42924690246582	0.252608299255371	1.47551345825195	-7.75279474258423	-0.0204563140869141	-0.263116836547852	-7.18175840377808	-2.55362319946289	0	-0.360645294189453	-1.23809719085693	-9.71327209472656	0.110031127929688	-1.55344009399414	-1.7040843963623	-1.44500064849854	-8.65388774871826	-2.1523380279541	-2.04800987243652	-0.0209846496582031	-3.68753910064697	-1.14555072784424	0.00707721710205078	-0.129682540893555
597	E2AIX5;XP_025263124.1		0.365713	0.667857	-0.572961	-0.210639	tr|E2AIX5|E2AIX5_CAMFO Maltase 1 OS=Camponotus floridanus (Florida carpenter ant) OX=104421 GN=EAG_01963 PE=4 SV=1	5.60401630401611	4.74387550354004	4.5322093963623	-0.812498092651367	6.19103813171387	3.36944580078125	7.4119758605957	0.565242767333984	7.31899547576904	7.41366958618164	5.99735069274902	2.18960571289063	4.16366386413574	7.28622055053711	0.136049270629883	6.39777088165283	6.00779151916504	6.41953277587891	6.05410766601563	6.70258808135986	4.80451011657715	5.55470657348633	5.88567733764648	5.17908477783203	8.12654876708984	8.08303642272949	3.8461971282959	1.47462844848633	7.02890682220459	7.04208564758301	0.0992183685302734	8.09609413146973	5.85514068603516	7.86612224578857	5.13654232025146	5.7544994354248	5.62635231018066	6.16645240783691	2.39669513702393	4.26999950408936	7.48673534393311	3.38000679016113
598	E2AIZ4;XP_025262148.1;XP_025262147.1;XP_025262146.1;XP_025262145.1;XP_025262144.1;XP_011258911.1;XP_011258910.1		0.246207	0.751446	0.415832	0.152822	tr|E2AIZ4|E2AIZ4_CAMFO Sodium/potassium-transporting ATPase subunit alpha OS=Camponotus floridanus (Florida carpenter ant) OX=104421 GN=EAG_15581 PE=3 SV=1;|XP_025262148.1 sodium/potassium-transporting ATPase subunit alpha isoform X7 [Camponotus floridanus]	-2.7266092300415	-0.940410614013672	-0.937763214111328	-2.14520072937012	-6.71188259124756	-7.18323564529419	-2.94441413879395	-6.85595941543579	-5.7105827331543	-8.29085159301758	-4.54361534118652	-5.81571960449219	-2.55765342712402	-3.3641471862793	-5.6379508972168	-2.22348117828369	-1.61375999450684	-3.09096717834473	-3.49755096435547	-3.62765979766846	-2.21718215942383	-4.55038070678711	-1.96831703186035	-2.09602928161621	-3.65729904174805	-5.68245840072632	-2.56406402587891	-4.12175750732422	-3.57438373565674	-3.33342742919922	-4.54867744445801	-9.9373025894165	-4.8658618927002	-9.74249076843262	-7.01414966583252	-1.7248363494873	-3.58022117614746	-2.08200454711914	-8.1449613571167	-4.22839069366455	-1.52214527130127	-2.49307250976563
599	XP_011258918.1;E2AIZ6		0.318514	0.639794	-0.757435	-0.247264	tr|E2AIZ6|E2AIZ6_CAMFO ML domain-containing protein OS=Camponotus floridanus (Florida carpenter ant) OX=104421 GN=EAG_15583 PE=4 SV=1	4.24650096893311	3.68840789794922	5.06134796142578	4.11596298217773	5.2424488067627	3.15742301940918	4.08993721008301	-7.12159109115601	3.51454448699951	2.52971267700195	1.88607597351074	1.33888626098633	5.14168357849121	-4.08547973632813	0.249523162841797	3.83354663848877	-7.90808296203613	5.32214736938477	1.93077278137207	3.92046070098877	5.67198753356934	-0.595544815063477	4.02713203430176	4.24242210388184	2.29665184020996	3.30765533447266	5.52994728088379	3.49276542663574	0.97911548614502	-0.166505813598633	4.42171669006348	3.47716331481934	2.92824172973633	-8.90628719329834	3.91314220428467	4.59546089172363	4.66025543212891	2.99169731140137	3.03048801422119	3.72604846954346	3.86310863494873	5.49900054931641
608	E2AJ75;XP_011259035.1;XP_011259034.1;XP_011259042.1		0.262311	0.817203	-0.326112	-0.128569	tr|E2AJ75|E2AJ75_CAMFO Pyruvate kinase OS=Camponotus floridanus (Florida carpenter ant) OX=104421 GN=EAG_11009 PE=3 SV=1;|XP_011259034.1 pyruvate kinase-like isoform X1 [Camponotus flori	-3.81429004669189	-2.34369087219238	-2.06696128845215	-2.32537460327148	-3.11575126647949	-2.41073608398438	-3.69660377502441	-1.75076675415039	-7.16425037384033	-3.05155563354492	-3.62673759460449	-4.22336769104004	-3.81249809265137	-2.31924247741699	-1.17607688903809	-3.85776615142822	-2.92060661315918	-2.44834136962891	-5.72137355804443	-3.48429393768311	-1.25701713562012	-5.43955612182617	-3.15462112426758	-4.03158950805664	-0.826044082641602	-2.05475997924805	-0.269069671630859	-0.76116943359375	-3.43500423431396	-1.35185241699219	-2.58270263671875	-1.41682815551758	-6.29727554321289	-7.34273052215576	-4.74260807037354	-1.78092384338379	-4.33312797546387	-3.04330635070801	-2.88642978668213	-0.222659111022949	-1.25343608856201	-4.30697631835938
615	E2AJL8		0.760244	0.419143	-1.0428	-0.378763	tr|E2AJL8|E2AJL8_CAMFO Carboxylic ester hydrolase OS=Camponotus floridanus (Florida carpenter ant) OX=104421 GN=EAG_07771 PE=3 SV=1	0.728987693786621	2.62777900695801	3.81027221679688	-7.34207534790039	2.01972579956055	3.41581344604492	3.57372283935547	4.7763500213623	3.57296085357666	3.83232688903809	1.40717887878418	-2.56100082397461	-0.655656814575195	3.59767150878906	2.91176223754883	2.01246166229248	3.74450302124023	4.04393768310547	2.91843795776367	2.35338306427002	2.83992767333984	4.3137092590332	4.87729835510254	-0.216958999633789	5.14169311523438	3.77117729187012	5.48001861572266	1.04714393615723	4.48127460479736	6.71030616760254	1.46775054931641	5.45074272155762	5.38345718383789	4.07349491119385	3.12517833709717	4.11132621765137	-0.647775650024414	2.28582763671875	1.21072864532471	4.19552707672119	4.90105152130127	0.435159683227539
628	XP_011259459.2;E2AJX6		0.95303	0.412952	-1.05326	-0.397847	tr|E2AJX6|E2AJX6_CAMFO Catalase OS=Camponotus floridanus (Florida carpenter ant) OX=104421 GN=EAG_13772 PE=3 SV=1	-0.238516807556152	-1.29074478149414	-1.84839820861816	-1.61224555969238	-0.0979557037353516	-1.03129196166992	-2.8226146697998	-5.43227434158325	-3.05806827545166	-3.01475715637207	-4.04134750366211	-3.98801422119141	-3.43768882751465	-8.91956329345703	-0.354118347167969	-1.21312618255615	-7.46560049057007	-1.03514862060547	-4.29720115661621	-5.71095323562622	-1.47886276245117	-5.20293664932251	0.757966995239258	-1.69830513000488	-1.79001426696777	-3.16647148132324	-3.63467407226563	0.130979537963867	-2.9115629196167	-1.41201400756836	-1.8051586151123	-2.5207576751709	-4.46920394897461	-1.93942546844482	-3.4751672744751	-3.11235809326172	-2.2491283416748	-2.95379447937012	2.74686717987061	-0.367291450500488	-0.717267036437988	-1.42733001708984
632	E2AK03;XP_025267872.1		0.985811	0.240818	1.5525	0.529533	tr|E2AK03|E2AK03_CAMFO Protein CREG1 OS=Camponotus floridanus (Florida carpenter ant) OX=104421 GN=EAG_05018 PE=4 SV=1;|XP_025267872.1 protein CREG1 [Camponotus floridanus]	3.0847692489624	-0.715620040893555	1.94168853759766	-0.978481292724609	3.15950012207031	-0.100702285766602	-1.8699836730957	-6.81857490539551	-0.361804008483887	3.84045028686523	2.53115272521973	1.90049743652344	1.93793678283691	1.81229972839355	-3.70365142822266	0.523371696472168	-3.04286670684814	2.82414817810059	3.4012451171875	1.19176006317139	2.20398139953613	2.91304016113281	2.43263626098633	1.58693313598633	-4.55374240875244	4.30266189575195	-7.36989784240723	-1.23302841186523	2.3591833114624	1.1180248260498	-8.26403903961182	1.5101318359375	-1.24645233154297	-0.199687004089355	-0.76616382598877	-0.576078414916992	-0.164756774902344	-5.62170219421387	-0.985527992248535	-0.612896919250488	2.69146633148193	-1.39898681640625
633	E2AK04;XP_011259541.1		0.758326	0.676035	-0.475993	-0.203032	tr|E2AK04|E2AK04_CAMFO Protein CREG1 OS=Camponotus floridanus (Florida carpenter ant) OX=104421 GN=EAG_05019 PE=4 SV=1;|XP_011259541.1 protein CREG1-like [Camponotus floridanus]	1.36780261993408	-0.129110336303711	1.42962074279785	-0.732816696166992	1.70034027099609	-1.07406234741211	-2.11675643920898	-0.973855972290039	0.0801820755004883	-1.09575843811035	0.649791717529297	-0.570852279663086	1.37080001831055	0.202669143676758	0.214427947998047	-0.120602607727051	0.334095001220703	0.572198867797852	-0.948688507080078	0.80809497833252	1.36518859863281	-2.68680953979492	0.70994758605957	-0.55780029296875	-0.908945083618164	-2.06958198547363	1.96329116821289	0.229808807373047	0.154215812683105	-0.103000640869141	0.94355583190918	1.97043037414551	-0.422510147094727	1.58101749420166	1.83948993682861	0.814186096191406	0.871105194091797	0.771711349487305	1.31616878509521	-0.993645668029785	0.883730888366699	0.273580551147461
641	XP_011259751.1;E2AKD6		0.37736	0.503264	-1.00418	-0.310783	tr|E2AKD6|E2AKD6_CAMFO V-type proton ATPase proteolipid subunit OS=Camponotus floridanus (Florida carpenter ant) OX=104421 GN=EAG_15368 PE=3 SV=1	3.13212299346924	4.37647247314453	2.55436134338379	2.92222023010254	2.28075408935547	0.395181655883789	2.48539161682129	-8.40181922912598	0.00931453704833984	2.25503921508789	3.38178825378418	2.23397636413574	2.0399112701416	-8.22855949401855	-0.483247756958008	3.28146839141846	-7.66128826141357	3.80404472351074	-6.64306211471558	2.33691692352295	2.96679306030273	1.05901718139648	6.50021553039551	3.43528747558594	-0.204797744750977	1.02162742614746	-7.89576435089111	2.00364303588867	-9.36296272277832	2.60280799865723	2.99599456787109	3.79444694519043	2.73177337646484	5.5176477432251	2.86997127532959	1.99218559265137	1.99057579040527	3.68059921264648	4.69430828094482	1.86502933502197	2.62741184234619	4.58176612854004
642	XP_025266940.1;XP_019883729.1;E2AKF6		0.893395	0.286222	1.36905	0.475222	tr|E2AKF6|E2AKF6_CAMFO DOMON domain-containing protein CG14681 OS=Camponotus floridanus (Flori	-1.95135593414307	-3.18783187866211	0.627670288085938	-0.821033477783203	-7.31155300140381	-3.71162223815918	-4.42947006225586	-11.5673723220825	-3.129075050354	-3.69205474853516	-0.409406661987305	0.493524551391602	-1.64131164550781	-8.34462451934814	0.0692787170410156	-5.96658420562744	-1.56238174438477	-2.092041015625	-4.43854331970215	-1.99911975860596	-1.3555736541748	0.938255310058594	-5.16016387939453	-0.622674942016602	-3.98909950256348	-2.45895385742188	-7.85827302932739	-3.83382606506348	-6.80531597137451	-4.78779411315918	-4.29348945617676	-9.99663543701172	-4.00445938110352	-6.61077928543091	-3.16591548919678	-0.368984222412109	-3.72478675842285	-5.72044897079468	-6.76697254180908	-2.91493511199951	0.361645698547363	-4.25211715698242
648	XP_011259986.1;E2AKV6		0.601896	0.522681	0.792336	0.295741	tr|E2AKV6|E2AKV6_CAMFO Heat shock 70 kDa protein cognate 4 OS=Camponotus floridanus (Florida carpenter ant) OX=104421 GN=EAG_08137 PE=3 SV=1	0.711276054382324	0.0906581878662109	-1.42029190063477	0.407693862915039	0.840423583984375	-5.67725944519043	-0.212203979492188	-3.84452247619629	-2.66663646697998	-3.29243659973145	-1.13507080078125	-0.795373916625977	-0.714330673217773	-1.63634300231934	-0.338813781738281	-1.16649341583252	-1.26570892333984	-1.85226440429688	-1.5262565612793	-0.735312461853027	0.598514556884766	-1.76410484313965	0.626556396484375	-0.665746688842773	-7.06727075576782	-4.2066764831543	-1.07733154296875	0.895839691162109	-0.533230781555176	0.304655075073242	-1.14770126342773	-7.73779058456421	-7.57761287689209	-1.20647525787354	-3.26703548431396	-1.9577522277832	-1.27855110168457	-0.639003753662109	1.79099178314209	1.19295406341553	-3.08261966705322	-0.530336380004883
650	XP_011260079.2;E2AL14		0.265108	0.68193	0.607088	0.20304	tr|E2AL14|E2AL14_CAMFO Plasminogen activator inhibitor 1 OS=Camponotus floridanus (Florida carpenter ant) OX=104421 GN=EAG_06984 PE=3 SV=1	-3.60658359527588	-1.49874305725098	1.75370025634766	-2.01981925964355	-2.79262733459473	-8.12279033660889	-0.472383499145508	-8.10555362701416	-3.76177310943604	1.91754531860352	3.33598136901855	3.78298568725586	0.832647323608398	-3.0064754486084	2.50324821472168	-3.87506008148193	-6.60649347305298	-2.98025131225586	-8.99921894073486	0.55428409576416	-2.04971694946289	-4.47276496887207	-0.0229721069335938	-0.271272659301758	-0.427028656005859	-0.522068023681641	-2.96347999572754	-1.80268478393555	1.3359956741333	-5.26913833618164	-3.25107002258301	-3.76338195800781	-2.30721664428711	-6.34559154510498	-2.90300846099854	-1.30862236022949	-0.461812973022461	-9.92454051971436	-1.41162395477295	-0.722104072570801	-6.31761264801025	-1.48206901550293
666	E2ALP2;XP_011260424.1		0.517702	0.664764	-0.541918	-0.215033	tr|E2ALP2|E2ALP2_CAMFO Peptidase_M28 domain-containing protein OS=Camponotus floridanus (Florida carpenter ant) OX=104421 GN=EAG_10908 PE=4 SV=1;|XP_011260424.1 carboxypeptidase Q [Camponotus floridanus]	2.18188953399658	1.46255683898926	-0.0621662139892578	-2.04196548461914	2.70633316040039	-1.93029594421387	-1.76967620849609	-0.491353988647461	0.579861640930176	-1.96173667907715	0.333806991577148	-0.521511077880859	1.6851634979248	-0.638078689575195	-3.51784515380859	-0.481188774108887	-1.61217308044434	1.93067169189453	-1.85184097290039	2.295334815979	2.05638885498047	-2.2902717590332	-0.793214797973633	-0.292552947998047	0.242038726806641	-0.857284545898438	1.32368659973145	1.72000694274902	-0.500496864318848	-2.40117263793945	1.60665702819824	0.529008865356445	-0.103231430053711	0.406790733337402	1.97889995574951	3.65153503417969	1.44737434387207	-0.772882461547852	1.81294345855713	-0.0133886337280273	-2.22442531585693	1.54704475402832
667	E2ALS8;XP_019883851.2		0.349399	0.666883	-0.588768	-0.212757	tr|E2ALS8|E2ALS8_CAMFO Aminopeptidase N OS=Camponotus floridanus (Florida carpenter ant) OX=104421 GN=EAG_10592 PE=4 SV=1;|XP_019883851.2 LOW QUALITY PROTEIN: aminopeptidase N [Camponotus floridanus]	2.79201602935791	1.29057502746582	0.00555038452148438	-0.0563240051269531	4.5020751953125	-1.4040355682373	1.67946624755859	-4.01315879821777	-0.179764747619629	-2.50982475280762	-0.262517929077148	0.960857391357422	3.4262752532959	-3.64362335205078	-5.05995178222656	-0.140877723693848	-1.48327445983887	3.0394172668457	-2.63103485107422	1.07926845550537	2.3429012298584	-3.50479698181152	3.40060806274414	1.58432006835938	-1.13577461242676	-3.82297325134277	-3.29669189453125	3.03514862060547	-1.73460483551025	-2.25746726989746	2.80955505371094	0.322868347167969	0.625015258789063	0.416199684143066	2.56592273712158	4.05974769592285	2.79457473754883	-0.249555587768555	4.07089710235596	0.776913642883301	-0.728970527648926	1.86796760559082
678	XP_011260763.1;E2AMD6;XP_011260762.1		0.0213141	0.958643	-0.0628817	-0.0206808	tr|E2AMD6|E2AMD6_CAMFO Malic enzyme OS=Camponotus floridanus (Florida carpenter ant) OX=104421 GN=EAG_04942 PE=3 SV=1;|XP_011260762.1 NADP-dependent malic enzyme isoform X1 [Campo	-5.14677143096924	-4.56390380859375	-0.49140739440918	-3.0464916229248	-7.24927663803101	-1.5382080078125	-4.36505317687988	1.57939910888672	-9.24196243286133	-1.01860237121582	-6.89735984802246	0.956703186035156	-5.99062347412109	1.95974922180176	-5.42211675643921	-1.6097993850708	-2.35052680969238	-8.37558937072754	-5.9944314956665	-6.11264848709106	-1.36381721496582	0.702507019042969	-4.45216941833496	-6.26944541931152	-0.417568206787109	-1.03954887390137	-1.59402465820313	-0.940164566040039	-3.43319225311279	-1.95905876159668	-9.46104526519775	-2.84889030456543	-1.40966606140137	0.708529472351074	-5.67484951019287	-2.19438743591309	-5.3584156036377	-0.408222198486328	1.29473400115967	-0.251894950866699	-9.55690479278564	-7.42270088195801
690	XP_011260972.1;E2AMV4		0.945968	0.289647	1.3716	0.481685	tr|E2AMV4|E2AMV4_CAMFO HATPase_c domain-containing protein OS=Camponotus floridanus (Florida carpenter ant) OX=104421 GN=EAG_01853 PE=3 SV=1	-0.110514640808105	-0.073944091796875	-2.35800361633301	0.489336013793945	-2.97261810302734	-8.90427494049072	-2.46607780456543	-3.78474044799805	-6.64419555664063	-4.30275535583496	-6.14047050476074	-7.84074783325195	-1.5219783782959	-5.14149856567383	-3.25581359863281	-6.16587734222412	-2.11312866210938	0.0227928161621094	-7.10349369049072	-1.13688564300537	0.323793411254883	-4.84100532531738	-0.503244400024414	-0.692619323730469	-4.32556009292603	-7.22791910171509	-2.84795951843262	-1.73538398742676	-2.22172260284424	-8.24244785308838	-2.45534706115723	-7.72328567504883	-5.80856895446777	-4.82133197784424	-7.11714553833008	-8.16975402832031	-4.16404342651367	-7.67950105667114	-2.48421001434326	-8.07641983032227	-3.3626012802124	0.00464248657226563
691	XP_011260992.1;E2AMW3		0.509785	0.466716	0.996742	0.335831	tr|E2AMW3|E2AMW3_CAMFO Cathepsin L OS=Camponotus floridanus (Florida carpenter ant) OX=104421 GN=EAG_01862 PE=3 SV=1	0.0643072128295898	0.109714508056641	-6.39076280593872	-4.99613380432129	-6.69215822219849	-7.6712327003479	0.204187393188477	-8.9285717010498	-2.86814212799072	-1.95177841186523	-0.605375289916992	1.17776298522949	0	-7.84331703186035	-2.25103378295898	2.66952991485596	-1.91216087341309	-1.32522773742676	-3.35259056091309	0.390215873718262	-1.71530342102051	1.50789833068848	0.429893493652344	-0.770050048828125	-0.440263748168945	-1.13730239868164	-1.47673988342285	-5.0440616607666	-0.967873573303223	-8.30009174346924	-1.14482688903809	-6.61568880081177	-0.675693511962891	-7.50709581375122	-1.94473934173584	0.847766876220703	-2.91480255126953	-5.931480884552	-1.52319240570068	-8.03654956817627	-2.5789155960083	-1.46021270751953
703	XP_011261399.1;E2ANT2		0.515014	0.499909	0.884429	0.310078	tr|E2ANT2|E2ANT2_CAMFO Vitellogenin OS=Camponotus floridanus (Florida carpenter ant) OX=104421 GN=EAG_14638 PE=4 SV=1	-4.259596824646	-6.66705703735352	-5.08373975753784	-2.62974548339844	-4.05573463439941	-4.74320507049561	-4.8150463104248	-1.47298431396484	-2.4868745803833	-6.93673515319824	-7.31487607955933	-9.14870262145996	-6.86774444580078	-5.52521419525146	1.12824630737305	-4.74260234832764	-7.2923150062561	-6.12038230895996	-5.07274341583252	-5.08414363861084	-6.797119140625	-3.03543281555176	-5.19656372070313	-4.73058319091797	-4.53899478912354	-6.83537292480469	-3.43893241882324	-7.84537506103516	-0.671511650085449	-7.01337480545044	-9.28468036651611	-5.37199974060059	-10.9873523712158	-9.29025650024414	-7.68374156951904	-4.51291084289551	-6.68407964706421	-8.02338886260986	3.64902591705322	-3.12692737579346	-8.70544719696045	-6.03018712997437
710	XP_011261591.1;E2AP90		0.59256	0.427842	1.05446	0.361809	tr|E2AP90|E2AP90_CAMFO Vacuolar proton pump subunit B OS=Camponotus floridanus (Florida carpenter ant) OX=104421 GN=EAG_05177 PE=3 SV=1	-0.363717079162598	0.0497322082519531	-1.88191223144531	0.167211532592773	-1.38641738891602	0.857162475585938	-0.557586669921875	0.0320758819580078	-3.13947010040283	-4.48464012145996	-2.87469482421875	-5.89942932128906	-1.17531204223633	-8.68119812011719	-3.02616310119629	-2.32542324066162	6.08448791503906	-3.25751686096191	-8.70967292785645	-2.75590801239014	-0.499971389770508	-3.10686492919922	0.836215972900391	-2.11551475524902	-2.60501480102539	-8.66984176635742	-2.47800636291504	-0.463663101196289	-6.4185905456543	-7.96849536895752	2.33385848999023	-3.13395309448242	-2.552001953125	-5.28591394424438	-2.51892185211182	-5.12454986572266	-3.95582580566406	-1.03112411499023	0.583355903625488	-4.99110841751099	-3.14420032501221	-0.28590202331543
714	XP_011261637.1;E2APC4		1.0724	0.24581	-1.5241	-0.532445	tr|E2APC4|E2APC4_CAMFO Myosin-IA OS=Camponotus floridanus (Florida carpenter ant) OX=104421 GN=EAG_08849 PE=3 SV=1	-6.86107158660889	-1.64748382568359	-4.11910629272461	-6.80762100219727	-2.81793975830078	-0.812088012695313	-5.80209445953369	0.463888168334961	-9.48085117340088	-2.65603446960449	-3.5376148223877	-7.92691326141357	-7.24038314819336	-1.01731491088867	-3.75812721252441	-1.27995204925537	-0.0285663604736328	-1.62621879577637	-9.62215042114258	-1.59451389312744	-4.09524536132813	-9.67941665649414	-0.513774871826172	-6.01631546020508	-2.0201587677002	-1.19700813293457	-0.0637912750244141	-5.32475852966309	-1.43063831329346	-0.571868896484375	-5.05132865905762	0	-1.07274436950684	-2.27511119842529	-5.09571743011475	-1.68988800048828	-7.77828979492188	-2.82587432861328	-0.0132970809936523	-2.08864498138428	-1.26315402984619	-2.71294021606445
737	E2AQI6;XP_011262241.1;XP_011262243.1;XP_011262250.1;XP_019884226.1;XP_011262249.1;XP_011262248.1;XP_011262247.1;XP_011262246.1;XP_011262245.1;XP_011262244.1		0.061736	0.926142	0.165497	0.0554298	tr|E2AQI6|E2AQI6_CAMFO Glucosamine--fructose-6-phosphate aminotransferase [isomerizing] 2 OS=Camponotus floridanus (Florida carpenter ant) OX=104421 GN=EAG_12078 PE=4 SV=1;|XP_011262241.1 uncharacterized protein LOC105254948 [Camponotus floridanus]	2.78060817718506	1.53142738342285	-0.716075897216797	-0.368707656860352	2.35143089294434	-2.11157608032227	-1.94294166564941	-4.88613033294678	1.54527568817139	-1.67030906677246	-6.89202880859375	-3.32658004760742	2.05858039855957	-3.6061954498291	-4.3009033203125	-3.95438098907471	-0.415920257568359	2.22763633728027	-3.18761253356934	2.3654260635376	0.254959106445313	-1.49831771850586	-5.6304931640625	-3.62833023071289	-1.62717247009277	-9.21783065795898	-2.64505958557129	1.59972763061523	2.51013469696045	-6.58846235275269	0.948383331298828	-2.64441299438477	2.0430793762207	-0.435891151428223	0.936944007873535	2.76872062683105	0.650728225708008	-1.2037525177002	-7.96327877044678	-3.47078418731689	-4.60566234588623	2.46130561828613
743	XP_011262417.1;E2AQX7;CON__ENSEMBL:ENSBTAP00000025008		1.29886	0.168167	1.92841	0.652377	tr|E2AQX7|E2AQX7_CAMFO Tubulin beta chain OS=Camponotus floridanus (Florida carpenter ant) OX=104421 GN=EAG_08224 PE=3 SV=1	-0.642647743225098	0.957651138305664	-0.000650405883789063	0.100658416748047	-1.12683868408203	-8.28552436828613	-0.222200393676758	-0.639251708984375	-3.4091215133667	-2.8891429901123	-2.29096603393555	-1.98297119140625	-0.644313812255859	-9.44255924224854	1.06856727600098	-1.22361660003662	-2.76993751525879	-3.74151420593262	-2.970458984375	-1.0495138168335	0.31419563293457	-7.8333854675293	-2.06771469116211	-1.03749465942383	-6.17569255828857	-2.39705657958984	-3.35532379150391	-1.28400230407715	-0.15132999420166	-9.80396461486816	-2.52000999450684	-6.34298038482666	-9.61253070831299	-7.58826780319214	-9.53671741485596	-3.27323722839355	-1.91032028198242	-9.37592124938965	-1.0562047958374	-2.05636501312256	-3.81898593902588	-0.535978317260742
758	XP_011262697.2;E2ARG4;E2A6I8;XP_011252363.1;XP_011252362.1		0.0354047	0.951976	-0.0876201	-0.0303595	tr|E2ARG4|E2ARG4_CAMFO Beta-hexosaminidase OS=Camponotus floridanus (Florida carpenter ant) OX=104421 GN=EAG_09586 PE=3 SV=1	0.342288017272949	0.948554992675781	0.752067565917969	0.0962581634521484	2.64526176452637	-5.7231707572937	0.46247673034668	-7.19029712677002	-1.65627574920654	-0.0216770172119141	2.16162872314453	2.85471343994141	2.92115783691406	-3.5470027923584	-1.83454322814941	-2.18785381317139	-4.57915830612183	1.53128051757813	-3.82057571411133	2.27347660064697	1.12580490112305	0.268314361572266	0.584817886352539	1.74345970153809	-2.27895164489746	2.7779655456543	-3.10428810119629	2.13595390319824	0.953734397888184	-0.26849365234375	2.06506729125977	-4.82673835754395	1.19544219970703	-8.05141353607178	0.178389549255371	2.45493316650391	1.48099327087402	-4.64509582519531	-0.153409004211426	1.10837459564209	-3.098069190979	2.26626014709473
761	E2ARH9;XP_011262712.1		0.0583352	0.946289	0.113284	0.0417765	tr|E2ARH9|E2ARH9_CAMFO PA2c domain-containing protein OS=Camponotus floridanus (Florida carpenter ant) OX=104421 GN=EAG_09601 PE=3 SV=1;|XP_011262712.1 phospholipase A2 [Camponotus floridanus]	1.66536617279053	2.33919906616211	3.75969696044922	4.58742713928223	3.50918006896973	6.60340309143066	4.6448802947998	8.08621406555176	5.05200672149658	3.30880928039551	1.38440322875977	-2.12072944641113	1.95732307434082	3.89909934997559	5.68537712097168	3.33069896697998	5.87257957458496	2.48691177368164	4.19144058227539	1.80259990692139	2.20922470092773	4.43274688720703	2.10923385620117	4.07006454467773	5.01834297180176	4.3641300201416	6.7415771484375	-0.495601654052734	4.9967679977417	5.82881927490234	3.75173187255859	4.07082557678223	3.5627384185791	4.34560871124268	3.36766910552979	5.21942901611328	-0.105669021606445	2.45123100280762	-4.01810741424561	6.20497989654541	3.36634540557861	1.40339279174805
773	XP_019884394.1;XP_011262974.1;E2ARX6		1.08873	0.46715	-0.833014	-0.337738	tr|E2ARX6|E2ARX6_CAMFO Voltage-dependent anion-selective channel OS=Camponotus floridanus (Flo	3.8134069442749	4.09419441223145	0.679288864135742	3.82621955871582	1.05479431152344	-0.0494060516357422	1.27048301696777	0.706117630004883	0.67716121673584	3.09720230102539	2.1357364654541	-0.750051498413086	3.91444396972656	2.23341751098633	1.20459747314453	1.73904323577881	1.49092674255371	4.15320777893066	1.0172176361084	3.55368518829346	3.35111045837402	0.943151473999023	2.83575630187988	3.65640449523926	4.75647163391113	0.358160018920898	5.0186939239502	2.46897125244141	4.18935871124268	1.8149471282959	2.40752029418945	3.18627166748047	1.47259902954102	0.62522029876709	3.7087984085083	5.27765464782715	1.35771560668945	4.32281303405762	0.293694496154785	1.30254650115967	4.33719539642334	3.1473274230957
790	XP_011263352.1;E2ASQ5		1.96177	0.189419	1.57572	0.608165	tr|E2ASQ5|E2ASQ5_CAMFO Uncharacterized protein OS=Camponotus floridanus (Florida carpenter ant) OX=104421 GN=EAG_16430 PE=4 SV=1	0.963412284851074	-1.63474273681641	0.390237808227539	4.92716598510742	3.92985725402832	4.70171356201172	2.35882377624512	5.65323066711426	4.56942462921143	2.05643081665039	0.77276611328125	-0.428050994873047	2.20207023620605	2.74688148498535	2.0712833404541	2.24719333648682	3.0693359375	1.45691299438477	3.49651145935059	-0.480711936950684	1.23584175109863	4.8910961151123	0.559112548828125	4.02827262878418	2.23746490478516	1.17793655395508	1.05288314819336	-3.82179260253906	2.67808437347412	0.672042846679688	-0.0394039154052734	-0.608150482177734	-1.60734939575195	1.68346118927002	0.931149482727051	-0.397216796875	-0.689201354980469	-1.74549293518066	3.16771793365479	2.5835599899292	1.19272708892822	-0.791221618652344
814	E2AU22;XP_019884578.2		0.16392	0.828059	-0.339844	-0.119935	tr|E2AU22|E2AU22_CAMFO Gamma-interferon-inducible lysosomal thiol reductase OS=Camponotus floridanus (Florida carpenter ant) OX=104421 GN=EAG_15912 PE=4 SV=1;|XP_019884578.2 LOW QUALITY PROTEIN: GILT-like protein 1 [Camponotus floridanus]	-5.03503704071045	-0.6607666015625	1.63956832885742	-1.87934303283691	-3.83403778076172	-0.745473861694336	-3.63337516784668	-6.57503604888916	-2.68944835662842	1.02305030822754	3.26226806640625	4.13411521911621	0.130670547485352	3.55964851379395	-0.912649154663086	-2.14151096343994	-0.00520515441894531	-0.926675796508789	-6.11156368255615	0.357596397399902	-3.11526107788086	-0.562698364257813	-1.11237907409668	0.468406677246094	-1.72664070129395	-0.672416687011719	-1.60305023193359	-0.80851936340332	2.33931064605713	2.86025810241699	-0.121681213378906	0.0853424072265625	-1.35592079162598	-2.99529552459717	2.27660274505615	-3.54741668701172	1.02486419677734	-3.04265594482422	1.48400402069092	-1.62174129486084	-8.62291431427002	-0.0781917572021484
836	E2AV99;XP_011264553.1		0.391797	0.623922	-0.681302	-0.242376	tr|E2AV99|E2AV99_CAMFO Tr-type G domain-containing protein OS=Camponotus floridanus (Florida carpenter ant) OX=104421 GN=EAG_16395 PE=4 SV=1;|XP_011264553.1 translation elongation factor 2 [Camponotus floridanus]	-2.46763515472412	-2.27293395996094	-3.58270263671875	-2.08802223205566	-1.37927436828613	-8.59649181365967	-6.55179834365845	-8.23873424530029	-8.92838478088379	-3.53748512268066	-3.95474815368652	-3.8007698059082	-2.38122367858887	-6.04526138305664	-1.50006866455078	-3.08078289031982	-7.35956859588623	-3.77774810791016	-9.907057762146	-2.61679553985596	-2.52176284790039	-1.7665843963623	-3.26618194580078	-2.75829887390137	-7.21173048019409	-8.31187057495117	-3.50895118713379	-1.58887481689453	-0.887738227844238	-1.24365043640137	-3.57043838500977	-6.6418833732605	-6.29596710205078	-8.10199165344238	-0.995991706848145	-7.63923072814941	-0.874383926391602	-1.40191459655762	-1.69142055511475	-3.17567539215088	-1.60378932952881	-2.1345100402832
841	XP_011264753.1;E2AVK0		0.971895	0.211902	1.67904	0.55636	tr|E2AVK0|E2AVK0_CAMFO Uncharacterized protein OS=Camponotus floridanus (Florida carpenter ant) OX=104421 GN=EAG_13867 PE=4 SV=1	-7.01004791259766	2.94041061401367	-0.473430633544922	1.54813385009766	-1.83165740966797	1.61004257202148	-2.37788963317871	2.08448028564453	-8.22841835021973	-2.37311553955078	0.343536376953125	-1.93362426757813	-2.83966827392578	-0.635347366333008	0.766195297241211	-2.61952304840088	-9.33127784729004	-7.57732915878296	0.00214767456054688	-1.15675830841064	-2.25686264038086	1.85420227050781	-6.16189670562744	-0.626203536987305	-1.75481224060059	0.041168212890625	-2.35701942443848	-4.10680198669434	-0.514769554138184	-6.38187122344971	-1.45078086853027	-8.52770233154297	-6.77520370483398	-8.60510730743408	-2.06387805938721	-8.47441482543945	-0.677783966064453	-2.6508674621582	-3.6384916305542	-4.84477758407593	-8.19594764709473	-0.0342063903808594
847	XP_011264892.1;XP_011264890.1;E2AVV1		0.548602	0.703765	-0.453256	-0.187573	tr|E2AVV1|E2AVV1_CAMFO Nucleoplasmin domain-containing protein OS=Camponotus floridanus (Florida carpe	3.93690395355225	3.02629089355469	1.24251937866211	1.81961059570313	3.44046592712402	1.30396842956543	3.08013725280762	-1.27718162536621	2.07602405548096	0.745082855224609	1.95774078369141	3.18342018127441	5.0565071105957	1.66866302490234	1.71784400939941	3.29220485687256	2.20739555358887	2.69027137756348	1.57948112487793	3.79099750518799	1.90653991699219	2.05611228942871	2.63934898376465	3.5201244354248	3.73498916625977	0.834566116333008	4.13814163208008	2.35918998718262	4.57444286346436	2.41559219360352	1.622314453125	3.64568710327148	1.66872978210449	2.72335720062256	4.02455806732178	3.45623207092285	2.80329322814941	1.6032829284668	0.0395841598510742	0.581215858459473	5.97511577606201	2.77242469787598
858	XP_025265510.1;XP_019884763.1;XP_011265197.1;XP_011265195.1;XP_019884762.1;XP_019884761.1;XP_011265194.1;XP_011265193.1;XP_011265191.1;XP_011265190.1;XP_011265189.1;E2AWB0		0.0888969	0.914447	0.17951	0.0649962	|XP_011265197.1 multidrug resistance protein homolog 49 isoform X2 [Camponotu	-5.61898565292358	-2.82402610778809	-4.57482147216797	-5.45997619628906	-7.07502508163452	-1.60503387451172	-3.72319221496582	-5.0060338973999	-8.46446228027344	-1.48666572570801	-5.82888221740723	-6.49506950378418	-5.81557273864746	-3.36691665649414	-3.58338737487793	-2.56508731842041	-7.67795610427856	-3.77157211303711	-9.208420753479	-4.56873226165771	-7.26353931427002	-9.26808834075928	0.177663803100586	-5.55931663513184	-3.91311454772949	-9.670334815979	-1.55981826782227	-7.33132743835449	-3.53277111053467	-9.76937294006348	-7.22586250305176	-4.45776557922363	-2.5795955657959	-2.85617923736572	-5.21925449371338	-0.725709915161133	-5.52623558044434	-4.58424758911133	-3.82769107818604	-6.47668743133545	-8.33290481567383	-6.31829071044922
874	E2AX18;XP_011265519.1;XP_011265517.1		1.30371	0.2154	1.53926	0.557478	tr|E2AX18|E2AX18_CAMFO Glutathione S-transferase OS=Camponotus floridanus (Florida carpenter ant) OX=104421 GN=EAG_01201 PE=3 SV=1;|XP_011265519.1 glutathione S-transferase-like [Camponotus floridanus]	-4.98183727264404	0.576919555664063	2.13315010070801	1.85788726806641	0.933664321899414	4.45448875427246	1.36128997802734	4.48453903198242	1.64799213409424	0.251834869384766	-0.448041915893555	-3.73363876342773	-6.37546539306641	3.10702705383301	1.99480247497559	0.533465385437012	3.65615272521973	0.204757690429688	3.16411209106445	-0.267325401306152	1.64349555969238	2.25199890136719	-1.2584114074707	-2.98908424377441	1.61650657653809	0.893234252929688	1.5594539642334	-3.18788528442383	1.12869739532471	0.671228408813477	2.49792861938477	0.0102367401123047	-0.0549678802490234	-3.47950649261475	-0.861233711242676	-4.40751075744629	-1.85176277160645	0.819858551025391	-1.91534900665283	-2.83210849761963	1.938157081604	-2.54925918579102
879	E2AX77;XP_025264787.1;XP_025264786.1;XP_025264785.1;XP_025264784.1;XP_025264782.1;XP_011265555.2;XP_011265554.2;XP_011265551.2		0.305653	0.697915	-0.535664	-0.192862	tr|E2AX77|E2AX77_CAMFO Probable chitinase 1 OS=Camponotus floridanus (Florida carpenter ant) OX=104421 GN=EAG_01712 PE=4 SV=1;|XP_02526	-7.28478145599365	-4.58175849914551	-3.77573776245117	-6.17498970031738	-7.53514909744263	0.511409759521484	-2.59807014465332	-8.17423915863037	-4.45595455169678	-0.796463012695313	1.8845386505127	2.15478515625	-1.59830474853516	-3.4669246673584	-3.52370643615723	-2.98006916046143	-2.08933639526367	-3.22654914855957	-7.3944616317749	0.298678398132324	-5.99079513549805	-8.78468036651611	-1.36730194091797	-4.25319290161133	-1.12654113769531	-3.12610816955566	-2.40209007263184	-2.32919120788574	-3.48304080963135	-1.63981246948242	-5.20840835571289	-2.45717239379883	-1.63223266601563	-1.56811237335205	-4.07973384857178	-1.8518009185791	-2.45877456665039	-7.01735973358154	-2.99734592437744	-1.06227970123291	-3.17832279205322	-5.02616500854492
895	E2AY06;XP_011266013.1		0.167441	0.843885	-0.298203	-0.109713	tr|E2AY06|E2AY06_CAMFO Peptidase_M14 domain-containing protein OS=Camponotus floridanus (Florida carpenter ant) OX=104421 GN=EAG_12714 PE=4 SV=1;|XP_011266013.1 carboxypeptidase B [Camponotus floridanus]	0.163754463195801	-1.38555908203125	3.2465763092041	-5.61840057373047	-0.622915267944336	-6.44611024856567	-0.34929084777832	-0.968772888183594	-1.34795665740967	0.66346549987793	2.83130836486816	2.63523292541504	0.479530334472656	-7.29826736450195	-0.59324836730957	0.836773872375488	0.790699005126953	0.78245735168457	-2.11062049865723	2.38743495941162	-1.64703559875488	-2.09603500366211	0.786787033081055	0.989286422729492	-1.28659057617188	1.12093925476074	1.79960250854492	-0.724575042724609	-1.81701946258545	1.52885627746582	-3.54160118103027	-3.3634204864502	1.96088218688965	-0.067805290222168	-2.049880027771	-0.492410659790039	0.906221389770508	0.0465431213378906	1.97334957122803	-2.54424571990967	0.930914878845215	-1.1920051574707
923	E2AZ59;XP_011266628.1		0.731304	0.602958	0.645592	0.260363	tr|E2AZ59|E2AZ59_CAMFO Peptidase A1 domain-containing protein OS=Camponotus floridanus (Florida carpenter ant) OX=104421 GN=EAG_08757 PE=3 SV=1;|XP_011266628.1 lysosomal aspartic protease [Camponotus floridanus]	7.49117565155029	8.40501403808594	9.21159934997559	7.40230751037598	8.09938430786133	10.64430809021	9.68611907958984	11.1688671112061	10.1910429000854	10.0289840698242	8.03639221191406	5.23214530944824	7.10865020751953	10.4457664489746	9.20590209960938	10.3241567611694	12.0800037384033	8.80628967285156	8.92532348632813	9.16101741790771	8.97096633911133	10.2330188751221	9.56707954406738	8.51370048522949	10.4228000640869	8.82345008850098	9.10363578796387	4.97728538513184	9.26491260528564	10.0727195739746	7.04747200012207	9.96601104736328	8.53144836425781	9.86668682098389	8.28971195220947	8.65857315063477	7.31145668029785	8.29730987548828	4.77606105804443	9.7568883895874	9.90376567840576	6.48488998413086
931	XP_011266818.1;E2AZK6;XP_011266817.1		1.80091	0.190286	1.65091	0.621638	tr|E2AZK6|E2AZK6_CAMFO Sulfatase domain-containing protein OS=Camponotus floridanus (Florida carpenter ant) OX=104421 GN=EAG_15528 PE=4 SV=1;|XP_011266817.1 arylsulfatase B isoform X1 [Campon	-3.86877727508545	0.838102340698242	-0.556608200073242	0.601737976074219	-7.23414707183838	5.27530097961426	-0.30787467956543	3.71446228027344	-0.59221363067627	0.244718551635742	0.881374359130859	-0.0924568176269531	-0.247451782226563	1.63823509216309	-2.09307098388672	1.61658191680908	4.59346008300781	1.38479804992676	0.35032844543457	-0.416666984558105	0.378265380859375	2.28385162353516	0.269216537475586	0.182077407836914	-0.0102558135986328	0.402053833007813	-0.722856521606445	-2.65494155883789	-2.79364681243896	-1.39720726013184	-2.81111145019531	0.0555858612060547	-4.29057502746582	-0.218363761901855	-1.40632915496826	0.58653450012207	-0.893903732299805	-2.61944198608398	-2.32752132415771	-0.102873802185059	-2.98311901092529	-2.31665229797363
936	XP_011266934.1;E2AZT6		0.0121847	0.973093	0.0228877	0.00861761	tr|E2AZT6|E2AZT6_CAMFO Laminin subunit alpha OS=Camponotus floridanus (Florida carpenter ant) OX=104421 GN=EAG_15041 PE=4 SV=1	-5.40855884552002	-3.95599555969238	-3.56961441040039	-6.33983039855957	-5.56461334228516	-4.528977394104	-3.4217529296875	-6.02689599990845	-4.63018703460693	-3.53309059143066	-2.71923637390137	-2.7773380279541	-2.4222240447998	-10.7041540145874	-1.95707511901855	-9.63654804229736	-9.64721775054932	-4.52568817138672	-6.62627696990967	-5.00318431854248	-3.8676586151123	-6.15479278564453	-10.9149990081787	-3.74691009521484	-3.30048751831055	-3.54241752624512	-6.964768409729	-4.74930763244629	-4.98879718780518	-7.13559532165527	-4.74127388000488	-6.48750591278076	-8.07523441314697	-7.19251871109009	-5.47301387786865	-3.76316261291504	-5.21057891845703	-7.46259260177612	-5.60838031768799	-5.12980318069458	-4.52248668670654	-4.10830688476563
943	XP_011267179.1;E2B0D3		1.4145	0.237689	-1.40336	-0.528312	tr|E2B0D3|E2B0D3_CAMFO Protein FAM151A OS=Camponotus floridanus (Florida carpenter ant) OX=104421 GN=EAG_12328 PE=4 SV=1	0.832627296447754	0.139328002929688	-0.948968887329102	0.310846328735352	0.276082992553711	-0.20515251159668	1.20633888244629	-9.28341388702393	-1.45525455474854	-1.81532096862793	-0.102907180786133	0.94146728515625	2.42425346374512	-7.24060487747192	-3.32680702209473	-0.354239463806152	-1.18732833862305	-0.518030166625977	-2.17201232910156	0.330451011657715	-1.30347061157227	-1.47368049621582	-1.00968933105469	2.31677436828613	0.750619888305664	0.545652389526367	1.15767478942871	0.0679435729980469	0.123026847839355	-0.310153961181641	-0.871206283569336	-0.372142791748047	0.856300354003906	1.49579334259033	2.63075542449951	2.6208381652832	0.385610580444336	0.0209846496582031	-1.14402484893799	-2.80445003509521	-2.31939029693604	1.3890495300293
950	E2B123;XP_025270483.1;XP_011267482.1		1.66872	0.132727	-1.9506	-0.692786	tr|E2B123|E2B123_CAMFO MFS domain-containing protein OS=Camponotus floridanus (Florida carpenter ant) OX=104421 GN=EAG_15098 PE=3 SV=1;|XP_011267482.1 facilitated treha	-8.35071086883545	-2.13438415527344	-8.32718658447266	-1.20481491088867	-7.04321718215942	-0.349899291992188	-6.75162887573242	0.0131511688232422	-8.03279113769531	-7.75318431854248	-6.85634422302246	-3.36252784729004	-3.62711906433105	-1.79149436950684	-7.70341777801514	-1.15615367889404	-2.18356704711914	-7.86248254776001	-3.28014183044434	-4.10075283050537	-2.0024356842041	0.832113265991211	-0.166332244873047	-7.09751319885254	-1.27662658691406	-4.01659774780273	-2.8305549621582	-0.416187286376953	-3.19024753570557	-1.69854354858398	-1.82718086242676	-1.32658195495605	-2.72686386108398	-0.781622886657715	-2.86156177520752	-2.06747436523438	-1.69045066833496	-3.55397033691406	2.99376583099365	-1.57097339630127	-3.50563526153564	-1.94836235046387
958	XP_011267621.1;E2B1B7		1.19845	0.446205	-0.857848	-0.350221	tr|E2B1B7|E2B1B7_CAMFO Proactivator polypeptide OS=Camponotus floridanus (Florida carpenter ant) OX=104421 GN=EAG_12476 PE=4 SV=1	-2.32993030548096	-1.56461906433105	-2.49755096435547	-1.94374084472656	-3.50717353820801	-1.45099639892578	-2.25057983398438	-1.19110679626465	-8.31217098236084	-2.94009590148926	-2.39396858215332	-1.9111213684082	-0.397436141967773	-1.39905166625977	-0.979930877685547	-1.00750255584717	-3.0284538269043	-1.9835376739502	-5.22487354278564	-1.40222072601318	-2.45388793945313	-2.7297534942627	-1.30125045776367	-0.580678939819336	-0.132558822631836	-4.17879104614258	0.264827728271484	-3.71464920043945	-0.137236595153809	-1.75136756896973	-2.24628448486328	-1.77191734313965	-1.24352645874023	-0.649029731750488	0.0667333602905273	-1.28017807006836	-2.59977722167969	-1.33269309997559	-2.07958126068115	-2.90487384796143	-1.6028470993042	-1.78470420837402
974	E2B227;XP_011267964.1		0.31528	0.683586	-0.554876	-0.199211	tr|E2B227|E2B227_CAMFO Tetraspanin OS=Camponotus floridanus (Florida carpenter ant) OX=104421 GN=EAG_04362 PE=3 SV=1;|XP_011267964.1 23 kDa integral membrane protein [Camponotus floridanus]	2.15627956390381	2.90437698364258	1.69753456115723	2.12239456176758	2.71887016296387	-0.0233726501464844	3.13070106506348	-6.21453237533569	1.14523792266846	-1.20241546630859	2.70950698852539	1.95952033996582	3.58338356018066	-8.46463203430176	1.38764953613281	2.67839336395264	0.560678482055664	2.99283981323242	0.202003479003906	1.19749164581299	1.85199165344238	-1.63994216918945	5.87729835510254	3.67263221740723	-0.233125686645508	-3.04746246337891	2.19338607788086	1.34671020507813	0.96280574798584	0.240398406982422	1.89013290405273	2.29143905639648	2.08498954772949	4.64252758026123	1.79087352752686	2.13085174560547	1.53488159179688	1.4222526550293	4.0000638961792	-0.379137992858887	-0.541789054870605	2.61719131469727
979	E2B271;XP_011268025.2		1.34841	0.161538	1.89036	0.648849	tr|E2B271|E2B271_CAMFO Uncharacterized protein OS=Camponotus floridanus (Florida carpenter ant) OX=104421 GN=EAG_03191 PE=4 SV=1;|XP_011268025.2 pheromone-binding protein Gp-9 [Camponotus floridanus]	-5.58585071563721	-4.12753486633301	0.488807678222656	1.69165992736816	-0.163059234619141	-9.02896976470947	-3.18361854553223	-3.22813415527344	-1.66905117034912	-2.15885353088379	-0.874231338500977	-0.664634704589844	-2.00156784057617	-9.86596775054932	1.57580184936523	-4.27421855926514	-2.00738716125488	-5.32377433776855	1.40327644348145	-4.12533283233643	-3.09988403320313	1.05332183837891	-8.90617179870605	-4.45832633972168	-2.21866035461426	-1.82923126220703	-5.25028228759766	-6.068603515625	-1.16072559356689	-3.38535499572754	-4.98843193054199	-3.67209053039551	-3.38556480407715	-8.17214584350586	-5.9558687210083	-7.8640718460083	-2.46338844299316	-5.32723760604858	0.651917457580566	-5.04231834411621	-7.99963665008545	-6.72793197631836
1028	XP_011252309.2;E2A6E2		0.926973	0.226105	-1.71559	-0.557851	tr|E2A6E2|E2A6E2_CAMFO Protein G12 OS=Camponotus floridanus (Florida carpenter ant) OX=104421 GN=EAG_09917 PE=4 SV=1	-0.559878349304199	-3.87380790710449	1.41094398498535	-0.887815475463867	2.94567680358887	-6.32904195785522	-6.81659173965454	-9.07701301574707	-0.00931453704833984	-7.28573226928711	-1.76937866210938	-0.530290603637695	0.981256484985352	-9.11085414886475	-3.79515647888184	-0.894890785217285	-0.915887832641602	-2.61289215087891	-3.77065086364746	-0.215292930603027	-1.04754638671875	2.13138008117676	-2.33846092224121	-0.617813110351563	-2.27624320983887	-4.51920127868652	-5.37981367111206	2.36564254760742	-0.0367326736450195	-6.84737873077393	0.844961166381836	-4.4051685333252	-6.56478929519653	-3.83092021942139	1.23823833465576	-0.153884887695313	2.42372131347656	2.71047782897949	6.22006511688232	3.09832859039307	-1.3889799118042	2.71854972839355
1030	XP_011252500.2;E2A6T2		0.55939	0.655733	0.5711	0.226892	|XP_011252500.2 protein CREG1 [Camponotus floridanus]	10.2709913253784	10.8404560089111	12.128963470459	9.80205535888672	11.1790332794189	13.7976684570313	11.3360042572021	13.6828727722168	12.5811796188354	12.7502117156982	10.6333599090576	7.06621932983398	8.61223220825195	13.5680160522461	11.692440032959	12.1165723800659	14.9616317749023	11.4394626617432	11.6086616516113	11.9828519821167	11.2471885681152	11.9384155273438	12.2068767547607	10.3458404541016	12.8789844512939	11.5624656677246	11.9619007110596	7.52728652954102	11.6395425796509	12.4869289398193	9.93692398071289	12.6607360839844	11.3397369384766	12.517746925354	10.5792303085327	11.6316890716553	9.70921897888184	11.5963821411133	7.20154476165771	12.8096284866333	12.0071249008179	8.81471633911133
1039	XP_011253495.1;E2A8P0		0.542031	0.627248	-0.628083	-0.243226	tr|E2A8P0|E2A8P0_CAMFO Deoxyribonuclease-2-alpha OS=Camponotus floridanus (Florida carpenter ant) OX=104421 GN=EAG_14030 PE=4 SV=1	1.81347560882568	3.66841697692871	4.59573554992676	3.48579788208008	3.83756637573242	5.97172355651855	4.55777931213379	3.43863296508789	5.1008996963501	5.68132400512695	3.29623603820801	-2.26647186279297	2.1895580291748	5.2142219543457	4.12905883789063	5.31584072113037	6.6541576385498	4.39519691467285	4.16978073120117	3.03814601898193	3.92932510375977	5.38439559936523	4.6780948638916	3.0879020690918	6.75211906433105	4.45090675354004	7.25089836120605	1.11764717102051	5.71374416351318	6.47418212890625	3.75458526611328	5.56904792785645	5.51952362060547	5.89378261566162	4.82284641265869	5.06182098388672	2.90378379821777	3.77864074707031	-0.711777687072754	7.49921321868896	5.31812381744385	3.35723876953125
1045	XP_011254133.1;E2A9W2		1.69187	0.1148	-2.05107	-0.71976	tr|E2A9W2|E2A9W2_CAMFO Thioredoxin domain-containing protein OS=Camponotus floridanus (Florida carpenter ant) OX=104421 GN=EAG_08823 PE=3 SV=1	0.477896690368652	1.11530685424805	1.31469345092773	0.502265930175781	-2.11627197265625	3.16329002380371	-5.76459407806396	4.15355491638184	-3.44148921966553	-6.76051950454712	-2.75882530212402	-4.48260116577148	-0.856733322143555	3.93657684326172	0.731779098510742	1.57372379302979	2.96783256530762	1.41917037963867	-8.2913932800293	-0.434082984924316	2.20927238464355	-4.29372215270996	-0.686977386474609	-1.12558174133301	3.00767135620117	1.44146156311035	1.64615249633789	0.407075881958008	2.63146686553955	3.33626365661621	0.675592422485352	2.11264038085938	1.68709182739258	2.89354038238525	2.0901517868042	1.54351806640625	0.98457145690918	2.84309387207031	-0.542080879211426	1.84921741485596	2.55625247955322	0.277921676635742
1046	XP_011254210.2;XP_011254209.2;E2AA04		1.54996	0.155704	1.81458	0.648637	tr|E2AA04|E2AA04_CAMFO SERPIN domain-containing protein OS=Camponotus floridanus (Florida carp	-1.41693019866943	-1.36733245849609	1.82472801208496	-1.67103004455566	-1.64862823486328	-5.09849452972412	-0.274969100952148	-3.79168510437012	0.430869102478027	1.52189636230469	2.75046348571777	2.06041145324707	-0.435886383056641	-4.24704933166504	3.32558631896973	-2.85317325592041	-1.52971076965332	-0.923616409301758	-2.17717361450195	-0.071925163269043	-1.31637382507324	-2.64011383056641	-0.72587776184082	-0.429738998413086	-1.1351490020752	-0.73320198059082	-1.24831962585449	-1.74654197692871	-0.167521476745605	-0.800392150878906	-2.01604270935059	-11.0635995864868	-1.4197998046875	-8.45172500610352	-1.95036602020264	-2.3677978515625	-0.987514495849609	-2.7967472076416	-1.54658985137939	-2.99748134613037	-8.8143835067749	-2.0711727142334
1054	XP_011255562.2		0.280008	0.7123	0.512373	0.183071	|XP_011255562.2 peritrophin-48 [Camponotus floridanus]	-0.237837791442871	-3.11076545715332	-0.894229888916016	-1.02321243286133	0.0907230377197266	-1.71362686157227	-5.82339668273926	-1.10977554321289	-2.15520000457764	-3.28190612792969	-4.25972366333008	-3.95559310913086	1.59869003295898	0.405572891235352	-2.68424034118652	-3.09283351898193	-1.39611053466797	-1.08270072937012	-7.54786682128906	-3.28720188140869	-0.708288192749023	-2.19626235961914	-4.94887542724609	-4.76804161071777	-0.845809936523438	-1.47946357727051	-2.81546974182129	1.72956085205078	-4.09449291229248	-0.367467880249023	1.63739395141602	-6.34323596954346	-1.72653579711914	-1.03781604766846	-2.7739725112915	-0.969320297241211	0.0735683441162109	-4.41759300231934	-7.53281307220459	-9.20138168334961	-4.80289745330811	0.449951171875
1072	XP_011257736.2		0.600619	0.438833	-1.06897	-0.366371	|XP_011257736.2 leucine-rich repeat-containing G-protein coupled receptor 5-like [Camponotus floridanus]	-2.93880939483643	-1.54430961608887	0	0.523563385009766	-0.210901260375977	-8.77795600891113	1.25131797790527	-7.31561994552612	0.350810050964355	2.60505485534668	2.13996505737305	2.34019660949707	0.0323581695556641	0.724954605102539	-0.784706115722656	1.19954586029053	1.28915405273438	1.42485618591309	1.64343070983887	1.08070850372314	-1.07977867126465	0.298614501953125	2.0831470489502	2.31963729858398	4.58413696289063	3.2952880859375	-1.10106658935547	-2.75420761108398	2.11020565032959	4.47849464416504	-3.52714538574219	3.95858764648438	-2.7558650970459	3.44005680084229	0.888249397277832	2.47585868835449	0.221225738525391	-7.5949649810791	0.0132970809936523	3.34009265899658	2.70025157928467	-0.813447952270508
1074	XP_011257802.2;XP_011257800.2		0.0611007	0.95284	0.0842908	0.033623	|XP_011257800.2 regucalcin isoform X1 [Camponotus floridanus]	8.05147838592529	9.0295352935791	10.1418113708496	8.07878112792969	8.61042213439941	10.7965393066406	10.0331707000732	12.3014106750488	10.7879228591919	10.9681453704834	9.0169506072998	5.59494972229004	6.74883270263672	11.321216583252	10.4163627624512	10.7766523361206	12.2563972473145	9.21685409545898	9.89464950561523	9.89210033416748	9.23275375366211	10.7723808288574	10.4910907745361	8.40574836730957	11.7601680755615	10.3643493652344	10.8143100738525	6.30892944335938	10.0941972732544	11.102201461792	8.39837074279785	10.9361152648926	10.2245712280273	11.5672807693481	8.88934230804443	10.3191890716553	7.70886039733887	9.95102310180664	5.75128078460693	11.4182634353638	10.5657835006714	8.24306106567383
1078	XP_011258566.1;XP_011258565.1;E2AIC5		0.945514	0.16688	2.17049	0.649535	tr|E2AIC5|E2AIC5_CAMFO 5-hydroxyisourate hydrolase OS=Camponotus floridanus (Florida carpenter ant)	1.84587955474854	2.37490081787109	2.46755218505859	-0.132486343383789	-0.960678100585938	-7.03178405761719	2.27987480163574	-9.57087230682373	-3.61101245880127	4.02872848510742	4.54976463317871	3.75509262084961	2.57778739929199	-7.70626735687256	5.91487884521484	1.8110990524292	1.62376594543457	2.79345321655273	-1.02783584594727	2.41586399078369	1.78713035583496	-1.7204532623291	1.36428070068359	2.6111946105957	-7.12169551849365	3.5996208190918	-0.519548416137695	1.66692352294922	0.902426719665527	-6.01001119613647	1.38525581359863	-8.58238792419434	-5.55750370025635	-8.70601367950439	2.91257572174072	2.08401679992676	1.8796272277832	0.213376998901367	0.730273246765137	-8.60329532623291	-10.4527034759521	2.29197692871094
1084	XP_011259278.2;E2AJM0;E2ANU0		0.0888718	0.92361	0.154014	0.0580349	tr|E2AJM0|E2AJM0_CAMFO COesterase domain-containing protein OS=Camponotus floridanus (Florida carpenter ant) OX=104421 GN=EAG_07773 PE=4 SV=1	4.03182506561279	4.68023490905762	5.90633964538574	2.22346115112305	4.7643985748291	7.2725715637207	6.16048240661621	-0.155029296875	5.23162364959717	6.0746955871582	5.60485649108887	2.98269081115723	4.50557327270508	7.71686935424805	4.65385055541992	4.55312824249268	7.57585716247559	4.7704906463623	6.18545722961426	4.34644412994385	5.91806983947754	7.80362892150879	6.24603652954102	6.01423263549805	7.95597267150879	8.18709373474121	6.3017635345459	2.00069999694824	6.67002201080322	2.72253227233887	3.77920532226563	7.68206977844238	1.67801666259766	7.10769367218018	4.88948535919189	5.10301399230957	2.80569267272949	6.25744438171387	0.524476051330566	7.58474254608154	5.500319480896	1.16472053527832
1085	XP_011259279.2		1.98777	0.127238	-1.90218	-0.702663	|XP_011259279.2 venom carboxylesterase-6 [Camponotus floridanus]	0.0808725357055664	0.0660839080810547	1.3802490234375	-4.41408348083496	0.906656265258789	-2.24225044250488	0.542583465576172	-2.60377502441406	1.88679981231689	2.31016159057617	1.13580703735352	-1.82109642028809	0.991626739501953	0.823953628540039	-6.66575717926025	1.94068050384521	2.89576148986816	3.55011558532715	2.34624671936035	2.83531284332275	1.12796211242676	4.04912567138672	1.81117248535156	1.87033653259277	5.45986747741699	3.40140151977539	4.08070945739746	-0.426061630249023	2.97135829925537	4.04264259338379	-0.495250701904297	3.89012718200684	3.82934379577637	2.23688411712646	2.58979892730713	4.62374496459961	1.38726806640625	1.68753242492676	-2.45808124542236	3.5206937789917	2.44569873809814	0.743745803833008
1086	XP_011259281.2		0.0396407	0.960455	-0.0550116	-0.0220129	|XP_011259281.2 uncharacterized protein LOC105253145 [Camponotus floridanus]	6.99015140533447	8.25311088562012	9.34607887268066	6.55373382568359	7.29460144042969	9.70635032653809	8.89682006835938	10.4884986877441	9.3935079574585	9.83259582519531	7.10444641113281	4.35082054138184	6.21210479736328	10.0942230224609	9.08608055114746	8.8732213973999	11.0957679748535	9.28828048706055	8.49294090270996	8.70947170257568	8.16306686401367	9.25743293762207	9.34029960632324	7.73245429992676	10.2920894622803	9.22477531433105	10.5358028411865	5.21696090698242	8.87632274627686	10.3052940368652	7.44531440734863	9.88952827453613	9.225830078125	9.99959278106689	8.32953929901123	9.41597557067871	6.57502365112305	8.98200988769531	4.68733501434326	9.84400844573975	9.76973628997803	6.35736656188965
1087	XP_011259391.1;XP_011259390.1;E2AJT8		0.364343	0.660538	0.637482	0.227381	tr|E2AJT8|E2AJT8_CAMFO Glyco_18 domain-containing protein OS=Camponotus floridanus (Florida carpen	-0.599761009216309	-1.06735992431641	-1.28771209716797	2.24070930480957	-3.10722160339355	-0.403556823730469	-1.3140869140625	-1.49643516540527	-1.55715656280518	2.52222061157227	3.60492134094238	4.39726829528809	2.35529708862305	-1.8422794342041	1.05582427978516	-2.64291477203369	-1.05106925964355	-1.99377250671387	-2.23225593566895	1.72890567779541	-1.45459175109863	-1.61528205871582	-0.748342514038086	0.905605316162109	-1.02641296386719	-0.230716705322266	0.213092803955078	1.03899574279785	2.01041698455811	-8.86372852325439	0.38752555847168	-1.28899765014648	-9.59968280792236	-0.770539283752441	-0.180249214172363	-2.25906562805176	2.02702140808105	-1.44715881347656	2.28269481658936	0.0133886337280273	-2.13646411895752	1.28037643432617
1089	XP_011260293.1;E2ALF0		1.33251	0.202	1.6769	0.595308	tr|E2ALF0|E2ALF0_CAMFO Ribosomal protein L15 OS=Camponotus floridanus (Florida carpenter ant) OX=104421 GN=EAG_16063 PE=3 SV=1	-2.92671489715576	-0.504978179931641	-1.65294647216797	0.88743782043457	-1.01015663146973	-6.40255689620972	-4.40854644775391	-7.53388404846191	-3.14415836334229	-4.1255989074707	-5.9159984588623	-3.43113899230957	-2.12345314025879	-7.62570095062256	-0.897296905517578	-4.63831424713135	-2.35700798034668	-2.04448509216309	-8.85585021972656	-4.09830760955811	-0.247247695922852	-5.50358390808105	-0.96186637878418	-3.16523742675781	-4.03196144104004	-5.71302270889282	-7.80917882919312	-0.851621627807617	-3.63790607452393	-6.87288475036621	0.125946044921875	-7.99134397506714	-4.77939796447754	-6.40987873077393	-6.71875095367432	-3.89298057556152	-3.33312797546387	-9.64553070068359	-2.49881267547607	-6.6883225440979	-10.2253484725952	-2.86127471923828
1095	XP_011261310.1;XP_011261309.1;XP_011261308.1;XP_011261307.1;XP_011261306.1;E2ANL8		1.51841	0.236609	1.37318	0.52572	|XP_011261308.1 calci	-1.17287921905518	0.507678985595703	2.03536987304688	1.12394523620605	-3.24089241027832	2.84603881835938	0.566488265991211	1.66393089294434	-0.521096229553223	0.811241149902344	-1.25498962402344	-5.33397674560547	-1.09995269775391	0.235176086425781	-1.03583526611328	1.54084491729736	1.81036186218262	-0.87336540222168	-0.0148983001708984	-1.10401821136475	0.457267761230469	-0.262815475463867	0.556306838989258	0.965049743652344	0.58587646484375	-7.69534158706665	0.410684585571289	-2.76055908203125	-0.568211555480957	-0.0652980804443359	-2.28632164001465	-3.66584777832031	-0.904541015625	-1.09238529205322	-2.68446636199951	-1.91701316833496	-0.436172485351563	0.903047561645508	-3.61524295806885	-4.1010217666626	0.26993465423584	-1.74978828430176
1100	XP_011261898.2		0.276546	0.651815	-0.685364	-0.222562	|XP_011261898.2 alpha-glucosidase [Camponotus floridanus]	-2.99153804779053	-4.79147529602051	1.60663032531738	-3.18185234069824	2.74602890014648	-7.37371349334717	3.13732147216797	-6.86933469772339	3.85528659820557	-2.06537437438965	-2.71612548828125	-1.33916854858398	-3.7944507598877	-5.43045902252197	-3.40171241760254	-9.0367603302002	-5.7224440574646	-4.3076114654541	3.7353572845459	-3.99240016937256	-2.6310920715332	-3.03072738647461	-4.11872673034668	-3.19437217712402	-6.43179273605347	-7.91613245010376	-4.72817325592041	3.90186882019043	-3.39417362213135	-3.91294288635254	-1.72229194641113	-7.95389175415039	-2.28322792053223	-2.16763591766357	-1.9401159286499	-3.46881294250488	1.50757789611816	1.57325172424316	4.83066654205322	1.95974254608154	-2.82561016082764	-0.146551132202148
1109	XP_025263304.1;XP_011263078.2		2.70373	0.0728571	-2.13613	-0.807215	|XP_011263078.2 alpha-amylase 1 isoform X1 [Camponotus floridanus]	3.7878885269165	5.48144721984863	2.41616249084473	3.41719245910645	5.66687202453613	1.47841453552246	7.31206512451172	2.17364501953125	6.45836734771729	8.36081886291504	6.6758975982666	2.53691482543945	5.59186935424805	8.3856143951416	3.00198554992676	8.36027431488037	8.76889610290527	7.39943695068359	3.14888381958008	6.84669399261475	4.33784675598145	8.91523742675781	7.42344093322754	6.98271179199219	8.54005813598633	8.4748363494873	8.81001663208008	4.58699417114258	8.43854236602783	9.62479591369629	4.5561408996582	8.77214622497559	9.02502822875977	9.0522928237915	8.10912799835205	8.64338874816895	6.89350509643555	7.76762008666992	3.69714641571045	9.35746669769287	7.961745262146	6.08225250244141
1121	XP_011264019.1;E2AU75		0.924355	0.410848	1.03688	0.391094	tr|E2AU75|E2AU75_CAMFO Myosin_tail_1 domain-containing protein OS=Camponotus floridanus (Florida carpenter ant) OX=104421 GN=EAG_00727 PE=4 SV=1	-0.605517387390137	0.915327072143555	-0.126810073852539	1.78043746948242	-3.6157341003418	0.997926712036133	-1.65330123901367	-0.439094543457031	-6.52055549621582	-2.16104316711426	-2.21907806396484	-5.10548973083496	0.76251220703125	-0.388999938964844	-2.17985343933105	0.107455253601074	0.417631149291992	-2.01445960998535	1.68891716003418	0.071925163269043	2.05988502502441	-2.09458351135254	-2.42983055114746	-0.16899299621582	-0.403980255126953	-3.8582935333252	-1.66559600830078	0.784090042114258	-1.18428897857666	-1.96031188964844	-0.317436218261719	-7.48344612121582	-2.96196746826172	-0.889491081237793	-3.3170919418335	-1.15619659423828	-1.95380973815918	-1.30801963806152	-4.9022741317749	-5.42517948150635	-1.65339756011963	-0.703237533569336
1125	XP_011264385.1		0.146797	0.874797	0.250362	0.0935441	|XP_011264385.1 multidrug resistance-associated protein 1 isoform X3 [Camponotus floridanus]	-2.62233829498291	-1.01655197143555	-1.94588851928711	-4.84661102294922	-1.83929252624512	-6.98944759368896	-2.43232536315918	-2.87053108215332	-8.60999202728271	-2.91582489013672	-4.48007965087891	-5.00622940063477	-2.78558540344238	-7.5890645980835	-4.19445037841797	-2.96084880828857	-3.22459983825684	-3.16399192810059	-6.41460657119751	-4.25297260284424	-2.06164932250977	-6.58266448974609	1.2895679473877	-3.7681999206543	-2.39758110046387	-10.0066232681274	-8.89247894287109	-3.07998466491699	-3.82208156585693	-3.72563171386719	-4.34453773498535	-4.47563362121582	-4.90267562866211	-3.63010120391846	-4.55503177642822	-0.956550598144531	-3.84836578369141	-2.71118354797363	-1.75960826873779	-4.0901403427124	-3.7311429977417	-2.40384674072266
1127	XP_019884712.1;XP_011264422.1		0.578819	0.42062	1.1247	0.375832	|XP_011264422.1 annexin B9-like isoform X1 [Camponotus floridanus]	0.683842658996582	0.0987930297851563	-1.98376274108887	1.55527496337891	-2.0334415435791	-0.0915641784667969	-1.67720603942871	-1.72988510131836	-9.97790241241455	-8.94534969329834	-1.26556777954102	-1.24458885192871	0.174617767333984	-1.03193092346191	-1.84829902648926	-3.89465618133545	-0.649736404418945	-2.23507690429688	-5.81343984603882	-0.394652366638184	1.18418312072754	-3.07585906982422	-3.14274406433105	-0.0430755615234375	-1.26053237915039	-5.54917144775391	-1.40288352966309	1.84561347961426	-0.97206974029541	-5.88984823226929	1.94871520996094	-7.99467849731445	-3.64740180969238	-9.83452224731445	-3.13173389434814	-3.55065536499023	-0.811264038085938	-4.82517433166504	0.442805290222168	-7.83213996887207	-9.28231716156006	0.787893295288086
1130	XP_011264740.1;E2AVJ5		2.9033	0.0653333	2.21019	0.837988	|XP_011264740.1 transferrin [Camponotus floridanus]	-2.31397151947021	-0.883686065673828	1.64080047607422	2.62165260314941	-0.43353271484375	-3.16720771789551	0.350231170654297	0.702486038208008	-1.60799503326416	0.374383926391602	1.3443431854248	2.74150657653809	-1.64131164550781	-1.84137153625488	2.95508193969727	-0.899598121643066	-0.690866470336914	-0.928739547729492	0.923833847045898	-1.14023494720459	-1.71453094482422	-0.395284652709961	-1.72045135498047	0.945283889770508	-1.84448623657227	-1.39703559875488	-3.48141288757324	-3.19859886169434	0.0926408767700195	-2.99217414855957	-4.03428077697754	-2.89784812927246	-1.27030944824219	-3.94532299041748	-2.72521305084229	-3.25937652587891	-1.84275817871094	-7.98096370697021	2.37452220916748	-0.372586250305176	-7.64471578598022	-2.63276672363281
1144	XP_011266004.2		0.475594	0.448405	-1.07647	-0.346991	|XP_011266004.2 venom serine carboxypeptidase-like [Camponotus floridanus]	0.0646276473999023	-1.27341651916504	-0.236316680908203	-3.6258430480957	1.57571220397949	-1.24876022338867	1.12545776367188	-2.69748497009277	5.57250881195068	4.35453033447266	2.88982582092285	-2.4645881652832	3.3971996307373	2.9887523651123	-7.25692844390869	3.76121425628662	2.60176467895508	4.08766174316406	1.53623580932617	3.48742771148682	-0.779150009155273	1.01261329650879	2.33575248718262	5.60453796386719	3.64512062072754	6.57679748535156	2.60406684875488	1.30759620666504	5.4164400100708	-7.77758407592773	-3.80336570739746	3.4499340057373	4.41787338256836	4.60776996612549	4.27787685394287	3.64009094238281	3.41128158569336	3.81306838989258	0.078608512878418	-8.62415504455566	2.82665920257568	0.743535995483398
1145	XP_011266010.1;E2AY02		1.12878	0.432986	-0.915812	-0.366309	tr|E2AY02|E2AY02_CAMFO Carboxypeptidase OS=Camponotus floridanus (Florida carpenter ant) OX=104421 GN=EAG_12710 PE=3 SV=1	6.33431720733643	6.43313789367676	7.49912261962891	3.08539962768555	6.17927932739258	8.17215728759766	7.61745643615723	4.93413734436035	8.11358737945557	7.67779731750488	6.77455902099609	3.65456008911133	5.35158538818359	8.12689208984375	3.21819686889648	7.57583522796631	8.58258819580078	6.84257698059082	7.78421783447266	7.18434810638428	6.65731620788574	8.09739685058594	7.86286354064941	7.23344230651855	9.39765167236328	8.96221923828125	8.2033805847168	4.4625129699707	8.6989107131958	9.29368591308594	4.76009941101074	9.17712020874023	7.69225692749023	9.26913928985596	7.82182216644287	8.37776756286621	6.46228790283203	7.4605770111084	4.04203319549561	8.57937717437744	8.25255298614502	5.8431282043457
1146	XP_011266069.1;E2AY28		0.159275	0.897101	-0.187803	-0.0759616	tr|E2AY28|E2AY28_CAMFO Uncharacterized protein OS=Camponotus floridanus (Florida carpenter ant) OX=104421 GN=EAG_05928 PE=4 SV=1	8.23470592498779	9.05182456970215	10.1822166442871	9.89837646484375	9.76953125	11.9288902282715	10.8043270111084	12.5620231628418	10.9858846664429	10.9758358001709	8.48525619506836	5.6688404083252	8.34191513061523	11.6156463623047	10.1555595397949	10.5658292770386	12.2434825897217	9.96103096008301	10.4186153411865	9.69088649749756	9.2332878112793	11.4999732971191	9.60770988464355	10.0458297729492	12.2086887359619	10.782356262207	11.1635303497314	6.75748062133789	10.8845720291138	12.1102199554443	9.3602294921875	11.2084884643555	10.7568206787109	11.4403772354126	9.92589855194092	10.8659267425537	8.86879539489746	10.7422332763672	6.79724025726318	11.0960474014282	11.1587362289429	8.08710861206055
1148	XP_011266190.1;E2AYB4		0.730113	0.408687	1.12646	0.39695	tr|E2AYB4|E2AYB4_CAMFO Vitellogenin domain-containing protein OS=Camponotus floridanus (Florida carpenter ant) OX=104421 GN=EAG_04079 PE=4 SV=1	-7.00778579711914	-1.74182510375977	-2.47310256958008	0.287105560302734	-5.16122055053711	-6.4991717338562	-2.02926635742188	-1.85661125183105	-6.04411649703979	-0.990179061889648	-2.24001121520996	0.0794544219970703	-6.71801376342773	-3.93987846374512	-1.83853530883789	0.266310691833496	-1.788818359375	-3.39664649963379	-5.0067138671875	-7.0782995223999	-3.1921443939209	-2.45298385620117	-5.71539878845215	-1.65311241149902	-1.87052536010742	-11.247386932373	-2.48546409606934	-4.86482429504395	-5.55607128143311	-2.60657119750977	-8.16037464141846	-9.39727783203125	-2.57966995239258	-1.97494792938232	-2.96176624298096	-4.99783706665039	-3.28073883056641	-2.15633964538574	0.154192924499512	-1.45738124847412	-6.51998567581177	-7.7237606048584
1152	XP_011266630.1;E2AZ60		0.104402	0.919294	0.158129	0.0613024	tr|E2AZ60|E2AZ60_CAMFO Peptidase A1 domain-containing protein OS=Camponotus floridanus (Florida carpenter ant) OX=104421 GN=EAG_08758 PE=3 SV=1	4.72074794769287	6.6919994354248	7.64037704467773	7.19521903991699	7.43206405639648	8.44198608398438	7.30986404418945	10.1342849731445	8.49810314178467	8.7546215057373	6.49143028259277	1.63104057312012	4.61901664733887	9.30851554870605	8.78684234619141	8.90273571014404	10.213041305542	7.03474617004395	7.27203941345215	6.60215473175049	6.95477485656738	8.63244247436523	7.77309799194336	7.05838012695313	9.36017608642578	7.31420135498047	8.09934043884277	2.85953330993652	7.56666088104248	9.23349380493164	6.11239624023438	8.15949249267578	8.08015632629395	9.13912296295166	7.09661960601807	7.96055030822754	5.51107025146484	7.73190689086914	2.81138324737549	9.47634601593018	8.05897426605225	5.63468170166016
1154	XP_011267011.2		0.423038	0.476241	1.03629	0.327773	|XP_011267011.2 venom acid phosphatase Acph-1 [Camponotus floridanus]	0.0100545883178711	-0.455587387084961	-0.738601684570313	0.114494323730469	3.71189880371094	4.3023681640625	4.21761512756348	-2.38768005371094	3.91758632659912	5.10498237609863	3.90632820129395	0.861688613891602	3.22414970397949	4.74242782592773	-1.59696388244629	4.02539157867432	6.22121429443359	2.77537727355957	4.57626724243164	1.53918361663818	2.21643257141113	6.48344421386719	1.58447456359863	4.71472358703613	6.94729042053223	4.60820007324219	-5.93730783462524	1.75163269042969	2.83965015411377	7.48436164855957	-1.24761581420898	5.46562767028809	5.7057991027832	3.21933460235596	2.92552661895752	6.55892181396484	-7.409339427948	3.9141788482666	0.234076499938965	-7.21565532684326	-2.34414196014404	-6.09216928482056
1155	XP_011267122.2;XP_011267116.2;XP_011267109.2;XP_011267102.2;XP_011267093.2;XP_011267131.3;E1ZYU8		0.2468	0.881191	-0.228256	-0.0953058	|XP_011267102.2 glucosylceramidase isoform X2 [Cam	0.102267265319824	1.68842506408691	2.94338226318359	0.27752685546875	1.99216461181641	3.05685615539551	1.25119781494141	2.22175979614258	1.30820751190186	2.13340187072754	0.644454956054688	-1.70907020568848	0.71763801574707	1.96200561523438	1.28104209899902	2.72482395172119	4.12161636352539	1.64179801940918	1.20675277709961	1.82289600372314	2.64198684692383	1.78904914855957	1.74662399291992	1.10106086730957	3.40852355957031	0.463521957397461	3.34074401855469	-0.265527725219727	2.55525493621826	3.86450386047363	0.123062133789063	2.87976264953613	2.23556709289551	2.42843532562256	1.69133281707764	1.1497917175293	1.65814590454102	3.31336212158203	-0.763297080993652	3.69948863983154	0.673991203308105	0.690166473388672
1163	XP_011267533.1;XP_011267532.1;XP_011267531.1;E2B153		0.748652	0.642082	0.596107	0.244772	|XP_011267531.1 actin-5, muscle-specific [Camponotus floridanus]	2.29397869110107	3.35821342468262	3.89039039611816	3.76693344116211	3.35374450683594	5.94680786132813	3.74392509460449	1.98578453063965	1.09272289276123	2.74426460266113	3.83827209472656	0.289213180541992	2.20678329467773	1.55222129821777	3.34133720397949	2.82971477508545	2.75012969970703	1.12201118469238	3.75980186462402	1.66821575164795	2.74810028076172	1.1258716583252	2.49020195007324	2.26874732971191	3.267822265625	1.51114463806152	2.9094066619873	3.44263076782227	4.73638439178467	2.9333553314209	1.32406044006348	-1.896240234375	0	-0.199795722961426	0.83582592010498	1.65728759765625	2.9660530090332	1.54968643188477	3.72828006744385	2.09147930145264	2.505934715271	1.99403953552246
1174	XP_011268594.2		1.7891	0.117684	-2.02731	-0.721767	|XP_011268594.2 beta-galactosidase [Camponotus floridanus]	-0.957009315490723	-1.20005226135254	-2.1915454864502	-3.91225051879883	-5.04145240783691	0.233945846557617	-2.00761413574219	-1.42087173461914	-4.30967617034912	1.75675964355469	3.14336013793945	2.74298095703125	0.418336868286133	-9.55577850341797	-0.797149658203125	-0.405154228210449	-7.88511037826538	0.968435287475586	2.12502288818359	2.50082683563232	-2.01233863830566	-6.57024049758911	-1.3163013458252	1.38547897338867	1.25758934020996	2.95055198669434	0.968986511230469	1.95940780639648	1.93116664886475	-0.422588348388672	-0.0514183044433594	-0.746881484985352	1.23299598693848	-2.32887363433838	-0.000266075134277344	0.784208297729492	2.10848236083984	0.351240158081055	0.974610328674316	0.24376392364502	-1.77140712738037	-0.471645355224609
1181	XP_011269026.3;E2A0U6		0.329236	0.73725	-0.412378	-0.160856	tr|E2A0U6|E2A0U6_CAMFO N-acetylmuramoyl-L-alanine amidase OS=Camponotus floridanus (Florida carpenter ant) OX=104421 GN=EAG_11291 PE=4 SV=1	-3.89416980743408	-4.81494331359863	-3.85070037841797	-5.97516632080078	-5.64368772506714	-0.464712142944336	-7.88846302032471	-4.45949935913086	-4.25741863250732	-2.58900260925293	-2.63247680664063	-6.05296611785889	-7.3642749786377	-4.61522483825684	-4.81233215332031	-3.38488674163818	-2.83831119537354	-5.10206985473633	-7.3242359161377	-4.28649806976318	-6.3577880859375	-7.75441026687622	-2.65469741821289	-6.94673013687134	-3.2642993927002	-3.25119972229004	-2.61127853393555	-3.27701187133789	-3.73106670379639	-3.88484764099121	-4.65374374389648	-5.75417900085449	-6.98989009857178	-2.76725482940674	-2.07810497283936	-2.83925247192383	-7.78452110290527	-5.30328178405762	-1.17510318756104	-4.90308856964111	-6.53191471099854	-4.27008819580078
1190	XP_011269819.1;E2A2D1		0.326661	0.651402	0.649804	0.224551	tr|E2A2D1|E2A2D1_CAMFO Ras-related protein Rab-1A OS=Camponotus floridanus (Florida carpenter ant) OX=104421 GN=EAG_12529 PE=4 SV=1	-2.59583759307861	-0.76298713684082	-0.827880859375	-0.357631683349609	-3.36549758911133	-7.18042182922363	-6.15827941894531	-7.03141784667969	-6.62368297576904	-2.68480110168457	-1.90922927856445	-4.19119644165039	-0.743007659912109	-3.06561088562012	-0.854148864746094	-1.22979831695557	-9.32310771942139	-3.55721282958984	-5.5003547668457	-1.85182857513428	-1.54669952392578	-7.36353445053101	0.331005096435547	-0.980329513549805	-2.27298164367676	-10.4419593811035	-2.42897796630859	-2.45956039428711	-0.908835411071777	-8.05450630187988	-2.86301612854004	-8.70462417602539	-5.27219295501709	-7.74197244644165	-3.22252941131592	-2.55710601806641	-3.22715187072754	-7.4934458732605	-1.24573612213135	-7.7331109046936	-0.906954765319824	-1.78422164916992
1193	XP_019882311.2;E2A631		0.15965	0.901197	-0.195323	-0.0784352	tr|E2A631|E2A631_CAMFO Ribonuclease Oy OS=Camponotus floridanus (Florida carpenter ant) OX=104421 GN=EAG_06245 PE=3 SV=1	4.40988445281982	5.02445411682129	6.73192596435547	5.36112594604492	5.28753280639648	8.56342697143555	6.12314224243164	7.53240013122559	6.51498699188232	6.58579635620117	4.41992378234863	1.18582725524902	3.93155670166016	6.98768615722656	6.76006698608398	6.16466999053955	7.93513298034668	5.23753356933594	6.60289573669434	5.78538799285889	5.78463745117188	6.68901634216309	5.67084884643555	5.54947471618652	7.93054389953613	5.96680641174316	7.87407875061035	2.27983474731445	7.20962810516357	8.03674697875977	5.4003849029541	6.93918037414551	6.48565864562988	7.06765270233154	6.16186428070068	5.69038200378418	4.74571418762207	6.86962127685547	1.82044124603271	7.36056423187256	6.78232288360596	4.59536361694336
1194	XP_019882348.2;E2A6E1		0.631499	0.370847	-1.30671	-0.424136	tr|E2A6E1|E2A6E1_CAMFO Protein G12 OS=Camponotus floridanus (Florida carpenter ant) OX=104421 GN=EAG_09916 PE=4 SV=1	-0.348361015319824	-6.07245635986328	0.432319641113281	-5.76447296142578	-0.207691192626953	-8.33856105804443	-4.03086853027344	-7.86735963821411	-8.27713871002197	-1.6590518951416	-6.98882246017456	-0.332557678222656	0.288063049316406	-1.261474609375	-6.93356847763062	-2.88964748382568	-6.51498746871948	0.621295928955078	-3.27584075927734	-7.74188137054443	-0.72557258605957	-2.0992431640625	-5.23838233947754	-2.00257301330566	-3.01746940612793	-6.37460136413574	-2.01596260070801	5.27448463439941	-0.334771156311035	-6.30846548080444	1.81715202331543	-7.59900140762329	-5.76528739929199	-2.0214319229126	-3.870924949646	-3.29839706420898	3.35732078552246	-3.40701103210449	1.48480892181396	-3.28040218353271	-10.441385269165	-1.86506652832031
1195	XP_025262946.1;XP_019882428.1;XP_019882427.1;XP_019882425.1;XP_019882423.1;XP_019882399.1;XP_019882376.1;XP_025262953.1;XP_025262951.1;XP_025262949.1;XP_025262945.1;XP_025262944.1;XP_025262943.1;XP_019882419.1;XP_019882418.1;XP_019882409.1;XP_019882401.1;XP_019882400.1;XP_019882398.1;XP_019882396.1;XP_019882393.1;XP_019882391.1;XP_019882383.1;XP_019882380.1;XP_019882377.1;XP_019882375.1;XP_025262…		0.325929	0.709058	-0.486709	-0.182242	|XP_019882425.1 myosin	0.375481605529785	1.28927803039551	0.912458419799805	2.06137275695801	-0.583076477050781	0	1.09169006347656	-5.38537120819092	-1.41689395904541	-2.38564491271973	-0.618825912475586	-4.96245574951172	1.77405166625977	-0.466440200805664	-4.42317962646484	1.75086498260498	-0.0644016265869141	-0.241472244262695	2.91375732421875	-1.00880527496338	1.42088508605957	-1.73053359985352	-0.367345809936523	0.941604614257813	1.62267875671387	-4.36729621887207	0.630495071411133	0.521265029907227	1.2875509262085	0.0526256561279297	-1.47478294372559	-4.80947685241699	0.425497055053711	2.79148960113525	1.12495899200439	1.3537540435791	0.400091171264648	2.05581092834473	-3.20157527923584	-2.48435306549072	0.680319786071777	0.612545013427734
1198	XP_019882595.1;E2A8M9		0.389861	0.522622	0.923431	0.297553	tr|E2A8M9|E2A8M9_CAMFO Odorant receptor OS=Camponotus floridanus (Florida carpenter ant) OX=104421 GN=EAG_14019 PE=3 SV=1	-0.0954122543334961	1.87521743774414	6.15353012084961	0.979959487915039	-0.0378570556640625	-7.35449838638306	2.53637504577637	-6.58441495895386	0.692597389221191	4.11874198913574	4.99262809753418	2.78548431396484	2.07701110839844	-0.63117790222168	4.99150276184082	2.04629230499268	1.93220329284668	3.2852783203125	-0.821432113647461	4.74330425262451	0.600351333618164	-0.890338897705078	3.58785629272461	2.62458229064941	4.14467620849609	4.93603515625	4.34104919433594	-0.00537681579589844	3.87703609466553	3.15044212341309	-0.540737152099609	-1.27436065673828	0.106529235839844	-0.344542503356934	0.785819053649902	0	2.24592590332031	1.57948112487793	0.630846977233887	-9.21398830413818	-10.3755502700806	0.439105987548828
1200	XP_025266198.1;XP_025266197.1;XP_025266196.1;XP_025266195.1;XP_019882760.2		0.415017	0.673027	-0.543068	-0.207445	|XP_025266195.	-7.1194372177124	-4.57942581176758	-0.337825775146484	-4.50749206542969	-6.31624031066895	-4.06473350524902	-7.37221479415894	-1.66073799133301	-8.67861461639404	-3.93197441101074	-5.84447479248047	-5.72744941711426	-6.17684364318848	-4.1580867767334	-4.1516284942627	-3.65691661834717	-7.97321367263794	-5.37696838378906	-9.1897497177124	-5.51722621917725	-3.87968254089355	-7.98160457611084	-3.88902282714844	-7.37188768386841	-2.09133911132813	-4.0357666015625	-2.88960838317871	-5.45609092712402	-4.7893648147583	-4.09438705444336	-9.1964225769043	-5.10968780517578	-4.75406455993652	-2.6448392868042	-5.89196681976318	-3.55218124389648	-6.95688438415527	-4.32537460327148	-7.04246234893799	-2.13719081878662	-3.92018413543701	-5.25066566467285
1208	XP_019883740.2;E2AKK9		0.105139	0.870167	0.282397	0.0932524	tr|E2AKK9|E2AKK9_CAMFO Amidohydro-rel domain-containing protein OS=Camponotus floridanus (Florida carpenter ant) OX=104421 GN=EAG_14558 PE=4 SV=1	-0.0100545883178711	0.739944458007813	-4.43542861938477	0.425527572631836	-0.0281047821044922	-6.90363168716431	1.26270484924316	-8.43664264678955	0.303309440612793	-5.91995668411255	-0.81684684753418	-2.82369804382324	0.585485458374023	-5.99081659317017	-6.55694580078125	1.32746982574463	-0.295886993408203	-1.12361717224121	-1.6245059967041	-1.65526866912842	1.39277458190918	0.333257675170898	-1.53968811035156	-0.549890518188477	-2.37423133850098	0.127597808837891	-2.86474609375	1.34167098999023	-0.737915992736816	2.81596374511719	0.0786380767822266	2.63558578491211	-8.985107421875	2.6608190536499	-1.6808443069458	-9.34513854980469	-1.84309005737305	-4.47989845275879	-4.90649890899658	-6.42159175872803	-6.79945278167725	1.47757911682129
1209	XP_019884420.2		1.54494	0.231574	-1.36791	-0.525607	|XP_019884420.2 alpha-amylase [Camponotus floridanus]	-0.0400362014770508	-0.598526000976563	-0.89593505859375	-2.47784805297852	-1.57109642028809	3.02535438537598	0.838884353637695	-0.865690231323242	1.04681301116943	4.14211273193359	2.84682464599609	1.30073356628418	0.654478073120117	2.16522598266602	0.609655380249023	4.73727893829346	2.61219787597656	1.89707946777344	-2.13810539245605	3.10758495330811	-0.225498199462891	5.84433746337891	1.75378608703613	1.14975166320801	3.59551429748535	2.16508483886719	4.9013614654541	1.15779876708984	4.77999401092529	4.58198165893555	0.825637817382813	2.98215484619141	3.02520942687988	3.04191303253174	3.06500339508057	3.23128509521484	1.45310592651367	1.46231651306152	-1.33465671539307	5.23375034332275	2.04466724395752	0.496206283569336
1210	XP_019884788.1;XP_019884801.1;XP_019884800.1;XP_019884798.1;XP_011265227.1;XP_019884796.1;XP_019884794.1;XP_019884790.1;XP_019884789.1;XP_019884786.1;XP_019884785.1;XP_025267686.1;XP_019884802.1;XP_025267684.1;XP_019884792.1;XP_019884791.1;XP_019884787.1;XP_019884803.1;XP_025267682.1;XP_019884793.1;XP_025267685.1		0.832062	0.430919	0.969275	0.364928	|XP_019884800.1 ba	-4.74116802215576	-4.28337669372559	-6.95354890823364	-5.46392059326172	-7.58689594268799	-4.72127485275269	-9.23432064056396	-7.23210191726685	-2.26674175262451	-5.65224742889404	-5.33860969543457	-3.23918342590332	-2.3005256652832	-4.85623931884766	-3.46293830871582	-8.52049732208252	-7.66463422775269	-4.48201179504395	-6.76068305969238	-4.407790184021	-4.77840042114258	-5.16506576538086	-4.75361442565918	-4.30220603942871	-7.1130199432373	-6.25392150878906	-8.96656036376953	-2.04931449890137	-4.50727939605713	-7.05786800384521	-2.05856323242188	-9.1158447265625	-6.26950025558472	-11.191743850708	-8.0757532119751	-6.48908424377441	-3.78660774230957	-4.91531753540039	-5.63796901702881	-9.70851516723633	-7.37119770050049	-4.42836761474609
1216	XP_019885340.1;E1ZZ64;E1ZZ62		2.20956	0.12713	1.82273	0.692726	|XP_019885340.1 uncharacterized protein LOC109610529 [Camponotus floridanus]	-1.9442663192749	0.591327667236328	2.78119850158691	5.27871894836426	2.43568801879883	6.90280532836914	2.37949371337891	5.50706481933594	2.34282398223877	2.2987117767334	0.550235748291016	-3.48677635192871	-1.47687721252441	0.883047103881836	4.03605079650879	2.22691249847412	4.43685150146484	0.6737060546875	3.46956253051758	0.0879907608032227	1.88397026062012	4.73387718200684	2.09007835388184	1.61571311950684	2.17511367797852	0.649055480957031	2.68310165405273	-1.74942779541016	0.510560035705566	-0.551136016845703	0.62938117980957	-1.48599052429199	1.30149459838867	-0.910063743591309	-0.719592094421387	-1.10891342163086	0.882247924804688	1.30790519714355	-2.08804416656494	0.892718315124512	0.331999778747559	-0.964818954467773
1220	XP_025262039.1;XP_025262034.1;XP_025262032.1;XP_025262029.1;E2A1S2;E2AVK5		0.158581	0.876676	0.249473	0.0948622	|XP_0	-6.37486505508423	-1.71228790283203	-0.725923538208008	0.137176513671875	-1.89765930175781	-4.61389255523682	-1.572265625	-0.321212768554688	-0.456545829772949	0.325666427612305	-0.558515548706055	2.58329391479492	-3.50947380065918	-1.42241287231445	-0.0497703552246094	-1.20264720916748	-0.480195999145508	-2.64875411987305	-0.435359954833984	-1.91188526153564	-0.863107681274414	-2.01652526855469	-4.35534477233887	-1.72875785827637	-1.5506649017334	-9.72858142852783	-2.33941841125488	-1.07578086853027	0.230443000793457	-1.88212394714355	-1.07776260375977	-0.540058135986328	-1.95552062988281	0.128472328186035	-2.01400279998779	-2.67486953735352	-2.89313125610352	2.22360038757324	-1.04148769378662	-0.640233039855957	-2.17836856842041	-2.66082572937012
1222	XP_025262246.1		0.795265	0.548688	0.706875	0.283403	|XP_025262246.1 uncharacterized protein LOC105256493 [Camponotus floridanus]	5.57259464263916	3.7806453704834	6.10458946228027	4.96073341369629	4.63032341003418	8.05114936828613	5.08765983581543	6.84136199951172	1.60841846466064	6.06052589416504	5.33127212524414	1.58819389343262	3.59099769592285	8.33146476745605	4.2735652923584	4.48706150054932	5.2230396270752	4.0104923248291	5.68065452575684	4.84552097320557	5.64124870300293	4.62609672546387	6.13214492797852	4.88076400756836	4.92254066467285	4.16782188415527	6.33624267578125	0.440423965454102	6.41323947906494	5.19445610046387	3.35352325439453	4.75211524963379	4.11096572875977	5.17357158660889	5.83304309844971	3.50055313110352	4.12692642211914	4.72749519348145	1.15977954864502	5.33605861663818	5.61685276031494	1.83311462402344
1235	XP_025262735.1;XP_025262733.1		0.68672	0.471268	0.89561	0.332134	|XP_025262733.1 arginine kinase isoform X2 [Camponotus floridanus]	1.59347629547119	1.4116153717041	-0.0943946838378906	1.55389404296875	2.05338478088379	0.822574615478516	1.77969932556152	-1.65837097167969	-0.0670442581176758	-4.27506065368652	-0.812381744384766	-0.773439407348633	1.12241744995117	-1.88272476196289	-0.149501800537109	1.16692447662354	0.00520515441894531	-0.154268264770508	0.4068603515625	-0.735407829284668	1.14035415649414	-1.57448196411133	2.8253288269043	1.69351959228516	1.28487396240234	-8.52177238464355	-0.61918830871582	0.49781608581543	-0.57746410369873	-1.21907043457031	0.33624267578125	-8.54363632202148	-2.94229125976563	0.0491819381713867	0.729397773742676	-0.620492935180664	0.214817047119141	0.455846786499023	1.74583911895752	-0.205264091491699	-0.489045143127441	0.662734985351563
1236	XP_025262760.1;E2ATD2		1.72799	0.296357	1.14858	0.465187	|XP_025262760.1 uncharacterized protein LOC105255829 [Camponotus floridanus]	6.30711841583252	6.24575805664063	7.52128601074219	6.03555297851563	7.23457145690918	8.88409423828125	7.34187889099121	8.64575386047363	8.82974910736084	8.60021591186523	6.5810375213623	3.48129081726074	5.15423583984375	8.87242889404297	7.45158386230469	8.47784519195557	9.66543197631836	7.3093090057373	7.31496047973633	6.49485683441162	7.70050239562988	8.27908706665039	7.46153831481934	6.24994468688965	7.8082447052002	7.00675010681152	7.93166923522949	2.81642913818359	6.85119724273682	7.33303642272949	4.44074440002441	7.7781810760498	6.52315139770508	7.72837543487549	6.54350757598877	6.12580299377441	5.08949661254883	6.54125022888184	2.23961544036865	8.09874057769775	6.68503284454346	4.0368537902832
1246	XP_025263096.1;XP_025263073.1;XP_025263075.1;E2B003		1.85921	0.206778	-1.49118	-0.578033	tr|E2B003|E2B003_CAMFO Aamy domain-containing protein OS=Camponotus flor	5.72998332977295	8.00810241699219	8.5777473449707	5.75140953063965	9.03774452209473	8.54970169067383	9.67893218994141	5.46728324890137	10.0674352645874	11.3064708709717	9.07705497741699	5.37768745422363	6.98040771484375	10.2091484069824	7.94218444824219	10.3359327316284	11.3137054443359	10.0362911224365	8.80926513671875	9.67464351654053	8.25616645812988	10.7403450012207	9.77439308166504	8.94953918457031	12.5889949798584	11.6231079101563	11.8269290924072	6.86302185058594	9.59573841094971	12.2044200897217	7.92646408081055	11.6836471557617	11.6741828918457	12.3157968521118	9.3842077255249	11.5331134796143	7.67617225646973	10.0199775695801	6.0779333114624	12.2635011672974	10.7449522018433	8.67587280273438
1247	XP_025263076.1		0.199492	0.823022	-0.331044	-0.123273	|XP_025263076.1 maltase 1-like [Camponotus floridanus]	5.88216686248779	6.17356109619141	5.48735046386719	0.440658569335938	5.8713436126709	4.84649658203125	8.05171203613281	2.15599060058594	8.41939449310303	8.42513084411621	6.70223236083984	2.41138076782227	5.08490180969238	7.10979843139648	1.55134201049805	7.6840181350708	7.34745216369629	7.46427536010742	6.8395824432373	7.59512996673584	6.32066535949707	6.46551704406738	6.68037986755371	6.05984497070313	8.47678375244141	8.88655281066895	4.64491271972656	2.48248291015625	7.70765781402588	8.09517669677734	1.27228736877441	8.65340995788574	6.73482704162598	8.70324420928955	5.43157482147217	5.92345237731934	5.24825477600098	7.12186241149902	2.86516666412354	4.79337024688721	8.29123210906982	4.60786437988281
1248	XP_025263077.1		1.93024	0.207758	-1.51357	-0.588059	|XP_025263077.1 maltase 1-like [Camponotus floridanus]	3.64979648590088	5.59371185302734	5.33270072937012	2.35183906555176	5.46716117858887	4.79592132568359	6.75848770141602	1.50906181335449	6.13046169281006	7.64926910400391	6.12795448303223	1.83509063720703	4.52732276916504	6.87172317504883	3.53378295898438	7.08091640472412	7.69013786315918	6.60323333740234	6.05421257019043	7.20601749420166	5.16409683227539	7.02835273742676	6.35453987121582	6.30089378356934	9.52280235290527	7.73003578186035	8.14425468444824	3.58784103393555	7.01347637176514	8.9844970703125	3.6170711517334	8.9290657043457	7.99728202819824	9.04948902130127	6.15598011016846	8.16727256774902	4.9867057800293	7.06660842895508	2.93176555633545	7.88065052032471	7.66551113128662	5.33551406860352
1264	XP_025264147.1		0.488964	0.653396	0.584256	0.225955	|XP_025264147.1 uncharacterized protein LOC105250349 [Camponotus floridanus]	-8.32686519622803	-6.12196350097656	-6.58871936798096	-4.12055778503418	-7.3664608001709	-2.62578964233398	-8.51150989532471	-3.6927604675293	-9.85206413269043	-4.79741096496582	-5.8069953918457	-4.13222694396973	-5.50971031188965	-4.40955924987793	-1.81618499755859	-5.97490406036377	-3.18038940429688	-4.94679069519043	-8.56004905700684	-9.16062545776367	-6.58881759643555	-7.11373901367188	-5.61017227172852	-5.29638290405273	-7.31019878387451	-7.58240699768066	-1.91560935974121	-7.28271102905273	-6.62428951263428	-5.38225364685059	-6.20278739929199	-5.62395477294922	-7.93969535827637	-5.63306140899658	-8.94424533843994	-7.73042869567871	-8.49622344970703	-6.61471128463745	-5.17349147796631	-4.53343105316162	-7.29314804077148	-5.74629402160645
1273	XP_025264610.1		0.375384	0.662826	-0.593477	-0.21734	|XP_025264610.1 lysosomal aspartic protease isoform X1 [Camponotus floridanus]	4.3821439743042	5.7528076171875	5.89837646484375	1.77531814575195	3.0916576385498	7.85940361022949	7.28380966186523	10.2453365325928	8.70645236968994	7.34725761413574	5.61891746520996	1.67697525024414	3.62501907348633	8.78209686279297	7.83501815795898	8.04405689239502	9.6771240234375	7.25693702697754	5.2619571685791	7.34548664093018	5.32358360290527	3.85195541381836	7.54123115539551	6.27289390563965	8.46758651733398	7.67799186706543	4.1989631652832	0.445701599121094	7.05954265594482	9.37173461914063	4.81165885925293	9.6179141998291	7.12636375427246	10.169997215271	7.25486278533936	7.40548896789551	5.99770927429199	8.07463645935059	2.80941486358643	6.65114307403564	8.92660045623779	5.9073657989502
1274	XP_025264611.1		0.154362	0.851257	0.291366	0.105829	|XP_025264611.1 lysosomal aspartic protease isoform X2 [Camponotus floridanus]	7.06950855255127	7.4045295715332	4.92807197570801	7.00827407836914	7.63116455078125	10.0021057128906	9.27907180786133	10.9054889678955	10.199875831604	9.37281227111816	7.45515060424805	4.49699211120605	7.10655975341797	10.7600021362305	1.36741065979004	9.2686071395874	9.59685516357422	9.11304473876953	4.46831130981445	8.42995357513428	6.98535537719727	7.72219467163086	8.4277458190918	7.9707145690918	8.6878547668457	9.57144546508789	5.62674331665039	0.454729080200195	8.79497814178467	9.51937484741211	7.95601844787598	10.4732246398926	8.39291572570801	2.14469623565674	8.19443225860596	8.68896293640137	7.29958343505859	8.83744812011719	4.49548053741455	5.93532466888428	10.2882528305054	6.57882690429688
1275	XP_025264613.1		0.031298	0.958154	0.048588	0.0190284	|XP_025264613.1 lysosomal aspartic protease isoform X3 [Camponotus floridanus]	2.71143627166748	3.85684394836426	4.01049613952637	5.11868667602539	3.92210578918457	8.03178215026855	5.55261421203613	6.76491928100586	5.6068639755249	4.76844787597656	3.24796295166016	0.492759704589844	4.92507934570313	6.8414421081543	4.79730033874512	5.30091381072998	7.10508155822754	4.83371543884277	3.98871803283691	4.31402111053467	3.9858455657959	7.37599563598633	5.10971260070801	5.91121482849121	7.08334159851074	6.53817367553711	4.33951759338379	0.796340942382813	5.52688694000244	6.45523834228516	5.21866607666016	6.80554008483887	3.78332901000977	6.62986087799072	3.71610736846924	5.09708213806152	2.80751037597656	4.11249732971191	0.112460136413574	6.32737636566162	6.23944568634033	3.38772773742676
1276	XP_025264718.1		1.37646	0.186483	1.75596	0.619034	|XP_025264718.1 mediator of RNA polymerase II transcription subunit 12 [Camponotus floridanus]	-0.434985160827637	-0.645517349243164	0.144927978515625	3.20182609558105	-5.2712287902832	4.53020858764648	1.43364143371582	3.06302833557129	2.66045093536377	3.76851272583008	6.21294593811035	7.70026397705078	2.39902305603027	4.30385398864746	4.9869270324707	0.0541677474975586	4.09347343444824	-0.289764404296875	0.285137176513672	0.282118797302246	-0.0220069885253906	4.43265342712402	-0.650476455688477	1.41515159606934	0	-2.13264465332031	0.918523788452148	-0.745569229125977	5.68326473236084	-1.25374984741211	-0.85090446472168	-2.32125854492188	-0.00444984436035156	0.121657371520996	3.69595813751221	-2.99786949157715	2.54958534240723	-0.895772933959961	3.67733860015869	-0.785006523132324	-2.96296405792236	4.33895874023438
1278	XP_025265121.1;E1ZWT6		0.492516	0.433387	-1.13216	-0.36186	|XP_025265121.1 serine protease 52 [Camponotus floridanus]	2.71604442596436	-1.92927932739258	-2.44277572631836	-3.40887451171875	1.23780250549316	-4.93354368209839	-1.80981826782227	-8.6811580657959	-3.81095409393311	-1.86288261413574	-8.39126300811768	0.0113983154296875	2.87966918945313	-8.24053573608398	-8.83195400238037	-2.74087429046631	-1.70037269592285	0.674331665039063	-3.25936317443848	1.25535106658936	-0.966291427612305	-1.3264331817627	-3.59031867980957	-3.11512565612793	-1.65176010131836	-7.35106086730957	-1.61971282958984	4.56731605529785	-3.50204181671143	-10.4454898834229	1.90228271484375	-2.1774730682373	-3.32123565673828	-7.60400915145874	-2.64584064483643	0.222393035888672	3.70141983032227	1.34166717529297	3.98327159881592	0.394133567810059	-2.92000675201416	1.51329040527344
1280	XP_025265137.1;E2ABS8		1.29499	0.235429	-1.39218	-0.517239	tr|E2ABS8|E2ABS8_CAMFO Alpha-mann_mid domain-containing protein OS=Camponotus floridanus (Florida carpenter ant) OX=104421 GN=EAG_15547 PE=4 SV=1	-0.649031639099121	-3.33976364135742	-1.48067665100098	-3.80015182495117	-1.85957527160645	3.20895195007324	-3.7104549407959	-0.839838027954102	-8.44783115386963	-1.3425407409668	0.295770645141602	0.903999328613281	-0.682149887084961	-2.69601440429688	-2.51797294616699	-2.25753688812256	-0.159027099609375	-3.09757423400879	-4.78265190124512	-0.913208961486816	-3.25494003295898	-6.60900020599365	-4.79267883300781	-3.10623741149902	0.0361080169677734	-1.69548416137695	-1.01470756530762	2.60466575622559	-2.9379358291626	-0.937614440917969	-0.451351165771484	-3.19012451171875	0.473611831665039	-1.77493000030518	-1.08965969085693	-0.997642517089844	1.36999702453613	-1.03553199768066	3.77814197540283	-0.949755668640137	-3.65621662139893	-0.391672134399414
1282	XP_025265223.1;XP_025265222.1;XP_025265221.1		2.19465	0.0912	-2.13155	-0.777499	|XP_025265221.1 myosin-IB isoform X1 [Camponotus floridanus]	-6.8947114944458	-0.733623504638672	-1.83831405639648	-5.66938591003418	-1.71915245056152	-5.33847141265869	-1.89382553100586	-8.36987113952637	-7.05765008926392	-7.08061027526855	-4.44912338256836	-6.76743698120117	-3.05457305908203	-8.17834186553955	-9.12744808197021	-2.65037631988525	-4.01117324829102	-3.81999778747559	-9.90351676940918	-3.95724010467529	-2.78709602355957	-6.11583805084229	1.27264213562012	-3.83611488342285	-1.25811004638672	-5.60347747802734	-0.295116424560547	-1.70919990539551	-4.242751121521	-1.48991584777832	-4.06637382507324	-3.2860279083252	-4.55648231506348	-2.43752765655518	-2.52063083648682	-2.13833236694336	-2.84691047668457	-2.50263023376465	2.23506450653076	-2.94329738616943	-4.617112159729	-2.51235961914063
1291	XP_025265943.1;E2AGD3		0.19474	0.70026	-0.587694	-0.181264	tr|E2AGD3|E2AGD3_CAMFO Alpha-carbonic anhydrase domain-containing protein OS=Camponotus floridanus (Florida carpenter ant) OX=104421 GN=EAG_02852 PE=3 SV=1	2.87397480010986	-0.156719207763672	-0.217002868652344	0.847274780273438	2.53362274169922	-9.21594905853271	-0.196414947509766	-0.323554992675781	0.0711202621459961	-2.74779319763184	-0.94175910949707	-1.20849227905273	3.78152847290039	-9.96623134613037	-9.81906795501709	-8.98689651489258	0.100719451904297	-0.687473297119141	1.22740364074707	2.33819484710693	3.0866813659668	-9.17586135864258	-5.37242698669434	4.13825798034668	-1.48468780517578	-0.716953277587891	-0.0668220520019531	3.03439140319824	-2.08260059356689	-2.55079650878906	0	-1.8013801574707	-0.237287521362305	-7.51572704315186	1.97139835357666	1.51375961303711	3.35223579406738	-3.9499568939209	-6.86890316009521	-7.33608627319336	-4.05799388885498	1.21322441101074
1292	XP_025266319.1;E1ZXZ5;E2AC93		2.58914	0.1075	1.96407	0.752017	tr|E1ZXZ5|E1ZXZ5_CAMFO Arylphorin subunit alpha OS=Camponotus floridanus (Florida carpenter ant) OX=104421 GN=EAG_11874 PE=4 SV=1	0.97067928314209	1.79602432250977	3.99503326416016	1.90679168701172	3.84175872802734	6.4403018951416	3.54299736022949	4.69297409057617	3.71539783477783	5.81772232055664	6.25433540344238	6.70755767822266	1.28956413269043	4.57230377197266	7.38823699951172	2.499098777771	5.79742813110352	2.36542510986328	3.49878120422363	2.58373165130615	2.5982666015625	3.33590316772461	2.02702713012695	2.13266754150391	1.45224952697754	5.26263427734375	0.978891372680664	5.24463844299316	5.96162509918213	1.60931777954102	2.06088447570801	0.129024505615234	0.0480899810791016	-1.31227588653564	1.31239032745361	-0.0698223114013672	3.77688980102539	-0.273956298828125	4.83430194854736	1.00990390777588	-0.615914344787598	0.489763259887695
1300	XP_025267265.1;E1ZYQ6;E1ZYQ5		0.161735	0.796855	-0.419758	-0.138002	tr|E1ZYQ6|E1ZYQ6_CAMFO Peptidase S1 domain-containing protein OS=Camponotus floridanus (Florida carpenter ant) OX=104421 GN=EAG_08393 PE=3 SV=1	0.209048271179199	-1.72740936279297	-1.79836082458496	-2.84819030761719	0.0887126922607422	-8.26225566864014	-3.65315437316895	-8.82175731658936	-2.55286884307861	-2.11222648620605	-5.00308799743652	-5.37537002563477	0.261337280273438	-7.82010555267334	-8.42731285095215	-4.16965579986572	-10.8757095336914	0.581666946411133	-3.99858474731445	-0.26115894317627	-0.265256881713867	-1.2623348236084	-0.382659912109375	-2.26203536987305	-4.0057430267334	-2.47599220275879	-2.38615226745605	1.1881160736084	-2.84437084197998	-6.9843168258667	0.980270385742188	-7.47322940826416	-9.69793701171875	-9.88396739959717	-1.79598522186279	-1.92206192016602	1.21110153198242	-2.15422630310059	-0.112854957580566	-0.870438575744629	-6.27278661727905	0.142515182495117
1303	XP_025267301.1;E2B0F9;XP_025264883.1;XP_025264884.1;E1ZYR2		0.258869	0.701669	-0.488334	-0.17365	tr|E2B0F9|E2B0F9_CAMFO Lactase-phlorizin hydrolase OS=Camponotus floridanus (Florida carpenter ant) OX=104421 GN=EAG_08018 PE=3 SV=1;|XP_02526	-4.05222606658936	-3.42874336242676	-3.36461639404297	-5.74514579772949	-1.85454559326172	-1.23117065429688	1.10376739501953	-2.03052711486816	-0.37299633026123	1.12117576599121	1.96175384521484	1.44941329956055	-0.681922912597656	-2.21341323852539	-4.22583389282227	1.0454568862915	-1.32419013977051	1.0383129119873	-9.82561206817627	-1.14978122711182	-0.214223861694336	0.444957733154297	-0.884134292602539	-1.56813621520996	4.65024948120117	3.17698669433594	-0.645885467529297	-2.5901985168457	-0.653923988342285	-0.9827880859375	-4.0080623626709	-3.16457939147949	-0.624792098999023	-4.05174350738525	-2.88064670562744	-0.675323486328125	-1.14181137084961	1.3182430267334	-1.46324443817139	3.54013347625732	-5.05963230133057	-2.61776924133301
1316	XP_025268350.1;E2AGJ5;E2AGJ4;REV__XP_019883532.1;REV__E2AI05		0.604119	0.433195	1.02876	0.357282	tr|E2AGJ5|E2AGJ5_CAMFO Uncharacterized protein OS=Camponotus floridanus (Florida carpenter ant) OX=104421 GN=EAG_01782 PE=4 SV=1	-0.471316337585449	-2.75037002563477	-3.38947868347168	-4.65710830688477	-4.59164619445801	-2.43981552124023	-4.98371315002441	-5.98541641235352	-9.26424026489258	-2.71744728088379	-1.18939018249512	-2.07966423034668	-0.24365234375	-9.52663993835449	1.43362808227539	-3.41085338592529	-6.40111446380615	-6.11598587036133	-8.95005416870117	-1.11918163299561	-3.54442405700684	-7.33298635482788	-3.6564769744873	-4.66275596618652	-3.66851043701172	-10.0016775131226	-7.93385553359985	-3.68969917297363	-5.12839221954346	-2.93905639648438	-3.00834655761719	-7.72801494598389	-7.94159889221191	-6.19942092895508	-2.90046215057373	-8.09597015380859	-9.67648410797119	-2.74841117858887	-2.23927402496338	-2.67382526397705	-6.85297584533691	-3.67499351501465
1323	XP_025269114.1;XP_025269111.1;XP_025269110.1;XP_025269109.1;XP_025269112.1;XP_025269117.1;XP_025269116.1;XP_025269113.1;XP_025269115.1;E2ARB3;E2AEH5;E2AEH6		0.856184	0.494292	0.780689	0.310075	|XP_025269112.1 titin isoform X4	-3.98548221588135	-3.57455062866211	-6.4467248916626	-2.58813858032227	-5.44554138183594	-7.03014469146729	-5.99914932250977	-8.21004199981689	-4.77517414093018	-6.45589733123779	-4.7626953125	-6.84628868103027	-2.01316261291504	-3.3847827911377	-6.38589382171631	-5.35570049285889	-5.3454418182373	-4.06751441955566	-4.0242805480957	-4.30810642242432	-4.4259033203125	-5.53739452362061	-7.33374691009521	-4.69447135925293	-4.47500801086426	-10.0022344589233	-5.90763568878174	-5.10013580322266	-6.67360401153564	-6.87379932403564	-5.16421127319336	-7.47642135620117	-5.01089096069336	-5.95422840118408	-4.1498384475708	-4.7572078704834	-5.01049613952637	-5.63215065002441	-9.92828845977783	-8.72517585754395	-3.91307163238525	-4.17169570922852
1328	XP_025269163.1;E2AZ61		0.186397	0.881517	0.217917	0.0879322	|XP_025269163.1 uncharacterized protein LOC105257597 [Camponotus floridanus]	9.28978633880615	9.31234931945801	10.1243476867676	9.08538436889648	9.83947944641113	12.5434761047363	10.8099155426025	12.8450050354004	11.6919660568237	11.2414646148682	8.79671669006348	6.64719009399414	8.12540054321289	12.3580703735352	10.7230110168457	10.4421758651733	12.8905773162842	10.2159175872803	10.5572452545166	10.2244138717651	10.0127601623535	11.246696472168	10.2482242584229	9.98786544799805	11.8930988311768	11.0142860412598	11.2830066680908	6.38530349731445	10.566388130188	11.7388019561768	9.42067718505859	11.6613922119141	10.4533538818359	11.7463617324829	9.59892559051514	10.8068408966064	8.90926551818848	10.5095176696777	6.55547618865967	11.1790437698364	10.9736089706421	8.02142333984375
1330	XP_025269201.1;XP_025269204.1;XP_025269202.1;XP_025269214.1;XP_025269200.1;XP_025269199.1;XP_025269198.1;XP_025269197.1;XP_025269196.1;XP_025269195.1;XP_025269194.1;XP_025269193.1;XP_025269192.1;XP_025269191.1;XP_025269189.1;XP_025269188.1;XP_025269187.1;XP_025269186.1;XP_025269185.1;XP_025269184.1;XP_025269183.1;XP_025269182.1;XP_025269181.1;XP_025269180.1;XP_025269179.1;XP_025269178.1;XP_025269…		0.0748158	0.94445	-0.100974	-0.0403485	|XP_025269200.1 t	-2.246169090271	-1.02364730834961	-4.65519905090332	-0.523735046386719	-3.74018669128418	-2.03007507324219	-3.5488224029541	-1.85308074951172	-3.52736377716064	-3.2606258392334	-2.47810935974121	-6.35611152648926	-0.0657482147216797	-2.12202453613281	-5.42617225646973	-3.53242778778076	-0.257661819458008	-1.46036911010742	-1.09161376953125	-3.41761302947998	-1.81381988525391	-2.51301765441895	-4.27127647399902	-2.47660446166992	-0.445133209228516	-1.90617370605469	-0.94798469543457	-1.75090789794922	-4.681715965271	-2.65635871887207	-2.11440849304199	-7.27051687240601	-1.95580673217773	-1.99674892425537	-2.11868190765381	-0.619993209838867	-3.59195137023926	-3.15243339538574	-5.64088726043701	-1.32642841339111	-2.23206424713135	-2.11038589477539
1341	XP_025269479.1;E2AJL7		0.0486711	0.946764	0.0779088	0.0301856	|XP_025269479.1 uncharacterized protein LOC105252707 [Camponotus floridanus]	3.20518207550049	2.89165115356445	3.6522102355957	-0.598094940185547	3.50134658813477	5.17217445373535	4.54888343811035	-0.787952423095703	2.2604398727417	3.53470230102539	3.27408790588379	1.10841178894043	2.63920593261719	4.46640205383301	2.21442794799805	3.51493358612061	4.83983039855957	2.28449630737305	3.87684059143066	2.90249156951904	3.38359069824219	5.58427429199219	4.12537956237793	3.88390350341797	5.61206817626953	5.72138595581055	4.52727890014648	0.177215576171875	4.35422420501709	1.93153953552246	1.02862739562988	5.42088508605957	0.107858657836914	4.58139705657959	2.63583469390869	2.91654396057129	1.6711254119873	3.78481864929199	-1.05034923553467	5.42772197723389	4.52368259429932	-0.876615524291992
1347	XP_025269663.1;XP_025269662.1;XP_025269661.1;XP_025269660.1;E2A1Z0;XP_025269664.1		4.3763	0.0606154	-2.04941	-0.837553	|XP_025269661.1 putative glutamate synthase [NADPH] isoform X1 [Camponotus floridanus	-7.71582317352295	-5.57816314697266	-7.04425048828125	-5.8594913482666	-8.04215717315674	-6.97832012176514	-8.94031524658203	-4.76952075958252	-7.66332817077637	-7.66707229614258	-7.8584623336792	-9.17199897766113	-4.44651412963867	-8.36543941497803	-8.26975059509277	-8.55125045776367	-8.33730697631836	-7.75052547454834	-9.94916820526123	-5.76373958587646	-7.01185178756714	-3.26937675476074	-6.00685691833496	-4.70503234863281	-4.02652549743652	-5.1645622253418	-4.3810977935791	-5.70442390441895	-4.51007175445557	-3.68783760070801	-7.27252960205078	-3.81923675537109	-3.78656768798828	-3.87814807891846	-6.50814914703369	-5.04032325744629	-6.68287086486816	-5.96722221374512	-5.08749485015869	-3.5525484085083	-5.26092052459717	-5.91975593566895
1358	XP_025269812.1		1.90695	0.422567	0.900854	0.384269	|XP_025269812.1 serine protease inhibitor 3/4 isoform X12 [Camponotus floridanus]	3.34025096893311	4.01740264892578	6.92503356933594	3.8863639831543	5.44209098815918	3.37220001220703	5.88253402709961	5.48392295837402	6.12266445159912	6.4929084777832	6.55263900756836	3.65056800842285	4.43149948120117	4.42171478271484	7.67977142333984	5.35164928436279	6.46209144592285	5.25950241088867	6.30426216125488	5.221848487854	4.61919403076172	4.22947883605957	4.31779098510742	4.29597473144531	4.7941780090332	5.88501358032227	5.64354705810547	2.61347961425781	4.70452976226807	4.24702644348145	4.21232032775879	4.18943023681641	4.78855514526367	1.97482585906982	5.11667346954346	5.63863754272461	4.87687301635742	4.13257789611816	2.85377216339111	3.50118541717529	4.32485294342041	3.49956321716309
1361	XP_025270228.1;E2AA82;E2AA81		0.943343	0.402892	1.0517	0.3967	tr|E2AA82|E2AA82_CAMFO Fibrillin-2 OS=Camponotus floridanus (Florida carpenter ant) OX=104421 GN=EAG_11999 PE=4 SV=1	-8.9606466293335	-7.77301692962646	-3.57873916625977	-6.94138717651367	-9.2911205291748	-7.05189323425293	-5.18096733093262	-8.44698715209961	-9.5607385635376	-5.74886608123779	-3.40198135375977	-1.62872123718262	-4.83047103881836	-7.20549821853638	-2.70591163635254	-8.8104944229126	-6.50750064849854	-8.74036121368408	-6.50079441070557	-5.95149326324463	-11.8887510299683	-6.69495916366577	-2.95564270019531	-5.22418022155762	-7.89285802841187	-7.31282234191895	-5.43994235992432	-7.71732330322266	-6.97640514373779	-5.30046081542969	-8.49051570892334	-9.05553722381592	-7.97895669937134	-9.98565006256104	-6.54237270355225	-7.59253120422363	-5.94021606445313	-8.03812026977539	-9.9553747177124	-6.88303899765015	-6.64898490905762	-9.03005695343018
1365	XP_025270284.1;XP_025270283.1;E2ALT3		0.297949	0.696903	0.493049	0.180564	tr|E2ALT3|E2ALT3_CAMFO V-type proton ATPase subunit a OS=Camponotus floridanus (Florida carpenter an	-0.918854713439941	0.28826904296875	-0.154363632202148	-0.493759155273438	-0.453227996826172	-0.190135955810547	-0.468128204345703	3.23434257507324	-4.58414554595947	-1.23429679870605	-1.34559059143066	-2.57375907897949	-1.37861061096191	2.20354461669922	1.63687324523926	0.782122611999512	-1.35397148132324	-0.847562789916992	-10.535717010498	-0.942181587219238	-0.752021789550781	-1.5793571472168	1.9522705078125	-0.652990341186523	-0.110208511352539	-1.58778953552246	-0.345901489257813	-1.19991111755371	0.675976753234863	0.65898323059082	-2.36674690246582	-0.581613540649414	-1.57499885559082	-0.463259696960449	0.0652074813842773	-7.8350396156311	-2.56212043762207	-1.94422721862793	1.13416194915771	-4.60478496551514	-0.918599128723145	-1.31170845031738
1366	XP_025270286.1;E1ZYU0;XP_011261436.3		0.303262	0.705672	0.493639	0.181415	|XP_025270286.1 putative aminopeptidase-2 [Camponotus floridanus]	-7.26680135726929	-7.11893749237061	-7.06438541412354	-4.33890724182129	-5.67448997497559	-1.71209907531738	-4.11049842834473	-5.28802108764648	-3.9142427444458	-5.82433223724365	-8.56057453155518	-5.23075675964355	-6.80982971191406	-4.822021484375	-6.83444690704346	-5.64807224273682	-4.13585186004639	-6.03923034667969	-3.17204475402832	-6.82439804077148	-6.05129623413086	-5.0203685760498	-1.89216423034668	-6.88123750686646	-4.84047985076904	-5.25297546386719	-4.41415119171143	-1.03863906860352	-7.81091833114624	-12.9840755462646	-7.22804832458496	-5.57160329818726	-4.77493095397949	-7.23042583465576	-8.76888179779053	-6.59005928039551	-6.87754440307617	-4.74260711669922	1.38467502593994	-4.08206272125244	-6.92689800262451	-4.26183128356934
1367	XP_025270291.1;E2AAT8		0.932695	0.28288	-1.40223	-0.487712	tr|E2AAT8|E2AAT8_CAMFO ATP synthase subunit alpha, mitochondrial OS=Camponotus floridanus (Florida carpenter ant) OX=104421 GN=EAG_05896 PE=3 SV=1	-1.99974918365479	-4.85858917236328	-1.53107833862305	-1.56218147277832	-4.57411003112793	-1.03015327453613	-2.3964786529541	-9.31919956207275	-9.1635913848877	-9.66671752929688	-4.8707218170166	-4.72450637817383	-4.66297912597656	0.873035430908203	-5.06593132019043	-1.10875797271729	-9.7351016998291	-3.07019424438477	-4.80544471740723	-6.48772382736206	-1.87574768066406	-0.569726943969727	-2.15371704101563	-1.99578666687012	-4.66833686828613	-2.0450496673584	-2.22643280029297	-1.593994140625	0.463339805603027	-1.38523864746094	-2.27370452880859	-7.29611015319824	-4.68316459655762	-6.9794864654541	-3.16582012176514	-8.67275047302246	-0.442205429077148	-0.118606567382813	-1.88188648223877	-1.46877765655518	-3.26870632171631	-0.725225448608398
1368	XP_025270599.1;XP_025270598.1;E1ZY72		2.42578	0.0592727	-2.37845	-0.857463	tr|E1ZY72|E1ZY72_CAMFO Transket_pyr domain-containing protein OS=Camponotus floridanus (Florida ca	-2.25734615325928	-1.92874336242676	-6.11013793945313	-3.4680061340332	-7.06831455230713	-7.28135299682617	-6.53524303436279	-7.7203221321106	-7.53595447540283	-4.33017158508301	-4.1335620880127	-4.56167984008789	-3.92812538146973	-9.14905738830566	-3.20448112487793	-0.656599998474121	-0.777711868286133	-6.60719966888428	-6.63987731933594	-3.07299518585205	-2.37766456604004	-9.18963623046875	-9.43730640411377	-3.00851249694824	-0.730464935302734	-0.792634963989258	-1.3087158203125	-4.25933265686035	-2.3165807723999	-0.773529052734375	-6.84852027893066	-0.194272994995117	-0.23356819152832	-0.573952674865723	-3.2863302230835	-1.81832313537598	-2.77062606811523	-7.80566787719727	-3.28405284881592	-1.42309474945068	-7.68385314941406	-2.82156753540039
1369	XP_025270750.1;XP_025270749.1;XP_025270592.1;XP_025270591.1;E2AJP1;E2B077;E2AT48		0.124918	0.90996	0.172884	0.0680909	|XP_025270591.1 fatty acid synthase-like [Camponotus floridanus]	-5.06803035736084	-4.7821102142334	-5.55195236206055	-7.041672706604	-7.36379194259644	-4.46820068359375	-7.93172407150269	-5.56851768493652	-10.2259578704834	-4.57611465454102	-7.64348030090332	-5.80114364624023	-7.78240585327148	-3.74413299560547	-5.00842094421387	-4.02624416351318	-4.4625358581543	-6.76256465911865	-2.68316078186035	-6.91104221343994	-2.25696563720703	-8.60606956481934	-8.16302299499512	-5.3757495880127	-5.30262756347656	-6.99509716033936	-5.68489646911621	-7.06884574890137	-7.07668399810791	-4.46038818359375	-7.4524998664856	-3.54933547973633	-5.75352382659912	-6.91712713241577	-6.49349308013916	-6.7536039352417	-5.32917213439941	-7.10675239562988	-3.78807163238525	-3.61868190765381	-8.81444835662842	-7.48300743103027
[truncated: 1 more columns]

## Sheet: Field vs. lab Paired T
id	Protein IDs	Significant	-Log p-value	q-value	Difference	Test statistic	Fasta headers	FieldYoung2002	FieldYoung2007	FieldYoung2011	FieldYoung2012	FieldYoung2014	FieldYoung2016	FieldYoung2018	FieldYoung2020	FieldYoung2021	FieldYoung2022	FieldYoung2026	FieldYoung2027	FieldYoung2030	FieldYoung2033	LabYoung2002	LabYoung2007	LabYoung2011	LabYoung2012	LabYoung2014	LabYoung2016	LabYoung2018	LabYoung2020	LabYoung2021	LabYoung2022	LabYoung2026	LabYoung2027	LabYoung2030	LabYoung2033
96	E1ZWP8	+	1.84386	0.016	3.75769	1.12839	tr|E1ZWP8|E1ZWP8_CAMFO Peptidase A1 domain-containing protein OS=Camponotus floridanus (Florida carpenter ant) OX=104421 GN=EAG_09731 PE=3 SV=1	1.47855091094971	0.740769386291504	-4.62604713439941	1.03915214538574	2.43058967590332	0.15899658203125	1.59193325042725	0.937211036682129	2.5939245223999	0.335339546203613	0.983205795288086	1.5081844329834	4.13165855407715	-0.454593658447266	-2.44887828826904	-2.25838851928711	1.08265590667725	-10.1493844985962	-1.83883857727051	0.396631240844727	0.232714653015137	-9.1858549118042	-7.09421062469482	-0.67183780670166	-8.07956981658936	1.00154304504395	-1.8109245300293	1.065598487854
117	XP_019884091.1;E1ZXR7	+	1.86607	0.016	3.86355	1.15164	tr|E1ZXR7|E1ZXR7_CAMFO Zinc carboxypeptidase A 1 OS=Camponotus floridanus (Florida carpenter ant) OX=104421 GN=EAG_14623 PE=4 SV=1	-1.25008487701416	-3.81332111358643	3.24615287780762	-1.72837829589844	-3.88053512573242	2.71854400634766	0.281662940979004	-0.147686958312988	-1.52457714080811	1.1763277053833	3.02435302734375	1.40602874755859	-0.882978439331055	2.69292068481445	-0.626069068908691	-1.14357948303223	-2.04943561553955	1.63577079772949	-3.56731414794922	-1.7728328704834	-6.98631763458252	-8.70011615753174	-0.186516761779785	-7.01707649230957	-7.27546644210815	-6.13145685195923	-0.77655029296875	-8.17430305480957
181	XP_011268873.1;XP_011268841.1;XP_011264343.1;XP_011264339.1;E2AUU5;E2AUU1;E2A0I8;XP_011252166.1;E2A633;E2AGF1;XP_011257651.1;XP_011257652.1	+	2.24452	0.0212308	2.92763	1.01447	tr|E2AUU5|E2AUU5_CAMFO Histone H2A OS=Camponotus flo	-6.06075143814087	0.563130378723145	1.23824310302734	0.301656723022461	0.173059463500977	1.53821754455566	-1.03104877471924	1.76539134979248	-7.73316335678101	-2.10573673248291	-0.775327682495117	-0.740619659423828	1.8050537109375	-0.39954948425293	-7.62670373916626	-7.23981094360352	0.387652397155762	-1.24462127685547	-7.69154214859009	1.6776065826416	-1.73692607879639	-0.336267471313477	-7.36989068984985	-6.545325756073	0.347085952758789	-8.59062004089355	0.671466827392578	-7.15037250518799
222	XP_011269703.1;XP_011269702.1;E2A252;XP_011257369.1;XP_011257368.1;XP_011257367.1;E2AFT7	+	1.86375	0.0442353	-2.65124	-0.904671	tr|E2A252|E2A252_CAMFO Elongation factor 1-alpha OS=Camponotus floridanus (Florida carpenter ant) OX=104421 GN=EAG_13423 PE=3	-0.0751886367797852	3.89383792877197	-0.622564315795898	0.305812835693359	-0.967670440673828	2.75533103942871	-7.904212474823	4.75427722930908	-3.8181619644165	-3.1989221572876	-0.957178115844727	0.113565444946289	-0.381557464599609	-0.359960556030273	2.95281314849854	3.65543937683105	5.23020076751709	5.05380630493164	3.71481704711914	5.08148765563965	-1.25237369537354	0.74061393737793	2.74638080596924	2.96741199493408	-1.11358070373535	2.55795860290527	1.86494064331055	-3.54515933990479
288	E2A5R3;XP_011252033.1;XP_011252032.1;XP_011252034.1;XP_011252062.1	+	2.27137	0.0298667	2.73784	0.970706	tr|E2A5R3|E2A5R3_CAMFO TPR_REGION domain-containing protein OS=Camponotus floridanus (Florida carpenter ant) OX=104421 GN=EAG_13367 PE=4 SV=1;|XP_011252032.1 uncharacteri	-1.97539615631104	-2.78919506072998	-1.48315048217773	-0.954679489135742	-1.24249076843262	-1.46209526062012	-2.33520030975342	-4.01709651947021	-1.5778169631958	-2.04690647125244	-2.7898998260498	-3.09115028381348	-1.79754066467285	-1.02167510986328	-1.97798442840576	-1.89014434814453	-1.22914981842041	-1.81145668029785	-1.86856651306152	-5.04881191253662	-9.56148815155029	-9.62508392333984	-3.34178638458252	-2.24444103240967	-8.69001388549805	-8.29200553894043	-2.33498191833496	-8.99816989898682
354	XP_011253679.1;E2A8Y6	+	1.58672	0.0134545	3.97671	1.11023	tr|E2A8Y6|E2A8Y6_CAMFO Superoxide dismutase [Cu-Zn] OS=Camponotus floridanus (Florida carpenter ant) OX=104421 GN=EAG_07480 PE=3 SV=1	0.988011360168457	-1.37678813934326	3.65356826782227	3.47832679748535	4.09288024902344	4.8812198638916	-0.88105297088623	-2.50099849700928	-2.64583301544189	0.306550025939941	2.97674369812012	0	-9.70415019989014	3.10558891296387	-2.68323421478271	-7.41388320922852	-8.56826210021973	-0.691251754760742	-10.2465124130249	-3.85215950012207	0.449519157409668	-5.84177303314209	0.571742057800293	-1.62035655975342	-3.13622856140137	-1.80771064758301	-1.27524566650391	-3.18457889556885
532	E2AFL0;XP_011257234.1;XP_011257235.1	+	2.74337	0.008	3.58739	1.22922	tr|E2AFL0|E2AFL0_CAMFO Transaldolase OS=Camponotus floridanus (Florida carpenter ant) OX=104421 GN=EAG_02708 PE=3 SV=1;|XP_011257235.1 transaldolase isoform X2 [Camponotus floridanus]	1.12673282623291	-1.72787952423096	1.08327102661133	-1.40817070007324	-4.13281440734863	0.353715896606445	-2.28133296966553	-1.36056041717529	-2.35800075531006	-2.30080890655518	-0.450662612915039	-3.05975341796875	-1.54548835754395	0.173381805419922	-6.89035224914551	-9.08926010131836	-1.71132183074951	-3.83668518066406	-9.51164531707764	-8.90666484832764	-4.03771686553955	-1.8442440032959	-2.22887897491455	-4.93581867218018	-3.87043762207031	-7.52729988098145	1.87015533447266	-5.59159421920776
632	E2AK03;XP_025267872.1	+	1.96807	0.01	4.22329	1.23486	tr|E2AK03|E2AK03_CAMFO Protein CREG1 OS=Camponotus floridanus (Florida carpenter ant) OX=104421 GN=EAG_05018 PE=4 SV=1;|XP_025267872.1 protein CREG1 [Camponotus floridanus]	0.631766319274902	3.72139453887939	-1.67873001098633	1.46966361999512	0.778018951416016	-6.85092306137085	1.17270946502686	-1.6645975112915	-0.61118221282959	-1.56337833404541	-0.730720520019531	-6.12404632568359	2.31698608398438	-1.84893798828125	-0.630867958068848	-6.0351390838623	-6.15631008148193	-8.81831073760986	-9.04383850097656	-1.50963592529297	-10.6788415908813	-7.39865779876709	0.084416389465332	-5.68764209747314	-0.129426956176758	-8.30542278289795	-5.98623943328857	0.187832832336426
758	XP_011262697.2;E2ARG4;E2A6I8;XP_011252363.1;XP_011252362.1	+	1.62097	0.0294286	3.16228	0.976807	tr|E2ARG4|E2ARG4_CAMFO Beta-hexosaminidase OS=Camponotus floridanus (Florida carpenter ant) OX=104421 GN=EAG_09586 PE=3 SV=1	0.78829288482666	2.19669818878174	1.69025230407715	0.0642147064208984	-0.608499526977539	1.84132766723633	-5.16416072845459	0.777297019958496	-7.44650173187256	-0.61882495880127	0.915029525756836	-5.14743995666504	-3.47254943847656	1.81630897521973	-2.65054988861084	-3.94587516784668	-2.35519695281982	-5.07450103759766	-2.3281307220459	0.360275268554688	-3.91732692718506	-2.57244491577148	-1.64201259613037	-5.47916698455811	-9.73878383636475	-8.1903829574585	-0.10645866394043	-8.99991035461426
761	E2ARH9;XP_011262712.1	+	3.7882	0.0133333	-3.05724	-1.18281	tr|E2ARH9|E2ARH9_CAMFO PA2c domain-containing protein OS=Camponotus floridanus (Florida carpenter ant) OX=104421 GN=EAG_09601 PE=3 SV=1;|XP_011262712.1 phospholipase A2 [Camponotus floridanus]	3.11489772796631	3.78286266326904	-0.941303253173828	4.10724830627441	5.48881340026855	3.52799224853516	3.73340320587158	3.14459323883057	3.93411350250244	2.57045459747314	-0.671632766723633	1.94888687133789	2.99186515808105	0.953441619873047	5.25674343109131	5.67685127258301	6.27500247955322	6.68599319458008	6.32195472717285	5.99514770507813	6.43899822235107	6.00777816772461	3.90062236785889	5.09659290313721	5.98001670837402	6.72739601135254	3.7004280090332	6.42351245880127
874	E2AX18;XP_011265519.1;XP_011265517.1	+	5.22285	0	-4.47854	-1.71373	tr|E2AX18|E2AX18_CAMFO Glutathione S-transferase OS=Camponotus floridanus (Florida carpenter ant) OX=104421 GN=EAG_01201 PE=3 SV=1;|XP_011265519.1 glutathione S-transferase-like [Camponotus floridanus]	-3.94425106048584	0.311966896057129	-3.63358688354492	0.239177703857422	0.331222534179688	2.27418899536133	-0.32718563079834	-0.473113059997559	-3.89100170135498	-1.65844821929932	-2.41772651672363	0.317514419555664	1.56367683410645	-2.99921035766602	2.59533977508545	3.71584320068359	4.18626117706299	4.56183242797852	4.45150184631348	4.3820915222168	3.86574459075928	4.55720138549805	2.73312282562256	3.08960437774658	3.88908195495605	3.76972198486328	0.0768489837646484	2.51853466033936
895	E2AY06;XP_011266013.1	+	2.49023	0.0165	3.31379	1.13463	tr|E2AY06|E2AY06_CAMFO Peptidase_M14 domain-containing protein OS=Camponotus floridanus (Florida carpenter ant) OX=104421 GN=EAG_12714 PE=4 SV=1;|XP_011266013.1 carboxypeptidase B [Camponotus floridanus]	0.0341196060180664	0.539671897888184	-1.1702766418457	-2.70653915405273	1.18885040283203	-3.76534080505371	-3.70084285736084	1.54273700714111	-0.479300498962402	-2.84709453582764	0.34025764465332	-0.455801010131836	0.556434631347656	-1.6419563293457	-2.62781810760498	-3.65332984924316	-2.6897611618042	-0.563249588012695	-1.58893585205078	-4.90189933776855	-4.56275272369385	-1.53666114807129	0.557320594787598	-6.36086797714233	-9.87240695953369	-8.53330230712891	-7.16732025146484	-5.4572114944458
1028	XP_011252309.2;E2A6E2	+	1.99743	0.0144	-3.6029	-1.12686	tr|E2A6E2|E2A6E2_CAMFO Protein G12 OS=Camponotus floridanus (Florida carpenter ant) OX=104421 GN=EAG_09917 PE=4 SV=1	-1.57297992706299	-5.10046863555908	1.91994094848633	-0.926252365112305	-9.16422367095947	0.621221542358398	-4.74259090423584	-6.64425945281982	-4.24241542816162	0.441023826599121	1.85775756835938	2.20813369750977	-1.76346015930176	2.26859855651855	-2.02702045440674	0	3.66062831878662	6.95468139648438	1.84677314758301	2.75843048095703	2.19809055328369	2.55928802490234	4.68051624298096	-0.160187721252441	2.44672393798828	3.4668140411377	-1.78604316711426	-0.998122215270996
1045	XP_011254133.1;E2A9W2	+	7.30223	0	6.89956	2.63497	tr|E2A9W2|E2A9W2_CAMFO Thioredoxin domain-containing protein OS=Camponotus floridanus (Florida carpenter ant) OX=104421 GN=EAG_08823 PE=3 SV=1	-2.08074855804443	0.860194206237793	-0.0386257171630859	1.74194717407227	2.99625778198242	0.451852798461914	1.77521800994873	1.26894664764404	2.48204517364502	1.29293727874756	0.418607711791992	2.34074974060059	2.18177223205566	-0.172029495239258	-5.97119665145874	-3.34433746337891	-7.95718193054199	-4.38753318786621	-2.32720184326172	-4.34546375274658	-8.15059280395508	-7.29232597351074	-4.26286792755127	-5.69638633728027	-8.54173183441162	-8.62100601196289	-1.5919246673584	-8.5849142074585
1276	XP_025264718.1	+	1.34985	0.03375	3.27239	0.942247	|XP_025264718.1 mediator of RNA polymerase II transcription subunit 12 [Camponotus floridanus]	0.45998477935791	-2.71391201019287	-1.19127082824707	4.79374504089355	-1.5937557220459	-1.07464408874512	-2.65868091583252	-0.422595024108887	-0.289837837219238	2.89874362945557	1.98362159729004	-1.39811706542969	-3.33744430541992	3.88900756835938	-3.52580738067627	-2.82882499694824	-1.57900142669678	-11.0860872268677	-2.13210296630859	-1.39455604553223	0.0317296981811523	2.06228637695313	-3.32416248321533	-1.04463863372803	-5.01254367828369	0.305641174316406	-8.01090049743652	-8.92963886260986
1280	XP_025265137.1;E2ABS8	+	2.59132	0	4.82771	1.46417	tr|E2ABS8|E2ABS8_CAMFO Alpha-mann_mid domain-containing protein OS=Camponotus floridanus (Florida carpenter ant) OX=104421 GN=EAG_15547 PE=4 SV=1	-4.06140422821045	-2.27675151824951	2.15896415710449	-3.82745552062988	-1.27762031555176	-0.675090789794922	-3.52754688262939	0.0554666519165039	-2.18642520904541	-1.88687419891357	0.804033279418945	-1.53787612915039	-4.03069686889648	-0.841623306274414	-9.52432823181152	-9.60685634613037	-8.35525512695313	2.3715877532959	-8.2555046081543	-0.984825134277344	-10.5315217971802	-10.8184108734131	-1.48185443878174	-4.57823848724365	-8.00987911224365	-8.10968971252441	-4.55317306518555	-8.26094818115234
1292	XP_025266319.1;E1ZXZ5;E2AC93	+	2.4465	0.019	2.95282	1.04249	tr|E1ZXZ5|E1ZXZ5_CAMFO Arylphorin subunit alpha OS=Camponotus floridanus (Florida carpenter ant) OX=104421 GN=EAG_11874 PE=4 SV=1	1.17750072479248	4.68136692047119	4.79893684387207	5.07210540771484	1.26931190490723	1.83714485168457	-0.20839786529541	-0.370055198669434	-1.72377109527588	0.515175819396973	3.2109260559082	-0.776300430297852	-0.990394592285156	0.0398120880126953	-3.54967975616455	-4.44193840026855	0.797263145446777	-1.91050148010254	-4.45159912109375	0.492515563964844	-2.36344242095947	0.285285949707031	-2.01790332794189	-2.68427753448486	-0.484601974487305	-1.05464935302734	1.42581748962402	-2.848464012146
62	XP_025267081.1;XP_011269145.1;XP_011268884.1;E1ZUV1		0.540349	0.387437	-1.18037	-0.385006	tr|E1ZUV1|E1ZUV1_CAMFO V-type proton ATPase su	-4.92077350616455	-1.77738857269287	-2.0380687713623	-3.59689521789551	-3.57925605773926	-3.74974060058594	-10.5861072540283	-4.7257776260376	-3.72894763946533	-8.56808853149414	-3.01738548278809	-4.78740501403809	-7.99050760269165	-3.83461952209473	-3.39321804046631	-8.42854690551758	-1.37294101715088	-7.90930366516113	-1.91309356689453	-3.73222827911377	-3.23807811737061	-1.73017883300781	-7.86595058441162	-2.30591297149658	-2.19770050048828	-1.10400772094727	-3.59948921203613	-1.58511257171631
102	XP_011258052.1;E1ZX35;E2ANB5;XP_011262825.1;E2ARN6;E2ARF2;XP_011262682.2;XP_011261161.2		1.08656	0.121273	2.47535	0.747176	tr|E1ZX35|E1ZX35_CAMFO Ubiquitin-like domain-containing protein OS=Camponotus floridanus (Florida carpenter ant) OX=104421 GN=EAG_06521 PE=4 SV=1;tr|E2ANB5|E2ANB5_CAMFO Ubiquitin OS	0.920086860656738	0.376177787780762	2.2779712677002	2.44912528991699	2.95519065856934	2.02653884887695	-8.61462879180908	1.15825176239014	2.57916164398193	0.627467155456543	1.1063404083252	3.37088966369629	1.96540260314941	1.8379955291748	-0.579739570617676	-1.69648170471191	-8.37997627258301	1.06492233276367	-1.27084732055664	-9.26323986053467	0.999558448791504	0.750158309936523	1.61495494842529	-0.041203498840332	-0.171224594116211	-1.51646041870117	-0.994958877563477	-0.13443660736084
114	XP_011260780.1;E1ZXJ7		0.221761	0.766642	0.417823	0.150426	tr|E1ZXJ7|E1ZXJ7_CAMFO Tyrosinase_Cu-bd domain-containing protein OS=Camponotus floridanus (Florida carpenter ant) OX=104421 GN=EAG_04466 PE=4 SV=1	-3.17112636566162	-0.384634971618652	-1.74516868591309	-0.535497665405273	-2.99087524414063	-7.2094554901123	1.24954509735107	0.592406272888184	-1.96574306488037	-1.17883777618408	-2.81588935852051	-3.15482711791992	0.494874954223633	-2.80933952331543	-1.2819128036499	1.40951347351074	2.05671215057373	-1.34416007995605	0.572628021240234	-4.00218677520752	-1.85732555389404	-2.02593231201172	-3.41854572296143	-3.30873966217041	-2.75807952880859	-4.28927612304688	-5.27481269836426	-5.95197677612305
130	XP_011263402.1;E1ZY32		1.66274	0.2365	-1.55763	-0.599638	tr|E1ZY32|E1ZY32_CAMFO Uncharacterized protein OS=Camponotus floridanus (Florida carpenter ant) OX=104421 GN=EAG_09984 PE=4 SV=1	0.684309959411621	1.45396518707275	0.303377151489258	1.86634826660156	-0.458465576171875	3.02196502685547	1.45657634735107	-1.76794910430908	2.67088603973389	1.19705295562744	1.00787734985352	2.0878734588623	-8.27739238739014	1.23030090332031	0.879591941833496	2.38850975036621	2.91956996917725	4.17966461181641	1.41806793212891	2.16101264953613	3.13412952423096	-0.539295196533203	3.44658374786377	1.87634563446045	1.4370059967041	2.04401206970215	0.332611083984375	2.60571956634521
163	XP_011268522.1;E1ZZX0		0.959705	0.192	2.10452	0.652401	tr|E1ZZX0|E1ZZX0_CAMFO ADP,ATP carrier protein 2 OS=Camponotus floridanus (Florida carpenter ant) OX=104421 GN=EAG_16360 PE=3 SV=1	1.06824207305908	-0.816397666931152	0.121343612670898	0.25184440612793	0	0.307859420776367	-4.18341732025146	-0.00735187530517578	-0.81569766998291	-1.02143573760986	-0.89124870300293	1.46991920471191	1.43618774414063	0.316577911376953	-1.27493190765381	1.38064002990723	2.23017406463623	-0.717700958251953	2.59399604797363	-8.16664695739746	-2.99665927886963	-8.98916912078857	-4.63052082061768	2.08888339996338	-2.96191024780273	-9.69189071655273	-0.986717224121094	-0.104401588439941
182	XP_011268846.1;XP_011265836.1;XP_011264341.1;E2A0J1		0.631136	0.760074	0.353442	0.154811	tr|E2A0J1|E2A0J1_CAMFO Histone H4 OS=Camponotus floridanus (Florida carpenter ant) OX=104421 GN=EAG_09814	1.23564052581787	0.885199546813965	1.91228103637695	2.58083724975586	0.901756286621094	3.1210823059082	0.740933418273926	3.23243999481201	-1.8167142868042	0.0113954544067383	1.55705451965332	2.1760196685791	4.13983535766602	1.92736053466797	0.00490665435791016	1.45951461791992	0.984492301940918	0.929365158081055	1.37935066223145	3.2388801574707	0.920002937316895	2.57330322265625	-0.826115608215332	1.64323139190674	1.43475341796875	0.402021408081055	3.11015892028809	0.403069496154785
240	E2A3I0;XP_011250877.1;XP_011250876.1;XP_011250875.1;XP_011250874.1		0.147468	0.785809	0.397458	0.13016	tr|E2A3I0|E2A3I0_CAMFO 14_3_3 domain-containing protein OS=Camponotus floridanus (Florida carpenter ant) OX=104421 GN=EAG_13996 PE=3 SV=1;|XP_011250876.1 14-3-3 protein zeta isoform X3 [C	-2.26770496368408	-7.83171129226685	-2.68626594543457	-2.37030029296875	-1.67133712768555	-3.29808807373047	-4.81670093536377	-4.10283374786377	-2.82215976715088	-2.97401714324951	-2.47795867919922	-2.58937644958496	-1.60776138305664	-1.46407127380371	-0.550402641296387	-2.75272941589355	-1.50838565826416	-1.72873306274414	-1.4136905670166	0.0282878875732422	-2.57360363006592	-8.1666145324707	-1.92967510223389	-4.48530864715576	-1.61642646789551	-12.0395021438599	-1.42530059814453	-8.38261413574219
273	E2A4U9;XP_019882208.1;XP_011251636.1;XP_011251639.2		0.707103	0.381563	-1.15559	-0.405704	tr|E2A4U9|E2A4U9_CAMFO Guanine deaminase OS=Camponotus floridanus (Florida carpenter ant) OX=104421 GN=EAG_04593 PE=4 SV=1	-1.21731090545654	-0.012364387512207	-9.74739837646484	-2.28159523010254	1.32485771179199	-4.13704109191895	0.643855094909668	0.896607398986816	1.10314655303955	-2.98751163482666	-3.84777069091797	-1.59615135192871	-0.458024978637695	-2.14891624450684	-3.43636035919189	0.260581970214844	-1.51223468780518	-4.18353271484375	-1.01149749755859	-1.60503768920898	1.44303035736084	-0.430183410644531	0.00943470001220703	-0.190192222595215	1.88638877868652	0	-1.1226692199707	1.60498142242432
275	XP_011251688.1;E2A4X8		1.2868	0.420513	-0.847103	-0.353638	tr|E2A4X8|E2A4X8_CAMFO Trehalase OS=Camponotus floridanus (Florida carpenter ant) OX=104421 GN=EAG_13710 PE=3 SV=1	-0.947342872619629	0.012364387512207	-0.62244987487793	-0.852787017822266	0.117908477783203	0.508939743041992	1.07529735565186	0.398482322692871	1.04423809051514	0.15703296661377	-0.249259948730469	0.335424423217773	0.353487014770508	-1.42558097839355	-0.13895320892334	2.20497894287109	0.928292274475098	3.56846046447754	1.14556121826172	0.203880310058594	1.29748439788818	1.28668022155762	-0.435053825378418	0.703473091125488	1.47283172607422	-0.00129318237304688	-0.640707015991211	0.169562339782715
291	XP_019882306.1;E2A5W9		0.427386	0.383556	1.31797	0.38415	tr|E2A5W9|E2A5W9_CAMFO Peptidase S1 domain-containing protein OS=Camponotus floridanus (Florida carpenter ant) OX=104421 GN=EAG_05387 PE=3 SV=1	0.0661535263061523	-3.44298839569092	5.08230209350586	0	-0.979888916015625	4.85222816467285	0.0145540237426758	2.56172847747803	-1.25836658477783	1.94528865814209	4.8828239440918	2.03036880493164	0.799215316772461	4.1046199798584	2.59725093841553	3.12069702148438	2.70145130157471	4.22068405151367	-0.657573699951172	-2.06978416442871	-0.37906551361084	-8.41844749450684	3.0390157699585	-8.73922443389893	2.14956092834473	0.751949310302734	2.84104156494141	1.0488805770874
303	XP_011252356.1;E2A6I4		0.81809	0.367	-1.17696	-0.424369	tr|E2A6I4|E2A6I4_CAMFO Vacuolar ATP synthase catalytic subunit A OS=Camponotus floridanus (Florida carpenter ant) OX=104421 GN=EAG_16297 PE=3 SV=1	-1.91947269439697	-4.04685306549072	-0.0979557037353516	-2.83063697814941	-4.78238487243652	-1.7631950378418	-1.29957675933838	-4.47225666046143	-3.00224781036377	-1.31937313079834	-1.64269638061523	-0.185670852661133	-2.2423267364502	0.0176239013671875	0.680033683776855	-0.0671424865722656	-2.07668399810791	-1.57090950012207	-6.07325553894043	0.428976058959961	1.90325832366943	0.848094940185547	-0.304774284362793	-3.99572277069092	1.79243659973145	-4.89859390258789	0.339122772216797	-0.114405632019043
305	XP_011252428.1;E2A6N1;XP_025262425.1;XP_011252154.1;XP_011252142.1;E1ZVV0;E1ZVU9;XP_025262454.1;XP_025262453.1;XP_025262452.1;XP_025262451.1		0.764125	0.368245	1.33801	0.457286	tr|E2A6N1|E2A6N1_CAMFO Tropomyosin-1 OS=Camponotus floridanus (Florida carpenter ant) OX=104421 GN=EAG_00808 PE=3 SV=1	1.6632719039917	-2.42265224456787	0.477695465087891	-0.111061096191406	0.0965137481689453	-0.073516845703125	-1.74475955963135	2.31221485137939	-0.460677146911621	0.670022010803223	1.15646743774414	2.65354347229004	0.0128345489501953	1.99600410461426	0.343817710876465	-0.334775924682617	2.15489101409912	-0.884927749633789	0.523853302001953	-7.07124376296997	-1.41343021392822	-0.0351963043212891	-0.378798484802246	0.215231895446777	-3.47929000854492	-4.44756317138672	4.88455581665039	-2.5833158493042
313	E2A6W8;XP_011252591.1		0.0723763	0.878047	0.189596	0.0640528	tr|E2A6W8|E2A6W8_CAMFO Folate gamma-glutamyl hydrolase OS=Camponotus floridanus (Florida carpenter ant) OX=104421 GN=EAG_02507 PE=4 SV=1;|XP_011252591.1 chitobiosyldiphosphodolichol beta-mannosyltransferase [Camponotus floridanus]	-3.14425182342529	-0.560975074768066	-1.86814308166504	-4.71900177001953	-3.58692169189453	-2.42353248596191	-1.35467052459717	-2.96815204620361	-0.243353843688965	-3.29649829864502	-2.22150993347168	-1.05070877075195	-10.5582628250122	-2.58632850646973	-3.13602161407471	-7.8857741355896	-2.63353252410889	-1.07254409790039	-4.63637733459473	-1.18453788757324	-1.86428928375244	-6.79236888885498	-3.32397937774658	-3.77162265777588	-1.48305320739746	-2.89107513427734	-2.66588401794434	0.104401588439941
345	E2A8M5;XP_025269992.1		0.436598	0.439765	-1.01336	-0.328831	tr|E2A8M5|E2A8M5_CAMFO Amino_oxidase domain-containing protein OS=Camponotus floridanus (Florida carpenter ant) OX=104421 GN=EAG_14015 PE=4 SV=1;|XP_025269992.1 spermine oxidase [Camponotus floridanus]	-6.30362415313721	-0.972809791564941	-3.61696243286133	-7.67278528213501	-1.99975395202637	-4.66024971008301	-2.07827663421631	-1.51370716094971	-0.458100318908691	-7.46570730209351	-7.42967462539673	-3.34470558166504	-1.72019958496094	-3.97968101501465	-6.32184982299805	-2.96457290649414	-1.26546001434326	-1.43585014343262	-8.88275051116943	0.232379913330078	-0.70493221282959	0	-6.09331607818604	-4.38931179046631	-0.598789215087891	-2.75866508483887	-3.39186477661133	-0.45419979095459
371	XP_011254034.1;E2A9P3		0.897218	0.359608	-1.26041	-0.454626	tr|E2A9P3|E2A9P3_CAMFO Vitellogenin domain-containing protein OS=Camponotus floridanus (Florida carpenter ant) OX=104421 GN=EAG_11463 PE=4 SV=1	-7.45309829711914	-6.52877330780029	-6.04570770263672	-3.0533390045166	-5.26594543457031	-1.4267406463623	-5.8582067489624	-7.00779962539673	-2.70990657806396	-5.49186038970947	-6.53427314758301	-4.68023109436035	-3.28731727600098	-6.31094551086426	-2.24744319915771	-3.30013847351074	-2.18442821502686	-4.04087448120117	-3.79546546936035	-6.02505683898926	-3.57332706451416	-3.79728507995605	-3.53167629241943	-6.54468631744385	-3.71556091308594	-2.07929992675781	-6.39139938354492	-2.78174304962158
432	XP_011255085.1;E2ABQ6		0.264577	0.619248	-0.676273	-0.219231	tr|E2ABQ6|E2ABQ6_CAMFO Glyceraldehyde-3-phosphate dehydrogenase OS=Camponotus floridanus (Florida carpenter ant) OX=104421 GN=EAG_14416 PE=3 SV=1	-1.3402681350708	-2.50228595733643	2.4132251739502	-1.72522926330566	-0.340005874633789	-0.004669189453125	-9.00067710876465	-2.81611919403076	-1.89821338653564	-3.64813709259033	-0.991462707519531	-1.28481483459473	-10.0299863815308	-1.13935089111328	-1.25240230560303	-0.958171844482422	-0.308444023132324	2.3699951171875	0.0445308685302734	3.62586402893066	-1.19980335235596	-7.36828899383545	-3.99007320404053	-4.49520397186279	-1.6446361541748	-4.26023483276367	-1.31235122680664	-4.09095096588135
436	E2ABW9;XP_011255166.1		0.684526	0.339256	1.56008	0.491512	tr|E2ABW9|E2ABW9_CAMFO ATP synthase subunit beta OS=Camponotus floridanus (Florida carpenter ant) OX=104421 GN=EAG_02827 PE=3 SV=1;|XP_011255166.1 ATP synthase subunit beta, mitochondrial [Camponotus floridanus]	-0.393017768859863	-1.52041149139404	-1.40392684936523	-1.25588607788086	-7.93984127044678	-1.62870407104492	-2.78969669342041	-5.07225704193115	-4.15011692047119	-0.338706016540527	-1.9741039276123	-0.266609191894531	-0.154880523681641	-0.351181030273438	-8.39300346374512	-2.60094261169434	-1.19512844085693	-3.63246536254883	-1.11207008361816	-1.01514434814453	-1.58586978912354	-1.15480613708496	-3.37741565704346	-2.88044452667236	-6.04987764358521	-9.32283592224121	-1.98679161071777	-6.77368450164795
443	XP_011255282.1;E2AC27		0.361952	0.699423	-0.47811	-0.184389	tr|E2AC27|E2AC27_CAMFO GMC_OxRdtase_N domain-containing protein OS=Camponotus floridanus (Florida carpenter ant) OX=104421 GN=EAG_13495 PE=4 SV=1	8.45933437347412	10.096474647522	6.04380035400391	8.69106674194336	10.9256629943848	7.31387901306152	10.708701133728	10.290545463562	10.6612634658813	8.26262950897217	7.77332878112793	9.58466148376465	10.0630683898926	7.41123962402344	8.86655521392822	8.9150505065918	10.0133504867554	10.4671936035156	8.75407981872559	10.425329208374	10.800389289856	11.3092193603516	8.69772052764893	9.22882556915283	11.0454616546631	8.97465896606445	6.4763355255127	9.00502681732178
444	XP_011255300.1;E2AC60		1.11464	0.582424	-0.544513	-0.238476	tr|E2AC60|E2AC60_CAMFO Beta-hexosaminidase OS=Camponotus floridanus (Florida carpenter ant) OX=104421 GN=EAG_07587 PE=3 SV=1	1.25197124481201	1.2294454574585	0.678195953369141	2.10531044006348	1.49877548217773	0.004669189453125	0.44444751739502	2.9040060043335	1.09060764312744	1.633620262146	1.24218940734863	2.58002471923828	1.6793155670166	0.790739059448242	1.45441913604736	2.47973251342773	3.17642688751221	2.43240737915039	1.9737377166748	-0.371671676635742	2.34928226470947	2.82331848144531	1.9910249710083	1.98588466644287	2.61439323425293	0.664295196533203	2.21234130859375	0.970913887023926
447	E2AC94		0.0979572	0.864952	-0.216639	-0.0765623	tr|E2AC94|E2AC94_CAMFO Hexamerin OS=Camponotus floridanus (Florida carpenter ant) OX=104421 GN=EAG_02268 PE=4 SV=1	-1.42812633514404	-3.20806407928467	-0.723318099975586	-8.28071594238281	-8.00315856933594	1.57642936706543	-5.56254863739014	-3.39191341400146	-6.3452353477478	-4.38410472869873	-2.30688667297363	-4.90084838867188	-6.29708766937256	-2.70520210266113	-3.90319347381592	-3.52218627929688	-1.14996433258057	-4.43469619750977	-6.90627193450928	-1.3513355255127	-6.33735084533691	-7.78239965438843	-1.52101612091064	-6.01945400238037	-2.15633392333984	-3.62254905700684	0.337657928466797	-4.55873966217041
456	XP_011255648.1;E2ACR5		0.362219	0.575711	0.705965	0.245552	tr|E2ACR5|E2ACR5_CAMFO Annexin OS=Camponotus floridanus (Florida carpenter ant) OX=104421 GN=EAG_15889 PE=3 SV=1	2.02853870391846	0.451525688171387	-0.762042999267578	-2.1141471862793	-6.41688203811646	-0.548929214477539	-8.56682872772217	-6.32118272781372	-3.11802768707275	-5.17142772674561	-2.80406188964844	-3.30998039245605	-3.9613037109375	-0.466949462890625	-2.62669849395752	-6.88368320465088	-3.20093059539795	-4.63998889923096	-3.7791805267334	-3.51506900787354	-3.62027454376221	-4.06499671936035	-0.944882392883301	-4.04768085479736	-3.80278968811035	-4.53029632568359	-2.92734146118164	-2.38139629364014
487	XP_011256209.1;E2ADT4		1.10328	0.42855	-0.843625	-0.345417	tr|E2ADT4|E2ADT4_CAMFO Aamy domain-containing protein OS=Camponotus floridanus (Florida carpenter ant) OX=104421 GN=EAG_10419 PE=4 SV=1	-2.74620342254639	-1.94535160064697	-4.42878532409668	-5.14812660217285	-3.1539249420166	-5.10516548156738	-8.01329326629639	-2.69753360748291	-2.65745258331299	-5.82922840118408	-5.7265510559082	-4.69833374023438	-4.03536987304688	-5.80587959289551	-2.20440006256104	-3.47302436828613	-1.67529392242432	-3.89584159851074	-5.04911613464355	-2.29302978515625	-4.98137950897217	-0.794712066650391	-4.50378322601318	-4.09003734588623	-5.39973258972168	-3.36410522460938	-3.02316856384277	-5.43282127380371
499	XP_011256478.1;E2AE51		1.62401	0.39391	-0.92645	-0.392233	tr|E2AE51|E2AE51_CAMFO Cathepsin L OS=Camponotus floridanus (Florida carpenter ant) OX=104421 GN=EAG_13195 PE=3 SV=1	-0.110774040222168	-0.145947456359863	-1.72926712036133	0.349075317382813	0.960748672485352	-0.541854858398438	-0.407586097717285	0.744153022766113	-0.267708778381348	0.0183687210083008	-0.709051132202148	-0.0226364135742188	-0.204460144042969	0.103897094726563	0.88451099395752	0.326026916503906	0.576018333435059	-2.17270278930664	0.853843688964844	1.73355293273926	1.44381809234619	2.30377388000488	1.55220317840576	1.63001728057861	0.935432434082031	-0.883903503417969	0.158393859863281	1.66626453399658
521	XP_019883183.1;E2AEN9;XP_011256790.1		0.755169	0.369161	1.17735	0.417186	tr|E2AEN9|E2AEN9_CAMFO Cuticlin-1 OS=Camponotus floridanus (Florida carpenter ant) OX=104421 GN=EAG_10698 PE=4 SV=1;|XP_011256790.1 uncharacterized protein LOC105251573 i	-7.585045337677	1.26550769805908	-3.88558578491211	-2.00050354003906	2.40091323852539	-3.05959701538086	1.6271505355835	3.48370265960693	1.74088001251221	-1.00474262237549	-2.67993927001953	-1.27512550354004	0.667802810668945	-1.67259788513184	-7.51646900177002	-4.11565589904785	-6.12272930145264	0.234685897827148	-2.6322078704834	-0.952108383178711	-0.802657127380371	1.7952823638916	-4.87936687469482	0.446290016174316	-2.17018508911133	-2.39209365844727	-1.34547996520996	1.99258518218994
537	XP_011257343.1;XP_011257342.1;E2AFQ5		0.660194	0.387943	-1.10597	-0.38729	tr|E2AFQ5|E2AFQ5_CAMFO Actin-5C OS=Camponotus floridanus (Florida carpenter ant) OX=104421 GN=EAG_04690 PE=3 SV=1	-1.7673864364624	-1.49241161346436	-1.10294342041016	-0.787509918212891	-0.478811264038086	-0.932733535766602	-8.78244495391846	-2.82381534576416	-7.80005025863647	-1.48022747039795	-1.78801155090332	-1.68109893798828	0.0568675994873047	-0.946344375610352	0.626177787780762	-1.87721061706543	-2.72738933563232	-0.188077926635742	-1.77961540222168	-0.629022598266602	-0.436718940734863	-2.94415283203125	0.37395191192627	-1.62759494781494	-0.864677429199219	-2.61373329162598	0.464405059814453	-2.09964084625244
549	E2AGG0;XP_011257663.3		0.787807	0.304103	1.63471	0.526409	tr|E2AGG0|E2AGG0_CAMFO Phospholipase B1, membrane-associated OS=Camponotus floridanus (Florida carpenter ant) OX=104421 GN=EAG_02880 PE=4 SV=1;|XP_011257663.3 phospholipase B1, membrane-associated [Camponotus floridanus]	-0.268424034118652	-6.22873640060425	-1.77243423461914	-1.36654472351074	0.600255966186523	-0.413055419921875	-0.165797233581543	0.553790092468262	-1.28983783721924	-0.796948432922363	0.552268981933594	0.821277618408203	1.14496612548828	-1.7330265045166	-3.14097118377686	-1.19264221191406	-0.246827125549316	-2.63015747070313	-0.998176574707031	-8.30859375	0.311087608337402	-10.1878881454468	-0.754086494445801	-3.35134601593018	0.937843322753906	-3.8686695098877	-0.970333099365234	1.1525354385376
597	E2AIX5;XP_025263124.1		0.0880987	0.87685	0.195943	0.0693118	tr|E2AIX5|E2AIX5_CAMFO Maltase 1 OS=Camponotus floridanus (Florida carpenter ant) OX=104421 GN=EAG_01963 PE=4 SV=1	4.22391796112061	7.50176906585693	1.02892684936523	6.1393871307373	6.70207977294922	-0.124521255493164	7.75867176055908	5.43699550628662	7.45462703704834	4.33932781219482	5.06038856506348	5.66410827636719	7.11225509643555	2.93005561828613	5.67844867706299	6.72109222412109	7.26034450531006	5.22877502441406	5.59361267089844	3.18967247009277	3.85825634002686	2.1299877166748	4.12755298614502	5.78444766998291	4.24070930480957	5.7891960144043	2.67624855041504	6.20644664764404
599	XP_011258918.1;E2AIZ6		0.127629	0.808167	0.332095	0.11066	tr|E2AIZ6|E2AIZ6_CAMFO ML domain-containing protein OS=Camponotus floridanus (Florida carpenter ant) OX=104421 GN=EAG_15583 PE=4 SV=1	3.28725528717041	2.7263879776001	3.04706382751465	0.0895957946777344	-0.506511688232422	4.19797706604004	3.13974094390869	2.51009654998779	-8.93246746063232	3.11592769622803	4.09429168701172	2.48935317993164	3.48862838745117	5.04904937744141	5.18504428863525	1.21021270751953	0.531632423400879	2.35553359985352	-0.665689468383789	-0.158817291259766	0.321179389953613	2.46455192565918	2.12646007537842	2.37747859954834	2.3392448425293	0.394393920898438	2.50211715698242	2.16371250152588
615	E2AJL8		0.206174	0.764354	-0.394974	-0.141964	tr|E2AJL8|E2AJL8_CAMFO Carboxylic ester hydrolase OS=Camponotus floridanus (Florida carpenter ant) OX=104421 GN=EAG_07771 PE=3 SV=1	-1.17212581634521	3.18990993499756	0.601442337036133	3.59175491333008	6.37030029296875	1.24401092529297	5.11332035064697	4.96531200408936	3.66199970245361	2.32796382904053	-1.2137393951416	1.78348350524902	4.52657127380371	-0.0147914886474609	-0.452130317687988	3.56819725036621	5.9971170425415	5.43006324768066	1.8702564239502	3.19722747802734	4.29409313201904	5.56331634521484	-0.399065971374512	3.18850231170654	2.2678050994873	2.48942565917969	0.485872268676758	3.00436305999756
628	XP_011259459.2;E2AJX6		0.292528	0.704533	0.492292	0.180559	tr|E2AJX6|E2AJX6_CAMFO Catalase OS=Camponotus floridanus (Florida carpenter ant) OX=104421 GN=EAG_13772 PE=3 SV=1	-2.65347194671631	-3.7477388381958	-0.314722061157227	-3.80108261108398	-1.75201988220215	-2.02889823913574	-2.85818004608154	-4.88734912872314	-2.35092067718506	-4.27238178253174	-2.81509208679199	-3.45613861083984	-1.09174728393555	-1.87728118896484	-0.592944145202637	-5.17107391357422	-3.58646869659424	1.40402412414551	-3.96832275390625	-3.92527198791504	-0.553278923034668	-7.84239196777344	-1.47540187835693	-5.15738201141357	-1.52075004577637	-3.63837432861328	-1.46958541870117	-7.30189514160156
633	E2AK04;XP_011259541.1		0.51528	0.447907	0.927933	0.323379	tr|E2AK04|E2AK04_CAMFO Protein CREG1 OS=Camponotus floridanus (Florida carpenter ant) OX=104421 GN=EAG_05019 PE=4 SV=1;|XP_011259541.1 protein CREG1-like [Camponotus floridanus]	-1.51296710968018	-2.65084934234619	-0.215892791748047	-0.73530387878418	-0.44300651550293	0.719816207885742	1.63300800323486	-0.840655326843262	1.16952228546143	1.04227542877197	0.305141448974609	0.269367218017578	0.509250640869141	-0.176370620727539	0.541436195373535	0.620018005371094	-1.91486263275146	-0.668773651123047	-0.625843048095703	-8.75444507598877	-3.50845432281494	-0.841373443603516	0.602835655212402	1.54222965240479	-3.11800193786621	0.401803970336914	0.192228317260742	1.61347675323486
641	XP_011259751.1;E2AKD6		1.07985	0.128167	2.36773	0.725909	tr|E2AKD6|E2AKD6_CAMFO V-type proton ATPase proteolipid subunit OS=Camponotus floridanus (Florida carpenter ant) OX=104421 GN=EAG_15368 PE=3 SV=1	2.48012065887451	0.440360069274902	1.55794143676758	-6.55796384811401	2.26280212402344	2.77225494384766	3.45702457427979	2.31362819671631	5.10615253448486	2.07275676727295	1.42461204528809	3.17825508117676	2.25293159484863	4.13181495666504	3.09995174407959	-1.06929588317871	-5.60567331314087	2.25256156921387	-8.14471912384033	0.666572570800781	1.82470798492432	-7.59489917755127	3.70304203033447	1.4828519821167	0.129426956176758	0.439559936523438	1.79375267028809	0.766646385192871
642	XP_025266940.1;XP_019883729.1;E2AKF6		1.44278	0.124571	-2.20768	-0.749743	tr|E2AKF6|E2AKF6_CAMFO DOMON domain-containing protein CG14681 OS=Camponotus floridanus (Flori	-1.57784175872803	-3.04022121429443	-4.27952766418457	-7.6948356628418	-5.12779998779297	-4.5172290802002	-10.0900173187256	-4.42260456085205	-6.65418863296509	-3.96312999725342	-4.29075050354004	-6.18062829971313	-0.0128345489501953	-4.70206832885742	1.39343929290771	-0.346303939819336	-0.476183891296387	-3.1871280670166	0.58660888671875	-2.16455268859863	-9.10345935821533	-6.53712129592896	0.306262016296387	-6.94302701950073	-7.03361654281616	0.960407257080078	-2.2858772277832	-0.815609931945801
648	XP_011259986.1;E2AKV6		0.598035	0.399169	-1.04668	-0.364222	tr|E2AKV6|E2AKV6_CAMFO Heat shock 70 kDa protein cognate 4 OS=Camponotus floridanus (Florida carpenter ant) OX=104421 GN=EAG_08137 PE=3 SV=1	-1.6209135055542	-4.78794384002686	0.450138092041016	-1.42275047302246	-0.0353507995605469	-1.37144088745117	-8.97898197174072	-6.37887191772461	-1.61797046661377	-4.06424999237061	-1.84451484680176	-1.14134788513184	-3.45709991455078	-0.980287551879883	-2.48762989044189	-2.69850730895996	-1.02455615997314	1.25374603271484	-1.43705940246582	2.08977890014648	-0.948397636413574	-1.3554801940918	0.242037773132324	-2.44059085845947	-4.69921112060547	-4.36528778076172	-1.2067699432373	-3.52016162872314
650	XP_011260079.2;E2AL14		0.590486	0.356385	1.4639	0.452652	tr|E2AL14|E2AL14_CAMFO Plasminogen activator inhibitor 1 OS=Camponotus floridanus (Florida carpenter ant) OX=104421 GN=EAG_06984 PE=3 SV=1	-1.22643947601318	-1.1033353805542	-2.24838638305664	0.446475982666016	-5.60914421081543	-3.47480964660645	-4.10080432891846	-2.72536182403564	-8.07388877868652	-3.70022296905518	-1.02777671813965	-7.64431285858154	-6.27056980133057	-1.93202018737793	-8.2985315322876	-4.48112106323242	-1.98971462249756	-7.20406293869019	-3.24065971374512	-7.86045122146606	-3.80199146270752	-0.912176132202148	-1.30854320526123	-8.00284004211426	-9.05111694335938	-7.13937187194824	-1.41835784912109	-4.47629261016846
666	E2ALP2;XP_011260424.1		1.14235	0.166615	2.09447	0.682297	tr|E2ALP2|E2ALP2_CAMFO Peptidase_M28 domain-containing protein OS=Camponotus floridanus (Florida carpenter ant) OX=104421 GN=EAG_10908 PE=4 SV=1;|XP_011260424.1 carboxypeptidase Q [Camponotus floridanus]	-1.24771976470947	-1.438551902771	1.27430534362793	-1.39001655578613	-2.74117851257324	1.3829174041748	0.191586494445801	-0.521376609802246	-0.00470447540283203	1.18168544769287	0.881410598754883	-1.27522659301758	-2.59890556335449	1.09709358215332	3.42966556549072	-1.15362739562988	-4.22979593276978	-0.122098922729492	-8.06631278991699	-2.32992744445801	-2.25770473480225	-7.22488212585449	0.51274585723877	-0.650530815124512	-8.37011432647705	-3.53099250793457	1.62320137023926	-2.16091823577881
667	E2ALS8;XP_019883851.2		0.88051	0.36256	1.2748	0.456524	tr|E2ALS8|E2ALS8_CAMFO Aminopeptidase N OS=Camponotus floridanus (Florida carpenter ant) OX=104421 GN=EAG_10592 PE=4 SV=1;|XP_019883851.2 LOW QUALITY PROTEIN: aminopeptidase N [Camponotus floridanus]	0.629153251647949	-4.40424060821533	2.58944702148438	-2.62412452697754	-2.59747314453125	2.5858154296875	-0.0145540237426758	0.206870079040527	0.00470447540283203	1.76870822906494	2.22861099243164	-0.751899719238281	-1.10345077514648	1.41801643371582	1.04040050506592	-4.21076583862305	-3.20878314971924	1.31527709960938	-5.85945510864258	-0.679441452026367	0.288332939147949	-1.48200988769531	-0.00943470001220703	0.509541511535645	-3.58598327636719	-4.22061347961426	2.50433731079102	-0.313050270080566
678	XP_011260763.1;E2AMD6;XP_011260762.1		0.111559	0.830116	-0.306256	-0.100676	tr|E2AMD6|E2AMD6_CAMFO Malic enzyme OS=Camponotus floridanus (Florida carpenter ant) OX=104421 GN=EAG_04942 PE=3 SV=1;|XP_011260762.1 NADP-dependent malic enzyme isoform X1 [Campo	-7.22461223602295	-1.62081623077393	-1.38586616516113	-4.32271194458008	-2.29906463623047	-5.75960731506348	-3.18631267547607	-1.8278112411499	0.29703426361084	-6.47206401824951	-5.92437934875488	-0.910566329956055	-9.34124374389648	-7.87265205383301	-5.12514591217041	-6.06964302062988	-8.43531227111816	-2.84951400756836	-2.12136077880859	-3.6939697265625	-2.70827388763428	-1.62051963806152	-6.39156818389893	-4.15852451324463	-1.85593032836914	-1.44047355651855	-4.55081176757813	-2.54203701019287
703	XP_011261399.1;E2ANT2		0.832027	0.359396	-1.2616	-0.44761	tr|E2ANT2|E2ANT2_CAMFO Vitellogenin OS=Camponotus floridanus (Florida carpenter ant) OX=104421 GN=EAG_14638 PE=4 SV=1	-5.68575000762939	-7.41664028167725	-8.29107666015625	-1.56103134155273	-8.99281215667725	-9.50841999053955	-5.70942211151123	-6.57915067672729	-8.00987434387207	-7.88880777359009	-6.10324478149414	-8.52573299407959	-8.1918306350708	-6.4325098991394	-5.08713054656982	-5.75444030761719	-2.98989582061768	-6.45339298248291	-7.51730823516846	-2.4743595123291	-8.64958381652832	-4.90509033203125	-3.35409069061279	-6.45629358291626	-6.29938507080078	-7.2267017364502	-8.32882690429688	-5.73746109008789
710	XP_011261591.1;E2AP90		0.623528	0.391273	-1.16494	-0.396009	tr|E2AP90|E2AP90_CAMFO Vacuolar proton pump subunit B OS=Camponotus floridanus (Florida carpenter ant) OX=104421 GN=EAG_05177 PE=3 SV=1	-3.07068157196045	-8.53049087524414	-0.909364700317383	-5.27187871932983	-9.81596660614014	2.1101188659668	-3.47137546539307	-2.97014713287354	-7.07515954971313	-3.31613636016846	-4.52178955078125	-1.53346824645996	-3.51868057250977	-0.73585319519043	1.11971950531006	-4.12023735046387	-7.45176792144775	-1.88693046569824	-5.92993116378784	0.163928985595703	1.06778049468994	-4.50405311584473	-2.60644817352295	-4.18516635894775	-1.94549751281738	-4.85626602172852	-0.541133880615234	-0.645752906799316
714	XP_011261637.1;E2APC4		1.75246	0.129043	2.00417	0.731932	tr|E2APC4|E2APC4_CAMFO Myosin-IA OS=Camponotus floridanus (Florida carpenter ant) OX=104421 GN=EAG_08849 PE=3 SV=1	-6.9714822769165	-1.77827548980713	-5.77046012878418	-2.32015800476074	-0.911874771118164	-5.27506828308105	-0.337422370910645	-1.49088954925537	-2.68660640716553	-5.89293193817139	-8.34425354003906	-3.32821846008301	-1.63763427734375	-3.16289138793945	-6.77079677581787	-9.81747817993164	-7.87659358978271	-1.57356071472168	-8.03065872192383	-3.27742862701416	-2.22175121307373	-2.08398056030273	-5.68564701080322	-6.10595607757568	-9.82303619384766	-5.81900882720947	-4.52194595336914	-4.35876560211182
737	E2AQI6;XP_011262241.1;XP_011262243.1;XP_011262250.1;XP_019884226.1;XP_011262249.1;XP_011262248.1;XP_011262247.1;XP_011262246.1;XP_011262245.1;XP_011262244.1		0.0956057	0.805729	-0.427275	-0.116331	tr|E2AQI6|E2AQI6_CAMFO Glucosamine--fructose-6-phosphate aminotransferase [isomerizing] 2 OS=Camponotus floridanus (Florida carpenter ant) OX=104421 GN=EAG_12078 PE=4 SV=1;|XP_011262241.1 uncharacterized protein LOC105254948 [Camponotus floridanus]	-4.58349704742432	-10.2066030502319	1.15402603149414	1.62061500549316	-8.51717662811279	0.724643707275391	-2.98183536529541	1.62493419647217	-0.847386360168457	0.139729499816895	0.0847644805908203	-1.70609664916992	-4.98014259338379	2.01135444641113	3.94493198394775	0.0445842742919922	-4.10625743865967	-7.88433313369751	0.972793579101563	-4.41666316986084	-1.28556346893311	-0.809452056884766	-3.04130458831787	-2.27149677276611	-0.63416862487793	-0.357154846191406	2.31379127502441	-2.95052433013916
763	E2ARJ0;XP_011262743.2		0.178957	0.760679	0.431026	0.1454	tr|E2ARJ0|E2ARJ0_CAMFO Guanine deaminase OS=Camponotus floridanus (Florida carpenter ant) OX=104421 GN=EAG_03375 PE=4 SV=1	-3.64166927337646	-8.87564563751221	0.454641342163086	-2.41730880737305	-0.972724914550781	1.49590110778809	2.11332035064697	-2.67860317230225	2.22678279876709	0.838191032409668	0.00958442687988281	-2.18667030334473	-0.181709289550781	0.339767456054688	-1.87746715545654	0.188106536865234	-5.12814807891846	-2.45265197753906	-3.8836727142334	-1.54916763305664	-2.2336950302124	-0.614818572998047	0.336092948913574	-0.955222129821777	-1.18805694580078	-3.0128059387207	2.16580581665039	0.695191383361816
773	XP_019884394.1;XP_011262974.1;E2ARX6		0.411044	0.492703	0.871632	0.292875	tr|E2ARX6|E2ARX6_CAMFO Voltage-dependent anion-selective channel OS=Camponotus floridanus (Flo	2.70123767852783	-0.22310733795166	2.02326965332031	3.29983901977539	1.47494125366211	2.18378067016602	2.84884929656982	1.05445384979248	0.213725090026855	2.91158390045166	0.791751861572266	3.82046890258789	3.96271514892578	2.6973762512207	1.18047618865967	2.63769912719727	1.05940723419189	3.24755477905273	5.06040000915527	1.97805023193359	-8.92510795593262	-0.0503787994384766	2.09537982940674	4.14994525909424	-1.06671333312988	0.529642105102539	3.55781936645508	2.10386562347412
790	XP_011263352.1;E2ASQ5		1.07357	0.1258	2.53453	0.755092	tr|E2ASQ5|E2ASQ5_CAMFO Uncharacterized protein OS=Camponotus floridanus (Florida carpenter ant) OX=104421 GN=EAG_16430 PE=4 SV=1	3.07310581207275	0.59666919708252	-4.26749420166016	1.78856468200684	0.332036972045898	-0.263143539428711	-0.945572853088379	-2.02549457550049	1.27196598052979	0.13393497467041	-1.25516510009766	-2.24783706665039	0.818246841430664	-1.24117279052734	1.88500308990479	-2.26099395751953	0.476119041442871	-9.427321434021	-9.94463920593262	-6.71216249465942	-0.799786567687988	-0.215824127197266	-8.21860408782959	0.271088600158691	1.47036933898926	-1.46741676330566	-3.46733093261719	-1.30320835113525
836	E2AV99;XP_011264553.1		0.569864	0.452	0.85758	0.312634	tr|E2AV99|E2AV99_CAMFO Tr-type G domain-containing protein OS=Camponotus floridanus (Florida carpenter ant) OX=104421 GN=EAG_16395 PE=4 SV=1;|XP_011264553.1 translation elongation factor 2 [Camponotus floridanus]	-3.71346569061279	-8.52192974090576	-2.03457641601563	-1.77725791931152	-1.58365631103516	-3.7941780090332	-8.46994018554688	-6.71411228179932	-7.48975658416748	-1.79320621490479	-1.44034767150879	-1.90425872802734	-1.97826957702637	-2.5844612121582	-6.15640735626221	-5.0867280960083	-2.91518878936768	-4.85909748077393	-6.47526359558105	-2.27874183654785	-8.49696636199951	-2.12235641479492	-9.41278171539307	-5.63002395629883	-0.325885772705078	-4.81669998168945	-1.9441967010498	-5.28519916534424
847	XP_011264892.1;XP_011264890.1;E2AVV1		0.238447	0.728598	0.47341	0.167367	tr|E2AVV1|E2AVV1_CAMFO Nucleoplasmin domain-containing protein OS=Camponotus floridanus (Florida carpe	2.56495761871338	0.253298759460449	1.91348838806152	3.68492317199707	2.07558631896973	1.39857482910156	3.30826473236084	1.25058460235596	2.31186199188232	3.22734355926514	2.23732948303223	1.10093879699707	5.60063552856445	2.32247352600098	3.76016330718994	4.99444961547852	1.04958820343018	0.692817687988281	3.1225757598877	-5.80035352706909	-2.08913516998291	2.20633125305176	4.54186534881592	3.61830997467041	2.67287063598633	2.60166549682617	3.83098220825195	1.42039012908936
879	E2AX77;XP_025264787.1;XP_025264786.1;XP_025264785.1;XP_025264784.1;XP_025264782.1;XP_011265555.2;XP_011265554.2;XP_011265551.2		1.42791	0.263667	1.48974	0.563768	tr|E2AX77|E2AX77_CAMFO Probable chitinase 1 OS=Camponotus floridanus (Florida carpenter ant) OX=104421 GN=EAG_01712 PE=4 SV=1;|XP_02526	-5.20835971832275	-3.70737552642822	-2.77489280700684	-4.37256050109863	-1.97981834411621	-5.43214797973633	-2.79459476470947	-2.05037784576416	-1.97960758209229	-4.87694835662842	-3.02473831176758	-4.80025482177734	-3.55280303955078	-5.47611618041992	-4.28080081939697	-7.7155385017395	-2.12435054779053	-2.86078453063965	-4.32100296020508	-3.65252876281738	-6.67055320739746	-3.12664031982422	-1.9570951461792	-8.69941234588623	-8.79189300537109	-5.25741100311279	-4.34435844421387	-9.08452987670898
923	E2AZ59;XP_011266628.1		1.11975	0.361639	-1.08779	-0.424251	tr|E2AZ59|E2AZ59_CAMFO Peptidase A1 domain-containing protein OS=Camponotus floridanus (Florida carpenter ant) OX=104421 GN=EAG_08757 PE=3 SV=1;|XP_011266628.1 lysosomal aspartic protease [Camponotus floridanus]	7.55853366851807	8.24218273162842	4.53158378601074	8.37539291381836	9.73271369934082	6.82373237609863	9.62858867645264	8.11330318450928	9.45519161224365	7.49249744415283	6.74549293518066	7.79496574401855	9.5292854309082	6.03493881225586	9.32261562347412	9.00588989257813	9.55714702606201	9.22761154174805	8.71433448791504	8.26107788085938	9.31394100189209	10.867525100708	7.70426082611084	8.9318380355835	9.51538848876953	8.94372177124023	6.56142997741699	9.36064052581787
931	XP_011266818.1;E2AZK6;XP_011266817.1		2.25088	0.0511111	-2.41024	-0.883636	tr|E2AZK6|E2AZK6_CAMFO Sulfatase domain-containing protein OS=Camponotus floridanus (Florida carpenter ant) OX=104421 GN=EAG_15528 PE=4 SV=1;|XP_011266817.1 arylsulfatase B isoform X1 [Campon	-0.773089408874512	-0.179213523864746	-3.10064315795898	-3.68316650390625	-1.73721313476563	-3.03485107421875	-0.28183650970459	-4.70872020721436	-0.62985897064209	-2.2035436630249	-1.45986747741699	-3.12178611755371	-3.35759925842285	-2.76660346984863	-0.443844795227051	1.76218414306641	-7.02557945251465	-1.59096717834473	0.423305511474609	0.185989379882813	1.7566385269165	3.65199661254883	-0.589356422424316	1.81177043914795	0.977058410644531	0.790603637695313	-0.850456237792969	1.8460054397583
943	XP_011267179.1;E2B0D3		1.14403	0.260432	1.57168	0.560947	tr|E2B0D3|E2B0D3_CAMFO Protein FAM151A OS=Camponotus floridanus (Florida carpenter ant) OX=104421 GN=EAG_12328 PE=4 SV=1	1.36160755157471	-0.0356149673461914	-0.377758026123047	-0.76649284362793	-0.65015983581543	-1.09494590759277	-0.709565162658691	0.438155174255371	1.0842981338501	1.83354091644287	-0.180353164672852	-0.481359481811523	-2.69387054443359	0.939098358154297	1.31235218048096	-0.62022590637207	-2.37035465240479	-0.613742828369141	-2.82406044006348	-2.17084884643555	-2.36162281036377	-2.44357109069824	-0.76948070526123	0.228068351745605	-10.5067434310913	-1.65446662902832	1.27423477172852	0.183527946472168
950	E2B123;XP_025270483.1;XP_011267482.1		0.0687847	0.871692	0.193305	0.063873	tr|E2B123|E2B123_CAMFO MFS domain-containing protein OS=Camponotus floridanus (Florida carpenter ant) OX=104421 GN=EAG_15098 PE=3 SV=1;|XP_011267482.1 facilitated treha	-6.95274591445923	-4.59786510467529	-0.861888885498047	-4.07976722717285	-2.03854942321777	-2.0509204864502	-1.6640043258667	-3.14500904083252	-1.19311809539795	-3.65877628326416	-2.25641441345215	-4.05631446838379	-3.8801155090332	-2.39831352233887	-9.29569244384766	0.779888153076172	-6.71218729019165	2.28012847900391	0.304702758789063	-5.38511180877686	-1.91620349884033	0.766244888305664	-1.7037935256958	-8.77460479736328	-6.29350185394287	-6.01591634750366	-3.2269401550293	-0.34708309173584
951	XP_011267538.1;E2B155		0.0407136	0.931579	-0.101968	-0.0352859	tr|E2B155|E2B155_CAMFO Angiotensin-converting enzyme OS=Camponotus floridanus (Florida carpenter ant) OX=104421 GN=EAG_03750 PE=3 SV=1	-5.52306127548218	-6.70248317718506	-4.28724479675293	-2.48326873779297	-2.57314300537109	-7.25687026977539	-5.555832862854	-3.95882892608643	-6.94530582427979	-5.77538204193115	-5.68430328369141	-4.09863471984863	-5.92920303344727	-5.09362411499023	-6.12306880950928	-6.06612968444824	-2.47483730316162	-9.28347110748291	-9.59161853790283	-4.12250709533691	-2.49302196502686	-4.07347679138184	-4.8726282119751	-2.8309850692749	-6.14056253433228	-1.61261367797852	-7.53809356689453	-3.2166166305542
958	XP_011267621.1;E2B1B7		0.447647	0.64866	-0.519026	-0.204086	tr|E2B1B7|E2B1B7_CAMFO Proactivator polypeptide OS=Camponotus floridanus (Florida carpenter ant) OX=104421 GN=EAG_12476 PE=4 SV=1	-1.53584575653076	-4.76005840301514	-4.16035079956055	-1.02675628662109	-2.09137344360352	-2.47002410888672	-2.10933971405029	-1.66167163848877	-1.06052494049072	-0.730481147766113	-3.16574096679688	-1.83503723144531	-1.97732734680176	-2.23465538024902	-0.566891670227051	-0.0263442993164063	-1.08860683441162	-1.16122245788574	0.244962692260742	-3.92880821228027	-5.79332065582275	-1.71558380126953	-1.3905725479126	-0.285151481628418	-2.50604629516602	-2.7469539642334	-1.72032737731934	-0.867949485778809
974	E2B227;XP_011267964.1		0.130621	0.81731	-0.357673	-0.117038	tr|E2B227|E2B227_CAMFO Tetraspanin OS=Camponotus floridanus (Florida carpenter ant) OX=104421 GN=EAG_04362 PE=3 SV=1;|XP_011267964.1 23 kDa integral membrane protein [Camponotus floridanus]	2.7174654006958	-3.62872982025146	0.901008605957031	0.0732860565185547	-0.0996074676513672	1.6663932800293	1.95401668548584	1.66684436798096	4.231032371521	0.993659019470215	0.968917846679688	0.91990852355957	-0.916269302368164	2.16724014282227	2.76979923248291	-2.3380298614502	-10.9226093292236	4.31828880310059	2.53132820129395	0.0998134613037109	3.85072994232178	4.16694068908691	3.92916965484619	4.18616008758545	1.75745391845703	0.694019317626953	2.73648452758789	0.843037605285645
1014	XP_011251109.1;E2A3W4		0.317383	0.577837	-0.728707	-0.242447	tr|E2A3W4|E2A3W4_CAMFO Vacuolar proton pump subunit d OS=Camponotus floridanus (Florida carpenter ant) OX=104421 GN=EAG_07201 PE=4 SV=1	-1.77066516876221	-5.92151880264282	-1.28282356262207	-6.47926378250122	-2.63162994384766	-1.94767189025879	-4.84084033966064	-3.38120937347412	0.804448127746582	-3.19061946868896	-1.57856178283691	-1.16934204101563	-8.55540943145752	-0.40009880065918	-3.57214641571045	-2.92556190490723	-0.552870750427246	-0.845188140869141	-2.04210472106934	0.960170745849609	-0.0317296981811523	-1.97052192687988	-2.06820774078369	-3.34762096405029	-6.61548757553101	-5.75841426849365	-1.13906097412109	-2.23455905914307
1021	XP_011251612.1;E2A4T7		0.608682	0.380055	1.11949	0.383138	tr|E2A4T7|E2A4T7_CAMFO Aa_trans domain-containing protein OS=Camponotus floridanus (Florida carpenter ant) OX=104421 GN=EAG_14243 PE=4 SV=1	-2.18020534515381	-8.63316917419434	-3.03842926025391	-2.44589233398438	0.221973419189453	-2.56694221496582	-6.00599527359009	-3.40171909332275	1.01918315887451	-2.51536846160889	-2.17535400390625	-0.581130981445313	-2.20586395263672	-1.25358009338379	-0.141701698303223	-8.19031524658203	-5.80869579315186	-0.872888565063477	-2.63858413696289	-4.95999145507813	-1.82271099090576	-1.61846923828125	-0.53902530670166	-1.48029804229736	-4.00830459594727	-10.6299533843994	-3.9907283782959	-4.73367023468018
1030	XP_011252500.2;E2A6T2		1.15576	0.364	-1.2074	-0.462384	|XP_011252500.2 protein CREG1 [Camponotus floridanus]	9.39067363739014	10.9811983108521	7.08158493041992	10.7500228881836	12.1469230651855	9.71318435668945	12.3233137130737	10.921591758728	12.1062517166138	9.78201580047607	9.14325523376465	11.0940380096436	11.6326446533203	8.36476516723633	11.4670667648315	11.1649875640869	12.7613000869751	11.8671722412109	11.2676563262939	11.7810649871826	11.9798135757446	13.1553401947021	10.0232439041138	11.3213777542114	12.5163326263428	12.3807067871094	8.76092910766602	11.8881349563599
1031	XP_011252932.2;E2A7K7		1.1008	0.39258	0.973541	0.38766	tr|E2A7K7|E2A7K7_CAMFO Apolipophorins OS=Camponotus floridanus (Florida carpenter ant) OX=104421 GN=EAG_00653 PE=4 SV=1	3.1637544631958	1.88701915740967	0.934259414672852	3.1961841583252	0.360395431518555	1.0148983001709	0.31849193572998	-0.0577421188354492	0.588528633117676	0.64441967010498	2.55824661254883	-0.581693649291992	0.578657150268555	0.664741516113281	-0.96019458770752	0.004425048828125	-0.0652666091918945	1.07299423217773	1.24699211120605	1.88669586181641	-0.997382164001465	-2.3777961730957	1.0833044052124	-0.142144203186035	-0.730218887329102	1.97432327270508	1.6024055480957	-1.95755481719971
1039	XP_011253495.1;E2A8P0		2.22596	0.14144	-1.81337	-0.710451	tr|E2A8P0|E2A8P0_CAMFO Deoxyribonuclease-2-alpha OS=Camponotus floridanus (Florida carpenter ant) OX=104421 GN=EAG_14030 PE=4 SV=1	2.13273525238037	3.86963939666748	0.671945571899414	4.8242244720459	6.13417625427246	3.53084564208984	5.2316255569458	5.10137844085693	5.48228740692139	4.02563190460205	2.33782005310059	3.27629661560059	4.94364356994629	2.90728759765625	6.61877346038818	5.20611572265625	6.25731563568115	4.95624542236328	5.31924057006836	5.98773765563965	6.33275127410889	7.85490226745605	5.52855014801025	5.58171939849854	6.38113021850586	5.12433242797852	3.0914306640625	5.61644268035889
1046	XP_011254210.2;XP_011254209.2;E2AA04		0.4085	0.450023	-1.00111	-0.320182	tr|E2AA04|E2AA04_CAMFO SERPIN domain-containing protein OS=Camponotus floridanus (Florida carp	-1.38490581512451	-1.31446933746338	-2.1922435760498	-1.05704116821289	-1.1403980255127	-2.23978233337402	-5.88475751876831	-1.83794498443604	-6.94522905349731	-2.74758052825928	-1.5534782409668	-3.29909133911133	-8.16922760009766	-2.5211238861084	-4.82907390594482	-1.25324249267578	-2.88233661651611	-5.93368530273438	-1.71793556213379	3.63168334960938	-5.96824073791504	-2.89759826660156	3.68463039398193	-1.61904430389404	-3.5167293548584	-2.5554313659668	-0.86265754699707	-1.55213642120361
1051	XP_011255281.1;E2AC28;E2AC29		0.62607	0.368339	-1.3009	-0.42676	tr|E2AC28|E2AC28_CAMFO GMC_OxRdtase_N domain-containing protein OS=Camponotus floridanus (Florida carpenter ant) OX=104421 GN=EAG_13496 PE=4 SV=1	1.97634220123291	5.03381824493408	-0.541679382324219	1.52490425109863	4.10118293762207	-0.942649841308594	2.83577823638916	4.46629047393799	3.92990970611572	1.55970859527588	-0.00958442687988281	2.87472915649414	-1.02061080932617	1.46372032165527	1.13795948028564	2.11498832702637	4.48093509674072	-2.84870147705078	0.44221305847168	6.77025985717773	5.36733913421631	1.67332458496094	5.08342456817627	2.32705783843994	7.08062362670898	3.67723655700684	2.3643913269043	5.79335689544678
1054	XP_011255562.2		0.378779	0.457034	0.998665	0.312668	|XP_011255562.2 peritrophin-48 [Camponotus floridanus]	-5.7232084274292	-2.06073093414307	1.28385925292969	-4.98401260375977	-0.707473754882813	1.41365432739258	-6.6806583404541	-2.14468097686768	-1.44931125640869	-3.57118701934814	-0.492395401000977	-4.91993713378906	-5.17737770080566	0	-1.2488431930542	-2.9349422454834	-1.86897754669189	-8.58548831939697	-3.09956932067871	-7.85115575790405	-2.65777683258057	-1.88908195495605	-5.46468830108643	-1.75868892669678	-1.85991096496582	-2.15343856811523	0.189828872680664	-8.01203727722168
1072	XP_011257736.2		0.856226	0.194519	2.24443	0.655322	|XP_011257736.2 leucine-rich repeat-containing G-protein coupled receptor 5-like [Camponotus floridanus]	1.36447048187256	2.71402072906494	-3.19990921020508	1.2206859588623	4.13848876953125	-3.75088500976563	3.62116527557373	-3.17401027679443	3.02856159210205	0.0910348892211914	-0.344738006591797	-7.587571144104	2.32577133178711	-1.26339912414551	3.51294612884521	-7.66889762878418	4.92503643035889	-4.06094932556152	1.35856437683105	-6.72946405410767	-2.06966686248779	-1.97631072998047	-2.83590793609619	-1.64793491363525	-1.98211669921875	-0.497161865234375	-4.67198753356934	-7.89454746246338
1074	XP_011257802.2;XP_011257800.2		0.957387	0.376923	-1.06073	-0.405018	|XP_011257800.2 regucalcin isoform X1 [Camponotus floridanus]	7.45058155059814	9.78308200836182	5.86322784423828	9.20467758178711	10.7621955871582	8.17463111877441	10.5986928939819	9.80642604827881	11.1557855606079	8.09212779998779	7.14289665222168	9.44867897033691	10.1913032531738	7.79310989379883	9.5929479598999	9.9250316619873	11.1307611465454	10.4798164367676	9.41473579406738	10.3212623596191	10.6796312332153	11.718635559082	8.25847911834717	9.00257396697998	11.5618076324463	10.4302196502686	7.68336868286133	10.1183462142944
1084	XP_011259278.2;E2AJM0;E2ANU0		1.35268	0.261053	-1.48122	-0.555667	tr|E2AJM0|E2AJM0_CAMFO COesterase domain-containing protein OS=Camponotus floridanus (Florida carpenter ant) OX=104421 GN=EAG_07773 PE=4 SV=1	5.05906581878662	7.60582637786865	1.55499839782715	5.78050231933594	2.38252639770508	3.55546569824219	7.34464740753174	1.25987148284912	6.69619846343994	4.09227085113525	2.2397289276123	5.75510025024414	5.12583923339844	0.71476936340332	6.81016445159912	5.35572052001953	7.46760272979736	6.95012283325195	2.8746280670166	6.96502685546875	6.54484844207764	3.40407562255859	5.3605489730835	5.8135347366333	5.89770126342773	7.88250541687012	3.07351112365723	5.50390911102295
1085	XP_011259279.2		0.026855	0.966537	0.056084	0.0205338	|XP_011259279.2 venom carboxylesterase-6 [Camponotus floridanus]	0.915169715881348	2.82013416290283	-0.871763229370117	2.08183860778809	3.70263671875	-0.718990325927734	3.55270481109619	3.41119861602783	1.82538890838623	1.79258441925049	0.821304321289063	1.18518829345703	2.07121849060059	0.293794631958008	3.29439830780029	1.37994384765625	3.22385692596436	2.47275924682617	1.75486373901367	2.83013725280762	2.18928241729736	-1.62957382202148	0.369635581970215	1.77614498138428	2.07536888122559	1.49641609191895	-2.15358352661133	3.01758289337158
1086	XP_011259281.2		0.439601	0.60564	-0.599114	-0.227276	|XP_011259281.2 uncharacterized protein LOC105253145 [Camponotus floridanus]	6.77728748321533	8.6435079574585	4.77125930786133	7.98680305480957	9.96528816223145	7.2215747833252	9.55210590362549	8.80768489837646	9.58809757232666	7.53232479095459	6.00905990600586	8.47966575622559	9.39525604248047	5.90741539001465	8.65425205230713	8.33988189697266	10.4770269393921	9.49000930786133	8.35657691955566	8.11709213256836	8.97016429901123	10.2801342010498	7.15203762054443	8.3314962387085	9.08841133117676	7.93628120422363	5.75305557250977	8.07850933074951
1087	XP_011259391.1;XP_011259390.1;E2AJT8		0.668014	0.391622	1.05511	0.375618	tr|E2AJT8|E2AJT8_CAMFO Glyco_18 domain-containing protein OS=Camponotus floridanus (Florida carpen	-0.0495615005493164	-0.811984062194824	0.593294143676758	1.12089729309082	-6.4652419090271	0.163785934448242	-1.62642002105713	-7.71853494644165	-1.18203449249268	-0.977463722229004	1.46105766296387	-1.94950294494629	-2.51094436645508	0.830425262451172	-2.0750093460083	-3.63885498046875	-0.44725513458252	-8.70272541046143	-7.53419065475464	2.93259620666504	-1.58600902557373	-9.26961135864258	0.524371147155762	-1.97480487823486	1.85873603820801	-2.93377304077148	-0.124507904052734	-0.922696113586426
1095	XP_011261310.1;XP_011261309.1;XP_011261308.1;XP_011261307.1;XP_011261306.1;E2ANL8		0.543196	0.360143	1.44455	0.437865	|XP_011261308.1 calci	0.00988292694091797	-9.43727397918701	-3.20626068115234	-1.45773124694824	-0.405303955078125	-2.51006126403809	-4.00327014923096	-1.32268619537354	-1.50388050079346	-3.48168087005615	-1.00213623046875	0.400703430175781	-0.104545593261719	-2.19973945617676	-3.64830303192139	-0.485645294189453	-0.664973258972168	-2.70804405212402	1.7739372253418	-7.36850929260254	-7.36491203308105	-7.61161375045776	-4.39214038848877	1.10404491424561	-3.50830268859863	-10.1823244094849	-2.91355133056641	-2.47738170623779
1100	XP_011261898.2		0.108608	0.811795	0.392663	0.116558	|XP_011261898.2 alpha-glucosidase [Camponotus floridanus]	-4.14953899383545	-7.03344345092773	3.45616722106934	-4.28369331359863	-4.25294876098633	-1.94603157043457	-8.42427062988281	-2.70137310028076	-2.57913112640381	-2.73733043670654	0.941614151000977	1.07090759277344	-3.2000904083252	-0.596502304077148	-8.86435317993164	-0.264932632446289	-5.06290340423584	3.20644760131836	-3.65401458740234	-0.620574951171875	-2.032301902771	-9.58644390106201	-0.255133628845215	-8.47798347473145	0.660747528076172	-0.424737930297852	-2.1727180480957	-4.38403987884521
1109	XP_025263304.1;XP_011263078.2		1.03522	0.367556	-1.07564	-0.415028	|XP_011263078.2 alpha-amylase 1 isoform X1 [Camponotus floridanus]	6.02754497528076	7.89356899261475	4.14129257202148	7.54902267456055	9.2847900390625	4.33240127563477	8.43472385406494	8.60688304901123	8.64079761505127	7.31191349029541	6.32754135131836	7.2652759552002	7.58726501464844	5.63230133056641	8.29647159576416	7.41704177856445	9.130784034729	7.67404937744141	7.23735237121582	8.82621574401855	9.31789684295654	9.09663009643555	7.74724674224854	7.86743068695068	9.6250114440918	7.91410064697266	5.54425239562988	8.39986515045166
1120	XP_011263888.2;E2ATY3		0.532251	0.440049	-0.967436	-0.335461	tr|E2ATY3|E2ATY3_CAMFO Vacuolar proton pump subunit E OS=Camponotus floridanus (Florida carpenter ant) OX=104421 GN=EAG_07792 PE=3 SV=1	-2.03552913665771	-2.01882266998291	-0.873483657836914	-3.11544036865234	-3.21733856201172	-1.95127868652344	-6.24565267562866	-7.2011284828186	-1.19468593597412	-2.34744167327881	-2.48626899719238	-2.34541320800781	-7.94921493530273	-0.01495361328125	-0.00490665435791016	-3.1087760925293	-0.887703895568848	-3.69692039489746	-3.83870697021484	-0.688549041748047	1.39199733734131	-5.65057229995728	-0.479870796203613	-2.06146907806396	-7.45699024200439	-2.37747192382813	-0.112850189208984	-0.479758262634277
1121	XP_011264019.1;E2AU75		0.37279	0.526894	0.808084	0.271295	tr|E2AU75|E2AU75_CAMFO Myosin_tail_1 domain-containing protein OS=Camponotus floridanus (Florida carpenter ant) OX=104421 GN=EAG_00727 PE=4 SV=1	-1.12415981292725	-4.43956089019775	0.338388442993164	-2.07380867004395	-2.30031776428223	-0.541175842285156	-6.7028284072876	-3.38011264801025	-1.30098628997803	-4.11430644989014	-2.51977348327637	-1.81036376953125	-2.02787780761719	-1.15318870544434	-2.16189479827881	-1.0020751953125	-0.757447242736816	-8.19635486602783	0.0981426239013672	-4.07171058654785	-7.19863700866699	-7.81935405731201	-1.59327220916748	-1.43119144439697	-1.33075332641602	-9.65625381469727	2.72600364685059	-2.06845188140869
1125	XP_011264385.1		1.66664	0.233576	1.54458	0.59601	|XP_011264385.1 multidrug resistance-associated protein 1 isoform X3 [Camponotus floridanus]	-4.72336673736572	-8.82225799560547	-3.52568626403809	-4.71160125732422	-4.06563758850098	-4.56827735900879	-4.81305599212646	-5.32082080841064	-4.04159641265869	-5.35224628448486	-4.41432952880859	-3.21352767944336	-4.10562324523926	-2.85379791259766	-4.09916019439697	-7.81954479217529	-3.96372509002686	-5.81296348571777	-6.20929527282715	-3.87562274932861	-9.65969562530518	-9.26141834259033	-2.91504764556885	-6.3009557723999	-7.05893993377686	-7.25990629196167	-4.10050773620605	-7.81917381286621
1127	XP_019884712.1;XP_011264422.1		0.0745326	0.844	0.299392	0.0861546	|XP_011264422.1 annexin B9-like isoform X1 [Camponotus floridanus]	-0.998242378234863	-8.0192403793335	1.39991188049316	-1.8615894317627	-7.76207971572876	1.7249755859375	-11.0806140899658	-4.06554698944092	-8.42118835449219	-3.92894840240479	-1.37722778320313	-5.32751846313477	-8.86124229431152	0.337942123413086	-1.05053424835205	-4.92966842651367	-7.86132860183716	-9.04269981384277	-8.6646614074707	-3.42676448822021	-2.91017436981201	-1.7479248046875	-2.22859287261963	-4.33704090118408	-7.55942964553833	-4.38615226745605	-1.07356452941895	-3.21356678009033
1130	XP_011264740.1;E2AVJ5		0.530564	0.543326	0.692963	0.263015	|XP_011264740.1 transferrin [Camponotus floridanus]	-0.00988292694091797	-1.97830295562744	-3.64430046081543	-0.796878814697266	-3.33218002319336	-4.25802040100098	-3.23527050018311	-1.68845462799072	-4.35681819915771	-3.52242755889893	-2.40872192382813	-5.69838666915894	-6.88354921340942	-3.08271789550781	-3.17152118682861	-2.62075233459473	-6.78201723098755	-3.1263313293457	-3.69727325439453	-2.26382827758789	-4.92428970336914	-6.44535684585571	-1.42130565643311	-2.86611461639404	-3.15403175354004	-3.26657676696777	-5.22558212280273	-5.63241052627563
1144	XP_011266004.2		0.0216922	0.9632	0.0554354	0.0191822	|XP_011266004.2 venom serine carboxypeptidase-like [Camponotus floridanus]	4.64937114715576	5.995530128479	0.861894607543945	4.52692031860352	-9.49177169799805	-4.0271053314209	3.11251163482666	3.99972820281982	4.19627475738525	3.48066234588623	2.84531784057617	3.31072425842285	2.45217895507813	0.293584823608398	4.24663066864014	3.25296974182129	4.19875431060791	3.92254829406738	-8.60413646697998	3.66681289672852	2.26321697235107	-3.05568504333496	2.58662891387939	3.84534740447998	3.48793411254883	3.02572250366211	0	2.59298229217529
1145	XP_011266010.1;E2AY02		0.165467	0.823836	0.264706	0.100491	tr|E2AY02|E2AY02_CAMFO Carboxypeptidase OS=Camponotus floridanus (Florida carpenter ant) OX=104421 GN=EAG_12710 PE=3 SV=1	6.27827548980713	8.38095188140869	4.01681137084961	7.80939102172852	8.95368003845215	4.5363597869873	8.83969783782959	7.2741117477417	8.85764408111572	7.02460765838623	5.89632415771484	6.95823287963867	7.87807273864746	5.3931770324707	7.36516284942627	6.91082954406738	8.48924541473389	8.51788330078125	7.1873664855957	6.6245231628418	7.33032512664795	4.61638450622559	5.91422557830811	7.28126621246338	7.5948429107666	6.60824394226074	3.36755180358887	6.58360767364502
1146	XP_011266069.1;E2AY28		1.72573	0.262235	-1.4593	-0.57363	tr|E2AY28|E2AY28_CAMFO Uncharacterized protein OS=Camponotus floridanus (Florida carpenter ant) OX=104421 GN=EAG_05928 PE=4 SV=1	9.09066295623779	10.2010889053345	6.3117790222168	9.99505233764648	11.7702140808105	9.13648986816406	10.8710660934448	10.3386754989624	11.0288820266724	9.12868404388428	8.30283164978027	10.2398891448975	10.7842559814453	7.63715744018555	10.5680379867554	10.8977336883545	11.511212348938	11.4056987762451	10.730318069458	11.9706649780273	11.673264503479	12.7337894439697	9.76575183868408	10.6945772171021	11.7857227325439	11.4805793762207	8.6453742980957	11.4041833877563
1148	XP_011266190.1;E2AYB4		1.82408	0.103789	-2.20812	-0.791932	tr|E2AYB4|E2AYB4_CAMFO Vitellogenin domain-containing protein OS=Camponotus floridanus (Florida carpenter ant) OX=104421 GN=EAG_04079 PE=4 SV=1	-2.60827922821045	-7.37905550003052	-5.31052589416504	-8.76286125183105	-2.94657707214355	-8.38411426544189	-10.003867149353	-2.99781513214111	-2.38644313812256	-3.7589807510376	-3.84670257568359	-2.65868377685547	-8.93960094451904	-8.1737117767334	-2.11509609222412	-3.23078346252441	-1.17980098724365	-9.8117504119873	-2.13210296630859	-3.39918613433838	-2.29722499847412	-2.00206756591797	-5.48993015289307	-3.19559001922607	-2.5319709777832	-1.98696327209473	-5.89950370788574	-1.97162914276123
1152	XP_011266630.1;E2AZ60		0.059483	0.930576	0.0992838	0.0381247	tr|E2AZ60|E2AZ60_CAMFO Peptidase A1 domain-containing protein OS=Camponotus floridanus (Florida carpenter ant) OX=104421 GN=EAG_08758 PE=3 SV=1	6.1032133102417	6.73293399810791	2.41383171081543	6.6771411895752	8.89348793029785	5.88865661621094	7.82207012176514	7.66201114654541	8.72762775421143	6.29940509796143	4.94510650634766	7.22956275939941	7.68449401855469	5.18473052978516	6.71426677703857	6.09744071960449	7.33755779266357	5.86215972900391	5.71554374694824	7.20513153076172	8.151442527771	8.14318084716797	5.80049610137939	5.24791812896729	7.63959693908691	6.36186027526855	4.49313735961914	6.104567527771
[truncated: 38 more rows]

## Sheet: Nurse vs. forager Student's T
id	Protein IDs	Significant	-Log p-value	q-value	Difference	Test statistic	Fasta headers	LabSinIndFor22f	LabSinIndFor22g	LabSinIndFor22h	LabSinIndFor22i	LabSinIndFor22j	LabSinIndFor23f	LabSinIndFor23g	LabSinIndFor23h	LabSinIndFor23i	LabSinIndFor23j	LabSinIndFor25f	LabSinIndFor25g	LabSinIndFor25h	LabSinIndFor25i	LabSinIndFor25j	LabSinIndFor26f	LabSinIndFor26g	LabSinIndFor26h	LabSinIndFor26i	LabSinIndFor26j	LabSinIndNur22a	LabSinIndNur22b	LabSinIndNur22c	LabSinIndNur22d	LabSinIndNur22e	LabSinIndNur23a	LabSinIndNur23b	LabSinIndNur23c	LabSinIndNur23d	LabSinIndNur23e	LabSinIndNur25a	LabSinIndNur25b	LabSinIndNur25c	LabSinIndNur25d	LabSinIndNur25e	LabSinIndNur26a	LabSinIndNur26b	LabSinIndNur26c	LabSinIndNur26d	LabSinIndNur26e
[truncated: 136 more rows]

[truncated: 2 more sheets: Individ ANOVA colony, Individ twoway ANOVA col & role]
