# Supplementary material for: Biomarkers in a socially exchanged fluid reflect colony maturity, behavior, and distributed metabolism
Source: eLife. 2021 Nov 2;10:e74005. doi: 10.7554/eLife.74005 (PMC8608388; doi:10.7554/eLife.74005)
Supplement: Supplementary file 4. — For the empirical Bayes LIMMA models, results are shared as raw output tables. [file elife-74005-supp4.xlsx]

## Sheet: Summary
Supplemental file 4: Full empirical Bayes statistical results
These supplemental files share the full results of all the models run. For the classical frequentist models (Supplemental File 3), the imputed data are also shared. For the empirical Bayes LIMMA models (Supplemental File 4) results are shared as raw output tables. Accuracy, seed, and mean feature importances for each gene are reported for each model trained for the random forest analyses in Suppl…
Yvm			NvF			FvL
id	Uniprot	logFC	id	Uniprot	logFC	id	Uniprot	logFC	id	Uniprot	logFC
62	E1ZUV1	-0.937368	62	E1ZUV1	-0.445149	62	E1ZUV1	-0.278959	62	E1ZUV1	0.181366		0
66	E1ZV08	-0.286431	66	E1ZV08	1.11987	66	E1ZV08	0.550681	66	E1ZV08	-0.0517592		0
69	E1ZV54	-0.893468	69	E1ZV54	-0.95103	69	E1ZV54	-0.973956	69	E1ZV54	0.233193		0
70	E1ZVB4	-0.479746	70	E1ZVB4	0.706379	70	E1ZVB4	0.624977	70	E1ZVB4	0.10422		0
71	E1ZVC0	0.579036	71	E1ZVC0	0.198523	71	E1ZVC0	0.117733	71	E1ZVC0	0.29072		0
75	E1ZVE4	0.826641	75	E1ZVE4	-0.428475	75	E1ZVE4	0.309822	75	E1ZVE4	0.538968		0
84	E1ZVU8	0.0340093	84	E1ZVU8	0.851613	84	E1ZVU8	0.415184	84	E1ZVU8	0.111097		0
91	E1ZWI0	-0.129014	91	E1ZWI0	-0.209744	91	E1ZWI0	0.558579	91	E1ZWI0	0.345126		0
95	E1ZWP1	0.562993	95	E1ZWP1	0.348227	95	E1ZWP1	0.0897438	95	E1ZWP1	-0.845479		0
96	E1ZWP8	0.284958	96	E1ZWP8	0.548468	96	E1ZWP8	-2.74611	96	E1ZWP8	0.827071		0
98	E1ZWT5	0.154377	98	E1ZWT5	0.657588	98	E1ZWT5	0.0380494	98	E1ZWT5	-0.579999		0
102	E1ZX35	0.237047	102	E1ZX35	0.510582	102	E1ZX35	-2.69668	102	E1ZX35	-1.06987		0
104	E1ZX53	0.523566	104	E1ZX53	0.676845	104	E1ZX53	0.27305	104	E1ZX53	-0.354387		0
106	E1ZX82	0.937685	106	E1ZX82	-0.390243	106	E1ZX82	0.873901	106	E1ZX82	-0.113993		0
114	E1ZXJ7	-1.29238	114	E1ZXJ7	-2.17958	114	E1ZXJ7	-1.69083	114	E1ZXJ7	0.0274571		0
116	E1ZXM8	0.48933	116	E1ZXM8	0.812744	116	E1ZXM8	1.34733	116	E1ZXM8	0.744417		0
117	E1ZXR7	-1.08383	117	E1ZXR7	-3.31356	117	E1ZXR7	-2.27651	117	E1ZXR7	-1.10294		0
125	E1ZXZ4	0.372558	125	E1ZXZ4	1.3262	125	E1ZXZ4	0.82211	125	E1ZXZ4	0.912021		0
127	E1ZXZ8	0.0618833	127	E1ZXZ8	0.99652	127	E1ZXZ8	-0.553018	127	E1ZXZ8	-0.145144		0
129	E1ZY18	-0.464263	129	E1ZY18	0.137261	129	E1ZY18	0.487837	129	E1ZY18	1.19231		0
130	E1ZY32	-0.468554	130	E1ZY32	-3.74291	130	E1ZY32	0.222586	130	E1ZY32	-0.251055		0
138	E1ZYQ1	0.0606778	138	E1ZYQ1	0.19375	138	E1ZYQ1	0.428742	138	E1ZYQ1	0.0246684		0
142	E1ZYX6	0.648785	142	E1ZYX6	1.31527	142	E1ZYX6	1.11502	142	E1ZYX6	0.832328		0
145	E1ZYZ4	-0.185704	145	E1ZYZ4	0.578948	145	E1ZYZ4	0.746155	145	E1ZYZ4	0.105249		0
148	E1ZZ63	0.780555	148	E1ZZ63	0.455902	148	E1ZZ63	0.430691	148	E1ZZ63	0.68326		0
154	E1ZZF6	-0.795868	154	E1ZZF6	-1.18399	154	E1ZZF6	-0.519268	154	E1ZZF6	-0.242588		0
156	E1ZZJ4	0.919569				156	E1ZZJ4	0.47015	156	E1ZZJ4	0.323408		0
157	E1ZZT0	0.417923	157	E1ZZT0	1.32013	157	E1ZZT0	-1.18456	157	E1ZZT0	-1.55326		0
159	E1ZZT5	-0.10825	159	E1ZZT5	0.538706	159	E1ZZT5	-0.405206	159	E1ZZT5	1.04789		0
163	E1ZZX0	0.326424	163	E1ZZX0	-1.57569	163	E1ZZX0	-1.7109	163	E1ZZX0	-0.888941		0
164	E1ZZY1	0.0396943	164	E1ZZY1	1.24906	164	E1ZZY1	-0.343731	164	E1ZZY1	-0.0159611		0
166	E2A031	-0.672319	166	E2A031	0.718824	166	E2A031	-0.560824	166	E2A031	0.273698		0
167	XP_011268636	-0.0256143	167	XP_011268636	0.582823	167	XP_011268636	0.889258	167	XP_011268636	0.91002		0
168	E2A057	-0.232495	168	E2A057	0.911731	168	E2A057	-0.624205	168	E2A057	0.597247		0
170	E2A062	-0.341393	170	E2A062	-0.459149	170	E2A062	0.278977	170	E2A062	1.14724		0
171	E2A097	-0.0664533	171	E2A097	-0.674934	171	E2A097	0.378612	171	E2A097	-0.0123624		0
178	E2A0E7	0.16575	178	E2A0E7	1.2862	178	E2A0E7	0.712011	178	E2A0E7	0.134446		0
179	E2A0I0	-0.548785	179	E2A0I0	-0.32775	179	E2A0I0	-0.734583	179	E2A0I0	-0.183187		0
180	E2AUU4	1.54923	180	E2AUU4	0.236114	180	E2AUU4	-0.374734	180	E2AUU4	-0.291904		0
181	E2AUU5	-0.048727	181	E2AUU5	-1.52248	181	E2AUU5	-2.18517	181	E2AUU5	-0.541361		0
182	E2A0J1	0.427556	182	E2A0J1	0.192031	182	E2A0J1	-1.31118	182	E2A0J1	-0.529507		0
187	E2A0Q8	-0.308241	187	E2A0Q8	-0.325227	187	E2A0Q8	0.487804	187	E2A0Q8	-0.297575		0
195	E2A162	0.0114331	195	E2A162	0.911331	195	E2A162	0.178454	195	E2A162	0.512221		0
203	E2A1E3	0.887963				203	E2A1E3	0.562103	203	E2A1E3	0.625008		0
204	E2A1F7	-0.143533	204	E2A1F7	-1.09869	204	E2A1F7	-0.477422	204	E2A1F7	0.267714		0
205	E2A1H1	0.878806	205	E2A1H1	0.296134	205	E2A1H1	0.992915	205	E2A1H1	0.905138		0
208	E2A1K5	0.383623	208	E2A1K5	0.526373	208	E2A1K5	0.374795	208	E2A1K5	0.893126		0
211	E2A1P1	-0.0501467	211	E2A1P1	1.78255	211	E2A1P1	0.623991	211	E2A1P1	0.0309121		0
212	E2A1Q0	0.438501	212	E2A1Q0	-1.78326	212	E2A1Q0	0.461731	212	E2A1Q0	-0.492796		0
213	E2A1T0	-1.73776	213	E2A1T0	-0.410796	213	E2A1T0	0.157059	213	E2A1T0	0.0925309		0
219	E2A225	-0.393734	219	E2A225	0.136763	219	E2A225	-0.313923	219	E2A225	1.53496		0
220	E2A226	1.27126				220	E2A226	1.11206	220	E2A226	0.673227		0
222	E2A252	0.878216	222	E2A252	-1.36472	222	E2A252	0.11935	222	E2A252	0.351457		0
225	E2A2D3	0.192038	225	E2A2D3	1.37445	225	E2A2D3	0.397411	225	E2A2D3	0.885088		0
226	E2A2D8	-0.455679	226	E2A2D8	-3.52795	226	E2A2D8	-0.903672	226	E2A2D8	0.871424		0
236	E2A358	0.234442	236	E2A358	-0.429684	236	E2A358	0.344734	236	E2A358	-0.014858		0
238	E2A3F2	0.907733	238	E2A3F2	0.903557	238	E2A3F2	0.504723	238	E2A3F2	-0.823247		0
240	E2A3I0	0.113714	240	E2A3I0	-0.384897	240	E2A3I0	-0.190087	240	E2A3I0	-0.94075		0
245	E2A3N8	0.665287	245	E2A3N8	0.429422	245	E2A3N8	-0.517553	245	E2A3N8	-0.272188		0
247	E2A3P2	0.267754	247	E2A3P2	-1.21489	247	E2A3P2	0.319465	247	E2A3P2	0.707999		0
250	E2A3T5	0.0852886	250	E2A3T5	-0.825654	250	E2A3T5	0.907134	250	E2A3T5	-0.654079		0
251	E2A3Z5	0.460801	251	E2A3Z5	0.899346	251	E2A3Z5	0.611175	251	E2A3Z5	-0.245466		0
252	E2A429	-0.229784	252	E2A429	-0.757879	252	E2A429	-0.829754	252	E2A429	0.736673		0
254	E2A452	-0.613807	254	E2A452	-0.179972	254	E2A452	-0.0783779	254	E2A452	0.0527745		0
256	E2A481	-0.0614122	256	E2A481	0.429145	256	E2A481	0.143431	256	E2A481	0.369861		0
257	E2A4D2	0.68045	257	E2A4D2	1.74484	257	E2A4D2	0.710791	257	E2A4D2	0.864906		0
260	E2A4H1	-0.151516	260	E2A4H1	1.15278	260	E2A4H1	0.976138	260	E2A4H1	0.882561		0
261	E2A4H5	0.118204	261	E2A4H5	0.462478	261	E2A4H5	-1.85856	261	E2A4H5	-0.388505		0
263	E2A4J2	0.373066	263	E2A4J2	-0.492542	263	E2A4J2	0.426635	263	E2A4J2	-0.528155		0
268	E2A4N5	-0.382158	268	E2A4N5	1.7241	268	E2A4N5	-0.981482	268	E2A4N5	0.395564		0
270	E2A4Q4	-0.371475	270	E2A4Q4	0.108151	270	E2A4Q4	-0.214741	270	E2A4Q4	-0.493035		0
271	E2A4R0	0.153813	271	E2A4R0	-0.104853	271	E2A4R0	1.56121	271	E2A4R0	0.572864		0
272	E2A4R1	-0.153453	272	E2A4R1	0.583977	272	E2A4R1	0.148575	272	E2A4R1	-0.246768		0
273	E2A4U9	-1.43306	273	E2A4U9	-0.156052	273	E2A4U9	-0.0547272	273	E2A4U9	1.03021		0
275	E2A4X8	-1.05322	275	E2A4X8	-2.98269	275	E2A4X8	-0.178976	275	E2A4X8	0.0646856		0
277	E2A543	-0.972221	277	E2A543	-2.28607	277	E2A543	-3.20441	277	E2A543	0.700434		0
278	E2A599	0.816838	278	E2A599	1.01778	278	E2A599	0.354949	278	E2A599	-0.0874919		0
279	E2A5A3	0.262429	279	E2A5A3	-0.191273	279	E2A5A3	0.21539	279	E2A5A3	0.614885		0
280	E2A5A6	0.349297				280	E2A5A6	0.853136	280	E2A5A6	0.419296		0
281	E2A5C4	0.743313	281	E2A5C4	0.946203	281	E2A5C4	-0.584684	281	E2A5C4	-0.431439		0
282	E2A5G4	-1.18048	282	E2A5G4	-2.3475	282	E2A5G4	-0.392384	282	E2A5G4	-0.545053		0
283	E2A5M2	-0.284422	283	E2A5M2	1.33289	283	E2A5M2	-0.195901	283	E2A5M2	0.746525		0
288	E2A5R3	-0.0075845	288	E2A5R3	-1.20507	288	E2A5R3	-0.829183	288	E2A5R3	-0.895742		0
289	E2A5S9	0.403056							289	E2A5S9	0.47758		0
291	E2A5W9	-0.236324	291	E2A5W9	-1.07504	291	E2A5W9	-1.24959	291	E2A5W9	-2.22906		0
296	E2A665	0.292582	296	E2A665	-2.12281	296	E2A665	-0.262993	296	E2A665	-0.752988		0
300	E2A6C9	-1.50502	300	E2A6C9	0.747473	300	E2A6C9	-2.00693	300	E2A6C9	-1.23701		0
302	E2A6H4	0.0291587	302	E2A6H4	0.254699	302	E2A6H4	1.09983	302	E2A6H4	0.650025		0
303	E2A6I4	0.288737	303	E2A6I4	-1.32377	303	E2A6I4	0.699779	303	E2A6I4	-2.04068		0
305	E2A6N1	-0.239164	305	E2A6N1	-3.69651	305	E2A6N1	-1.66326	305	E2A6N1	-1.45163		0
307	E2A6R7	0.166462	307	E2A6R7	0.564993	307	E2A6R7	-0.291724	307	E2A6R7	-0.319292		0
310	E2A6U2	-0.232232	310	E2A6U2	1.32569	310	E2A6U2	-0.11413	310	E2A6U2	0.554751		0
311	E2A6U3	0.356017	311	E2A6U3	-1.39527	311	E2A6U3	-0.727744	311	E2A6U3	0.0758599		0
312	XP_0112	0.285459	312	XP_0112	0.684293	312	XP_0112	1.27096	312	XP_0112	0.051362		0
313	E2A6W8	-1.18933	313	E2A6W8	-2.37994	313	E2A6W8	-1.25881	313	E2A6W8	0.149755		0
317	E2A701	0.249748				317	E2A701	1.55802	317	E2A701	1.46096		0
328	E2A7M9	1.05841	328	E2A7M9	0.164426	328	E2A7M9	0.725762	328	E2A7M9	-0.353886		0
333	E2A7Y1	0.46091	333	E2A7Y1	-0.948582	333	E2A7Y1	-1.02081	333	E2A7Y1	-1.33124		0
334	E2A7Y2	0.810639	334	E2A7Y2	0.354337	334	E2A7Y2	0.530125	334	E2A7Y2	0.126443		0
337	E2A7Z9	-0.16949	337	E2A7Z9	-0.535139	337	E2A7Z9	-0.453028	337	E2A7Z9	0.604156		0
338	E2A849	0.127596	338	E2A849	0.523125	338	E2A849	-0.307815	338	E2A849	0.19369		0
340	E2A880	-0.919994	340	E2A880	1.4761	340	E2A880	0.441155	340	E2A880	0.672759		0
342	E2A8B3	0.730724	342	E2A8B3	0.537551	342	E2A8B3	-0.0942036	342	E2A8B3	-1.22844		0
345	E2A8M5	-0.722622	345	E2A8M5	-1.89276	345	E2A8M5	-0.537383	345	E2A8M5	0.21278		0
348	E2A8R8	-0.182449	348	E2A8R8	-1.13306	348	E2A8R8	0.305198	348	E2A8R8	-0.978735		0
349	E2A8S3	0.104873	349	E2A8S3	0.417661	349	E2A8S3	0.324849	349	E2A8S3	0.478456		0
350	E2A8S5	0.184638	350	E2A8S5	1.15655	350	E2A8S5	-0.293265	350	E2A8S5	0.889399		0
353	E2A8V7	-0.609429	353	E2A8V7	0.444397	353	E2A8V7	-0.759776	353	E2A8V7	0.0675929		0
354	E2A8Y6	0.248778	354	E2A8Y6	-2.32069	354	E2A8Y6	-3.16286	354	E2A8Y6	-2.35866		0
355	E2A915	-0.0989266	355	E2A915	-1.88909	355	E2A915	0.350436	355	E2A915	0.155646		0
357	E2A931	1.05783	357	E2A931	0.315561	357	E2A931	0.936014	357	E2A931	-0.156155		0
361	E2A952	0.0719143	361	E2A952	1.46361	361	E2A952	0.24207	361	E2A952	0.472169		0
365	E2A9D3	0.515743	365	E2A9D3	-0.709438	365	E2A9D3	-0.0314062	365	E2A9D3	-0.301278		0
367	E2A9H0	0.131865				367	E2A9H0	0.272449	367	E2A9H0	0.677057		0
368	E2A9I6	0.327025	368	E2A9I6	-0.558394	368	E2A9I6	0.447788	368	E2A9I6	0.472604		0
370	E2A9P2	0.158063	370	E2A9P2	1.11017	370	E2A9P2	-0.641437	370	E2A9P2	-1.46264		0
371	E2A9P3	0.399105	371	E2A9P3	0.173427	371	E2A9P3	-0.680476	371	E2A9P3	0.41678		0
382	E2A9Z9	0.0662815	382	E2A9Z9	-0.293317	382	E2A9Z9	0.0486864	382	E2A9Z9	-0.651876		0
387	E2AA51	0.555658	387	E2AA51	-0.704081	387	E2AA51	1.68359	387	E2AA51	0.924696		0
390	E2AAA4	-0.678203	390	E2AAA4	-0.363822	390	E2AAA4	0.850147	390	E2AAA4	0.794301		0
393	E2AAF9	-0.447073	393	E2AAF9	0.589127	393	E2AAF9	1.12579	393	E2AAF9	-0.930098		0
394	E2AAG3	0.584105	394	E2AAG3	0.501773	394	E2AAG3	-0.335275	394	E2AAG3	0.505096		0
397	E2AAH6	0.578583	397	E2AAH6	0.342955	397	E2AAH6	1.0894	397	E2AAH6	0.0138882		0
398	E2AAH7	0.646855	398	E2AAH7	0.0976958	398	E2AAH7	1.96435	398	E2AAH7	-0.0493586		0
399	E2AAI3	0.14765	399	E2AAI3	-0.279881	399	E2AAI3	0.137554	399	E2AAI3	0.487127		0
406	E2AAQ1	0.224458	406	E2AAQ1	-0.552749	406	E2AAQ1	-0.381808	406	E2AAQ1	-0.371542		0
409	E2AAT2	0.929011	409	E2AAT2	1.21172	409	E2AAT2	0.598509	409	E2AAT2	-1.0643		0
410	NA	0.0242312	410	NA	1.07546	410	NA	0.574214	410	NA	1.24028		0
411	E2AB03	0.214374	411	E2AB03	0.734807	411	E2AB03	0.0159604	411	E2AB03	0.554236		0
412	E2AB19	-1.18404	412	E2AB19	1.6827	412	E2AB19	-0.985862	412	E2AB19	-0.804181		0
413	E2AB23	-0.55786	413	E2AB23	-1.35215	413	E2AB23	-0.875554	413	E2AB23	-1.23278		0
414	E2AB34	-0.0669844	414	E2AB34	1.14134	414	E2AB34	0.77315	414	E2AB34	0.596858		0
416	E2ABA5	-0.124389	416	E2ABA5	-0.138635	416	E2ABA5	-1.06507	416	E2ABA5	0.203379		0
417	E2ABB7	-0.370238	417	E2ABB7	-0.600677	417	E2ABB7	1.15532	417	E2ABB7	1.15194		0
421	E2ABH3	0.612709	421	E2ABH3	0.914379	421	E2ABH3	0.200485	421	E2ABH3	1.27644		0
422	E2ABH4	-0.561133	422	E2ABH4	-1.22922	422	E2ABH4	-0.561958	422	E2ABH4	-0.770772		0
423	E2ABI5	0.0893945	423	E2ABI5	-2.24758	423	E2ABI5	0.896964	423	E2ABI5	0.5865		0
428	E2ABN0	0.10979	428	E2ABN0	1.29645	428	E2ABN0	0.682733	428	E2ABN0	0.359979		0
429	XP_011255071.1 solute carrier organic anion transporter fami	1.07479	429	XP_011255071.1 solute carrier organic anion transporter fami	0.0560375	429	XP_011255071.1 solute carrier organic anion transporter fami	2.02434	429	XP_011255071.1 solute carrier organic anion transporter fami	0.475923		0
432	E2ABQ6	-0.258026	432	E2ABQ6	-0.0485382	432	E2ABQ6	-0.615102	432	E2ABQ6	-2.39626		0
433	E2ABV2	0.239096	433	E2ABV2	-1.88546	433	E2ABV2	0.343714	433	E2ABV2	0.605384		0
435	E2ABW5	0.619044	435	E2ABW5	1.22232	435	E2ABW5	0.971121	435	E2ABW5	0.63089		0
436	E2ABW9	-0.869757	436	E2ABW9	0.994308	436	E2ABW9	-1.62631	436	E2ABW9	-1.44275		0
437	E2ABZ0	0.23767	437	E2ABZ0	1.1508	437	E2ABZ0	0.317924	437	E2ABZ0	0.841156		0
438	E2ABZ6	0.0830065	438	E2ABZ6	1.58884	438	E2ABZ6	-0.00422362	438	E2ABZ6	0.456209		0
443	E2AC27	-1.46708	443	E2AC27	-2.01036	443	E2AC27	-0.700397	443	E2AC27	0.315269		0
444	E2AC60	0.00224229	444	E2AC60	-3.71707	444	E2AC60	-0.539388	444	E2AC60	-0.631688		0
447	E2AC94	3.07712	447	E2AC94	1.7875	447	E2AC94	-1.5415	447	E2AC94	-1.42509		0
449	E2ACC1	1.0895	449	E2ACC1	1.45679	449	E2ACC1	-1.46703	449	E2ACC1	-1.18463		0
453	E2ACH8	0.48094	453	E2ACH8	1.46208	453	E2ACH8	1.19843	453	E2ACH8	-0.222233		0
455	E2ACR2	0.251718	455	E2ACR2	-1.71452	455	E2ACR2	-0.0779203	455	E2ACR2	-1.16768		0
456	E2ACR5	-0.871507	456	E2ACR5	-0.0431733	456	E2ACR5	-1.60575	456	E2ACR5	-0.924818		0
457	E2ACR9	-2.90495	457	E2ACR9	-1.9407	457	E2ACR9	-4.69974	457	E2ACR9	1.39459		0
460	E2ACU8	0.601778	460	E2ACU8	1.24669	460	E2ACU8	1.30994	460	E2ACU8	0.816025		0
464	E2AD19	-0.0955516				464	E2AD19	0.300727	464	E2AD19	0.295556		0
465	XP_011255832.1 aspartate aminotransferase, cytoplasmic isoform X1 [Camponotu	0.23612	465	XP_011255832.1 aspartate aminotransferase, cytoplasmic isoform X1 [Camponotu	-0.191039	465	XP_011255832.1 aspartate aminotransferase, cytoplasmic isoform X1 [Camponotu	0.654529	465	XP_011255832.1 aspartate aminotransferase, cytoplasmic isoform X1 [Camponotu	0.290967		0
467	E2AD64	-0.552453	467	E2AD64	0.0303473	467	E2AD64	-0.0401274	467	E2AD64	-0.048819		0
474	E2ADD9	0.621318	474	E2ADD9	-1.00298	474	E2ADD9	1.28599	474	E2ADD9	0.654748		0
481	E2ADN0	-0.633824	481	E2ADN0	-0.241005	481	E2ADN0	-1.09681	481	E2ADN0	-2.19228		0
487	E2ADT4	0.0056858	487	E2ADT4	0.448051	487	E2ADT4	-0.419669	487	E2ADT4	-0.277552		0
490	E2ADZ5	-0.987657	490	E2ADZ5	-2.56714	490	E2ADZ5	-2.17669	490	E2ADZ5	-1.09933		0
499	E2AE51	-0.436217	499	E2AE51	-1.3894	499	E2AE51	-0.0871628	499	E2AE51	-0.768426		0
500	E2AE72	0.24165	500	E2AE72	1.33861	500	E2AE72	0.695418	500	E2AE72	0.517874		0
506	E2AEA4	0.340208	506	E2AEA4	1.25691	506	E2AEA4	0.634355	506	E2AEA4	-0.0024022		0
509	E2AEC2	0.294054				509	E2AEC2	0.565568	509	E2AEC2	0.740447		0
521	E2AEN9	-1.35011	521	E2AEN9	-0.050647	521	E2AEN9	-1.82951	521	E2AEN9	1.197		0
522	E2AEX0	0.491017	522	E2AEX0	1.54551	522	E2AEX0	0.355495	522	E2AEX0	0.773257		0
523	E2AF09	-0.145296	523	E2AF09	1.16455	523	E2AF09	0.671434	523	E2AF09	0.681893		0
524	E2AF24	-0.689079	524	E2AF24	-0.0482919	524	E2AF24	-0.245923	524	E2AF24	0.961823		0
525	E2AFA5	-0.173566	525	E2AFA5	1.48195	525	E2AFA5	0.311797	525	E2AFA5	-0.190838		0
532	E2AFL0	0.009737	532	E2AFL0	-0.987184	532	E2AFL0	-2.63519	532	E2AFL0	-0.978885		0
536	E2AFM8	0.260833	536	E2AFM8	0.591915	536	E2AFM8	-0.571717	536	E2AFM8	-0.404675		0
537	E2AFQ5	0.0245762	537	E2AFQ5	-0.491638	537	E2AFQ5	-1.04507	537	E2AFQ5	-1.08079		0
543	E2AFY9	0.943221	543	E2AFY9	1.04068	543	E2AFY9	0.718605	543	E2AFY9	0.876644		0
549	E2AGG0	1.29241	549	E2AGG0	0.132138	549	E2AGG0	-1.70696	549	E2AGG0	-0.635987		0
550	E2AGG5	0.947004	550	E2AGG5	-0.974812	550	E2AGG5	0.149557	550	E2AGG5	-0.511776		0
553	E2AGJ7	0.148344	553	E2AGJ7	1.33106	553	E2AGJ7	-0.171954	553	E2AGJ7	0.135505		0
554	E2AGL2	-0.0871245	554	E2AGL2	1.20873	554	E2AGL2	-0.494259	554	E2AGL2	-0.453107		0
555	E2AGM0	0.776196	555	E2AGM0	-0.670216	555	E2AGM0	-0.532284	555	E2AGM0	-1.10082		0
558	E2AGQ0	0.528188	558	E2AGQ0	-2.27992	558	E2AGQ0	-0.225671	558	E2AGQ0	-0.139738		0
559	E2AGQ1	0.436817	559	E2AGQ1	0.438629	559	E2AGQ1	-1.69831	559	E2AGQ1	-0.745722		0
566	E2AHA9	-0.0438322	566	E2AHA9	-1.4754	566	E2AHA9	0.220647	566	E2AHA9	0.559154		0
567	E2AHG9	-0.892795	567	E2AHG9	-0.687517	567	E2AHG9	-0.568939	567	E2AHG9	0.573406		0
573	XP_011258258.1 kynurenine--oxoglutarate transaminase 3 isoform X2	-0.572464	573	XP_011258258.1 kynurenine--oxoglutarate transaminase 3 isoform X2	-0.405008	573	XP_011258258.1 kynurenine--oxoglutarate transaminase 3 isoform X2	-0.489264	573	XP_011258258.1 kynurenine--oxoglutarate transaminase 3 isoform X2	0.959375		0
576	E2AHR4	-0.194432	576	E2AHR4	0.354121	576	E2AHR4	0.389904	576	E2AHR4	-0.147919		0
582	E2AI07	0.139677	582	E2AI07	1.01298	582	E2AI07	1.16115	582	E2AI07	-0.0479807		0
587	E2AIH6	0.871457	587	E2AIH6	0.224637	587	E2AIH6	0.875457	587	E2AIH6	0.777357		0
592	E2AIU9	0.394561	592	E2AIU9	0.858083	592	E2AIU9	0.728336	592	E2AIU9	0.247269		0
597	E2AIX5	-0.700409	597	E2AIX5	-2.43115	597	E2AIX5	-1.02506	597	E2AIX5	-0.389247		0
598	E2AIZ4	-0.0694042	598	E2AIZ4	-0.463433	598	E2AIZ4	-0.0230315	598	E2AIZ4	-0.680863		0
599	E2AIZ6	-0.626222	599	E2AIZ6	-3.25904	599	E2AIZ6	-1.84154	599	E2AIZ6	-1.56943		0
605	E2AJ62	0.219908	605	E2AJ62	1.13899	605	E2AJ62	0.335138	605	E2AJ62	0.618453		0
608	E2AJ75	-0.578883	608	E2AJ75	0.109135	608	E2AJ75	-1.01473	608	E2AJ75	0.167616		0
610	E2AJ86	0.178021	610	E2AJ86	-0.107777	610	E2AJ86	-0.564097	610	E2AJ86	0.376117		0
611	E2AJB5	-0.187119	611	E2AJB5	1.18137	611	E2AJB5	-0.436215	611	E2AJB5	0.148834		0
615	E2AJL8	-1.17025	615	E2AJL8	-2.75936	615	E2AJL8	-0.836278	615	E2AJL8	1.24376		0
619	E2AJP0	0.359518	619	E2AJP0	1.81912	619	E2AJP0	0.164026	619	E2AJP0	-0.458088		0
621	E2AJQ0	0.157874				621	E2AJQ0	0.963671	621	E2AJQ0	1.20738		0
628	E2AJX6	0.0429889	628	E2AJX6	-2.84211	628	E2AJX6	-0.965713	628	E2AJX6	-0.654927		0
629	E2AJX9	-0.222644	629	E2AJX9	0.35017	629	E2AJX9	0.592593	629	E2AJX9	0.753086		0
630	E2AJY8	0.664504	630	E2AJY8	0.377354	630	E2AJY8	1.01848	630	E2AJY8	0.923576		0
631	E2AK02	0.0508444	631	E2AK02	1.70108	631	E2AK02	0.427594	631	E2AK02	0.332717		0
632	E2AK03	1.05833	632	E2AK03	1.0491	632	E2AK03	-2.43747	632	E2AK03	-1.74028		0
633	E2AK04	-0.603441	633	E2AK04	-2.77809	633	E2AK04	-1.31908	633	E2AK04	-0.104746		0
638	E2AK65	-0.438395	638	E2AK65	0.405297	638	E2AK65	-0.032442	638	E2AK65	0.516425		0
641	E2AKD6	-0.702649	641	E2AKD6	-2.82722	641	E2AKD6	-1.59471	641	E2AKD6	-0.891859		0
642	E2AKF6	1.25385	642	E2AKF6	1.43584	642	E2AKF6	2.16463	642	E2AKF6	0.638515		0
643	E2AKG6	0.173844	643	E2AKG6	0.226453	643	E2AKG6	0.713673	643	E2AKG6	-0.160111		0
644	E2AKH8	0.440257	644	E2AKH8	-1.14598	644	E2AKH8	0.68818	644	E2AKH8	0.191275		0
647	E2AKU3	0.117666	647	E2AKU3	0.711204	647	E2AKU3	0.338884	647	E2AKU3	-0.436934		0
648	E2AKV6	0.227464	648	E2AKV6	0.980155	648	E2AKV6	-0.832488	648	E2AKV6	-1.86044		0
650	E2AL14	1.00621	650	E2AL14	0.053682	650	E2AL14	-0.653834	650	E2AL14	-1.12548		0
660	E2ALK0	0.428886	660	E2ALK0	0.337927	660	E2ALK0	1.20796	660	E2ALK0	-0.00942263		0
662	E2ALL5	0.0557418	662	E2ALL5	0.695065	662	E2ALL5	0.286934	662	E2ALL5	0.594288		0
666	E2ALP2	-0.669366	666	E2ALP2	-2.02449	666	E2ALP2	-1.46759	666	E2ALP2	-0.129019		0
667	E2ALS8	-0.716216	667	E2ALS8	-3.16582	667	E2ALS8	-2.04008	667	E2ALS8	-1.56597		0
668	E2ALT1	0.196857	668	E2ALT1	1.40682	668	E2ALT1	1.29122	668	E2ALT1	-0.437471		0
670	E2ALU3	0.440733	670	E2ALU3	0.775698	670	E2ALU3	0.141517	670	E2ALU3	0.17824		0
678	E2AMD6	-0.123219	678	E2AMD6	-1.8299	678	E2AMD6	-1.3713	678	E2AMD6	0.26395		0
679	E2AME3	0.490491	679	E2AME3	0.322581	679	E2AME3	0.0450843	679	E2AME3	-0.169601		0
680	E2AMG4	-0.812217	680	E2AMG4	-2.06204	680	E2AMG4	-1.74609	680	E2AMG4	0.245204		0
682	E2AMH2	-0.493216	682	E2AMH2	-0.144171	682	E2AMH2	-0.372611	682	E2AMH2	-0.0335231		0
683	E2AMK0	0.696795	683	E2AMK0	0.938401	683	E2AMK0	1.19423	683	E2AMK0	0.435491		0
684	E2AMK3	0.0408769	684	E2AMK3	0.529359	684	E2AMK3	0.109151	684	E2AMK3	0.08339		0
685	E2AMK4	-0.989082	685	E2AMK4	0.778909	685	E2AMK4	-0.602555	685	E2AMK4	0.658737		0
687	E2AMQ8	-0.292715	687	E2AMQ8	-2.04157	687	E2AMQ8	1.2602	687	E2AMQ8	0.859383		0
688	E2AMU0	-0.0755908	688	E2AMU0	0.493277	688	E2AMU0	0.613113	688	E2AMU0	0.41709		0
689	E2AMU9	0.00160313	689	E2AMU9	-0.704686	689	E2AMU9	-0.0292671	689	E2AMU9	-0.424713		0
690	E2AMV4	-0.500185	690	E2AMV4	0.23465	690	E2AMV4	0.189225	690	E2AMV4	-1.52757		0
691	E2AMW3	1.10836	691	E2AMW3	-0.672698	691	E2AMW3	-1.08326	691	E2AMW3	-0.0747597		0
698	E2ANA8	0.187339	698	E2ANA8	0.848893	698	E2ANA8	-0.689388	698	E2ANA8	0.037304		0
699	XP_025264079.1 alpha,alpha-trehalose-phosphate	-0.18108	699	XP_025264079.1 alpha,alpha-trehalose-phosphate	0.160302	699	XP_025264079.1 alpha,alpha-trehalose-phosphate	-0.560456	699	XP_025264079.1 alpha,alpha-trehalose-phosphate	-0.0117418		0
700	E2ANE4	-0.225463	700	E2ANE4	-0.130041	700	E2ANE4	0.715597	700	E2ANE4	0.882832		0
703	E2ANT2	-0.248531	703	E2ANT2	1.11475	703	E2ANT2	-1.0178	703	E2ANT2	0.407541		0
707	E2AP46	0.10573	707	E2AP46	-0.65564	707	E2AP46	0.214816	707	E2AP46	0.593498		0
708	E2AP51	-0.460293	708	E2AP51	0.0445629	708	E2AP51	-0.0602446	708	E2AP51	0.300854		0
710	E2AP90	0.294939	710	E2AP90	-1.41592	710	E2AP90	0.236153	710	E2AP90	-0.56205		0
712	XP_011261602.1 V-type proton ATPase 116 kDa subunit a isoform X3 [Camponotus f	0.173901	712	XP_011261602.1 V-type proton ATPase 116 kDa subunit a isoform X3 [Camponotus f	0.774518	712	XP_011261602.1 V-type proton ATPase 116 kDa subunit a isoform X3 [Camponotus f	0.133105	712	XP_011261602.1 V-type proton ATPase 116 kDa subunit a isoform X3 [Camponotus f	-0.0861505		0
713	E2AP99	0.517501	713	E2AP99	0.515713	713	E2AP99	0.64794	713	E2AP99	0.932988		0
714	E2APC4	-0.547109	714	E2APC4	-1.62023	714	E2APC4	-1.6264	714	E2APC4	1.24082		0
724	E2APS1	0.0172221	724	E2APS1	0.00552101	724	E2APS1	0.00105294	724	E2APS1	0.122869		0
729	E2APZ5	-0.875266	729	E2APZ5	0.351628	729	E2APZ5	0.0833098	729	E2APZ5	0.31554		0
730	E2APZ9	-0.147982	730	E2APZ9	-1.10841	730	E2APZ9	-0.762609	730	E2APZ9	0.154959		0
732	E2AQ44	0.611597	732	E2AQ44	0.677958	732	E2AQ44	0.936416	732	E2AQ44	-0.00681525		0
735	E2AQ84	0.644916	735	E2AQ84	1.03915				735	E2AQ84	0.0313156		0
737	E2AQI6	-0.731317	737	E2AQI6	-1.7617	737	E2AQI6	-0.0241772	737	E2AQI6	-0.55387		0
739	E2AQK2	-0.439782	739	E2AQK2	-0.151953	739	E2AQK2	-0.116755	739	E2AQK2	0.738548		0
742	E2AQV0	-0.939525	742	E2AQV0	-0.113967	742	E2AQV0	-0.424313	742	E2AQV0	-0.0260199		0
743	E2AQX7	0.815154	743	E2AQX7	2.02352	743	E2AQX7	-0.0689022	743	E2AQX7	-1.56699		0
744	E2AQY5	-0.0893637	744	E2AQY5	1.14009	744	E2AQY5	0.2265	744	E2AQY5	0.892689		0
752	E2ARB2	-1.32662	752	E2ARB2	0.389054	752	E2ARB2	1.0134	752	E2ARB2	0.986484		0
754	E2ARD3	-0.0033656	754	E2ARD3	1.13008	754	E2ARD3	0.0144982	754	E2ARD3	0.198191		0
758	E2ARG4	0.154171	758	E2ARG4	-1.68594	758	E2ARG4	-2.62311	758	E2ARG4	-1.21869		0
761	E2ARH9	-0.0141635	761	E2ARH9	-1.8267	761	E2ARH9	1.99978	761	E2ARH9	1.33733		0
763	E2ARJ0	-2.2394	763	E2ARJ0	0.543016	763	E2ARJ0	-1.26274	763	E2ARJ0	-0.0328649		0
768	E2ART6	-0.0571377	768	E2ART6	1.25501	768	E2ART6	1.2642	768	E2ART6	-0.169469		0
770	E2ARU3	0.0449901	770	E2ARU3	-0.860395	770	E2ARU3	-1.50836	770	E2ARU3	-0.618897		0
773	E2ARX6	-0.960462	773	E2ARX6	-2.27003	773	E2ARX6	-1.57373	773	E2ARX6	-0.685422		0
774	E2AS00	0.297115	774	E2AS00	0.322461	774	E2AS00	-0.215891	774	E2AS00	0.0336152		0
784	E2ASG6	-0.490806	784	E2ASG6	0.356317	784	E2ASG6	0.404447	784	E2ASG6	0.0819669		0
789	E2ASN8	-0.0779705				789	E2ASN8	0.349446	789	E2ASN8	0.611906		0
790	E2ASQ5	1.44827	790	E2ASQ5	-0.668902	790	E2ASQ5	-2.32066	790	E2ASQ5	-0.378528		0
792	E2ASR9	-0.551188	792	E2ASR9	0.694543	792	E2ASR9	0.226244	792	E2ASR9	0.160029		0
793	E2ASS7	0.139221	793	E2ASS7	0.21915	793	E2ASS7	-0.0146243	793	E2ASS7	0.861275		0
801	XP_011263602.1 cystathionine beta-synthase [Camponotus	-0.228416	801	XP_011263602.1 cystathionine beta-synthase [Camponotus	2.17326	801	XP_011263602.1 cystathionine beta-synthase [Camponotus	0.367073	801	XP_011263602.1 cystathionine beta-synthase [Camponotus	0.139019		0
812	E2ATZ6	-0.420854	812	E2ATZ6	0.434349	812	E2ATZ6	0.464764	812	E2ATZ6	0.745755		0
814	E2AU22	-0.0668709	814	E2AU22	-0.17183	814	E2AU22	-2.77243	814	E2AU22	-0.879924		0
819	E2AUD9	0.0999342	819	E2AUD9	0.383583	819	E2AUD9	0.887983	819	E2AUD9	0.758728		0
824	E2AUK6	-0.480538	824	E2AUK6	-1.46272	824	E2AUK6	-0.630745	824	E2AUK6	-0.402587		0
825	E2AUL5	0.214672	825	E2AUL5	-0.17254	825	E2AUL5	0.0835163	825	E2AUL5	0.563746		0
833	E2AV36	0.591351	833	E2AV36	1.62077	833	E2AV36	0.502605	833	E2AV36	0.13385		0
835	E2AV98	0.696007				835	E2AV98	1.10228	835	E2AV98	0.58		0
836	E2AV99	-0.0971889	836	E2AV99	0.724386	836	E2AV99	-1.06879	836	E2AV99	-0.905062		0
839	E2AVH4	0.121126	839	E2AVH4	-0.650387	839	E2AVH4	-0.821501	839	E2AVH4	-0.968965		0
841	E2AVK0	0.970443	841	E2AVK0	0.640951	841	E2AVK0	0.335602	841	E2AVK0	-0.172804		0
847	E2AVV1	-0.580703	847	E2AVV1	-3.57453	847	E2AVV1	-0.634238	847	E2AVV1	-0.813354		0
849	E2AVX1	0.319819	849	E2AVX1	1.14625	849	E2AVX1	-0.113798	849	E2AVX1	-0.587923		0
850	E2AVX9	-0.380026	850	E2AVX9	-1.81243	850	E2AVX9	-0.259862	850	E2AVX9	-0.602367		0
852	E2AVY8	0.227943	852	E2AVY8	1.31047	852	E2AVY8	1.76255	852	E2AVY8	0.811851		0
853	E2AVZ2	-0.113208	853	E2AVZ2	0.875267	853	E2AVZ2	0.166242	853	E2AVZ2	0.0542336		0
854	E2AW15	0.181682				854	E2AW15	0.463995	854	E2AW15	0.156736		0
858	XP_011265197.1 multidrug resistance protein homolog 49 isoform X2 [Camponotu	0.37384	858	XP_011265197.1 multidrug resistance protein homolog 49 isoform X2 [Camponotu	0.775642	858	XP_011265197.1 multidrug resistance protein homolog 49 isoform X2 [Camponotu	-0.467861	858	XP_011265197.1 multidrug resistance protein homolog 49 isoform X2 [Camponotu	0.420125		0
859	E2AWC1	0.78247	859	E2AWC1	-0.840611	859	E2AWC1	0.0594841	859	E2AWC1	-0.266056		0
860	E2AWG1	1.57305	860	E2AWG1	0.0955754	860	E2AWG1	1.5411	860	E2AWG1	0.0873369		0
862	E2AWK6	0.989424	862	E2AWK6	-1.27236	862	E2AWK6	-1.58309	862	E2AWK6	-0.978363		0
864	E2AWL4	0.17633	864	E2AWL4	0.909029	864	E2AWL4	0.22924	864	E2AWL4	0.432846		0
865	E2AWL6	0.85125	865	E2AWL6	0.762158	865	E2AWL6	-0.273015	865	E2AWL6	-0.313412		0
873	E2AX13	-0.879126	873	E2AX13	0.827717	873	E2AX13	0.208246	873	E2AX13	0.29231		0
874	E2AX18	1.41181	874	E2AX18	0.21275	874	E2AX18	3.66261	874	E2AX18	0.653012		0
875	E2AX30	0.791566	875	E2AX30	0.564657	875	E2AX30	0.705314	875	E2AX30	0.171703		0
878	E2AX72	0.73848				878	E2AX72	0.38624	878	E2AX72	0.481465		0
879	E2AX77	-0.15168	879	E2AX77	-0.0333819	879	E2AX77	-1.05474	879	E2AX77	-0.693564		0
881	E2AXK1	0.0154191	881	E2AXK1	0.367887	881	E2AXK1	0.415082	881	E2AXK1	0.228251		0
882	E2AXL2	0.253533	882	E2AXL2	0.553998	882	E2AXL2	0.466964	882	E2AXL2	0.512703		0
883	E2AXM8	1.14616	883	E2AXM8	0.0800052	883	E2AXM8	1.35142	883	E2AXM8	-0.229196		0
884	E2AXN0	-0.533349	884	E2AXN0	1.18696	884	E2AXN0	-0.468271	884	E2AXN0	1.53007		0
888	XP_011265918.1 trans-1,2-dihydrobenzene-1,2-diol dehydrogena	-0.283351	888	XP_011265918.1 trans-1,2-dihydrobenzene-1,2-diol dehydrogena	-0.134453	888	XP_011265918.1 trans-1,2-dihydrobenzene-1,2-diol dehydrogena	0.393288	888	XP_011265918.1 trans-1,2-dihydrobenzene-1,2-diol dehydrogena	0.0997131		0
889	E2AXR8	-1.56711	889	E2AXR8	-1.98572	889	E2AXR8	-0.16227	889	E2AXR8	-0.388148		0
892	E2AY00	-1.06691	892	E2AY00	-1.88452	892	E2AY00	-1.09974	892	E2AY00	0.130155		0
895	E2AY06	0.11349	895	E2AY06	-2.65394	895	E2AY06	-2.93092	895	E2AY06	-0.678768		0
896	E2AY08	-0.561628				896	E2AY08	0.122793	896	E2AY08	0.326606		0
897	E2AY85	0.380748	897	E2AY85	-1.21756	897	E2AY85	0.417386	897	E2AY85	0.0189919		0
900	E2AYF4	0.633322	900	E2AYF4	-1.41855	900	E2AYF4	0.937162	900	E2AYF4	-0.184243		0
903	E2AYI3	-0.487287	903	E2AYI3	-0.140369	903	E2AYI3	1.17755	903	E2AYI3	0.551496		0
904	E2AYI4	0.53054	904	E2AYI4	0.358448	904	E2AYI4	0.949886	904	E2AYI4	-0.335537		0
907	E2AYP1	-1.08969	907	E2AYP1	0.333522	907	E2AYP1	1.04419	907	E2AYP1	1.40742		0
910	XP_011266361.1 CKLF-like MARVEL transmembrane domain-contain	0.124854	910	XP_011266361.1 CKLF-like MARVEL transmembrane domain-contain	-0.149684	910	XP_011266361.1 CKLF-like MARVEL transmembrane domain-contain	1.77037	910	XP_011266361.1 CKLF-like MARVEL transmembrane domain-contain	0.940435		0
913	E2AYS3	0.506641	913	E2AYS3	-0.633763	913	E2AYS3	0.127053	913	E2AYS3	0.854718		0
915	E2AYU1	-0.16307	915	E2AYU1	0.517138	915	E2AYU1	1.35453	915	E2AYU1	0.238753		0
917	E2AZ08	-0.417802	917	E2AZ08	0.521675	917	E2AZ08	-1.0491	917	E2AZ08	-1.31475		0
919	XP_011266577.1 leucine-rich repeat-c	-0.133581	919	XP_011266577.1 leucine-rich repeat-c	1.02626	919	XP_011266577.1 leucine-rich repeat-c	0.799902	919	XP_011266577.1 leucine-rich repeat-c	0.385215		0
923	E2AZ59	0.518144	923	E2AZ59	-0.909693	923	E2AZ59	0.0360025	923	E2AZ59	0.568364		0
925	E2AZ96	-0.209208	925	E2AZ96	-1.22087	925	E2AZ96	0.119168	925	E2AZ96	-0.264668		0
931	E2AZK6	1.52346	931	E2AZK6	-1.72286	931	E2AZK6	1.45622	931	E2AZK6	0.353362		0
935	E2AZT4	-0.417175	935	E2AZT4	-1.61792	935	E2AZT4	-1.20707	935	E2AZT4	0.150713		0
936	E2AZT6	0.135814	936	E2AZT6	0.154248	936	E2AZT6	0.0962886	936	E2AZT6	0.501407		0
938	E2AZU1	-1.15609	938	E2AZU1	-0.63987	938	E2AZU1	0.112535	938	E2AZU1	-0.460734		0
939	E2AZV5	0.166927	939	E2AZV5	0.89033	939	E2AZV5	0.00506462	939	E2AZV5	-0.0126864		0
943	E2B0D3	-1.04459	943	E2B0D3	-3.05498	943	E2B0D3	-1.52585	943	E2B0D3	-0.416487		0
950	E2B123	-0.406801	950	E2B123	-2.75897	950	E2B123	0.351018	950	E2B123	-0.668832		0
951	E2B155	0.363132	951	E2B155	-0.65026	951	E2B155	0.173125	951	E2B155	-0.353211		0
954	E2B171	-0.0131076	954	E2B171	1.17388	954	E2B171	0.40421	954	E2B171	1.64377		0
955	E2B178	-0.0950591	955	E2B178	0.564044	955	E2B178	-0.0343139	955	E2B178	-0.0386528		0
958	E2B1B7	-0.615626	958	E2B1B7	-0.713946	958	E2B1B7	-0.537233	958	E2B1B7	0.0247512		0
959	E2B1C8	0.222474	959	E2B1C8	-1.80923	959	E2B1C8	-0.115608	959	E2B1C8	0.308083		0
961	E2B1G2	-0.283153	961	E2B1G2	1.08616	961	E2B1G2	-0.638545	961	E2B1G2	0.772645		0
972	E2B222	0.218034							972	E2B222	0.567365		0
973	E2B223	-0.760121	973	E2B223	-0.428132	973	E2B223	-1.09058	973	E2B223	-1.124		0
974	E2B227	-0.170658	974	E2B227	-4.52064	974	E2B227	-0.133146	974	E2B227	-0.577948		0
979	E2B271	1.15225	979	E2B271	-2.11789	979	E2B271	0.944604	979	E2B271	-1.39467		0
1010	E2A3G1	-0.579767	1010	E2A3G1	-0.073948	1010	E2A3G1	0.0166331	1010	E2A3G1	-0.388267		0
1011	XP_011250886.1 uncharacterized protein LOC105248039 [Camponotus floridanus]	-0.406944	1011	XP_011250886.1 uncharacterized protein LOC105248039 [Camponotus floridanus]	-1.52119	1011	XP_011250886.1 uncharacterized protein LOC105248039 [Camponotus floridanus]	0.202651	1011	XP_011250886.1 uncharacterized protein LOC105248039 [Camponotus floridanus]	0.175413		0
1012	E2A3R3	0.0180791	1012	E2A3R3	-0.196684	1012	E2A3R3	-0.0911039	1012	E2A3R3	0.77968		0
1013	XP_011251038.1 N(4)-(Beta-N-acetylglucosaminyl)-L-asparaginase-like [Cam	-0.0068508	1013	XP_011251038.1 N(4)-(Beta-N-acetylglucosaminyl)-L-asparaginase-like [Cam	0.134247	1013	XP_011251038.1 N(4)-(Beta-N-acetylglucosaminyl)-L-asparaginase-like [Cam	0.129027	1013	XP_011251038.1 N(4)-(Beta-N-acetylglucosaminyl)-L-asparaginase-like [Cam	-0.00548561		0
1014	E2A3W4	0.449416	1014	E2A3W4	-2.39908	1014	E2A3W4	-0.12742	1014	E2A3W4	-0.886789		0
1021	E2A4T7	-0.929176	1021	E2A4T7	-1.86605	1021	E2A4T7	-1.4337	1021	E2A4T7	-0.214367		0
1027	E2A6B9	-0.0289325	1027	E2A6B9	-0.650793	1027	E2A6B9	-0.467859	1027	E2A6B9	0.53273		0
1028	E2A6E2	-0.954295	1028	E2A6E2	-2.23944	1028	E2A6E2	1.74212	1028	E2A6E2	-2.30599		0
1030	XP_011252500.2 protein CREG1 [Camponotus floridanus]	0.443652	1030	XP_011252500.2 protein CREG1 [Camponotus floridanus]	-0.658834	1030	XP_011252500.2 protein CREG1 [Camponotus floridanus]	0.114083	1030	XP_011252500.2 protein CREG1 [Camponotus floridanus]	0.782341		0
1031	E2A7K7	2.07296	1031	E2A7K7	-0.289128	1031	E2A7K7	-2.31222	1031	E2A7K7	-1.18392		0
1033	E2A7S3	-0.367227	1033	E2A7S3	1.55157	1033	E2A7S3	1.09197	1033	E2A7S3	-0.119144		0
1038	XP_011253403.1 glycogen [	0.64356	1038	XP_011253403.1 glycogen [	1.27281	1038	XP_011253403.1 glycogen [	-0.113766	1038	XP_011253403.1 glycogen [	0.691549		0
1039	E2A8P0	-0.755531	1039	E2A8P0	0.606285	1039	E2A8P0	0.607054	1039	E2A8P0	0.786699		0
1041	E2A938	0.22586	1041	E2A938	0.00826942	1041	E2A938	0.222736	1041	E2A938	0.287029		0
1042	XP_011253798.1 neural/ectodermal development factor IMP-L2 isoform X	0.774839	1042	XP_011253798.1 neural/ectodermal development factor IMP-L2 isoform X	1.00994	1042	XP_011253798.1 neural/ectodermal development factor IMP-L2 isoform X	-0.12367	1042	XP_011253798.1 neural/ectodermal development factor IMP-L2 isoform X	0.176703		0
1045	E2A9W2	-1.63882	1045	E2A9W2	-0.453457	1045	E2A9W2	-4.27754	1045	E2A9W2	1.32432		0
1046	E2AA04	0.748979	1046	E2AA04	1.6568	1046	E2AA04	-0.279515	1046	E2AA04	-1.40286		0
1047	XP_011254732.1 hexokinase type 2 isoform X1 [Camponotus floridanus]	-0.320943	1047	XP_011254732.1 hexokinase type 2 isoform X1 [Camponotus floridanus]	0.782801	1047	XP_011254732.1 hexokinase type 2 isoform X1 [Camponotus floridanus]	-0.468263	1047	XP_011254732.1 hexokinase type 2 isoform X1 [Camponotus floridanus]	0.319898		0
1049	E2ABZ4	-0.505404	1049	E2ABZ4	0.409194	1049	E2ABZ4	0.70255	1049	E2ABZ4	0.491451		0
1051	E2AC28	-4.82406	1051	E2AC28	5.36448	1051	E2AC28	-0.0593738	1051	E2AC28	0.599104		0
1052	E2AC71	-0.120813	1052	E2AC71	1.10434	1052	E2AC71	0.0954632	1052	E2AC71	-1.29911		0
1054	XP_011255562.2 peritrophin-48 [Camponotus floridanus]	0.368321	1054	XP_011255562.2 peritrophin-48 [Camponotus floridanus]	0.0630337	1054	XP_011255562.2 peritrophin-48 [Camponotus floridanus]	0.0846564	1054	XP_011255562.2 peritrophin-48 [Camponotus floridanus]	-0.0283496		0
1058	E1ZWM5	0.147464	1058	E1ZWM5	0.537978	1058	E1ZWM5	0.960127	1058	E1ZWM5	-0.873198		0
1059	E2ADE0	0.268302	1059	E2ADE0	0.654066	1059	E2ADE0	0.625349	1059	E2ADE0	-0.68213		0
1060	E2ADW9	0.0539017	1060	E2ADW9	-0.732564	1060	E2ADW9	-0.503757	1060	E2ADW9	-0.0451212		0
1062	E2ADY7	0.57116	1062	E2ADY7	-2.02128	1062	E2ADY7	-0.0197232	1062	E2ADY7	0.550256		0
1063	E2AE31	-0.402263	1063	E2AE31	1.64455	1063	E2AE31	1.10274	1063	E2AE31	0.369047		0
1064	E2AE47	-0.554697	1064	E2AE47	1.83038	1064	E2AE47	0.351148	1064	E2AE47	0.387545		0
1069	E1ZWT9	0.275971	1069	E1ZWT9	1.27018	1069	E1ZWT9	0.456688	1069	E1ZWT9	-0.028875		0
1072	XP_011257736.2 leucine-rich repeat-containing G-protein coupled receptor 5-like [Camponotus floridanus]	-0.877065	1072	XP_011257736.2 leucine-rich repeat-containing G-protein coupled receptor 5-like [Camponotus floridanus]	-0.0629688	1072	XP_011257736.2 leucine-rich repeat-containing G-protein coupled receptor 5-like [Camponotus floridanus]	-2.09507	1072	XP_011257736.2 leucine-rich repeat-containing G-protein coupled receptor 5-like [Camponotus floridanus]	-0.583933		0
1074	XP_011257800.2 regucalcin isoform X1 [Camponotus floridanus]	-0.0431569	1074	XP_011257800.2 regucalcin isoform X1 [Camponotus floridanus]	-0.46012	1074	XP_011257800.2 regucalcin isoform X1 [Camponotus floridanus]	-0.063274	1074	XP_011257800.2 regucalcin isoform X1 [Camponotus floridanus]	0.884758		0
1075	E2AH16	0.336958	1075	E2AH16	1.95676	1075	E2AH16	0.893761	1075	E2AH16	-0.651312		0
1076	XP_011257946.1 uncharacterized protein LOC105252319 isoform X2 [Camponotus florida	-1.40565	1076	XP_011257946.1 uncharacterized protein LOC105252319 isoform X2 [Camponotus florida	1.10959	1076	XP_011257946.1 uncharacterized protein LOC105252319 isoform X2 [Camponotus florida	-2.50621	1076	XP_011257946.1 uncharacterized protein LOC105252319 isoform X2 [Camponotus florida	0.85198		0
1077	E2AHG1	-0.342487	1077	E2AHG1	0.200727	1077	E2AHG1	-0.712619	1077	E2AHG1	0.48574		0
1078	E2AIC5	1.178	1078	E2AIC5	-0.399527	1078	E2AIC5	-1.83975	1078	E2AIC5	-1.03648		0
1084	E2AJM0	0.0265658	1084	E2AJM0	-2.20674	1084	E2AJM0	0.349803	1084	E2AJM0	-0.170216		0
1085	XP_011259279.2 venom carboxylesterase-6 [Camponotus floridanus]	-1.85376	1085	XP_011259279.2 venom carboxylesterase-6 [Camponotus floridanus]	-1.4061	1085	XP_011259279.2 venom carboxylesterase-6 [Camponotus floridanus]	-1.26585	1085	XP_011259279.2 venom carboxylesterase-6 [Camponotus floridanus]	0.428195		0
1086	XP_011259281.2 uncharacterized protein LOC105253145 [Camponotus floridanus]	-0.18246	1086	XP_011259281.2 uncharacterized protein LOC105253145 [Camponotus floridanus]	-1.93088	1086	XP_011259281.2 uncharacterized protein LOC105253145 [Camponotus floridanus]	-0.566905	1086	XP_011259281.2 uncharacterized protein LOC105253145 [Camponotus floridanus]	0.970074		0
1087	E2AJT8	-0.214616	1087	E2AJT8	0.337043	1087	E2AJT8	-1.06318	1087	E2AJT8	-1.82106		0
1088	E2AKQ7	0.975818	1088	E2AKQ7	0.643292	1088	E2AKQ7	0.695504	1088	E2AKQ7	0.84213		0
1089	E2ALF0	0.380769	1089	E2ALF0	-0.12558	1089	E2ALF0	0.727013	1089	E2ALF0	-0.391359		0
1090	XP_011260493.3 aminopeptidase N-like [Camponotus floridanus]	0.180341	1090	XP_011260493.3 aminopeptidase N-like [Camponotus floridanus]	-0.567867	1090	XP_011260493.3 aminopeptidase N-like [Camponotus floridanus]	-0.468447	1090	XP_011260493.3 aminopeptidase N-like [Camponotus floridanus]	0.493151		0
1091	E2ALY1	0.910558	1091	E2ALY1	1.184	1091	E2ALY1	0.662001	1091	E2ALY1	-0.793536		0
1092	E2AM68	0.665329	1092	E2AM68	0.355137	1092	E2AM68	0.106894	1092	E2AM68	0.000933908		0
1093	E1ZXK2	-0.084216	1093	E1ZXK2	-1.25895	1093	E1ZXK2	0.63058	1093	E1ZXK2	-0.0310175		0
1095	XP_011261308.1 calci	1.00016	1095	XP_011261308.1 calci	-1.54492	1095	XP_011261308.1 calci	-1.46296	1095	XP_011261308.1 calci	-0.593923		0
1097	E1ZXN9	-0.0212893	1097	E1ZXN9	1.82131	1097	E1ZXN9	0.256627	1097	E1ZXN9	0.232588		0
1098	E2AP55	-0.337747	1098	E2AP55	-0.633267	1098	E2AP55	-0.444139	1098	E2AP55	0.14716		0
1099	E2APK9	0.606183	1099	E2APK9	0.523196	1099	E2APK9	1.01729	1099	E2APK9	-0.171282		0
1100	XP_011261898.2 alpha-glucosidase [Camponotus floridanus]	-0.586934	1100	XP_011261898.2 alpha-glucosidase [Camponotus floridanus]	-1.37292	1100	XP_011261898.2 alpha-glucosidase [Camponotus floridanus]	-1.07734	1100	XP_011261898.2 alpha-glucosidase [Camponotus floridanus]	-1.6268		0
1105	E2ARI6	0.575145	1105	E2ARI6	0.458197	1105	E2ARI6	-0.778088	1105	E2ARI6	-0.415794		0
1109	XP_011263078.2 alpha-amylase 1 isoform X1 [Camponotus floridanus]	-2.26358	1109	XP_011263078.2 alpha-amylase 1 isoform X1 [Camponotus floridanus]	0.830179	1109	XP_011263078.2 alpha-amylase 1 isoform X1 [Camponotus floridanus]	-0.00171551	1109	XP_011263078.2 alpha-amylase 1 isoform X1 [Camponotus floridanus]	0.767367		0
1113	XP_011263221.1 uncharacterized protein LOC105255577 [Camponotus floridanus]	0.400769	1113	XP_011263221.1 uncharacterized protein LOC105255577 [Camponotus floridanus]	1.13602	1113	XP_011263221.1 uncharacterized protein LOC105255577 [Camponotus floridanus]	0.697771	1113	XP_011263221.1 uncharacterized protein LOC105255577 [Camponotus floridanus]	0.368029		0
1115	E2ASS1	-0.16624	1115	E2ASS1	0.569878	1115	E2ASS1	-0.835053	1115	E2ASS1	-0.592836		0
1117	E2ATD7	0.696563	1117	E2ATD7	-0.564104	1117	E2ATD7	1.03104	1117	E2ATD7	-0.477002		0
1120	E2ATY3	1.09282	1120	E2ATY3	-3.6667	1120	E2ATY3	0.41879	1120	E2ATY3	-0.817301		0
1121	E2AU75	0.703965	1121	E2AU75	-0.709643	1121	E2AU75	-0.0332229	1121	E2AU75	-1.35752		0
1123	E2AUA4	0.734313	1123	E2AUA4	1.34265	1123	E2AUA4	0.507844	1123	E2AUA4	0.397686		0
1124	XP_011264250.1 vesicle-associated membrane protein 2 isoform X2 [Camponotus flor	0.312344	1124	XP_011264250.1 vesicle-associated membrane protein 2 isoform X2 [Camponotus flor	0.121354	1124	XP_011264250.1 vesicle-associated membrane protein 2 isoform X2 [Camponotus flor	0.890176	1124	XP_011264250.1 vesicle-associated membrane protein 2 isoform X2 [Camponotus flor	0.249616		0
1125	XP_011264385.1 multidrug resistance-associated protein 1 isoform X3 [Camponotus floridanus]	0.580024	1125	XP_011264385.1 multidrug resistance-associated protein 1 isoform X3 [Camponotus floridanus]	1.107	1125	XP_011264385.1 multidrug resistance-associated protein 1 isoform X3 [Camponotus floridanus]	-0.802464	1125	XP_011264385.1 multidrug resistance-associated protein 1 isoform X3 [Camponotus floridanus]	-0.895024		0
1127	XP_011264422.1 annexin B9-like isoform X1 [Camponotus floridanus]	0.404973	1127	XP_011264422.1 annexin B9-like isoform X1 [Camponotus floridanus]	-0.311336	1127	XP_011264422.1 annexin B9-like isoform X1 [Camponotus floridanus]	-1.18583	1127	XP_011264422.1 annexin B9-like isoform X1 [Camponotus floridanus]	-1.93064		0
1128	E2AVB1	-0.497656	1128	E2AVB1	-0.246771	1128	E2AVB1	-0.00857587	1128	E2AVB1	0.409591		0
1129	E2AVF4	-0.441646	1129	E2AVF4	1.26899	1129	E2AVF4	-0.326551	1129	E2AVF4	-0.00148379		0
1130	XP_011264740.1 transferrin [Camponotus floridanus]	1.52865	1130	XP_011264740.1 transferrin [Camponotus floridanus]	0.538403	1130	XP_011264740.1 transferrin [Camponotus floridanus]	-1.53897	1130	XP_011264740.1 transferrin [Camponotus floridanus]	-1.40991		0
1131	XP_011264789.1 sodium/	1.13896	1131	XP_011264789.1 sodium/	0.932281	1131	XP_011264789.1 sodium/	0.715303	1131	XP_011264789.1 sodium/	1.43923		0
1132	E2AVY1	-0.0955307	1132	E2AVY1	1.07063	1132	E2AVY1	-0.719389	1132	E2AVY1	0.110554		0
1134	E1ZV36	0.191166	1134	E1ZV36	-3.65333	1134	E1ZV36	1.24264	1134	E1ZV36	-1.00269		0
1136	E2AW51	0.105647	1136	E2AW51	1.15683	1136	E2AW51	0.343777	1136	E2AW51	0.423473		0
1139	E2AWT0	-0.0861681	1139	E2AWT0	1.07478	1139	E2AWT0	0.633478	1139	E2AWT0	0.225412		0
1140	E2AX17	0.220137				1140	E2AX17	0.0583659	1140	E2AX17	0.956171		0
1141	E2AX16	-0.0453088	1141	E2AX16	-1.48908	1141	E2AX16	-0.237387	1141	E2AX16	-0.686428		0
1142	XP_011265783	0.0390803	1142	XP_011265783	-1.14843	1142	XP_011265783	2.65623	1142	XP_011265783	0.178123		0
			1143	E2AXV8	0.21565	1143	E2AXV8	1.0965					0
1144	XP_011266004.2 venom serine carboxypeptidase-like [Camponotus floridanus]	-1.79013	1144	XP_011266004.2 venom serine carboxypeptidase-like [Camponotus floridanus]	-3.89696	1144	XP_011266004.2 venom serine carboxypeptidase-like [Camponotus floridanus]	-0.812908	1144	XP_011266004.2 venom serine carboxypeptidase-like [Camponotus floridanus]	0.858296		0
1145	E2AY02	-1.04326	1145	E2AY02	-3.21673	1145	E2AY02	-1.25812	1145	E2AY02	0.0729902		0
1146	E2AY28	-0.315251	1146	E2AY28	0.20021	1146	E2AY28	0.389767	1146	E2AY28	0.653344		0
1148	E2AYB4	0.0764077	1148	E2AYB4	0.0413957	1148	E2AYB4	0.380875	1148	E2AYB4	-0.70128		0
1149	E2AYC1	-1.2014	1149	E2AYC1	0.727329	1149	E2AYC1	-1.04838	1149	E2AYC1	-0.293717		0
1151	XP_011266509.1 chymotrypsin inhibitor-like [Camponotus floridanus]	0.0463939	1151	XP_011266509.1 chymotrypsin inhibitor-like [Camponotus floridanus]	1.69256	1151	XP_011266509.1 chymotrypsin inhibitor-like [Camponotus floridanus]	0.128355	1151	XP_011266509.1 chymotrypsin inhibitor-like [Camponotus floridanus]	-0.529286		0
1152	E2AZ60	0.0306809	1152	E2AZ60	0.911098	1152	E2AZ60	-1.26814	1152	E2AZ60	1.03561		0
1153	E2AZU0	-0.825986	1153	E2AZU0	-0.210228	1153	E2AZU0	-1.54732	1153	E2AZU0	-1.34924		0
1154	XP_011267011.2 venom acid phosphatase Acph-1 [Camponotus floridanus]	0.262718	1154	XP_011267011.2 venom acid phosphatase Acph-1 [Camponotus floridanus]	0.581091	1154	XP_011267011.2 venom acid phosphatase Acph-1 [Camponotus floridanus]	-0.0227514	1154	XP_011267011.2 venom acid phosphatase Acph-1 [Camponotus floridanus]	0.422356		0
1155	XP_011267102.2 glucosylceramidase isoform X2 [Cam	-0.355703	1155	XP_011267102.2 glucosylceramidase isoform X2 [Cam	-0.816492	1155	XP_011267102.2 glucosylceramidase isoform X2 [Cam	-0.400759	1155	XP_011267102.2 glucosylceramidase isoform X2 [Cam	-0.111129		0
1161	E2B0R2	0.584933	1161	E2B0R2	1.01637	1161	E2B0R2	0.268729	1161	E2B0R2	-0.123012		0
1162	XP_011267484.1 facilitated trehalose transporter Tret1 [Camponotus floridanus]	-0.0112381	1162	XP_011267484.1 facilitated trehalose transporter Tret1 [Camponotus floridanus]	1.03116	1162	XP_011267484.1 facilitated trehalose transporter Tret1 [Camponotus floridanus]	1.28794	1162	XP_011267484.1 facilitated trehalose transporter Tret1 [Camponotus floridanus]	1.15153		0
1163	XP_011267531.1 actin-5, muscle-specific [Camponotus floridanus]	0.468659	1163	XP_011267531.1 actin-5, muscle-specific [Camponotus floridanus]	-0.356822	1163	XP_011267531.1 actin-5, muscle-specific [Camponotus floridanus]	-0.815847	1163	XP_011267531.1 actin-5, muscle-specific [Camponotus floridanus]	-2.06599		0
1168	E2B286	0.787369	1168	E2B286	-0.410659	1168	E2B286	-1.34759	1168	E2B286	-1.13025		0
1171	XP_011268281.2 cytochrome b5 [Camponotus floridanus]	-0.261649	1171	XP_011268281.2 cytochrome b5 [Camponotus floridanus]	-0.126792	1171	XP_011268281.2 cytochrome b5 [Camponotus floridanus]	0.0384987	1171	XP_011268281.2 cytochrome b5 [Camponotus floridanus]	0.0916804		0
1173	E1ZZZ1	0.24487	1173	E1ZZZ1	1.20654	1173	E1ZZZ1	0.521414	1173	E1ZZZ1	0.42685		0
1174	XP_011268594.2 beta-galactosidase [Camponotus floridanus]	-1.17519	1174	XP_011268594.2 beta-galactosidase [Camponotus floridanus]	-3.15404	1174	XP_011268594.2 beta-galactosidase [Camponotus floridanus]	-2.14557	1174	XP_011268594.2 beta-galactosidase [Camponotus floridanus]	-0.846547		0
1176	XP_025270976.1 aldehyde dehydrogenase, dimeric NADP-preferri	-0.216423	1176	XP_025270976.1 aldehyde dehydrogenase, dimeric NADP-preferri	2.51675	1176	XP_025270976.1 aldehyde dehydrogenase, dimeric NADP-preferri	-0.712462	1176	XP_025270976.1 aldehyde dehydrogenase, dimeric NADP-preferri	0.440347		0
1177	E2A0E4	0.988904	1177	E2A0E4	-0.105966	1177	E2A0E4	-0.107401	1177	E2A0E4	0.162804		0
1178	XP_011268793.1 protein croquemort isoform X4 [Cam	0.55104	1178	XP_011268793.1 protein croquemort isoform X4 [Cam	-0.35143	1178	XP_011268793.1 protein croquemort isoform X4 [Cam	1.18029	1178	XP_011268793.1 protein croquemort isoform X4 [Cam	0.32278		0
1179	XP_011268819.2 uncharacterized protein LOC105258932 [Camponotus floridanus]	0.201272	1179	XP_011268819.2 uncharacterized protein LOC105258932 [Camponotus floridanus]	-1.10233	1179	XP_011268819.2 uncharacterized protein LOC105258932 [Camponotus floridanus]	-0.638497	1179	XP_011268819.2 uncharacterized protein LOC105258932 [Camponotus floridanus]	0.129498		0
1180	E2A0I9	0.112954	1180	E2A0I9	-0.675905	1180	E2A0I9	0.365713	1180	E2A0I9	-0.643475		0
1181	E2A0U6	0.0802189	1181	E2A0U6	0.581163	1181	E2A0U6	1.37949	1181	E2A0U6	-0.426327		0
1184	XP_011269203.1 extensin-like [Camponotus floridanus]	1.02088				1184	XP_011269203.1 extensin-like [Camponotus floridanus]	0.883581	1184	XP_011269203.1 extensin-like [Camponotus floridanus]	0.59838		0
1185	XP_011269299.2 glutaredoxin-C4 isoform X1 [Camponotus flor	-0.30551	1185	XP_011269299.2 glutaredoxin-C4 isoform X1 [Camponotus flor	-0.950637	1185	XP_011269299.2 glutaredoxin-C4 isoform X1 [Camponotus flor	0.725384	1185	XP_011269299.2 glutaredoxin-C4 isoform X1 [Camponotus flor	0.342158		0
1187	E2A1F2	-0.522137	1187	E2A1F2	0.584994	1187	E2A1F2	-0.422655	1187	E2A1F2	1.01295		0
1188	E2A1T1	-0.497334	1188	E2A1T1	-2.07957	1188	E2A1T1	-0.766014	1188	E2A1T1	-0.889381		0
1190	E2A2D1	-0.0351221	1190	E2A2D1	-1.34291	1190	E2A2D1	-0.202088	1190	E2A2D1	-0.464366		0
1193	E2A631	-0.322771	1193	E2A631	-0.763217	1193	E2A631	0.143089	1193	E2A631	0.462549		0
1194	E2A6E1	-0.766375	1194	E2A6E1	-1.58504	1194	E2A6E1	-1.3911	1194	E2A6E1	-0.678711		0
1195	XP_019882425.1 myosin	-0.614157	1195	XP_019882425.1 myosin	-2.4825	1195	XP_019882425.1 myosin	-2.18907	1195	XP_019882425.1 myosin	-1.6608		0
1197	E2A827	-0.506225	1197	E2A827	0.989001	1197	E2A827	0.816054	1197	E2A827	0.867867		0
1198	E2A8M9	0.582999	1198	E2A8M9	-1.45681	1198	E2A8M9	-2.02605	1198	E2A8M9	-0.754054		0
1200	XP_025266195.	0.856366	1200	XP_025266195.	0.240125	1200	XP_025266195.	0.880906	1200	XP_025266195.	-0.0123646		0
1201	E1ZWT7	0.343419	1201	E1ZWT7	0.579809	1201	E1ZWT7	-0.203186	1201	E1ZWT7	0.456911		0
1202	E2AG54	0.0573203	1202	E2AG54	0.306216	1202	E2AG54	1.17629	1202	E2AG54	1.12696		0
1208	E2AKK9	0.110852	1208	E2AKK9	0.445555	1208	E2AKK9	0.558652	1208	E2AKK9	-0.415627		0
1209	XP_019884420.2 alpha-amylase [Camponotus floridanus]	-1.49536	1209	XP_019884420.2 alpha-amylase [Camponotus floridanus]	0.331279	1209	XP_019884420.2 alpha-amylase [Camponotus floridanus]	0.167449	1209	XP_019884420.2 alpha-amylase [Camponotus floridanus]	0.331738		0
1210	XP_019884800.1 ba	-0.0631592	1210	XP_019884800.1 ba	-0.584961	1210	XP_019884800.1 ba	-0.512989	1210	XP_019884800.1 ba	-0.552532		0
1216	XP_019885340.1 uncharacterized protein LOC109610529 [Camponotus floridanus]	1.69528	1216	XP_019885340.1 uncharacterized protein LOC109610529 [Camponotus floridanus]	-0.87546	1216	XP_019885340.1 uncharacterized protein LOC109610529 [Camponotus floridanus]	-0.175285	1216	XP_019885340.1 uncharacterized protein LOC109610529 [Camponotus floridanus]	-0.222897		0
1220	XP_0	-0.090797	1220	XP_0	-0.115004	1220	XP_0	-0.775397	1220	XP_0	-0.511627		0
1222	XP_025262246.1 uncharacterized protein LOC105256493 [Camponotus floridanus]	0.579428	1222	XP_025262246.1 uncharacterized protein LOC105256493 [Camponotus floridanus]	-1.77108	1222	XP_025262246.1 uncharacterized protein LOC105256493 [Camponotus floridanus]	0.285272	1222	XP_025262246.1 uncharacterized protein LOC105256493 [Camponotus floridanus]	-0.318685		0
1224	XP_025262495.1 pheromone-binding protein Gp-9-like [Camponotus floridanus]	2.19966	1224	XP_025262495.1 pheromone-binding protein Gp-9-like [Camponotus floridanus]	0.402443	1224	XP_025262495.1 pheromone-binding protein Gp-9-like [Camponotus floridanus]	-0.994117	1224	XP_025262495.1 pheromone-binding protein Gp-9-like [Camponotus floridanus]	-0.382139		0
1233	XP_025262697.1 UDP-glucuronosylt	0.361202	1233	XP_025262697.1 UDP-glucuronosylt	0.615426	1233	XP_025262697.1 UDP-glucuronosylt	0.986818	1233	XP_025262697.1 UDP-glucuronosylt	-0.00789815		0
1234	E2ATE8	0.319323	1234	E2ATE8	0.520717	1234	E2ATE8	0.765278	1234	E2ATE8	0.352998		0
1235	XP_025262733.1 arginine kinase isoform X2 [Camponotus floridanus]	0.00424954	1235	XP_025262733.1 arginine kinase isoform X2 [Camponotus floridanus]	-0.829329	1235	XP_025262733.1 arginine kinase isoform X2 [Camponotus floridanus]	-0.970893	1235	XP_025262733.1 arginine kinase isoform X2 [Camponotus floridanus]	-1.52603		0
1236	XP_025262760.1 uncharacterized protein LOC105255829 [Camponotus floridanus]	1.02114	1236	XP_025262760.1 uncharacterized protein LOC105255829 [Camponotus floridanus]	-2.51501	1236	XP_025262760.1 uncharacterized protein LOC105255829 [Camponotus floridanus]	-0.121008	1236	XP_025262760.1 uncharacterized protein LOC105255829 [Camponotus floridanus]	0.643826		0
1237	XP_025262798.1 glucose dehydrogenase [FAD, quinone] [Camponotus floridanus]	1.22763	1237	XP_025262798.1 glucose dehydrogenase [FAD, quinone] [Camponotus floridanus]	1.80643	1237	XP_025262798.1 glucose dehydrogenase [FAD, quinone] [Camponotus floridanus]	0.185843	1237	XP_025262798.1 glucose dehydrogenase [FAD, quinone] [Camponotus floridanus]	-0.152539		0
1245	XP_025263040.1 maltase 1-like [Camponotus floridanus]	0.280902	1245	XP_025263040.1 maltase 1-like [Camponotus floridanus]	1.2671	1245	XP_025263040.1 maltase 1-like [Camponotus floridanus]	-0.420129	1245	XP_025263040.1 maltase 1-like [Camponotus floridanus]	-0.330653		0
1246	E2B003	-1.61863	1246	E2B003	0.65886	1246	E2B003	0.00868782	1246	E2B003	0.789686		0
1247	XP_025263076.1 maltase 1-like [Camponotus floridanus]	-0.458491	1247	XP_025263076.1 maltase 1-like [Camponotus floridanus]	-2.17905	1247	XP_025263076.1 maltase 1-like [Camponotus floridanus]	-0.697845	1247	XP_025263076.1 maltase 1-like [Camponotus floridanus]	-0.279793		0
1248	XP_025263077.1 maltase 1-like [Camponotus floridanus]	-1.64101	1248	XP_025263077.1 maltase 1-like [Camponotus floridanus]	-0.689174	1248	XP_025263077.1 maltase 1-like [Camponotus floridanus]	-0.203211	1248	XP_025263077.1 maltase 1-like [Camponotus floridanus]	0.252978		0
1250	E2AKU5	0.409079	1250	E2AKU5	0.752889	1250	E2AKU5	0.106174	1250	E2AKU5	0.168077		0
1253	XP_025263365.1 alpha-amylase A-like [Camponotus floridanus]	-3.49773	1253	XP_025263365.1 alpha-amylase A-like [Camponotus floridanus]	3.53416	1253	XP_025263365.1 alpha-amylase A-like [Camponotus floridanus]	-0.853858	1253	XP_025263365.1 alpha-amylase A-like [Camponotus floridanus]	-0.555887		0
1259	E2A460	0.534924	1259	E2A460	-0.355024	1259	E2A460	-0.245121	1259	E2A460	0.34024		0
1264	XP_025264147.1 uncharacterized protein LOC105250349 [Camponotus floridanus]	-0.103874	1264	XP_025264147.1 uncharacterized protein LOC105250349 [Camponotus floridanus]	0.226905	1264	XP_025264147.1 uncharacterized protein LOC105250349 [Camponotus floridanus]	2.47572	1264	XP_025264147.1 uncharacterized protein LOC105250349 [Camponotus floridanus]	0.433716		0
1269	XP_0252	-0.443425	1269	XP_0252	-2.77535	1269	XP_0252	-0.128607	1269	XP_0252	0.580638		0
			1271	XP_025264562.1 venom acid phosphatase Acph-1-like isoform X2 [Camponotus floridanus]	1.10549								#DIV/0!
1273	XP_025264610.1 lysosomal aspartic protease isoform X1 [Camponotus floridanus]	-0.720925	1273	XP_025264610.1 lysosomal aspartic protease isoform X1 [Camponotus floridanus]	-2.16769	1273	XP_025264610.1 lysosomal aspartic protease isoform X1 [Camponotus floridanus]	-0.667261	1273	XP_025264610.1 lysosomal aspartic protease isoform X1 [Camponotus floridanus]	1.7047		0
1274	XP_025264611.1 lysosomal aspartic protease isoform X2 [Camponotus floridanus]	0.163918	1274	XP_025264611.1 lysosomal aspartic protease isoform X2 [Camponotus floridanus]	-1.54942	1274	XP_025264611.1 lysosomal aspartic protease isoform X2 [Camponotus floridanus]	-0.34028	1274	XP_025264611.1 lysosomal aspartic protease isoform X2 [Camponotus floridanus]	0.339915		0
1275	XP_025264613.1 lysosomal aspartic protease isoform X3 [Camponotus floridanus]	-0.0788598	1275	XP_025264613.1 lysosomal aspartic protease isoform X3 [Camponotus floridanus]	-0.431751	1275	XP_025264613.1 lysosomal aspartic protease isoform X3 [Camponotus floridanus]	0.153882	1275	XP_025264613.1 lysosomal aspartic protease isoform X3 [Camponotus floridanus]	0.598401		0
1276	XP_025264718.1 mediator of RNA polymerase II transcription subunit 12 [Camponotus floridanus]	1.62851	1276	XP_025264718.1 mediator of RNA polymerase II transcription subunit 12 [Camponotus floridanus]	1.11108	1276	XP_025264718.1 mediator of RNA polymerase II transcription subunit 12 [Camponotus floridanus]	-2.79382	1276	XP_025264718.1 mediator of RNA polymerase II transcription subunit 12 [Camponotus floridanus]	-0.810716		0
1277	E2AG27	-0.488037	1277	E2AG27	-2.08641	1277	E2AG27	-0.217704	1277	E2AG27	-0.591183		0
1278	XP_025265121.1 serine protease 52 [Camponotus floridanus]	-0.738526	1278	XP_025265121.1 serine protease 52 [Camponotus floridanus]	-1.48119	1278	XP_025265121.1 serine protease 52 [Camponotus floridanus]	-1.60133	1278	XP_025265121.1 serine protease 52 [Camponotus floridanus]	-1.71375		0
1279	XP_025265136.1 lysosomal alpha-mannosidase isoform X1 [Camponotus floridanus]	0.361681	1279	XP_025265136.1 lysosomal alpha-mannosidase isoform X1 [Camponotus floridanus]	-0.709753	1279	XP_025265136.1 lysosomal alpha-mannosidase isoform X1 [Camponotus floridanus]	0.684621	1279	XP_025265136.1 lysosomal alpha-mannosidase isoform X1 [Camponotus floridanus]	0.467436		0
1280	E2ABS8	-1.25819	1280	E2ABS8	-1.62186	1280	E2ABS8	-1.75039	1280	E2ABS8	-0.604491		0
1281	E2AL32	-0.731642	1281	E2AL32	-0.686564	1281	E2AL32	-0.338164	1281	E2AL32	-0.355626		0
1282	XP_025265221.1 myosin-IB isoform X1 [Camponotus floridanus]	-0.823136	1282	XP_025265221.1 myosin-IB isoform X1 [Camponotus floridanus]	-0.85323	1282	XP_025265221.1 myosin-IB isoform X1 [Camponotus floridanus]	0.438128	1282	XP_025265221.1 myosin-IB isoform X1 [Camponotus floridanus]	-0.457344		0
1287	E2AD33	-0.135067	1287	E2AD33	1.06684	1287	E2AD33	-0.522144	1287	E2AD33	-0.4804		0
1290	XP_025265925.1 cytochrome P450 4C1-like [Camponotus floridanus]	-0.31835				1290	XP_025265925.1 cytochrome P450 4C1-like [Camponotus floridanus]	-1.48466	1290	XP_025265925.1 cytochrome P450 4C1-like [Camponotus floridanus]	0.450161		0
1291	E2AGD3	0.310635	1291	E2AGD3	0.962735	1291	E2AGD3	-0.801524	1291	E2AGD3	-1.09733		0
1292	E1ZXZ5	1.83662	1292	E1ZXZ5	1.70543	1292	E1ZXZ5	-3.98331	1292	E1ZXZ5	-0.920575		0
1298	XP_025266937.1 protein starmaker-like [Camponotus floridanus]	-0.457729				1298	XP_025266937.1 protein starmaker-like [Camponotus floridanus]	1.22019	1298	XP_025266937.1 protein starmaker-like [Camponotus floridanus]	0.729656		0
1300	E1ZYQ6	-0.182584	1300	E1ZYQ6	-2.4365	1300	E1ZYQ6	-1.19369	1300	E1ZYQ6	-0.519608		0
1303	E2B0F9	-0.204757	1303	E2B0F9	-1.53842	1303	E2B0F9	-1.14921	1303	E2B0F9	-0.99629		0
1306	E2AMN5	0.828861	1306	E2AMN5	0.28073	1306	E2AMN5	-0.44402	1306	E2AMN5	0.88355		0
1307	E2AWE3	0.972991				1307	E2AWE3	0.437818	1307	E2AWE3	0.919813		0
1309	XP_025267906.1 alpha-tectorin [Camponotus floridanus]	1.07427	1309	XP_025267906.1 alpha-tectorin [Camponotus floridanus]	0.0113578	1309	XP_025267906.1 alpha-tectorin [Camponotus floridanus]	-1.21886	1309	XP_025267906.1 alpha-tectorin [Camponotus floridanus]	-0.48009		0
1310	XP_025268048.1 peroxiredoxin-6-like [Camponotus floridanus]	-0.664406	1310	XP_025268048.1 peroxiredoxin-6-like [Camponotus floridanus]	1.05099	1310	XP_025268048.1 peroxiredoxin-6-like [Camponotus floridanus]	-1.40532	1310	XP_025268048.1 peroxiredoxin-6-like [Camponotus floridanus]	-0.43264		0
1311	XP_025268060.1 UDP-glucuronosyltransferase 2B20 isoform X3 [Camponotus floridanus]	-0.303399	1311	XP_025268060.1 UDP-glucuronosyltransferase 2B20 isoform X3 [Camponotus floridanus]	0.853739	1311	XP_025268060.1 UDP-glucuronosyltransferase 2B20 isoform X3 [Camponotus floridanus]	0.309718	1311	XP_025268060.1 UDP-glucuronosyltransferase 2B20 isoform X3 [Camponotus floridanus]	0.199982		0
1312	XP_025268117.1 uncharacterized protein LOC112639167 [Camponotus floridanus]	-0.362781				1312	XP_025268117.1 uncharacterized protein LOC112639167 [Camponotus floridanus]	0.392877	1312	XP_025268117.1 uncharacterized protein LOC112639167 [Camponotus floridanus]	0.32656		0
1313	XP_025268258.1 vitamin K-dependent protein C-like [Camponotus floridanus]	1.26585	1313	XP_025268258.1 vitamin K-dependent protein C-like [Camponotus floridanus]	1.11891	1313	XP_025268258.1 vitamin K-dependent protein C-like [Camponotus floridanus]	0.260207	1313	XP_025268258.1 vitamin K-dependent protein C-like [Camponotus floridanus]	0.0989608		0
1316	E2AGJ5	0.418231	1316	E2AGJ5	0.246215	1316	E2AGJ5	0.303455	1316	E2AGJ5	-0.150482		0
1319	E2A0E3	0.209085	1319	E2A0E3	1.52101	1319	E2A0E3	-0.099709	1319	E2A0E3	0.108083		0
1320	XP_025265358.1 17-beta-hydroxysteroid dehydrogenase 13-l	0.378497	1320	XP_025265358.1 17-beta-hydroxysteroid dehydrogenase 13-l	1.07345	1320	XP_025265358.1 17-beta-hydroxysteroid dehydrogenase 13-l	1.32035	1320	XP_025265358.1 17-beta-hydroxysteroid dehydrogenase 13-l	0.315711		0
1321	XP_025268998.1 collagen alpha-1(IV) chain [Camponotus floridanus]	0.548301	1321	XP_025268998.1 collagen alpha-1(IV) chain [Camponotus floridanus]	-0.278154	1321	XP_025268998.1 collagen alpha-1(IV) chain [Camponotus floridanus]	-0.241754	1321	XP_025268998.1 collagen alpha-1(IV) chain [Camponotus floridanus]	0.816261		0
1323	XP_025269112.1 titin isoform X4	0.653241	1323	XP_025269112.1 titin isoform X4	0.272395	1323	XP_025269112.1 titin isoform X4	0.578529	1323	XP_025269112.1 titin isoform X4	-0.887165		0
1324	XP_025269121.1 guanine deaminase [Camponotus floridanus]	-0.854548	1324	XP_025269121.1 guanine deaminase [Camponotus floridanus]	0.546216	1324	XP_025269121.1 guanine deaminase [Camponotus floridanus]	-0.955157	1324	XP_025269121.1 guanine deaminase [Camponotus floridanus]	0.0310259		0
1325	XP_025269126.1 guanine deaminase [Camponotus floridanus]	-2.92039	1325	XP_025269126.1 guanine deaminase [Camponotus floridanus]	-0.737949	1325	XP_025269126.1 guanine deaminase [Camponotus floridanus]	-1.46052	1325	XP_025269126.1 guanine deaminase [Camponotus floridanus]	-0.269679		0
1326	XP_025269140.1 guanine deaminase-like [Camponotus floridanus]	0.204476	1326	XP_025269140.1 guanine deaminase-like [Camponotus floridanus]	0.479377	1326	XP_025269140.1 guanine deaminase-like [Camponotus floridanus]	0.749584	1326	XP_025269140.1 guanine deaminase-like [Camponotus floridanus]	0.935912		0
1327	XP_025269141.1 guanine deaminase-like [Camponotus floridanus]	0.635355	1327	XP_025269141.1 guanine deaminase-like [Camponotus floridanus]	2.76387	1327	XP_025269141.1 guanine deaminase-like [Camponotus floridanus]	0.591241	1327	XP_025269141.1 guanine deaminase-like [Camponotus floridanus]	0.340554		0
1328	XP_025269163.1 uncharacterized protein LOC105257597 [Camponotus floridanus]	0.0904686	1328	XP_025269163.1 uncharacterized protein LOC105257597 [Camponotus floridanus]	-0.448536	1328	XP_025269163.1 uncharacterized protein LOC105257597 [Camponotus floridanus]	0.493404	1328	XP_025269163.1 uncharacterized protein LOC105257597 [Camponotus floridanus]	0.834927		0
1330	XP_025269200.1 t	-0.477106	1330	XP_025269200.1 t	0.309383	1330	XP_025269200.1 t	0.0531256	1330	XP_025269200.1 t	-0.122932		0
1332	XP_025269243.1 6-phosphogluconate dehydrogenase, decarboxylating [Camponotus floridanus]	0.192167	1332	XP_025269243.1 6-phosphogluconate dehydrogenase, decarboxylating [Camponotus floridanus]	0.653209	1332	XP_025269243.1 6-phosphogluconate dehydrogenase, decarboxylating [Camponotus floridanus]	-0.676121	1332	XP_025269243.1 6-phosphogluconate dehydrogenase, decarboxylating [Camponotus floridanus]	0.30669		0
1334	E2AWP0	0.652538				1334	E2AWP0	1.0145	1334	E2AWP0	1.01873		0
1337	XP_025269281.1 uncharacterized protein LOC112639471 [Camponotus floridanus]	0.502026				1337	XP_025269281.1 uncharacterized protein LOC112639471 [Camponotus floridanus]	0.429539	1337	XP_025269281.1 uncharacterized protein LOC112639471 [Camponotus floridanus]	0.407922		0
1341	XP_025269479.1 uncharacterized protein LOC105252707 [Camponotus floridanus]	-0.0495389	1341	XP_025269479.1 uncharacterized protein LOC105252707 [Camponotus floridanus]	-1.67979	1341	XP_025269479.1 uncharacterized protein LOC105252707 [Camponotus floridanus]	0.170494	1341	XP_025269479.1 uncharacterized protein LOC105252707 [Camponotus floridanus]	-0.476712		0
1342	XP_025269481.1 myogenesis-regulating glycosidase-like isoform X1 [Camponotus floridanus]	-3.04218	1342	XP_025269481.1 myogenesis-regulating glycosidase-like isoform X1 [Camponotus floridanus]	2.55282	1342	XP_025269481.1 myogenesis-regulating glycosidase-like isoform X1 [Camponotus floridanus]	-0.677468	1342	XP_025269481.1 myogenesis-regulating glycosidase-like isoform X1 [Camponotus floridanus]	-0.148608		0
1343	XP_025269493.1 myogenesis-regulating glycosidase-like [Camponotus floridanus]	0.0835258	1343	XP_025269493.1 myogenesis-regulating glycosidase-like [Camponotus floridanus]	0.993301	1343	XP_025269493.1 myogenesis-regulating glycosidase-like [Camponotus floridanus]	-0.327973	1343	XP_025269493.1 myogenesis-regulating glycosidase-like [Camponotus floridanus]	0.491452		0
1344	XP_025269497.1 cytochrome c oxidase subunit 6A1, mitochondrial [Camponotus floridanus]	0.925765	1344	XP_025269497.1 cytochrome c oxidase subunit 6A1, mitochondrial [Camponotus floridanus]	0.493171	1344	XP_025269497.1 cytochrome c oxidase subunit 6A1, mitochondrial [Camponotus floridanus]	0.505897	1344	XP_025269497.1 cytochrome c oxidase subunit 6A1, mitochondrial [Camponotus floridanus]	-0.259938		0
1347	XP_025269661.1 putative glutamate synthase [NADPH] isoform X1 [Camponotus floridanus	0.859408	1347	XP_025269661.1 putative glutamate synthase [NADPH] isoform X1 [Camponotus floridanus	0.440302	1347	XP_025269661.1 putative glutamate synthase [NADPH] isoform X1 [Camponotus floridanus	1.24786	1347	XP_025269661.1 putative glutamate synthase [NADPH] isoform X1 [Camponotus floridanus	0.227813		0
1348	E2AY69	0.0988392	1348	E2AY69	-0.151934	1348	E2AY69	-0.384355	1348	E2AY69	0.553287		0
1349	XP_025269698.1 myogenesis-regulating glycosidase [Camponotus floridanus]	0.354224	1349	XP_025269698.1 myogenesis-regulating glycosidase [Camponotus floridanus]	0.703065	1349	XP_025269698.1 myogenesis-regulating glycosidase [Camponotus floridanus]	0.831271	1349	XP_025269698.1 myogenesis-regulating glycosidase [Camponotus floridanus]	0.557023		0
1352	XP_025269798.1 serine protease inhibitor 3/4 isoform X3 [Camponotus floridanus]	-0.268556	1352	XP_025269798.1 serine protease inhibitor 3/4 isoform X3 [Camponotus floridanus]	-0.103015	1352	XP_025269798.1 serine protease inhibitor 3/4 isoform X3 [Camponotus floridanus]	0.0123775	1352	XP_025269798.1 serine protease inhibitor 3/4 isoform X3 [Camponotus floridanus]	0.567181		0
1357	XP_025269806	0.693067	1357	XP_025269806	0.260029	1357	XP_025269806	0.53031	1357	XP_025269806	-0.0472205		0
1358	XP_025269812.1 serine protease inhibitor 3/4 isoform X12 [Camponotus floridanus]	0.773406	1358	XP_025269812.1 serine protease inhibitor 3/4 isoform X12 [Camponotus floridanus]	-3.53528	1358	XP_025269812.1 serine protease inhibitor 3/4 isoform X12 [Camponotus floridanus]	-1.39777	1358	XP_025269812.1 serine protease inhibitor 3/4 isoform X12 [Camponotus floridanus]	0.195318		0
1361	E2AA82	0.866412	1361	E2AA82	1.10856	1361	E2AA82	-0.395707	1361	E2AA82	-0.799808		0
1365	E2ALT3	0.465236	1365	E2ALT3	-1.22453	1365	E2ALT3	-1.23517	1365	E2ALT3	-0.190428		0
1366	XP_025270286.1 putative aminopeptidase-2 [Camponotus floridanus]	-0.312946	1366	XP_025270286.1 putative aminopeptidase-2 [Camponotus floridanus]	-1.12547	1366	XP_025270286.1 putative aminopeptidase-2 [Camponotus floridanus]	0.882976	1366	XP_025270286.1 putative aminopeptidase-2 [Camponotus floridanus]	-0.774355		0
1367	E2AAT8	-1.04361	1367	E2AAT8	1.24649	1367	E2AAT8	-2.16133	1367	E2AAT8	-0.363955		0
1368	E1ZY72	-0.442909	1368	E1ZY72	0.118377	1368	E1ZY72	-0.0767206	1368	E1ZY72	0.363834		0
1369	XP_025270591.1 fatty acid synthase-like [Camponotus floridanus]	0.671984	1369	XP_025270591.1 fatty acid synthase-like [Camponotus floridanus]	1.0337	1369	XP_025270591.1 fatty acid synthase-like [Camponotus floridanus]	0.467435	1369	XP_025270591.1 fatty acid synthase-like [Camponotus floridanus]	-0.518454		0
1372	XP_025271103.1 ras-related protein Ral-a isoform X1 [Camponotus floridanus]	-0.108288	1372	XP_025271103.1 ras-related protein Ral-a isoform X1 [Camponotus floridanus]	-1.54497	1372	XP_025271103.1 ras-related protein Ral-a isoform X1 [Camponotus floridanus]	0.232849	1372	XP_025271103.1 ras-related protein Ral-a isoform X1 [Camponotus floridanus]	0.714657		0
1373	XP_025271294.1 protein Malvolio isoform X2 [Camponotus floridanus]	0.126805				1373	XP_025271294.1 protein Malvolio isoform X2 [Camponotus floridanus]	0.968018	1373	XP_025271294.1 protein Malvolio isoform X2 [Camponotus floridanus]	0.774744		0

## Sheet: LIMMA - YvM
id	Uniprot	Symbol	iBAQ.FieldMatA	iBAQ.FieldMatAA	iBAQ.FieldMatBB	iBAQ.FieldMatF_rep	iBAQ.FieldMatG	iBAQ.FieldMatH	iBAQ.FieldMatI	iBAQ.FieldMatK	iBAQ.FieldMatLmin1	iBAQ.FieldMatM	iBAQ.FieldMatNmin1	iBAQ.FieldMatO_rep	iBAQ.FieldMatP_rep	iBAQ.FieldMatQ	iBAQ.FieldMatR	iBAQ.FieldMatS	iBAQ.FieldMatT	iBAQ.FieldMatU	iBAQ.FieldMatV	iBAQ.FieldMatW	iBAQ.FieldMatX	iBAQ.FieldMatY_rep	iBAQ.FieldMatZ	iBAQ.FieldYoung2002	iBAQ.FieldYoung2004	iBAQ.FieldYoung2007	iBAQ.FieldYoung2009	iBAQ.FieldYoung2011	iBAQ.FieldYoung2012	iBAQ.FieldYoung2014	iBAQ.FieldYoung2016	iBAQ.FieldYoung2018	iBAQ.FieldYoung2020	iBAQ.FieldYoung2021	iBAQ.FieldYoung2022	iBAQ.FieldYoung2023	iBAQ.FieldYoung2026	iBAQ.FieldYoung2027	iBAQ.FieldYoung2028	iBAQ.FieldYoung2029	iBAQ.FieldYoung2030	iBAQ.FieldYoung2033	iBAQ.FieldYoung2036	logFC	abs(logFC)	t.ord	t.mod
1051	E2AC28	GMC_OxRdtase_N domain-containing protein	-0.415034	0.383528	0.212393	3.04525	0.060254	-0.88411	-2.60905	-0.801608	1.19767	3.78436	5.81696	5.6732	1.39076	1.06339	1.78525	0.835603	-0.889931	0.113612	-1.62453	1.25264	0.475281	3.81534	-1.30638	6.52511	5.58612	7.92513	3.22827	4.44407	5.66969	6.52872	2.80307	5.76109	7.77812	6.26997	6.32657	7.85061	5.1636	6.54779	4.98501	7.75858	2.19704	6.47283	2.40601	-4.63855	4.63855	-7.50089	-7.91471
1342	XP_025269481.1 myogenesis-regulating glycosidase-like isoform X1 [Camponotus floridanus]	NA	5.15729	5.27552	2.65764	5.00075	4.96866	-0.259533	4.52036	-0.299363	3.78974	8.18951	8.30766	7.66576	8.00189	4.71367	3.80944	6.17289	3.35269	7.0795	1.89087	9.00254	4.75248	9.27805	7.13378	8.98756	8.87423	10.6147	5.15741	7.4159	9.37663	9.91253	4.68221	8.94382	9.50817	8.67125	9.40796	9.24426	9.1365	9.63299	7.09446	8.88396	7.15584	7.92424	8.45844	-3.22972	3.22972	-4.77468	-5.09404
1253	XP_025263365.1 alpha-amylase A-like [Camponotus floridanus]	NA	-0.627296	-0.488006	-0.703566	1.95607	-0.0882936	0.291907	-0.428672	-0.816677	-3.08612	5.97845	5.18006	5.78647	-3.73418	-0.370848	-0.014057	-2.39598	-2.92806	2.48243	-1.35054	5.26271	0.250917	0.967217	-0.310068	4.38622	6.26816	2.03191	1.55469	5.16345	7.0109	4.79158	3.01861	0.366426	6.28957	7.37938	7.79283	5.62054	4.9112	6.90673	3.98985	8.03837	1.69597	-2.45963	1.1588	-3.82561	3.82561	-4.44733	-4.85119
457	E2ACR9	Calmodulin	1.56744	3.28307	1.24586	0.187228	-0.360499	0.421897	-0.018005	-0.264345	-0.120385	3.95241	5.1821	2.56938	0.896883	4.14423	-0.00969521	4.36399	1.12526	5.74283	0.701151	4.85353	2.79536	-0.0653453	6.22637	-4.19592	4.51444	6.77829	2.63642	4.88189	5.54317	6.47981	1.68721	6.5629	6.79312	5.82992	6.57861	5.90227	6.09668	6.80407	6.38728	4.07607	5.28392	5.53846	6.85106	-2.94624	2.94624	-4.05173	-4.3562
447	E2AC94	Hexamerin	7.25913	3.21854	4.65978	2.74759	5.14047	1.10126	5.3758	1.06141	2.13735	4.89227	4.66308	10.5519	4.16839	1.46734	8.19277	1.32689	0.0580524	1.44661	1.62554	4.58617	6.30555	0.0425515	2.46071	3.12065	-1.11009	-0.316755	0.927196	4.26243	-2.89129	-1.23483	5.32215	-2.63724	-0.0800812	-0.288008	0.382755	0.370236	2.8663	-1.22779	3.45037	-2.10042	0.201166	2.30391	-0.0276699	3.10879	3.10879	4.02347	4.35074
1109	XP_011263078.2 alpha-amylase 1 isoform X1 [Camponotus floridanus]	NA	8.53292	9.09427	5.01858	6.90652	8.11702	2.13208	9.4874	3.23505	8.05684	10.1854	10.1207	7.93419	10.5928	10.3185	5.44141	10.9746	8.19615	10.1123	4.76723	10.1293	7.39684	10.9073	10.6152	10.5763	9.56119	10.7849	9.9076	9.12704	11.6938	11.7123	8.07812	11.36	11.9187	10.9809	12.0788	10.91	11.5007	10.9383	7.76775	10.8266	10.8049	10.6414	11.5684	-2.45113	2.45113	-3.94521	-4.16543
1224	XP_025262495.1 pheromone-binding protein Gp-9-like [Camponotus floridanus]	NA	3.65141	1.91588	4.05611	7.28815	4.30641	0.909901	4.60997	3.8181	2.77713	2.64379	3.06062	3.75344	2.03771	-1.71109	5.14806	2.74774	1.62987	2.71286	4.07118	2.32935	3.34028	1.65666	1.47998	5.77551	-2.12759	1.10172	1.39497	-1.204	0.971537	-2.38543	-0.00379972	-1.99199	1.82042	-0.808746	1.61912	0.527451	2.54502	0.892184	4.02877	1.56775	-0.93134	2.21715	2.02552	2.11496	2.11496	3.64028	3.80759
1325	XP_025269126.1 guanine deaminase [Camponotus floridanus]	NA	7.13562	5.91017	-1.79967	0.740148	0.584292	-0.95116	2.75971	-1.13078	0.983993	0.962562	5.64926	7.97439	8.44856	-1.61047	-0.95115	4.8735	-3.81399	5.62582	2.11357	6.04639	-0.499189	1.95312	4.70055	4.961	4.24486	1.31314	0.98551	7.20047	6.8543	6.75202	8.29633	8.50542	4.00845	9.03131	9.08975	7.49632	8.02312	5.71553	0.165744	0.954734	6.87567	8.08136	6.18112	-3.31484	3.31484	-3.33939	-3.67643
763	E2ARJ0	Guanine deaminase	2.84612	2.90541	-2.25181	-0.483845	-1.01921	-0.797087	-1.33874	-1.7607	-2.46374	-0.446571	1.80166	5.39728	5.58733	-2.10456	-4.07802	1.20627	-7.00517	1.79168	-2.47343	1.28512	-3.78634	-0.995228	1.80228	0.907103	-0.429316	1.21179	-1.77821	5.44039	1.72748	1.45481	5.24162	5.03863	0.633228	4.56684	5.60505	3.68244	5.18277	1.48639	-1.79879	-2.53103	3.03595	5.34888	3.10784	-2.63414	2.63414	-3.02675	-3.3044
1246	E2B003	Aamy domain-containing protein	10.475	11.6209	11.1802	9.24074	11.4879	9.20336	11.8543	6.52869	11.6659	13.1311	12.5219	10.775	11.9814	12.142	10.3816	12.9503	10.741	12.7491	10.4276	12.9572	11.3152	12.7324	12.9662	12.5431	13.6101	13.9332	12.9245	11.4031	12.851	14.292	11.4484	14.2715	14.5679	14.2444	13.3539	13.7998	12.2834	13.1907	10.1485	13.7326	13.5881	13.235	13.6838	-1.80618	1.80618	-4.30156	-4.22239
82	E1ZVQ8	Prostatic acid phosphatase	-2.20001	-3.29055	-0.729776	-2.58053	-3.31213	-2.72089	-1.51443	-0.277512	-2.34351	-1.20475	-0.558172	-1.6163	-0.178165	0.497918	0.493559	1.67909	-1.25349	0.0906667	-2.7866	-1.90214	-2.73676	0.308196	-0.557647	-0.410237	0.635578	0.915042	0.112021	-3.75375	0.173792	2.51057	0.733203	0.758873	2.89156	-0.34085	1.95543	-0.91602	3.04075	1.0089	-1.00349	1.58594	0.88138	-0.17965	-0.323582	-1.76134	1.76134	-3.94581	-3.93012
1248	XP_025263077.1 maltase 1-like [Camponotus floridanus]	NA	8.39483	9.20653	7.93512	5.84117	7.91731	5.44958	8.93382	2.57047	7.72893	9.47387	9.57279	7.23237	9.52827	8.80458	5.9732	9.69524	7.11739	9.31609	7.67256	10.4886	8.22309	9.02037	9.54632	9.8945	10.5439	10.0401	9.24184	8.12789	10.2687	11.072	7.13905	11.517	10.891	10.9781	10.1256	10.4339	9.59393	10.2373	7.00237	9.34979	10.5087	9.89468	11.1392	-1.82856	1.82856	-3.83651	-3.87581
443	E2AC27	GMC_OxRdtase_N domain-containing protein	12.3265	12.3143	10.2033	9.28223	11.2853	7.91065	11.8812	6.36977	11.7378	12.0682	11.8131	11.1003	12.8154	11.9975	7.01803	12.8678	10.3864	12.3702	8.85683	12.2816	11.5797	12.175	12.9539	13.0081	12.5425	12.9878	12.1031	11.0295	12.8359	13.3532	11.0596	13.634	13.6024	13.0013	13.0295	12.9205	12.9465	13.2577	10.2155	12.5227	13.2807	12.4204	13.8592	-1.65463	1.65463	-3.54296	-3.56409
1192	XP_011269845.1 dolichyl-diphosphooligosaccharide--protein glycosyltransferase subunit 2 [Camponotus floridanus]	NA	1.51487	-0.192456	-2.97764	0.831838	-4.49323	-2.30872	-0.862795	-1.03025	-2.31346	0.101288	-2.00084	1.75388	0.219775	-1.36148	-1.50306	-0.490932	-2.71478	-1.93379	-0.29261	-0.751963	-1.42698	-0.898749	1.25892	1.61018	-0.910084	-1.49374	-2.86488	3.0679	2.74008	-1.30833	2.18657	2.50263	-1.83011	1.43606	-0.249116	2.80846	1.29738	0.684856	1.5905	1.51607	-1.39785	3.92648	1.918	-1.81256	1.81256	-3.44341	-3.54485
1085	XP_011259279.2 venom carboxylesterase-6 [Camponotus floridanus]	NA	4.8259	3.67891	3.98267	-0.924753	3.35681	-1.58859	2.71792	-1.54237	3.48527	4.13476	4.58065	3.57618	5.99257	2.75681	1.95814	4.555	2.32301	6.26297	3.96459	6.11788	4.18696	6.04114	5.00295	5.46394	6.481	5.71144	5.17829	4.11398	6.22663	6.13017	3.02673	6.47802	6.72303	4.16545	6.55944	6.8904	5.99449	4.85824	1.61252	4.98984	5.28887	5.30291	6.85327	-1.94829	1.94829	-3.37997	-3.53116
223	XP_019885627.2 uncharacterized protein LOC105259477 isoform X10 [Camponotus flor	NA	0.950519	0.640704	1.35417	6.85727	1.64699	4.50748	2.36227	4.63078	2.16759	2.22294	1.86404	3.16441	3.47744	1.15652	5.63037	0.563278	0.535679	-0.414417	3.08343	-0.00807164	2.95389	4.13419	2.13223	2.96942	-0.546233	-0.577855	1.16327	-1.2894	-0.409956	-1.3482	1.27463	0.525469	-0.345592	0.361873	-0.215588	-0.995216	3.07046	-0.370538	0.813861	-0.495731	1.98221	2.70494	3.92609	1.80809	1.80809	3.42842	3.53058
889	E2AXR8	Uncharacterized protein	0.226547	-0.749882	0.0818686	-1.06881	-0.187791	-1.69329	-1.41211	0.651664	0.333315	-2.82117	-0.815942	1.13633	3.57796	1.26723	0.105899	2.18369	0.627802	-1.99634	-0.0768693	0.315861	-1.53891	-0.628837	-2.3719	-0.188152	-0.402526	0.517621	1.10881	5.48945	1.75833	1.21999	4.63235	1.68953	0.722206	0.211028	-0.0665154	-2.22775	4.76749	1.5563	4.19564	0.105616	0.841246	4.93433	1.57527	-1.83304	1.83304	-3.34024	-3.46291
390	E2AAA4	Beta_elim_lyase domain-containing protein	-0.785355	-1.64259	1.41746	-0.109727	-0.430975	0.406621	-1.14048	1.10036	-2.19821	-0.611303	-3.14989	0.349268	-2.21847	-1.61802	-0.445848	1.23572	-1.50748	-0.264585	-0.941517	-0.733325	-2.89217	-3.05947	-0.561814	0.230187	0.0766824	1.9539	0.624802	-2.70141	0.297446	1.94496	0.666913	1.16037	-0.5564	0.45037	0.693709	-0.0667886	1.59168	0.879747	2.19407	1.06385	0.280341	-2.27161	1.94501	-1.38384	1.38384	-3.50156	-3.38314
1031	E2A7K7	Apolipophorins	6.77033	6.79598	8.28065	7.70271	6.85325	2.52435	7.52076	6.79252	5.53129	7.22037	9.2924	10.6516	7.77682	4.5539	10.8272	6.51425	3.16312	5.66311	6.41219	6.58322	6.21392	6.65379	6.39145	7.71253	2.31922	4.77833	2.48219	5.92001	7.34097	2.78793	4.76062	3.2438	3.25409	2.92859	5.41128	3.07853	7.73144	3.09136	9.10249	5.98316	3.79631	5.67386	7.14663	1.88541	1.88541	3.08343	3.24862
1216	XP_019885340.1 uncharacterized protein LOC109610529 [Camponotus floridanus]	NA	2.80076	4.20415	5.38362	8.76805	4.88584	7.55647	4.55483	6.56847	3.9413	4.12331	3.99508	1.9105	3.52407	2.8159	6.47547	4.84123	3.86411	3.38656	5.08791	3.37056	4.94297	6.72589	5.28185	5.20932	3.19625	2.9591	3.78069	2.79062	3.76583	1.53639	4.15136	1.1019	4.19518	1.0185	3.25005	1.15774	5.48947	4.47862	1.98256	2.36186	3.17517	3.59434	5.44078	1.50773	1.50773	3.22592	3.24569
866	E2AWM7	Uncharacterized protein	5.25145	5.43425	7.07672	9.75838	6.12218	6.90274	4.30792	8.48776	6.34103	4.21023	4.66951	1.46657	3.86584	5.03489	7.9358	6.60675	4.76427	4.96136	6.6004	3.30854	6.35375	7.53498	6.23299	4.59367	4.63294	2.29592	4.16459	3.40021	3.83128	5.24601	5.11531	2.9993	5.15249	3.60663	5.18711	1.77174	6.49154	6.87412	-0.348267	0.637892	4.19927	4.3648	6.50409	1.7565	1.7565	3.11044	3.23941
1183	E2A159	Chitin-binding type-2 domain-containing protein	-0.536035	-1.07027	1.03437	-2.96489	-0.440159	-2.08137	-0.491505	0.549221	1.90526	1.90857	-0.686785	1.39875	3.00479	1.98597	-0.793579	0.895319	2.09436	-1.45496	0.485545	1.95596	-1.28715	0.309864	0.5876	-2.4084	-0.343842	0.608815	-2.4039	-0.570703	-1.52755	-1.41536	-2.32328	-3.23276	-0.321252	-1.58483	0.22426	-0.605547	-0.206655	-0.463969	-3.40122	-0.307686	-1.34271	0.598698	-1.16878	1.38413	1.38413	3.28592	3.22801
970	E2B1W9	Cytochrome P450 4g15	-1.39041	-0.40548	1.56497	0.897088	1.91815	1.58719	-0.416438	-0.448937	-0.411098	1.398	-0.796119	0.123919	1.13101	1.30738	-0.557748	0.805323	1.98401	0.380849	-1.18431	2.38883	1.1912	2.0419	-0.931618	-0.652737	-2.82167	-2.11393	-0.598895	-0.451756	-0.0700189	0.767973	0.559459	-1.38249	1.35753	-0.542207	0.709262	0.239168	-1.6631	0.146557	-3.90716	-0.535293	-0.611601	-1.02469	-2.30176	1.27433	1.27433	3.36921	3.21521
485	E2ADR1	Fibrillin-2	-1.36105	1.87005	-1.99994	-5.71312	-2.6314	0.61941	-3.10666	-1.57402	-3.71823	-2.64343	-1.30817	-0.235377	-1.61466	-0.374039	-0.188285	-1.45869	0.674612	-1.20266	-3.40148	-2.63003	-3.02906	-1.15696	-0.695378	-0.200711	1.26891	0.154459	1.73499	-1.56872	0.351087	0.956414	-5.11687	0.239434	-0.265004	3.17052	2.47909	0.560665	-1.69021	-1.95787	-0.684958	-0.0284972	-1.0957	-0.593787	2.82628	-1.63039	1.63039	-3.00792	-3.11204
213	E2A1T0	M20_dimer domain-containing protein	-0.819521	-3.5144	-1.80307	0.589154	-2.74174	0.474834	0.711246	1.70304	0.182816	-0.814973	-3.10623	3.63273	1.76204	0.702926	0.153821	-1.25454	-3.48176	-3.57634	-0.130945	-3.91033	-4.15182	-3.5688	-1.22949	1.58121	-0.2629	0.0497368	0.077911	2.7746	-0.446004	-0.386863	-0.110527	3.39051	-0.660087	-2.57458	0.725575	0.78842	0.885262	-1.222	3.87199	1.0253	0.266984	1.81023	1.43405	-1.70274	1.70274	-2.92763	-3.06267
1357	XP_025269806	NA	1.42786	-0.298685	2.26971	0.866568	1.06108	0.749768	1.49227	1.65125	1.28285	0.841005	2.88144	1.99747	2.42402	1.6687	3.38063	0.438809	-1.92456	-0.225352	-0.564853	0.436147	1.1178	0.0547401	0.97414	0.774798	0.719116	-0.237934	-0.755228	-0.397459	-2.85765	-1.27606	-0.664512	2.18436	0.89125	-0.760809	-1.20725	0.0621572	1.41942	0.0785268	0.709609	-1.62582	-1.48445	0.848777	0.796473	1.18273	1.18273	3.22207	3.04757
1209	XP_019884420.2 alpha-amylase [Camponotus floridanus]	NA	4.70499	3.0143	1.70649	1.01148	0.879052	3.67902	3.01422	0.195718	2.64529	5.96671	6.29167	6.69801	5.65542	4.09808	3.04908	7.3516	2.03945	4.60994	-0.519758	6.39015	2.8335	7.83635	4.94556	4.74336	4.61665	4.47513	5.99895	5.69784	8.03526	6.66951	4.34762	5.57004	5.9189	4.97048	7.03465	5.49794	6.06033	4.63303	2.73594	6.70289	4.88784	5.05537	6.61193	-1.68291	1.68291	-2.90375	-3.0361
1045	E2A9W2	Thioredoxin domain-containing protein	5.22293	4.72813	3.91711	3.9916	0.333877	3.81695	-3.58926	5.21496	-1.84302	-2.81189	0.686014	0.914676	4.14422	5.86943	3.1712	4.18804	2.39509	4.13203	0.0621898	2.84849	5.26827	-2.30171	2.5048	2.46802	4.02881	3.7515	2.74374	4.94712	5.88673	5.42379	4.19757	4.70053	4.58078	4.8221	6.0598	3.81017	5.5918	6.0138	3.52852	3.31836	5.39943	4.83708	-0.523153	-1.98089	1.98089	-2.78823	-2.99066
1145	E2AY02	Carboxypeptidase	11.0793	10.046	10.1015	6.57473	8.62943	8.82582	9.79279	5.99555	9.71206	9.50239	10.2194	9.05184	10.3525	10.0597	5.65762	10.1902	8.00984	9.55543	9.40257	10.4669	9.71631	10.0894	11.0546	10.827	10.4188	11.2723	9.30096	9.00256	11.9542	11.3812	8.28208	11.765	10.5859	11.1977	11.7915	10.6444	11.0695	10.6313	8.11263	10.0485	11.0957	10.4023	10.9943	-1.23081	1.23081	-3.0749	-2.98117
1242	XP_025262903.1 phospholipase A1-like isoform X1 [Camponotus floridanus]	NA	3.64185	3.01965	-0.00906154	3.20625	-1.77815	0.972202	1.94584	-0.684464	3.37635	2.26677	3.17608	2.54563	4.42675	1.54033	0.188102	0.603408	-2.46756	2.40999	-0.00263753	1.43998	1.02761	3.61738	1.9453	4.41642	2.73926	4.11877	3.28125	3.68358	6.25762	4.54697	-0.0292336	2.33017	3.53761	0.708974	5.0949	2.67962	4.94228	2.24882	0.804347	2.73426	0.333093	3.66124	3.58804	-1.50096	1.50096	-2.81975	-2.90844
376	E2A9Y0	ATP-dependent RNA helicase bel	-0.772128	-0.884695	-1.17608	-0.921515	0.990655	-1.98036	0.607802	1.10604	0.74363	2.38473	1.48989	-0.76701	2.31772	1.06341	0.81327	-0.864004	0.452326	-0.0278463	0.47724	-0.285608	1.0865	1.79259	0.82859	0.0987473	-2.2833	-0.364973	-0.625282	-2.2046	-1.93441	0.00627203	-1.2007	0.445279	0.149448	0.45483	-0.163381	-0.678822	-2.02693	0.22904	-2.70717	0.653855	-0.446269	-2.35074	0.676003	1.08214	1.08214	3.07958	2.8733
363	E2A972	Tetraspanin	1.59896	-0.444707	0.569963	1.29753	-0.907111	0.469235	1.29768	0.370152	0.446289	1.97311	0.957965	3.86255	2.07861	-2.41748	0.634663	-0.748017	1.05831	-0.318264	0.402872	-0.231997	-1.55722	0.634075	0.14981	1.34996	-0.122552	-0.140616	-0.472407	-1.85854	-0.920086	-1.31919	0.605847	-1.5749	-1.61544	0.964997	-1.53663	-0.56436	-1.23203	-0.344224	-3.44128	-0.818172	-0.154613	-0.941138	1.30226	1.12761	1.12761	2.96945	2.837
521	E2AEN9	Cuticlin-1	-0.128735	0.909469	0.599817	0.0197393	2.49308	-0.278635	3.61179	-0.771308	2.53368	2.88237	2.44286	3.82853	-0.997532	1.93285	-0.783592	2.66849	-1.69495	3.01793	1.08954	2.50769	2.41959	3.94284	3.19178	-0.303516	3.37169	4.15682	2.61308	1.10016	2.14428	4.82845	0.686122	4.55246	6.79553	4.08094	3.76212	3.65264	2.49325	2.39793	-0.237896	2.94514	3.88546	3.33652	3.44006	-1.44431	1.44431	-2.73671	-2.81861
1267	XP_025264387.1 aminopeptidase N-like [Camponotus floridanus]	NA	0.0454478	-0.199552	0.328723	1.63769	2.71892	1.4039	0.229086	0.494424	-0.0804262	0.609122	1.32955	0.874916	0	-2.15545	-1.1205	-1.53417	-0.624697	-1.07579	-0.620922	0.601148	0.667514	1.07268	6.17853	-2.68927	-0.861956	0.785886	-0.669095	-3.06083	-1.88771	1.6363	0.436641	-2.77238	-1.52236	0.197419	1.64448	-2.21144	-1.43595	0.298146	-3.6008	0.144166	0.575914	-1.70117	-0.916067	1.34921	1.34921	2.73362	2.78094
464	E2AD19	Uncharacterized protein	-0.0822443	0.179894	1.7534	-0.752123	1.78237	0.639648	1.22985	-0.835174	0.815347	-1.06716	0.373389	4.10608	1.55292	2.00555	0.011314	-0.626167	1.64109	1.1607	-0.268016	-1.86067	-0.382378	2.54916	0.268225	-1.27747	-1.02533	-1.16575	-1.16109	-4.46054	-2.21246	-0.56116	0.756022	-0.747169	-1.88228	-0.388033	0.421925	1.57618	0.0867473	-0.86961	-0.361036	1.18698	0.787627	-0.418615	0.577846	1.17404	1.17404	2.82324	2.76455
722	E2APK8	Uncharacterized protein	-0.94202	-0.0658805	0.0139551	5.4522	0.176086	2.93276	-1.94371	-0.52395	-0.539525	0.888604	0.742879	1.27067	1.80438	-0.374755	-3.0118	-0.62387	0.463721	-1.91882	1.72338	-0.324664	0.138173	5.70188	0.642433	-1.09223	-1.67018	-1.16699	0.877475	-3.26361	-1.40069	0.329596	-1.22029	-0.0890274	-1.36014	-2.0981	-1.58391	1.35588	1.00463	-0.170104	-4.88899	-0.159623	-0.560764	-1.47987	-0.202867	1.44991	1.44991	2.62232	2.72194
329	E2A7N6	Aldo_ket_red domain-containing protein	0.994655	-1.40736	-0.633819	-2.62067	-1.5617	-0.531761	2.56	-0.31873	0.828417	-2.07823	-2.19899	-3.41929	-1.08728	-1.37413	-0.466433	-2.9666	-0.627936	-1.62883	-0.201969	-0.302934	-1.6984	0.785297	-2.18196	0.16895	-0.335489	-0.1201	-1.54767	-0.0179678	0.254148	1.86427	-0.664512	0.761177	-0.898449	-0.120539	-0.587187	0.440016	1.38072	0.0203553	2.81461	-0.28882	1.41416	0.324019	-2.04286	-1.10349	1.10349	-2.81008	-2.71029
1236	XP_025262760.1 uncharacterized protein LOC105255829 [Camponotus floridanus]	NA	11.0521	9.85858	10.1237	9.52488	9.68472	9.53776	9.51721	9.70716	10.4282	10.4248	10.0259	8.87857	10.1552	10.8053	9.891	11.0922	9.09268	10.0222	8.93331	9.77743	10.7595	10.2711	10.6533	9.84355	8.82938	9.31679	9.02925	7.35647	10.1065	9.42057	7.96272	10.3661	9.41684	9.65694	10.5132	8.39246	9.69672	9.71196	6.31022	9.56788	9.52821	8.59602	9.89509	0.833588	0.833588	3.24682	2.67621
1255	E2AN04	Cytochrome P450 6a2	-0.262576	-0.779693	-1.63886	-0.517864	-2.04534	-0.622285	-0.871998	-1.79483	-0.697944	-1.11774	0.498538	-1.07521	-0.96247	-0.723045	0.101364	-2.11612	-1.24621	-0.933109	0.935052	-1.3876	-0.356975	0.176083	-1.72701	-0.810307	-0.283221	0.81984	0.67286	1.89814	0.454546	-0.0523985	0.912321	0.548361	1.91181	-0.611301	2.10706	0.580874	-1.09574	1.0209	-2.01598	0.625391	-2.53087	-0.807223	-1.28923	-0.93609	0.93609	-2.93968	-2.65136
180	E2AUU4	Histone H2B	4.91131	5.06923	6.08865	4.69497	2.08993	1.87755	-0.0215553	2.43322	1.23434	2.21948	1.88163	5.81656	4.97374	1.02665	1.7935	3.14566	2.1783	2.5863	1.76147	3.03685	4.78819	1.90706	3.07259	1.914	1.77301	2.31004	0.694946	6.26423	-2.01259	1.65815	4.68343	1.79231	3.11326	-0.211348	0.190765	2.45349	-0.297572	1.94896	0.69239	0.767528	3.60659	1.82636	-1.01473	1.37345	1.37345	2.51238	2.60301
229	E2A2I3	60S ribosomal protein L9	2.73559	0.0145805	0.0158124	0.736967	0.633506	-1.75757	-2.62636	0.644378	1.08345	-0.591755	-0.451522	-0.97228	0.292889	-0.609044	-0.822494	2.37102	-0.648064	-0.935841	-0.286226	0.079373	-0.912184	-0.436076	0.727887	-0.443556	1.19764	0.154526	0.540528	-1.80473	3.75743	2.77165	-0.0243939	1.91986	3.13913	-0.757004	2.49773	1.93282	1.85587	-0.762391	0.340081	0.177838	1.12646	0.492108	1.79965	-1.07008	1.07008	-2.65481	-2.57867
273	E2A4U9	Guanine deaminase	0.00166713	-0.512211	-1.17941	-1.84076	-0.588886	2.02863	-0.271728	2.57137	0.381513	1.8246	1.50023	-0.21769	2.52363	0.0911848	-2.46478	1.96007	-1.87063	1.72229	1.4788	2.97107	-0.5439	2.14986	1.62338	3.33146	2.64371	2.87894	1.99365	-4.76165	1.86319	3.75239	-0.391323	3.56916	4.20844	3.44321	1.77935	2.95589	1.32542	2.0769	-2.34087	3.1753	2.75963	2.8602	2.85817	-1.41913	1.41913	-2.45831	-2.56885
1292	E1ZXZ5	Arylphorin subunit alpha	5.71571	5.40885	6.59746	5.39612	6.29191	7.09396	5.71833	5.75438	5.31387	7.64232	9.69918	12.1048	6.29051	6.50516	9.82766	5.11342	5.22468	5.07828	5.11713	5.8663	5.65726	5.32792	5.2188	5.72627	2.47338	7.57268	2.07647	9.78468	9.21689	3.69685	5.58286	2.71691	2.94178	0.616289	5.28203	2.19683	8.38411	2.89676	8.9049	2.47905	2.22726	5.04893	5.85797	1.64907	1.64907	2.33937	2.50716
114	E1ZXJ7	Tyrosinase_Cu-bd domain-containing protein	-0.653961	1.33841	0.731695	7.34349	-0.980093	-1.87295	-1.3699	1.76177	-0.197222	0.132937	-0.0444365	6.32759	3.17187	-1.01785	2.53698	-0.0725136	0.223261	-3.00213	-1.09698	-1.63496	0.535387	-0.645514	-2.92893	1.37765	1.30583	2.50667	1.96512	3.24058	3.60929	-0.563338	-3.46374	4.17485	3.90424	0.374317	3.58802	2.40585	2.3573	0.518229	3.96343	-0.590871	3.71253	2.19977	3.59172	-1.63557	1.63557	-2.32775	-2.49384
1094	E2AMM9	Cystinosin-like protein	-1.3583	4.07938	4.45756	4.10634	-0.118261	-0.320345	3.59698	2.46289	2.06774	1.17357	0.64124	0.55219	-1.25368	0.725491	3.36037	4.79657	-1.05993	-1.37807	-1.35525	2.34662	2.61484	0.322109	2.43915	-2.157	-1.67227	0.77524	0.107536	-0.0454422	0.163239	5.00848	2.64859	-0.794689	1.0859	-2.23998	-1.56218	-0.308	-2.1108	1.4515	0.692406	0.167387	-0.58527	-2.29383	1.75483	1.42612	1.42612	2.37153	2.49284
1263	XP_025263904.1 cytochrome P450 9e2-like isoform X2 [Camponotus floridanus]	NA	0.0606148	0.237486	0.245448	-1.70199	0.213145	0.406995	0.765353	1.14105	1.97701	2.76545	-1.5097	-3.25503	-0.0899926	-0.106893	1.4482	-0.0675913	1.25388	0.875321	1.64408	1.84065	0.309704	0.7313	-0.811293	-0.629268	-0.440155	-0.796314	0.307644	-3.7227	-0.394765	-1.9104	-2.2888	1.19796	0.399135	-1.12092	-1.2924	0.547632	-3.14391	-0.0194253	-0.178442	0.5363	-0.291616	-0.725097	0.778548	1.0234	1.0234	2.55979	2.48097
347	E2A8Q4	WD repeat-containing protein 52	1.99501	-1.0182	-0.634836	-0.393998	1.40987	0.843853	2.54845	-0.29082	-1.50665	0.569469	0.288117	-1.98279	-0.361215	-0.277553	-1.38254	-0.217293	0.485705	-0.324731	1.30982	0.296973	1.83745	0.37414	-0.0450325	-0.316343	-0.261694	0.0953944	0.935652	-3.24789	-0.26262	-2.46031	-2.7558	0.174727	0.618078	0.694208	0.563786	0.192627	-1.4986	-1.28049	-3.12766	-0.595299	-0.645051	-1.2354	-1.97419	0.972528	0.972528	2.59179	2.46758
790	E2ASQ5	Uncharacterized protein	5.70844	1.97808	2.99266	8.4165	6.38001	5.35538	4.53416	6.71464	6.1679	3.88103	4.21761	4.96922	7.20302	4.67973	4.5107	4.86151	2.49659	4.16977	5.11486	2.80186	4.29484	6.88311	3.75089	7.62188	3.2586	3.48798	2.15047	0.718254	5.93335	2.75957	3.48258	1.97974	1.28634	3.61203	4.90079	1.86944	3.91802	1.42522	7.23832	4.0527	4.0359	3.76794	4.74948	1.26072	1.26072	2.39681	2.4671
1039	E2A8P0	Deoxyribonuclease-2-alpha	6.5585	7.28124	7.19816	6.97513	6.28771	6.62539	6.73311	4.50004	6.69937	7.50592	6.74108	3.1308	7.19051	7.14707	6.56848	7.93016	6.08141	7.10805	5.78813	6.32072	6.98832	7.37641	7.86987	6.68151	7.77325	6.76095	8.34848	5.65769	8.96901	8.56171	7.27657	8.15694	8.41321	7.82235	8.79249	7.32848	7.51101	6.94935	3.35882	8.96835	8.1613	7.9164	8.15424	-0.94308	0.94308	-2.62225	-2.46468
226	E2A2D8	Beta-mannosidase	-0.94893	-0.536857	0.622676	-1.43183	-1.80284	-2.69059	-3.83331	0.981771	0.426877	-1.32576	-3.7029	-0.188106	-1.84353	-0.791482	0.278893	1.28189	0.528323	-3.61223	0.277573	-2.8795	-4.16607	-0.00713197	0.501668	-0.148076	1.12358	0.514319	-1.97584	1.72426	-1.40091	-1.14676	-0.929504	-0.672747	0.619933	-0.698771	-1.1431	-2.20586	1.27904	0.635688	4.67346	-0.0724861	0.862808	1.47263	0.0819958	-1.21061	1.21061	-2.41549	-2.46455
615	E2AJL8	Carboxylic ester hydrolase	5.47402	6.2406	6.41269	-3.85275	4.46988	4.06948	5.74905	5.83776	5.17143	5.65692	4.85202	2.83627	4.34529	5.53053	5.35118	4.62678	3.17176	6.75679	4.53679	5.63595	5.89892	6.30572	8.06908	3.37664	6.16283	6.08122	6.5776	5.58719	7.73654	8.79784	4.98973	8.03863	8.27714	6.00206	7.09482	6.37798	3.95945	5.45654	5.28133	5.66467	7.74423	4.99432	7.3432	-1.3578	1.3578	-2.3305	-2.43862
941	E2B063	NA	-0.807039	0.0766716	1.31149	-2.13547	0.23158	-2.11593	-0.167854	-0.653007	-1.85378	-0.534202	1.0479	1.00332	-1.01662	-1.88739	-3.6975	-0.285324	-0.878374	-1.87143	0.612882	-0.21543	-0.213614	-2.18123	-0.299854	-0.138092	-0.616908	1.17175	1.42198	0.46916	-0.15485	2.9666	1.65136	1.47157	-0.282791	2.33887	-0.339017	-2.31184	-0.213758	0.776617	-1.76967	-0.266339	1.18123	0.378442	-2.02973	-1.00393	1.00393	-2.50529	-2.42965
578	E2AHW1	Isovaleryl-CoA dehydrogenase, mitochondrial	-0.322002	-0.624436	-2.36048	0.882535	-0.749665	1.68522	0.909447	1.29528	0.726321	0.627743	0.34225	-1.34908	-0.0150091	2.22723	0.878421	0.454958	1.58178	-0.474253	0.654634	0.560809	-0.0844617	0.0762565	0.61324	-0.103455	1.44626	0.163111	-0.67912	-1.0685	0.831824	-1.10169	-3.02822	0.389057	-0.415882	-0.360642	-0.0310639	0.231238	-1.73192	-1.97081	-3.98346	-2.66304	0.344593	-1.74054	2.29548	0.986523	0.986523	2.50852	2.42042
931	E2AZK6	Sulfatase domain-containing protein	0.876252	4.45092	2.04581	4.09107	-4.784	5.92896	1.86746	4.77587	1.00626	2.06931	4.32622	5.30482	4.7535	3.57109	0.34635	4.2309	4.02071	4.09765	1.96868	2.8659	3.43726	4.27587	3.46099	3.77568	1.01088	2.71209	0.374727	1.8851	0.46162	0.690323	0.710868	2.64347	-1.39689	1.7102	2.56332	2.85319	3.71332	0.551269	1.74308	1.36627	-0.139946	2.24251	3.80013	1.33591	1.33591	2.29367	2.39997
903	E2AYI3	Alpha-N-acetylglucosaminidase	-2.87167	-2.02161	-1.69411	-0.588798	0.478156	-1.67467	-0.173972	0.726683	-0.409731	-2.71553	-1.39168	0.681517	-1.20091	-0.521852	-1.08184	0.220538	-3.35673	-0.637715	-0.54102	-2.28562	-3.30441	-1.84199	-3.33038	-1.07243	-2.1957	1.48459	-1.23486	0.264661	0.382852	0.605145	-0.88562	-0.229921	-0.564973	-1.36974	-0.411538	4.25153	-2.16417	-1.76581	2.12018	0.569653	-0.833581	-1.19224	-0.502602	-1.047	1.047	-2.41991	-2.39282
285	E2A5P9	CN hydrolase domain-containing protein	-0.094018	-0.126604	0.378487	-1.38374	0.0194202	-0.637214	-1.71834	0.565474	0.975615	-0.544539	-1.25688	-3.17516	-0.895397	-0.706365	-1.13437	-0.423763	0.607647	-2.43263	-0.876657	-2.43816	-1.75001	-0.897444	-1.4676	2.26007	0.510921	0.0122037	1.14508	1.11198	-0.65585	-0.546028	-0.204264	-1.39571	0.923993	-0.55922	1.32226	-0.686997	-0.945949	0.623739	1.51795	-0.0514779	0.808907	-2.37776	-1.97054	-0.886176	0.886176	-2.57755	-2.38779
582	E2AI07	Transmembrane protein C2orf18	0.236413	-2.8964	1.18616	-0.544052	1.60295	0.9282	-0.102005	1.60583	0.757558	0.550302	-0.504417	-1.01947	0.468502	0.296127	-0.0561543	-0.139185	0.630063	-1.92918	1.71341	2.76068	0.242928	-0.0676677	1.2249	-1.79412	-1.19792	-0.520322	-1.10138	-0.264272	-2.01867	0.327566	-3.72899	-0.101296	-0.911808	-0.346299	0.612748	-0.218449	-0.864309	0.519636	0.626734	0.721028	-0.937799	0.67873	-1.65682	0.910779	0.910779	2.5244	2.37506
869	E2AWV7	Hepatocyte growth factor-regulated tyrosine kinase substrate	0.800534	-0.914723	-1.55305	-1.27307	2.26733	2.31323	2.05023	0.354254	0.734015	0.255451	-0.0958845	-1.73237	1.35119	-0.751696	-0.127603	-0.0104297	0.309975	0.0864205	0.827002	-1.23935	0.453873	1.30531	-0.288737	-0.653304	-0.449563	0.0999455	-0.262105	-2.63653	0.70228	-1.05722	-1.51108	-0.755816	1.38887	-2.44128	0.617228	-1.06763	-1.77923	-1.64117	-3.03627	0.836788	-0.0572013	-0.00734508	-0.060255	0.911236	0.911236	2.51965	2.37235
490	E2ADZ5	Calexcitin-2	1.65779	1.46908	1.06741	2.11966	1.1202	-0.383732	1.80787	-0.0952005	-2.12397	-0.190977	2.93058	1.24688	8.56673	0.656147	0.73254	-1.47592	-1.31303	2.61377	-0.479024	3.44607	0.524756	-2.00253	-1.27844	4.5283	2.59869	0.299428	-0.237703	7.73401	1.34393	-1.21266	7.68815	0.40805	0.273091	0.815089	6.91286	1.16378	6.25172	-1.2042	6.85966	-0.318995	1.08781	8.09532	1.6387	-1.83987	1.83987	-2.14883	-2.34316
1076	XP_011257946.1 uncharacterized protein LOC105252319 isoform X2 [Camponotus florida	NA	-1.34112	2.25521	2.30151	-3.22663	3.77057	-1.40583	-1.16718	1.4467	0.617739	1.89831	-3.68309	-2.03474	-0.750829	-0.140075	-2.33122	0.723453	0	-1.12356	-3.42484	2.23172	2.47554	1.59895	4.03165	0.0966294	3.2851	3.72565	1.58977	-1.66835	4.06047	3.58636	0.460941	4.31497	3.49309	0.655005	3.2679	2.64432	-1.23246	0.647908	-4.69004	-0.377216	3.08557	2.54465	3.74046	-1.54318	1.54318	-2.177	-2.3345
1027	E2A6B9	NA	0.00691737	-1.90918	-1.99865	1.94295	-0.131961	0.42911	-0.175181	-0.661658	2.03313	-0.644014	-0.549399	0.710863	1.47405	-0.508956	-2.98726	0.217936	-3.55232	0.255584	-0.0124901	1.14137	-1.58358	-0.858683	-2.1096	-0.137969	0.0542184	-0.2983	0.649551	1.14856	-1.1126	-1.34641	0.566336	0.497084	1.80323	1.11523	0.719291	1.31715	0.812778	1.27928	1.96864	0.42555	-0.610702	1.6647	-0.215589	-0.926785	0.926785	-2.44374	-2.33387
313	E2A6W8	Folate gamma-glutamyl hydrolase	2.5204	-1.80441	-0.579648	1.36901	1.3113	-2.36194	-1.25287	1.54012	-1.46055	-0.391401	0.530746	2.64094	4.24308	-0.215053	1.42598	-1.40707	-2.4979	2.1719	-1.51842	0.2703	-0.820941	2.15946	-0.394298	1.40452	0.545235	2.33033	-1.39814	3.1176	-0.574214	-1.15939	1.32219	1.57064	0.34368	2.09671	1.47036	1.76108	2.95168	2.62235	5.45602	1.7087	0.423063	2.42279	-0.177686	-1.17367	1.17367	-2.22795	-2.29389
254	E2A452	Acetyl-CoA acetyltransferase, cytosolic	1.5141	-0.368723	-0.429185	2.52399	-2.10267	-1.65364	-0.351837	-1.11728	-0.0668435	-0.590039	-2.47478	-0.981325	-2.10433	-0.791942	-2.51404	-1.47411	0.943555	-2.1164	-1.65599	-1.06952	0.777143	-1.02729	0.0252594	0.053237	1.15048	-0.19662	-0.217802	1.36328	-0.540219	-0.105182	-0.795737	0.157696	1.17343	-0.318793	0.16829	-0.491153	-1.6379	-1.48466	0.605395	1.58765	-0.10956	0.705886	0.961391	-0.84519	0.84519	-2.46233	-2.27983
680	E2AMG4	Glutathione S-transferase 1-1	3.30862	0.338583	0.994531	1.1941	-0.622818	0.274721	-1.76589	-1.38705	-0.673787	-0.014623	0.495122	-2.46001	1.38548	-2.89274	-1.12343	0.860509	0.616492	0.267024	0.122132	1.86372	0.281065	1.14728	2.40077	1.29008	-1.8611	2.27617	-0.00605353	2.82829	3.15736	1.40369	1.13901	2.66974	-0.763995	2.1356	1.32147	0.0366514	3.6119	-1.02245	5.87343	-1.26314	0.285896	1.01796	2.64883	-1.13854	1.13854	-2.21176	-2.26788
975	E2B242	Protein slit	-1.32883	-0.951919	0.335128	-1.90465	1.26631	0.70788	1.74085	-0.00191765	1.05386	-0.633171	-1.17037	-1.45466	2.74242	-0.867124	0.597047	-1.3708	1.30968	0.857274	0.320282	-1.38958	0.559984	0.391613	-0.737312	0.0619603	-0.384827	0.861605	-1.10212	-0.914489	0.0342054	-0.711053	1.15544	0.169512	-3.24304	-3.0158	-0.719495	0.103049	-1.51524	1.47736	-2.70438	-0.595408	-1.96175	-2.90346	-2.93766	0.945411	0.945411	2.32054	2.26035
1144	XP_011266004.2 venom serine carboxypeptidase-like [Camponotus floridanus]	NA	4.80966	2.33941	2.3661	-0.136513	4.02586	-0.595099	3.30079	-1.63608	7.17098	6.17913	6.33467	2.93269	8.39815	4.92161	0.382583	6.37553	2.02902	6.80052	3.15458	6.77	2.27985	3.00463	5.52753	9.19814	4.66626	8.88684	3.70165	5.84764	8.67171	-1.62513	-0.281387	6.03782	7.31156	6.53634	8.24752	5.90675	8.01851	6.98378	4.14921	1.26381	5.66983	5.3027	6.71995	-1.78956	1.78956	-2.07043	-2.25924
265	E2A4L3	ATP-binding cassette sub-family A member 3	0.0609443	0.519222	0.538221	0.174443	-1.23198	0.344194	-1.71419	-0.232274	0.906867	2.63896	-0.183322	-0.0671031	-0.290482	-2.12474	-0.427189	1.02787	-0.974165	-1.2547	-0.883356	1.62861	-0.0587677	0.228682	-0.064569	0.231243	-3.66596	-0.843825	0.555578	-3.45587	0.239684	1.47374	0.056497	1.55809	-1.47259	-0.661323	-1.10596	-3.30235	1.53188	-2.6942	-3.73914	0.217754	-1.42137	-3.89923	-1.23845	1.01923	1.01923	2.25444	2.25193
1324	XP_025269121.1 guanine deaminase [Camponotus floridanus]	NA	-0.0873329	-2.61673	0.575632	1.72984	0.413494	0.133039	-0.221097	-0.503987	0.30893	-1.563	1.90227	-0.554664	0.733183	-1.81308	-0.0193651	-1.38886	0.27427	-3.14725	0.0808753	-0.569356	0.856208	-1.23758	-1.88123	0.824913	-2.21735	-2.77342	1.03364	3.56569	2.42869	-0.0821526	4.77347	-0.5225	0.606247	-1.18251	1.67926	1.19329	3.00855	0.49076	-2.53115	1.19498	0.346986	4.04599	-0.615128	-1.13714	1.13714	-2.17241	-2.23421
300	E2A6C9	Protein G12	4.42042	-0.665899	0.296775	1.2297	4.30973	-3.55067	0.987391	-0.297591	0.962052	0.0508416	-0.595546	6.92018	4.25496	-0.508441	1.49006	-1.36635	-2.19028	4.35296	-0.110418	0.50518	2.44453	1.41487	0.378799	4.47812	3.45821	1.79192	3.21459	10.6419	2.81657	0.709864	9.59526	0.139833	-0.918212	-0.380738	0.608164	-0.305037	10.3971	1.45778	0.671833	-0.938363	1.7243	6.46058	4.04797	-1.90822	1.90822	-2.03307	-2.23085
823	E2AUK4	60S ribosomal protein L22	2.57966	-0.565281	0.0656805	0.458101	1.21768	-0.165754	-0.351699	-0.169332	-0.489289	0.792502	-0.596708	-0.250435	0.840449	1.50559	-0.555125	0.111943	-1.73473	0.665289	-0.316259	0.190565	0.969541	1.87057	-1.92343	-0.385501	-2.24674	-1.49985	-1.63658	-2.12418	-0.220976	0.186353	1.26937	-1.10954	-2.42133	-0.636973	1.12055	-1.41354	-0.175091	-0.602152	0.765713	-0.178375	-1.73554	1.28912	-0.964915	0.816424	0.816424	2.41757	2.22617
1130	XP_011264740.1 transferrin [Camponotus floridanus]	NA	2.43106	2.72914	4.24322	6.11098	2.01662	-2.51355	2.52556	1.76389	-0.00952145	2.19898	4.78918	8.13878	3.35964	0.0914811	5.3945	1.71472	-1.26361	1.78412	2.54218	2.14233	1.34446	1.59673	1.47133	4.53889	-0.823351	0.913005	-2.38383	1.34145	3.34791	-0.904643	-0.512301	-0.30996	1.62338	-2.01676	1.24443	-0.992721	2.76447	-0.810491	6.44512	1.09655	0.262689	1.9264	1.89	1.442	1.442	2.07954	2.22477
907	E2AYP1	Muscle M-line assembly protein unc-89	-3.95834	-2.50376	-3.25091	-1.24668	-0.0636716	-5.40295	-5.46773	-5.39824	-0.594614	-3.36423	-5.29419	-3.92104	0.209852	-2.58313	-3.16386	2.10047	0.687415	-3.59679	-1.90358	-2.86959	-3.36453	-0.817104	-2.54981	-1.72034	-3.83153	-1.14343	-0.468548	-1.10877	-0.128373	-3.23306	-4.50033	-3.26838	1.41665	0.766001	-2.77787	0.977642	-2.3808	1.69276	-1.49531	0.724062	-2.08885	-1.40291	-1.56142	-1.25888	1.25888	-2.11811	-2.22279
86	XP_011253033.2 nascent polypeptide-associated comp	NA	1.54398	2.20566	-0.426379	-0.197843	-0.234336	1.62777	-1.45963	-1.74815	1.08796	-1.7832	0.589906	-2.59874	2.63502	-0.37375	-0.274293	-1.35814	-0.849018	1.01144	1.49166	0.320254	1.05088	0.659905	0.358088	0.395508	0.743304	1.33127	-0.456861	3.30974	0.638014	-0.980961	2.07483	-0.585908	-0.159964	1.77539	2.3473	1.57238	2.44721	0.659736	0.470253	1.16828	-0.506105	3.23982	1.81973	-0.922581	0.922581	-2.28812	-2.22269
1153	E2AZU0	Ferritin domain-containing protein	2.16144	1.06309	3.1615	1.8623	0.141213	-1.83619	0.778613	-0.30263	-2.265	-0.388229	0.68932	7.92731	1.0719	0.193226	0.63617	0.280873	0.0853349	-2.04633	-0.111556	0.0668519	-0.998567	-0.0610249	0.0709791	3.88712	2.48286	0.922543	0.388627	6.37505	3.45611	0.315989	1.55916	-0.215593	0.542057	0.260365	-0.0690724	1.11251	5.04552	2.54366	4.03623	-1.17298	-0.536379	4.85228	1.35642	-1.32753	1.32753	-2.08551	-2.20884
874	E2AX18	Glutathione S-transferase	-0.236809	4.18974	4.73557	5.34722	3.38381	5.10815	3.53662	5.54595	3.24647	2.07643	2.9968	1.66364	-1.37452	5.03988	4.43422	3.14778	3.08341	2.91761	4.78246	3.01524	4.70249	4.24401	1.93337	0.604521	2.63764	3.20328	2.65704	1.35216	4.38396	2.75876	6.01991	2.59812	2.83872	-1.55094	3.10841	-2.14085	2.75546	3.99057	2.15525	-1.36297	4.78133	2.0099	0.122798	1.22426	1.22426	2.08454	2.18381
1174	XP_011268594.2 beta-galactosidase [Camponotus floridanus]	NA	3.78802	2.41277	0.410876	-0.42292	-2.5913	0.887608	0.167717	-0.359464	-2.7112	3.58136	6.5882	8.14026	5.41928	-1.54553	1.64227	2.20916	1.16394	3.68129	3.74337	5.7834	1.04666	-1.32627	1.87548	4.97908	2.27872	5.26059	2.06657	6.49945	5.18643	1.66494	3.47056	1.84101	4.12668	-0.400308	3.96938	3.05086	6.71571	3.52195	5.04521	1.7129	1.07177	4.08752	2.11779	-1.51834	1.51834	-2.01011	-2.16911
945	E2B0H9	Ribosomal_S13_N domain-containing protein	2.74798	2.28492	-1.38867	2.21924	1.93485	-0.403611	0.469432	-0.332731	-0.274507	0.857181	-1.12565	-0.387772	1.5648	0.52226	0.742333	-0.971569	0.876871	0.14845	0.383924	0.088925	0.706379	-0.778697	-1.12855	0.421776	-2.66844	-0.573052	-0.505391	-0.183685	0.928694	0.34725	0.548436	-0.0860975	0.248796	0.0724563	0.185259	-1.61544	0.431203	-2.03325	-0.518469	-0.55004	-0.903749	0.471257	-2.29679	0.79465	0.79465	2.35367	2.16715
436	E2ABW9	ATP synthase subunit beta	4.39996	0.84864	1.56733	3.6895	-0.315407	1.22287	2.57128	1.27158	-1.83246	-2.69252	1.95836	0.154345	2.48175	0.36682	-2.21122	2.54706	-3.53571	-0.660009	-1.16651	3.05775	1.91217	-1.96651	2.11911	4.15575	1.14891	1.3709	-0.182552	3.58182	2.8889	-0.148162	2.11702	0.135613	1.68905	-1.81006	4.42815	-1.23639	3.19908	3.40645	3.2914	0.897176	3.06277	4.65793	2.62191	-1.27734	1.27734	-2.04752	-2.16298
886	E2AXP3	Leucine-rich PPR motif-containing protein, mitochondrial	-0.131853	-5.10545	0.507	-1.53157	2.08388	-0.468426	-0.254892	-1.50859	0.566766	-0.254157	-2.64617	-2.20812	-1.67601	-0.226553	1.14014	1.07021	-1.87509	0.019346	-0.695281	-3.52881	-2.20117	-0.0397827	-0.543158	0.0708436	-2.10208	-1.87726	-2.63948	-2.98502	-1.91956	-2.3892	1.73728	-2.746	-3.54273	0.34724	-2.61237	-3.09802	-2.96807	-0.538493	-5.77717	2.35286	-3.06855	-3.71697	-2.05835	1.12839	1.12839	2.08535	2.15692
609	E2AJ79	GH16 domain-containing protein	-0.182709	0.873552	-0.725701	-3.13574	-0.45873	3.18567	0.543082	3.54592	-0.505389	-0.175286	0.420993	2.69505	-1.77985	0.0235521	-2.67333	-0.787511	-0.709836	-0.021532	1.02555	2.0815	1.44589	1.21993	-0.438034	-1.33268	-0.573991	-1.6862	0.254216	-1.66012	-1.76846	0.959599	1.19475	0.723733	-0.525335	-0.262837	-0.285975	-1.29113	-1.05317	-1.0186	-3.23616	0.87167	-3.29023	-1.26862	0.353694	0.98249	0.98249	2.1439	2.14793
549	E2AGG0	Phospholipase B1, membrane-associated	3.91084	3.54122	5.39805	8.16283	4.83329	6.2292	3.83564	5.22726	3.83856	2.52961	3.34795	2.78587	3.73418	3.33634	5.41289	4.42157	2.18272	0.914382	4.54154	2.25338	4.45926	6.54817	5.6646	4.28035	4.58795	-0.317552	2.64041	3.21331	2.77824	3.02779	3.33266	2.75951	3.86562	1.05022	3.96991	1.68602	5.72546	4.49433	1.70499	0.2287	4.36262	3.27609	6.45238	1.06619	1.06619	2.09924	2.14721
112	E1ZXF0	Innexin	-0.923551	-1.48808	1.90508	-0.138551	0.970953	1.99775	0.437391	-0.0851299	0.713733	-0.119862	0.421777	-0.947813	0.833784	-0.687585	-2.2897	-1.72115	1.39746	-0.677439	-0.00657046	-1.71247	1.52009	-0.847339	0.468618	0.304682	-0.292608	1.0066	0.400532	-1.68231	1.71315	-1.18329	-3.39836	-1.16738	-0.86253	-0.822735	-0.0319246	-0.489557	-1.09954	-0.550494	-3.68012	-1.22317	-2.92727	-1.40857	-0.714606	0.862927	0.862927	2.22994	2.14198
1286	E2AD21	Rap-GAP domain-containing protein	2.03723	2.78301	-2.50853	-0.997158	-1.38357	0.962212	0.356907	0.397617	-1.15448	2.3421	2.88999	-1.48973	2.58385	-0.220926	-2.93073	3.9516	0.180907	3.16296	-3.65575	0.50531	-0.521179	0.894549	3.13646	2.84506	2.8674	0.567674	-0.730985	0.725471	3.31006	1.07355	1.00133	0.905227	4.01822	0.423321	0.94012	0.0832153	4.06421	1.35008	0.626963	1.96551	3.38199	0.114198	3.45867	-1.15727	1.15727	-2.04798	-2.1331
938	E2AZU1	Ferritin	0.708971	-0.332971	-1.57129	2.76027	0.107606	-1.27064	0.244097	-1.07133	1.71112	-0.500279	1.47833	8.92202	-3.40502	-2.04212	0.361078	-1.06475	1.12519	0.441081	-1.67409	-2.45181	0.795414	0.339136	-0.497456	4.71343	0.952593	0.347709	-1.29762	6.16033	4.18607	1.69773	3.75176	-1.03399	2.09294	-0.849266	-1.33425	-0.038171	5.27929	-2.17419	4.32319	-1.73768	2.27294	4.82799	0.948082	-1.51912	1.51912	-1.97068	-2.13053
794	E2AST1	Cytochrome c oxidase subunit	2.03472	0.211477	-1.28715	-1.15168	-0.923866	-0.355043	0.123996	0.640955	0.1604	0	-1.931	-1.2131	-0.256983	-0.480765	-0.917166	-2.10064	-0.186988	-1.60818	1.75445	-1.23053	-1.14949	0.0358323	0.917409	3.49969	-1.42731	1.38006	-0.878343	1.50013	-0.395791	1.27144	1.98574	0.570707	2.24477	0.871723	0.11601	0.0677261	0.750149	-0.645589	-2.15694	-0.593026	-0.51407	0.194709	0.744417	-0.816846	0.816846	-2.21781	-2.09984
1367	E2AAT8	ATP synthase subunit alpha, mitochondrial	2.74528	-1.24577	1.07134	1.92715	-2.12396	-0.376493	-0.221147	1.57342	-1.80714	-0.468509	-1.42588	0.672771	0.337969	2.80589	-2.62651	1.50556	-0.397452	-0.357339	-3.1871	-2.77308	1.18325	1.42229	1.03806	1.59782	-1.31339	0.264992	-1.12885	2.94605	3.71861	0.702293	1.24827	0.457757	-1.78948	-1.68127	0.803824	-0.105213	4.16502	3.0521	2.18872	0.000363494	-0.425531	3.83394	3.3853	-1.12769	1.12769	-2.01257	-2.09346
421	E2ABH3	OV-16 antigen	-1.22381	0.539021	-1.71928	-0.808753	0.0972735	2.43517	1.03918	2.11724	0.921909	-1.48101	0.909197	7.45554	-3.62584	-0.179504	-1.02631	1.26353	-0.068274	-0.770327	0.164634	-0.0957171	0.051324	0.757968	0.553431	-2.66293	0.785311	-0.705088	-0.5819	0.74108	0.595828	0.14694	0.0679305	0.239205	-0.0300428	-3.76453	-0.0645341	-1.37093	-2.22015	-0.898313	-2.09033	0.0787041	0.610572	-1.23525	-2.83402	1.0773	1.0773	2.01421	2.07925
899	E2AYB0	Vigilin	-2.34966	-2.85321	-0.575118	-2.8269	0.575318	-0.208737	-0.353271	0.0924314	-1.69549	-2.07016	-0.260231	-3.17703	-0.981706	0.000945842	-1.24343	-0.375551	-3.00367	-0.79379	-0.580408	0.6237	-2.3305	-0.246171	-2.16459	0.995272	0.789476	2.17505	0.540968	-4.82259	0.85571	2.08958	-0.986205	0.260951	-0.617763	0.551062	-0.456299	-0.841801	-1.40835	0.172392	-3.1468	0.746071	0.572932	-3.31999	1.74627	-0.959894	0.959894	-2.0575	-2.06931
1238	XP_011251429.2 venom acid phosphatase Acph-1-like [Camponotus floridanus]	NA	-0.668758	1.04195	0.488206	1.808	0.806219	1.34122	0.942897	-0.858764	3.64953	2.30769	2.68847	-2.52911	-0.537833	1.15475	-1.88166	3.16455	0.349532	3.191	1.87158	0.668802	1.63418	3.69832	1.03916	-0.660508	0.833931	4.27702	1.96653	-0.994966	1.1492	1.89212	-1.0075	-0.480654	-1.48235	0.0502001	0.775323	0.275521	-3.04855	-0.898318	-2.47201	0.25984	0.177187	-0.746502	1.68097	1.02572	1.02572	2.01956	2.06571
484	E2ADN8	Carrier domain-containing protein	-1.01725	-3.67316	-2.94178	-5.04942	-5.13689	-2.6264	1.99423	-3.48568	-3.85639	-6.54824	-0.0425148	-4.77452	-1.67597	-3.6091	0.466217	-2.54268	-3.19753	1.02076	0.366992	-3.3495	-5.06193	0.249472	-1.78502	-2.77267	-0.0517231	0.785595	-2.85209	-3.49565	-2.74267	-2.37217	-0.14904	-0.326573	-0.530041	0.974398	-1.36874	2.07182	-2.34193	-0.565476	-2.25877	-0.0193639	-0.629371	-3.59269	-2.73303	-1.19829	1.19829	-1.95492	-2.06033
279	E2A5A3	CHK domain-containing protein	0.744186	0.510551	-3.32495	-0.773647	2.03776	0.279725	0.761753	0.407023	0.577808	0.511865	-0.959409	0.375475	-0.419133	-1.36428	2.41863	-0.533346	-0.318959	0.691256	-1.01194	-1.35133	0.600523	2.11563	0.246645	-1.30793	-0.169077	0.337943	-2.31591	-0.954728	-1.46761	-0.37106	-2.31253	1.13834	0.0581887	-1.33215	-0.549619	0.528341	0.472714	-1.77022	0.126596	-0.251646	-1.69883	-0.637132	-0.970072	0.768921	0.768921	2.2029	2.0509
408	E2AAS7	S4 RNA-binding domain-containing protein	4.35815	4.14303	3.61778	4.78003	2.95432	0.289013	2.93658	0.250429	1.19003	0.296492	0.620836	1.77318	4.16018	-0.782584	3.52809	1.64104	-1.43018	1.09925	-1.82251	1.74966	4.00526	1.07855	2.94371	2.78911	-2.50825	0.700209	0.0266709	2.35553	0.205161	-0.41476	2.56634	-0.868385	-1.04589	1.79595	-0.76646	1.82917	3.32573	-1.07267	1.17694	-2.34716	3.97367	3.01331	0.159627	1.14141	1.14141	1.95048	2.0423
934	E2AZS6	Tumor susceptibility gene 101 protein	0.864926	-0.95352	-1.45681	-1.21562	0.807904	1.09266	-0.631429	0.109175	0.476096	1.4466	-2.77456	-0.306344	-3.00759	-0.795494	0.216797	0.499565	-0.334517	-0.678699	-0.621884	-0.112837	-2.13828	0.223436	-1.08334	-0.47057	-0.414808	-1.73722	-3.02079	-1.58465	0.49256	-1.48609	-3.04458	-0.619046	-2.01142	-1.60906	-2.20923	0.807131	0.367005	-1.61413	0.271479	-0.572405	-1.24486	-1.78276	-3.0603	0.776154	0.776154	2.16977	2.03595
135	E1ZYH3	Calcium load-activated calcium channel	-1.41712	0.949956	-2.23835	-0.468296	1.58488	1.79704	-0.319602	-1.90593	-0.496276	-0.726663	-1.53498	-3.46683	0.105407	-0.622564	0.512134	-1.72864	1.84418	-3.32489	-1.84357	0.828932	0.907898	0.383201	-1.60653	1.31761	-0.105453	0.670567	0.131898	1.08308	-0.723863	0.244826	0.147708	1.23689	-0.289974	0.682494	-0.740444	0.511943	3.67397	0.133854	-0.972425	0.978605	-3.51398	1.30345	1.29382	-0.909169	0.909169	-2.04221	-2.03285
580	E2AHZ9	Aamy domain-containing protein	-0.983374	-1.36915	-1.8744	-1.95844	1.5592	0.231829	-2.85575	-0.832902	-1.9503	-0.808418	-0.377367	0.357985	-1.32252	0.793338	0.285442	-0.422392	-1.74774	-0.197267	-0.247241	-0.858631	-0.0191708	1.15272	-2.47804	-0.0187996	0.345242	1.2179	-0.290842	1.27899	-2.59859	2.70288	-1.20385	0.285129	-0.915278	-0.717424	1.55603	0.37894	-1.59856	1.83158	-0.69264	-0.467366	0.545457	1.55277	-1.01364	-0.801182	0.801182	-2.1281	-2.02808
802	E2ATC5	Organic solute transporter alpha-like protein C01B12.4	-0.710304	-1.84934	1.02503	0.296424	-1.86289	-1.54232	-0.617407	-0.00932824	-0.258018	-0.311924	0.385279	-0.552699	-2.1393	-1.80104	1.89784	-0.438875	-0.550885	-3.19858	-0.514036	-0.0898356	-0.907299	-0.304436	-0.187421	-0.988262	0.2585	2.7465	-0.28695	-1.96327	0.773552	-1.77021	-0.374731	1.3977	0.840363	-0.963842	-0.142369	0.95361	1.39395	1.30395	-0.558241	0.143283	0.473494	0.719333	-1.1971	-0.757152	0.757152	-2.17505	-2.02319
290	E2A5W5	NA	-1.30926	-1.55358	-0.6422	-1.41413	-0.163024	-0.749789	-0.00125962	-1.44136	1.43583	0.678474	-1.50532	-1.44261	1.36783	-2.73629	-2.0322	-2.7959	-1.63498	-0.525049	-1.21764	-0.362517	0.558263	0.0470014	0.590762	0.455534	1.17685	0.383868	-0.459415	-2.98347	0.0193529	-0.890168	1.04049	-0.0652877	-0.352034	2.29901	0.56293	1.81928	-1.94506	0.219246	-1.50466	1.20516	-0.176509	-0.87736	1.41021	-0.799461	0.799461	-2.1216	-2.02242
108	E1ZX95	WD_REPEATS_REGION domain-containing protein	1.31683	0.563018	-0.0811319	1.01233	-0.391831	-0.407346	-0.29495	-0.396151	-1.16413	-0.610683	0.662203	-4.06046	-0.878845	-1.99125	-0.542841	1.29661	0.727987	-3.20647	2.7675	3.08482	1.28557	-0.142959	1.03081	-0.280264	-1.40346	-0.675265	-0.665008	-0.00498421	-2.43017	-0.41727	-0.904185	0.951418	-0.267085	0.549068	-2.46024	-0.766237	-0.698399	-3.22332	-2.67179	-0.805966	-1.19538	-0.860461	0.287885	0.878734	0.878734	2.02843	2.00632
334	E2A7Y2	Transgelin	-2.87297	-0.583288	-4.45015	0.812212	-0.790786	-1.11251	0.113683	-1.11766	0.126285	-1.33286	-0.0915664	-3.29785	0.462715	-0.016436	-0.137168	-0.629069	-1.17385	1.59274	1.13847	-2.13178	-1.66527	0.390923	-0.568364	0.994703	0.976256	-0.235998	0.670134	1.92716	-1.22576	0.406758	2.40025	-1.19843	0.176336	-1.22637	0.0847841	-0.117168	-0.129008	0.174978	-1.29817	0.245199	0.660642	-2.63837	0.963004	-0.834223	0.834223	-2.059	-2.00268
608	E2AJ75	Pyruvate kinase	0.930739	1.26913	0.53546	1.16396	-0.665603	-1.75707	-1.52127	-0.689359	0.994902	-1.22696	-0.181898	1.17391	1.18845	-0.38639	1.26334	-1.24345	-3.49335	0.264515	-4.10303	-0.201725	1.80198	-0.847197	0.037157	-0.437984	0.195091	0.255281	0.828514	3.77888	-0.179737	0.735677	0.939277	1.17106	0.777583	-0.0049099	-0.772963	0.485731	0.274096	0.127405	1.18417	1.24648	1.58974	0.252187	-1.02136	-0.818766	0.818766	-2.04313	-1.98147
697	XP_011261147.1 serine/threonine	NA	-0.326015	-1.53546	-1.97678	0.221337	-0.198217	0.883145	0.434586	1.46471	0.872522	1.82681	1.66943	-3.08035	-0.155509	0.719751	-1.91666	0.915885	-0.173391	0.902715	-1.65948	1.14397	-1.86351	-0.201203	2.82665	1.63203	1.17964	2.26607	1.7244	-0.924229	0.816783	-2.37601	-0.28392	2.44946	3.08678	2.23207	2.16159	1.68395	0.792996	1.77593	-3.30053	-1.41626	2.41598	2.41291	1.44345	-0.954093	0.954093	-1.9436	-1.97516
976	E2B249	T-complex protein 1 subunit eta	-3.07127	-3.69431	-0.215805	-2.47578	-1.44274	-0.160771	-0.0860327	-1.2445	1.64444	-0.1349	-0.769503	0.635933	-1.162	-1.69912	0.818841	-1.9882	-2.2461	-0.181817	1.66565	-0.692025	-4.62869	0.385181	-0.646787	0.538607	3.31305	-1.08747	1.79008	-1.65773	1.55096	-1.6222	1.28526	0.560313	2.54896	-1.15211	1.56227	-0.676762	-1.05288	1.60577	-3.8998	-0.285226	-0.614414	-1.56312	-0.0981936	-0.982282	0.982282	-1.92834	-1.97348
752	E2ARB2	Titin	-2.94143	-3.97496	-7.79562	-2.31468	-4.79808	1.16331	-1.54368	-4.62116	-5.14182	0.717982	-4.55434	-4.47082	-1.43224	-3.56468	-4.51063	1.28895	0.260421	-4.99165	0.84235	-5.12408	-5.33728	-6.44891	-2.62051	-4.39274	2.58551	-2.32737	0.327729	-4.63332	-5.60733	1.68146	-4.51395	1.00567	-1.05671	0.250811	-1.70352	-5.70694	-3.92212	1.22953	-4.21061	-1.46462	0.92885	-2.56127	0.662995	-1.45528	1.45528	-1.81742	-1.97134
248	E2A3S4	10-formyltetrahydrofolate dehydrogenase	1.51788	-2.17664	1.33111	-0.848417	-2.47	1.21775	-1.63978	-0.275019	-2.94908	-1.3496	-0.703263	-0.762642	-0.578255	0.955655	-0.857668	1.61095	0.46433	-0.0778542	-2.59975	2.21169	-3.18744	2.32495	-0.387863	-1.6882	-4.24608	-0.458922	-1.19186	0.074756	-0.853618	-1.45506	-3.15017	-0.292861	-4.29623	-1.07696	-0.435237	-0.729361	-0.374172	-0.787467	-2.92099	0.469	0.17208	-1.46239	-1.46709	0.907282	0.907282	1.94705	1.95773
232	E2A2U3	Dihydroxyacetone kinase	-1.74631	0.68257	0.791139	-0.272302	1.61527	0.7164	0.0612884	-1.5257	-0.0573271	2.85506	-0.350152	0.282245	-0.894847	0.818801	-0.24771	-0.231414	0.40091	-0.440722	-0.542751	-1.37389	0.366228	-0.440941	-0.951516	0.0623447	1.07905	-1.76646	0.235185	-3.07246	0.43648	0.671802	0.326913	-0.208134	-0.0741755	-0.839113	-0.939359	-1.29857	-1.48751	-0.915829	-3.2753	-1.059	-0.09778	-2.15834	-0.3516	0.715477	0.715477	2.11764	1.9503
1280	E2ABS8	Alpha-mann_mid domain-containing protein	4.096	0.273058	1.12174	-0.310822	0.590574	3.86261	-1.53512	0.221569	0.536445	0.482057	3.74061	6.30128	4.3188	-0.763162	-0.0785529	0.356781	-0.731775	-0.384718	-3.1643	2.36936	-0.195945	-4.61698	-1.6009	0.487367	1.05724	0.614558	0.0828767	7.14471	0.317331	1.14992	3.07063	-0.602236	3.3673	0.153635	2.87998	1.26901	5.97722	2.13518	7.84874	0.519385	-0.813042	4.16749	-0.159633	-1.38605	1.38605	-1.79047	-1.93643
817	E2AUC2	Neurocalcin-like protein	-0.445116	-1.33057	-1.97519	-2.59431	1.49324	1.23502	0.825086	-0.530581	2.13147	0.179775	0.966355	0.495508	-0.0838543	1.2792	0.238965	0.228542	-0.0351743	3.14999	-1.5265	1.80722	1.56437	0.976588	-3.0812	-1.72247	0.906759	0.976549	0.782912	-3.37947	-2.57346	0.836618	-1.58366	0.56043	-0.576214	-1.9814	-1.70872	-0.805292	-1.47459	0.545119	-0.937184	1.68111	0.905468	-2.45942	-1.44009	0.888386	0.888386	1.92938	1.935
503	E2AE89	60S ribosomal protein L21	-0.200284	-0.692301	0.220661	-1.2597	-0.0150137	-1.22626	-0.435663	-0.12192	-1.48341	1.85385	-0.741254	-3.57745	-0.276103	0.828899	0.804325	-0.778356	-1.30294	0.231758	-0.722022	-0.942524	-1.78745	-0.412724	-0.531795	-2.19063	0.583352	2.17932	-0.559757	0.804755	-1.6368	1.49038	1.3725	-0.410042	-1.03122	1.38684	-0.303931	-1.1906	1.18905	1.20769	0.423091	0.778289	-0.51749	0.397064	-0.628401	-0.713593	0.713593	-2.0922	-1.93303
1021	E2A4T7	Aa_trans domain-containing protein	-0.65192	3.5074	0.23	-0.440952	0.268918	-0.879484	-0.881726	0.0963451	0.15144	-1.67161	2.83167	2.96625	3.05243	0.442876	-0.963276	2.64891	1.31327	1.82579	-0.840991	-0.537638	0.228208	-3.19599	5.00819	2.36857	0.659005	-1.35141	1.77115	1.94732	1.6989	2.64951	1.17878	-1.51175	-0.0898878	3.35924	2.25149	-1.16804	2.99783	3.09192	5.44582	0.891344	1.01179	3.75553	2.80262	-1.0572	1.0572	-1.83836	-1.91992
62	E1ZUV1	NA	-1.45934	0.367482	-1.67403	1.97409	-2.51723	-0.446791	-1.86998	-0.0173918	0.799357	0.633143	-0.022396	-0.999259	0.62104	-0.121622	-2.14276	0.0571281	-0.870427	-0.571816	-0.328922	-0.705027	0.186231	-1.0746	1.61668	-0.372002	1.54409	1.11392	-0.883601	2.94768	0.547892	-1.15172	-0.00402137	0.247237	-1.41395	-1.38889	0.121123	0.575454	2.1558	-1.11435	2.92223	-0.0311885	0.846784	1.1745	-0.338353	-0.747386	0.747386	-1.99824	-1.90066
345	E2A8M5	Amino_oxidase domain-containing protein	1.00846	-1.93275	1.93538	-2.76176	-0.426582	-0.668158	0.711249	-0.932471	0.490901	-0.105155	-0.0553522	3.31214	0.30383	1.07589	0.85335	0.954267	0.460056	-0.0639888	-2.32858	-0.534525	3.15224	0.255683	0.956446	-1.75485	1.14795	1.9185	1.70809	1.36879	0.747859	0.427783	-0.91453	0.847033	1.79812	1.88196	0.586842	1.59075	0.283819	0.32835	1.87969	2.6853	1.49746	1.02943	1.31991	-0.7728	0.7728	-1.96675	-1.89723
773	E2ARX6	Voltage-dependent anion-selective channel	8.55844	7.70702	3.28171	7.31555	3.50494	0.604255	3.44582	1.76752	2.27563	4.9218	5.58058	4.64722	8.91539	4.16627	3.64402	4.35336	0.91818	6.86606	2.63557	6.83625	6.4101	2.93517	6.02753	7.25001	5.77761	2.6682	6.11628	7.00902	7.44463	3.90248	5.9295	5.77416	4.36628	2.55379	7.67844	7.54431	5.96494	7.49352	4.3643	2.77169	7.18037	7.70649	6.78455	-1.14801	1.14801	-1.7805	-1.88882
1043	XP_011253905.2 salivary glue protein Sgs-3-like [Camponotus floridanus]	NA	3.41669	3.52185	1.0345	2.19952	3.96163	-0.523199	5.60401	1.75115	2.91756	-1.02628	4.99615	7.88301	7.91579	0.318784	2.17255	5.03042	-0.15284	2.12118	-1.42249	2.38117	0.914069	-0.089172	7.19485	6.17571	1.27603	-1.13843	1.26523	3.58841	5.52644	4.42472	2.85221	3.67372	3.81972	5.07283	5.39544	2.44082	4.87109	3.90645	8.25761	3.04025	3.72143	6.76567	5.59015	-1.32537	1.32537	-1.74617	-1.88514
460	E2ACU8	Alpha-actinin, sarcomeric	-2.15661	0.442954	-3.67792	-0.164566	-0.44709	-1.10221	-2.38437	-1.50976	-1.04754	-0.582105	1.2709	-0.499641	-2.8401	-0.753594	1.49097	-1.39029	-0.123742	0.920249	-1.99439	0.725198	-1.54088	1.02527	1.02696	-2.5609	0.0791875	0.288249	-4.66294	-0.662504	-2.46054	-0.50106	-3.28655	-1.62236	-0.390867	0.850382	0.878151	-3.70845	-1.88461	0.388529	-2.98952	-1.94935	-2.73225	-1.7724	-1.78802	0.858639	0.858639	1.88239	1.884
461	E2ACX9	Laminin subunit beta-1	-1.31704	-2.75619	-4.73854	-1.80183	-0.727474	-3.74266	-1.41493	1.23605	-0.886182	0.673825	-0.507366	1.43937	1.42996	1.19732	-0.836288	-3.32048	0.0671501	-1.01897	2.21406	0.185806	-3.46149	1.31778	0.013666	-1.02849	0.0827238	-4.05338	-1.79333	-2.39841	-1.06783	-1.09121	-2.58331	0.669345	-1.30342	-3.07169	-1.81173	-3.68481	-0.796444	-0.411107	-2.95129	-0.978678	-2.05366	-0.771253	-1.79761	0.916325	0.916325	1.84933	1.88277
699	XP_025264079.1 alpha,alpha-trehalose-phosphate	NA	-0.345799	0.646404	-1.45532	-1.15861	-0.741105	-2.91841	0.543448	0.87003	-2.02332	0.311033	-0.802776	1.21848	-1.62346	-1.95684	1.49922	-0.67181	-0.110536	-2.39022	1.22733	-2.30515	0.087866	0.981249	-1.24725	-0.243153	1.06829	-0.383399	0.836948	2.99581	0.47422	-0.150157	0.851178	1.26649	1.93663	-1.0508	-0.256884	-2.64366	-1.6296	1.31545	4.49753	-1.71682	1.29238	0.222673	-2.02536	-0.870521	0.870521	-1.87346	-1.8826
387	E2AA51	Argininosuccinate synthase	-1.7219	0.405388	0.328447	0.172056	-1.46153	0.878512	-1.0131	0.00573944	0.974066	1.52151	-1.00834	-0.250315	0.127329	0.238253	-0.852169	-0.0283674	1.46791	-0.449969	1.03358	0.357491	-1.66855	-2.64663	0.440463	-0.982017	-0.976417	-1.67754	0.120967	-3.31026	1.42655	-0.321624	1.02023	-2.52483	-1.91802	-0.678761	-1.96065	-2.70222	-1.00342	-1.48087	0.908386	-0.370902	0.958443	-2.74705	0.52086	0.747995	0.747995	1.97006	1.8821
176	E2A0E1	Bac_surface_Ag domain-containing protein	-1.45073	0.425512	-0.0465968	-3.00585	1.81706	-0.00960949	-1.81369	-0.849275	0.344172	0.857518	1.09311	-1.0024	1.3954	1.5773	0.125264	0.311445	2.23969	1.49732	-0.568655	-0.624541	2.05772	2.36454	-2.74666	-0.0798633	-2.62188	-0.228172	1.14783	-3.0477	-0.582563	1.17665	-0.15376	-0.414884	0.808889	1.21046	-0.889466	-1.87402	-2.06057	0.32896	-2.23085	-0.116353	-1.40652	-2.20198	0.138361	0.828265	0.828265	1.88836	1.87326
638	E2AK65	Str_synth domain-containing protein	2.5788	1.41258	-1.11725	-2.60998	-3.2002	0.0238606	-0.207945	-0.622488	-2.47695	-1.70967	-1.40426	-1.9498	0.275662	0.00736008	-2.32027	0.829041	-1.24242	-0.756183	-1.55428	-1.36033	0.904469	2.17377	-1.26704	0.230984	-1.0481	0.772923	-0.0116972	3.12546	-0.906169	-0.619248	1.1114	0.227764	-1.09599	-3.27093	0.117784	1.0951	-0.973869	1.61653	2.64784	0.314138	-0.162817	0.863209	-0.650863	-0.847151	0.847151	-1.87293	-1.87104
1315	XP_025268342.1 UDP-glucuronosyltransferase 2B19-like [Camponotus floridanus]	NA	0.582993	-0.311744	1.72357	-1.42638	-0.651771	-4.52246	-0.213098	-0.555501	0.517462	-1.71599	-0.598805	-0.900545	0.583587	-0.46504	0.0942746	-1.65906	-0.094124	-3.89166	-1.89655	-1.42457	-1.70805	-1.06224	-1.6945	-0.333673	-0.801382	0.131656	-0.774066	1.18245	1.98912	0.0451685	-2.7769	-0.627627	1.17591	0.935193	1.17965	-0.148999	0.328664	-1.24974	-3.24707	2.66572	0.258377	0.227619	-2.15523	-0.825904	0.825904	-1.87886	-1.86478
275	E2A4X8	Trehalase	4.76221	3.99596	3.6358	2.6834	4.28617	-1.96288	3.76778	-2.16814	0.779332	1.63627	6.061	7.12339	5.61995	-1.25556	5.03416	3.82346	-1.90819	3.53834	-2.58054	4.03124	2.36644	0.582664	3.81241	3.60143	1.16426	2.90367	2.01073	4.3633	3.292	2.54544	4.25466	4.00061	3.71031	3.3843	4.92389	6.38592	4.92393	4.00848	6.77907	1.34904	3.57114	3.58353	3.79349	-1.2203	1.2203	-1.73592	-1.85988
873	E2AX13	Aminopeptidase	-2.69141	-0.0740942	0.116499	0.254021	-0.375786	1.27445	-1.0311	-2.2016	-1.54133	-4.04933	0.557815	0.704986	-2.63475	3.28453	2.11209	-4.19803	-6.58712	-0.454138	1.05393	2.0631	-4.86318	0.108066	-1.03083	0.845073	0.799971	1.31301	2.06195	0.889453	-0.81227	-0.52396	2.57467	-0.710092	-0.667144	-0.787589	-0.771097	1.47817	-0.140231	0.231806	-1.28613	0.636336	-0.642394	0.0588384	-1.2569	-1.04297	1.04297	-1.76038	-1.84654
717	E2APH9	Uncharacterized protein	2.03168	0.425196	0.378909	1.78737	-0.643291	0.568532	1.36753	0.535675	1.10751	-0.216324	1.15975	-0.822356	-1.37259	-1.36624	0.206689	0.165823	1.29809	-0.574931	-0.40686	0.424809	1.374	1.22606	-2.52789	3.07594	-0.122815	0.134083	0.356925	-1.83727	1.84169	0.483332	-1.37643	-0.289887	-1.97153	0.776173	0.401996	-0.577472	-0.683262	-2.73798	-3.43135	-1.49639	-1.91277	-2.1246	1.07751	0.787103	0.787103	1.87078	1.83728
795	E2AST3	Low-density lipoprotein receptor-related protein 2	-1.63578	0.901119	-0.961172	-0.790757	-0.181132	-0.272039	0.985382	-0.768537	1.57107	1.40576	0.150477	-1.83292	-2.129	-2.45468	1.1492	0.25766	-0.701138	-1.00076	0.676164	1.29953	-2.89354	0.996924	0.249298	0.690114	0.0701032	-1.70899	-0.202951	-2.87916	-3.67945	-2.52382	-0.538277	-0.636712	0.102517	0.442181	-0.796014	-2.78258	-1.72106	-0.447772	-3.43798	0.132037	0.974436	-1.50094	-0.254274	0.77498	0.77498	1.86477	1.82571
729	E2APZ5	Na_H_Exchanger domain-containing protein	-0.00192633	1.71626	-1.69186	-1.13806	-0.90785	1.36161	0.292601	-2.4194	-1.00304	-3.97218	-3.02909	3.75608	-1.55744	1.86489	-2.2808	1.29993	-3.55033	-2.42764	1.34791	-2.71787	-0.465811	-3.2128	0.398451	-2.43724	-0.806992	-1.07158	-0.685704	4.05296	0.367049	-1.28516	0.80939	1.50173	0.821264	-1.19682	1.70142	-0.0705784	1.48454	-2.34115	2.8203	-0.204587	-1.24535	2.32137	-0.190816	-1.01452	1.01452	-1.74405	-1.82454
373	XP_011254059.1 uncharacte	NA	-1.07369	-2.29246	-0.301109	-1.00503	-0.763085	0.250057	-1.01529	-0.360624	-0.407346	-0.942723	-0.800093	-2.49722	-0.429937	-1.09839	-0.53737	-0.50466	0.159447	0.994225	-0.408431	-0.661427	-2.26547	-1.06464	-0.958471	0.803668	0.475337	-0.701181	-1.38922	-3.40413	0.255978	0.351541	0.853739	3.11621	0.362467	0.998962	-1.74296	0.731238	-0.117257	-1.65626	1.06134	0.707116	0.0469768	-3.17237	0.897926	-0.705858	0.705858	-1.92009	-1.81692
639	E2AK80	AIRC domain-containing protein	-1.29562	-0.871437	-2.50364	-1.93693	-2.19712	-0.696745	-2.34386	-1.92747	-0.605416	-1.81564	-0.928748	1.6056	-2.14587	-0.0993933	-0.7552	-0.573693	0.793466	-2.17766	1.21276	-1.06361	-0.059909	-0.227741	-1.84127	-2.53245	1.58535	-0.206052	-4.01357	1.60728	0.0116486	-0.486997	0.300392	-0.235211	1.34558	0.892931	0.0783277	-0.332658	-0.251266	-0.595845	-3.30945	0.134975	0.331411	0.654468	0.557605	-0.753134	0.753134	-1.87052	-1.81634
943	E2B0D3	Protein FAM151A	5.57766	3.75215	1.65345	3.80018	2.72623	0.448509	3.38167	0.538641	0.14322	0.00927645	3.34193	6.33874	7.4252	-0.649655	-0.887387	2.26008	-1.76008	2.19483	-0.553665	3.61302	1.75553	0.518334	2.18209	5.91038	1.77175	2.85569	2.25526	4.60799	3.37829	1.77738	2.65077	2.21574	3.74999	3.42436	6.6004	4.88749	4.99283	3.1917	2.92658	-1.33531	0.523784	5.94821	1.93927	-1.13493	1.13493	-1.70135	-1.81225
77	E1ZVG3	Estradiol 17-beta-dehydrogenase 8	0.625991	0.0864112	-1.10453	-0.566228	-2.03236	-2.41444	-2.12254	-0.281405	1.8516	-0.348598	0.465114	0.517413	0.479215	-1.14136	-1.83853	-1.42995	-2.38824	-1.59211	-0.0557051	-1.17853	-0.569075	0.824407	1.05618	0.40141	0.155895	0.384592	-0.693231	-0.644801	0.0446953	0.273611	1.35532	0.854173	-0.728355	-1.7462	-0.0436953	-1.09095	0.449486	1.11965	2.57581	0.675312	-2.82082	1.27903	0.781894	-0.701198	0.701198	-1.91573	-1.8104
882	E2AXL2	C-type lectin domain-containing protein	0.250761	0.297709	3.5085	0.425908	1.50605	1.98945	0.235272	0.753812	1.55284	0.86211	1.4184	6.70114	-1.08607	0.0583074	1.18691	0.358739	1.21903	-1.34967	-0.0827894	0.226046	-0.0338859	-2.2733	-0.723747	-0.151257	1.20586	1.55035	-1.1809	-0.504589	1.53771	-0.214168	0.600022	-0.508615	0.595881	-0.292166	-1.10407	1.71809	-0.812921	-2.05764	1.64812	-0.203674	-0.816063	-1.90477	-1.05756	0.836814	0.836814	1.79977	1.80879
892	E2AY00	Carboxypeptidase	-0.12232	0.407446	0.274817	-0.351439	1.49254	1.32569	1.25962	1.01329	-1.95692	-1.4723	-4.33964	3.98833	4.16229	0.831905	-0.942439	1.17135	0.30822	-0.92169	-0.418246	-4.35714	-0.0928143	-0.361003	-0.467991	1.99163	0.594956	0.626542	-0.147942	2.03412	1.09508	-0.612795	1.50054	0.97434	1.53802	-1.8067	1.66344	0.647285	1.88183	1.21017	5.86631	-1.41728	-0.480007	1.52355	1.09658	-0.970221	0.970221	-1.73897	-1.80764
270	E2A4Q4	CYTOSOL_AP domain-containing protein	-1.79884	-0.309619	-1.6708	0.511376	-1.97965	-2.64527	0.691938	1.67486	1.91001	-2.04013	-1.74644	4.02036	-1.62244	-2.1207	-1.2954	-1.07065	-0.537972	-2.59632	0.928955	0.0237409	0.606437	0.443374	-1.87772	0.650248	0.538744	-0.0789345	-1.67045	4.56859	1.93483	3.68313	0.440454	0.957698	0.698428	0.173137	-1.53988	-0.725957	-2.15705	0.75992	3.16532	-1.70746	0.183402	-1.83685	-0.0706372	-0.941852	0.941852	-1.74774	-1.80649
1018	E2A4E1	T-complex protein 1 subunit theta	-0.536716	2.89667	0.852484	-3.14668	-1.76547	0.341184	3.31155	0.13195	-1.49565	-0.339556	0.66193	-1.94633	-0.618394	0.407641	-0.105339	0.0525407	-1.97114	-0.521571	1.92596	0.710298	-0.866727	0.595506	-0.781233	-0.925872	-1.12526	-0.245669	-0.34109	-2.22881	-1.51479	0.968804	-1.09841	0.90348	-0.564519	-1.48698	1.92775	-0.596575	-0.640731	-2.38752	-4.26634	-0.699081	-1.41299	-0.64661	-1.31834	0.789018	0.789018	1.81425	1.79614
787	E2ASK6	Putative serine protease K12H4.7	-0.23334	-2.85271	0.0729171	0.269784	-0.302323	-0.791748	0.661224	0.0879858	-3.07088	-0.806949	-2.47099	-2.38308	-1.07991	0.744152	-1.20665	0.179098	0.163955	-2.14644	0.945361	-1.31933	-0.416687	0.59994	-0.247423	-1.11114	-0.409177	1.35133	-0.737786	-3.59163	2.41384	0.703076	1.05892	-0.234052	-0.0341779	-0.621942	1.75353	1.44603	0.0175784	-0.0284042	-0.372907	-1.63997	3.23694	-1.96816	0.687755	-0.774419	0.774419	-1.82499	-1.79609
777	E2AS86	Peptidase S1 domain-containing protein	-0.541172	-0.251987	1.41118	-0.317374	-0.850758	-0.807475	-0.311207	-1.16873	-2.83814	2.07118	1.19121	-1.83565	2.11056	-1.74264	-0.540407	0.847454	-0.698708	1.48713	-1.21123	-0.112703	-1.44998	-0.400472	0.515599	1.99985	-0.482175	1.78759	-0.41839	-0.640735	2.97314	2.50906	0.275454	0.0102352	1.58952	0.0259049	0.729819	-0.792909	0.644296	1.94328	-4.05482	-0.457568	1.43753	2.09692	-0.0764828	-0.791685	0.791685	-1.80469	-1.79032
1309	XP_025267906.1 alpha-tectorin [Camponotus floridanus]	NA	1.41479	-0.479638	-0.717626	3.1103	1.09293	2.6885	3.1377	3.34149	0.43003	2.77549	0.712659	3.05715	4.19981	1.95654	4.08335	0.897315	0.624688	1.58713	3.50284	3.08888	3.01306	3.10605	2.9798	2.08563	-0.251957	0.41086	0.396157	0.997067	2.85224	1.96113	1.08379	-1.25746	0.777247	1.05594	2.5317	-2.12191	3.2446	2.61835	5.58524	1.0396	-0.984003	0.674014	3.21264	0.861117	0.861117	1.76143	1.78859
595	E2AIW7	Importin subunit alpha-7	0.769924	1.44542	1.81488	0.881251	-0.808118	-0.549178	2.51925	0.75685	0.172897	1.71278	0.28186	-1.65338	-0.140223	1.67299	1.36377	1.56748	1.53727	0.99775	0.563374	-0.0409851	1.5344	1.57254	1.46177	-0.154683	-0.754415	-0.433556	2.64869	-2.97947	1.36692	0.566878	2.41107	1.35902	1.16878	0.441224	-1.32781	-0.531402	-3.82727	-0.773164	-0.355025	1.81263	2.39343	-0.329615	-1.01509	0.760624	0.760624	1.81216	1.77865
958	E2B1B7	Proactivator polypeptide	2.4151	2.0482	0.104871	1.54559	-1.05702	-0.797335	-0.0752474	-0.129699	-0.59564	-1.1155	1.05087	3.48616	4.60351	0.533801	1.45949	1.60682	-3.6012	0.729318	-3.60653	1.88035	0.605107	-0.737739	1.89053	3.01293	0.888575	-1.86875	1.36241	0.825397	3.11803	0.336162	1.2757	0.815971	1.65016	1.27954	4.03638	0.986479	2.00745	1.83802	1.99102	-1.43573	1.24033	2.77446	2.64913	-0.906843	0.906843	-1.72531	-1.77567
434	E2ABV3	Lachesin	-0.396189	-0.28191	0.256218	-0.436173	-0.546201	-0.360418	0.441161	0.670335	1.15442	-0.0657262	1.44446	2.74529	1.13208	-1.38314	-0.963197	-0.484973	1.43423	-2.42521	0.39247	-0.762831	1.84204	0.484603	-1.82652	-1.04398	0.767147	-1.00224	-1.73121	-3.07509	1.38926	-1.58563	-2.74086	-0.317202	-1.35927	1.70991	-0.0198941	-0.490615	0.763403	0.171951	-1.42874	-2.34838	-1.81274	-0.19151	1.51202	0.731457	0.731457	1.82986	1.77343
398	E2AAH7	Uncharacterized protein	-1.46985	0.927618	-0.199291	5.66468	0.276332	-1.78296	-0.797751	1.58128	0.186704	-0.648172	-0.602099	2.90106	-0.29879	0.911673	1.31509	0.00679573	-0.663821	-0.624154	-1.7782	0.463195	0.758704	-2.28384	3.89212	-0.55041	-0.964375	-1.34076	-0.431001	-1.87072	0.581249	0.390705	0.199546	-0.923448	0.504543	0.799751	0.664199	1.05073	-0.412901	0.22678	-1.82201	-0.69304	-2.04187	-0.288986	-2.91216	0.82807	0.82807	1.74801	1.7637
1234	E2ATE8	Arginine kinase	0.0761859	-1.39797	0.678611	1.69098	0.153913	-0.393354	0.536121	-0.359699	-0.971119	1.47833	0.455652	-1.21609	0.743367	0.0881536	-1.52234	-1.33771	-0.363065	-2.04806	-0.846383	0.691202	-0.832941	0.271676	0.578428	-1.32675	-1.66723	-0.47393	-1.19125	-1.19994	2.08561	-0.737039	-3.06618	0.56941	-1.1475	-0.880468	-0.664029	-0.390492	-0.986987	-0.611424	0.0751727	-1.71398	-2.42279	0.337925	-0.362151	0.621478	0.621478	1.95705	1.76333
88	E1ZW64	Bumetanide-sensitive sodium-(Potassium)-chloride cotransporter	-1.18069	0.516246	1.11669	-0.0682701	0.955372	1.7188	-0.149142	-0.499384	1.71097	-0.602049	-1.4596	0.0208361	-1.3529	1.28773	-0.418336	-0.228356	1.16192	0.767825	0.870062	-2.03912	-0.155859	1.29421	-0.684703	-0.961766	1.49457	-1.06204	-0.0871452	-0.433056	-2.27658	-0.626094	-0.331771	-0.759129	0.276599	-0.338591	1.5964	-0.946724	-2.24974	-1.95373	-2.26579	0.163734	0.975466	-0.433724	-0.356726	0.641064	0.641064	1.91772	1.75976
875	E2AX30	Translocon-associated protein subunit beta	3.86308	2.21982	0.167031	1.44347	0.0902266	2.37122	-0.796413	-0.668074	-0.819617	0.39785	1.02341	-2.72835	1.66244	0.553131	0.958441	2.91271	0.625115	0.35769	0.417785	1.61997	1.58395	0.812147	-0.266012	0.397465	-1.90646	-1.04222	-1.13677	3.08235	-1.67027	-0.603863	0.369366	1.28956	0.246999	0.766113	2.12841	-1.87172	-2.78642	0.417619	-3.11605	4.23442	-0.778631	2.05791	-2.39853	0.889994	0.889994	1.71255	1.75901
277	E2A543	Prostaglandin reductase 1	4.61548	3.65881	-0.793892	1.18912	-0.470356	3.87225	-0.359813	6.86839	0.476037	0.230231	3.17186	4.91836	4.91297	5.20921	4.18131	3.22875	-2.4613	3.06623	-0.143215	3.55963	2.28784	0.0881855	3.91597	1.06303	-1.63296	3.46038	1.46609	4.54542	4.48379	3.38977	3.55974	3.58875	3.09161	3.98795	4.4573	2.21917	5.54899	5.57907	6.42069	2.29083	3.62492	4.81304	3.88256	-1.09105	1.09105	-1.65345	-1.75897
600	E2AJ14	40S ribosomal protein S8	4.15274	1.25373	-0.532499	2.86186	1.10226	2.96802	-0.12833	-0.857995	-0.12177	0.125497	0.391839	1.81301	2.17733	-0.270494	-0.262478	0.333808	-1.93067	0.201931	-0.673362	0.538684	0.453547	-0.801349	-0.0656056	0.509566	0.883001	-0.189912	-0.519133	0.420827	0.057239	0.440175	-2.71935	0.171918	-1.2497	-2.59956	0.541553	-0.149187	1.9397	0.352465	1.56098	-2.55164	0.708493	-0.272339	-1.25883	0.749652	0.749652	1.79085	1.75654
867	E2AWR1	Proteasome subunit beta	-1.56572	2.27104	2.52342	1.25665	-0.0590156	-1.52191	-0.630841	-0.425398	-1.63203	2.95654	-1.56706	0.977214	-1.86663	1.50995	2.36961	0.395239	-1.41454	-0.738457	0.536391	2.58906	3.85978	-1.16612	2.62639	-2.28879	-1.1129	2.46414	1.2573	2.38119	0.736567	1.86695	0.551819	4.48141	1.89674	-0.0109955	3.92054	1.58488	3.11525	-0.22581	0.715964	-0.6305	2.74056	1.48799	3.22732	-0.917391	0.917391	-1.6928	-1.75135
1187	E2A1F2	Sulfatase domain-containing protein	-0.509082	-1.70592	1.13113	-1.25685	0.709085	0.601668	-1.07926	-1.32277	0.301975	0.57624	1.4309	-1.89029	1.47278	-1.36329	-1.88057	0.0496617	-0.469582	-0.899588	-3.85797	-0.0441524	-3.27505	3.50897	-1.88189	2.33058	1.09577	3.0781	-0.0346137	0.110256	-1.09362	-0.767133	-1.91232	1.57982	1.68783	2.3549	0.987075	-0.880283	-0.456148	0.741438	-4.40324	-0.767536	0.513003	0.467642	3.14706	-0.895617	0.895617	-1.69603	-1.74696
87	E2AEG2	40S ribosomal protein S7	-2.04279	1.33209	0.240588	0.80496	0.168768	1.86094	2.5253	0.331132	0.214381	-0.507673	-0.55201	-2.08464	-0.685595	-0.602756	-0.262067	-2.00868	-1.43877	1.31311	-1.03097	0.957583	0.638872	1.87577	0.338817	-2.80988	0.679231	0.149039	1.5462	-0.297498	-1.19374	-0.999676	-0.52045	-1.29993	-0.386351	-0.0246045	-1.16011	-0.284607	-0.918457	0.00366121	-3.43301	-0.457097	0.361205	-1.4242	0.0332466	0.682128	0.682128	1.8391	1.74494
1133	E2AW29	ADP-ribosylation factor 1	1.97318	-1.60442	0.944536	1.85577	0.452896	-0.466814	1.04676	0.671326	0.998538	-2.1238	0.294468	0.367685	1.22461	0.244354	1.09631	1.02855	2.15594	1.1725	-1.01575	1.41174	0.777976	1.3147	3.03173	-2.80116	-2.61648	-1.2549	-1.13434	-1.21476	2.06148	1.38641	1.58672	-0.883589	0.873679	-1.01958	0.117664	0.423985	1.833	1.09388	0.198066	-0.489856	1.65582	-1.69991	1.83118	0.735364	0.735364	1.77995	1.74005
497	E2AE43	MFS domain-containing protein	-0.318924	1.35349	0.230585	-0.904827	-0.397993	-1.05581	-1.24013	1.62995	0.889961	0.15943	-0.0626117	0.12463	-0.720613	1.0179	-0.619389	-0.924369	-2.62769	0.32976	-0.624684	0.225382	-0.178782	-0.347558	-0.28104	-1.5202	-1.67294	0.479827	-0.982017	-4.10211	-2.39332	-2.55985	-0.232268	-0.416581	1.06215	0.237094	-0.0696161	1.1976	-1.85841	0.413424	-2.4926	1.54199	-2.08835	-1.10893	-0.802895	0.679559	0.679559	1.83121	1.73773
224	E2A286	Uncharacterized protein	-1.21857	-1.8341	-0.826969	-0.409122	0.142504	0.684267	-0.783207	-0.924418	1.52363	-1.29455	-2.18687	-3.08506	-0.265587	-0.172362	1.3793	-0.0925738	-0.355589	-1.98858	0.790279	-0.306981	0.604363	-0.536053	-1.87983	0.0913222	0.454778	-1.3162	0.351249	-1.4183	-2.40246	-0.00883227	-0.735774	0.125673	-0.913949	1.03528	-0.306719	0.734831	0.189302	-0.505294	0.290902	0.362293	2.23492	1.39223	2.09222	-0.65416	0.65416	-1.86123	-1.73668
1049	E2ABZ4	ATP-citrate synthase	0.0203245	-1.77401	0.772094	-1.92091	-5.42239	-1.00979	-3.80983	1.17139	1.3308	0.93058	-5.48875	0.710401	-0.199871	-1.55226	-2.29307	-4.85791	-2.00346	-0.987177	-1.14652	-2.54788	0.767424	0.991079	-0.25692	-2.1948	0.225223	-1.66622	-0.669766	0.659262	2.23789	-1.1371	-1.61687	-0.374788	-1.40582	1.33877	2.24974	-1.52778	-1.38337	0.901747	1.71885	0.591093	-1.2268	-1.29009	-1.67926	-0.929959	0.929959	-1.6697	-1.73515
649	E2AKW1	Ejaculatory bulb-specific protein 3	-0.382461	-1.27614	-0.353606	-0.159732	3.66249	1.41644	0.524977	-2.00235	-1.27094	0.259384	0.946827	4.8176	0.233599	-1.11424	0.00857286	-1.33667	-0.20705	0.108695	0.674521	1.53849	0.0543418	-1.28813	0.196698	-0.707752	-1.94471	-0.851002	-3.21268	-1.59782	0.752121	-2.09725	-1.55578	-0.49697	0.0776854	1.61915	-0.253868	-0.601919	0.265808	2.173	-2.71003	0.430376	1.2154	-0.912182	-1.01495	0.790791	0.790791	1.72972	1.73206
860	E2AWG1	Uncharacterized protein	2.90955	0.810651	0.729026	1.54287	-0.947837	1.37174	-1.04829	0.904426	-0.191197	-2.81142	0.636829	4.17909	3.53464	-2.30085	-0.83777	-1.15092	-1.23294	-0.790527	1.74172	2.20804	1.1403	1.45799	-0.521201	-2.41953	1.88445	0.645157	0.215885	-2.07365	-0.122738	0.998775	-0.919115	-1.46345	-0.553829	-1.38857	0.35536	-0.471364	-1.47812	1.06491	-4.32412	1.54352	-1.80669	2.78653	-0.455001	0.891859	0.891859	1.67922	1.73137
786	E2ASJ8	Uncharacterized protein	-2.13034	0.374811	1.07015	-0.762636	2.92782	-1.53925	1.36645	0.399425	-0.952738	0.26851	2.20978	0.544036	0.287744	1.59055	-1.30102	0.570443	1.43736	-0.963748	-0.735766	-1.86847	0.384806	0.820503	-2.57237	-0.831605	0.995086	0.203768	1.37288	-1.84001	-1.84222	-0.740616	1.5631	0.549155	1.1678	-3.08291	-2.92454	1.12938	-1.33776	-1.22695	-2.96067	1.09968	-1.79011	-0.81694	-3.67221	0.811287	0.811287	1.71355	1.72873
798	E2ASW6	60S ribosomal protein L10a	0.00642597	-1.58213	-0.323173	-0.560261	-1.22884	-2.79723	0.408842	1.127	3.65594	0.74739	-0.860751	1.67696	-1.81951	0.51133	0.103101	0.672531	-0.704919	-1.26544	-0.861667	-0.531198	-1.70769	-1.02132	1.64515	0.282193	0.614688	-0.850285	-0.458172	4.4962	0.813202	0.680457	0.0180133	-0.138981	-0.364553	0.00240972	0.665436	-1.54251	2.2995	-0.730565	1.27284	-0.25103	0.337327	1.5351	2.06246	-0.741946	0.741946	-1.75722	-1.72726
853	E2AVZ2	Acyl-coenzyme A oxidase	-2.4109	-4.04882	-0.161619	-3.19369	-1.64675	-2.58445	0.226249	1.06759	-0.297585	-1.22813	1.6735	2.25135	-1.2707	0.441727	-3.21158	-1.25495	0.133009	1.7808	-0.982024	-0.537642	0.140872	-0.469181	0.293354	-1.75956	1.12488	-1.49797	3.77438	1.1539	-0.117432	-0.723422	1.39638	0.041827	-0.128145	0.277466	0.944395	0.316668	-0.235043	0.15567	-1.43091	0.0841585	1.29642	-1.15921	-1.11177	-0.784899	0.784899	-1.7078	-1.71209
272	E2A4R1	Vacuolar ATP synthase subunit S1	0.430854	-0.440056	2.05038	-0.840892	-1.58614	-2.59159	-1.25596	-0.718785	-1.21291	-0.457655	0.213092	1.215	1.0301	-0.529165	-0.0576009	-0.508977	-0.993559	-0.949248	-0.69014	-0.946462	-0.677634	1.42301	-1.16853	-1.8388	-0.875428	1.39412	-2.09143	3.2451	-1.42493	0.242598	-0.0934263	-1.01255	1.18021	1.44898	-0.447095	-0.671332	0.390854	-0.754673	3.71706	0.941903	1.33647	0.983594	0.35097	-0.703844	0.703844	-1.76747	-1.71122
138	E1ZYQ1	Dipeptidase	-1.02141	-1.34294	-0.478424	3.57689	-1.62816	0.371129	-1.87545	0.263776	-0.459622	-0.978343	0.999429	4.74343	-1.89728	1.23103	-0.47914	0.52021	-0.21378	-0.770308	-3.0358	0.266086	-1.78869	-1.93181	-0.562135	0.925039	1.8969	1.24673	-3.05731	4.62904	0.670617	1.36222	-0.80964	0.350573	-0.169758	0.394216	-0.635793	-0.305261	1.18472	0.450187	5.45309	0.818745	0.157789	-1.35784	-0.665494	-0.909168	0.909168	-1.63948	-1.70256
219	E2A225	Uncharacterized protein	0.873936	2.53484	5.97818	2.76382	-1.13078	0.843097	0.226217	0.489997	-2.27697	-0.273468	1.93506	-1.73421	-0.913032	-0.902991	-0.948834	-1.59116	-0.689881	-0.133054	0.971402	2.31622	0.475538	-0.17052	6.13568	0.499827	-0.316393	3.52843	3.81886	-2.33512	1.01356	4.18684	5.19787	1.83886	2.3937	2.9376	2.91482	0.812545	0.336375	2.40675	0.681645	0.459999	0.720618	1.3849	0.169866	-0.990008	0.990008	-1.60829	-1.69598
896	E2AY08	Peptidase S1 domain-containing protein	-1.40651	0.719661	1.43899	-0.52556	0.154238	-0.635617	0.889934	-0.488717	0.749255	-0.0634282	0.957773	0.665058	-1.23164	-2.24002	1.45259	0.976779	2.7319	-1.10949	0.107728	-1.43599	0.752548	1.5216	-1.73928	-1.54991	0.411434	-2.38259	0.994564	-3.32658	-2.12358	-0.505001	-1.22633	-2.80253	0.422967	1.08068	-0.460703	1.22281	0.828215	-1.98347	-3.36627	-0.507829	-2.62429	4.84637	-1.64971	0.832557	0.832557	1.66051	1.69436
824	E2AUK6	V-SNARE coiled-coil homology domain-containing protein	-0.815341	2.43323	0.615497	-0.278818	0.996458	0.379706	0.172555	1.04425	-0.761576	0.415298	0.868751	-2.49994	3.56144	-1.25433	0.156385	0.597842	-1.72794	0.943143	-0.806632	0.536975	0.41992	-0.47771	2.21688	-1.02299	0.233393	1.45009	0.194298	1.53279	0.521927	1.33194	0.220686	-0.962471	0.61883	-0.0886041	1.81302	1.16274	0.915299	1.19621	4.53086	1.72447	1.74056	-0.0279395	2.73924	-0.698345	0.698345	-1.74616	-1.69254
1156	E2B052	Signal peptidase complex subunit 3	-1.13226	1.34928	0.606856	1.31615	0.762088	0.0317054	1.2571	-0.870039	1.33671	0.517119	-1.6786	1.56338	2.79633	-1.09844	0.261219	0.181634	0.259676	1.33087	0.180263	0.265121	1.1637	-0.795669	-0.657794	1.30593	-1.75125	-0.149798	0.77264	2.13401	0.598895	0.861068	1.15697	0.102044	1.38456	-1.2939	-0.36973	-3.2563	-3.37947	-1.4918	-0.0582194	-1.39877	-1.44875	0.509764	-0.274282	0.691294	0.691294	1.75072	1.69111
908	E2AYP3	F-actin-capping protein subunit alpha	-0.763716	-2.45725	2.08334	-1.57197	2.8433	0.265825	-1.57909	0.314788	-2.41767	-2.1325	-0.0462166	-2.56726	-3.1273	1.22112	-2.69182	-1.12993	-1.52934	-0.155875	-2.60783	1.08929	0.402643	-0.750044	-2.021	-0.580817	1.32924	0.809242	-1.24315	-1.043	-1.94084	0.456724	-0.0629496	1.73003	0.529266	-1.02027	-0.425829	2.08602	-1.54246	1.74016	-1.66651	0.931871	0.328533	-0.861728	-1.09312	-0.76339	0.76339	-1.69397	-1.69087
115	E1ZXJ9	Uncharacterized protein	-2.40798	-0.837783	-0.772778	-1.35555	-0.149199	2.22948	0.41908	-0.0643916	-0.557247	1.99459	0.297688	-1.57565	-1.6019	0.632308	1.6353	0.911345	0.0664912	-1.37396	0.00518521	-0.292858	-0.811133	-1.8943	1.47905	0.113542	-0.59342	0.691856	0.341275	-0.708843	1.45991	0.439309	0.22402	2.13561	0.477697	1.23436	-0.694232	0.765573	0.225702	1.55177	-0.683053	-0.814946	0.0722623	1.32611	1.28633	-0.617508	0.617508	-1.83896	-1.6901
1259	E2A460	PKS_ER domain-containing protein	1.95955	1.39138	1.14868	0.968237	-0.366758	1.34432	-0.458512	0.0935502	1.69067	1.68506	0.274637	1.60908	2.74959	1.7946	2.34336	1.24172	-0.830021	0.388406	-0.431391	-0.0439426	0.88498	1.50972	0.0838935	-1.83345	-0.420102	-0.165735	-0.209185	2.00881	0.666361	-0.793273	2.60981	-1.3408	-0.151095	0.322088	0.988416	0.0275926	1.26346	-0.895484	2.66085	-0.387108	0.317912	2.3197	-1.54382	0.642136	0.642136	1.80226	1.68899
1214	XP_019884999.2 anther-specific proline-rich protein APG-like [Camponotus floridanus]	NA	0.156886	-0.437952	1.36843	1.47303	1.41095	-0.188142	-0.211366	-1.34518	-0.0978294	-0.031119	0.185318	-2.62713	2.19676	-1.13975	1.74569	-3.05566	-0.741077	1.83491	0.921213	0.575338	-1.27312	-0.62557	-0.658125	-2.37462	-0.625307	-3.08533	-0.618944	-2.5394	-1.28448	-0.649091	-2.55132	-0.200987	0.968156	0.0988191	-0.860388	0.912758	-0.726363	-0.516923	-3.16729	-1.59436	1.13705	2.03441	0.400065	0.737677	0.737677	1.70621	1.68681
1146	E2AY28	Uncharacterized protein	12.9797	12.6646	12.7846	13.3877	12.2197	12.5826	12.9797	13.6234	12.5844	12.8004	11.9301	11.0661	13.3429	13.5485	12.595	13.1801	11.6707	12.6739	12.037	12.9735	12.2923	13.492	12.7995	13.6394	13.2298	13.0924	12.2611	11.2975	14.1398	14.1977	12.8822	13.7964	13.6505	13.3689	13.8955	13.1326	13.476	13.9129	10.8678	12.5652	14.0019	12.6463	14.096	-0.5028	0.5028	-2.11823	-1.68004
173	E2A0B6	Sodium-coupled monocarboxylate transporter 1	-0.855923	0.392398	-0.140964	2.10685	-1.23861	0.0975142	1.07548	1.35902	-0.279098	-0.308608	0.923478	0.398829	-1.41725	1.12119	0.44567	-0.69494	-1.15013	-0.593916	0.0507397	-0.913077	0.0873453	0.266879	-0.227283	-0.749402	-0.657104	-1.98695	-0.70302	-0.519576	0.545497	-1.70323	0.485084	-1.15582	0.129049	0.457469	-0.762765	2.56211	-0.239969	-1.67429	0.63987	-2.06269	-1.44305	-1.3525	-0.972578	0.580176	0.580176	1.88263	1.6773
1162	XP_011267484.1 facilitated trehalose transporter Tret1 [Camponotus floridanus]	NA	-0.0983135	0.0898766	0.109784	0.0391182	-1.754	0.741067	-1.39059	-0.380259	0.790551	0.459806	0.177774	-3.18287	1.45789	-1.96304	-0.316728	-1.63313	-2.23403	-1.23577	-1.48785	0.265825	-0.556704	0.932421	-3.25411	0.262333	-0.29941	-0.445353	3.53494	-1.13221	0.259615	0.314283	-0.392626	-1.00095	-1.36923	-0.289514	1.3532	1.63364	-0.265776	-1.01211	1.60151	-1.60736	0.81221	-1.73882	1.03037	-0.689536	0.689536	-1.72809	-1.67399
645	E2AKQ2	Phospholipase D3	-1.00072	0.900361	0.686997	-3.25827	-0.144051	0.65584	1.54867	1.82589	-0.9815	0.443513	0.0149954	0.0447308	0.0302459	1.12905	-2.09542	-0.289054	1.81519	-0.553535	-0.937871	-0.123364	-1.44471	1.95695	-1.21675	0.215159	-1.04816	-2.54196	-3.10095	-3.15003	-3.01831	-1.77976	-1.63118	3.33204	0.549259	0.177193	-1.54255	0.518081	0.188917	0.0135275	-1.37013	-0.864405	-0.881889	-0.913613	1.16293	0.741126	0.741126	1.66085	1.65412
190	E2A0S5	Soluble NSF attachment protein	-0.677027	-1.27664	-0.167659	1.02797	0.553789	2.06761	0.596791	2.18655	1.22187	1.08172	0.750772	-3.39845	0.075205	-1.21777	-0.93367	2.03015	0.207384	0.736504	0.894094	-1.0334	-0.124529	-1.42785	2.31093	-2.17845	-0.665047	0.149317	-0.434494	-3.70757	1.49507	-1.67852	0.973394	-2.06891	-1.74055	1.01925	-0.553066	0.542898	0.745357	1.11989	0.806093	-0.279042	-0.456646	-1.97103	-0.585595	0.711832	0.711832	1.67434	1.64858
1276	XP_025264718.1 mediator of RNA polymerase II transcription subunit 12 [Camponotus floridanus]	NA	4.31004	2.9673	2.74735	6.69116	-2.82108	5.18387	3.60897	4.12444	4.25892	5.59311	9.65779	13.0975	7.39997	6.23671	7.42635	2.66849	3.52073	2.42309	1.90349	3.56469	3.03699	6.42467	2.5413	5.00876	1.02113	0.177398	2.01611	3.79448	8.93853	0.833781	2.67107	0.26663	2.88924	2.05022	7.6656	-0.731213	7.15681	2.27494	7.74794	0.684135	-0.11979	8.89812	0.602825	1.44096	1.44096	1.49141	1.63938
1042	XP_011253798.1 neural/ectodermal development factor IMP-L2 isoform X	NA	-0.872908	1.07515	-0.408536	-2.2906	-1.01585	-0.202137	-1.10296	1.29285	-1.27185	-0.360718	-1.54194	2.96354	0.134367	0.661939	2.35794	0.0956951	0.662923	-0.689976	-0.977027	-0.881996	1.0564	-0.618923	0.589609	-1.68922	0.114035	-2.95199	-2.25262	-0.164327	-0.63966	-0.800259	-0.919748	-0.326072	-0.0714102	-1.06949	0.0717775	0.367922	-0.200173	-0.131603	-1.10804	-0.430825	-0.324102	-0.920109	0.366124	0.595511	0.595511	1.78867	1.63905
1128	E2AVB1	Zinc transporter ZIP2	-0.658976	-0.443308	-0.490284	-0.442294	-1.09988	-1.72786	-0.521628	1.3905	1.41548	0.769951	-0.870955	1.76344	-1.11447	2.96866	-1.98944	1.26425	-0.756663	-0.94781	1.06044	0.645336	1.02767	2.59307	-2.59679	-0.645281	-0.134413	0.494498	0.0166508	-1.60646	3.50486	1.47641	2.24831	2.8782	1.23511	2.59	0.975502	-0.707345	-0.980184	-0.666571	4.10992	3.77105	-1.1173	-1.22817	0.859238	-0.799856	0.799856	-1.60304	-1.63421
883	E2AXM8	Protein yellow	1.04008	0.211502	1.94724	0.467456	-0.128012	-1.40597	-0.386796	0.650769	-1.39252	-1.85904	4.91406	5.81964	1.14431	0.785706	-0.451863	0.0324028	-3.94014	-0.0415713	-2.87495	1.68132	1.14211	2.7812	1.07466	1.09141	-2.97553	0.188379	0.992702	2.66808	-1.66333	-1.68068	-2.61862	0.723712	-0.0263808	-1.88496	0.61625	0.0841946	0.350326	-0.48218	-3.03478	0.714208	-1.31564	0.558391	-0.699025	0.907134	0.907134	1.55755	1.62973
743	E2AQX7	Tubulin beta chain	4.10238	4.57047	2.60177	3.58999	1.32331	0.14904	1.95313	0.422157	-1.81065	-1.06455	1.15387	3.41431	4.35663	2.71487	3.50799	1.3907	-3.34268	-1.02866	-1.35211	2.23306	3.37319	0.710254	1.12406	2.55611	-0.755927	-0.0870153	-2.25774	3.25604	3.10394	-0.909304	1.00197	-2.28733	0.372879	-0.346694	-3.59948	-1.00658	2.6969	0.216842	3.0144	-0.587224	-0.975811	4.02319	2.06223	1.00771	1.00771	1.5304	1.62766
154	E1ZZF6	Alpha-1,4 glucan phosphorylase	-1.08366	-2.49498	-0.764345	-1.65578	-4.43122	-1.67015	1.15188	-1.10166	0.00740631	-0.435421	-1.53167	3.75103	-0.479916	0.986949	-2.98107	-3.0773	1.86055	-1.72816	-1.58731	-0.116148	-3.74144	-1.58609	-0.897291	-0.0933936	-0.135249	-2.57785	-1.36968	2.88183	-1.11459	0.609901	-1.93435	-0.37386	-2.00464	-1.07149	-1.79664	0.889654	-0.384082	1.14553	5.17443	1.28459	-0.162012	-0.295634	-1.67618	-0.876152	0.876152	-1.56299	-1.62592
1170	E1ZZF0	Xanthine dehydrogenase/oxidase	0.74482	-3.72296	-0.353658	-1.55367	1.48845	2.28844	1.53193	0.125256	1.05254	2.39542	0.844875	0.291993	-2.18055	0.648078	-1.0754	-0.582254	0.0827347	1.44818	1.70965	0.330794	-2.85269	1.00391	-3.1951	-0.317036	-0.93359	-0.511247	1.64041	-0.516468	-0.842695	-1.46191	-1.36922	-0.894651	0.682281	-0.917036	1.1315	-0.156009	-0.971312	0.577417	-5.34086	0.351569	-0.51081	-5.33836	-0.622116	0.836476	0.836476	1.57544	1.62428
803	E2ATC7	Protein jagged-1	-1.56898	-1.31124	3.18296	-1.94904	-0.607237	0.782924	0.651167	2.29381	-0.0851755	0.377936	1.67422	3.11344	-0.750209	0.575087	1.51175	-1.12729	0.0727307	-0.365341	0.24568	0.186475	0.696259	-0.352816	3.16081	-0.31324	0.568579	0.0532488	0.672613	-2.33999	-0.360908	0.76305	-1.40765	0.179005	-0.0468231	2.00639	0.99949	-1.30255	0.996121	0.41323	-1.32698	-0.00254837	-1.22899	-2.44182	-0.44072	0.680543	0.680543	1.66413	1.62256
1298	XP_025266937.1 protein starmaker-like [Camponotus floridanus]	NA	0.765644	0.230479	0.84157	2.90953	0.687136	-0.783986	1.19093	-0.44452	1.62295	0.302964	-1.64425	-0.519636	-0.271058	-1.80575	1.33385	-1.63661	0.354442	0.340173	0.382733	-0.647296	1.46629	-0.623849	-1.76495	-2.06227	-0.253052	-1.90582	0.48472	-1.97684	0.250542	1.9571	-0.273724	0.939971	-2.32063	-0.743775	-1.48235	-0.778761	2.01126	-0.616893	-1.99985	1.48786	-1.19484	-0.286249	-2.65917	0.670564	0.670564	1.67112	1.62125
1273	XP_025264610.1 lysosomal aspartic protease isoform X1 [Camponotus floridanus]	NA	9.12717	9.36563	8.5008	5.26465	5.54181	8.51307	9.45914	11.3067	10.3049	9.17186	9.06376	7.07425	8.62597	10.7149	10.2744	10.6584	9.10438	9.96979	6.8803	10.6281	8.38258	5.84397	10.733	9.8665	9.48872	9.98803	5.29655	4.98575	10.3148	11.4593	8.33364	12.2058	10.0201	12.0986	11.2245	9.67215	10.6049	11.2453	6.88002	8.12028	11.7698	10.4665	11.9627	-0.908474	0.908474	-1.54747	-1.62107
1099	E2APK9	Ras-related protein Rab-14	-1.57534	-0.174482	-0.220531	0.229	1.77774	1.91926	1.24668	-1.01154	-0.11895	0.230422	0.759577	3.88124	3.28837	1.35465	-0.298603	1.95975	-2.25917	0.793934	1.26669	-0.579109	0.749319	0.89528	0.289466	-1.29065	-1.18887	-0.639071	1.02741	0.0367293	1.26055	0.386003	-1.27441	2.6976	-0.7665	0.842992	-1.44178	-0.658525	-1.86287	0.800347	-2.44767	0.704648	-0.469576	1.18011	1.73417	0.694714	0.694714	1.6417	1.6146
781	XP_019884451.1 proton-coupled amino	NA	-1.54485	0.132535	-0.17988	-2.07348	1.12305	-0.349328	0.927856	-1.6532	0.97386	0.0722202	0.450589	-3.07349	-0.998775	-0.38216	2.10072	2.08506	2.31904	-0.0288376	0.212668	-0.286379	0.513978	0.159791	-0.734996	-1.79664	0.546285	1.40733	-0.652158	-1.72959	-0.243938	0.56673	-1.31462	-0.156258	-1.5151	-2.3682	-2.07995	-1.20201	0.900563	-0.647244	0.259879	1.23728	-1.67882	-0.620257	-2.05485	0.646904	0.646904	1.68166	1.61262
1308	E2A4H9	Amidase domain-containing protein	2.29767	-1.70616	1.99513	0.272132	2.72166	-0.268099	1.06012	-0.71853	1.50486	-0.718799	1.56322	-2.15359	-1.45227	0.372776	0.333304	-0.663987	0.867603	-0.415914	-0.57637	-1.34953	2.17702	-1.79329	-1.11398	-0.563939	-0.698607	1.43097	-0.737296	-0.734178	-1.48916	-1.58497	-1.06414	-1.71111	-2.51266	1.28005	-0.265422	-0.717126	-1.47741	-0.985725	-0.180441	1.66959	0.870129	-2.70804	0.532337	0.67953	0.67953	1.64423	1.60752
1095	XP_011261308.1 calci	NA	3.57215	4.1205	4.63779	4.61328	-0.790743	3.4997	2.74182	2.72534	1.07738	2.63584	2.18985	0.0632986	3.901	2.16803	1.40359	4.15516	1.23761	1.83949	1.60345	2.17855	3.51626	1.7292	3.74808	4.55865	1.60701	0.0127047	1.50827	1.77949	2.68706	2.02223	1.23566	-1.07796	1.98915	0.836179	1.28518	0.349644	4.17105	4.07376	0.455359	-2.63188	3.11311	2.80937	4.37783	0.788282	0.788282	1.5726	1.60458
480	E2ADM9	ATP synthase subunit b, mitochondrial	-1.33888	0.291765	0.725838	0.193653	-2.03042	0.643117	-0.736611	-1.47556	-0.539079	-1.01651	-1.07582	-0.512001	-0.302098	-0.280722	-2.85918	-2.12941	0.224842	2.70875	-0.46677	-1.80052	-0.0947633	-0.748168	1.27918	0.229396	1.28317	-2.15781	-1.4549	1.74702	0.477895	0.880271	1.67751	-1.70395	-0.772759	0.128011	0.84405	0.285982	-0.56228	-0.603147	0.748179	0.428974	-0.0771022	1.23702	-0.345674	-0.607509	0.607509	-1.71164	-1.60211
225	E2A2D3	Methyltransf_25 domain-containing protein	0.149298	-2.75024	2.57999	-0.225594	-0.221597	1.46013	-0.912611	2.29465	0.245664	0.736065	1.7819	-1.69302	-1.34435	2.37308	1.15713	-0.420913	-0.978673	-0.894777	2.48375	1.7463	0.765537	-0.980431	0.636598	1.80327	-0.910406	1.13597	-0.615477	-1.69788	-1.39615	0.703238	1.00341	-1.33965	-0.166037	0.738085	-0.459778	-2.45746	-2.40254	0.773813	-3.54755	0.493145	1.46549	-0.0615643	-0.479783	0.718192	0.718192	1.60468	1.59926
377	E2A9Y1	Ribosomal_L2_C domain-containing protein	1.93404	-0.275585	-0.320381	-0.0888122	-0.621763	2.79756	0.033061	1.11955	-1.54816	0.0116174	0.343254	-2.64959	0.896745	-0.339156	-1.35289	-1.81858	-0.282296	1.22545	2.48965	-0.652031	-1.12277	0.117745	0.895947	0.450181	1.00453	-1.33577	-0.270974	1.33501	1.74887	1.24172	0.427364	0.873309	0.151468	0.383586	-0.467176	1.56262	3.22815	2.47561	1.35961	-1.70561	0.978718	-0.529772	0.681904	-0.645206	0.645206	-1.66025	-1.59666
1155	XP_011267102.2 glucosylceramidase isoform X2 [Cam	NA	4.8473	5.30125	5.5458	3.76686	4.44231	3.71052	3.42653	3.28317	2.90668	3.958	4.0893	3.68821	5.71858	3.89486	3.72046	5.33914	3.54887	4.35465	2.8251	5.10547	5.70098	3.78107	4.9384	4.69467	4.42966	2.77356	4.43833	4.27452	5.81052	5.95203	3.64504	5.46765	5.12925	4.357	5.66098	3.41645	6.26537	6.48407	3.3073	5.16863	3.51717	5.24933	5.9483	-0.543252	0.543252	-1.80746	-1.59479
1207	XP_019883731.1 protein Skeletor, isoforms B/C isoform X3 [Camponotus floridanus]	NA	-1.90786	-2.59548	0.0380307	-1.12742	0.218234	-0.635254	-1.56081	-0.0337512	0.185976	0.906648	-1.41046	2.64457	-1.51179	-1.64813	-2.27124	-0.196607	1.69841	0.581236	0.542822	-0.590966	0.375353	1.12054	-0.987234	-1.77005	2.26428	-4.01353	-2.75743	-1.64922	-3.85858	-0.940866	1.32732	-0.912549	-1.19063	-0.874281	-0.434846	-2.90842	-0.741842	-0.168475	-2.78879	0.250353	-0.783307	-0.347962	0.833835	0.718242	0.718242	1.5979	1.59405
412	E2AB19	Ribos_L4_asso_C domain-containing protein	2.67425	2.68517	-0.561342	1.98625	-1.25262	-1.35993	-0.854456	-0.0512637	1.56619	-0.762057	-0.200115	0.809006	3.71711	1.01162	-1.95871	-0.238004	-3.53591	-0.726541	2.38323	0.0234014	1.62492	0.671587	3.3939	1.93604	0.383016	-0.233392	1.61982	3.36445	0.693855	2.89912	3.52329	-0.78808	2.44176	0.342283	0.230567	-1.71354	3.8143	4.3938	2.98135	-0.933057	-0.542989	3.95851	-1.1647	-0.880073	0.880073	-1.52508	-1.59356
117	E1ZXR7	Zinc carboxypeptidase A 1	6.90421	4.51565	3.37654	1.0833	4.66671	-0.150783	-1.42168	0.716425	0.551371	0.817408	4.53722	6.64733	8.65284	0.867242	-0.353408	1.02359	-0.330315	6.34575	-4.22527	6.46669	4.63613	-2.1537	2.7179	3.29869	0.386407	-0.922012	1.12286	8.2319	2.41641	-1.453	6.46426	3.20697	3.16414	0.815483	5.94319	5.36267	8.19754	5.07909	7.89905	4.69314	2.33468	7.70204	2.8685	-1.41055	1.41055	-1.44774	-1.59216
586	E2AIC7	Mitochondrial carrier-like protein 2	-1.73221	0.164093	0.183274	1.71427	-1.45525	-0.361421	0.364699	1.07903	0.514823	-1.40308	0.867169	-2.16383	0.503901	-0.930994	0.285803	-1.22048	1.40979	-2.743	-0.147392	-0.331317	0.506362	-1.21374	1.01528	0.348366	-0.848524	0.767361	0.369768	-3.09408	1.12614	0.0143254	-4.34338	0.960871	-1.45814	-2.6465	-0.959985	-0.0359246	-4.07208	-0.557681	-4.01669	-0.272066	-0.00631992	-0.532482	0.49558	0.716584	0.716584	1.58668	1.58454
1107	XP_011262853.1 uncharacterized protein LOC105255330 [Camponotus floridanus]	NA	0.056526	0.275789	0.856771	0.961513	-0.849417	-3.35499	0.491568	-0.346579	0.24463	-2.5467	1.04408	0.219095	1.5184	0.363944	1.56554	-0.28059	-0.04279	0.477865	-0.749152	0.88502	0.76856	0.628012	1.98012	-0.591453	-0.468243	-1.32314	0.965396	0.172109	0.081729	-0.467727	-0.108182	-0.137797	-1.56949	-0.892922	-2.20318	-1.13113	-0.423359	-1.226	2.90701	-1.69094	-0.758056	0.28536	0.185359	0.600916	0.600916	1.68861	1.58188
318	E2A702	60S ribosomal protein L35a	-0.587768	-1.85119	-2.40977	-0.327212	-0.339165	2.33905	-0.389182	-2.28651	0.349302	-1.13107	1.27094	-2.40509	-0.186704	-0.788719	0.239233	2.92595	-0.434145	-2.83919	0.365342	0.711641	-3.13009	1.92911	-0.277238	-3.49351	1.69814	0.263563	1.94202	1.82587	-0.121399	1.14095	0.112916	0.886121	0.231136	-1.09392	-0.114795	-1.59134	-0.11364	0.176946	0.858911	2.23328	0.157995	0.698143	0.600417	-0.717172	0.717172	-1.58037	-1.57992
1193	E2A631	Ribonuclease Oy	9.15491	8.63728	9.33435	8.85046	7.73768	9.21709	8.29847	8.59381	8.11346	8.41039	7.86476	6.5831	8.9325	8.92054	9.19949	8.77899	7.36239	7.95039	8.22124	9.06796	8.84363	8.68103	8.86263	9.14308	8.95168	8.27685	8.97166	6.81988	10.4649	10.1243	8.92236	9.52707	9.37935	8.99622	10.1315	7.95704	9.35294	10.0403	5.89104	8.8297	9.6255	9.15453	9.74784	-0.51032	0.51032	-1.85394	-1.57719
631	E2AK02	T-complex protein 1 subunit epsilon	-0.42073	-0.177892	0.268978	-1.37335	0.317621	-3.14793	0.366818	-2.75562	-2.08123	-0.883152	-1.56649	-1.83038	-1.92605	-1.39327	-1.5441	1.20793	2.4255	-2.13811	-0.484611	1.62276	-3.35492	1.18906	-1.42007	-0.783794	-0.671698	1.90587	-0.744214	-1.28894	-0.0754833	1.74284	-0.963136	1.17381	-0.28965	-0.31165	0.476492	-0.611379	-0.348188	-1.89995	-1.78961	0.282497	0.848135	-1.64405	1.98341	-0.679967	0.679967	-1.59789	-1.57368
478	E2ADH2	MFS domain-containing protein	-1.0992	0.602009	-0.462466	0.882386	-0.0596805	1.72082	0.714385	0.253693	1.1005	-0.719069	0.261225	-1.03756	-1.33142	-0.415785	-0.0778294	1.11267	0.408479	-1.01697	1.44433	-0.334645	-0.356079	-0.100207	2.80232	-0.416077	-0.102472	0.165806	-0.450253	-0.726932	-0.548172	-1.6914	-0.161282	1.41578	1.88268	0.247977	0.948027	-1.55017	0.0675383	-0.389218	-3.1625	-0.22576	-2.19397	-2.43622	1.19064	0.593404	0.593404	1.67787	1.56872
358	E2A935	Putative ATP synthase subunit f, mitochondrial	-1.62101	-1.57501	2.61956	-0.200392	-0.654354	0.00473353	-1.07695	-0.660998	1.23664	-0.292428	1.05275	-0.715462	-2.50387	0.963916	-0.659943	-1.17427	-0.776352	1.33676	-0.600871	-0.13109	-0.943736	0.537933	-0.351423	-0.383993	-0.091195	-0.565563	-0.0289587	3.03616	1.2783	-0.0860996	-0.281342	0.11668	-0.460099	0.427302	-0.0716621	-2.30059	2.18329	0.523421	2.03851	-0.398158	-0.858316	2.13266	0.533572	-0.606146	0.606146	-1.66025	-1.56775
1104	XP_011262287.2 LOW QUALITY PROTEIN: MICOS complex subunit Mic60 [Camponotus floridanus]	NA	0.46879	1.01915	1.73426	-0.695296	-0.370969	-1.60068	-2.05791	-1.01578	-0.646948	-0.0627266	-1.66208	0.541661	-1.42721	-0.170015	1.02846	-1.47655	-0.425707	0.500939	0.0294675	-0.972092	-2.85086	-3.25221	0.103595	1.47361	0.898367	-0.880009	1.66792	-1.78218	1.0589	-0.807863	-0.396474	-0.052111	0.236329	-0.893313	1.73951	0.107707	-0.505376	1.92478	-2.73139	1.40097	0.758637	0.185894	-2.15894	-0.6388	0.6388	-1.62166	-1.56541
255	E2A478	3-hydroxyacyl-CoA dehydrogenase type-2	0.0559566	0.537709	-0.859516	-0.295964	-1.18218	-1.62885	1.38947	-0.854259	1.72014	-0.974485	2.16477	-3.7754	-0.928588	-2.04421	1.0906	1.70835	0.706732	-0.266684	2.48054	1.38175	-2.54322	0.630861	0.0771294	0.38337	-1.62603	0.697594	1.79822	0.730188	-0.838568	1.66025	0.53305	-0.846712	0.375821	1.2313	0.701744	2.31061	-0.608948	1.3936	1.82735	0.884357	1.22928	-0.411591	0.619476	-0.663495	0.663495	-1.59936	-1.56515
282	E2A5G4	Chitin-binding type-2 domain-containing protein	3.35136	0.666179	-1.68617	1.42889	-2.17843	0.0938305	1.85679	0.397444	1.13141	1.37307	-0.825862	4.63742	5.37009	-0.654797	-2.62142	-0.0587692	-0.313583	0.418264	-0.948316	-1.49258	1.05733	-1.84091	-1.88047	5.54778	0.0557125	-0.384522	-3.22017	5.50551	-0.259646	0.426564	2.52642	0.392458	2.41322	-0.115958	4.93544	1.83851	4.2475	-0.0739373	3.33123	1.06707	1.55698	-0.640975	-2.51673	-1.01507	1.01507	-1.46172	-1.56405
775	E2AS07	E2F_TDP domain-containing protein	-0.112791	-0.333559	-1.75903	-0.653224	-0.260898	-0.0851531	-1.61034	-1.71882	-1.70335	-2.23712	0.0896543	-0.603191	-1.96121	-0.308395	0.255707	-0.710797	-0.764973	-2.46982	-0.69846	0.727125	0.195354	-2.58345	-0.262965	-1.01706	3.98721	1.15169	1.13171	-3.48352	-2.5542	-0.473747	-0.662038	0.792857	-2.13241	0.00283749	0.349161	0.211206	-1.467	-0.541527	-0.71898	2.71156	0.0701209	1.05449	-1.98767	-0.672092	0.672092	-1.58526	-1.55982
613	E2AJI0	Ncstrn_small domain-containing protein	-0.757003	-0.545	2.83309	0.696348	2.40745	-0.902164	0.946971	1.49545	-0.283491	1.93421	-2.30202	-2.7376	-0.760374	-0.854848	-0.545999	-0.33406	0.507879	-1.95327	0.600706	-0.510728	0.477135	-1.78972	-0.265485	-0.850734	-1.06086	-1.36288	-0.836983	-1.69722	-2.20158	-0.192272	1.21752	0.312186	0.863081	-1.80928	-1.90696	-0.991859	-1.05835	-1.37048	-0.744635	-0.413713	-0.0759414	-0.639301	0.263135	0.612964	0.612964	1.6389	1.55886
858	XP_011265197.1 multidrug resistance protein homolog 49 isoform X2 [Camponotu	NA	-0.050174	0.788796	-1.9724	-1.97065	2.85662	-0.951374	-1.54786	0.98414	-0.522585	0.337932	-2.38404	-1.09779	-0.814626	-1.43406	-1.14397	0.0492316	0.13597	-1.05872	-0.743176	-1.28616	-2.49477	1.62466	3.36944	-1.96571	-2.89198	0.370472	-0.462234	-2.79128	-0.277503	-1.10406	-3.70388	-1.86988	0.314091	-0.927615	-1.24961	1.54095	-0.919011	-1.41354	0.24291	-1.77085	0.148979	-1.75913	-1.22359	0.680164	0.680164	1.56569	1.54965
669	E2ALT2	MFS domain-containing protein	-0.8398	-0.16697	-0.603936	-0.997601	0.588956	-0.779974	0.240059	-0.229646	-0.0954539	0.44768	0.267161	-1.69227	-0.788947	1.40367	-1.10354	0.48808	-1.88244	-1.4297	0.128494	-2.10103	0.0836856	-0.79818	0.264839	0.673901	0.894394	1.14338	2.51525	-2.72116	0.836051	-0.522745	-0.480187	0.544811	0.918304	1.61738	-1.31816	0.275289	-1.90217	1.15097	-1.75473	1.98514	-1.00996	-0.987072	1.59381	-0.589878	0.589878	-1.65015	-1.54805
1347	XP_025269661.1 putative glutamate synthase [NADPH] isoform X1 [Camponotus floridanus	NA	-2.97079	-1.96534	-0.185394	-2.37016	-0.446645	0.723863	0.955056	-3.70811	2.43704	-5.84248	-4.41362	-3.77472	0.554434	1.02175	0.989227	2.70858	-1.05713	-5.03767	-0.584284	-2.48117	-1.4904	-1.27736	-2.81508	-1.11143	-3.00539	-2.85452	-3.28351	-1.16438	-1.2548	-1.60031	-3.75055	-1.23135	-0.892881	-1.94958	-2.5385	-2.77367	-2.07565	-2.79651	-1.01689	-2.08341	-2.41775	-1.36059	-4.57968	0.837919	0.837919	1.48515	1.54651
972	E2B222	Sod_Cu domain-containing protein	-0.692615	-0.875066	-1.47221	-0.730598	1.22783	0.622271	-0.418599	1.13152	-1.89844	-0.482066	0.704961	6.31235	1.14195	0.647385	-0.503204	0.841644	1.76584	-1.97298	2.62259	-1.20257	-0.831927	0.566281	-3.43356	-0.10922	1.26334	-0.651985	-1.27432	-2.42994	0.503564	-1.23497	0.802165	-0.134728	0.191632	0.740634	2.42588	0.309155	-3.03831	-0.52017	-4.16966	-1.46682	-1.80934	-2.33341	-0.60401	0.810539	0.810539	1.49219	1.54439
1227	E2AB25	Cytochrome P450 4C1	-2.5156	2.08136	0.802953	-1.66487	1.40332	-0.557967	-0.504687	1.39822	-0.230258	-0.253719	0.706405	-2.16185	-0.875544	-1.27701	-0.437062	-0.712164	-0.679284	0.961755	1.223	3.31801	0.810962	0.613282	-0.577543	0.120199	-0.6446	1.31335	1.39369	-0.557488	-1.70383	-2.21624	-0.244093	0.706941	-0.0640968	-0.846522	-1.47335	-1.2454	-2.10918	0.331501	-3.21099	1.60535	-0.876866	-0.842349	-1.63783	0.647991	0.647991	1.58222	1.54328
95	E1ZWP1	Non-specific lipid-transfer protein	4.19664	2.33435	-3.39931	1.72245	-0.241972	2.52048	1.49348	1.50631	-2.01921	0.767638	-1.25411	1.76467	2.99324	-1.0413	0.199813	1.47141	-2.67164	2.98616	0.560573	2.45733	3.21025	1.58773	2.29042	1.72133	0.841827	-1.76778	-1.80211	3.43524	-2.09249	0.0517631	1.29557	-1.68575	1.50313	-2.66107	-1.83612	-0.937276	2.36432	0.826915	1.05662	0.615582	0.165872	3.28988	-1.24073	0.861694	0.861694	1.47006	1.53963
897	E2AY85	V-ATPase_H_C domain-containing protein	-1.05651	1.19779	0.588751	3.1784	-1.86175	-0.805654	-2.97633	-1.12497	-0.0781266	-3.5926	-1.15285	-1.04378	0.372728	0.238579	-3.68844	-0.791042	-2.69278	-3.16497	-2.09974	1.75581	0.789691	2.81747	0.206862	0.524969	0.406592	0.149354	-2.76743	2.15107	0.358452	1.36772	-0.119785	-0.682943	-0.828517	1.59392	-0.372608	0.670587	0.0823232	-2.01845	2.24347	-3.20377	3.55902	2.02713	-1.60816	-0.828103	0.828103	-1.4776	-1.53704
64	E1ZV01	Vacuolar protein sorting-associated protein 13A	-1.13416	0.119178	-0.24185	0.609976	1.32104	-0.572562	-0.892782	1.96999	-4.01721	-0.988202	-0.0539254	-4.94156	0.600144	3.33647	-0.724446	1.40272	-1.81825	-0.0816688	-0.596296	1.27949	-0.0135676	0.174384	0.669548	-0.273178	-1.83933	-1.13104	-2.84786	-2.38604	0.641403	0.358833	-0.931891	1.20431	0.221356	2.17756	-2.93987	-1.69669	0.666297	-1.1819	-7.61529	-0.256685	0.202937	-1.93321	-1.62528	0.85956	0.85956	1.46758	1.53686
910	XP_011266361.1 CKLF-like MARVEL transmembrane domain-contain	NA	-1.89407	-1.39547	-0.90387	1.62001	0.286021	-1.22471	1.41799	-0.400861	-2.90174	-2.46648	-4.85143	-5.05283	3.58634	-1.83167	-1.67145	0.658897	1.34994	-3.05082	-1.09672	-1.80914	-3.98056	-0.190358	-2.95637	1.61915	-0.536904	0.559038	-0.0742395	-3.58347	-2.87609	2.05894	-0.0124191	-1.54985	1.57758	0.373552	-0.600894	-0.00487522	-1.33497	-0.478478	-4.47178	1.20031	1.11499	-1.21155	0.73917	-0.875769	0.875769	-1.45969	-1.53387
391	E2AAC2	KOW domain-containing protein	1.73687	0.180586	-0.196925	1.18345	-1.68365	-1.70916	0.87405	-0.0204343	0.775837	0.126696	0.628194	-1.29825	-0.736918	0.672293	0.206057	-0.227772	-0.184085	1.61431	1.32093	0.359789	-0.14986	2.61531	-0.825243	0.863139	-0.99065	1.19705	-0.821807	-1.18728	0.504934	-0.223042	-0.592498	1.64791	-2.27463	-0.859229	0.97254	-1.43992	0.304541	-2.76837	-1.91286	-0.347552	0.93089	-0.222134	0.313549	0.574057	0.574057	1.64577	1.53186
796	E2ASU5	Chitinase-3-like protein 1	5.05326	3.88456	7.49588	5.5721	4.71694	2.94776	6.12375	6.59564	5.46473	4.13652	6.88382	7.81471	8.19604	3.16277	7.64924	4.75336	2.09179	3.05152	3.90834	5.07532	3.49813	4.07385	5.24989	7.68947	1.84757	4.95912	0.867271	3.95423	6.5647	4.39782	2.63006	2.78591	4.77332	1.89345	5.86532	3.55419	7.02024	3.67473	5.43122	0.343335	4.52862	5.80865	6.56543	0.846611	0.846611	1.4643	1.53049
1295	E2AN48	Phospholipid scramblase	-1.40268	2.16454	0.0408119	-0.64927	0.586508	2.07799	-0.404731	1.59751	-0.729007	2.17082	1.97436	1.9865	0.75733	3.32301	1.03025	2.83257	2.09853	1.45231	1.43325	2.30746	-0.645616	0.374864	4.55606	0.299148	2.51326	-1.57541	0.489021	1.49995	4.41307	4.18465	-0.656712	3.05807	0.0268947	1.36519	3.9374	0.726428	3.757	3.09489	4.05747	1.17929	4.68767	4.24914	-0.497821	-0.782457	0.782457	-1.48573	-1.52963
346	E2A8N7	Cytochrome b5 heme-binding domain-containing protein	-1.32682	-0.567475	0.447729	-2.18903	0.55141	-0.517599	2.61387	-0.812387	0.714899	-1.22908	-2.30404	-1.86886	-1.46522	-0.379076	2.91303	0.779544	0.823799	0.266181	-0.851554	-2.55083	-1.57571	-0.438837	-1.08673	1.64151	-1.20286	1.30233	2.38345	3.38351	0.911781	-0.786569	-0.900572	-0.323116	-0.42861	-0.0970938	0.294917	-0.316184	-0.0831339	-0.899392	2.68179	0.0150733	1.04581	-2.08303	-1.70833	-0.678642	0.678642	-1.53533	-1.52578
1122	E2AU99	RF_PROK_I domain-containing protein	0.908469	0.229132	-1.46151	0.0190994	-2.44421	-2.43427	-2.27937	-0.639082	-0.55093	-0.173289	-0.53971	-5.018	-0.290462	-1.72748	1.25383	-0.815375	-2.13667	0.630776	0.297634	-2.32892	-1.12748	0.222214	-0.337232	0.252136	-0.416857	2.77732	-0.498298	-2.01518	-2.25027	0.0427694	0.814391	-0.899151	-3.28591	0.00216823	-0.236301	0.43161	-0.163957	-2.48797	-2.00295	0.717747	0.302102	0.283926	6.48131	-0.794295	0.794295	-1.47402	-1.52354
494	E2AE35	Cytochrome P450 6k1	-0.966794	0.0318177	0.885973	-0.0274694	-0.903835	1.06774	-1.44358	-0.874933	0.395835	2.03057	1.34139	-1.01486	-1.60977	-1.47761	0.253038	0.678595	1.92156	1.78871	0.904476	0.600316	-3.5405	1.14922	0.385695	-0.481358	-0.489716	0.181743	0.0507878	1.0246	-0.0440436	1.05781	0.409584	1.33659	-1.05456	-0.417359	-0.186891	0.0940737	-1.09019	-1.33144	-2.58448	-2.18123	-1.64378	-5.1884	0.503527	0.670241	0.670241	1.53248	1.5192
142	E1ZYX6	Uncharacterized protein	-0.995316	0.508219	1.69466	-1.5436	0.835313	-1.26438	-0.471947	-0.256685	-0.403488	-0.934264	-1.51496	-1.81627	-2.40778	0.260059	-2.64429	1.89858	-1.20418	-0.484119	-1.44144	1.48783	1.16859	-2.05095	-0.807588	0.637201	-0.464077	-1.58057	1.09947	-3.30164	-0.73833	2.22767	1.27997	-0.727028	-2.42448	-0.545481	-0.0943337	1.06384	-0.823484	0.174374	2.22757	-0.142979	1.0847	1.39241	2.07444	-0.65957	0.65957	-1.53723	-1.51698
68	E1ZV39	MFS domain-containing protein	1.47778	0.939135	-1.26187	0.0181474	0.237526	0.426692	-1.50707	0.732425	0.12445	-1.98395	1.73213	1.11674	3.23378	1.41297	2.08067	-1.14409	1.80556	-2.05189	2.17845	2.27575	0.263529	1.22879	-1.30101	0.283716	2.2615	-1.43339	0.587231	-0.665156	0.232574	-0.233134	-0.393451	-0.38738	1.58519	1.64607	0.840801	-2.07874	0.781734	-1.77766	-3.455	0.438145	-1.08133	1.2803	-1.47239	0.675264	0.675264	1.51201	1.50617
304	E2A6L5	ZZ-type domain-containing protein	-1.30138	-0.535941	0.692922	-1.22244	-0.682974	-0.169061	0.990168	-0.957128	0.62645	3.65696	-1.91823	-1.83974	-0.512433	-1.01591	0.350852	-1.73683	0.85185	2.0789	0.0814937	-1.38467	-1.25013	1.99172	-0.702341	-0.580359	-2.15494	1.32924	-1.06214	-3.06546	-1.01598	1.29654	-1.13747	-2.32298	-1.66454	-2.07723	0.515059	0.315114	1.30295	-0.691485	-1.94697	-2.14506	-1.07467	0.445764	-0.514998	0.642573	0.642573	1.53309	1.5042
150	E1ZZ76	PDGF_2 domain-containing protein	-1.11689	0.137569	-1.3297	0.773805	-0.300062	2.59781	0.392478	2.33396	-0.0463812	-2.80276	-0.388869	0.441348	0.591152	0.384586	1.33409	1.71633	-0.559179	-0.181636	-0.135935	-0.01151	1.23918	0.0834663	1.16715	-2.04565	0.823658	-1.20686	-0.935106	-1.46069	-1.17858	-1.43463	-0.175878	2.11595	0.955232	-1.65183	1.55655	0.164826	-0.957747	2.11878	1.60284	-1.09233	-2.5413	-0.893569	-0.566043	0.614901	0.614901	1.55212	1.50062
906	E2AYL9	Tr-type G domain-containing protein	0.160704	1.35282	0.610448	-2.67375	-1.06267	1.17324	-0.935492	-0.470273	-0.207553	2.05775	-2.20391	-0.783536	2.25796	-0.71977	-0.988804	1.09424	0.587832	0.662071	2.03696	-1.25497	-0.440117	0.409253	-1.19462	-1.91788	0.0556581	0.428618	0.457362	-1.21702	-0.403875	-1.41705	-2.97011	-0.87592	-1.69057	0.406336	1.7557	-0.785389	-1.19656	0.131043	-4.66573	2.56346	-0.973956	0.0821753	-1.63241	0.670168	0.670168	1.50788	1.5004
103	E1ZX4	NA	-1.11959	0.207862	0.33152	-0.421269	0.183876	-0.818269	2.00438	2.64568	0.235852	1.95555	0.493313	-3.48214	0.35608	0.854598	-0.114021	1.4273	0.402613	-0.810657	-1.28474	-0.0152857	-1.90087	1.11817	-2.23103	-2.51279	-0.590475	-1.06785	1.7752	-4.3382	-1.02521	-2.34581	-2.01964	0.963449	-1.25659	0.137254	0.157979	2.06497	-2.4204	-0.0833898	-3.55832	0.0453436	-0.315211	0.995031	1.10371	0.715371	0.715371	1.47895	1.49858
119	E1ZXT4	Acetyl-coenzyme A synthetase	1.33625	-0.598826	-0.0522714	-0.517681	0.380511	0.0958664	-2.99279	-0.570994	0.20849	0.0935045	1.35633	-0.156443	-0.0360555	0.421458	0.418286	1.69986	-0.518352	-0.168803	1.60016	-1.70107	0.92256	-0.51515	-0.144808	-0.723418	1.44067	-0.763697	-0.0884785	-3.153	1.29007	0.463498	-0.0652048	-2.2877	-1.68332	-0.0833169	-0.905748	0.953974	-1.05673	1.08741	-2.53525	-0.0193379	-0.139629	-0.0145749	-2.89182	0.583129	0.583129	1.58229	1.4984
1299	XP_025267239.1 actin-interacting protein 1 isoform X1 [Camponotus floridanus]	NA	-0.448084	-2.77602	2.12628	0.794858	0.145609	-1.52549	2.20547	-1.04505	-0.91546	0.131291	0.146522	0.284498	-0.163443	0.829023	0.487707	0.990107	0.173574	-1.79691	0.703088	-0.0643472	0.911622	1.55014	-1.18282	2.0719	2.08232	-0.408989	1.99135	-3.04447	-0.911219	0.149514	-2.4045	-2.56034	0.95974	-0.35875	-2.05222	-1.69113	-1.18556	-1.69377	-2.43738	-0.660515	1.67732	-2.20843	0.6615	0.669102	0.669102	1.49863	1.49274
688	E2AMU0	Solute carrier family 41 member 1	0.515706	-2.81531	0.25232	1.92251	0.257272	-0.867203	-1.79152	0.288861	-0.427133	1.33835	-1.18766	-2.46342	-2.9671	1.05901	1.09344	1.15258	-0.267471	-2.06123	0.370439	-1.69021	-3.17416	0.200604	-1.43026	-1.16236	0.132335	-0.272943	-1.23364	0.209507	-0.137756	-0.127701	0.774464	2.7344	1.49921	0.0230396	0.681258	-2.63936	0.958106	-0.131843	0.493169	-1.74365	1.37514	-1.96101	3.00303	-0.675477	0.675477	-1.49196	-1.49077
1373	XP_025271294.1 protein Malvolio isoform X2 [Camponotus floridanus]	NA	-0.387621	-0.733634	0.492006	0.308782	1.26372	-0.663056	0.211085	1.99084	-0.474432	-1.9803	0.200987	-2.11954	-1.32101	-1.23345	-0.710702	0.198529	-0.817214	-1.92381	-2.6168	0.832736	3.76097	0.366398	0.692704	-3.96196	-0.970348	-1.11663	0.943686	-1.9908	-1.73938	-1.39087	0.0737245	0.250662	-0.703586	-0.127398	-0.525918	1.59107	-2.38822	-0.960496	-0.000857651	0.286569	-0.895503	-1.2637	-1.75434	0.629485	0.629485	1.52527	1.49068
241	E2A3I4	Uncharacterized protein	-1.25768	-0.257164	0.15544	-0.479094	3.01036	0.0116944	0.860891	-1.35873	-0.994726	-2.36757	1.91796	-1.64567	1.36682	0.319816	0.99569	1.50602	-0.232944	0.506399	1.00087	0.642676	-0.910576	0	-0.324147	0.129178	-0.642379	0.883715	0.650898	-1.92727	1.72235	-1.5956	-1.58175	0.768213	0.00257164	1.51748	-0.927941	-1.45541	-2.26768	-1.40257	0.169964	-1.34648	-0.884916	-0.747853	-0.495832	0.578797	0.578797	1.57166	1.48801
476	E2ADF6	Peritrophin-1	-1.64088	-0.0656324	0.168787	-0.6002	-1.07424	-0.382346	0.410148	0.724257	-0.605259	-0.85586	-1.97464	-0.879382	0.975573	0.417761	-2.13985	0.342652	-0.207465	-0.64027	0.184308	-0.78625	2.73402	0.886431	0.437139	-0.469772	0.89764	1.56042	-0.166081	-1.72084	0.244331	0	-3.89706	-1.3665	1.22228	-0.572342	-1.92967	0.790056	-0.706833	-2.16894	-2.89413	-1.76374	-1.14959	-1.52751	-0.159239	0.590128	0.590128	1.55735	1.48697
1139	E2AWT0	Probable alpha-ketoglutarate-dependent hypophosphite dioxygenase	-2.78399	-1.18008	-0.403978	0.288746	0.226939	-1.26319	-0.9875	-1.59148	-1.07195	-2.41104	-0.766081	2.93318	-1.4108	-0.5196	-0.407416	0.246074	0.375899	-0.159329	-0.854227	0.946693	0.171741	0.656279	-0.626031	0.286926	0.804264	-1.20644	-0.240198	-0.308102	-0.348621	1.33565	1.30465	-0.358832	0.246176	-0.821596	-3.07704	1.52463	-0.0927135	-1.27687	2.82419	0.287022	1.9271	-0.0898848	-0.187319	-0.587135	0.587135	-1.55304	-1.48186
206	E2A1I8	LRRCT domain-containing protein	2.57312	1.37048	-0.076524	-2.00722	-0.274631	-0.863178	-0.798141	0.739946	2.62132	-2.15184	1.15965	0.864449	3.92986	-0.714384	0.560882	-1.08441	2.06169	1.42899	-0.649681	2.66329	-2.36806	-0.831601	1.1281	0.510874	-2.54013	0.95638	0.397242	-0.978311	-1.04148	0.670123	-1.08475	-0.952005	0.487758	0.344688	1.43945	-2.15603	-0.262122	0.00427712	-3.32296	0.894335	0.0951915	1.66075	-0.843927	0.689601	0.689601	1.47093	1.48091
611	E2AJB5	Ribokinase	0.0491178	-1.62049	-0.608409	0.703218	-1.01779	-0.254534	0.229878	-3.20643	-0.313379	0.194865	0.116517	5.14574	0.00960716	-1.58955	1.47715	-1.15945	-0.914594	1.30945	-0.831212	0.229506	0.278261	-1.24868	-1.78027	1.88116	-0.0516107	-0.367639	-1.46852	3.21356	-1.01322	0.410805	0.163759	1.17587	-0.287033	-2.47004	-0.653072	0.414016	-0.225757	0.7634	3.7224	1.30206	2.88259	0.509111	-0.123776	-0.697663	0.697663	-1.45934	-1.4752
1028	E2A6E2	Protein G12	4.18515	-0.260986	4.01336	2.60151	5.39583	1.26734	0.285509	-0.00336827	1.58916	-0.438717	1.67546	4.86698	5.9822	0.744256	-1.35574	1.71943	-1.48863	0.0999638	-2.1523	3.06728	2.01145	4.1234	0.853316	2.97579	-1.25511	-2.20916	-0.41724	6.90569	3.21853	0.014086	4.36694	-1.81728	0.0542487	-1.90236	5.20788	2.11277	7.03095	5.88119	10.2907	4.56747	1.45419	7.27771	4.39776	-1.22157	1.22157	-1.3456	-1.47333
709	E2AP75	Phosphoglycerate mutase	-2.4302	-2.46256	-1.18861	-0.793473	-1.52676	-0.154757	-0.92647	1.37385	-1.64197	0.143762	-1.24183	-2.69017	-3.21663	-0.83511	-2.28625	-0.349592	0.155561	-1.27715	-2.14115	-1.6689	1.69887	1.31816	0.820374	0.9913	0.662267	0.363174	0.107804	1.27007	-0.581321	-0.282751	-2.77792	0.681239	-0.221943	-1.55562	-0.96112	0.148812	-0.776773	-0.227543	0	-1.31611	-0.247449	-1.83339	-0.480702	-0.575101	0.575101	-1.55084	-1.47136
841	E2AVK0	Uncharacterized protein	0.0991205	6.55323	2.12899	5.03746	0.618491	2.2637	-0.202558	3.14589	1.35959	-0.548518	3.78838	3.46365	2.16128	1.29751	3.20562	-0.00520444	-2.24576	0.121102	1.6205	2.12581	0.802132	3.84622	0.334722	2.9674	-0.733677	2.35121	-1.25943	0.433244	2.7405	-2.01101	2.0712	0.617861	-1.72586	-0.262044	1.90577	0.517408	3.92944	0.519843	0.432109	2.20788	-1.55046	4.52496	1.32057	0.831518	0.831518	1.39707	1.46641
1029	E2A6S4	Rap-GAP domain-containing protein	1.98253	2.37664	1.42499	-1.268	-2.56558	1.60419	0.366208	-0.116033	-2.7019	1.3921	-0.0866881	-3.14241	-1.11333	-0.800517	0.1284	1.20795	-3.16251	0.00473652	-0.0543768	0.851361	1.04976	-1.0285	2.41284	-1.79824	-2.08701	-2.67367	-0.31626	0.216928	-0.959717	3.1413	-1.26802	2.99408	1.52893	1.57081	1.9422	2.25099	0.0172227	2.55348	-1.98021	3.0315	2.57074	1.61561	2.28062	-0.785397	0.785397	-1.40591	-1.46172
430	E2ABQ3	Insulin-like growth factor-binding protein complex acid labile chain	-0.931757	-1.33067	-0.853334	0.699535	-1.73163	-2.14686	-0.348315	1.46027	-0.956257	0.379955	0.509195	-1.46687	-0.304552	-1.06664	0.743831	-0.0282496	-0.194399	0.0072883	3.11443	-0.122043	0.783601	-0.918032	-0.577374	-1.32722	-0.709467	0.945727	2.23854	-2.53577	-2.15431	-0.123114	-0.948576	-1.55822	0.0481927	-1.05865	-1.35282	-0.0175233	-0.487383	-0.733132	-3.94542	4.61e-05	0.302123	-2.64604	-0.258488	0.586559	0.586559	1.52341	1.46124
751	E2ARB0	Myosin light chain kinase, smooth muscle	-1.22951	-4.71849	1.79859	-2.55368	-1.15699	-0.190112	-5.52211	0.207644	1.87275	-0.053091	1.01265	-1.33479	-3.19987	0.511062	2.37185	-1.96942	0.20267	-1.3113	0.399707	-5.67647	-3.13252	-1.84042	-5.30417	-4.51687	-5.4298	-2.23006	-4.97201	-0.967908	-0.425995	-2.00442	-4.80899	-4.73963	-4.91854	-0.495904	-0.650023	-4.63843	-1.5729	-0.084841	-2.67593	-4.35655	0.989451	-1.42585	3.24374	0.994247	0.994247	1.3559	1.45901
1282	XP_025265221.1 myosin-IB isoform X1 [Camponotus floridanus]	NA	-2.14968	2.8792	0.764107	-2.18006	0.730996	0.243518	0.281507	0.287086	0.0466982	-5.25601	-1.00428	-1.37016	1.94637	0.00625244	-6.68803	-0.036058	-4.58392	-1.10714	1.39148	-0.674671	0.271899	-4.12382	4.46442	-0.24251	-0.236977	-3.29344	0.802467	2.83084	-0.987484	0.597614	-0.544395	-0.69814	-1.6628	-0.508963	1.44901	0.128324	1.76031	0.668081	6.30567	-1.47416	-1.77394	2.0468	0.444133	-0.970102	0.970102	-1.34831	-1.44808
1257	E2AUB3	Proclotting enzyme	-0.155147	-0.727798	-0.899546	-1.8936	2.39945	-1.7483	-0.17731	-1.16734	-0.0425106	1.02522	1.31431	-2.73974	-0.510641	1.34832	-1.42082	-0.390946	-3.40158	2.48231	3.01339	-3.8084	-0.0707228	0.318768	-0.237534	0.35346	-1.17432	-0.541766	-0.501417	-1.0355	0.271045	-0.199982	-2.98118	-0.816865	-0.590798	-1.78626	-0.477499	-2.11018	-0.133791	-1.1423	-2.39422	-0.00325555	-3.35091	-1.6929	0.577312	0.660907	0.660907	1.44494	1.44704
960	E2B1E5	Fibrillin-2	-0.491125	-1.26133	1.11718	-3.66399	-1.10303	-0.446318	-0.758281	0.634069	-0.870904	1.98096	0.216043	-2.28179	-1.67183	0.655611	-2.30494	0.451391	0.60934	0.0810471	-0.419627	2.3702	2.13702	1.10892	0.0293611	-3.16184	0.723756	2.28589	-0.378505	-1.98426	-0.495665	-2.51304	-0.187961	-0.929323	-2.06032	0.368301	-0.574487	0.760694	0.0601893	-0.293022	-6.66914	-1.60919	0.76907	-0.544644	-1.41828	0.723807	0.723807	1.40995	1.44501
594	XP_025270459.1 sodium-independent sulfate anion transporter isofor	NA	0.0337133	-1.14542	-0.525294	0.0949969	-0.157955	-0.495482	-0.622919	1.07914	0.374855	-1.43313	-2.21864	-0.777774	0.406583	0.850156	1.46417	0.137148	-0.700285	-1.43217	-0.124307	-1.17336	-1.8469	0.710008	-2.29532	1.61662	-0.786331	-0.950511	-1.29247	-2.32095	0.516516	1.01491	1.30671	0.666833	0.776761	0.141921	1.56704	-1.27397	0.888385	0.701401	-0.371112	-0.43066	0.207817	-0.256503	-0.0765412	-0.508301	0.508301	-1.60367	-1.44393
550	E2AGG5	FERM domain-containing protein	-1.79014	2.01124	-2.23232	2.93634	1.33902	0.449766	-0.131518	2.01024	0.0801301	-1.93185	-0.763134	0.629254	0.902368	-1.01581	-1.86457	0.494035	-0.810462	-2.30582	1.29688	0.0851979	0.410818	-1.11365	-0.569729	-1.5555	-1.58311	-2.16735	-1.12788	1.60978	-0.798106	-0.0257216	-1.53244	-0.793082	-0.858648	-0.556477	-1.5619	-0.188793	-1.15284	-3.08491	3.71726	-2.21923	-1.11038	1.21304	-0.917736	0.6528	0.6528	1.44595	1.44389
1281	E2AL32	BRO1 domain-containing protein	1.21057	-0.462172	-1.46489	-4.3231	-0.23881	0.271306	-1.46256	0.438045	-0.0523683	0.751456	-1.45756	-0.245289	-1.30398	-0.364572	-2.66036	-3.14774	-1.27536	-0.932996	-1.20938	1.20466	-1.126	1.21446	1.4473	-1.37318	1.13745	-1.61157	1.46675	-1.71466	0.842924	2.5232	-4.48581	-0.109274	-0.476868	1.11986	-0.947059	-0.174852	0.359772	0.736611	3.73223	-0.332222	-1.21908	0.292535	0.897218	-0.693604	0.693604	-1.42222	-1.44345
884	E2AXN0	Protein yellow	0.146606	-1.24605	-0.832719	0.398781	1.55214	-2.00905	1.11342	-1.18177	-1.13407	0.413097	0.510273	-2.07195	-1.24532	0.673607	-1.97231	0.349348	0.71008	-0.521008	-0.0608806	0.597033	-0.139565	-0.775555	0.632236	-0.130989	0.582328	1.11943	0.626973	-3.44201	0.973147	1.37524	-0.960414	-0.324214	5.63638	-0.410501	5.91372	1.66518	-1.69792	3.41976	-4.50016	0.668777	-0.465443	-2.65105	4.01477	-0.835591	0.835591	-1.36816	-1.44122
252	E2A429	Rieske domain-containing protein	1.92214	-2.12097	0.0433155	-1.85839	-2.16549	-0.215262	-0.874155	1.97375	-1.88144	0.316903	-2.05912	-2.0149	0.729594	0.278596	-2.11658	0.0666826	0.536733	0.804276	-4.60285	1.5382	-0.925918	0.315719	0.762318	-0.698592	-0.515177	-0.543769	0.214279	1.39853	0.764031	0.747538	-2.60376	-1.26354	-0.143322	-0.638334	-0.563717	-0.861979	3.74174	-1.27221	3.40591	0.00345321	-0.754787	1.28404	2.17452	-0.69578	0.69578	-1.41679	-1.43991
677	E2AMC1	Sidoreflexin	-0.790593	2.2553	-0.0305084	-2.10488	0.744611	0.335755	0.235907	-0.196336	-1.81352	-1.79895	-0.206515	-3.58796	-1.16806	-0.697723	-0.197532	0.773474	-0.0560993	0.517905	0.222541	-1.71593	-0.899716	2.51644	1.06716	0.406051	-0.784321	0.221957	1.01535	-0.454048	1.50287	-0.290078	1.53937	-1.05689	0.249802	1.00548	-0.804935	-0.244926	2.12414	-0.396809	-1.10321	-0.116413	0.603599	-0.201211	2.47016	-0.571046	0.571046	-1.50726	-1.43907
292	XP_019882320.1 ATP-binding cassette sub-family G member 4 isoform X1 [	NA	-0.318656	0.242028	-0.515272	-0.750069	-0.593361	1.16242	1.38959	0.0679605	0.926313	1.34904	0.416508	-2.57553	-0.727223	0.851598	-0.0037475	1.03634	-0.633359	2.2218	2.69695	-2.10673	-2.65207	2.26965	-1.79102	-0.355791	0.376405	2.40953	0.0113495	-1.32999	0.732266	0.389834	1.13499	-0.958004	-2.19261	-1.11297	-0.896913	-1.06836	-2.32101	-0.129786	-2.03704	-1.62372	-2.31014	-0.0377627	0.585882	0.622046	0.622046	1.46059	1.43874
1040	E2A8Y7	Chitin synthase 8	0.64329	0.446852	-1.03603	-1.07469	0.00968522	0.667196	-2.11974	-2.27245	-1.86554	2.14968	-0.521077	-1.11912	-0.625415	0.92183	-0.272929	0.671663	1.58978	-0.219875	0.576944	-0.866687	0.0352024	0.120453	3.06474	-0.414813	1.84303	-2.23186	1.61624	0.458156	-1.06173	0.527979	-0.991156	0.314641	0.471771	-0.19673	-0.774528	-4.9759	-1.99923	-0.0613786	-2.47643	-0.599014	-2.55229	-0.788885	0.208061	0.636541	0.636541	1.44475	1.43469
949	E2B0Z2	SH3 domain-containing protein	-0.107911	-3.34035	-1.62939	-0.280203	1.31101	-0.000686257	-0.119259	-0.191667	1.48531	0.584542	0.20162	-3.81162	0.371232	-0.166407	3.13487	-3.34629	0.413251	2.51769	-0.801349	-3.05392	-5.21436	0.116295	-1.88029	-1.05582	-0.271315	0.302825	-0.463459	-3.23955	-2.21026	-0.435167	-5.17824	0.624207	0.169648	-1.49325	-1.8315	0.712676	-2.31317	-0.831814	-3.32706	-1.75184	-0.6368	-2.96091	-1.21718	0.770055	0.770055	1.38	1.43452
238	E2A3F2	HATPase_c domain-containing protein	3.4191	2.80791	0.59958	3.00013	0.51366	-0.469869	1.39766	1.13654	-1.12853	-0.0286548	-1.75642	2.12814	2.49787	0.23442	1.76208	-1.86889	-3.66501	-0.0336641	-1.0948	-0.1373	2.36457	-2.13094	0.776711	1.96261	-2.30259	0.252155	-4.25212	1.41412	-0.933703	-0.334371	-1.75902	-1.25965	1.5075	-1.03056	0.29389	-2.33755	1.99845	-1.9433	1.46092	-0.0727161	-0.496911	2.12811	-0.502759	0.759256	0.759256	1.38371	1.4345
561	E2AH15	Circadian clock-controlled protein	-0.476432	1.37758	1.34478	-1.77312	1.98263	0.35041	0.197043	0.323004	-2.66512	-1.35872	-0.36678	4.10085	-1.50625	-0.484798	0.358103	-1.77127	0.442588	0.0429708	0.607703	0.827751	-1.1403	-1.28906	-0.733667	-0.0173689	0.340615	-1.20018	-0.734982	-3.95082	-2.85749	-1.07382	-1.05009	-0.993218	-0.745643	-1.61809	2.31255	-0.789256	-0.241369	1.90007	0.274984	-1.41254	-0.940206	-0.750639	-0.431296	0.628934	0.628934	1.44193	1.42852
205	E2A1H1	BRO1 domain-containing protein	-0.84535	-0.188911	1.51826	-1.8459	-1.35333	0.432154	-0.609429	0.64992	-1.74009	0.486958	0.181897	-1.9728	-0.606787	-0.841816	-1.23169	-1.19762	0.0398087	0.966356	0.722371	0.776187	1.17631	-1.43071	-0.150984	-0.937871	-0.867183	0.741957	-0.0557135	-2.18997	0.821218	-0.73108	0.968045	1.67003	-0.126455	1.97631	-1.53655	1.83581	0.951653	-0.912265	-0.089761	1.27835	1.75348	-1.30427	1.33987	-0.536463	0.536463	-1.5246	-1.4231
928	E2AZE9	EH domain-containing protein 1	2.92093	-1.35906	1.33367	-2.01165	0.17516	0.0373906	0.805365	-0.368717	0.884543	1.35713	-0.0785088	0.128784	-1.75309	-1.08805	1.54249	-3.77206	2.11849	-1.56001	-1.31788	0.142849	-1.86493	1.46549	-2.74318	-0.753939	-2.43659	-0.362463	-4.31248	-1.16386	-0.313705	0.156423	-5.56462	0.563008	-0.283277	-0.618385	1.83086	-5.50502	-1.63357	0.373592	0.130978	-0.260835	-0.352825	-1.62732	2.18156	0.780021	0.780021	1.36177	1.42133
1201	E1ZWT7	Chymotrypsin-2	-0.371464	-0.653664	-0.747968	-1.21779	-1.86105	0.798245	-0.432872	0.454269	-0.599629	-0.343991	-0.229841	-0.903787	-0.322405	-0.320395	0.444253	1.41999	0.414531	-2.3868	0.0377526	0.666577	-0.584517	0.636444	-1.23889	-1.03493	1.44641	-0.599359	1.17988	1.28827	-1.39453	1.18025	1.54509	-1.15026	1.90666	-1.45596	0.507111	1.40929	0.238004	-1.17256	1.81522	-0.285632	0.19293	-1.17191	-0.793281	-0.501796	0.501796	-1.56792	-1.41675
689	E2AMU9	M20_dimer domain-containing protein	1.28945	-0.756336	0.739463	-2.38871	-2.40068	-4.60182	-3.7194	-0.707428	-0.570191	-0.788708	-0.856537	4.58061	-0.842018	-1.02384	-2.31131	-1.28197	0.298342	-2.87934	0.680867	0.334692	-1.69701	1.33232	-0.480852	-2.2204	0.608834	-1.48995	-2.67392	3.97597	-2.89152	0.385063	-0.0753799	-0.409491	-0.440477	0.0176919	1.0994	-1.36813	-0.259295	-0.359595	3.06975	-0.422655	1.39067	1.76069	-0.114817	-0.763923	0.763923	-1.36133	-1.41638
633	E2AK04	Protein CREG1	6.11283	3.48371	4.03204	2.75651	4.15049	-0.420401	0.0585759	0.0875517	1.67866	0.728839	4.09463	4.82642	6.37175	2.13552	2.65385	2.49372	-0.238651	3.28506	0.669659	4.09066	4.42418	-0.694794	3.90173	3.0358	0.112188	0.240459	3.06088	4.76985	3.40948	1.98453	4.46553	4.55832	2.47118	3.50958	5.80914	3.08084	5.47833	3.94242	5.38677	0.475495	3.7269	4.83274	4.23677	-0.79099	0.79099	-1.35283	-1.41633
935	E2AZT4	Solute carrier family 15 member 1	0.601772	2.25343	-0.243613	-2.48977	-0.10117	-1.44549	0.523916	-1.07355	-2.11248	-1.01316	0.152824	2.06038	1.4173	0.475784	1.47401	0.425548	0.368593	-1.07818	-1.50556	-1.80846	0.141767	-0.226172	3.75905	1.50092	-0.931967	-1.23319	0.416374	2.01768	-1.57505	0.475882	-0.822652	1.62144	1.12753	1.12711	0.790385	0.958336	0.784517	1.61092	5.03656	-0.749171	0.254517	0.762367	0.176983	-0.643267	0.643267	-1.41625	-1.41613
602	E2AJ49	Sodium/potassium-transporting ATPase subunit beta-2	-2.44572	-1.5306	-1.01743	-0.957893	0.538394	0.60553	0.538862	0.320893	0.250455	1.06134	-0.855502	-0.869909	1.45903	-2.10226	-0.747475	-1.53032	-1.43516	-0.305319	2.19676	0.858646	1.33733	-0.493899	-0.321071	-1.49478	0.629237	1.05669	-0.614446	-0.759583	-0.137345	-0.621448	2.54586	-0.283148	-2.11392	-1.32133	-0.773781	-1.23554	-1.24338	0.177052	-5.40902	-1.08823	-0.485156	-1.36245	-2.30999	0.605483	0.605483	1.44243	1.41578
742	E2AQV0	Nucleoside diphosphate kinase	1.83323	-0.831044	1.50831	0.891107	-0.927931	-0.966955	-2.66602	-0.025171	-0.956883	-1.80948	-1.47259	6.77347	-1.73624	0.601789	2.40202	-0.308936	0.546677	-2.08441	-1.05463	-1.58999	-0.904245	-0.727618	-1.17712	0.835309	-0.326054	-1.05136	0.502584	6.76043	-1.35493	0.193448	0.918084	1.55187	-2.81587	-1.16734	-0.584753	1.27927	3.28801	-0.781813	3.99767	0.988694	0.912891	1.45711	-1.68795	-0.849358	0.849358	-1.33449	-1.41338
962	E2B1I4	PXMP2/4 family protein 3	-0.441433	-1.57075	-2.21726	-1.79254	-0.88522	0.683218	0.322403	2.08603	-1.32106	0.498834	2.17289	-1.39667	-1.14615	-0.068781	0.0233364	-0.795668	-1.30257	-2.41798	1.36272	-1.0784	0.00465916	0.395327	-2.22199	-0.832053	-2.53408	-1.3685	0.239857	-1.61409	-0.0224189	-1.75879	-1.46137	-0.300359	0.430936	0.219107	0.664233	-0.362202	-2.76065	-2.47362	-2.8006	-1.47162	-2.31718	0.778914	-1.1805	0.563334	0.563334	1.47003	1.40814
1353	XP_025269799.1 serpin B6 isoform X4 [Camponotus floridanus]	NA	-1.72367	-2.04636	2.64155	0.0637373	-0.890459	0.694637	0.749141	0.274146	-0.049747	-0.0144964	2.5919	2.41381	1.47913	-0.327379	3.00216	-0.184636	2.51365	-0.523463	-0.347287	1.64415	-1.31394	-1.06401	2.41949	0.921929	-2.12403	0.571189	-1.05827	-0.827846	-0.344485	0.630822	1.59654	-0.202984	0.137125	0.730974	-0.0351677	-0.172961	-0.826115	-0.0921503	-0.78478	-0.654934	0.0280501	-0.0752115	1.58691	0.571599	0.571599	1.46028	1.40717
553	E2AGJ7	Beta-glucuronidase	-1.57767	-0.686096	-1.18777	-0.80706	-0.44309	-0.992706	0.0739557	-1.13535	0.524535	-1.71164	-1.71642	2.55672	0.480278	-0.279882	-0.0253699	1.57724	2.08637	-2.44315	-0.241102	-0.47266	0.721474	-2.04943	0.140013	1.59288	1.66529	0.496476	-0.856741	4.63334	0.00881004	1.60139	-1.8223	-0.231105	-0.515169	1.48343	1.20605	1.83148	-0.183762	-0.9745	-4.46179	1.3651	1.50716	-0.254131	-1.38128	-0.666349	0.666349	-1.38498	-1.40185
202	E2A1C6	60S ribosomal protein L34	3.03146	2.94947	0.256001	3.35119	1.53335	7.04985	1.15807	6.11936	-0.603182	-0.758209	1.52473	0.839362	5.77248	2.28016	0.828978	0.67453	-0.735992	2.76745	-1.55291	1.62814	3.38356	0.33695	-0.0742729	2.69371	1.09757	-1.52869	0.329287	3.85592	2.97366	-1.91191	3.92232	-1.33531	-0.0457587	0.413976	0.490921	-0.209248	3.08968	-2.35234	2.23171	1.16523	1.3609	3.08661	-0.0190499	0.850215	0.850215	1.31728	1.3976
714	E2APC4	Myosin-IA	-2.11604	1.96534	-1.51668	-3.31829	-0.36779	-0.158426	-3.62676	1.5253	1.42093	-0.831438	-0.092774	-0.575865	-2.23944	0.915538	-1.31871	1.33437	-0.601313	1.08664	-0.52386	1.68805	-1.03625	-0.590784	2.678	-2.42271	-0.999025	1.11303	1.03379	-0.784713	1.82463	1.51566	-1.52935	2.58789	1.82094	-0.346546	-1.12607	0.576768	-3.17107	0.344837	4.0573	-0.619504	1.58002	1.84622	1.53735	-0.715897	0.715897	-1.35672	-1.39728
1059	E2ADE0	MFS domain-containing protein	2.88887	-0.922381	-0.0692876	0.137355	-1.07594	0.780862	-0.653886	0.471865	-0.210359	-0.346776	1.1902	1.16467	3.65592	-1.11659	-1.82937	-0.0176875	-1.86637	-1.03317	3.35918	0.292576	-0.998243	1.14528	-0.722218	-0.653152	-0.00363988	-1.51233	1.06697	1.58001	-0.98956	0.477354	-0.259678	0.741197	-1.00273	-0.656059	-0.107432	-2.67408	-1.17045	-2.02044	-1.67605	0.523228	0.52328	1.25504	-1.70487	0.596842	0.596842	1.42302	1.39644
1330	XP_025269200.1 t	NA	2.49886	2.58917	-2.05278	2.96559	-1.29004	-1.37641	-1.37349	-0.791672	-1.92889	-1.43603	0.966731	-0.958835	4.9352	-0.189171	-2.98675	-0.918109	-0.830408	1.25249	0.526734	-0.135043	1.24518	-0.521002	-1.0795	1.117	0.576002	0.403868	0.149599	2.78914	-1.42645	-0.568828	1.40757	0.304079	0.93788	-0.0681837	1.85096	1.64666	1.01527	0.0182777	-1.57029	0.142713	0.61111	2.44878	0.748638	-0.665307	0.665307	-1.37344	-1.39208
1158	XP_011267183.2 protein borderless isoform X1 [Camponotus floridanus]	NA	-0.32731	-0.370913	-0.0221215	0.183283	-0.181462	0.351053	0.469628	-1.42603	-0.578207	-0.160315	1.08003	-1.02449	-1.53619	-0.973078	0.323592	-0.498324	1.51132	-2.73154	-0.502289	0.0120299	-0.606561	-0.521461	-0.177998	-0.242519	-4.314	-0.532066	1.40963	-1.20834	-1.79762	-1.36204	-4.80533	-1.71821	-0.821405	-0.558298	2.02318	0.121697	0.294675	0.136945	-4.33513	-0.279978	-0.507862	-0.0406415	-0.0702741	0.595277	0.595277	1.41554	1.39002
1358	XP_025269812.1 serine protease inhibitor 3/4 isoform X12 [Camponotus floridanus]	NA	8.08528	7.63022	9.52745	7.37569	7.89224	4.02586	8.05787	6.54533	7.72114	8.31751	9.99748	9.04784	9.43245	6.35457	10.1192	7.96597	5.88935	7.97236	7.92261	8.50442	7.67819	6.22149	7.50957	7.88958	5.81531	8.19506	6.74113	7.15352	7.9598	6.33456	7.7343	6.77732	7.68224	3.90339	9.08632	7.90529	9.4841	7.30329	6.92437	4.97033	7.16803	8.05873	7.53888	0.585857	0.585857	1.42233	1.38937
1072	XP_011257736.2 leucine-rich repeat-containing G-protein coupled receptor 5-like [Camponotus floridanus]	NA	1.80622	2.06851	2.60242	4.01289	2.23925	-0.0884347	3.42665	0.191846	1.94928	4.42965	5.58481	7.73747	5.03331	2.65781	1.65472	3.81386	0.716408	4.13771	3.26178	4.36328	1.97922	2.29063	5.27492	5.91324	5.60527	5.60533	-0.00348226	1.78584	5.36547	6.56602	-0.00516712	6.54648	0.137822	5.36862	4.85789	4.74251	4.82845	-2.08288	4.0839	4.80923	5.54343	3.74572	5.87858	-0.871387	0.871387	-1.2946	-1.38041
572	E2AHN0	Glutaryl-CoA dehydrogenase, mitochondrial	-0.16406	-1.23501	-2.57774	1.01289	-1.01821	-2.85738	-1.90033	-1.30991	-1.18494	1.00932	-2.12502	1.26794	0.993265	-0.660497	-1.61557	-0.717451	-2.82207	-0.404822	0.416011	0.806784	-0.425561	1.88317	1.33152	-0.295864	1.73095	0.142835	2.69624	0.285413	2.06055	0.497428	-0.645928	-0.969901	0.3217	-0.250772	-0.690997	-0.264524	-1.28425	-1.92751	0.232688	-0.885685	-0.748168	-0.0692644	0.690566	-0.565955	0.565955	-1.42724	-1.38023
1047	XP_011254732.1 hexokinase type 2 isoform X1 [Camponotus floridanus]	NA	0.168751	0.633963	0.935927	-3.82889	0.255123	-2.81959	-0.885979	-2.03057	-0.273048	-0.318976	-2.99981	-1.23992	-3.49226	0.263577	0.219193	-1.52025	-0.259882	1.08054	-1.63401	0.775122	-0.432253	-0.47106	3.20061	-1.0001	1.74667	-0.768439	2.04298	2.9912	-1.51681	-0.21771	-1.42709	1.9006	0.932649	-1.08628	-0.516558	0.505106	-1.88222	-0.289758	0.119232	1.00162	-2.05391	0.212105	-0.543579	-0.645472	0.645472	-1.36862	-1.37963
1186	XP_011269361.3 uncharacterized protein LOC105259233 [Camponotus floridanus]	NA	-0.633905	-0.15546	-0.945235	-0.812527	-0.882828	-0.447807	-0.613837	1.9415	2.37236	0.367612	0.115853	-1.85596	-1.2519	-1.27278	0.405357	-0.0968758	1.12956	-1.0529	1.71599	-1.74107	0.0913617	-1.47864	-1.15586	-0.912651	0.685943	0.0978682	-5.04076	-1.60373	-1.5438	-0.593433	-5.13087	-1.28995	-0.142826	-0.000840646	0.576305	-1.56858	0.692555	-1.94	-2.36903	-0.915705	1.11848	1.81322	0.087242	0.626942	0.626942	1.3705	1.37254
116	E1ZXM8	Trifunctional enzyme subunit alpha, mitochondrial	1.14924	-0.54332	-2.26132	-0.157973	1.38728	-2.06157	0.0283413	-1.9487	0.743382	0.302761	-1.64908	-1.62099	-1.0657	-0.950545	-0.978622	0.878049	1.53999	-1.69823	0.141928	-1.59311	-0.792701	-0.567983	-1.56546	-2.04904	2.78323	-0.570837	1.73021	0.370675	0.372591	1.67741	-2.34058	-0.24415	1.61083	1.14587	0.492464	-0.358854	-0.469953	0.668186	0.809407	0.724465	-1.43683	-2.32281	-2.58283	-0.578053	0.578053	-1.40561	-1.37248
1296	XP_025266692.1 lethal(2) giant larvae protein homolog 1 isoform X3 [Campon	NA	0.65014	-1.47576	-1.86537	0.40572	0.890436	-0.53969	-3.83197	0.835954	-2.0318	1.46362	-2.08755	-1.6293	0.766644	-1.33828	-1.30167	-0.36235	-1.08517	1.22063	0.00113494	0.399386	0.997098	-0.403966	-0.267632	0.180833	-0.866883	2.35498	-1.06335	-3.62428	0.546322	-0.584987	-3.70737	-2.9278	0.927016	-3.99332	-0.697788	-1.90787	-2.07359	-0.952917	-0.755663	-2.03574	-0.778094	-2.47143	2.22147	0.650099	0.650099	1.35627	1.37175
1129	E2AVF4	Citrate synthase	2.48	-0.97099	4.33936	1.30561	-1.51108	-1.06379	-0.648319	-2.44628	0.0907507	-2.97777	-2.54721	0.264416	-0.873132	1.78675	-2.2653	-1.34137	0.122814	0.28042	0.328094	-0.0873153	4.16304	-1.92387	-0.260009	2.24961	-1.68065	0.332249	1.11111	1.79939	1.98852	-0.113521	0.14444	-0.289728	0.845045	0.482556	0.955038	1.13566	-1.88816	0.0652082	-0.370916	1.83219	-0.852534	3.89476	-0.861466	-0.702211	0.702211	-1.33121	-1.37093
693	E2AN22	Uncharacterized protein	-0.161955	-0.286187	-1.30796	1.04695	-1.18316	-0.0229925	-1.54122	1.47944	-0.212621	0.566567	-0.528221	0.115148	-1.03756	1.36778	0.51811	1.75467	0.178784	2.03586	1.03184	-0.668862	-1.31615	-0.0847118	-0.789353	-1.46822	-0.962883	0.241711	-1.05816	-1.97857	-1.02901	0.782678	-0.229409	1.8816	-0.856587	0.523745	-0.235421	-0.765586	-1.32606	-0.626301	-1.68569	0.952422	0.503669	-1.22154	-0.124956	0.475615	0.475615	1.52209	1.36322
372	E2A9P4	Inosine triphosphate pyrophosphatase	-0.233495	-0.383167	-0.134312	-0.370184	0.0134825	0.137762	1.9637	0.830566	0.652006	0.205076	0.24088	0.856539	0.571993	0.173995	-1.29652	0	0.192402	-0.253178	-1.28052	-1.26841	-1.97604	-0.889475	-2.79897	0.343221	0.277437	-1.11265	0.328851	-2.94226	-0.701376	-1.76885	1.48147	-2.1181	-1.23662	-1.39715	-0.405378	0.0377667	2.23969	-2.06098	-4.72677	-3.73918	1.82371	0.700214	-1.50731	0.604828	0.604828	1.37208	1.36269
1178	XP_011268793.1 protein croquemort isoform X4 [Cam	NA	-1.06194	-3.53269	-0.104601	-1.81135	0.0922079	-0.193843	1.2614	0.685039	-1.3912	0.360987	0.359343	1.12754	-1.37807	-0.765134	-0.535533	-1.86831	0.183953	-0.637868	-0.209269	0.595478	-1.36996	1.15846	0.431531	-0.320253	-1.12795	-0.365633	1.2328	1.80033	1.23814	-0.388707	-1.05348	-1.02237	0.0402291	3.3072	0.715167	0	-0.554846	-0.574441	2.70069	-1.09941	-0.258405	-1.8546	1.00485	-0.545045	0.545045	-1.42252	-1.36257
520	E2AEM6	NA	-0.241078	-1.45864	0.140531	-2.03648	0.0659083	-1.21808	2.03489	-0.342323	0.523131	0.55416	-0.370774	-2.03512	-1.5027	1.46724	2.63778	0.82359	1.02465	0.0652484	0.473851	3.60828	-3.87837	-0.914017	-0.832594	-1.90332	-0.953484	-0.18414	-0.88173	-2.49446	0.379221	0.736492	1.87068	-0.402529	0.015883	-1.15218	0.883216	0.979944	-3.19804	-1.1884	-3.91424	0.251415	-1.45284	-0.752787	-0.684157	0.640929	0.640929	1.34854	1.36156
695	E2AN60	Beta-hexosaminidase	0.0866656	0.532662	2.6508	-3.84493	1.43754	0.850124	0.248721	1.0477	0.650342	-0.228795	1.13687	2.80373	-0.785364	-0.426304	0.321549	-1.04866	-0.262029	1.5878	-0.940529	0.225257	0.802304	0.730755	0.502177	0.954906	-1.32762	-3.66097	-3.09493	-1.75575	0.907481	0.728654	1.42056	-2.52386	-1.18224	3.09359	-0.295306	-1.99801	-0.199929	4.46135	-0.883813	-1.75994	-1.31415	-0.727537	2.34723	0.691748	0.691748	1.30842	1.34799
1108	XP_025269998.1 matrix	NA	-0.460918	-0.864909	-1.5423	-2.1044	0.915113	1.31561	-1.61124	0.996276	-1.86258	-1.65659	-0.496349	0.621806	-0.219651	-0.667698	-1.73161	0.943586	0.0747235	-1.31473	-0.78756	-1.34869	-1.83081	-0.473807	-1.09265	0.182421	1.48391	-1.90286	-1.12571	-0.812782	1.07705	-1.77222	-0.829725	-1.28623	1.25263	-0.512395	1.29955	-0.416866	0.195583	-0.48038	-2.8164	3.33517	-0.542989	0.396437	0.699115	-0.532009	0.532009	-1.41378	-1.34715
164	E1ZZY1	Protein yellow	-0.342626	-1.01559	0.550809	-0.264332	1.78348	-1.99509	-0.804027	3.13313	0.0639778	0.642657	1.93555	7.6658	0.565571	1.39662	-0.173058	0.475241	-1.01633	-0.863701	1.49358	-0.758577	0.971359	3.26035	-0.820402	0.536147	0.261995	-1.37777	-0.635824	2.88309	3.70614	-0.284886	0.0765533	1.49846	-0.756566	-0.228446	-1.64371	-2.25242	-0.251334	-2.46525	0.737117	-0.0665673	-0.818239	0.504388	0.079908	0.715487	0.715487	1.29684	1.34563
919	XP_011266577.1 leucine-rich repeat-c	NA	-3.10346	1.21226	0.678928	-1.45761	1.14643	0.0836881	-0.644941	-0.255235	0.921722	-1.69539	0.0411138	1.34572	-1.48167	0.411037	0.701417	1.52239	-1.07346	-1.11677	0.0354684	-0.766456	1.33783	-1.78931	1.10307	0.374985	-1.95157	-0.473856	-0.0710197	0.622915	1.57517	1.69894	0.170078	0.676731	0.180201	0.919036	0.490852	-0.22304	-0.267984	-1.4612	2.2499	0.338297	1.87387	-1.06521	2.40797	-0.526872	0.526872	-1.41037	-1.34102
880	E2AX84	60S ribosomal protein L18a	3.24908	-1.36823	-2.19288	2.61476	1.07078	-0.0577999	0.209196	0.17463	1.14979	1.71603	-1.31285	-1.46369	-0.926422	1.69327	-0.201053	-3.57976	-0.275495	0.0600115	-1.02662	-1.0213	0.0880125	-2.65218	-0.210382	0.386941	0.208354	-1.0298	-1.56657	2.04892	1.86712	0.49748	1.15584	-0.970274	0.79108	0.256505	-0.0367986	0.524888	2.93352	0.832561	1.18783	-1.24463	0.352567	-0.773756	0.680123	-0.590447	0.590447	-1.35298	-1.34057
768	E2ART6	Rab GDP dissociation inhibitor	-1.24752	-1.08754	-0.634162	-1.49815	0.613464	0.854848	-0.407731	-2.19411	-1.024	-2.67194	1.19524	-0.324578	-0.308227	0.670392	-1.39093	-2.62812	0.582425	-3.28608	0.37226	-1.3021	-2.29039	0.115532	-0.782169	-0.7253	1.30885	-0.768095	-2.15923	-0.256863	-0.621658	-0.828779	-0.582781	0.672467	-0.738589	-1.81841	-0.868726	1.48173	-1.16806	-0.00979433	0.408859	1.89277	-1.86983	-0.542107	1.38223	-0.521329	0.521329	-1.41408	-1.33925
597	E2AIX5	Maltase 1	10.349	8.3567	7.13463	2.67683	8.64119	4.02311	9.58731	1.62665	8.91747	9.23827	9.44219	7.58688	9.16461	9.21907	2.57547	9.01209	5.43504	9.13239	7.67246	9.98516	7.86351	7.54672	9.07746	8.77269	9.14768	10.3931	4.94378	6.01467	10.2842	9.12962	3.6212	10.684	8.74883	9.79469	9.10619	8.02115	10.2336	9.33716	6.4673	5.73914	10.3299	7.93917	10.5853	-0.887958	0.887958	-1.24805	-1.33886
502	E2AE86	Proteasome subunit alpha type	-1.24086	-0.378369	-3.46747	1.67049	-0.88261	-0.535551	-0.000169152	-0.867701	-1.03781	-1.48439	0.849992	1.12539	-1.68595	0.624327	0.355653	-0.0877369	-1.73446	-2.90641	-0.710348	0.836657	-0.110319	-0.289394	-1.27128	0.719379	0.661634	-2.33122	1.27886	2.3104	-0.817845	2.71984	-0.530256	-0.405405	0.147609	-0.232808	-0.925909	1.33697	0.971262	-1.75243	0.189777	-0.55896	-1.8556	-1.99514	0.630696	-0.553187	0.553187	-1.37993	-1.33841
409	E2AAT2	Eukaryotic translation initiation factor 3 subunit B	1.59727	3.32366	-1.34121	0.230189	-1.86884	0.59006	-2.4726	1.12961	0.447416	-1.33592	0.924286	3.26267	3.68706	-1.85309	0.918324	-0.313972	-3.93087	1.44245	-0.932776	1.14665	2.38829	-1.19568	-0.260392	0.693899	-3.22012	-1.94378	-3.11114	2.70171	0.808705	-0.949914	-0.250533	-0.118896	-2.18474	-0.953435	-1.68495	-1.44165	0.663632	0.377368	-1.21322	0.18885	-1.07565	3.03665	0.223497	0.715406	0.715406	1.2867	1.33677
1311	XP_025268060.1 UDP-glucuronosyltransferase 2B20 isoform X3 [Camponotus floridanus]	NA	-1.52775	0.591864	0.411911	0.335559	-1.52304	-0.311812	0.924494	-0.865506	0.286461	-0.349138	-2.06857	-2.16721	-1.09983	-0.643206	1.18676	-2.38601	1.02053	0.0422881	0.109615	-1.35556	-1.79469	0.615971	-0.636749	-0.808117	-0.750132	0.506859	-0.309753	2.99377	-0.431342	-0.0757763	0.331863	1.23091	0.156656	0.00290351	0.127762	1.1383	-2.52688	-0.751222	2.02717	0.54219	0.340964	-2.58251	-0.614024	-0.514594	0.514594	-1.40882	-1.33052
1310	XP_025268048.1 peroxiredoxin-6-like [Camponotus floridanus]	NA	3.14841	0.599306	-1.4253	-0.668863	-2.73818	-1.24027	-1.93085	-1.28021	-0.685426	-2.1367	6.39143	1.89186	0.652354	0.624571	0	7.13891	-0.583579	0.787794	0.605267	6.86673	-0.0861776	1.86216	7.96484	1.25851	0.854265	-0.278545	-0.442044	3.15828	5.14301	-0.467664	0.278978	1.99856	-0.0981993	-0.906113	6.71116	0.106528	5.7761	-0.696234	5.54162	-0.464976	8.12883	1.20096	9.07106	-1.17379	1.17379	-1.20892	-1.32924
124	E1ZXZ3	Hexamerin-1.1	-0.550463	-0.617075	0.994841	1.05637	1.0352	-0.408742	-0.880604	0.829432	-0.838255	0.404621	0.196569	5.26554	-1.80541	0.104301	0.492266	0.250202	0.247985	0.300336	-1.01102	-0.64061	0.292198	1.4769	-0.0692478	0.764484	-0.0486676	-1.88148	-0.138478	2.18307	1.83195	-1.28899	-1.75105	0.22686	0.100791	-1.04427	2.2851	-2.54773	-0.617383	-0.843912	-0.325716	-1.56315	-1.48455	0.237528	0.0617996	0.558508	0.558508	1.35989	1.32738
481	E2ADN0	Malate dehydrogenase	4.8726	2.13365	0.661766	1.87548	-2.21538	-0.364429	-1.65295	0.491367	0.66168	-0.51549	3.27939	8.49026	6.17541	-1.5558	-1.00036	-1.09989	-3.65553	-0.0227718	0.0835986	2.49228	0.69065	0.162271	-1.46283	4.11709	0.352272	-0.622601	-2.05715	7.45071	4.84058	0.663443	5.0829	0.227899	-0.380817	-2.17627	2.53507	-2.91099	6.24828	0.894484	4.9256	-0.145548	2.66686	6.01959	0.201254	-1.0912	1.0912	-1.21087	-1.32516
97	E1ZWR8	Transcription initiation factor IIA subunit 2	-2.16864	-0.115707	-1.15208	1.7603	-0.0338945	-0.44965	-0.261302	1.83101	-0.3981	1.95008	-1.47597	2.45092	3.94726	-1.96324	-0.298836	-3.11048	-0.110557	0.11968	-1.1306	-0.123507	-0.0845005	-1.50476	2.186	-0.212841	0.144652	-0.12211	0.703028	-2.44263	-2.12513	0.585029	0.6004	-0.273692	-2.29563	-0.507923	-0.184263	-0.593141	-1.88538	1.80365	-3.24231	-0.514622	0.910643	-1.61125	-1.10413	0.612444	0.612444	1.31725	1.32385
555	E2AGM0	Tubulin alpha chain	4.60827	4.62893	2.78529	4.3986	1.8555	1.63185	3.22826	-0.166358	0.312115	-0.71862	-0.944626	4.49326	4.78977	-1.12551	3.4582	2.69997	0.0442189	1.532	-0.225289	2.39393	3.79631	-1.19418	1.46479	3.59361	0.450672	-0.958374	0.744695	3.65419	2.8816	0.340419	1.63662	-0.186895	-0.761376	-0.937034	-0.0209141	0.300025	2.892	1.29987	2.28975	-0.421692	0.144028	4.17831	2.31246	0.730432	0.730432	1.26664	1.32339
256	E2A481	6-phosphogluconolactonase	-0.949348	1.09134	-1.02583	-0.938895	1.00889	-1.25532	2.41826	-1.2013	-0.34865	0.0681913	-1.92604	5.8136	-2.15395	-0.781377	-0.38517	0.271813	1.01275	-0.831312	-0.311811	0.793622	-0.528753	0.702705	-1.26495	0.860536	-0.264559	0.363118	-2.14628	3.1303	-0.544429	-0.21272	0.900832	0.870787	1.24832	2.64427	2.05867	0.067611	-0.384002	-1.36615	2.63393	-1.28466	1.43145	-0.509329	2.58409	-0.63546	0.63546	-1.30403	-1.32329
1065	E1ZWR0	Midasin	0.562274	1.34995	1.72721	-0.379669	-1.77743	-0.629677	-0.879311	0.061936	-0.92757	0.0865243	0.0631558	-2.44856	0.66028	0.387781	-0.170621	0.83433	0.989065	0.948549	1.35659	1.41956	-2.51899	0.550428	-0.407446	0.379977	0.751148	-1.42762	0.28468	-1.43235	-0.724271	1.12529	0.652116	1.0838	-0.191398	0.334235	-0.806366	-3.9121	-1.83637	0.0165574	-4.33363	0.857667	-0.665749	0.767036	-1.36111	0.559243	0.559243	1.35249	1.32246
165	E1ZZY3	Beta-galactosidase	-2.15228	-2.06178	-2.52949	-2.54374	-0.590276	0.468255	1.24428	0.939924	-0.0154063	0.356868	-0.525325	-2.70919	0.124412	-0.970851	-1.31364	-0.474619	0.244111	-0.94964	-0.148858	0.603903	-2.37898	-0.8048	-1.82236	0.129488	0.0877707	-0.464705	-1.36114	-2.0753	-1.1326	-1.39043	-2.40906	0.456278	-0.761672	-0.404331	0.780417	-1.89341	1.023	0.195521	0.0716976	3.67764	2.23352	-0.631501	-0.767716	-0.551195	0.551195	-1.35703	-1.32078
1312	XP_025268117.1 uncharacterized protein LOC112639167 [Camponotus floridanus]	NA	0.710317	-2.00824	-0.556794	-0.0644994	-0.933845	-2.44199	0.437018	-1.50874	-1.73548	-1.12112	1.17526	-2.96121	-0.397841	1.5406	-1.81113	-1.18123	0.864502	-2.15385	-1.64166	-0.619382	-0.0991854	-0.869498	1.08667	0.0427037	-0.0482622	-3.24017	-0.253518	2.1375	0.835744	0.788484	1.96123	1.83279	-0.56899	-0.0846197	-1.01932	1.08731	-1.29966	-0.0555205	-1.37808	-0.543733	-0.111628	0.326976	-3.38299	-0.559631	0.559631	-1.34551	-1.3176
573	XP_011258258.1 kynurenine--oxoglutarate transaminase 3 isoform X2	NA	-0.175258	-0.168569	-1.26398	-1.88076	0.112966	-0.948697	0.0566335	-1.10114	-0.771307	-2.21497	1.93794	0.996064	-1.25372	1.05006	-3.04855	-1.38322	-1.93095	-1.8978	0.555023	1.25295	0.391353	0.164955	-0.0707158	0.999773	2.09627	0.483262	2.78407	1.8846	-2.5467	-2.95724	-0.209293	-0.504463	-2.17891	0.7522	0.045974	-0.327054	0.320519	-0.240866	3.63466	0.564924	-0.29857	-1.29967	-1.19977	-0.594172	0.594172	-1.31437	-1.31288
1182	E2A149	EHN domain-containing protein	-1.57093	-2.20437	-0.457107	0.599952	-1.71188	-0.0919124	1.05723	0.261494	0.372334	-1.57539	-0.00797352	0.0611265	-0.309206	0.39172	-0.268657	-2.75326	-0.545178	-0.220662	-0.0861799	0.188563	-3.40349	0.164685	-0.481567	-1.26351	-1.26998	-0.369262	-0.0507054	3.50534	1.62212	-2.20943	1.0094	0.358184	0.498824	0.320353	-1.36209	-0.0955262	-1.06923	-1.46226	1.82301	0.819945	-0.513482	0.555724	-1.33083	-0.523248	0.523248	-1.36972	-1.31087
456	E2ACR5	Annexin	3.0124	1.59774	0.235473	1.2753	0.861778	-2.03997	-1.29409	-0.431776	-0.612724	0.295954	-0.0250148	3.79265	4.47375	0.978213	-0.464695	-0.36507	-1.96205	-1.19181	-4.63193	1.36423	1.79016	-0.665081	-0.361335	6.57731	1.23274	3.34284	-4.24925	4.2237	2.03064	-0.850655	3.19679	0.340821	0.178596	-0.777968	-0.404568	1.88049	2.36912	0.363075	1.21296	-2.49006	-0.743649	4.54217	-0.146126	-0.846575	0.846575	-1.22523	-1.31029
1160	XP_011267280.2 apoptotic chromatin condensation inducer in the nucleus iso	NA	0.598821	-8.52568	0.526385	-2.42623	-0.666	0.536664	-0.702577	-0.160037	-0.338652	0.271602	0.124218	-1.85688	-3.17299	0.15573	-0.586727	1.1263	1.55766	0.802907	-0.72273	-8.64201	-1.36964	1.62861	-6.68786	-10.3211	-1.70528	-2.39197	0.880566	-8.06802	-9.29714	-0.879166	1.83586	-0.855938	-0.164761	-2.72489	2.83622	-0.436358	-6.34757	-1.7296	-5.87958	0.56901	1.11575	-6.85113	0.789849	1.24086	1.24086	1.18636	1.30976
411	E2AB03	Phosphoglucomutase	-2.13175	-2.10634	0.926236	-2.66207	-0.98079	0.907593	-0.514245	0.0735208	-0.569344	-0.702937	-2.59586	0.427363	-0.536207	-1.01519	-0.34949	0.451086	2.60394	-0.427567	-2.71373	0.271193	-1.32369	-0.238931	-1.33394	-1.07921	-0.251303	-1.29407	-0.988192	3.09029	0.156696	1.36468	-3.52775	-0.220993	-1.36061	-0.924798	2.74302	1.78555	1.45674	-3.59631	1.91676	-0.663697	2.1052	-0.487233	-0.413149	-0.622805	0.622805	-1.28897	-1.3058
658	E2ALH3	Proteasome subunit beta	-2.14515	-1.2725	-0.419356	-1.51042	1.05379	-0.545952	0.39098	0.166239	-0.699483	-0.996145	-0.0361281	2.68744	-1.90116	-0.748051	1.9827	-0.759254	-0.50113	-0.825274	-0.694096	-1.68247	1.60947	0.837534	-2.10887	-0.512701	-1.40788	-0.569593	1.39019	2.23506	-0.435731	1.76633	-0.658738	1.3981	-0.30026	-1.88136	0.362367	1.44732	0.922005	2.24168	0.372096	-1.44008	-2.22697	0.421424	0.609745	-0.539576	0.539576	-1.34371	-1.30386
1140	E2AX17	Glutathione S-transferase	-0.236922	-1.59556	0.456865	2.28227	0.721627	-1.0581	1.58645	-0.98779	1.11043	-1.38048	-1.11322	0.755437	-1.37318	0.709028	-1.30045	-1.35624	-0.965218	1.12853	-1.53367	0.601655	1.14457	-2.78919	-1.51752	-2.19569	0.925201	0.503444	-2.78968	-0.483959	-0.312899	0.892627	2.13112	-0.772722	0.432271	1.29044	0.0470177	0.0373061	1.16908	0.779782	3.21285	-0.0577042	0.248345	-0.0818526	0.0107335	-0.541054	0.541054	-1.3416	-1.30331
917	E2AZ08	Protein disulfide-isomerase A6	3.48908	3.43475	-0.811503	3.06505	-0.99073	0.974577	0.608121	-1.49741	1.10871	-2.0236	-1.75572	4.72791	3.76604	-0.00166545	-0.688794	0.186306	-1.43686	-1.06349	0.463256	0.709883	1.76606	-0.417889	0.911165	2.69135	0.331351	0.235382	-1.13545	3.43902	3.30073	1.05624	1.87825	-1.26252	1.63454	1.06673	1.97176	0.435954	3.86022	2.05549	1.97025	-1.27647	0.775906	3.85564	-0.408701	-0.692339	0.692339	-1.25418	-1.30149
118	E1ZXT3	Inositol-1-monophosphatase	-1.88701	-0.451871	-0.320409	-0.936753	2.59779	-0.415445	-0.0436771	-0.317475	-0.0211139	1.47839	0.289079	1.9161	-2.50382	-0.534144	-0.412964	-0.562957	0.0558215	-2.13189	0.515983	0.1255	-1.44248	-0.880699	-0.463173	0.101499	1.82003	0.0265665	0.406518	2.82469	-0.793809	0.870121	-0.718685	0.830099	-1.19343	-1.29603	0.195568	0.354231	2.45771	0.0844671	3.22884	-2.14838	-0.761743	-0.45152	-0.671175	-0.534245	0.534245	-1.34483	-1.30118
979	E2B271	Uncharacterized protein	-0.840823	-0.514712	3.09123	5.18099	2.28709	0.708556	-1.00829	-2.16673	-0.0705771	-0.334257	2.57061	4.73264	2.99938	1.08257	4.01522	-1.6599	-2.58013	-2.61092	3.02162	-0.842762	-0.0408886	3.04534	-1.10223	-0.864721	-1.19753	0.48081	-4.1527	-1.52856	2.09454	-1.29782	-1.46645	-1.0842	-0.491877	2.0824	1.40926	-0.353023	2.14383	-0.14282	4.72252	1.28286	0.581681	-2.16877	0.0913952	0.817438	0.817438	1.22019	1.30036
374	E2A9R1	Acyl-coenzyme A oxidase	-1.28946	0.350275	0.540169	-1.86498	0.263303	1.10698	0.313753	-0.337763	-2.18059	-1.50058	1.00375	-3.49728	-1.60347	-0.316611	1.6121	-1.5433	1.01594	-0.852936	-2.39361	-0.173424	-0.368958	-0.0546015	1.18696	-1.88218	-1.284	-0.501157	-0.0248383	-0.525409	-0.00491618	0.3204	-3.57465	-1.24803	-2.65511	1.26471	0.172767	-1.23857	-2.80715	-0.389859	-2.75779	0.546623	-0.775766	-1.67473	-0.828407	0.533215	0.533215	1.33645	1.29458
452	E2ACH6	Putative tricarboxylate transport protein, mitochondrial	0.816633	-2.30479	-0.901818	-4.21877	0.656483	-2.36253	0.449083	-0.232911	0.66207	-1.65565	1.15006	-0.304234	-2.25931	0.664105	0.970381	0.369064	-0.631954	-1.8546	-1.39991	-2.14892	-1.04657	-1.06037	-1.60759	0.998518	-1.13211	0.324527	-0.351273	0.316365	-1.89057	0.846822	0.85931	-0.0125809	0.456513	-1.43038	0.29825	-0.855635	-0.875918	0.298431	-1.21392	-0.414446	-1.00832	-1.15468	-0.0450165	-0.494263	0.494263	-1.37604	-1.29285
753	E2ARB8	Adenylyl cyclase-associated protein	0.201411	-2.40301	-0.283687	1.22077	0.925236	1.33803	-1.32967	-3.2481	0.217779	0.377452	-1.43544	0.356274	-0.964595	0.672642	0.843116	0.970188	-0.0285055	-0.675171	-2.68938	-0.733402	-2.37318	-1.93548	-0.456522	-2.10235	2.50075	0.160225	-1.92843	0.675279	-0.749649	-0.0143023	-2.03554	0.434061	0.397246	0.677962	-0.00809892	1.06328	1.49064	1.51725	-1.47825	0.810185	-1.35978	-0.497704	1.2884	-0.539156	0.539156	-1.32615	-1.29104
801	XP_011263602.1 cystathionine beta-synthase [Camponotus	NA	-0.0239314	-0.32884	1.2815	1.66179	1.14944	-0.284638	1.34303	0.653699	-0.474629	-1.39838	1.58157	-0.562473	-1.78446	-2.1863	-0.561334	0.20334	0.0414263	-0.592819	1.31535	0.867676	-0.133413	-1.6523	1.24384	0.228623	1.39944	0.774083	-1.86093	-1.86512	2.55062	-1.38417	0.694914	-0.332323	-1.36814	-1.41537	-1.55293	0.138997	-0.208909	0.277324	0.934086	-3.00232	-0.0485049	-1.28812	-1.7921	0.515135	0.515135	1.34741	1.28981
210	E2A1L3	60S ribosomal protein L12	2.9125	-1.8925	0.10257	-0.70698	0.765302	0.316608	-2.73871	-0.413537	1.39172	0.625801	-0.0199568	1.56956	0.441006	-1.61483	1.47171	-1.91055	-0.621398	-1.33108	-2.65592	-0.511497	0.593764	3.49522	0.494095	0.389191	0.487333	0.450449	0.40027	-0.321579	0.57356	1.00325	0.827499	1.52789	2.33975	0.347427	-0.479056	1.57103	2.43489	0.82212	1.15661	1.204	-2.35702	-0.85157	-0.562176	-0.558503	0.558503	-1.30684	-1.28838
1098	E2AP55	Protein Malvolio	0.672597	0.451998	-1.98427	-0.119822	-0.516178	-0.726532	-0.868806	0.693445	-1.2289	-2.62354	-0.210322	-4.07384	-0.138465	-0.0560237	0.471407	0.381584	2.38356	-1.7142	0.91349	-2.33867	-2.18358	-2.12943	2.63803	-0.315222	2.83679	-1.14279	-0.540431	-0.0971793	1.35014	-0.0250835	-1.09001	-1.65266	1.58552	-2.38997	-2.69393	-0.238606	0.535382	0.889872	6.66314	0.780559	0.481497	-0.100362	-1.71463	-0.691164	0.691164	-1.23904	-1.28792
740	E2AQL0	Microtubule-associated protein futsch	-2.62269	-3.12677	0.703421	0.902649	0.221614	-1.39326	2.21513	0.72666	0.616858	-0.496061	-4.41516	-3.74098	0.184761	-6.05116	-2.66882	-1.44911	0.332343	-0.732929	1.05683	-1.60953	-3.99551	0.304505	-2.62389	-3.79056	1.05096	0.44066	0.968581	-5.48791	-1.30526	-1.47275	1.15635	-2.99375	-1.57789	-1.18057	-4.10884	-3.54176	-1.142	-2.73824	-5.85021	-3.25639	-1.10376	-3.62684	-0.146456	0.782677	0.782677	1.21233	1.28629
499	E2AE51	Cathepsin L	4.98452	4.64957	3.41481	2.8223	2.55866	0.171127	1.88398	-1.2389	1.28185	2.89595	4.81589	6.33294	7.20193	0.284295	2.50411	2.56015	0.239795	3.12961	1.37955	4.8146	2.90773	3.80001	2.74349	4.438	2.9128	2.74536	3.20729	3.25648	4.49386	3.38829	3.20386	2.51773	4.05598	2.07235	4.78523	4.40492	4.46414	3.65042	3.51029	1.51464	3.0132	5.11301	3.23875	-0.623766	0.623766	-1.25915	-1.28187
685	E2AMK4	Ornithine aminotransferase, mitochondrial	0.118422	-2.38257	1.14825	-3.93518	-0.203288	0.676229	0.583509	-1.32622	0.175886	-0.944535	-2.7512	2.07224	-1.19092	-0.275177	-1.8334	0.590374	1.45091	1.41073	1.15367	-0.828595	-3.75866	-0.283123	-1.29873	-0.715596	-0.0761398	-1.25951	-2.00789	4.97196	0.22909	-0.903816	1.80112	-2.17767	0.472204	-1.31905	0.0133224	-2.58807	1.34457	-1.46674	4.07883	0.315522	0.720171	2.49036	-0.373367	-0.683176	0.683176	-1.23366	-1.28085
567	E2AHG9	Thioredoxin reductase 1, mitochondrial	-0.101476	0.741559	-1.28496	-1.94999	-3.25041	-2.35974	-0.112432	1.81074	0.642569	-1.23018	-2.2991	1.13131	-0.474883	-1.58414	-0.853169	2.76907	0.756288	2.70418	-0.386364	-0.186778	0.538094	0.122672	-0.40244	-2.17524	-3.00656	-1.51882	-0.0216987	3.02974	1.9575	-0.782475	0.427911	-1.27016	-0.610919	2.2817	2.43422	-0.479851	0.808843	-0.208017	3.9562	1.87768	-0.222681	3.64169	-1.36514	-0.666374	0.666374	-1.23913	-1.28033
1344	XP_025269497.1 cytochrome c oxidase subunit 6A1, mitochondrial [Camponotus floridanus]	NA	4.49417	4.09795	-1.1749	2.4184	1.38417	0.804342	-0.397645	-0.332004	-0.641799	0.781554	-0.00674518	-1.73342	3.03612	-0.208846	0.564369	-0.280404	1.40258	3.51201	-1.70645	1.17071	3.60245	-0.69484	0.337818	-0.769799	-0.10161	-1.92354	0.0327223	3.98815	-1.49894	-0.148651	2.82775	-0.311433	-0.480571	0.787121	-2.18985	-0.481821	-0.455443	-2.5773	0.757263	-0.471914	-0.907913	4.6375	2.81495	0.711909	0.711909	1.22357	1.28008
1213	XP_019884947.1 LOW QUALITY PROTEIN: uncharacterized protein LOC109610427 [Camponotus floridanus]	NA	0.482119	0.13613	0.541996	0.0704487	-0.527948	0.67844	-1.38037	0.161483	-0.169564	1.25142	0.981919	-1.35518	-1.28105	0.992868	0.910622	0.435186	-1.48616	1.79336	0.895975	-2.95948	-0.0384667	-0.770699	0.0177362	-1.53138	-3.29189	-0.633082	0.781202	0.513061	0.437892	-1.34139	-0.299682	-0.064456	1.10244	-0.0329825	-0.958052	-0.834067	-0.564219	-0.067489	-1.42514	-1.77025	-0.231541	1.1743	-0.817343	0.465781	0.465781	1.39453	1.2793
591	E2AIS2	Nicalin	-2.89798	0.277095	-0.311051	-1.00892	-1.15302	-0.627252	1.03876	-0.152353	-0.450856	-1.17376	1.38799	-0.75726	-0.458635	-0.572705	0.802106	-0.132911	-1.7262	-1.39862	1.29849	-1.76582	-1.3699	-1.74131	-0.343662	-0.612477	-0.51874	-0.0792219	-0.191366	-1.26673	-1.79033	0.598474	-1.36465	-2.15266	-0.428946	-1.06919	1.06547	-2.26252	-1.10241	-1.05483	-4.05805	0.48588	-3.33387	-2.90184	0.546204	0.499034	0.499034	1.34314	1.27503
1092	E2AM68	COesterase domain-containing protein	-1.63064	-1.33182	2.77487	-0.386551	1.47385	1.75779	-0.120634	2.22447	-0.461942	-3.57336	-2.46868	5.3943	-1.64077	-1.51728	-1.70837	0.509348	0.696344	0.880374	-4.99731	-0.917029	-0.801249	1.95452	-3.04719	-1.1771	-1.36754	-2.19441	-0.746556	-5.26794	-0.695624	-1.22913	-1.58346	-0.0239155	-4.22171	-1.18222	-2.18474	0.426709	-1.67904	-1.34127	4.08114	0.308375	1.70269	-1.79865	-1.52829	0.783526	0.783526	1.19382	1.26919
1115	E2ASS1	Prohibitin	4.45645	2.06807	-0.246041	1.68985	-2.48818	-0.374806	0.884912	-0.183836	-0.18664	-1.08708	-3.27755	0.910178	3.89564	0.0493076	1.35671	-0.464546	2.02177	1.34758	1.43098	1.24501	1.63087	-2.42575	-0.213591	2.74018	0.777172	0.199136	2.51424	4.52305	2.48912	-3.39404	2.67191	1.29168	0.467264	0.332292	-0.922265	-1.70611	1.50265	3.08487	2.27518	-0.380106	0.560006	4.33467	1.24444	-0.706819	0.706819	-1.21256	-1.26891
847	E2AVV1	Nucleoplasmin domain-containing protein	8.68193	6.63911	3.84494	5.30894	5.89062	1.95763	5.25547	-0.215773	3.6745	2.56968	5.40258	8.5807	10.0575	3.60152	4.15726	5.90652	1.63465	5.40313	3.19783	7.07357	4.96554	4.04813	5.83113	7.11373	4.75612	3.14461	5.23573	6.89924	7.82971	4.50312	5.14429	6.23357	4.56242	4.65192	7.9942	5.72289	7.41052	4.774	4.11019	2.05036	8.81829	7.33159	5.74556	-0.768252	0.768252	-1.19084	-1.26338
72	E1ZVD6	Synaptic glycoprotein SC2	2.49025	4.21107	2.92709	-0.00859439	-0.560924	-1.86329	1.60863	-1.3056	-0.525914	-0.845137	1.64887	-1.82738	2.42307	0.0275313	-0.728507	0.242301	0.0168445	1.94264	0.782934	3.44912	2.83034	0.197874	0.588714	-0.302976	-1.73087	-1.7826	-1.89715	2.00232	0.314813	2.61927	0.411108	1.5588	-1.88549	-2.29045	1.33189	-0.61454	-1.14191	-0.936668	1.01854	0.715524	0.575696	3.58672	1.15055	0.63539	0.63539	1.22819	1.26049
632	E2AK03	Protein CREG1	7.8298	2.8972	4.54411	2.51085	5.60965	0.552959	0.305349	0.465239	1.23667	5.66505	5.97599	7.29777	6.93888	3.74515	-1.26423	3.13769	-3.61561	5.537	5.01959	4.47433	5.26298	4.90506	5.62441	5.18054	-3.53261	6.6127	0.903914	3.30702	5.61445	3.20556	-2.27271	4.09802	1.64723	1.72888	3.20348	1.69058	4.44247	-2.45099	3.08507	0.856243	5.53464	3.16018	7.08391	1.02576	1.02576	1.1501	1.25777
212	E2A1Q0	ADF-H domain-containing protein	1.53699	2.88156	0.00684901	2.44218	0.581146	1.99356	-0.0857417	0.795099	-2.22614	2.42942	0.822499	2.21827	1.74398	-1.78327	3.99837	-0.748276	1.17613	-0.945874	2.62013	-0.0263101	2.5807	-2.16813	1.07242	1.22063	0.608438	-0.259491	-1.13065	2.66684	-0.257337	0.879092	0.548939	-0.305742	-1.10406	-0.0759071	-0.161746	-0.63792	-3.31954	0.887868	3.73063	-0.384579	0.375865	3.09461	-0.575957	0.619373	0.619373	1.23181	1.25759
302	E2A6H4	Chitin-binding type-2 domain-containing protein	-0.421483	-0.265534	-1.69124	3.28663	-0.0225228	0.268799	0.513141	0.441877	-0.202986	3.10068	-0.637286	-2.66765	-1.40694	0.370487	-1.32273	0.503571	1.53167	2.15051	1.53512	0.801673	-0.781863	-0.708921	1.36361	-0.455709	0.917504	-0.427494	-1.12691	-3.09605	0.298282	-0.286736	0.78578	0.75941	0.0914234	-1.00004	0.652079	-0.0231095	-2.03726	-0.769428	3.94682	-2.01421	0.944508	-0.804731	-2.98316	0.580957	0.580957	1.2499	1.25608
328	E2A7M9	Translocon-associated protein subunit delta	5.61487	4.12232	0.676641	3.52622	-1.15235	0.358078	-1.34616	-2.68307	1.75155	0.952706	-1.45608	2.36034	5.59455	-0.0350701	0.591225	-1.30759	0.434123	3.22213	-0.265852	2.86425	3.25941	0.0175736	2.90914	3.58832	-1.54895	1.25499	-0.755696	4.20635	-1.51914	-2.12519	2.79606	0.453471	0.409342	-0.250522	-0.183793	-0.398289	-1.22359	-2.02866	0.629981	0.110567	1.01355	3.82121	2.3985	0.772311	0.772311	1.18026	1.25432
637	E2AK59	NA	-2.35192	0.649978	1.17088	-1.00102	0.554861	0.603782	0.286368	-1.44561	1.0186	0.179043	-1.47103	0.0438451	0.971101	2.24882	-0.799552	-0.885038	1.33176	-1.65764	-0.294716	-1.0091	-0.321368	0.558135	0.250881	-2.22577	-0.556727	1.83439	-0.275194	-1.66325	-0.990183	0.552581	-0.747817	-1.71021	-1.69883	-1.10653	-2.91436	-0.451459	-2.1114	1.95475	0.374802	-0.200766	-1.56956	0.945876	1.35297	0.500816	0.500816	1.30831	1.25284
524	E2AF24	Xaa-Pro aminopeptidase 1	-0.902757	1.44448	-0.258452	-2.86466	-0.365028	1.30944	-0.0130134	-0.124424	-1.59407	0.977755	-0.364976	-2.93942	-1.16811	-0.672985	-0.783314	-2.04731	-0.199693	-0.333128	-0.858388	0.653825	0.433208	-0.452192	-0.172679	-0.0220831	-0.0711376	-0.666084	-0.989683	2.10609	0.0353869	0.718319	-0.219659	1.27681	-0.978189	-1.04798	-0.804083	-2.80954	0.372366	1.08841	1.70924	0.175007	0.127866	0.706465	-1.16911	-0.468046	0.468046	-1.34742	-1.25247
169	E2A059	Ribose-5-phosphate isomerase	1.05221	-0.753332	1.45314	-1.49195	-0.469791	-0.149256	0.396967	-0.211589	-0.83984	3.20556	-1.46821	3.72806	-0.35192	0.131	-1.2933	0.327881	0.973851	0.870599	0.361414	0.871196	-1.69613	0.243997	1.46356	-0.505118	2.73658	-0.198767	-0.164001	-2.30908	-0.954393	-0.185586	-1.97536	-0.858167	2.91687	-0.379781	0.251244	-0.447568	-0.979712	-1.04403	-1.4395	0.52826	1.79824	-0.923728	-1.04856	0.535374	0.535374	1.27594	1.25224
650	E2AL14	Plasminogen activator inhibitor 1	1.13844	2.11408	4.35612	1.46951	-0.342478	0.0212466	1.70295	0.011394	-2.1633	3.74214	6.78082	9.18026	5.8336	-1.07362	4.94267	-1.26074	1.2776	-0.267395	-1.14108	3.83685	1.00928	-2.48075	3.16881	3.32233	0.594106	1.78797	-1.8659	2.73736	4.59126	-3.18161	0.270909	-1.1755	0.58647	-1.38777	1.06664	0.958034	4.14541	-0.503496	2.65898	0.747037	0.0867734	3.07709	-0.548557	0.921465	0.921465	1.15312	1.25057
375	E2A9W3	Ras-like GTP-binding protein Rho1	0.80357	2.37331	-1.04984	-0.0470778	-0.00278607	-1.10228	0.499416	1.22794	1.36881	-2.16183	1.76241	1.32052	5.49418	-0.9551	0.343376	-2.03272	-0.594995	0.594127	-2.19063	-0.356533	-3.08584	-0.85117	-3.28469	2.50637	0.461389	-0.594403	1.04346	3.23964	2.22241	0.259935	1.18762	-0.501075	-1.51472	-1.45383	0.912836	0.492686	-1.60868	-0.0168723	3.20445	-1.15814	0.996116	4.18087	-1.86267	-0.683688	0.683688	-1.1968	-1.24864
1206	E1ZXD5	Estradiol 17-beta-dehydrogenase 8	0.95125	-0.241024	0.850318	-0.597104	-0.627352	0.907015	-0.15171	-0.399491	0.382676	0.148756	-0.150557	0.129771	-0.549077	0.369114	-1.55145	1.3983	-0.933756	0.67416	-0.631368	-1.33177	-1.13692	-1.08161	-0.21137	-0.582175	-0.496755	0.511457	1.85263	-2.32116	-1.01271	-0.277727	-0.428879	-2.46152	1.91846	-0.636609	-1.5974	-0.568669	-0.229927	-1.20923	0.701165	-2.92327	0.917013	-1.45429	-2.00231	0.450608	0.450608	1.36557	1.24746
449	E2ACC1	Uricase	7.30998	6.44045	1.6098	4.5113	2.48167	-2.70726	3.14708	0.891829	1.27092	-1.6359	1.70936	7.4042	8.52332	0.098293	3.01777	2.03543	-3.25338	4.13771	1.36765	5.48424	4.15775	0.215265	4.34389	5.05549	-1.17316	-4.08212	-1.84164	6.79338	0.850573	-0.0810861	5.08132	-0.343469	-0.27489	-0.590077	4.86014	3.935	4.82099	2.0419	1.70011	-1.02392	-0.0477125	6.88228	0.142805	1.08476	1.08476	1.13553	1.24735
762	E2ARI3	Uncharacterized protein	6.31928	4.2054	1.87444	2.62614	1.79704	0.128442	0.775066	-1.8807	-0.916151	0.226392	3.402	-1.97912	7.16602	-1.13212	0.951653	-0.14015	0.485729	1.64528	-0.688555	4.49113	0.907898	0.561608	3.3765	4.16496	0.712892	0.139515	0.476979	2.61571	4.62769	0.43089	2.68432	0.731292	0.913252	1.43565	5.62283	1.84741	5.08826	1.89448	3.44906	-1.69827	5.30564	4.43975	1.01372	-0.807705	0.807705	-1.16548	-1.2468
197	E2A168	Aquaporin AQPAn.G	2.83635	0.447598	0.244632	1.36032	0.802306	1.31882	0.197078	0.0964176	-1.25667	1.31625	-0.531143	0.901341	4.52838	-0.0320309	0.481143	2.38466	-0.322963	1.75601	-0.567135	3.97799	-0.0641763	-0.81583	2.14128	5.00392	0.718712	3.40804	-2.44472	3.39668	4.13176	-2.00341	2.16586	1.51805	-1.13269	3.00699	2.60185	-1.28673	3.83261	1.50199	-3.15107	0.237637	3.59648	4.18116	3.69427	-0.727104	0.727104	-1.17977	-1.24429
417	E2ABB7	GMC_OxRdtase_N domain-containing protein	-0.291862	-1.19076	-1.31869	-2.76437	-0.112156	1.31771	-1.09093	-1.0686	-1.58313	0.139026	1.72153	-1.50656	-5.18975	-1.0069	0.333054	-0.895879	-0.219	1.72729	-0.407998	-1.64865	-2.66032	-0.0907063	-0.0725813	-1.95016	3.01713	2.04215	0.829924	-2.38282	0.393685	1.1825	-0.128083	-1.76157	-1.35646	1.07559	-0.461999	-0.038885	1.40539	2.13745	-6.27347	2.87784	-3.11913	-0.632094	1.41034	-0.690768	0.690768	-1.18848	-1.24317
663	E2ALL7	Transmembrane protein 63B	-0.743306	-2.84731	0.308956	-3.13373	-5.60247	0.806904	-1.14704	-0.781645	-0.529896	0.194177	-2.11335	-2.08756	-2.17824	-2.1767	0.218198	1.69091	1.96702	1.32888	0.0724518	0.173689	0.500688	-0.40596	-1.24138	1.73908	-1.07647	0.903262	0.717767	-3.21361	-1.58825	0.288451	-0.0102611	3.00421	1.4806	-1.18649	1.69806	-3.00067	-1.32298	-0.931034	-0.961777	1.52591	0.604227	-0.672919	-0.888726	-0.626147	0.626147	-1.20688	-1.23926
220	E2A226	Uncharacterized protein	-0.540902	-2.05665	1.08994	-1.83716	-2.10296	-0.467113	0.292231	0.644344	-0.219324	-0.0527157	2.16456	4.13529	1.67122	-0.517058	0.874565	-0.940165	0.809737	0.477892	2.2926	0.352742	-2.23724	-0.0650835	1.85758	-0.272661	2.04426	1.2964	-0.628775	-4.92446	0.687716	-1.01921	-2.0781	-1.0376	-1.24366	2.22865	-3.14669	1.39964	0.412155	2.0703	-3.82781	-0.626024	-0.253725	-1.15283	1.90637	0.652926	0.652926	1.19392	1.23707
243	E2A3M2	Proteasome endopeptidase complex	0.481469	0.861633	-0.411205	0.0392851	0.636863	0.302388	-0.614882	0.386779	-2.52432	0.833254	1.2575	0.243756	-1.62079	0.010917	-0.376028	1.43235	-1.23802	-0.362486	-0.232203	3.12889	-0.0355271	-0.473557	0.370693	0.52402	-1.27485	1.16474	0.96687	-0.132935	1.10108	0.315166	0.42517	-3.45472	-0.473164	-1.77408	1.1794	0.284196	0.334282	-0.0633092	-0.439948	-1.70517	-0.608659	-2.46341	-1.69163	0.48051	0.48051	1.30635	1.23637
552	E2AGI9	CHK domain-containing protein	-2.14516	-0.462242	-0.977858	2.79102	-0.722548	-0.334069	1.24529	-1.51747	2.05623	-0.464394	-1.48195	0.284355	-1.71836	-1.76868	0.839034	-1.50267	0.429213	-0.797127	0.137643	1.66691	-3.09787	-2.77133	-0.769244	0.539649	-0.721198	-0.888057	1.49613	-2.71139	0.965741	-0.407534	1.58635	2.06188	-0.070388	-0.567346	1.72822	1.60759	0.401249	-0.368349	-3.0544	-0.673539	2.43957	-0.855535	-0.841054	-0.565175	0.565175	-1.23239	-1.2349
131	E1ZY47	HMA domain-containing protein	-0.236939	0.572032	1.50035	2.12826	-0.231494	-0.602318	0.453641	-0.586168	1.24968	1.18001	3.47158	0.185931	0.921182	-0.958354	-0.762135	1.24923	-1.68596	-2.03465	-1.14192	0.649659	0.413973	-1.51459	0.944547	-0.676673	0.379215	0.812283	2.72328	-1.6863	-1.56984	-0.729551	-1.27826	-0.799571	0.362252	0.662018	0.862879	1.52126	-1.50042	-0.616786	0.912411	-1.62395	-2.13416	-1.58207	0.276205	0.508878	0.508878	1.27359	1.23418
137	E1ZYK3	NA	-1.54412	-1.35101	-0.966996	-0.464994	-2.19008	0.333036	-0.189424	-1.08916	0.45429	0.281113	2.86836	-1.29611	-1.40389	-0.538664	-1.89485	-0.189832	1.01489	0.310297	0.307174	-0.180501	-1.48762	-0.785585	-0.954607	-1.82015	-1.03192	-1.51608	-2.29114	-1.64178	-0.551134	0.43101	-3.87819	0.0752684	-3.10424	0.906658	-0.370152	-2.37512	-0.352572	-0.195266	0.0335989	0.722746	-0.471205	-1.41768	-0.224925	0.477167	0.477167	1.30635	1.23375
846	E2AVU4	Nudix hydrolase domain-containing protein	-1.86574	-1.41389	1.81829	0.106139	-1.28365	-0.353216	-2.02457	-3.02243	-1.75196	0.652715	-1.08177	-0.947682	2.37183	-0.179523	-1.63445	-1.04683	-1.14224	-2.80724	-0.323233	-0.986514	1.65646	-2.03264	0.387603	-0.795954	-0.309859	0.143968	-0.730889	0.438229	-0.0675147	-0.352787	-0.170318	0.622306	0.539616	-0.0279749	-0.117002	-0.996921	1.32851	-2.28607	-1.48904	-0.80779	1.77319	-0.858564	-0.902919	-0.481591	0.481591	-1.29936	-1.23257
925	E2AZ96	Ferritin	0.328013	3.22774	1.12657	1.58941	-0.848474	-0.0175009	-0.397131	1.41157	0.135797	-0.671481	0.675192	1.35113	6.62204	0.269488	-0.351217	-1.29857	1.06547	-2.1503	-0.0468072	0.265875	-2.1149	1.21169	-2.85333	2.9153	1.85089	0.131925	-0.12128	0.789905	0.949066	2.6089	-1.76058	-1.07151	0.0121225	0.25613	3.02654	1.91605	2.25398	-0.0458878	-1.4192	0.0282162	1.92262	4.42382	1.7804	-0.651489	0.651489	-1.18537	-1.22921
179	E2A0I0	Gal_mutarotas_2 domain-containing protein	2.63331	1.74944	-1.14368	1.86026	0.606834	0.521083	-2.80826	-1.04928	-0.450114	1.02722	-1.58314	0.782092	-0.346602	1.20979	-0.407269	0.707419	0.0385484	0.95914	-2.06232	0.59011	1.51754	-1.39356	-3.43146	-1.03083	0.423505	-1.47937	-1.64927	3.47078	3.16257	2.06635	0.304575	0.131165	0.00658069	0.065142	3.19296	-4.68149	1.91578	1.79513	1.89543	-1.10962	0.184591	2.72283	1.1222	-0.646011	0.646011	-1.18732	-1.22919
386	XP_011254257.1 muscle LIM pr	NA	-1.00072	0.0280037	1.92244	-0.162761	0.451091	-0.156002	0.663472	-0.469216	0.0202296	0.670082	0.670306	-0.741188	0.255268	0.198656	-0.495737	-2.36614	-0.78435	-1.81708	-1.21987	0.499851	0.579119	0.28202	-0.194482	0.93262	-0.96343	0.234473	-1.7376	-6.77069	-0.443879	1.60523	-1.27596	-1.76838	-0.217332	-1.73055	0.105769	-0.663143	0.675812	0.988908	-2.39199	-2.00613	1.75284	-1.62541	1.41918	0.556288	0.556288	1.23013	1.22883
666	E2ALP2	Peptidase_M28 domain-containing protein	6.92692	5.07538	2.54026	1.44737	5.15648	-1.27663	0.405656	0.570055	2.17834	-0.13714	3.77865	4.87577	6.68611	1.29477	-1.07842	2.13313	-2.18492	4.64353	-0.233493	5.5779	5.11538	-0.298255	2.39856	3.30105	1.26317	1.45276	2.42127	6.26005	2.75477	-0.313642	5.12864	3.1169	2.79045	2.33536	5.94854	5.91819	6.0546	2.39783	5.88354	1.45575	0.618749	6.10621	0.587915	-0.856915	0.856915	-1.13319	-1.22296
437	E2ABZ0	NA	-0.867761	-0.0832848	-1.26891	2.11438	-0.280788	-0.388285	0.964745	-0.630914	-2.43977	0.432226	-1.12794	-1.42271	-1.11583	0.812399	-0.732672	1.14041	3.44347	1.20594	-2.16493	0.437125	-2.41422	3.30095	0.0283934	-1.29791	1.25085	2.26495	1.59636	-0.977072	0.333776	-0.838443	0.875283	0.0927422	-1.00655	0.81596	1.55878	0.608965	0.189172	2.9548	-0.317773	-0.539897	0.47572	1.14361	0.441824	-0.527257	0.527257	-1.22957	-1.2132
716	E2APG1	Uncharacterized protein	4.10058	5.90802	3.73226	8.90558	3.95371	3.8994	7.49874	0.129421	6.21214	4.957	6.88299	5.03676	8.02982	5.14924	4.13051	7.42525	0.977517	6.90677	6.09213	6.92001	5.03632	8.25556	7.23539	8.70198	3.06449	7.93104	5.38203	5.14701	4.07826	7.68247	4.79699	7.73379	6.89043	7.45498	7.90801	6.24889	7.30027	8.27076	4.46284	0.906059	6.79516	6.86662	7.78795	-0.732452	0.732452	-1.13743	-1.20644
69	E1ZV54	Aldedh domain-containing protein	2.26119	0.644567	-0.0927748	0.0124794	-0.67782	-1.1278	-1.73824	-0.057379	2.98238	1.50119	0.924376	5.47643	2.1084	1.55342	1.44716	-1.96293	2.06968	-1.34292	-0.487784	0.846224	-1.26083	1.31132	-0.64818	0.66166	1.58494	0.590924	3.27815	4.89896	1.38885	-2.26184	4.39951	-1.07348	-0.0525002	-0.652314	-0.5522	2.38343	1.89089	-1.23197	6.54583	1.89717	-0.600775	3.8426	-0.702902	-0.714262	0.714262	-1.13923	-1.20425
1258	XP_025263702.1 proto-oncogene tyrosine-protein kinase ROS-li	NA	-0.827515	-2.13835	-1.19025	0.724796	-1.01595	1.77541	0.546779	2.03783	1.32731	0.84991	-0.214209	-2.06173	-2.59294	1.52166	0.966078	0.915876	-1.35837	-1.28625	1.23275	-1.28739	-1.75535	1.05342	-1.66051	-1.63242	0.628668	-1.28548	0.733647	-3.75875	-1.18373	-1.02061	-0.894291	0.447672	0.728508	-0.160698	-1.13099	-0.0972583	1.32849	-0.0685297	-3.63516	-1.19774	-1.49996	-0.123291	-0.446331	0.5205	0.5205	1.22206	1.2038
1278	XP_025265121.1 serine protease 52 [Camponotus floridanus]	NA	7.46107	1.68354	0.159646	0.0804563	3.68795	1.48616	0.365515	0.0837156	-2.21248	-0.0382858	0.945755	5.40867	7.88062	-0.171703	-0.453668	-0.126555	-2.27312	3.38719	-1.64101	4.53792	2.0927	0.665583	-0.398542	0.47848	-0.630626	0.14679	-0.52213	9.10736	-0.246774	-1.64084	5.42426	0.410415	-0.42755	1.20313	1.3238	2.48905	8.30864	4.51238	8.05387	1.86328	-0.0768334	6.07245	2.89892	-1.01953	1.01953	-1.09455	-1.20046
166	E2A031	Cytochrome b561 domain-containing protein	1.17167	-0.9838	-0.466871	-1.20773	-1.36681	-0.0207054	-0.934423	-0.819749	1.12485	0.871596	2.44712	-2.22856	0.450189	0.418252	0.564446	-1.0691	-0.299217	1.76655	1.21009	-0.655969	-0.0604969	1.75097	3.91148	0.73029	-0.457669	-0.0902176	1.30495	-0.280108	1.45508	0.946119	-1.62941	0.13563	-0.226133	-1.57616	1.85995	1.67097	0.948523	0.212798	4.7876	1.02927	2.08859	0.612405	1.84121	-0.525847	0.525847	-1.21152	-1.19886
231	E2A2S9	Limulus clotting factor C	-1.23478	-2.04811	-0.597702	-1.5451	-0.427483	0.148826	0.937002	0.329926	-0.229763	0.455493	0.872933	-0.260331	0.200754	1.63077	0.821262	-0.296827	-0.236976	2.18475	-1.46806	-1.8953	-2.97522	1.9702	-1.39586	-0.863781	0.16794	1.6295	1.0325	-1.27196	-1.33634	-1.0901	1.53666	-1.44052	-0.750651	-2.37425	0.482715	1.51772	-0.671022	-0.832086	-5.08145	-0.838179	-1.87031	-1.53956	-1.42599	0.530976	0.530976	1.20683	1.19804
557	E2AGM5	XendoU domain-containing protein	-2.37484	1.3766	1.21332	-0.325875	1.03318	-0.860843	-0.569327	0.554954	1.17968	-1.08091	-0.64605	1.55857	1.00767	0.0587985	1.82051	0.610838	1.50793	0.648652	-0.935411	-0.686773	0.704003	0.758314	-0.584881	-0.624095	-0.732029	0.316941	1.95333	-0.0455862	-0.686804	-1.64678	-0.256943	0.613653	-0.575792	1.01023	-1.14755	0.0473617	1.72052	-1.04679	-1.80461	1.13423	1.01344	-1.4938	-1.31531	0.437803	0.437803	1.30105	1.19659
592	E2AIU9	Uncharacterized protein	0.013579	-1.99183	-1.21842	1.55465	0.482397	-0.00605529	-2.5115	-0.451757	-1.81866	-0.0527356	0.389743	5.72033	4.25269	0.0652128	-1.57441	-1.62485	1.08153	-3.59602	2.16335	-0.772615	-3.13494	-4.29654	0.0947852	-0.776496	0.364163	-1.04244	-2.20299	-3.23587	-1.61164	-0.409205	-0.681281	-2.39754	-2.33453	-0.720323	1.53683	-2.95688	0.170645	-0.847481	-3.96667	1.70407	-0.673407	0.394081	-0.427895	0.691305	0.691305	1.13556	1.19568
1260	E2AV85	CLIP domain-containing serine protease	-1.26659	-0.215242	0.437704	-0.617746	-1.1223	-2.28376	-1.48059	0.0314653	0.149831	-3.61917	0.126031	-0.759952	-0.426045	-0.572019	-0.273633	1.90612	-1.45353	0.142977	0.314603	1.47757	-1.02633	-0.122599	-1.00938	-1.02394	-0.166894	-0.740005	1.73214	-4.83766	-0.635331	0.620182	-2.96014	-2.53772	1.06394	0.223077	-0.979051	-0.224523	-2.08954	-1.37062	-1.9187	-1.90568	-1.82518	-0.881468	0.340672	0.498753	0.498753	1.22112	1.19023
203	E2A1E3	ZP domain-containing protein	-2.84213	-0.304877	0.0823962	-1.47755	-1.71962	-0.606674	0.671953	-0.160077	-0.933337	0.676528	1.04256	4.57167	-0.292492	0.301193	-2.04267	-0.731857	-1.1238	0.0668763	-0.26892	-0.205985	-0.237289	2.65202	0.33815	1.74078	1.25697	1.27417	-0.299549	-1.7022	1.50469	-0.938864	-1.22084	-2.42551	1.01293	-0.0968871	-0.952746	-1.77175	-0.0671437	-3.16419	-3.95579	-0.183101	-0.427154	-1.20717	-1.67708	0.554416	0.554416	1.18017	1.18868
121	E1ZXY3	Uncharacterized protein	2.1566	0	1.94422	1.3063	-0.864568	2.16297	-0.881608	1.25866	0.831601	1.33416	-0.468037	-3.47195	4.22722	1.18031	-0.589422	-0.825466	0.165591	1.10684	0.506335	-1.17651	-1.60118	0.373247	-1.77893	-0.0801321	0.0577858	-0.310331	0.130421	2.47501	-2.37485	-1.22361	-0.146892	0.472882	-0.208279	-0.504178	-0.457525	1.31425	-2.26625	-1.54047	3.43802	-1.28394	-0.0145992	-2.3139	-0.400865	0.561715	0.561715	1.17265	1.18587
730	E2APZ9	Profilin	3.01963	2.76228	-0.39353	2.27338	-0.0287794	1.51719	2.34389	0.26343	1.8755	0.797132	1.98103	2.6284	3.55302	2.07573	3.89251	2.07965	-1.53019	0.501042	0.136053	1.92001	1.29927	0.288511	-0.626581	1.17302	-0.584522	1.87657	0.299778	0.823533	1.81617	0.331531	0.408613	-0.0551709	2.34557	2.47079	-1.72223	2.60601	2.3416	0.937243	3.70474	0.323828	-3.07766	0.885735	0.735661	0.536593	0.536593	1.18533	1.18435
813	E2AU18	Peptidase_S9 domain-containing protein	-2.02698	-0.46619	-1.07034	1.28308	0.220857	-1.58972	-0.664038	-0.291242	1.03511	-0.668474	0.979327	-2.07276	0.325278	-0.372773	-1.41874	-0.315589	0.271898	-1.64224	0.786374	-1.60724	-0.618874	-0.177618	-1.80893	-1.05671	-0.730669	-0.0198382	0.116377	-0.330849	-1.87002	0.809261	-0.015206	-1.26598	-0.458001	-1.58148	0.304074	-1.68512	-0.29077	-0.980159	-1.72108	-2.65262	-2.86802	-1.01836	-1.12463	0.404172	0.404172	1.32869	1.17786
1241	XP_025262873.1 sulfite reductase [NADPH] flavoprotein alpha-component isoform	NA	-0.2092	0.151218	-0.966198	-2.4086	-0.258001	0.189495	-0.636541	-1.23221	2.07252	-0.169336	-0.930678	0.601622	1.71701	-0.305004	-1.42878	-0.110635	-1.02506	1.90481	-1.1372	0.642019	-0.473204	-1.24368	0.330711	-0.564826	-0.288792	-0.400098	0.486592	-2.02118	-0.44326	-1.47547	-0.857531	1.22995	-1.70142	-0.759171	0.95914	0.635809	-0.178874	-1.9621	-3.44756	0.0686687	-3.86152	0.492548	0.49612	0.465521	0.465521	1.22909	1.17338
755	E2ARE3	Peptidase S1 domain-containing protein	-2.14273	-1.68774	-0.825538	0.164958	-0.507281	1.34249	-1.1001	-1.16645	0.836738	0.911318	-0.180907	1.1248	0.0227567	-1.17138	-1.27926	-0.570428	0.391152	-2.58768	0.559747	-0.653633	-0.185425	-0.902012	2.12597	2.70691	-0.763522	-1.41924	-1.94712	-2.76934	-1.9432	-1.71881	0.316042	0.356214	0.0628081	0.223557	-0.799406	-0.695039	-1.30203	-2.49896	-4.63292	1.87591	-1.36763	-0.647209	0.275493	0.509129	0.509129	1.18953	1.17315
806	E2ATI6	CAAX prenyl protease	-1.56557	-3.29626	-1.81987	-0.50725	-0.905203	0.719351	-0.0851942	0.00923767	1.1299	0.468047	1.23935	-1.57505	1.69339	-0.643641	1.27905	-1.94958	0.889336	-0.316639	0.338474	0.54953	-0.57989	-1.24907	1.19649	0.631562	0.154001	0.712055	2.10712	-0.114946	-2.36415	-1.56826	-3.88907	1.85749	-1.62173	0.166055	0.266689	-2.74622	-1.03038	-0.663308	-0.113334	-0.921329	-1.26281	-1.89672	-2.17946	0.507269	0.507269	1.18686	1.17012
1300	E1ZYQ6	Peptidase S1 domain-containing protein	4.95408	1.88541	0.804061	0.64114	2.53886	0.360286	-1.47782	0.236593	-0.954394	-0.28763	-1.55825	0.021906	5.26228	-2.25764	-2.12045	-1.55534	-0.293919	3.29452	-2.38024	3.02141	2.79374	0.729681	2.80912	1.33157	-2.98461	-0.16595	-1.28857	5.72816	0.410896	0.0439658	4.50225	0.308536	-0.667835	2.51077	2.17366	0.344594	5.81833	1.01648	3.95775	0.598703	0.594378	4.70168	0.738935	-0.76771	0.76771	-1.08778	-1.16594
568	E2AHH9	L-type lectin-like domain-containing protein	0.264219	-1.24059	1.25405	-0.200346	0.147703	1.78212	-2.10881	-0.512501	-1.05854	-0.972413	-1.077	-1.01714	-0.439446	-1.10205	1.79581	-1.66526	-0.0259582	-0.054979	0.934908	0.0474892	0.220404	0.662013	-0.692054	-0.937178	1.31809	0.200102	-2.26099	-0.133853	-0.22594	-2.08317	0.543734	-0.533215	0.189202	-0.101595	-1.49451	-2.52355	-1.26273	-0.454361	-2.73572	1.34416	0.290377	-1.37771	-0.700644	0.427046	0.427046	1.26321	1.16362
1086	XP_011259281.2 uncharacterized protein LOC105253145 [Camponotus floridanus]	NA	11.7352	11.8659	11.9485	10.0431	9.74475	10.36	11.0722	11.5499	10.992	11.6572	10.5493	9.7481	11.2131	12.0271	11.5255	11.4875	10.523	12.0011	10.1113	11.992	11.2221	11.2494	12.5321	11.3261	11.3132	11.5348	11.6334	9.75701	12.1316	12.3928	10.9673	12.4774	12.1195	11.9282	12.2992	11.6826	11.1822	12.1527	8.75794	11.3131	12.6129	10.9165	12.5105	-0.370009	0.370009	-1.38386	-1.16219
900	E2AYF4	Arrestin domain-containing protein 3	1.34651	1.26824	0.558421	1.28778	-0.0408846	-0.761514	-0.293856	0.926221	-0.214852	2.04628	0.904899	0.815249	3.29082	-0.047992	2.34457	-0.0641705	-0.691762	0.755957	-0.202204	-0.683738	-0.668521	-0.0623977	-0.521881	0.118392	-1.94485	1.84666	0.388311	-0.805368	-0.369535	-0.195131	-2.83368	0.156808	-1.17091	-0.290888	2.6798	0.607038	-0.307887	-0.257838	0.11225	-0.220259	2.13783	0.178652	1.08776	0.445062	0.445062	1.23553	1.16187
162	E1ZZW6	Heat shock 70 kDa protein cognate 4	1.53875	-0.0933196	-1.25698	-0.100121	3.56127	0.267952	0.942349	-0.624824	-1.20986	0.0257536	-0.039884	-1.01398	-1.14745	-2.01128	1.12432	-0.181037	2.43244	0.847726	-1.37691	-0.402585	-0.248084	-0.729692	-2.67902	1.65336	-3.0246	-0.214567	-0.773353	-1.52869	-0.385657	-0.31264	-3.35457	1.07177	-0.816412	0.67448	0.582576	1.02994	-1.04316	-0.0516844	-0.51977	-1.7232	-1.09457	-2.52327	0.320655	0.498429	0.498429	1.1807	1.16052
431	E2ABQ4	Fe-ADH domain-containing protein	-1.72137	-1.10066	-2.12904	-0.157071	0.138077	0.344211	-1.39329	-0.271151	-0.439115	-2.04955	0.389696	-3.33116	-0.623712	0.245562	-0.767145	1.13262	0.821905	-0.455616	0.86607	0.875964	0.407398	0.698321	-0.162529	-0.112926	-1.53442	-0.434474	1.93814	-0.0696873	-0.512692	-1.2295	2.95516	-0.373262	-0.545827	0.666001	1.78244	0.434184	-1.25398	-0.269574	0.225566	0.328306	-0.0917873	-2.2393	1.79847	-0.450502	0.450502	-1.22133	-1.15688
1194	E2A6E1	Protein G12	4.39667	-2.45964	3.03474	-2.27514	2.24246	-0.896694	-1.85554	-1.60812	-0.331061	0.165546	1.88606	5.06472	5.28901	0.671378	1.38687	-0.275328	-1.64334	3.33415	-1.65749	2.60062	2.33342	-0.107227	-2.04661	1.59103	-1.99633	-0.16042	-0.918378	9.81453	2.9205	-1.24593	5.33913	0.716812	1.35509	-0.0928672	0.0987201	-1.03174	7.96454	-0.236299	5.55541	-1.81126	-1.37309	2.6941	4.65773	-0.942087	0.942087	-1.05707	-1.15597
528	E2AFD6	TOM1-like protein 2	-0.907913	-0.358248	-2.16553	1.40985	0.685079	0.709125	-0.0795636	-0.400574	-0.779494	-1.9299	-0.259191	-2.18429	1.20374	0.858356	1.13947	0.922142	1.46076	1.85663	-0.359532	0.921927	-1.41878	-0.761159	0.0920439	0.862049	0.117529	0.343769	1.21391	-2.79961	-1.26865	-0.764816	-1.54043	1.63356	0.714611	-0.463977	0.412327	-1.15329	-1.215	-0.671854	-0.213919	0.60754	-1.50176	-2.32793	-1.18854	0.445222	0.445222	1.22148	1.15284
186	E2A0P0	60S ribosomal protein L13a	1.07344	1.55766	0.736569	-0.878583	0.912774	0.379883	0.908516	1.46851	1.39397	0.205783	0.491463	-1.05532	-0.0808983	1.46828	-1.72498	0.548888	0.477696	-0.0399396	0.890051	0.349836	-0.895054	-1.68128	0.224244	-1.57438	0.0709166	0.447864	2.31784	0.0804405	-2.37587	0.146277	-0.543294	-0.616139	0.596797	0.379993	-0.234636	0.48365	0.644483	2.71542	-2.23092	-1.11836	0.978866	-3.31689	-0.0444482	0.452294	0.452294	1.21135	1.15161
1082	E2AJ94	CHK domain-containing protein	-0.229175	-3.39997	-0.365491	-2.30203	0.319839	-0.59183	0.331104	0.245857	0.245687	0.0335179	-0.859174	-0.590891	-2.16537	-0.87092	-1.32534	-1.2398	-0.0574826	0.346415	-4.17441	-0.3794	0.530923	-0.400169	-1.20821	0.635221	-3.26163	-0.826052	-0.656639	-3.04282	-1.89621	0.0750215	0.326993	0.902328	-0.239506	1.4874	0.462259	0.114404	2.00765	-0.0142002	-0.897606	-1.34878	-0.595192	-0.257953	0.59023	-0.465477	0.465477	-1.19376	-1.14912
529	E2AFE6	Queuosine salvage protein	-2.02464	0.108688	0.290208	0.663678	-1.29153	0.281489	0.974331	0.760824	0.588285	1.14086	0.0665062	-1.61993	0.479354	-1.4149	-1.6097	-0.62473	2.42719	-1.47047	-1.5872	1.09414	0.508607	-1.14997	0.664672	-0.912068	0.670656	-0.670371	-0.412364	-3.41335	-0.38822	-1.71921	-2.11822	-0.462343	-0.639102	-0.47421	0.0288443	-0.0870886	-0.482495	0.867045	-0.0579378	0.16111	0.0344892	-2.61042	1.51926	0.438985	0.438985	1.22019	1.14699
1301	XP_025267286.1 flotillin-1 isoform X3 [Camponotus floridanus]	NA	1.54918	-0.900256	-1.94767	-0.254418	0.75717	1.08121	0.199183	-0.569398	-2.48958	-0.758076	0.27193	0.547973	-1.31142	0.245648	-2.2252	-1.04752	1.29829	0.464452	0.739948	-0.410222	-1.27134	-0.829109	-0.514277	-0.649094	-1.70574	-1.88112	-0.376188	-2.28266	-1.15545	0.303297	-0.594812	0.395083	-0.395766	-0.852098	-0.956207	0.839685	-1.00526	0.851007	-1.23965	0.822647	-0.875892	-3.00538	-0.893069	0.412247	0.412247	1.25353	1.14376
1176	XP_025270976.1 aldehyde dehydrogenase, dimeric NADP-preferri	NA	2.17703	1.43001	-1.51768	-0.471174	-3.79654	-0.826015	1.74654	-0.609457	-1.34789	1.4274	1.1142	0.746624	3.83685	-0.403908	1.81639	0.951774	1.10021	0.778417	-1.81547	-0.231286	1.04959	-2.22772	-1.0468	1.72412	-1.80653	0.187499	-1.12943	4.16202	2.27984	2.23982	2.75555	0.571421	0.0617328	-0.81673	-0.768154	-1.83149	2.23064	-0.909029	2.12661	-0.249251	0.758781	3.13607	0.334042	-0.584134	0.584134	-1.11015	-1.14277
506	E2AEA4	Peptidase S1 domain-containing protein	2.62472	-1.31158	-3.48883	4.84183	-0.258516	0.94342	0.0142468	1.79321	0.529065	-0.872553	-2.65768	-1.40341	3.11431	-0.33298	0.274235	0.770903	0.770669	-0.310567	1.0157	-1.91333	-1.49408	1.47982	1.5397	2.6441	-2.05877	-1.55772	-1.58554	2.03741	-1.0374	1.19059	-0.857812	-3.45052	-2.21119	0.305347	-0.319106	-1.36158	0.790148	-0.531844	-2.74553	0.110674	1.8455	0.713182	0.896217	0.605641	0.605641	1.10099	1.14187
168	E2A057	Dihydropteridine reductase	-4.11499	0.678077	0.423633	-0.0698736	-0.14982	-0.195097	-0.273362	-2.86402	1.06151	-0.976271	-0.0127007	6.20547	-1.30703	0.180123	1.07766	-1.81448	-2.09362	-2.10314	-1.42566	1.95398	0.287753	-2.04266	0.126388	0.190619	1.30153	1.44664	-0.138778	2.26999	0.598144	-0.497069	-1.14194	0.274051	1.15001	0.778927	-0.819019	1.49896	0.574028	0.0615445	2.48093	-1.67192	-1.21082	-1.18537	-0.985112	-0.5726	0.5726	-1.10899	-1.13776
944	E2B0E1	Plastin-3	-0.289007	-2.66993	-0.0300127	-1.17891	0.343063	0.471224	1.1366	-1.40727	-1.21507	-0.144358	-0.528681	-0.141751	0.499954	1.89173	0.303277	-0.582947	1.79909	1.10756	0.825643	-0.169971	-0.960786	1.7735	1.52393	-0.665602	1.97418	-1.29448	1.93254	-3.1683	-0.125146	0.159621	0.370076	-1.04005	0.540142	-0.848412	-1.10593	-0.643895	2.3209	1.8635	-2.66752	-1.36083	-2.45247	-2.37071	0.778259	0.492679	0.492679	1.15134	1.13543
1010	E2A3G1	EHN domain-containing protein	2.17439	0.918159	-1.97006	0.80496	-0.435154	0.650599	-1.16991	1.11901	-0.178073	-1.42822	0.546024	-2.28135	1.85789	-1.65541	-1.6284	-0.28457	1.21661	-0.998647	1.79753	-0.35708	-0.739828	-1.71713	-0.229823	2.8859	0.13243	-0.362429	-0.368064	4.41664	-0.820794	-2.03156	2.41764	-0.462394	-0.725294	1.73862	-0.373835	-1.22461	-0.466018	0.500227	2.96309	-0.288486	-0.957048	1.20209	-1.20799	-0.521818	0.521818	-1.13069	-1.13455
819	E2AUD9	EMC1_C domain-containing protein	0.582915	-0.142296	0.0238572	-0.92962	1.54633	-0.691255	-1.91668	1.24272	0.468534	-0.352495	-1.4175	-1.4672	-0.337546	0.58259	-1.61064	-1.41913	0.432808	-1.80953	-0.36021	-1.32096	-0.471081	1.11081	0.813518	-0.522495	-0.979918	-2.48015	0.297249	1.07493	-2.00686	0.105391	-1.52531	-0.48118	-0.893904	0.207867	0.0884274	-1.20573	-3.00412	-1.73829	-2.01679	1.17123	0.430299	-0.562562	-0.667337	0.411894	0.411894	1.23147	1.13025
548	E2AGB4	Cytochrome c domain-containing protein	4.19291	3.31216	0.211051	2.38216	-1.64847	0.57891	-0.722061	0.192174	-0.306983	-0.815939	0.64179	0.845265	3.06461	0.72728	-0.0319263	0.0399846	0.053861	0.369273	1.89817	1.38677	0.476051	-1.36542	0.149881	2.23049	0.270289	0.0813122	0.767915	3.48837	0.346952	-0.945585	0.908302	1.75533	0.697193	0.903352	1.49732	-0.719494	0.722953	3.21754	0.887	-0.133944	2.73175	1.9976	2.47926	-0.479564	0.479564	-1.15171	-1.12814
343	E2A8B4	NA	-1.24232	-2.49621	1.48913	0.82623	0.019319	-1.34557	-0.133404	0.7666	0.403944	-1.28364	-1.27341	-0.035804	0.212512	-0.124073	2.59286	-0.376011	1.01706	0.373794	1.37398	0.602389	0.323775	1.33105	-0.721237	-0.443371	0.359489	1.48622	-0.547749	-2.01657	-0.427317	-2.28065	2.11226	-3.53282	1.31469	0.269073	1.47155	0.790985	-0.64548	-1.17911	-3.12864	-0.85759	1.05549	-1.16498	-0.140591	0.475298	0.475298	1.15043	1.12465
673	E2AM05	60S ribosomal protein L27	1.5965	2.41423	-0.46323	0.99854	-0.441121	0.33823	-0.822704	1.3116	1.1662	-0.249717	2.02989	2.67436	-2.0403	-2.88957	0.124647	-0.0093276	0.526649	1.31235	1.02115	0.493859	3.18962	-0.646746	0.177621	-1.28989	-0.197631	-1.91099	-0.122206	4.44309	-0.171717	0.0549264	4.03785	-0.445353	-0.145591	-0.636634	-1.30899	-0.458742	-2.28321	0.4693	1.94218	-0.0999131	-0.798959	-1.81695	0.290499	0.536044	0.536044	1.10839	1.12306
905	E2AYJ8	Cytochrome c oxidase subunit 5B, mitochondrial	2.06225	-3.11215	-0.582533	0.565904	0.491635	-1.43988	-0.533318	0.556734	-2.59851	0.0846189	-0.175966	-1.94445	0.817701	-0.287301	2.31745	-2.27446	-1.09678	-1.5384	-3.05004	-1.60052	2.13672	-1.37859	-1.15888	0.775433	0.657529	1.62352	-1.01319	-1.15347	-0.272566	-0.698024	-0.237479	-0.157249	0.475912	-0.418868	-0.22637	0.00226697	0.377932	-2.19536	-3.23286	1.11645	1.3875	0.684459	0.308658	-0.48755	0.48755	-1.13846	-1.12295
732	E2AQ44	Glucose dehydrogenase [acceptor]	-2.00655	-2.04274	1.17168	1.37729	0.744342	0.395048	0.381733	1.52946	0.24417	1.7384	1.51463	4.21901	-0.399521	0.715475	1.59592	-1.50646	-0.249471	-1.36676	1.53636	-1.18771	0.237447	-1.21597	-1.87692	0.191414	1.21697	0.581583	-1.46545	-3.82394	-2.95544	-0.795707	-0.815932	-0.891389	0.220687	0.544831	0.622768	-0.0931886	0.800717	0.116614	-2.01465	3.37532	0.95969	-0.934473	-0.589915	0.528729	0.528729	1.10987	1.12113
1014	E2A3W4	Vacuolar proton pump subunit d	4.55128	4.02924	1.8764	4.45207	2.86603	1.06727	2.42554	0	-1.53233	0.16273	2.56063	0	4.82909	-0.453299	0.670614	3.16966	1.0616	1.59948	1.13977	2.27032	3.16593	-1.3536	5.97994	2.77811	-1.0482	1.2902	2.24836	3.70292	-1.31475	-0.204094	1.79805	-1.91553	-0.069378	3.14451	1.57624	0.16268	3.59463	2.50371	5.01168	-2.01697	-1.32567	4.60902	0.643582	0.677995	0.677995	1.05709	1.12067
189	E2A0R2	Acetyltransferase component of pyruvate dehydrogenase complex	0.493	-0.842775	-1.38577	-3.1861	0.100045	-2.12629	2.13777	-0.951251	-1.16759	-1.29278	-1.0406	-1.78559	-0.847868	0.802646	1.59248	0.565952	-1.19153	-1.78211	1.71361	-0.529971	-2.33733	-0.863745	-2.07311	-0.548102	0.0768538	0.520916	-0.727521	0.101484	-0.263922	1.12743	-2.8958	-1.79556	0.00444222	-0.0930844	-1.03729	0.777472	-0.021602	1.11398	-1.25372	0.297016	0.739281	-0.725772	-0.559893	-0.437436	0.437436	-1.1782	-1.11822
1185	XP_011269299.2 glutaredoxin-C4 isoform X1 [Camponotus flor	NA	-0.914787	-1.82176	-1.16464	-0.0827064	0.302232	0.557119	1.60348	0.96737	1.90216	0.115679	-1.63785	1.5553	-2.15536	1.39964	-1.03477	1.29494	-0.725203	-1.16806	-1.43201	-1.2436	0.527927	0.0890385	-0.565371	0.98995	-0.588623	0.263669	1.24628	-0.619972	1.29652	-0.324211	1.97133	-1.07586	1.01249	0.162381	0.690486	-0.615896	0.567606	-0.210287	4.64572	0.047733	-0.51011	-2.29579	-0.556464	-0.462728	0.462728	-1.14979	-1.11635
933	E2AZR3	Tyrosine-protein kinase	-0.995665	-1.9663	0.653815	-3.74877	-2.02561	1.44812	0.485934	0.574782	-1.6501	-2.871	-1.7912	-0.921502	-1.96056	0.889122	-2.63871	-1.3308	-0.0480842	-0.432534	-1.51979	-1.07803	-3.54102	0.953356	-1.29436	-1.82806	-1.00562	-0.36313	0.258183	-2.34542	-0.0110434	-1.27415	1.06231	0.436512	0.015579	-0.814792	-1.81876	-0.249325	-1.18586	-0.773068	1.04261	0.539185	-2.70997	-0.726722	-0.735366	-0.454304	0.454304	-1.15765	-1.11634
522	E2AEX0	Tripeptidyl-peptidase 2	-1.11098	0.13631	0.576648	-1.14272	0.38487	-1.20338	0.278147	0.0277577	1.40002	0.0698621	-0.821916	-0.129047	0.972876	0.918495	0.312975	2.09963	0.193308	-0.148395	1.30347	-0.511043	-4.92446	-0.0825396	1.56196	-3.30423	0.787644	-2.72932	0.47424	-1.01256	0.0824839	2.65873	1.05211	-0.290609	-2.16576	0.546034	0.507345	0.0708201	0.293621	-0.262594	-2.00764	1.80088	-0.624012	-4.2716	-2.04676	0.529096	0.529096	1.10371	1.11633
1171	XP_011268281.2 cytochrome b5 [Camponotus floridanus]	NA	0.341271	0.602023	-1.25955	-0.109045	0.479884	0.628176	0.701886	-1.84016	-1.11084	2.9858	-1.41745	0.330234	-0.247819	1.64004	0.58218	0.575887	-0.609039	-2.02184	1.05415	0.0525955	0.779398	1.8073	2.00055	-1.14522	0.19195	0.277446	-1.21658	0.310865	-0.126309	-0.348421	-0.432574	0.299634	1.94586	-1.39872	0.977901	-1.78536	-1.04907	-2.21388	3.90881	-1.0464	-1.41795	1.79406	-1.9241	0.478408	0.478408	1.13574	1.11572
1164	E2B1B3	Four and a half LIM domains protein 2	0.238923	0.0040207	0.0209438	3.08288	0.337089	-1.44122	2.53102	2.24657	-0.738483	-3.0587	-2.61304	-1.48019	1.94827	0.931151	1.79379	0.298133	-0.712365	0.299178	0.19391	0.658592	-0.2139	0.669258	-1.29767	0.840864	1.10833	-0.0774892	-3.13709	-1.7928	-0.77608	0.659613	0.494056	0.692261	0.583968	0.546503	1.58027	0.0470019	-1.38789	-1.64431	-1.27758	-0.587599	-0.129279	-2.25174	-0.0324101	0.487859	0.487859	1.12693	1.11447
808	E2ATM3	Sortilin-related receptor	1.38455	-0.446981	2.44027	0.0687972	2.49806	-0.901868	0.113635	0.16614	-0.470071	-0.169999	1.0055	-1.50198	-4.00585	1.66964	-0.190651	-0.361011	0.00591605	-1.29914	1.13315	-0.281694	-0.716326	0.332829	-2.51286	-0.485022	0.709774	-0.727093	-2.5413	-4.17455	1.01534	1.04008	-1.32378	-0.253417	1.08203	-0.954856	-2.23723	0.0709985	-2.22814	2.84339	-3.82767	-2.43	1.7378	0.92862	-1.1069	0.554403	0.554403	1.08691	1.11263
171	E2A097	DUF1907 domain-containing protein	-0.352177	0.205124	-0.558437	-0.279717	-0.39145	-1.57855	-1.0233	0.412465	0.479831	-0.801992	1.04386	2.26286	0.711073	-0.303596	0.659003	-1.87528	0.71999	-0.327909	-0.776791	-0.0819039	0.305893	-0.593457	-1.09074	-0.917085	0.591593	-1.0746	1.06653	0.32151	0.29346	-0.229531	0.411801	1.35496	-0.15053	0.349287	0.106021	0.122482	-0.824183	0.143592	1.04982	3.17315	-0.969992	0.033083	-0.284838	-0.368988	0.368988	-1.28402	-1.11255
183	E2A0J3	Histone H3	2.96975	3.836	5.84856	5.84424	2.73562	-0.452948	1.92508	4.04328	1.95591	0.0608548	1.8404	-2.49648	4.28948	-0.737766	2.76199	3.45808	0.730274	2.69101	2.6753	0.9062	3.80999	3.92685	2.13334	1.90175	4.20123	1.83096	3.46923	5.48083	4.22232	3.56067	3.38701	2.14439	5.15703	-0.0295658	0.453835	5.20598	-0.794707	3.69575	0.36526	1.92213	4.26729	4.48097	5.4946	-0.640195	0.640195	-1.05091	-1.10664
641	E2AKD6	V-type proton ATPase proteolipid subunit	7.87715	7.98929	5.15678	6.41155	4.7309	1.04884	4.66072	-0.924427	1.60779	4.07964	6.82663	7.63125	7.04086	-0.966682	1.95617	5.89579	1.03804	6.5169	1.3583	5.61949	6.02579	3.05103	9.69199	7.02889	0.816337	3.33167	-0.76611	6.54369	2.53694	4.69034	6.51797	6.38233	5.62546	7.44621	6.83962	4.25884	6.5978	6.85131	8.76491	3.33417	5.47059	9.14093	6.53858	-0.861706	0.861706	-1.01463	-1.10572
1195	XP_019882425.1 myosin	NA	5.12051	4.9021	3.51488	5.5507	1.86707	0.653661	3.26702	-4.32396	0.18158	-0.561047	2.82601	0.43482	6.775	1.46641	-1.98376	4.36518	-0.637148	2.47138	4.53211	2.27376	4.47988	0.261482	2.82443	4.53521	2.64381	-2.05726	1.72808	5.06131	4.54282	2.14016	2.0472	-2.22159	3.31918	4.72006	5.0946	3.62041	5.00731	5.22652	0.869026	-1.01521	3.52349	5.17171	5.78343	-0.801706	0.801706	-1.01767	-1.10233
702	E2ANM	NA	-0.989337	-1.29634	0.287274	1.09964	-1.96176	0.658949	-1.08552	0.995322	0.134915	-3.49371	0.573763	1.38781	0.564495	0.877491	0.0815968	0.439575	0.38696	-0.583454	0.838082	-0.0268322	-0.30183	0.999892	-1.53871	-3.07787	1.21115	2.72229	1.28739	-3.49498	-0.687188	1.10106	1.05273	-0.767938	-0.231731	-1.34237	-1.05834	-0.678068	0.288329	-0.459805	-3.54785	-1.24293	-0.630011	-1.255	-0.389023	0.47515	0.47515	1.11272	1.09679
278	E2A599	P-type domain-containing protein	-1.15899	-1.05554	-1.70048	0.836062	0.711399	-2.21017	-0.258704	-0.119951	-0.00131071	-1.03419	2.27112	4.32883	1.59885	-0.532302	-0.715031	0.366638	0.994889	0.228987	0.484037	2.27736	-1.28262	-2.10237	-0.817628	0.216091	-0.659549	-0.00607273	-0.20457	0.815258	-0.648179	-1.80009	-0.852181	1.12098	-1.34452	0.209074	0.162376	-3.42715	1.18719	-2.44788	0.265869	-0.299676	-2.16667	1.61628	-0.489632	0.485864	0.485864	1.10467	1.09654
750	E2AR80	J domain-containing protein	-0.79583	-1.23633	0.308225	2.33514	0.911152	-0.531976	-0.0982633	-1.03619	-0.682654	-0.618475	-3.01486	-1.1708	-1.78819	1.20922	1.32111	-4.00095	0.537989	0.597632	-0.77984	0.651167	-1.66093	-1.08081	-0.556207	0.620187	1.28526	-0.812264	-0.801802	-1.46351	0.103384	-1.23933	-0.588919	-1.25383	0.454445	0.610608	0.346955	1.21935	0.533542	1.2635	1.80653	0.764685	1.1468	-2.08499	-2.46796	-0.458248	0.458248	-1.1255	-1.09612
1343	XP_025269493.1 myogenesis-regulating glycosidase-like [Camponotus floridanus]	NA	-2.45107	2.15208	0.632005	1.9137	1.09734	0.839585	-2.57172	-0.202137	1.55517	0.550363	-1.9385	-1.10758	-2.29124	-0.00352808	0.58197	-1.73401	0.0288639	-0.208482	0.856804	0.702627	-1.43649	-1.33131	-0.591065	-2.24263	-1.90926	-1.19141	-3.37638	2.42098	-0.56559	-0.712768	-2.80006	0.120719	-1.26416	-1.48959	-0.626878	-2.00882	0.631896	-0.271155	-0.790701	-1.27475	1.18497	1.05435	1.09677	0.485219	0.485219	1.10312	1.09502
269	E2A4P5	Peptidase S1 domain-containing protein	1.80964	-1.99384	1.82004	-0.780376	-0.27756	-0.346048	0.533822	-0.0308656	0.302503	0.0470439	0.367702	0.585794	-1.09948	-0.213323	2.17523	-0.464405	0.381029	-1.7763	0.529238	-1.73831	-1.77584	-1.40539	-0.640797	-0.406782	-1.88305	0.569885	-0.321985	-2.3146	1.05036	0.812364	-1.22112	-0.722537	-1.00745	1.33295	-0.535371	-0.144587	-1.94398	0.601508	-4.24497	0.0453213	0.051935	-2.04255	0.0934555	0.43806	0.43806	1.13691	1.09074
1318	E2AUN4	Fatty acid synthase	-0.65324	-3.08918	0.307397	-3.6236	-0.126168	-0.259645	-1.29172	0.30319	0.809395	-0.886617	-0.0345493	-1.01544	-3.12475	-0.220881	-2.49452	0.0679564	-0.327369	0.284965	0.52928	-1.61349	-0.755472	0.704641	-0.0875337	0.178513	0.906044	1.18274	-0.688573	-2.72015	0.755246	0.723838	0.238354	-0.250077	-0.634496	1.54205	1.01092	-1.31352	0.70377	0.650857	-5.72236	0.0657176	0.665215	-0.405065	-1.5414	-0.489005	0.489005	-1.09074	-1.08747
259	E2A4G2	T-complex protein 1 subunit gamma	0.153218	-1.80901	-1.29861	-2.72423	-3.0866	1.34222	0.427463	0.0755411	-0.3666	-0.48912	-0.372776	0.564328	-1.83301	0.0649325	1.41298	1.85876	-0.014733	0.44137	-0.228312	-0.396257	-3.63185	0.610395	0.302645	-1.64953	-2.81482	-0.275237	-1.16497	-1.48027	-3.01925	-1.13843	0.603779	1.22863	1.41344	0.104926	-0.163515	-1.34106	0.287431	-1.29172	-1.08727	0.634682	-1.87436	-1.13763	-2.92525	0.463336	0.463336	1.10877	1.08706
1103	XP_011262260.1 heterogeneous nuclear ribonucleoprotein R isoform X2 [Camponotus floridanus]	NA	-0.151633	-0.446947	-1.05397	0.120467	-0.589399	2.1482	-0.573137	-0.417479	0.430476	-0.335389	0.758878	-1.10895	-0.0906941	0.124581	-0.873711	0.475371	0.0668985	0.10742	0.761563	0.101717	-0.395159	0.855292	-2.52598	-1.2727	-0.493207	-1.38225	-0.552766	-1.22233	-0.675219	-0.0769748	0.138696	-2.18246	1.11363	1.55155	0.920948	0.4752	-2.16215	-1.11225	-1.58383	0.454813	-1.96828	0.0655975	0.221657	0.373569	0.373569	1.224	1.08646
877	E2AX68	GOLD domain-containing protein	0.13985	0.278634	-0.510485	-0.215963	0.748811	0.257154	0.223204	2.03817	-0.311955	-0.745367	-0.475671	0.0671126	-0.21713	-1.79588	0.917915	-3.18982	-0.485016	2.13628	0.732657	0.507096	-1.92413	1.66492	0.179729	-0.0363133	-1.14237	-0.170242	-1.13128	1.20231	-0.302837	-2.75788	1.36706	-1.26667	1.24276	-0.877378	-2.73448	1.93467	-1.13551	-0.199913	-2.38916	-0.292118	0.0234611	0.47609	-0.517986	0.436265	0.436265	1.13238	1.08635
653	E2AL33	WD_REPEATS_REGION domain-containing protein	0.322808	-2.02134	-1.60933	0.193471	-2.32897	1.05191	-3.6139	2.28161	0.0307902	-1.43597	0.375521	-0.42665	-1.75389	-1.45231	-3.1436	1.62868	0.0418232	1.59378	1.81066	-1.18793	-1.48996	-0.784043	0.100331	-1.26881	-0.529775	-0.89029	0.113774	0.904163	-2.36251	1.83807	0.586963	-1.64072	2.26119	2.00699	-0.863281	0.478407	0.38072	1.46287	-1.38303	1.43623	-0.871978	-1.70969	-0.349038	-0.493775	0.493775	-1.08161	-1.08274
849	E2AVX1	Elongation factor 1-gamma	0.249679	-0.155147	-1.59239	0.141993	-0.19358	1.89956	0.233168	0.108994	-3.30766	0.581232	0.929686	5.03512	0.838382	-2.35319	-5.56409	-2.15098	-0.436977	-1.38063	1.11085	-0.833746	-2.68341	1.69774	0.995987	-1.58987	0.131729	0.833278	0.00172511	3.3807	1.29262	0.0296441	-1.85831	0.404819	0.718198	-0.397684	-0.137721	-0.711723	-4.82584	2.19892	1.23455	1.42361	1.20606	2.03584	0.996048	-0.615262	0.615262	-1.03117	-1.08273
1025	XP_025264964.1 transmembrane	NA	-1.52388	-1.95089	-0.0499662	-2.71686	-2.50427	-1.00506	-1.3097	-1.56339	0.0821502	-1.09002	0.999289	0.290379	-2.05954	-1.2733	0.524777	2.62831	-0.0903087	1.15124	-0.475681	-2.95198	-0.737273	0.0247082	-0.943636	1.34437	0.879078	-2.10722	1.35659	-3.46272	-0.851799	-0.854481	-0.927996	2.38343	-1.49617	-1.33807	-0.926579	1.89688	-1.38585	0.91915	-0.256965	0.524548	0.225356	-1.69184	0.894737	-0.475566	0.475566	-1.09289	-1.08212
1083	XP_011259083.2 LOW QUALITY PROTEIN: eukaryotic translation initiation factor 3 subunit A [Camponotus floridanus]	NA	1.50452	-0.49697	-0.0210387	0.147535	0.0285018	-1.62072	2.58653	-0.155852	0.869697	-1.12713	0.0141927	-2.88082	0.262619	-0.819604	0.910351	0.0367142	-0.829473	0.00505287	-1.27609	-0.772316	-0.00391323	0.738859	0.519765	-2.62986	0.844679	-1.64601	0.577914	-2.78871	-0.842827	1.90354	1.01134	-0.9957	2.64805	0.0198007	-0.604594	0.0146363	-1.41451	0.594633	-4.32688	-1.13348	1.87556	-4.48139	-0.834604	0.50696	0.50696	1.06903	1.07886
187	E2A0Q8	Transgelin	-1.06525	0.362244	-0.399672	0.424126	-1.45851	0.973081	-0.398982	-0.595724	-0.681753	-2.1056	0.791679	0.432357	3.47446	1.62226	0.374092	1.51153	-4.81651	-1.90342	3.27318	-1.02814	-0.836107	-0.206088	1.20001	0.677975	3.15335	-0.184372	0.59857	0.257015	0.308832	1.77355	-2.04722	0.933078	-1.69815	-0.677247	-0.837878	-1.04816	-0.404353	1.14801	1.77394	-0.470258	2.86052	2.20397	1.26547	-0.525277	0.525277	-1.05874	-1.07815
404	E2AAJ7	Cytochrome c oxidase subunit 7C, mitochondrial	1.86841	-2.19689	2.32675	-0.771454	0.710587	1.74992	0.786874	-0.532316	-1.47016	1.48751	1.67368	-1.31136	0.247017	0.972958	0.20267	-2.56193	-1.37338	2.45871	1.89287	-0.862464	0.0437051	-0.703618	0.104038	0.0378271	1.79885	0.764411	-0.631452	-2.02504	-1.2252	-0.915272	0.913024	0.274889	-0.70582	1.69233	-2.3974	1.99226	-1.66207	0.124988	-2.74123	1.04347	0.558406	-0.520715	-1.83525	0.47913	0.47913	1.08468	1.07777
368	E2A9I6	Sphingomyelin phosphodiesterase	-1.66706	-1.42036	-2.14529	-1.98304	-0.972358	-0.279152	2.10755	1.09722	-2.00914	-0.852269	-0.570018	-1.21296	-0.424995	0.726936	-0.604496	-0.0428616	0.4745	-2.67663	0.597874	0.361802	0.163219	0.0450104	-1.31758	-2.07613	-0.377953	0.253864	-1.4127	4.05184	1.02293	1.75025	-3.80283	-0.60412	1.10429	0.62647	-0.429353	0.657011	0.191024	-1.10276	1.57856	-2.23085	-0.0513788	-0.731219	0.113175	-0.474509	0.474509	-1.08668	-1.07686
654	E2ALD1	Uncharacterized protein	-1.05384	-1.58228	2.37645	0.874226	-1.90954	0.687664	-2.2522	-0.339915	-0.0419951	1.26754	0.328138	-1.90178	-2.186	2.43695	-1.88556	-1.64634	-0.860183	-1.27279	-0.406754	-0.743662	-0.517858	-1.60276	-1.67596	1.37431	1.34533	-1.13866	0.779243	-2.20933	-0.41545	-0.626039	-0.16553	0.852922	-0.39662	0.288807	0.648383	-1.23515	-0.580664	0.883486	-1.45998	2.15348	-1.59808	0.407393	-2.11383	-0.444416	0.444416	-1.10839	-1.07509
577	E2AHV3	Ribosomal_L16 domain-containing protein	0.104252	1.79845	0.579524	2.5475	0.875815	0.239098	-0.144265	-0.37637	-1.5101	1.78409	1.26709	2.50838	-0.319209	0.783162	0.948284	0.965798	-0.648792	-0.772598	1.06103	-0.653619	1.60046	-0.488287	1.16763	-1.61265	2.33571	0.587224	-2.79215	3.14851	1.63169	1.71843	2.77029	-0.925517	1.33318	-0.131419	0.91504	2.55461	3.4535	2.94963	1.42681	1.4253	-1.02483	2.30462	-0.954152	-0.476677	0.476677	-1.0823	-1.07467
584	E2AI63	Chitin-binding type-2 domain-containing protein	-0.186289	-0.278317	0.906015	0.190459	0.0783889	-0.189843	-0.959161	0.956006	-0.803626	-0.246268	0.849291	1.67486	-1.66707	-0.157306	-0.154411	0.960271	2.54958	-1.90281	0.4156	1.71747	-1.91534	0.212999	-1.57036	-1.65943	1.98612	-1.60972	0.976238	-3.79864	-0.0654962	2.23599	0.262184	0.163801	-0.602204	-0.684624	0.535104	-1.19051	-0.195112	2.13176	-3.6505	-1.17716	-2.31782	-0.351596	-0.0113193	0.472021	0.472021	1.08333	1.07299
1055	XP_011255603	NA	-0.712889	-0.669395	-1.23794	0.818645	-0.120578	2.20166	-0.944125	-1.65053	-0.787699	-0.563036	1.87919	-0.280572	1.09818	0.663123	-0.441492	-0.418025	-0.529306	0.789516	0.108193	0.999707	0.741955	-0.188535	-1.30115	-1.51413	2.09695	-1.62597	1.2488	-2.44182	1.00066	-1.33803	-0.308993	-2.19488	-0.270405	1.13259	0.368931	1.19158	-1.87521	-1.65184	-2.59651	0.617712	-1.28826	-1.24807	1.62221	0.430035	0.430035	1.11749	1.07172
1012	E2A3R3	Adenosylhomocysteinase	-0.0738741	-0.0486744	-0.631849	-2.79247	0.189678	-1.13158	1.82948	0.495172	-1.5009	0.265033	0.797936	1.42596	-0.333552	0.083244	-0.219767	-1.28797	2.6981	-1.15409	-1.09662	-3.1875	-2.39035	0.695485	0.155074	2.2281	1.51393	-0.936827	0.674942	3.8637	-0.356447	-1.7198	0.42928	-1.60431	-0.863846	-0.71221	-0.246216	-0.92358	-1.14302	0.42274	0.873162	0.658767	-0.765579	2.35993	-0.572548	-0.472663	0.472663	-1.07973	-1.0706
757	E2ARG0	Acetylcholine receptor subunit alpha-like 2	-0.506048	-1.02526	-0.995845	-3.05923	-0.131937	0.467244	-0.159345	-1.4189	0.267607	-0.791483	-1.05881	-0.686804	1.17046	0.214003	0.058928	0.734794	1.86652	-2.70656	-2.53191	-0.91196	-0.746627	-0.520508	0.0731763	0.353828	1.73804	0.680289	1.98316	-3.81727	-1.09521	1.13134	1.18213	-0.307927	-1.49947	-0.867717	0.588883	1.07932	1.18995	-1.7233	-3.8475	0.466932	1.49933	1.22474	-1.25153	-0.474466	0.474466	-1.07388	-1.06709
351	E2A8S6	Aamy domain-containing protein	0.876177	-1.96948	-1.15004	0.751581	-0.728065	-0.85603	1.33389	0.615066	0.472597	2.59882	-1.02462	-1.92853	-0.126565	2.26237	0.379535	-0.439456	-0.783534	-0.834866	1.62659	-1.52308	-2.11933	1.16612	0.0465457	-3.3637	-1.0921	-1.62282	1.88951	-2.53534	-1.91356	-0.111342	1.88109	-0.178795	-0.0195487	-0.599087	-1.00568	0.235791	1.35891	-1.03249	-2.93657	0.805314	0.00430534	-1.30979	1.0299	0.466917	0.466917	1.07682	1.06532
747	E2AR45	SoHo domain-containing protein	0.726094	-1.75464	0.448091	-0.939482	-2.55193	-0.436304	-1.48473	-0.314379	-3.62202	-0.769431	-3.00022	0.172904	0.329555	0.274556	-0.805895	-0.903992	-1.42098	-1.26301	-3.30352	-2.61703	-1.37888	-0.700888	1.43893	-0.30177	-1.93577	-0.763934	-1.78201	-1.32379	-0.32988	-0.909457	-0.0329604	-1.17763	-2.3469	-1.24095	-0.677302	-2.01206	-1.70483	-0.743891	-3.25083	-2.70792	-1.33644	-3.4652	-0.854171	0.406745	0.406745	1.13329	1.06451
1061	E2ADQ2	Glucose-6-phosphate 1-epimerase	-2.70693	-1.50775	1.04805	-0.346064	-0.259616	1.34784	-0.45803	2.00716	-0.70584	0.714436	2.32533	-0.284157	-2.3036	-1.0875	-1.41412	0.822396	-0.54757	0.0829289	-0.657494	2.27049	-0.883046	-0.886117	-1.30115	-2.03058	1.88811	-0.44264	2.08763	0.553545	-0.173955	-0.0662893	-0.18744	0.580111	-0.469125	0.681615	1.42485	1.6173	0.0985858	1.18763	-0.86702	-0.49319	-0.455236	-0.711263	0.0160038	-0.417599	0.417599	-1.11705	-1.06235
191	XP_0112	NA	0.109654	-1.156	-0.977946	0.66928	0.607702	-1.63237	-0.710266	-0.343419	0.0664227	1.74367	1.49315	-0.624416	0.480044	-1.99618	1.02249	0.405801	0.32725	-0.67543	0.197879	1.85927	-0.454114	-0.0626992	-0.949964	-3.05122	0.43304	-0.349313	-1.64785	-1.6266	0.0925185	0.541603	0.487939	0.399335	1.06609	-0.29943	0.739595	0.318442	-0.164998	-1.47328	-3.46976	-0.0484686	0.492386	-0.809076	-0.0221925	0.393467	0.393467	1.14465	1.06032
193	E2A131	EGF_CA domain-containing protein	-0.463503	-0.509408	-0.0586638	0.283907	-2.23727	0.619313	0.791743	-1.71666	-1.77443	0.384182	0.502137	-1.65924	1.9873	-1.54632	0.900541	1.27378	0.766955	-1.3362	-0.457697	0.505529	-2.18292	0.494267	0.66954	1.52073	-1.29125	0.624996	-1.42428	-2.24388	-1.83363	-0.117392	0.437331	-1.06684	-0.39044	-1.04216	-0.477497	0.552596	0.271693	-0.420654	-3.58032	-1.63152	-0.728308	0.170864	0.325511	0.410131	0.410131	1.12209	1.05994
774	E2AS00	Calumenin	2.69759	-1.49848	0.993018	-1.0925	-2.44776	-1.68095	-0.876409	2.01491	-0.98904	-1.72105	-0.121447	-2.62039	-0.0728352	-0.0915965	1.61177	-1.10518	-0.791832	0.000268094	-0.34363	-0.0609051	0.378366	-1.5146	-1.38782	-2.04929	2.21941	-0.404937	1.09889	-0.0568607	-0.238757	0.155181	-0.420298	1.06244	-1.19339	0.405028	-0.597461	1.68513	0.499528	-0.0630629	-2.07627	-0.00279617	-0.141165	0.661927	-1.42892	-0.421825	0.421825	-1.1059	-1.05793
1269	XP_0252	NA	0.532726	-1.16014	-0.712924	-1.5075	-0.618063	2.30675	1.33066	0.273613	3.49933	-1.26039	-1.21521	-0.710377	0.261654	2.00053	1.73446	-2.16306	-0.709442	2.67169	-0.264559	1.42017	0	-2.9474	-0.522515	-1.0672	-2.1439	-0.752248	0.461993	1.31595	0.0475642	-0.938328	-0.0198277	-0.785008	-1.90335	-4.18149	-0.818507	-2.64979	-0.0286787	0.39184	4.98899	-0.186104	0.894523	-0.250964	-1.13902	0.535568	0.535568	1.02414	1.05309
1096	E2ANS3	Neural-cadherin	-2.36165	-2.43574	1.11671	0.877273	-0.89619	0.325572	-1.34386	0.654164	1.19596	-1.55243	-2.85921	-2.09196	-0.938803	-1.35695	-0.936146	-1.07295	1.78308	-4.20903	-0.687201	-2.70575	-0.291121	-0.515331	-1.27614	-3.0829	-2.29669	1.27972	-1.75351	-1.36655	-0.643255	-1.07665	-1.81216	0.849328	-0.63728	0.103399	-0.941895	-5.24182	-1.06059	0.22189	-3.38594	-3.58443	-1.85774	-1.09138	-1.10332	0.485926	0.485926	1.04554	1.05069
1345	E1ZY91	Phospholipid-transporting ATPase	-2.44516	-3.49688	-0.484185	-2.3504	-0.0909781	0.0618972	-0.603844	-0.27617	1.2688	0.510343	-0.562666	-0.359162	-1.82879	-0.967054	1.09887	0.199508	2.14429	0.656279	1.36426	-2.05952	4.00077	-3.41249	0.542704	1.17361	0.300758	-0.764958	-3.25419	-3.62492	-1.35013	-1.93916	-2.18325	-0.784223	1.98104	0.138409	-0.8739	-0.997228	-0.930376	-0.0890087	-0.56804	-2.05337	0.26969	-0.729297	0.0174512	0.504811	0.504811	1.0347	1.05023
429	XP_011255071.1 solute carrier organic anion transporter fami	NA	-0.412559	0.0587011	1.37617	1.16279	0.774054	2.49926	1.60375	0.675913	0.791561	-1.27075	0.402978	-2.84322	-0.768717	-0.404154	-2.20898	-0.432162	2.32682	1.71656	1.57181	-0.439187	1.19745	0.236046	-1.07251	-0.522895	-0.675785	-0.440935	0.202514	0.677839	0.718752	0.440799	-2.57045	-0.047748	1.53615	-0.671549	-1.4813	0.538417	-0.36169	0.656772	-3.10645	-0.0115598	2.08804	0.0830529	0	0.43182	0.43182	1.08409	1.04966
1161	E2B0R2	NA	-0.686627	-1.11471	-2.8467	1.06287	1.17733	-2.07984	0.237232	-2.65876	-1.19095	-2.48162	0.821236	3.51857	1.61182	-0.796384	-2.60065	-0.256703	-2.11138	-2.92173	-0.00454982	-1.3899	-1.61659	0.698811	-0.0752281	-0.359295	-1.14266	0.222463	-1.48093	0.524712	-0.915351	1.10244	-2.87808	-0.176695	-2.25972	-1.13103	-1.08187	-3.37547	-1.85527	-5.00977	-1.96507	-0.649826	-1.16271	-0.305553	0.278143	0.498275	0.498275	1.03576	1.04835
340	E2A880	Filamin-B	-2.29054	-1.7512	-0.0025832	-4.9086	0.931701	-4.97698	-3.74458	-5.2699	-2.03004	-5.7461	-3.63071	0.209647	1.59229	-0.468267	0.543002	2.49626	1.64521	-1.13607	-4.13137	-1.41822	-3.73353	-0.38206	-5.57638	-2.70227	-0.290566	-2.15572	-1.95194	0.837054	-0.909836	-0.255621	-1.79718	-0.320045	0.203818	0.148438	-1.78549	-5.53068	-2.08691	-0.275536	-4.80321	0.44153	-1.52111	0.820934	-0.930816	-0.660178	0.660178	-0.978481	-1.04362
1247	XP_025263076.1 maltase 1-like [Camponotus floridanus]	NA	10.6272	9.78638	8.08977	3.92999	8.32149	5.50016	10.227	3.2174	10.0179	10.2497	10.1471	7.80866	10.0858	9.04265	3.99076	10.2983	6.7747	10.1771	8.45793	10.8777	9.37966	8.45753	9.87216	9.65345	9.49792	11.1966	5.7425	7.02253	10.9629	10.1827	4.79427	11.2413	9.62851	10.6318	9.40122	8.19011	9.85548	10.2926	6.93577	6.26251	11.1344	9.16703	10.9856	-0.64604	0.64604	-0.980676	-1.04306
516	E2AEJ2	Eukaryotic translation initiation factor 5A	-1.48592	1.17988	-0.907533	0.120019	0.371052	-0.181119	-0.709663	0.599189	0.666969	0.460494	0.839726	-1.57889	-1.94145	-0.00448349	0.744248	0.900011	-0.965786	0.015314	0.986001	-0.326297	-0.855375	-2.29318	0.106469	0.151076	-0.131702	1.57913	0.195229	-0.61437	1.21471	-0.518187	2.26964	2.31897	-1.03479	0.721127	1.96144	-0.0575552	-0.884513	0.58115	-0.66779	-0.634834	-0.914755	-1.93852	0.243666	-0.377187	0.377187	-1.13742	-1.04084
923	E2AZ59	Peptidase A1 domain-containing protein	12.2362	12.0178	11.814	10.8916	10.5495	11.298	11.8615	12.2303	11.7895	11.8536	11.4812	10.6294	12.1096	12.3786	11.6453	12.9385	11.5073	11.5191	10.5437	12.4436	12.03	12.225	12.7589	12.1073	11.4439	11.1335	10.2012	9.51733	12.5202	12.1602	10.5695	12.5539	11.4251	11.7953	12.2594	10.9252	11.9187	11.468	8.84666	11.226	12.7469	11.0441	12.9624	0.330596	0.330596	1.23782	1.03903
1113	XP_011263221.1 uncharacterized protein LOC105255577 [Camponotus floridanus]	NA	0.0109504	-1.71519	-0.242142	-0.864412	1.13084	0.724901	-0.828514	2.43008	1.79646	0.307363	-1.75399	-1.06157	-0.580197	-0.454	0.587637	-0.149133	0.0248006	-0.93233	1.60532	-1.66562	-1.21418	-0.298536	-0.229321	-2.01335	-1.41671	-1.6305	3.28842	-3.0919	1.226	0.370148	-2.28983	-0.445744	0.853837	-1.55209	0.617787	0.489254	-2.26964	-0.83384	-2.34069	2.95109	-0.251999	-1.55107	-2.40165	0.468069	0.468069	1.04159	1.03902
1306	E2AMN5	Uncharacterized protein	-1.82783	2.59008	3.35263	-2.21194	-0.802486	2.29289	0.480056	1.60841	-0.964296	2.43161	1.25369	1.60816	-1.27797	1.91711	2.60939	2.26008	1.90176	1.43195	-3.5431	-0.551306	1.3556	-2.32204	2.86089	-1.71812	1.27665	-0.955899	-0.863839	1.41575	-0.814075	-0.738696	0.467751	-0.285154	0.545996	1.05615	0.518099	1.76252	0.865881	-0.427452	1.33553	0.939923	2.37976	-1.25549	-1.4712	0.513658	0.513658	1.01636	1.03863
629	E2AJX9	Glucosamine-6-phosphate isomerase	0.500933	-1.17215	1.38133	-3.20955	-0.934948	-1.57226	-1.03002	0.21241	1.1744	1.24161	0.238258	3.70922	0.530556	-1.83659	1.70568	-1.59403	0.723424	-1.90074	-1.96014	-3.38584	-1.24606	1.68142	-0.627457	-2.9078	0	-0.0570569	-0.063283	1.92545	-2.8327	-0.479206	-3.08953	-0.162989	-1.51953	0.0261894	-1.97733	-1.62957	-1.02831	-0.805165	0.910937	-0.974755	0.647326	-1.72719	-0.433412	0.488438	0.488438	1.02891	1.03859
1131	XP_011264789.1 sodium/	NA	-1.74753	0.348484	0.830237	-0.704035	0.0143502	0.133052	-1.24246	-0.335845	0.505268	-1.06837	-2.01335	0.485643	-0.508695	0.208731	1.01931	-0.388363	1.20714	0.875293	-1.66519	0.145371	1.34173	-0.922706	0.185306	-0.371712	0.216059	-0.781527	0.461108	-1.31986	-0.396032	1.42071	1.26876	2.09693	0.887056	0.0866455	0.475489	-0.401168	0.865323	0.7127	-0.615584	0.92913	-0.324631	0.251348	-1.44113	-0.344312	0.344312	-1.19365	-1.03587
1370	E2A165	Uncharacterized protein	-2.05165	0.166446	0.152697	0.752325	0.934773	1.5261	-2.35984	0.529226	-0.100106	0.0780202	-1.09071	1.40778	-2.09935	-2.03135	-0.252192	-2.23839	0.618572	-0.103558	-0.306934	1.01516	0.0672259	1.13717	1.80132	0.0357316	-1.22715	-0.411678	-2.8343	-0.757189	-0.904352	1.30181	-0.0930744	-0.190121	0.822716	-0.0264467	0.458031	0.0221194	-1.47982	0.655569	-3.58227	-1.34755	-0.665424	-0.997263	0.82633	0.413313	0.413313	1.08041	1.03441
260	E2A4H1	26S proteasome non-ATPase regulatory subunit 2	-1.68014	-1.14562	-0.0547715	-4.09785	-0.549538	-2.74952	-3.6748	2.59221	-1.11359	1.04734	-1.72748	-1.12616	-0.441068	-0.0672562	-4.27312	0.027532	1.78026	0.0964535	0.639743	-0.747557	-3.20617	-0.140039	-1.28995	-0.0127674	0.925654	1.33885	1.49712	-1.18379	-0.349879	0.298142	0.176123	-1.53483	0.30971	-2.06543	-0.234548	-0.354291	-2.1329	-1.43917	-1.7405	0.537818	-0.684091	-2.28992	-0.568243	-0.476873	0.476873	-1.02896	-1.0334
1077	E2AHG1	Uncharacterized protein	4.36047	1.35445	1.0739	-1.20484	0.439291	0.464737	-0.713756	0.689301	1.99179	-1.59226	-0.239821	6.80883	1.97882	0.454798	0.211091	1.9603	1.10888	1.87747	-2.60894	-3.31608	-0.338472	-0.181197	3.56419	-0.863458	2.61873	-0.190273	3.09602	5.36047	2.27974	-2.29772	1.93186	-1.73853	2.24316	2.17069	1.58733	2.80377	3.4333	-1.6903	3.99834	1.10718	-1.6348	3.4564	1.07319	-0.648431	0.648431	-0.96876	-1.03231
413	E2AB23	Aldo_ket_red domain-containing protein	3.79721	1.34131	-0.0842748	1.90119	0.467348	-0.126892	-0.133642	0.169439	-3.79339	-1.17348	3.13466	7.66684	4.2975	0.969886	3.02464	-0.110825	-4.31436	0.166794	-3.08987	1.79078	2.26937	0.266449	1.65444	1.99315	0.686455	0.557076	-2.29827	6.27586	0.705336	-0.165783	3.92135	0.899262	3.89051	0.137886	0.925879	1.93719	2.20905	1.2277	5.95077	-0.0399203	-0.0267289	3.46137	-0.510287	-0.713366	0.713366	-0.955562	-1.03001
401	E2AAI7	Ras-related protein Rac1	0.649318	1.58286	-3.07438	0.0335647	-0.451655	-1.04431	-0.8178	1.75291	0.606878	0.785561	-1.36575	1.05383	0.782604	-2.46551	2.42935	-1.24034	-2.71503	-0.801701	-0.517485	0.305455	0.22184	-0.730481	3.13751	0.643704	-0.257093	-2.0809	-1.01695	1.36965	-0.91964	0.513156	0.215666	1.18523	1.47349	-1.63791	0.430444	-0.591076	1.21489	-0.425546	2.65414	1.38645	-1.25092	2.21633	2.54821	-0.465425	0.465425	-1.02474	-1.02465
216	E2A1Y1	Vacuolar protein sorting-associating protein 4A	-1.85266	-0.075638	2.62618	0.231677	0.852496	1.11184	-1.1497	0.220227	0.0719391	-0.709425	-0.69479	-2.22551	-0.973079	-1.5846	-3.31904	0.848559	0.417836	0.838765	2.08828	0.205436	-1.28611	-1.46183	1.80676	-1.46225	-1.26382	-0.207361	1.12678	-3.11726	-0.868137	0.766361	0.157689	-1.89962	-0.373934	1.36381	0.507997	-2.70573	-0.455148	-0.42687	0.358982	-1.2371	-1.77651	-1.14242	0.501704	0.43319	0.43319	1.04624	1.02335
929	E2AZG3	Cdc42-like protein	-2.48629	-1.37134	-0.905262	-0.97502	0.387368	1.03265	0.903612	1.10547	0.306892	0.224913	-1.70527	-1.02393	-1.59329	-0.412908	-0.911843	0.0310233	-0.241774	-0.152479	-0.573397	1.27922	0.956401	1.02328	-0.44679	-1.41764	0.565066	1.31839	-1.24942	-1.29247	-0.838	-0.0250727	1.18511	1.89157	-0.847353	-0.0685926	0.0593699	0.875615	1.49872	0.688749	0.735452	-1.1612	0.00578611	-1.09337	1.65905	-0.365738	0.365738	-1.12538	-1.02252
1233	XP_025262697.1 UDP-glucuronosylt	NA	1.45777	-1.05474	-1.59584	0.238088	-0.597438	0.0390831	1.85011	0.123831	1.80754	0.165705	0.439117	-0.604332	-1.09176	-1.74153	0.0784623	0.325917	0.620226	-1.9499	-1.83222	-0.872605	1.58258	-0.074729	0.250798	0.938075	1.2689	1.17823	0.76133	2.5164	1.27685	-0.073339	2.51131	0.51604	1.53613	-2.41163	0.940756	-0.35562	-0.608929	-1.38415	-1.70521	0.68889	0.358823	0.174632	-2.05439	-0.409563	0.409563	-1.06522	-1.02134
1056	E2ACP6	CD109 antigen	0.941098	0.735289	-3.41346	-3.17491	-2.31003	0.023763	-1.08142	-4.28277	0.0318173	0.870482	-3.85183	0.896923	0.0781242	0.576621	0.567953	-0.0475421	-5.22057	-3.85145	-2.16716	-3.27568	-3.07374	-1.25695	-0.797731	-1.16924	0.931316	-0.223832	-4.3817	-1.05589	-0.766896	-0.091347	-4.00291	-0.853056	-1.89217	-0.549413	0.770927	-0.643454	-1.95827	2.4555	-2.2236	1.15185	-0.615332	-2.1869	-0.48559	-0.548899	0.548899	-0.981388	-1.02054
495	E2AE39	Density-regulated protein	0.136881	1.31536	-1.3704	-0.194864	2.50126	-0.814944	-1.39593	-0.917644	2.03399	-0.922125	0.0978313	-1.78154	-1.70795	0.408784	-0.0213887	-0.185921	0.956676	0.141968	-0.422388	0.472575	-1.57446	3.09307	0.246206	-0.767694	0.574296	-0.641539	1.91465	-3.14201	1.49827	0.0411303	-1.32633	-0.0312683	-1.6361	-3.93394	-0.765496	0.295169	0.258367	-0.47423	-2.87143	1.45021	1.0224	-0.330622	-0.0329717	0.449088	0.449088	1.02836	1.01909
690	E2AMV4	HATPase_c domain-containing protein	4.63451	3.53888	0.244417	3.97867	-0.522468	-0.906617	-0.290745	-2.72333	-5.04572	-2.47816	-2.69563	-2.44347	3.47897	-3.20865	-0.816394	-3.55156	-2.68588	2.73565	-5.48515	2.14568	3.38279	-2.84899	2.68853	2.90098	1.01623	2.17574	-1.75038	2.80466	1.03354	3.57343	1.06663	-0.512317	-2.91488	-2.89277	0.49149	0.082664	0.44318	-2.67915	1.58639	-0.783495	-0.519427	4.56381	-1.8778	-0.776282	0.776282	-0.936605	-1.01877
1093	E1ZXK2	Lysosomal Pro-X carboxypeptidase	0.80808	-1.62773	-1.21057	-3.5276	-0.188862	-0.41112	-0.419234	-1.13913	0.155027	-0.808061	0.206468	5.27399	-0.861949	0.534074	-1.87625	-0.426174	-0.372209	0.0894256	0.270616	-3.58402	0.991503	-0.609759	0.990558	0.873909	0.673651	-3.30325	2.18885	3.72021	-1.95552	-0.693211	2.0628	-0.09279	0.0444008	-0.0958423	-0.478113	-1.40157	-2.07981	1.15339	3.70934	-2.41479	-0.501664	1.86185	0.890242	-0.544752	0.544752	-0.980552	-1.01858
104	E1ZX53	Dihydrolipoyl dehydrogenase	-0.897159	-2.13028	-0.782291	1.23239	-1.37547	-0.00522317	0.477924	-1.03941	0.508625	-1.10271	0.236472	3.39352	-0.705369	0.818083	-1.14886	-1.50422	1.31597	-1.39795	-0.498533	-2.30568	-1.10092	1.15819	-1.35491	0.655137	-0.261607	-1.41725	1.38104	1.73114	-0.801513	-0.325364	0.535658	0.129133	0.453312	-0.168442	0.200812	0.537132	-0.993956	-1.4315	0.124816	-0.964984	0.209411	2.00954	-0.940863	-0.389944	0.389944	-1.0804	-1.01661
181	E2AUU5	Histone H2A	7.0697	4.12528	5.39318	4.74525	1.55521	-3.6803	3.20278	-0.262958	2.1041	2.08984	2.08814	6.8018	6.57162	0.406693	2.3876	2.85245	1.93236	2.1541	1.83557	2.65403	4.21472	3.64633	2.3842	1.32014	3.44413	3.45444	3.05763	6.22399	4.44644	2.6006	5.28394	1.89426	5.07722	0.862647	2.66112	3.97003	4.39786	2.93244	2.17091	1.89804	5.02271	4.60957	4.14196	-0.592125	0.592125	-0.96338	-1.0157
299	E2A688	Vacuolar protein sorting-associated protein 28 homolog	-0.431529	-1.21783	-0.971623	1.1937	0.314682	0.299827	-1.51301	0.311162	-0.941174	0.972984	-0.919228	-0.901213	-0.366369	-1.79128	-0.566625	-0.323103	0.166493	-0.0642222	2.01616	0.708567	-0.285113	2.27948	0.890979	0.129124	1.26506	1.33068	-0.54902	-2.85768	2.69636	-0.0556341	-0.991853	-1.2182	-2.2219	-1.88248	-0.878246	0.256195	-0.273257	-3.66773	0.0845495	0.2081	-1.23354	0.605464	0.0424778	0.411086	0.411086	1.05476	1.01518
953	E2B168	Prostatic acid phosphatase	-0.847524	2.77631	0.473686	0.424518	1.3014	0.23746	1.27603	1.98781	1.27909	1.60853	0.859082	-1.31024	-1.95152	-2.03338	1.11234	2.80356	1.66639	-0.261073	-1.38466	-1.36002	0.0646376	0.59686	0.306074	-0.657844	-0.565929	-2.37925	1.35758	2.33171	0.433373	1.94796	-0.451528	3.03473	-1.34249	-1.69159	-1.23623	-0.924693	-1.32569	-1.82668	3.19468	1.79458	-1.60641	-0.904059	-0.339888	0.476377	0.476377	1.00259	1.01222
107	E1ZX89	Superoxide dismutase	-0.102935	-0.266006	-1.13465	-0.56131	2.60934	-0.00442866	-1.33241	0.297004	0.921101	0.189698	0.316274	-3.22802	1.62023	-1.51647	-0.993477	-1.744	-1.28974	-0.269129	0.98105	-0.863932	-1.28778	0.35165	-2.1436	-0.294502	0.884849	0.630909	0.716493	1.83189	0.0692902	-1.44584	-0.269177	0.3412	-0.0690269	-0.424983	-1.06319	-0.292982	-0.136605	-1.52068	0.104225	0.0539311	0.393099	-0.707583	0.316834	-0.366845	0.366845	-1.10278	-1.01024
1024	XP_011251828.1 inosine-uridine preferring nucleoside hydrolase-like [Cam	NA	-2.52783	-0.26028	-0.243	-1.58447	-0.987631	-0.607773	-1.37212	-0.335777	1.60255	1.53193	-0.371141	0.827739	0.221436	0.0110363	1.10936	1.32744	1.14073	-0.397003	-2.06135	1.07548	1.61408	1.46439	-2.2253	0.454677	-0.199244	-0.14101	-0.434692	0.587845	-1.82084	0.638966	-1.47272	-0.598429	-0.558148	-0.937284	-0.205602	-0.929189	-0.097404	-0.282538	-3.25715	0.763528	-1.539	-0.247553	1.5392	0.391286	0.391286	1.06616	1.00836
199	E2A1A9	Lipase	1.233	0.113087	-1.21241	-1.01356	1.87989	-1.6391	2.35095	-0.155454	-2.34899	0.691437	-0.136624	-2.85666	-1.19394	1.64796	0.0714386	-1.67852	-2.30757	1.03161	-1.33972	-0.187034	-1.44261	0.378453	-1.29324	-0.801087	0.429614	1.03069	-0.461319	1.11206	0.941765	-1.28465	0.206468	1.26295	0	0.838732	0.322538	0.102804	-0.893823	-1.1179	-2.37869	0.37282	-0.173228	0.187436	0.0484885	-0.39631	0.39631	-1.0588	-1.00732
674	E2AM21	NA	-0.173642	-1.9291	-0.18752	0.256765	0.941663	-1.90436	2.8204	-1.8553	-0.570536	-0.0489547	-0.610509	-1.8451	-2.33456	-0.930378	-0.980867	-1.67729	-2.15918	-0.960957	1.93156	-2.02072	0.0711601	2.65433	0.63889	-1.24948	-0.0323961	0.181291	-0.148679	-2.91572	-2.38456	-0.229106	-3.30607	0.806618	0.947573	0.0643713	-0.78815	-2.63994	0.448046	-1.26481	-3.45064	-0.252721	0.302565	-1.85597	-0.605034	0.445849	0.445849	1.00453	0.999229
435	E2ABW5	Tyrosine--tRNA ligase	-1.44448	-0.290999	-0.106078	0.100769	-0.225552	-1.78801	-1.90652	0.554567	1.27863	0.302104	1.19347	0.0635156	0.737571	-1.82846	-2.39468	-0.735787	-0.255605	0.832744	0.774304	-0.451486	-0.362903	-1.1111	-0.626183	-0.724778	1.95435	-1.09641	0.369959	-0.0865738	-1.62464	-0.166669	-1.72691	-2.7601	-0.440028	-0.616928	-0.944415	-2.08925	-0.953843	1.12932	-0.701389	-0.0346333	-1.75601	-1.7045	0.0977756	0.359429	0.359429	1.09463	0.998221
620	E2AJP6	MFS_1_like domain-containing protein	0.257838	-1.67621	-0.230501	-1.07018	0.380346	0.672227	-0.541033	-0.979433	1.12264	-0.956908	3.38637	-2.1074	-0.533756	0.882455	-0.129392	-0.944207	0.238039	0.240747	-0.463827	-1.26175	-2.6102	0.329744	-0.185045	-1.14615	-0.0954363	0.296134	-0.392483	-2.50641	0.561744	-1.2335	-0.356821	-0.279696	-0.492057	0.884087	-1.04598	0.205215	-0.112461	-1.79731	-3.4715	0.445479	0.591168	-2.35789	-0.792201	0.386132	0.386132	1.05548	0.997296
1053	XP_011255341.2 arylphorin subunit alpha [Camponotus floridanus]	NA	2.31155	0.133871	0.686217	-0.909293	-0.423384	-1.43999	-0.443811	0.0749309	1.78302	0.742124	-1.51099	3.30252	-1.99757	-1.84797	2.3285	-0.946921	0.486103	0.914213	2.92033	-0.433011	1.63761	-1.25559	-1.02793	-3.1837	-0.139446	-1.57289	0.244701	-4.12597	-0.886395	1.40492	0.825534	1.86189	2.40942	1.29775	-1.05713	1.45281	-0.155445	-1.05008	-1.58769	0.0791899	0.226652	-2.71306	1.2404	0.492494	0.492494	0.97371	0.995194
459	E2ACT5	EB domain-containing protein	-1.33847	0.598997	-1.94013	-1.50316	0.471304	2.19058	1.13131	0.72866	2.83502	0.134656	0.225093	0.558542	-0.256645	1.31217	1.61022	2.98352	-1.78014	-0.413	-0.457044	-0.0682117	1.44221	-3.68041	-0.0245594	0.605828	-2.53553	0.0116761	2.22742	-0.897243	-0.12541	-1.44625	-1.0047	-0.205678	-1.86828	0.751216	0.697855	-0.106737	1.39594	0.952576	-1.06049	-1.75579	-0.0982097	1.41659	-1.6214	0.44031	0.44031	0.995558	0.989502
312	XP_0112	NA	-0.0891798	-2.09758	1.10481	1.36574	-0.476406	-0.786804	-2.4491	-0.793226	-5.2668	1.51878	-0.187828	2.57688	-1.01408	1.6367	0.0621129	0.889652	-0.825029	-3.1795	-0.66786	-1.22083	-2.88226	-0.241503	-0.851547	0.523074	-0.523466	-1.43778	-4.2032	-1.30897	-0.207118	-1.6922	-1.16534	0.637661	-1.4049	0.179088	-0.772384	-1.08885	-1.03696	-0.73649	-1.30694	-3.19178	-0.357385	-1.95786	-0.145744	0.456622	0.456622	0.980517	0.985769
1169	XP_011268137.2 uncharacterized protein LOC105258535 isoform X1 [Camponotus floridanus]	NA	-1.54966	-1.17557	1.5341	-1.14411	4.46027	-0.414657	0.962335	1.03812	-1.60264	-0.722186	1.28811	-1.92655	-3.23637	0.8787	0.447227	-2.26374	0.393451	-0.648309	0.677857	-1.87889	-0.180281	-0.763995	-0.990356	0.271063	-2.48497	-0.876939	-0.915535	0.974964	-0.601343	-0.193988	1.76845	-1.21806	-1.26156	-0.506338	0.430444	-1.27411	-1.12349	0.223287	-2.66129	0.234912	-2.0586	-2.35449	-1.03014	0.436489	0.436489	0.993205	0.985711
1046	E2AA04	SERPIN domain-containing protein	3.3281	2.24549	4.42715	1.8183	0.80152	-1.11571	1.90036	-2.73028	2.02934	3.34649	6.1953	7.45769	4.56506	-2.3142	5.76501	-0.238854	-2.10246	1.78924	-0.558825	3.21065	1.74262	-0.648097	2.4659	3.16387	-0.114014	1.57684	-0.150735	2.7935	3.08775	1.28714	1.50594	-0.0832247	1.47389	-1.48654	2.01928	-0.101141	3.61971	0.373964	2.52401	-1.52834	0.85316	2.48799	1.78547	0.631653	0.631653	0.91374	0.977221
708	E2AP51	DJ-1_PfpI domain-containing protein	-2.29164	1.34036	-1.11759	-1.47604	1.18102	0.257551	1.53197	0.11328	0.155044	-0.415477	-1.42325	3.73386	-1.92723	-1.04108	-0.923948	0.244886	-1.02809	-1.53974	0.24069	0.400654	0.302867	-1.37406	-0.159491	-0.82026	-0.436586	0.142108	0.464707	3.00441	0.224637	-0.212571	0.000460451	-0.84087	1.35402	0.121881	-2.5404	1.29153	-0.205217	0.624265	2.6008	-0.614981	2.47962	-3.4027	0.949427	-0.435973	0.435973	-0.979645	-0.975076
610	E2AJ86	N-acetylneuraminate lyase	0.435489	-0.135734	0.0932965	-2.49478	-0.283867	1.87133	2.63003	-0.380722	0.405389	-0.716239	-1.76963	2.01171	0.804913	0.646516	0.0993246	-0.0345886	1.56057	-2.35001	-0.746273	-0.459666	0.867074	-0.629182	0.893577	2.411	1.65441	-1.94726	3.25572	2.07221	-3.28594	0.0346607	-0.180097	-0.322658	-0.562306	2.30862	-0.223255	0.508299	-1.67871	0.0514114	4.68124	0.564272	0.219381	0.205913	1.50666	-0.462874	0.462874	-0.961536	-0.973357
419	XP_0	NA	-1.38246	0.0231168	-2.07392	0.275362	-0.079727	-0.316519	0.534033	0.258284	-0.313354	-1.13531	0.18652	-0.636215	-0.900439	1.87255	1.08173	3.08252	0.868664	-1.66412	-1.42188	0.94809	1.04603	-1.3307	-1.06199	-0.538471	0.981281	0.717943	0.166627	-2.07685	-0.339745	-0.00500805	-2.7258	-0.953465	0.780314	-0.948567	-1.06559	-0.536206	2.0959	-0.75275	-2.88264	-0.369132	-1.09267	-2.09867	1.81295	0.398495	0.398495	1.00648	0.972927
599	E2AIZ6	ML domain-containing protein	8.99153	7.30123	7.66377	7.60529	7.6926	3.81108	6.26527	-0.114536	5.11302	4.35431	5.33092	6.73616	10.1426	-2.15263	2.68894	6.44787	1.02935	8.035	3.54912	7.20303	8.73098	1.39647	7.21891	7.83603	3.31779	5.6177	6.62753	8.03281	4.23438	1.92102	7.9437	6.06505	5.82193	0.346425	7.88279	6.86212	9.26748	6.16241	7.10109	5.19519	6.70628	10.0582	7.06376	-0.766646	0.766646	-0.891427	-0.972362
319	E2A720	Stromal cell-derived factor 2	0.625157	-2.38782	-0.331827	-1.67721	-1.15576	0.811942	-0.600295	0.203801	-0.361278	2.40891	-0.779166	0.213926	1.56008	-1.65594	-0.950033	0.785779	-0.946555	-0.558584	0.652604	-0.70081	-1.2066	-2.29016	1.07047	0.948769	-0.482285	-0.0394361	0.0773379	-2.88305	-2.00094	-0.23796	-0.439096	0.431674	0.497291	0.446406	-1.03284	-1.64842	-1.24724	-0.538894	-3.08362	0.376253	-0.591745	-2.0585	-0.258753	0.372194	0.372194	1.03093	0.970137
127	E1ZXZ8	Aldedh domain-containing protein	0.877025	-0.165208	1.73605	-0.154723	-1.15582	0.227141	0.121004	1.51699	-1.75574	2.11846	0.281572	3.14702	-1.86696	-1.29325	1.20468	-0.925727	-3.58099	-2.75404	-0.0477774	0.45444	-0.569181	-2.26687	-1.51959	1.46175	2.09714	-1.28026	-3.13087	3.44155	1.21575	0.340456	0.806549	-0.412139	0.0852244	-1.00741	-0.579392	0.690394	-3.86954	0.341612	2.69867	0.375354	0.197629	0.398788	0.292472	-0.485208	0.485208	-0.946835	-0.970066
1321	XP_025268998.1 collagen alpha-1(IV) chain [Camponotus floridanus]	NA	0.678569	-0.960666	-0.237038	-4.56472	1.3523	1.00867	-0.506645	-0.0957605	0.667043	-1.92404	-2.91356	0.382431	-2.39177	1.10089	-4.58912	2.06784	0.128717	-0.834933	-1.08986	-2.80209	0.211116	0.486035	-2.01995	-2.28118	-0.771816	-3.84928	0.0218109	0.214245	-2.3983	0.277911	-1.43483	-1.93561	-0.0321972	0.724702	-1.03034	1.17941	-1.022	-1.73291	-5.00922	0.274392	-2.12451	-4.04656	0.231503	0.504779	0.504779	0.937957	0.969263
700	E2ANE4	FAD-binding PCMH-type domain-containing protein	-0.728622	-0.131274	-0.759303	1.90975	-0.742062	0.79061	0.137592	1.73437	-0.0413602	0.299777	-3.40665	-1.91435	-2.41985	2.86514	-2.84049	0.0068487	1.30884	-2.94821	-0.662049	-1.00355	1.95495	2.68045	-0.51667	-1.33324	1.34113	-1.76493	0.120867	1.53877	0.516741	1.66507	1.02659	-1.1239	0.0582162	2.0915	1.17003	1.62734	-2.70245	0.387213	1.22692	1.26211	0.774369	-1.20366	-1.24037	-0.464356	0.464356	-0.952575	-0.966712
240	E2A3I0	14_3_3 domain-containing protein	3.82663	2.31043	0.355227	3.20806	-1.10121	-1.20339	0.45874	-0.716351	0.698889	-1.9622	-0.509149	3.20285	2.50562	-0.422248	0.448274	0.168351	-0.294971	-2.71646	-0.411948	-0.921674	-0.146543	0.156117	1.62425	2.28107	0.621278	-0.531213	-2.64211	2.29948	1.77449	0.756199	0.447631	-1.89139	-0.791001	-0.482099	1.79284	-1.1316	2.69523	1.08368	3.28753	0.537184	1.60989	3.54504	1.91411	-0.486756	0.486756	-0.938805	-0.963877
1147	E2AY50	Tumor suppressor candidate 3	0.401297	0.476582	-1.13428	0.918047	2.4469	1.28691	-0.506053	0.978319	2.37296	-1.51368	-0.997338	0.479413	0.420281	1.58078	-1.86428	-0.944009	2.23679	-1.88827	-1.93871	-0.00599252	0.600759	-0.900047	-1.54326	-0.0546902	0.552459	0.103156	-0.965617	1.51314	-0.2067	-1.42835	-1.13925	2.24329	-0.646108	-0.0126709	0.88806	-0.977725	-2.71325	-0.952167	-3.57947	0	0.60775	1.23444	-2.05138	0.421129	0.421129	0.97501	0.9637
99	E1ZWT8	Laccase-4	1.11339	1.3989	-0.545624	0.356894	-1.83989	-0.273869	2.3732	-1.68434	0.055854	-2.70033	-1.73417	-0.741129	1.38046	0.0642521	1.23471	0.579363	1.15122	0.118971	-1.05132	-0.101637	2.01796	-0.0815716	0.348767	0.603395	1.29762	0.3807	0.776196	-4.40497	-0.82394	-1.51635	-0.280666	-0.402354	-0.890064	0.788238	-1.63934	-0.0637189	0.978613	0.68694	-3.21127	-0.616664	-0.721773	1.51053	0.501302	0.414991	0.414991	0.978115	0.962589
667	E2ALS8	Aminopeptidase N	7.53705	4.9034	2.60797	3.43301	6.95223	-0.750375	3.8548	-2.95175	1.41871	-0.685227	3.18232	6.35813	8.42722	-1.71077	-2.62053	2.47344	-2.05602	5.75227	-1.01269	4.36184	5.4019	-1.51278	6.59239	5.17792	-0.114639	-1.51293	-2.19911	7.57519	1.52066	-0.169936	6.33153	2.91076	3.5187	2.34476	6.53557	6.3264	7.4018	2.92116	8.1415	2.24605	2.1142	6.42713	2.71467	-0.903765	0.903765	-0.871173	-0.961384
851	E2AVY5	Transmembrane protein 184B	1.4492	-2.95683	0.667581	-2.7334	-2.16298	0.222193	-2.40756	1.1999	0.271478	-1.85728	-1.64335	0.500948	0.606286	-0.498347	-0.684262	0.409149	-1.0104	0.634973	1.46685	-0.719799	-2.88042	0.632512	0.594784	-0.834987	-1.70647	1.30764	0.0251769	-1.33597	-0.281032	0.742975	-1.42099	-0.0523159	0.464455	-0.133612	-0.656348	1.01595	-0.428797	-0.206122	0.475957	0.882608	0.444846	0.244551	-0.548886	-0.373792	0.373792	-1.01508	-0.961024
736	E2AQE6	Discoidin domain-containing receptor 2	3.45075	3.67453	3.3945	-0.477386	0.82544	2.81248	3.01398	4.33716	3.95712	4.9361	2.58774	-2.91078	-2.39686	5.20075	4.1672	3.66879	2.2321	3.72345	0.105221	4.59224	4.05228	0.844392	4.54687	3.19903	0.206404	1.89769	-1.64862	1.06639	3.14996	3.44217	-2.94872	3.67437	3.777	3.6691	3.13147	-0.900939	3.34249	0.688395	-0.753451	4.27906	3.41987	2.97074	4.56279	0.612134	0.612134	0.899938	0.960735
789	E2ASN8	Uroporphyrinogen decarboxylase	-0.303477	-2.89662	1.20919	-1.64982	-0.18038	0.376021	0.259715	1.56255	0.842149	0.559229	-0.945552	4.91031	-1.1724	-0.258294	-0.261539	-0.275134	0.593361	1.15075	-0.12867	-0.637667	-1.74114	1.70689	-1.09426	-0.49662	-1.47046	-0.638224	-1.72882	2.16067	0.300148	-0.518058	-1.98932	0.993936	-1.85304	-2.70054	-0.519307	-1.29892	0.0757321	-1.16968	1.49925	-1.41085	0.714698	1.26384	1.57861	0.43101	0.43101	0.961335	0.958466
1100	XP_011261898.2 alpha-glucosidase [Camponotus floridanus]	NA	1.75349	-1.17865	4.20905	0.307478	5.19618	1.26547	5.31265	-0.581159	5.45376	-0.240778	0.728716	4.05811	1.2065	-1.39122	-0.962291	-1.58227	1.2103	-1.59476	5.3537	-0.709831	0.427903	-1.03871	-0.92695	0.399232	0.395814	0.285552	1.06145	8.44191	-0.138906	-1.82541	1.79969	-2.4841	0.610459	-0.239071	2.02953	-1.20216	6.1148	4.74396	8.90127	3.42888	0.0175632	4.41261	1.31954	-0.761167	0.761167	-0.878188	-0.958466
1348	E2AY69	Heat shock 70 kDa protein cognate 3	4.04864	2.18053	-2.61137	2.46951	-1.2039	-0.919215	-2.42334	-0.641055	-2.63332	-2.55387	-2.79845	0.634766	1.39236	-1.46901	-0.554449	-0.576581	-0.903624	0.889709	-1.88634	0.351814	2.32336	-3.02039	-2.73803	-0.409887	-1.78298	-0.949362	1.64731	3.55971	-5.54908	0.499788	0.0477406	-0.168651	-0.237918	-0.798295	-0.498485	-0.658092	0	2.24815	2.00798	-0.57462	-0.912191	2.99542	-0.447264	-0.550627	0.550627	-0.909022	-0.956488
317	E2A701	Amidohydro-rel domain-containing protein	0.43398	-0.700355	-0.4498	-2.05376	1.39411	0.582493	4.64805	1.32383	2.34582	-0.691225	-1.25906	-1.81394	-1.54918	0.760376	0.296695	0.312219	-3.06972	0.290038	-0.871097	-0.0924167	0.0868594	-1.06583	0.30476	0.262506	0.485522	0.0958789	-0.785506	-0.400249	0.398189	0.424537	2.01952	-1.94317	-0.866668	0.441819	-0.37391	-1.32521	-2.11413	0.456532	-3.5704	-2.85767	-0.536668	0.0972275	0.687693	0.433809	0.433809	0.95604	0.955751
222	E2A252	Elongation factor 1-alpha	5.51307	7.69369	7.69219	4.98317	3.16609	5.87503	4.12833	6.99902	2.17721	6.96686	2.89572	7.63457	4.88969	-0.169085	6.8784	3.96077	6.30861	7.64842	2.62074	3.76313	7.12158	2.03091	3.47704	4.47358	6.09193	6.78515	6.184	4.36318	4.4506	1.45987	6.50105	1.0091	8.06611	-1.4781	1.56794	7.36683	4.21601	3.78662	4.23474	7.14289	2.8361	4.64915	2.95764	0.634396	0.634396	0.8891	0.954077
425	E2ABL0	GRAM domain-containing protein	-0.060134	-0.239115	-1.44357	-1.76614	1.40644	-0.0208666	-1.01857	0.575829	-0.219442	-0.124088	-0.877726	0.141929	1.07818	-0.954674	-0.530755	0.273833	1.95038	0.0975369	0.3509	0.867982	-1.45033	-0.0973169	1.58772	0.617229	1.96747	-2.0858	-1.51102	0.170457	-0.375544	-0.326153	-0.200175	-0.120448	-1.43787	-2.3275	-1.84854	0.071558	1.20946	-0.15265	1.0123	-0.742583	1.02427	-3.5349	0.848703	0.366566	0.366566	1.01096	0.952622
963	E2B1I8	UBA_e1_C domain-containing protein	0.255182	-2.0533	-1.84132	-0.655451	0.570399	-0.148379	-3.47616	-1.20598	-0.000936697	0.0841948	0.475318	-0.361292	-1.20117	-0.582826	-2.00935	-0.687885	1.00968	-0.392296	1.26518	2.83645	0.938332	-2.45687	-1.2339	0.884925	-1.4755	1.15708	0.67485	-2.82687	0	0.170393	2.07361	-0.695747	0.560823	-0.116119	-0.941119	0.505186	1.36341	0.307255	-2.91602	-0.230803	-0.558257	1.01115	-0.409867	-0.399631	0.399631	-0.974937	-0.951156
1101	XP_011261960.2 solute ca	NA	4.34384	3.33052	1.56575	-0.679921	0.387183	-0.986787	0.458382	0.876349	1.26593	-0.23139	0.624851	1.68387	4.35869	-0.686437	-2.75388	0.496249	1.27396	0.198363	0.0796471	2.68742	1.74571	0.405496	1.13843	1.81303	0.226728	-0.202273	0.76505	2.41646	-0.336768	-0.205568	2.51066	-1.32615	-1.30742	-0.660789	0.653084	0.838274	1.23394	-0.519348	-3.30575	-0.692018	1.77639	3.69041	2.02579	0.468672	0.468672	0.930508	0.950292
348	E2A8R8	Fructose-bisphosphate aldolase	3.45287	1.39144	-1.07508	2.34069	1.85212	0.579926	0.210919	0.521348	-1.54862	-2.0395	0.265808	5.05158	1.37866	1.29643	3.3489	-1.03343	-1.69961	0.425415	-0.785879	0.874456	0.737117	-2.53836	-1.78036	1.94783	2.06249	-0.367219	1.4861	2.76019	2.34977	1.03833	1.62072	3.98005	-1.66926	-0.10332	-2.79329	-0.438615	-0.000140868	0.386541	3.96876	0.0226477	0.05971	2.77212	0.972335	-0.514664	0.514664	-0.910929	-0.948769
1232	E2ADW6	Carboxylesterase UNQ440/PRO873-like protein	-1.93743	0.0217633	0.639381	-0.00130275	1.25611	0.129755	1.2476	-0.54292	-0.238204	-0.658337	-1.58539	0.0809086	0.25066	0.896619	0.767057	0.247925	0.375268	1.01733	0.616524	-0.758741	0.954734	-0.701527	-2.36793	0.144	-0.0948335	1.17332	-0.527777	-4.42499	-0.498427	-0.241324	-0.32129	0.60385	0.607564	-2.07984	-0.115925	1.13904	-1.70455	-0.494906	0.459014	0.198227	0.0858816	-0.204053	-0.955331	0.350002	0.350002	1.02589	0.947928
161	E1ZZW3	Putative EGF-like domain-containing protein FLJ14712	0.0369784	-1.35358	-1.86079	-0.296081	-1.80425	-5.0966	-1.45822	-4.29201	-0.920468	-2.33603	-0.663802	3.30482	3.62742	-0.100638	0.849766	-3.87329	-6.49247	-5.61612	-1.64422	-0.841137	-6.3562	-1.48064	-3.63272	0.668532	-3.90927	-4.52918	-2.66454	-2.58199	-0.689624	-0.588994	-0.437276	-1.84528	-3.77283	-2.84045	0.942378	-0.775924	-0.244343	-0.873475	0.395463	1.38111	-1.53797	0.885959	-1.47132	-0.614691	0.614691	-0.881541	-0.943672
1016	E2A418	FMN hydroxy acid dehydrogenase domain-containing protein	-2.81048	-0.0221009	0.922766	0.722201	-0.294778	0.541122	0.52061	3.72292	2.00829	0.741304	0.104559	-2.92084	-3.45939	-1.84208	0.176838	0.269579	0.721924	-0.0749345	1.26013	-0.0038639	3.04966	2.2738	0.0415751	0.859152	-1.00173	-0.776864	0.467358	-0.0119068	-0.115859	-1.70525	-0.387587	2.01539	1.74268	-0.0734776	-0.699082	0.17657	0.745557	-0.927534	-1.73882	-1.14021	-1.26745	-1.7933	1.8445	0.434994	0.434994	0.939235	0.943153
659	E2ALJ9	AAA domain-containing protein	-0.408232	0.0573999	-0.00507511	-2.81604	-0.94356	0.299533	1.33468	0.869753	-0.31728	1.43835	-1.71742	-1.47311	-1.89299	1.00527	-0.43604	-2.41051	-1.18772	1.41224	-0.588735	0.55226	0.0910623	-0.779682	0.227256	-0.472337	1.31341	-2.41439	-2.31133	-2.02457	-0.784172	-1.31557	-0.104227	1.18089	1.97555	0.644533	-0.0295012	-0.0321362	0.339689	0.0944622	-4.3798	-2.22016	-2.27242	-1.98927	-0.0235287	0.406956	0.406956	0.95699	0.942328
671	E2ALV6	AAA domain-containing protein	-1.74558	0.0383067	2.25717	-1.4636	-1.37381	1.75386	-0.390097	-0.569335	-0.0385215	0.302294	-0.363896	-1.24976	-1.4737	1.61265	1.35049	0.362504	0.483621	-1.02098	-2.07561	1.27653	-0.756549	2.54666	0.243169	-0.707173	0.756375	-1.32031	0.753758	-2.69419	-1.45405	1.24822	1.06544	0.818797	-0.174862	1.22527	-1.63438	-0.86232	-0.221695	0.108705	-2.57391	0.967309	0.41191	-4.8492	0.436252	0.422213	0.422213	0.946123	0.942301
326	E2A7K9	CHK domain-containing protein	-1.18085	0.0702149	0.0336674	0.79805	0.063807	-1.96798	-0.805029	-0.0316431	0.469046	0.0358102	-1.34043	-2.59511	-2.77981	-1.06774	-1.9544	-1.04691	-1.2963	-2.10755	1.01515	-0.570679	-0.590337	0.00536079	-1.42646	1.10379	2.0514	0.82463	-1.5364	-0.955795	1.57609	-1.65908	-1.50902	2.79783	0.0608269	0.0300913	1.20395	-0.377545	-0.954515	-2.27698	-2.88037	-1.57345	0.171575	-1.45659	-2.68948	-0.3919	0.3919	-0.955526	-0.932357
1091	E2ALY1	Uncharacterized protein C6orf168	-0.0931555	2.75741	-1.20361	-1.5061	-0.329129	0.0412155	-0.931873	-0.409165	-0.820102	-2.78344	1.32452	2.49315	2.24573	-0.801058	1.71199	-0.796382	0.233315	-2.25176	1.27	1.76215	-2.47813	1.2776	0.80804	1.41864	-0.271134	-1.08573	-2.74829	-0.824758	0.659901	0.525076	-3.17235	1.14186	0.0973729	1.07324	-1.88642	-2.03322	-0.161393	0.78035	-3.20565	1.44697	0.401185	1.17833	-0.861453	0.442514	0.442514	0.921341	0.932237
74	E1ZVE3	Alpha-carbonic anhydrase domain-containing protein	-0.87214	1.96217	-0.980459	2.10903	-1.08899	-1.55404	0.214194	-1.63866	0.715809	0.232564	0.155343	-0.563056	-0.158051	1.80782	0.0181562	0.361852	1.20885	-0.069643	0.904473	2.65273	0.249626	-0.649596	-1.92568	-1.1283	0.027368	-0.938802	1.93608	1.74147	-0.689562	-1.34857	-0.132248	-1.27168	-1.91318	0.0242304	-1.59319	-2.49039	0.368909	-0.641643	1.95668	0.661903	1.19872	-0.224424	-0.268085	0.370684	0.370684	0.968089	0.927118
829	E2AUV2	Glutathione transferase omega-1	-1.1964	-1.76719	0.104315	-1.73795	-0.534736	0.988988	-0.762977	1.98811	-1.86894	0.470326	-1.6929	2.34742	0.684452	0.079114	1.32903	-3.8961	1.31109	-1.06106	-0.774447	-0.305615	-0.240587	-1.55374	-0.0772311	-0.524565	-0.300506	0.84938	0.835068	-0.0152865	-0.622234	-0.178592	0.657193	-1.19964	-0.0327461	-2.30836	0.704476	0.301122	-0.25571	0.42541	0.821444	0.525863	0.738999	0.238366	-0.608626	-0.357641	0.357641	-0.982023	-0.926605
664	E2ALM0	Coproporphyrinogen III oxidase	0.318171	0.490918	-0.707932	1.85246	-0.573901	-0.285624	-1.24423	1.32009	0.356593	-0.519247	-1.74022	0.391384	-1.24762	-0.67619	0.478997	-0.898301	0.926003	-1.45697	0.622315	0.368676	-2.52246	3.58941	-0.165438	-1.2923	0.586507	-0.858925	-0.969307	-0.184108	0.352022	-0.0165377	-0.816617	-0.896354	-1.50509	-0.420737	-2.12988	0.685337	0.323901	0.556038	-2.3864	0.20099	1.50875	-0.815567	-0.12021	0.352398	0.352398	0.987821	0.926106
1350	XP_025269811.1	NA	-0.511941	-0.275669	0.852621	-2.16515	0.317117	-0.544752	-1.08771	-1.11096	0.301322	1.93143	-1.55093	-0.467189	-0.696266	1.99804	-1.25997	0.357057	1.48975	-2.14053	-0.342989	-1.45976	-0.0857335	-1.30277	-3.82283	-1.60794	1.13656	0.285409	-2.37591	-1.31359	-0.413888	-1.10594	-0.852609	0.555795	0.308326	0.242875	-0.828334	-1.89708	-1.36682	-1.00774	-6.8145	0.990163	-2.70778	-0.482398	0.485449	0.435115	0.435115	0.913865	0.923029
1338	XP_025269284.1 lysosomal aspartic protease-like [Camponotus floridanus]	NA	0.317535	0.427279	1.10824	0.0603314	-1.83229	0.690041	-0.688459	1.38047	-2.97901	-0.698742	0.238273	-0.138835	-0.222758	0.75723	-0.0270795	-0.684916	-0.950606	-0.52146	-0.132953	-0.627505	-1.02722	-0.610831	0.0974363	0.579242	0.748371	2.20675	-0.27208	-2.25642	0.719695	-2.9432	0.113998	-1.50208	-0.590527	-0.958328	0.273288	0.0936475	-3.44548	-0.496951	-3.53695	0.980885	-0.606023	-1.08154	-0.624916	0.366199	0.366199	0.966255	0.922627
719	E2APJ5	Sidoreflexin	-0.166383	-0.225619	-0.12056	-2.87809	2.9307	1.08176	-2.43121	2.03171	-0.879302	2.62109	-1.24142	-2.73511	-2.37903	-0.0485679	-1.02407	0.741504	-0.959137	-1.5552	-1.07598	1.17881	0.191111	-0.78024	-0.413733	0.210528	-0.064039	-2.39814	-1.73342	-2.22565	-0.267945	-1.12991	-0.905356	-1.35214	-0.614325	-0.863511	-0.0426883	-0.620611	1.51678	-0.703196	-0.970347	-0.593401	0.573739	-0.831105	-1.76436	0.385174	0.385174	0.947454	0.922359
287	E2A6J0	40S ribosomal protein S19a	0.435584	-0.927918	0.389008	0.309958	0.44892	-0.0101941	2.14588	0.337968	-1.05137	-0.623808	-1.71014	-1.34327	0.704992	0.882891	0.159602	-0.0928934	-0.181524	-0.700414	0.0642895	0.0320671	-2.47982	-0.533976	0.333389	-1.65709	-0.409578	-0.0619255	-2.00586	0.557816	-1.08932	0.850575	-0.250664	-0.125216	-0.442377	1.10981	1.09479	0.0720409	-1.05374	-0.771577	-0.0210583	-2.17201	1.03598	-1.64448	-2.4699	0.324394	0.324394	1.02389	0.921751
247	E2A3P2	Syntenin-1	0.311382	0.0243001	-0.380497	-1.18387	-1.51048	-2.36997	-0.470735	0.467238	0.753012	0.85576	-0.553065	-2.55218	-0.187253	1.04227	1.69343	0.309271	0.198088	-0.0246247	1.33419	-2.45513	-1.79719	-0.463342	2.07768	1.69325	0.148056	-1.64403	0.830422	-1.87654	0.0389906	-0.407624	-3.03777	0.506393	-0.611367	-1.4465	-1.88039	-1.18974	-2.20765	-1.23916	4.54475	-1.96366	-1.18226	-2.537	0.712049	0.425241	0.425241	0.91485	0.919382
1351	XP_025269797.1 serpin B6 isoform X2 [Camponotus floridanus]	NA	1.80058	1.54236	0.739141	2.5757	1.86808	0.827923	-0.233189	-3.74521	0.0810795	0.920299	3.36832	2.28578	3.36706	-0.850755	3.43833	-2.19265	-3.16654	-0.757677	0.169322	-2.00267	1.57421	-0.918039	-1.00368	-1.05328	0.709786	-3.61862	1.29875	0.465999	1.38529	-0.674039	1.64619	-3.9701	0.60685	-1.26943	3.08114	1.72765	2.48132	-3.79226	0.385671	-0.0441502	0.684107	0.690102	-3.32269	0.550294	0.550294	0.867935	0.918799
477	E2ADG5	Peptidyl-prolyl cis-trans isomerase	4.10814	2.2205	1.57636	0.928644	1.81065	-0.0306124	-1.21288	-0.695443	-0.0928181	-1.54187	0.433909	0.0788418	2.2687	0.784836	0.22157	-0.0125656	1.61687	0.116744	-1.42529	-1.50594	3.27218	1.01396	1.13914	1.15779	0.0513186	-0.404415	0.921666	0.450259	-0.386321	-0.819599	-0.39209	0.791948	2.94322	-0.623399	-0.328848	1.50673	-2.67466	1.01946	0.54172	-0.0138013	-1.14488	2.4426	0.162652	0.395307	0.395307	0.932092	0.917207
759	E2ARH0	40S ribosomal protein S26	4.27305	2.46198	2.45538	2.71608	1.63238	-2.04689	2.02212	1.07282	0.0933724	0.401199	0.754802	-0.563168	4.22039	-0.551884	0.726171	3.13959	1.14045	0.854762	-0.258462	2.64853	2.26001	-1.26822	2.601	2.33757	0.934399	-0.671013	0.355435	1.4309	2.01652	3.92469	0.953805	1.89765	3.9179	0.587637	1.60575	-1.04294	3.02046	1.08622	0.963998	0.074077	3.0039	3.25288	6.42062	-0.465023	0.465023	-0.888737	-0.913955
1064	E2AE47	FAD-binding FR-type domain-containing protein	0.868225	1.31286	1.76249	0.544614	-0.435163	-0.533168	-0.823354	-0.0996047	-1.59979	-0.933611	0.751745	-0.329789	-0.116296	0.563638	-0.491432	-2.14281	1.29296	1.50489	-0.483483	-2.32279	0.231828	-0.0472934	1.22043	-0.615661	-0.140653	-0.77522	3.13597	3.34499	1.04732	0.63887	0.36508	-0.690494	0.353831	-0.252251	0.317345	-0.818686	-0.771848	0.25171	1.56328	1.31174	1.02313	0.233603	-2.56018	-0.361351	0.361351	-0.956701	-0.912604
130	E1ZY32	Uncharacterized protein	4.89457	2.44999	3.84744	4.61056	1.23503	-0.175431	3.72731	0.335885	2.23143	1.90648	6.0198	7.76779	5.87144	1.21003	3.00461	5.73059	0.693536	5.49494	3.29953	4.64163	3.60379	4.9607	5.97432	5.23308	0.364084	4.34527	2.63275	5.28912	6.01114	1.96907	6.76768	4.38189	1.54388	5.01095	5.96391	3.7543	6.18106	5.76093	7.45254	-0.0661518	0.111992	6.23941	5.09195	-0.57864	0.57864	-0.854387	-0.911661
616	E2AJM5	Prolyl endopeptidase	-2.15385	0.596464	-2.07969	-2.27777	1.10464	-1.69322	1.35805	1.04847	-0.32106	0.431532	1.19473	-2.23983	-1.4212	-0.487349	-0.0865468	-0.570692	-1.17684	0.517049	-1.69861	-0.584003	-1.72313	0.907334	-0.749709	0.466349	1.0064	0.13568	0.0531853	-5.97065	-2.07088	0.512726	0.216948	0.142925	-3.27053	-0.212304	-1.37678	0.445966	0.981957	-0.324813	-5.94251	-0.261297	-1.6595	-1.77744	-0.630083	0.450417	0.450417	0.892289	0.911638
562	E2AH26	Chitin-binding type-2 domain-containing protein	-2.31624	1.80611	0.714219	0.297382	1.43694	-2.15444	-0.334632	0.0371969	-1.44007	1.04492	0.0764637	1.45117	-1.97227	1.20267	-1.34337	-2.02584	-0.158913	-0.33282	-0.8282	-1.42226	0.167715	-2.10686	0.685526	0.361498	-0.352254	0.872176	-0.725549	-0.35026	-0.342878	0.856123	-0.256437	-0.0830365	-0.662104	-0.748304	0.996683	0.32414	-2.52725	-0.993826	-3.1566	-2.3688	-0.209048	-3.35662	-1.27217	0.372961	0.372961	0.942612	0.911022
126	E1ZXZ6	Uncharacterized protein	-1.48023	-3.27593	-2.13403	-3.27954	-0.915867	-1.2943	1.38094	-1.32605	-0.391199	0.300131	-0.00730577	2.63754	-1.62238	1.70073	-0.994842	-0.0613481	-2.01165	0.375163	-1.78599	0.282105	1.24917	-0.936567	-1.47966	-0.208315	-0.541234	-0.216844	-0.266907	-1.92122	-2.02127	0.281831	1.07244	0.901381	-0.0675873	0.841674	1.92808	3.3966	-0.163041	-1.56747	-3.30614	-0.67597	0.0624419	-2.72788	0.603638	-0.425476	0.425476	-0.9038	-0.91072
1102	XP_011261970.1 10 kDa heat shock protein, mitochondrial isoform X1 [Camponotus floridanus]	NA	4.14614	0.573383	0.795385	1.9442	0.890934	-0.16219	0.185796	-0.573184	-0.907121	1.34062	1.26622	-1.20931	3.30219	-1.81612	-0.20061	-1.0772	0.30907	0.39886	-0.714307	-1.02465	1.03738	0.936445	0.896096	1.8133	-0.837123	-0.251718	-0.168966	3.97665	1.877	0.579551	3.31386	-0.956789	-0.970113	-0.927572	-0.432033	1.07055	3.54492	-1.08658	1.75844	1.28501	-0.0129998	2.71811	1.1191	-0.421151	0.421151	-0.905477	-0.910085
146	E1ZZ14	RRM domain-containing protein	0.487394	-2.65002	-0.00454505	-1.87879	-0.82059	-0.412392	-0.913198	2.88871	-0.373835	2.86915	-1.76858	-1.44847	1.57667	2.62081	2.37342	1.33143	0.856251	1.44078	-0.102566	0.917334	-3.05581	-1.12679	0.927465	2.16747	0.232043	-0.985921	-2.07358	-0.626882	4.45452	-0.248779	-3.82747	-1.36958	-1.16221	0.207602	-0.313394	1.64417	-1.16007	-2.35417	-4.50566	0.666781	2.49288	2.04495	-2.36288	0.516349	0.516349	0.860737	0.904461
566	E2AHA9	Aldedh domain-containing protein	0.19001	-0.939688	-0.0153492	-0.492355	-0.0180993	1.03856	-1.10276	-1.04686	-1.6815	-0.0104154	-0.726016	-0.0932052	0.819641	0.441626	2.4074	0.803796	-3.00164	0.91238	0.342346	-0.816285	-0.875639	-1.46596	0.920394	0.46011	0.538273	-0.445726	0.412211	-0.176783	0.943671	-0.413588	-0.713602	-0.304523	-1.49715	0.121866	0.195687	-1.5277	0.197918	0.866649	3.39806	-0.867284	1.59818	0.535636	-0.456784	-0.334979	0.334979	-0.97578	-0.903498
427	E2ABM0	MFS domain-containing protein	-1.28616	0.323512	0.127983	0.83391	0.433565	2.70028	1.14196	-0.649722	-1.35844	0.938981	-2.25275	-2.45112	-1.45568	-0.782838	1.67445	0.764994	-0.244815	-0.820094	0.92213	1.98722	-1.5438	0.222793	-0.144452	-1.76796	0.412918	-1.99106	-1.8744	0.523192	-0.762844	-2.01444	-1.0997	-0.126523	0.671546	0.105973	-0.374254	-0.585757	-0.670427	-2.00988	1.79872	0.750655	-2.37119	1.75697	1.29766	0.376622	0.376622	0.925546	0.901253
738	XP_019884221.1 heterogeneous nuclear ribonucleoprotein R isoform X10 [	NA	1.21528	-0.442268	-1.75566	-0.941879	-2.909	2.479	0.201336	2.68956	1.42796	-0.0300245	0.835909	-0.0674706	2.1031	-0.562202	2.17166	0.215296	1.73101	1.07132	-1.234	0.172405	2.17096	-2.26857	-1.59873	0.343793	-0.687026	1.75214	-0.130837	-2.26848	0.798875	0.165258	0	0.699767	-0.152187	-0.864069	-0.457722	0.884102	0.864756	-0.859308	-2.31639	-0.155637	1.29243	-1.40912	0.559756	0.387212	0.387212	0.916206	0.900797
1088	E2AKQ7	Ras-related protein Rab-2A	-1.16859	-2.17985	0.664332	-0.99055	0.0676281	2.21836	-2.70401	0.0186513	0.813024	0.452112	1.07332	0.381155	2.4388	1.3097	1.55695	0.327441	1.8946	0.654711	0.859033	-1.19895	-1.80657	0.8915	-1.18701	-0.785495	1.99428	0.909353	1.22963	-1.8226	0.654957	0.700242	-2.888	-2.22246	0.807226	0.00278669	-1.26807	0.815859	-1.38131	0.550563	-2.69436	0.689568	-0.823064	1.16077	0.346577	0.391864	0.391864	0.90839	0.897584
111	E1ZXE9	Innexin	0.605329	1.9243	-0.958102	0.178776	2.20513	0.85297	0.17599	-1.99178	-1.56118	2.06868	-0.216915	-1.00054	1.85685	0.3168	-1.85833	-0.0125724	-4.63615	1.74956	1.78752	0.927752	0.0777366	1.48813	0.105383	-2.61017	-0.852068	-0.408491	0.300356	-0.675888	1.49138	1.58969	-2.05081	0.278212	0.332989	1.35167	0.673269	-1.81386	-0.872394	-0.722946	-2.13798	1.99942	-0.462046	0.339966	-0.386902	0.409453	0.409453	0.895402	0.896661
967	E2B1T2	Rhodanese domain-containing protein	-0.582712	-2.14599	-1.23951	1.73861	-0.815822	-0.896939	1.78122	-1.06683	-0.575151	0.741089	2.04051	-2.18279	0.143583	-0.482726	-0.0315026	-0.845201	-0.698777	2.24809	0.587026	-0.154314	-1.89732	-2.12946	1.07583	-0.175463	0.0200747	-1.00268	-0.466605	-1.68396	-1.95348	-1.88265	-0.934815	-1.14936	-0.169357	0.597224	-0.699077	0.143381	-1.93408	-0.304494	0.473853	0.455022	1.45845	0.200918	-2.71943	0.352018	0.352018	0.940123	0.894508
731	E2AQ19	Dolichyl-diphosphooligosaccharide--protein glycosyltransferase subunit DAD1	0.557879	2.05624	-0.407533	-1.3897	0.313939	0.59836	-2.96527	-0.997987	-0.746922	-1.38316	0.982383	-4.15223	-4.03261	0.429884	-0.316844	-1.09425	0.102651	2.00547	2.16787	-0.654284	0.988287	-0.222883	-0.779757	-2.75942	0.702558	-4.17032	-0.515677	3.77328	-1.26539	1.461	1.42435	-0.369553	0.0259845	0.818602	-2.89116	0.281884	0.160285	-0.0855762	1.09301	0.809022	2.31806	1.41157	-0.678844	-0.4659	0.4659	-0.86505	-0.894038
831	E2AUZ7	Innexin	-0.337013	-1.49527	0.847218	-2.42287	0.622456	-0.533313	-0.838719	-0.309633	-0.949989	-2.09815	-0.163119	-1.88388	0.748602	1.20123	-2.45825	0.172804	-0.0570192	0.775454	-1.26115	0.521933	-0.369047	0.872007	1.52665	2.36671	-2.57446	-0.196154	1.21834	-0.66395	-1.59758	-2.12455	-0.193954	0.975453	-0.245404	-0.94355	0.189645	0.108819	-0.125549	-0.282184	-4.18995	-0.0367788	-1.44133	-2.30507	-2.29594	0.374869	0.374869	0.915069	0.892611
1078	E2AIC5	5-hydroxyisourate hydrolase	6.59091	5.98772	5.06997	3.35684	1.48947	0.438234	4.45521	-0.496403	-2.01254	5.85332	7.9946	9.15237	7.57874	1.13488	8.3543	4.42542	1.05102	5.50631	0.590512	5.69843	4.84613	0.271563	4.55606	6.2048	0.884741	5.90966	0.578035	6.20697	4.15769	0.628407	4.90723	0.43385	0.186043	-0.321249	6.88222	4.35067	6.48685	3.38409	4.80087	-1.21021	0.436395	6.85114	3.37713	0.738583	0.738583	0.815036	0.892299
271	E2A4R0	Heparanase	-0.476233	-1.58553	-0.094249	-1.3133	0.493219	0.653617	0.764788	-2.35616	-0.898637	0.902561	-1.90859	1.61264	2.39173	-1.81591	-1.58895	-1.17087	0.471689	2.97924	-0.376081	0.295241	-2.89668	0.717077	-0.838477	-0.0362528	0.502591	-0.345591	-0.114101	-3.16609	-1.16944	0.145485	-1.0759	-0.120398	-0.594632	0.761949	0.695585	-1.27587	-0.566571	0.245271	-3.76561	-0.0431113	-0.596455	-2.36899	0.00204743	0.381788	0.381788	0.907346	0.891115
601	E2AJ35	Phosphoglycerate kinase	1.13628	-1.201	0.264565	-0.904488	1.68819	-0.83321	1.42541	-0.402896	-2.48399	-0.574375	-3.81247	-2.33513	-2.13508	0.0359074	-0.934286	-2.73727	0.675884	-0.494147	-0.448507	-0.720627	-1.44543	0.0169767	-0.412275	-1.65584	-0.291716	1.27313	0.485083	-1.08361	-0.691743	0.24891	-3.16569	2.33108	-0.145179	-0.703708	0.790991	0.373487	-1.11717	0.641138	-1.08775	1.08773	-0.943977	-1.42617	-1.97103	-0.370527	0.370527	-0.915081	-0.889907
618	E2AJN5	T-complex protein 1 subunit alpha	-1.66956	0.535943	0	-0.931717	-0.619371	-0.506455	3.09711	0.663884	-0.686646	0.113578	0.688346	-2.79354	-1.51514	-1.42462	0.453724	-0.252969	-0.329677	-0.930396	-0.365242	-1.52521	-0.424949	-1.28621	0.236748	-0.397316	0.696456	-0.532898	1.63595	-1.89026	-1.79079	-0.111772	-0.749548	-0.706801	-1.05551	-1.32014	-1.01543	-1.45063	-0.256802	-0.725859	-4.26378	-0.222041	-0.0684756	-0.291866	-0.421137	0.33509	0.33509	0.948199	0.886302
872	E2AX09	FA_desaturase domain-containing protein	0.657337	-2.38002	0.0338772	0.314708	-0.106391	-1.14213	0.74107	0.326683	0.283007	1.2922	-0.886118	-0.540142	-2.09089	-0.167322	2.97236	-1.61227	-2.18928	0.583519	0.896881	-2.85479	-2.56176	-1.72625	-0.300131	-2.17598	1.99999	1.14395	-1.09885	-3.45915	0.883222	1.21496	1.80302	0.276056	-0.291374	0.3909	-0.460667	1.50545	0.345596	0.148786	-4.56725	1.20684	0.371331	-0.877937	0.969713	-0.421033	0.421033	-0.874807	-0.885524
451	E2ACG3	AMP_N domain-containing protein	0.622122	-0.0350553	0.0172731	-1.79701	1.57111	-1.75125	-0.196713	-1.33605	-0.1657	3.04374	0.253999	0.0604017	0.560091	-3.3103	-1.31332	-2.19581	-0.803457	-1.05554	-0.746411	1.48058	-1.24746	0.157666	-0.709735	-0.846244	1.2257	-1.80433	-0.898126	2.38752	-2.76656	0.849287	1.01543	-0.384527	-0.887713	0.706814	-0.147694	-0.0529386	0.967161	0.401529	1.64932	-2.46429	-1.64624	0.550305	2.11963	-0.38552	0.38552	-0.894072	-0.883344
1290	XP_025265925.1 cytochrome P450 4C1-like [Camponotus floridanus]	NA	0.0588888	1.67628	1.53961	-0.142116	-2.86236	1.50889	-1.61993	4.44443	0.346076	2.57728	1.62346	-0.0568632	-1.04485	5.77446	0.165769	0.23029	0.262311	-1.53339	0.261454	-0.89862	1.87975	0.499542	1.87505	0.189569	2.16817	2.65777	0.348355	-0.358484	4.3052	2.18329	0.719955	-2.14372	0.0693287	1.73363	5.2535	0.737473	4.00385	1.11364	-3.71894	0.291677	1.97533	0.887411	2.16639	-0.508935	0.508935	-0.83586	-0.88013
691	E2AMW3	Cathepsin L	4.80934	3.72254	-0.239259	-1.5068	-1.56561	0.24627	2.37952	0.231045	-1.26967	-0.127181	2.83947	6.57504	5.00095	0.116306	0.188386	5.28385	-2.48491	1.38763	-1.73424	3.67279	1.34369	3.49991	3.62167	2.82355	0.580871	1.17274	-0.379155	-0.504016	2.28739	1.16422	2.37715	1.4191	2.21799	-0.133836	2.02491	3.11442	1.69242	-1.06777	2.54741	-2.37144	0.264258	3.09895	-2.16607	0.556659	0.556659	0.820016	0.875217
544	E2AFZ6	Uncharacterized protein	-0.719054	-1.79398	0.366519	-3.02789	1.16331	1.26575	0.690553	-0.642985	-0.611348	2.42868	-1.74642	-0.371626	-1.28219	-1.35294	-0.623849	0.00439392	0.891077	1.47524	1.26435	0.163433	0.574678	-1.69405	0.430108	1.14113	-0.805832	2.67048	-0.0337184	-4.02722	-1.55967	0.603695	0.815117	-1.34167	0.627869	-2.3395	-0.783374	0.824842	-3.23919	0.376015	-2.45959	0.16576	1.74246	-0.148597	-3.19034	0.411186	0.411186	0.863638	0.872292
170	E2A062	Secretory carrier-associated membrane protein	-2.1088	-2.10452	-1.61095	1.22371	-0.307225	-0.167106	0.798834	-0.414375	0.0995089	-2.14382	-1.58562	-3.03373	-2.46339	-1.75304	-0.153114	1.67108	-1.97847	-0.702757	-0.135639	-0.410177	1.68483	-0.355723	1.73077	0.0778692	1.29355	-0.711836	-0.820988	0.110342	-2.00392	-0.0269429	-1.49656	-0.427594	-1.84622	0.384442	-1.88043	1.70611	-0.237053	-1.01865	4.56279	-0.652369	0.410685	-1.43199	-0.552603	-0.39018	0.39018	-0.875659	-0.871823
727	E2APY5	Laminin-like protein epi-1	-1.42535	-0.0259654	0.586913	-2.15721	-1.42821	-0.968546	-0.266679	-0.233238	-0.635058	0.499193	-0.774542	-2.08707	-0.571167	-1.6386	1.07548	-0.301666	0.445695	-0.0618349	-0.171786	-1.56082	-0.350038	1.7298	0.509751	-0.242676	1.07571	-0.8634	2.23002	-0.65548	0.553296	0.596869	-0.358668	-0.313482	-1.72109	-0.943034	0.0787479	-1.06276	0.810411	1.07369	-3.88612	1.87445	0.0287843	0.255013	-0.447959	-0.330679	0.330679	-0.928707	-0.87016
342	E2A8B3	Dolichyl-diphosphooligosaccharide--protein glycosyltransferase subunit 1	4.18083	3.57367	-0.370408	2.58568	-2.19027	2.35241	0.328905	-0.16936	0.772194	-0.549099	0.292836	1.0646	3.88279	-0.13139	0.131766	-2.80238	-3.74621	1.90025	-0.881152	2.99062	3.11395	-3.16465	1.71318	1.60289	-0.811519	-0.770549	-0.875574	3.22669	2.11476	0.311369	1.38638	-2.10911	0.63289	-2.85003	-0.0647394	-0.527982	1.55929	-0.898864	0.393045	0.293646	-1.86088	3.65781	-1.68528	0.510691	0.510691	0.818981	0.865114
1222	XP_025262246.1 uncharacterized protein LOC105256493 [Camponotus floridanus]	NA	10.3176	7.39347	8.70701	8.45006	7.08047	8.70481	7.26299	7.90277	3.20689	7.88512	8.77611	6.98547	8.59195	10.2643	6.71299	7.10138	4.65029	6.72335	7.299	8.12809	8.70024	6.61811	9.32392	8.47437	5.94368	6.47786	7.43383	4.98047	9.66851	7.28199	6.8755	7.34	7.00465	7.10214	9.80269	5.76721	8.73415	7.89821	5.23038	6.8052	8.46003	6.39228	8.21664	0.391879	0.391879	0.86548	0.864807
249	E2A3T1	Aminotran_1_2 domain-containing protein	1.42329	-0.525935	-0.786741	0.357201	-0.440218	0.635174	-1.20098	1.7764	1.74116	0.371474	-0.390448	-2.50946	3.44809	-3.3557	-1.08839	0.516252	0.368384	0.372956	2.4511	-0.710412	0.279453	-2.64987	-1.46117	2.51977	-1.5723	-1.53491	1.44911	-1.80043	-0.674517	0.673138	-1.85496	-1.42767	0.526482	-1.86319	-1.74068	0.447693	1.73176	0.393975	-2.46692	-0.602699	0.384892	-1.98579	0.133832	0.40324	0.40324	0.854333	0.861344
547	NA	NA	-1.50248	1.40246	2.08172	-0.174867	-0.52728	-0.451303	2.49493	-0.280392	-1.28714	-1.93792	-0.656092	-1.91132	1.56742	-0.192501	0.0407029	-3.85154	-1.15715	-0.218361	-0.159439	0.10424	0.952024	1.48471	-1.00007	-2.18939	-0.425819	1.56407	-3.20294	0.166982	-0.932434	-0.62215	-0.204977	-0.666069	-1.7331	-1.11179	0.462668	-0.957269	-1.73125	-0.0460495	-2.73779	-0.549596	0.243672	1.51765	1.24264	0.370446	0.370446	0.872897	0.859097
441	E2AC20	Proteasome subunit alpha type	1.4952	1.23843	-1.3724	0.660461	1.60864	-1.10048	-1.82209	0.81689	-1.32219	0.0874433	0.126915	3.13795	-2.03132	0.711559	0.494901	-2.79299	-0.0438556	0.585645	1.14928	-0.436899	-1.09818	1.71214	1.04836	-0.294573	0.975047	-0.0599368	-0.827747	2.90163	0.916824	-1.76549	-1.53606	0.837859	1.54306	-0.18694	-2.38963	0.203529	-1.38522	-0.348943	1.94997	-0.348718	-1.54783	-0.80311	-3.02906	0.383828	0.383828	0.861445	0.857661
855	E2AW33	AA_permease_C domain-containing protein	-0.669473	0.644782	0.522689	-1.65322	1.37763	-0.344962	-0.180236	0.531773	-3.29308	-0.588854	-1.23818	1.95406	0.817548	-0.913426	-1.02707	0.211798	1.62741	0.340783	2.07562	1.89143	-1.74705	-1.06784	-1.80015	-0.856659	-0.122626	-1.03571	-3.2864	-3.09479	-1.27324	-0.396987	-0.445613	-0.0366701	-0.321369	0.453248	-0.146262	1.23812	-0.527835	-0.216254	-0.493438	0.206775	2.26735	-0.401241	-0.821489	0.355641	0.355641	0.881158	0.856186
622	E2AJS2	TraB domain-containing protein	0.228723	0.673535	-0.718186	0.605361	-0.90397	-1.1128	1.79185	-0.027293	1.6928	-0.227991	-0.160115	-2.29867	-0.89822	1.20663	0.585992	-0.258462	1.71824	-0.842955	-0.363819	-1.22915	0.736326	1.16962	-0.943035	0.361311	0.540064	-0.630112	0.740379	-2.17869	0.0724194	-0.572351	-1.32884	1.36141	-0.0602478	1.30002	-0.0931731	0.141429	-1.66559	-1.7448	-3.34768	0.474784	0.0717134	-0.0662653	0.583045	0.320512	0.320512	0.920142	0.856075
467	E2AD64	Phosphotriesterase-related protein	-1.68858	-3.91731	-1.84386	2.09327	-1.2964	-1.02709	1.5652	-0.93553	0.541046	1.57392	-0.4867	0.456948	-2.40134	0.885552	-1.74001	-0.0974158	1.56077	0.790225	-0.829071	1.33791	-0.0390471	0.797787	-3.32445	-2.13088	-1.54025	-0.00448076	-0.0900217	1.77487	-0.578222	1.40904	-1.16626	2.50167	-0.0646345	-0.51752	1.48864	0.746696	1.6659	0.532816	3.16211	-3.22916	0.724587	-2.13699	-1.08013	-0.422266	0.422266	-0.835771	-0.854038
341	E2A8B1	Transmembrane protein 214-A	-3.46158	0.175675	-0.0695195	-0.425612	-1.1761	-1.27289	0.434603	-1.12553	-0.199948	1.12648	-0.80418	-1.33107	-2.128	0.152382	-2.18826	-1.39358	-3.81694	-0.753777	-0.0916611	0.461444	-0.600319	-0.61108	1.5263	-2.49596	1.16079	-2.49873	-0.0328448	-0.60359	0.681077	-0.140483	-0.224558	-0.915344	1.20138	-0.437972	-1.43956	0.597367	0.796852	-2.10221	-3.76726	2.28212	-0.361329	-0.282027	0.633651	-0.366619	0.366619	-0.868296	-0.853494
1134	E1ZV36	MFS domain-containing protein	2.71565	3.62242	0.659493	1.3242	3.24754	-1.07525	2.04449	-0.554524	-1.84709	-1.38553	-0.552141	0.207423	3.82989	-0.907501	-1.44367	0.795905	-1.7125	-1.0672	-0.509362	-0.15596	1.45407	-1.43575	4.6058	1.62827	1.29513	0.668028	0.370828	2.93709	-4.36943	-1.63118	2.21767	2.77985	1.05656	1.02147	0.526903	0.399721	0.188554	2.27288	6.33997	-0.99005	1.82002	3.75063	-1.61147	-0.517902	0.517902	-0.804175	-0.852976
675	E2AM64	Proteasome subunit alpha type	-1.08951	-0.044334	0.521104	-2.11701	0.278058	0.690737	0.184733	0.573606	-1.28369	-1.08228	-0.744926	2.62705	-1.42796	-0.826234	-2.44539	-0.554139	1.25792	-0.382827	0.0247741	0.163327	1.39061	1.20932	-2.08238	-0.590557	0.451893	1.63412	-0.238272	2.82048	-0.60136	-0.990103	0.584222	-0.160269	0.203106	0.809968	-1.51089	0.870351	0.784442	-1.69164	1.31328	-0.768894	-1.12406	-1.25517	1.68821	-0.335766	0.335766	-0.890253	-0.84886
765	E2ARP5	Peptidase S1 domain-containing protein	-0.0540306	-0.414346	-0.541883	-0.881529	1.16091	-0.529231	-0.908146	-0.670436	-0.759917	-0.483199	-0.440388	-1.23958	-0.11253	0.34998	-0.512296	-0.92022	1.5061	-1.00842	-0.63761	1.02065	1.81667	-1.61987	-0.591423	-1.13873	-1.18425	1.29534	1.44527	-2.98717	0.189718	-0.0829605	1.05544	-0.909725	0.0375851	1.0101	-1.66314	0.793441	0.0251687	-2.06298	-3.90771	-1.96761	0.787445	-0.467878	-2.59531	0.335061	0.335061	0.889137	0.847586
619	E2AJP0	Uncharacterized protein	-0.00735298	-1.89785	-0.689355	-2.03512	0.184692	0.351472	-0.509963	-0.128341	-0.762068	-1.99997	1.13312	4.06431	-2.10853	0.990047	-0.639583	-2.29921	-1.17257	-3.29379	-2.41174	-0.170024	-0.378789	0.585887	-1.94404	1.12429	-0.0892041	-1.06647	0.372036	2.11202	-1.96058	-0.561403	-1.05775	0.286902	-0.0901807	-0.866734	0.229814	-0.614477	-0.874541	1.13673	-1.59872	0.847978	-1.66214	-1.89887	0.334232	-0.363354	0.363354	-0.860742	-0.846025
746	E2AR26	40S ribosomal protein S16	3.48173	1.4101	-0.989205	2.9879	1.98635	-0.776723	-0.091029	-1.11972	-1.21704	0.288323	3.2683	-2.16458	1.63491	-0.569378	-0.591822	0.426072	0.400328	-1.88068	-0.00846189	1.93518	0.0793594	-1.56569	0.345889	0.0739156	1.87588	-0.418775	-1.44155	0.24972	-0.0364447	1.4767	-1.18424	2.01021	0.279677	0.00616581	-1.48101	0.0537402	0.554883	-0.226918	-3.70676	1.57517	0	0.048827	-1.10063	0.385663	0.385663	0.844615	0.84553
968	E2B1T7	NA	-0.436917	-0.96972	-1.83901	-1.01535	0.684997	-1.48074	-1.24377	0.698828	-1.10651	0.387616	0.406403	-2.1276	-0.709864	-0.675109	0.127452	2.17023	-0.743129	-1.24925	1.87511	-1.10272	-0.312124	3.32353	-0.509031	0.597992	0.114454	-0.484967	0.269666	-1.84704	-2.35104	0.109888	-0.727456	-0.932588	1.24528	-0.57886	-0.906799	-1.74377	-1.35552	2.16766	-1.96759	-1.3831	-0.172759	-1.35508	-0.49297	0.335526	0.335526	0.885263	0.845309
1200	XP_025266195.	NA	-2.37441	-0.966604	2.2646	-1.01816	-3.86609	-3.41107	-1.94748	-0.59933	-1.14058	-2.10738	-2.39963	-0.330172	-1.1759	-2.22523	-1.71221	-1.0426	1.15062	-2.66411	-0.00189354	-2.23466	-0.820688	-0.194916	-0.697246	0.149942	-1.07021	-1.72573	-1.79202	-0.916045	-1.5341	-2.00686	-5.67444	-2.5218	-1.86038	-0.716275	-1.92232	-1.28553	-2.34966	-1.15466	-2.97186	-0.668049	-1.07701	-0.691503	-0.830566	0.347686	0.347686	0.871004	0.843831
909	E2AYQ1	Clathrin heavy chain	-1.17055	-2.1038	-1.45034	-3.11848	-0.648988	-1.61212	1.15653	0.57812	0.189313	0.240288	-1.50458	-7.44629	-2.42506	-0.153441	-5.22984	0.848517	0.977226	-4.614	1.15899	-1.55305	-3.57102	-0.552964	1.0629	-3.72021	-0.812854	0.54371	1.97834	-1.98935	-0.716509	0.0866621	-0.480273	-1.23947	0.905114	-0.929468	1.45525	-0.789379	-4.85505	0.749626	-3.6563	-1.55079	0.777893	-3.00606	0.484528	-0.507102	0.507102	-0.796541	-0.843659
946	E2B0I2	Sepiapterin reductase	-1.77502	0.252468	1.47213	1.62893	0.157815	-1.09033	-1.99851	0.87083	-0.380096	0.652851	1.72944	2.32707	0.875834	2.01687	-0.269069	0.00812638	0.513202	-0.844425	-0.508199	-1.99533	-0.652754	2.2559	2.00655	-2.37726	-1.58812	-0.919724	1.66773	0.868441	-0.452314	-0.562074	1.93447	0.482335	-0.766284	-0.6549	-3.28797	0.87958	0.200991	-0.0080104	1.84985	0.616306	-0.524976	1.14328	0.646339	0.35802	0.35802	0.861143	0.84319
850	E2AVX9	Isocitrate dehydrogenase [NADP]	0.533882	0.209889	-1.17445	0.559743	-1.79177	-1.43025	-1.64892	0.0119482	-2.21118	-1.31728	-0.464128	3.79864	1.16123	2.7619	3.29297	-2.0245	-4.28504	-0.434112	0.127017	-1.27762	0.838222	-1.66026	-3.45126	-0.389223	0.805678	0.192861	-4.25001	3.02438	-0.76079	-1.3861	0.652649	1.43488	0.273443	0.579654	-0.431468	-2.15022	0.328505	0.479769	3.92144	-2.52047	-0.475486	1.78723	-0.290796	-0.470659	0.470659	-0.803998	-0.841887
330	E2A7Q8	Complex1_49kDa domain-containing protein	1.9727	-0.954391	-1.19098	-0.327379	2.28967	-0.650688	0.712467	-1.16715	-0.121473	1.43828	-0.586222	-0.904436	-1.10888	0.644892	-1.63846	-0.426833	-0.375899	0.62582	0.341031	-0.727325	-2.25767	-1.28904	-1.11405	0.756789	-0.585818	1.04142	1.14275	0.811951	-1.2869	-0.12965	-2.04608	1.23305	0.835739	1.20456	0.784592	-0.608107	0.840101	0.515128	-3.21783	-0.426129	-0.501678	0.659118	-0.556047	-0.319696	0.319696	-0.8967	-0.840515
852	E2AVY8	Hemocytin	-2.74186	-0.641225	-0.204311	-1.37315	-4.06178	0.151676	-0.0663761	1.70547	0.0372313	1.44263	-2.78182	1.28131	-0.146773	-0.738313	-4.88029	-2.6658	-1.02189	-3.67435	-5.5079	0.888117	-7.02778	0.0382807	0.155676	-1.59131	-2.9954	-2.51969	-3.82658	-2.85287	-0.382357	-1.40322	-1.23149	-0.405349	-0.665878	-1.12211	-0.489431	-2.7977	-2.45771	-0.849222	-2.77675	-4.23025	-1.62945	-3.44	0.477332	0.475417	0.475417	0.798699	0.83835
1150	E2AYU3	40S ribosomal protein S6	2.15134	1.23231	-0.679707	0.853301	-1.55983	-1.60969	-2.23031	-0.913956	1.83236	-1.72793	-1.13336	-2.34414	0.940653	0.779273	-0.823138	-0.744468	-0.154135	-1.01194	-0.555495	0.194006	0.680996	-0.0188726	0.142177	-0.689997	-0.725194	0.275559	2.50745	-1.88793	-0.23713	-0.704525	-0.757553	0.280925	0.586026	0.689944	0.152092	0.541816	1.13382	-1.52657	-0.218782	1.65217	-0.359933	1.01663	-1.17113	-0.319213	0.319213	-0.892339	-0.837314
1372	XP_025271103.1 ras-related protein Ral-a isoform X1 [Camponotus floridanus]	NA	-1.08417	2.14024	-2.11207	-0.102232	-0.455985	-0.239167	1.08607	1.15809	-1.16287	-0.0651366	-0.781924	-1.15701	-3.78451	0.0311347	0.302739	3.38227	-0.400587	-1.26061	-1.47457	0.092227	0.580236	-0.0071087	1.87049	-0.516377	0.846662	0.695203	1.59751	-1.01547	-0.5953	0.128109	-1.05166	0.696529	0.450041	-1.96208	-0.956254	2.3853	-0.716754	0.336969	3.18345	1.89189	-0.891908	0.370156	-0.594729	-0.363823	0.363823	-0.842431	-0.832636
876	E2AX57	T-complex protein 1 subunit delta	-0.210147	-1.79638	-0.051415	3.72532	0.504901	0.713248	0.193702	-0.513153	1.34589	-2.34597	-2.31858	-1.56843	-1.88239	0.705059	-2.45732	1.4692	0.548928	-2.5687	-0.231931	1.15304	-2.44286	0.334257	-0.369275	-1.58128	0.0775577	0.0366603	0.988682	-2.02226	-1.19735	-0.135431	0.994276	-2.25665	-1.40889	-0.418604	-1.07179	-2.50113	0.915795	2.30257	-2.71647	-0.870524	-1.53434	-1.91728	-0.285709	0.379543	0.379543	0.830171	0.831299
535	E2AF	NA	0.728788	0.84951	0.781717	2.95163	0.801966	-3.28775	1.39728	-1.23201	0.573942	0.422795	-1.56624	0.499879	-1.45714	-0.231533	-0.20241	-2.01978	-0.607822	0.0986572	0.512737	0.626431	-1.26506	0.119297	2.01767	-0.893678	-1.35857	2.61893	0.682376	0.00931656	-1.71636	0.804726	-0.340816	0.00279088	-1.95754	1.45942	-0.954153	-2.14876	-0.219017	0.513936	-4.0983	-0.160307	2.11031	-0.460763	-0.869193	0.371066	0.371066	0.833132	0.829398
724	E2APS1	Cytoplasmic aconitate hydratase	-2.03954	-0.394337	-0.610688	-0.508932	-0.0776354	0.35944	1.49648	-1.35131	-0.935909	-0.420276	-0.174964	1.41579	-0.51967	3.67767	-3.99529	-0.504077	-4.73099	-1.72429	-0.0783173	-0.71368	-2.49322	-0.600866	0.995308	-0.900143	2.15013	-1.52409	0.723351	2.12007	1.42356	0.961133	-1.93986	-0.484986	-2.84376	-2.77953	3.39853	-1.29417	-0.502627	0.0662911	-0.272537	-0.561567	0.045019	-0.981819	-0.563857	-0.417579	0.417579	-0.807698	-0.828841
1020	XP_011251504.1 heterogeneous nuclear ribonucleoprotein K isoform X1 [Cam	NA	-0.272248	-1.88261	-0.989346	-4.60102	0.409475	-0.123502	2.55938	-0.879173	-0.739977	1.68693	-2.4126	-2.45406	-3.06857	1.01121	-1.39419	0.200447	-2.37219	0.21214	1.31778	-2.38661	-0.581555	-1.72873	-1.45096	-0.657089	-1.92369	1.11969	-0.00249585	-0.936455	-2.02351	0.25262	-0.199667	1.55356	-1.01803	-0.450205	-2.00215	1.16126	0.330817	-0.342234	-3.11522	0.433102	0.373121	-2.06316	-0.279263	-0.377506	0.377506	-0.826721	-0.827623
1320	XP_025265358.1 17-beta-hydroxysteroid dehydrogenase 13-l	NA	-1.0187	-0.42341	0.000214564	-2.32583	-0.151923	-1.60195	-0.998107	0.42728	-1.08808	1.08145	0.587855	-0.602007	0.26822	1.05963	-2.3286	-1.16758	1.66595	-0.349777	-0.624236	0.434162	-0.0934404	-0.131344	-2.09302	-0.814559	-1.40463	0.546457	-0.192216	-2.26676	0.42898	-0.647283	0.892833	0.435565	0.50893	-0.0934234	-0.0945887	-0.45371	0.379413	1.37711	2.34166	-1.22034	-0.640962	-1.51398	0.139286	-0.297268	0.297268	-0.907405	-0.826817
977	E2B252	40S ribosomal protein S18	2.6583	-0.0181189	-2.13175	1.34704	-0.412835	-0.680265	1.70494	-0.578077	0.403319	0.192798	1.73455	-0.328035	0.678449	-0.62426	-1.71188	0.555936	0.781932	-0.142662	0.731004	0.714175	-0.992585	2.03363	-0.69598	0.794996	0.823902	-0.5849	-1.42769	-0.907385	1.27691	-1.88253	-0.550817	1.67353	0.750428	-0.223446	-0.0104975	-1.44876	0.570428	-0.154371	-1.49742	-1.24535	0.343522	0.758588	1.31112	0.308427	0.308427	0.88953	0.826351
355	E2A915	Battenin	-3.43991	0.356081	-1.85016	0.781248	-0.846696	0.283365	-2.98239	0.638111	0.181188	1.14216	-0.865427	-3.76626	-0.130705	1.81574	0.534608	1.72577	0.157472	-2.69837	-1.32276	1.70325	1.07059	-0.933142	-1.05786	-0.226709	-0.446148	-0.565319	0.630875	-2.31645	-0.946397	1.17793	0.567647	-1.17	-0.815132	0.406028	-2.48954	-0.0460712	-2.31233	1.44739	4.21804	0.757177	0.347819	-0.259219	1.7698	-0.399691	0.399691	-0.810863	-0.824693
1081	XP_011258887.2 maltase 1-like [Camponotus floridanus]	NA	0.918943	-2.50408	0.375309	-4.60222	-0.200976	-0.0411176	3.98054	-2.30719	0.777432	-0.490002	-1.07145	1.64292	1.03596	0.650093	-0.960173	-0.457745	-3.85363	1.99934	-1.52706	1.44664	0.507057	-0.903542	-1.0848	0.744578	1.46481	2.54841	1.16026	-0.617791	1.02522	0.622181	-1.15933	2.369	1.19089	0.211273	-0.748228	0.40637	-0.737297	-0.940707	-6.09323	0.161548	2.13397	-2.34441	2.12131	-0.46593	0.46593	-0.784861	-0.823511
1123	E2AUA4	ACB domain-containing protein	-1.57468	1.68175	0.289264	0.740809	1.37457	-0.13966	1.68148	-1.14258	-0.131562	-0.411686	-1.82632	5.89804	-0.538243	0.330762	1.95713	-0.842625	-0.349819	0.123269	1.7701	-1.36318	0.149995	0.965488	0.532092	2.05387	-0.466447	1.79402	0.302454	-0.261928	-2.6149	-1.3406	-1.81399	-0.157088	-1.60217	-0.480142	0.417242	1.17208	0.53669	-1.92953	4.57448	0.93382	0.235036	0.909489	-2.50643	0.41109	0.41109	0.802766	0.822356
1033	E2A7S3	Glycogen debranching enzyme	-5.61127	-0.644673	0.551336	-5.39639	0.200469	1.04292	0.444773	1.99147	-1.67675	-1.62704	-2.44063	0.0945733	-1.11752	-1.4755	-8.50035	-0.68495	1.80421	-0.1265	-0.58929	0.115207	-0.660009	0.749268	-2.09215	-1.06544	0.196789	0.666821	-0.672129	-0.922553	0.465688	0.0982984	-0.81258	0.737912	-1.1746	-1.10632	-0.26358	-1.78213	-2.04865	0.617699	2.46243	-0.42637	-2.18015	-4.08904	-1.31381	-0.48458	0.48458	-0.776371	-0.820205
720	E2APK3	Thioredoxin domain-containing protein	-1.37284	0.629295	-0.406455	-0.79326	0.0126547	-0.878149	-1.37537	-1.0323	0.914982	-1.25316	0.302075	1.00582	1.32566	0.567482	-1.42521	2.31758	0.518814	-0.0440154	0.206662	-1.73958	-1.22956	0.975853	0.948598	-1.36569	-0.686755	1.07267	-0.581057	1.12907	-2.33048	0.480689	2.25104	1.80663	-1.16552	-0.596692	-0.204397	-0.126095	-1.13811	-0.795903	-2.53336	-1.00584	0.646309	-1.14054	-1.59694	0.314727	0.314727	0.867409	0.817524
973	E2B223	Superoxide dismutase [Cu-Zn]	0.885627	1.51573	0.256964	-0.181662	2.05601	2.18156	-1.86017	-0.10401	2.2287	1.18961	0.0170046	4.42356	0.252208	-0.636579	-1.8514	1.01749	1.56968	0.902407	-0.852125	-2.47478	-0.469499	-0.0907941	2.71495	-0.469891	0.132641	-0.904965	1.17877	3.58554	3.65637	-0.749511	-3.42781	-1.34265	2.40615	1.09684	1.50504	-1.21902	2.7335	0.324865	6.54936	3.1087	0.875132	3.60567	-2.05557	-0.477697	0.477697	-0.772522	-0.815135
496	E2AE42	MFS domain-containing protein	0.0422554	-6.06325	0.927578	1.28071	-0.656031	0.133764	0.638965	-1.48675	-1.9631	-0.174158	0.535574	0.745748	1.18525	1.68148	0.488948	2.48818	-1.45618	1.06021	0.592819	0.215064	-1.90589	-2.94921	-2.58675	-0.284516	-0.00267047	-0.857464	2.72175	0.391562	-1.82821	0.357701	-2.00543	-0.538077	-0.429649	-3.66736	0.337997	0.67726	5.06193	0.559951	4.08874	-0.505834	0.277132	-2.4934	1.14639	-0.46451	0.46451	-0.772594	-0.812095
395	E2AAG9	Endoplasmic reticulum protein ERp29	-0.946235	0.362671	-0.592183	-0.565013	-0.524923	0.444267	-0.520303	-0.93829	1.42812	-2.33298	-1.0553	-2.07857	-1.73853	-0.915799	-0.354343	0.00096441	0.37853	-1.36167	-0.44625	1.12888	1.4086	-2.1647	-2.22483	-0.482654	-1.69537	1.45529	-1.43581	-0.781672	0.713221	-2.78123	0.684081	1.72188	1.1252	0.466571	0.39826	-0.189147	0.869008	-0.784218	-3.12265	0.80924	-0.202119	-1.56047	-0.642461	-0.319894	0.319894	-0.852876	-0.811903
1030	XP_011252500.2 protein CREG1 [Camponotus floridanus]	CREG	15.016	14.4533	14.7314	13.2914	13.6292	14.4513	13.5113	14.7443	14.1797	14.5748	14.0782	12.4635	13.6132	15.5009	14.1319	14.7309	14.3889	14.1523	13.227	15.2654	14.3062	13.9304	15.3987	13.9394	13.9001	13.8725	13.0595	12.0673	14.8948	14.5745	13.4589	15.2486	14.2334	14.4463	14.5489	13.8983	14.3164	14.7671	11.2721	14.2788	14.8503	13.3739	14.8941	0.256103	0.256103	0.972914	0.811291
1264	XP_025264147.1 uncharacterized protein LOC105250349 [Camponotus floridanus]	NA	-3.58184	-2.50914	-3.9863	-0.631228	1.65641	-1.97213	-6.33618	-2.63135	1.63976	-2.97281	-2.36216	1.26505	-0.508762	-2.47671	0.623236	-3.36058	-3.75314	-2.23393	0.46601	-5.87806	-3.52982	-0.922366	-2.41839	-1.70278	-0.261321	-5.27236	-0.818025	-2.74267	-3.36902	-3.29472	-2.68081	-3.03607	-5.04601	-3.7045	0.0855327	0.669239	-3.889	-1.36075	-1.10289	-3.06429	-4.44997	-1.18713	-3.41592	0.464154	0.464154	0.769249	0.808981
209	E2A1L1	Translocon-associated protein subunit alpha	-1.70531	-0.508733	-0.00223973	-1.28657	-1.77404	0.516312	-1.50976	0.422066	-0.515423	1.84835	-1.21153	-1.1686	2.54916	0.473356	-1.27139	1.88562	0.746086	0.383199	1.81798	-1.92594	0.314665	1.42218	-0.524833	1.24763	-0.767453	0.851959	-0.573335	1.29264	0.378309	-0.137915	-1.16093	-0.70935	-0.363748	0.429095	-0.213433	0.098439	0.215486	-0.621968	-2.34307	-1.6626	-1.7103	-0.897896	-0.402341	0.307957	0.307957	0.857854	0.805844
1022	E2A4X5	Methyltranfer_dom domain-containing protein	-1.90365	-0.642766	0.871014	-1.23925	0.911317	-1.21864	1.12113	0.664945	0.76181	1.63005	0.810723	-1.81197	-0.334431	0.171186	-1.51803	-0.350469	0.671014	-0.590637	-0.472092	0.654205	-4.98706	-0.432518	-0.789219	-0.641188	-0.0592997	0.358541	1.05379	0.0832219	1.66205	-0.43484	-1.16373	0.0448543	-0.557904	0.0334314	-0.296762	-1.48248	0.172761	-1.05757	0.907714	0.91318	-0.13653	0.534064	-0.748312	-0.30809	0.30809	-0.857434	-0.805681
1268	XP_025264410.1 proton-coupled amino acid transporter-like protein CG1139 [Camponotus floridanus]	NA	-0.407996	0.326149	-0.5699	-1.84907	0.0437605	0.553326	0.130661	-0.647182	-1.79879	-1.45465	0.995269	2.72028	-0.877734	0.562363	-0.291905	-0.0775139	0.0855144	0.832356	-0.142755	-2.33061	-1.78689	-0.37693	2.84355	-0.0713021	-1.0752	1.25125	-1.48244	-2.45204	1.40075	0.273018	-0.887606	1.48791	-0.234437	-1.36101	-1.35187	-0.836018	-1.87412	-1.11039	1.03242	-2.12751	-0.14741	-1.0075	1.0538	0.322998	0.322998	0.838532	0.804409
665	E2ALM7	Thioredoxin domain-containing protein	3.53388	1.76592	-0.171191	3.43902	1.31945	-0.430312	1.766	-0.610704	0.0303111	1.1782	0.752316	2.60336	4.36169	0.258548	1.89726	-0.286084	-2.18261	-1.16688	-0.662871	0.626579	1.29185	1.73444	-0.719778	0.780236	0.162236	2.99494	0.51785	3.57602	-0.260731	-1.50578	1.92008	0.590794	-0.120651	-0.396473	-1.48826	-0.177908	1.03383	-0.726537	1.419	0.830782	-0.11178	1.26779	0.0778451	0.364679	0.364679	0.802575	0.802579
93	E1ZWI4	Uncharacterized protein	-1.69835	-2.81329	-1.80606	-1.44407	-0.363015	-1.34418	-0.0174893	0.62392	-0.120063	-0.918801	-1.58051	-1.25485	-0.639088	0.0910661	-0.258755	0.674625	-0.0590771	0.411856	0.0926849	-0.351523	0.51123	1.56769	-0.194677	-0.173124	-1.52796	1.04269	-1.34128	-3.30078	-0.347993	-0.898867	-1.49589	0.188583	-0.848625	-0.97148	-0.0466004	0.761944	-2.3299	-0.655959	-1.9497	0.863677	1.03465	-1.07518	-2.26016	0.293088	0.293088	0.86952	0.800167
89	E1ZWF2	RING-type domain-containing protein	2.31059	1.31037	-0.252125	-0.339659	-2.95756	1.028	-0.669957	-0.918783	-3.02442	-0.350017	-3.3202	1.97218	4.27718	0.613751	-0.168339	-1.42326	-0.113484	-0.41048	0.988427	0.919565	-0.811606	-2.01313	0.39718	1.15696	-0.674185	1.34655	-1.93399	-1.22929	1.62138	0.614612	-0.137143	-0.0405416	0.417642	-0.48905	1.68035	-0.797224	0.493537	1.98332	-4.24996	0.502972	3.36932	1.74399	0.198412	-0.407396	0.407396	-0.776088	-0.798564
227	E2A2G2	Protein EFR3-like protein cmp44E	-0.778971	-1.8394	-2.40601	-0.969531	-0.109637	1.13879	0.805231	1.84889	0.406296	1.53762	1.63016	-0.583813	-1.98332	0.636078	-0.748339	1.21869	-0.371619	0.566558	-0.911692	-0.985743	-0.224442	-0.560313	-1.18725	-0.873952	0.206961	-2.76171	0.447209	-0.043687	-2.71196	0.586387	-1.47617	0.271726	1.14423	0.14154	-2.76668	2.51149	-0.383898	-2.80415	-2.03983	0.488468	-1.41355	1.04171	0.311894	0.33786	0.33786	0.81307	0.796016
950	E2B123	MFS domain-containing protein	-0.627519	1.47844	0.641004	2.28451	-1.12833	0.303763	-1.97539	1.07456	1.71589	0.615754	1.20256	2.03475	1.37383	0.141358	-0.64948	1.45816	-2.75631	0.182146	-1.66179	-0.818183	1.05656	2.82413	3.02544	-1.42571	-0.255492	-1.70656	-1.73297	4.12386	0.06502	0.388987	1.6948	1.26131	0.166823	1.14694	1.10808	0.199182	2.91677	-0.383259	7.06437	-0.101832	-0.662462	2.6108	2.32997	-0.427568	0.427568	-0.764842	-0.795292
1219	XP_0252619	NA	-0.498006	0.271988	-1.60039	-1.17036	-2.48443	0.484962	-0.483583	0.814536	-0.234617	-0.682071	0.447304	1.0254	1.333	0.147594	-2.2062	0.419823	-1.88699	0.998299	-0.671597	-1.82144	-3.73853	0.706342	-0.977959	0.352822	-0.709904	-0.220517	0.820852	-2.63777	-1.28734	-1.00342	0.937371	-1.08241	1.66912	-0.7013	-1.14794	-0.0568753	0.0895659	-1.4578	-1.16334	0.511734	1.03449	0.496286	1.57092	-0.314072	0.314072	-0.833815	-0.794745
382	E2A9Z9	MFS domain-containing protein	1.87337	1.91203	-1.05352	0.980518	1.51725	-2.25985	1.13814	-1.21506	0.440452	-0.587665	-0.813887	1.17393	0.0351504	-0.774751	0.973928	1.07055	-3.25311	-1.30275	-1.97586	-0.234737	0.622139	0.666508	5.27069	0.702685	0.324282	-0.0149059	0.465463	1.46509	-0.264637	0.925636	0.123219	-1.18542	1.00493	-0.646388	0.0421971	0.153571	1.94242	-0.904184	5.12065	0.149638	0.928432	1.00556	-0.11806	-0.378249	0.378249	-0.784494	-0.794394
642	E2AKF6	DOMON domain-containing protein CG14681	2.79367	0.42499	3.23009	2.6683	-4.8614	-3.05796	-2.25414	2.24262	-1.5306	-1.86746	3.03543	5.8908	3.35964	-1.14405	2.5087	-3.35226	-2.13513	0.620815	-2.8202	1.28345	1.70342	2.93027	-1.96839	2.97093	-2.96796	-0.148911	0.98702	0.706219	-3.55005	-2.70026	-0.77151	0.297394	-1.11077	0.00909882	0.803729	1.89767	0.882438	2.69826	-2.69637	-1.44579	3.20482	0.307046	-4.0311	0.567714	0.567714	0.731788	0.791596
251	E2A3Z5	60S ribosomal protein L11	2.79632	2.84337	1.47445	3.39584	1.85085	-1.16177	1.24042	0.0945582	1.32215	-0.357056	1.1312	2.43423	2.94555	1.2338	0.108044	-0.943434	0.0298824	0.232366	-0.210522	-1.05279	2.73162	-0.288869	1.32369	-2.68798	0.995301	0.226551	-1.64391	3.37125	-0.0935129	-0.0645402	2.98941	0.446082	-1.58471	-1.68994	1.07195	1.20938	2.69566	1.58321	1.80941	2.22515	-0.776575	2.45448	0.178044	0.371825	0.371825	0.781424	0.789159
184	E2A0J7	LETM1 and EF-hand domain-containing protein anon-60Da, mitochondrial	-0.111506	1.23427	-1.59201	-1.59213	-2.22041	2.48072	1.00665	0.350642	-0.816312	-1.12409	3.14445	0.289809	-1.76116	-0.0634369	2.00347	-0.559235	-1.58545	2.13508	-0.994848	0.340811	-0.804334	0.816694	-0.0460675	-1.35245	2.0458	-1.89239	-0.757579	-3.60718	0.218076	0.296708	0.352433	2.29195	0.0083955	0.624429	-1.7834	-1.42219	-1.2822	0.876475	-3.15989	-0.389372	0.170506	-0.700138	2.50637	0.370894	0.370894	0.781227	0.788594
701	E2ANK9	Phosphotransferase	0.137947	-1.13412	-0.121004	-1.06432	0.377525	0.754875	0.441448	-1.9693	-1.56328	-1.453	-2.86391	0.704839	-1.15766	-0.248443	-1.53231	-0.336699	0.973688	-0.571266	-0.877883	-1.43542	1.17996	-1.1291	0.223399	2.1884	-1.43051	1.01731	0.766725	0.940476	-0.626503	2.83017	-1.53393	-1.94404	1.91854	-0.812687	-1.06921	-1.58516	-0.821499	-1.10356	-0.445809	1.32114	-0.998197	-1.7691	-1.52449	-0.316512	0.316512	-0.820483	-0.787423
468	E2AD81	Molybdopterin molybdenumtransferase	-0.68167	-0.407156	-0.51216	0.281839	0.655485	0.346932	0.92644	0.900641	-2.41485	0.153567	-1.08968	1.65795	-2.90366	2.4487	0.0249551	0.298933	-1.08242	0.253244	-2.57448	-2.20702	1.14618	-1.26412	0.334449	-0.955469	-0.318988	0.0949018	1.30936	-3.65365	0.801065	-1.19724	-3.80389	-2.2156	-0.66097	1.76122	0.0533818	-0.298777	-2.39185	0.246557	-2.03528	-0.69581	0.852999	-2.7337	3.30719	0.378558	0.378558	0.774795	0.786649
537	E2AFQ5	Actin-5C	4.90458	4.23117	2.40298	4.06661	1.8992	2.49175	2.37175	1.44142	0.559686	1.13186	2.32212	4.0886	4.44624	0.898489	2.41143	1.69639	-1.24076	1.63096	1.6162	2.8339	2.57076	-1.04206	3.05995	2.78138	1.38502	1.3989	1.11977	3.8828	3.35728	1.94872	2.81299	1.63004	0.488016	1.71174	3.28663	2.30856	3.38518	1.99196	5.63007	0.816426	3.27452	4.06277	3.90122	-0.350299	0.350299	-0.788028	-0.784149
474	E2ADD9	MFS domain-containing protein	-0.974558	0.167039	-0.0750617	1.95744	-0.000604048	-0.529298	-0.0900764	-0.00691491	1.09909	1.13798	-2.07112	-2.92003	1.87552	1.09881	2.07653	-0.384335	-0.245607	-0.527101	-0.538386	0.203062	-0.0574736	-1.31454	0.317883	1.26128	0.276819	0.187618	-0.391281	0.588817	0.612677	1.56213	-0.0165631	-1.44539	-1.10737	0.148948	-0.572108	-1.02881	-1.22582	-2.64402	-3.65466	1.10603	-1.85032	1.01592	0.946814	0.320084	0.320084	0.810929	0.783236
1368	E1ZY72	Transket_pyr domain-containing protein	2.48768	1.68408	-3.50772	0.0213242	0.0717766	1.67874	-1.29281	2.14361	-1.35001	-2.50558	-0.688721	0.835597	1.07282	1.67222	-0.76506	1.95772	-1.35046	-3.89434	0.901011	0.209573	0.68133	-1.10427	1.11644	0.585092	0.29067	1.51741	-0.211132	0.280712	0.938687	1.314	-3.32654	2.39361	2.66012	1.35461	0.683314	0.448334	1.8366	-4.63496	0.786549	0.0460463	-0.396512	1.7376	-0.116918	-0.406105	0.406105	-0.757739	-0.782482
574	E2AHQ7	NADPH--cytochrome P450 reductase	-2.40896	1.11358	-0.787649	-2.27615	-0.879132	1.69993	-2.00439	0.558027	-0.559338	-2.39388	-0.465673	-1.51393	-1.90758	-0.438971	-1.23291	0.542305	1.37858	-0.719527	0.1792	1.07884	-0.109521	-0.0734056	-1.63849	0.682661	-0.191814	0.31441	-0.000872119	-4.54384	-1.94203	0.931409	0.236211	1.11118	-2.70145	-2.66472	-1.31223	0.773608	-2.58975	-0.361102	-3.09813	-1.53152	-1.04878	-0.896103	0.774398	0.343834	0.343834	0.790227	0.782427
510	XP_011256606.1 uncharacteriz	NA	-1.59997	1.21956	0.497909	-0.758896	-0.260574	-0.708721	-0.427327	-1.20308	-2.55364	-0.330439	0.323525	-0.304547	-1.74028	-1.66856	-2.45179	0.72808	-0.427238	0.233085	0.58145	0.807061	-0.3934	0.781537	-3.25841	0.14306	-2.14099	-2.56117	0.192199	0.417273	0.247237	0.516459	0.865553	-2.42806	1.08536	1.21222	-0.137227	-1.88841	-0.489656	-2.15836	0.471799	0.778826	-0.274192	1.15245	-0.0729988	-0.308076	0.308076	-0.819128	-0.780402
357	E2A931	Leucine-rich repeats and immunoglobulin-like domains protein 3	1.85831	-0.416537	2.87258	-0.488142	-0.603309	1.98404	-0.313111	1.11442	-2.21844	-2.33968	2.01847	6.73162	-3.40835	-0.0840017	-0.223538	-1.35762	-2.27994	1.38714	-0.0384321	-2.16953	0.0268059	-1.51679	-1.80556	-2.49991	-1.28424	1.03072	0.903593	-4.05232	0.0951664	0.565955	0.114008	-0.607682	-0.674691	-0.229165	-0.874292	0.835781	0.61231	-1.4781	0.77051	-1.52422	0.0320175	-0.673408	-0.586205	0.421009	0.421009	0.747857	0.778486
454	E2ACN8	Cytochrome c oxidase subunit 5A, mitochondrial	-1.25614	-1.22833	0.324979	-1.5751	-0.234435	0.792303	-0.016249	0.752536	1.48164	-1.20239	-0.704628	-3.11816	-0.782435	-0.743195	-2.06176	1.82456	0.290712	-0.69345	1.38664	1.92189	0.303353	-0.895106	0.958724	-1.23597	-0.104649	-1.47308	-3.15973	3.55422	1.06102	-0.533578	1.20682	1.2492	-0.597278	-1.08593	-0.0188176	-1.3086	0.427082	0.161111	2.03623	-0.622416	1.95928	2.27977	-0.816732	-0.343421	0.343421	-0.781698	-0.775738
388	E2AA52	Protein ROP	0.677216	0.387585	-1.03572	2.58656	0.508416	0.5621	-0.47085	-1.24563	-1.77267	-1.80692	-1.09505	-3.16074	2.75521	0.675074	-2.49157	1.05936	0.643275	0.0351962	0.339534	-0.608962	-0.285437	-1.39217	-1.57781	-1.65401	-1.31728	-1.45575	-0.971533	-3.90434	-1.02958	-0.508657	-0.360851	-0.303022	0.0908103	-1.5246	3.1744	1.11908	-0.207074	0.44952	-2.04129	-0.685045	0.456093	-1.566	-0.466296	0.343358	0.343358	0.780829	0.775044
797	E2ASV0	Lipase domain-containing protein	2.07076	0.485661	0.318631	-1.54652	-0.0941566	-1.05464	2.01208	2.22269	-1.98202	0.370167	-1.29712	-1.62997	1.34813	-0.435579	-0.964032	2.13829	-2.73457	-0.16135	-0.57252	1.07577	-2.50858	0.279754	0.182816	1.28721	1.46968	-1.65459	-0.884315	-2.1182	1.2877	-1.0515	-0.57152	-0.6499	2.1343	0.338662	-0.641517	-1.97364	-1.41708	-2.97744	0.0251174	-0.0555745	1.05192	-2.39367	-0.26668	0.345387	0.345387	0.779275	0.774914
450	E2ACE9	Vinculin	0.741805	-5.62445	-3.18427	-3.13532	0.189773	-0.379797	-0.0890841	1.29203	-0.836069	-1.10481	-2.2069	0.383707	-2.16745	-1.65467	0.0705185	1.18637	1.28029	-1.5623	0.899935	-0.473391	0.875204	2.62994	0.148591	-2.53026	0.0720301	-2.25946	2.00578	-0.779356	-0.469839	0.609378	-2.94134	1.55495	0.143851	-0.80396	-1.34074	0.129054	-1.99978	-4.00099	-1.53807	-0.643167	-1.37249	-1.29492	-1.38316	0.389066	0.389066	0.755319	0.774577
887	E2AXQ0	NA	-1.39756	-0.219625	-1.01157	-1.87944	-0.275886	-0.254819	0.448652	0.741883	1.07491	2.05539	1.33293	-1.16031	-1.16778	1.04054	0.388384	0.631017	-1.50556	-1.04089	-0.934736	-0.508246	0.0832324	-0.769138	-0.160242	0.954048	1.35269	-0.521785	1.46397	0.466874	-1.62386	1.35814	0.643716	-1.02412	0.208866	-1.25873	0.946935	-0.488952	-2.1006	-0.226871	-1.6205	2.19498	-0.00336954	0.392902	0.642908	-0.283029	0.283029	-0.841798	-0.77399
153	E1ZZF5	Reticulon-like protein	-0.658104	-2.0189	0.370176	-3.11335	-0.35288	2.10323	1.31715	-0.426817	-0.983297	0.974581	-0.110662	-1.46615	1.08995	0.101808	1.57138	-0.122847	-0.74664	0.138167	-0.949042	-0.239068	0.344746	-0.0119193	-0.279436	-2.498	1.50794	1.03765	-0.394586	1.89514	0.747124	1.23186	3.80637	1.5494	-1.76838	-0.343137	0.0740508	0.298583	1.08369	0.123253	-3.49883	-0.0966339	-0.486167	-1.02829	0.348967	-0.33028	0.33028	-0.775151	-0.763642
1277	E2AG27	Thioredoxin domain-containing protein	-1.00826	1.82394	-1.00772	3.78595	-0.526325	0.131165	-0.561472	-1.44425	-1.92629	0.353895	2.90286	9.48235	1.53607	-0.749875	0.0786454	1.12965	-1.78263	0.880638	-1.73616	0.501154	2.37943	2.10359	0.647165	1.26284	1.36697	-0.244285	0.132607	5.96685	0.954014	0.85075	4.3419	-0.663857	0.537893	-0.221116	-0.777837	1.81944	3.53451	-0.635459	5.89075	-3.6445	1.28351	5.05136	-1.25422	-0.538757	0.538757	-0.706255	-0.762817
360	E2A945	Proliferating cell nuclear antigen	-0.71407	-0.0933538	-0.372021	-0.878099	-0.615348	-1.14154	-1.03096	-1.23019	1.19816	0.320758	-4.98942	-1.27383	0.136899	-1.94669	-0.0753091	0.861931	-0.0225708	2.4737	0.104728	-0.591439	1.40671	-1.31882	-1.82423	-0.354125	-1.66266	0.862585	-1.00991	-1.08944	1.03441	-0.0481046	0.339497	0.72761	-1.07037	0.711277	0.180533	1.43417	0.972366	-1.34776	-3.82128	-0.101372	1.88459	-1.01634	-0.192767	-0.326645	0.326645	-0.771527	-0.758883
208	E2A1K5	NA	-1.56771	-2.63588	-1.58899	-0.873124	0.256651	0.916201	-0.42667	-1.11366	3.09003	-0.283931	-3.32191	-2.5514	-2.26521	0.340027	-1.72772	-2.14575	1.18933	0.2993	1.64409	-3.57415	0.42884	0.560705	-0.820847	-1.69714	-0.489836	0.000235434	1.81357	-2.61739	-0.869772	-0.734425	-0.705327	-0.0252348	-1.23461	-1.43775	-0.958822	1.23826	0.926806	-0.0716799	1.01293	-1.10903	-0.939401	0.422367	0.0949848	-0.334058	0.334058	-0.761634	-0.755539
109	E1ZXE6	40S ribosomal protein S23	1.19805	1.88144	0.589229	0.551746	-0.252689	0.0473777	-0.0786018	0.294898	-0.109987	0.562229	0.988859	-2.64894	1.6571	1.30792	-0.462785	-1.137	-0.798575	0.508624	1.0468	-0.00812746	1.1967	-0.173763	-1.90546	0.821579	-0.724143	-0.502745	0.0164326	0.221123	-1.80351	-0.740531	0.868398	-0.163154	-0.391318	-0.455668	-0.83506	-1.00963	2.37092	-1.82932	-0.374246	0.772832	-1.21639	2.37255	0.70176	0.280007	0.280007	0.815911	0.755391
862	E2AWK6	ML domain-containing protein	3.27085	2.69048	2.70238	3.07936	0.970216	-3.15735	1.87818	0.403136	1.09331	4.23072	7.78548	10.6803	5.2481	3.24648	5.36356	-1.14887	1.26666	1.72624	-0.153675	5.23924	-1.92989	2.20579	3.06652	5.40789	2.47517	3.1552	-2.03532	5.24762	6.6209	-1.00709	3.0936	-1.31541	0.330124	-0.957336	3.7965	-0.913709	5.46286	-1.2803	7.70858	-0.489975	-0.14125	4.60389	-0.818927	0.65099	0.65099	0.68799	0.755297
123	E1ZXY9	Peptidoglycan-recognition protein-LB	0.833941	-1.6751	-0.166455	-1.93716	0.895273	-0.15689	-1.79716	0.0426523	0.159441	1.75468	-0.150501	-0.654203	-3.28224	-0.634818	-0.856619	-2.57134	-0.707281	-0.158137	0.524902	-1.00531	-0.696356	1.52811	0.101187	1.36036	-0.715864	-1.62524	-3.06894	0.11739	0.427813	-3.27984	0.575714	-1.23838	-1.62726	-0.320646	-0.352273	-2.35111	-1.0798	-1.24303	-0.316077	-0.706941	-1.74953	1.34332	0.553854	0.303547	0.303547	0.784939	0.753835
676	E2AM75	Peptidase_M28 domain-containing protein	1.14689	-2.78696	-2.62002	-2.81498	-0.267874	-0.140959	-2.89843	-0.286088	1.26832	1.50203	1.17405	-1.12706	-2.39105	-0.0962843	1.02049	-2.72348	-2.47834	-2.15715	1.12431	0.667482	0.471417	-0.445786	-1.87012	0.367452	1.94073	-0.951252	0.934727	-0.643348	0.80824	-0.614061	0.402572	0.106591	-1.98664	-2.2675	-1.53517	0.783149	-0.39346	-1.10796	-2.90635	-1.26205	0.975687	0.26569	-0.734261	-0.336513	0.336513	-0.756957	-0.753244
543	E2AFY9	Peptidase S1 domain-containing protein	-2.19488	0.888985	-0.21412	0.815035	0.604957	0.898651	-0.425214	-0.778471	0.142883	2.48325	1.03587	5.73446	-1.86109	-0.581466	-1.02937	-0.824283	-0.595491	0.752441	-0.362677	-0.714314	-2.46029	-1.38534	-0.378037	-1.1858	0.662142	0.91927	-0.852222	-0.22154	0.0690182	0.288571	-0.869073	0.128444	0.233995	-0.529707	2.23787	-1.83051	-1.3293	-0.813208	-4.60272	-0.538291	0.695936	-1.22923	1.24025	0.356805	0.356805	0.742605	0.751446
316	E2A6X9	N-sulphoglucosamine sulphohydrolase	-0.502817	-1.03936	-0.69947	-0.234357	-0.641361	0.0870112	-0.877258	0.974089	-0.419628	-1.03722	0.185081	3.81527	0.448044	0.0295869	0.0860016	-1.92958	4.63405	-1.10057	0	-2.61949	-0.406711	-1.28314	1.04084	-0.392232	0.438487	-0.0669117	-0.0819481	-1.29099	-0.850615	-0.757074	-2.97345	-0.78538	-0.395041	1.684	-0.00923761	0.491789	0.584678	0.59727	-1.65781	-1.37532	-0.0054072	-0.94299	0.122501	0.318459	0.318459	0.767809	0.751348
393	E2AAF9	GTP cyclohydrolase 1	0.554797	1.71992	-1.3185	-0.29946	-2.46003	-0.252939	-1.72158	0.606456	0.441287	-0.185937	-0.849508	1.47227	2.48273	0.108165	-2.03271	-0.0623367	-1.30601	-3.17367	2.11473	-0.842099	-0.254576	1.7816	-1.54699	0.0489354	-0.907323	-2.38908	-0.484837	3.57968	0.717516	0.962227	2.92069	-1.10288	-1.28006	-0.791263	-0.991523	-0.212965	0.786502	-4.27636	3.13349	-1.81069	2.00805	3.74987	-0.0523102	-0.398834	0.398834	-0.724337	-0.751348
1223	E2AN97	Laminin subunit gamma-1	-0.535428	-1.65611	-0.856741	-3.481	-4.00708	-0.692007	0	1.09781	-1.73176	2.22018	-1.44975	0.40413	-0.497418	-1.11325	-0.595421	-0.555202	0.599257	-0.968933	-4.51042	0.950718	-3.14989	-1.83556	-1.86277	0.83382	-2.50895	1.18066	1.08303	-2.58687	-0.720328	-0.120263	-2.55326	-0.783724	-0.17128	2.11689	-0.714425	0.351316	-1.05806	-1.92675	-2.73072	-0.430187	-0.0454443	-1.91447	-1.38097	-0.349333	0.349333	-0.74303	-0.748514
856	E2AW41	Minor histocompatibility antigen H13	-2.02782	-0.231575	0.0541604	1.2276	-2.33418	1.91763	-0.445772	-0.719638	0.221268	-0.745295	0.177632	-3.83376	1.38997	1.60848	-2.12855	0.808839	0.159859	2.38217	-0.252133	0.456169	1.75932	0.237579	0.36637	-0.771346	-0.638204	1.79577	0.71661	0.345972	-0.695537	-1.30753	-0.389748	0.815193	1.16334	0.131655	0.802917	-0.588391	1.1725	-1.81589	-2.54599	0.023505	-2.37232	-1.18777	-1.00961	0.319844	0.319844	0.76218	0.748044
471	E2ADC0	Glycylpeptide N-tetradecanoyltransferase	-2.86406	-0.82406	0.248133	-0.566924	-0.18537	0.823745	-1.9582	0.354565	1.32417	1.08717	-3.13675	-1.25711	1.99355	2.06753	0.158383	-1.65924	-2.60366	-2.82442	1.76128	-1.69763	-2.09784	-4.58377	-1.76857	-0.621613	0.0179278	-0.930729	0.0821619	-1.08944	0.0983844	-0.234606	-1.00401	0.400363	1.13235	1.50736	-1.04812	-1.28304	-1.49483	-0.0260199	-4.02948	0.507953	-0.542961	-0.050003	-0.179428	-0.352311	0.352311	-0.74021	-0.747579
337	E2A7Z9	Protein 5NUC	0.320131	-1.09224	-2.60579	0.219832	-2.0506	-1.21662	-3.9228	-0.677076	-0.992678	0.179459	-1.43789	-1.67956	1.98061	-0.860415	2.21217	0.976381	-0.525286	0.252704	0.13999	0.828469	-1.43082	0.203108	1.93312	-0.469582	1.43064	-0.182044	-0.857648	3.40864	-0.55029	-1.48286	-1.69066	0.295216	0.273229	-1.42039	-1.3388	-1.28911	-0.536247	-0.804866	3.48987	1.60362	1.24668	-3.03361	0.993873	-0.356275	0.356275	-0.737801	-0.74734
396	E2AAH1	Serine/threonine-protein phosphatase	-0.322995	-0.791274	0.36153	-0.217184	-0.322814	-0.135184	0.790678	0.122822	0.469263	2.34329	-1.01893	0.0331789	-0.462796	2.37989	2.49157	-1.01351	-1.74756	1.61131	-0.144432	-2.65379	-2.26865	-0.762269	-3.26732	2.19959	1.6095	-2.03873	2.17828	0.343702	-1.77338	1.59622	-0.710045	1.15646	-0.258786	0.627864	3.67754	-2.96095	0.992803	1.03684	-1.93907	-1.83811	-0.373253	-0.0740842	-0.186158	-0.360058	0.360058	-0.734697	-0.746383
381	E2A9Y9	Short/branched chain specific acyl-CoA dehydrogenase, mitochondrial	0.52544	-2.79393	1.03528	-2.02593	1.0654	0.467224	2.40227	0.546964	-0.390468	1.46079	4.4683	-2.6522	-1.46975	1.2846	3.75525	-0.224536	-0.389759	0.433877	-0.800714	-0.485933	-0.339571	-2.09098	2.35394	1.11173	1.82724	-1.22777	-0.890413	4.25324	4.91164	-1.72854	0.451947	0.46606	0.676249	-1.5744	-1.09808	-0.304791	2.15203	-2.16752	4.03657	2.15326	0.379663	1.6443	-1.18571	-0.427572	0.427572	-0.709823	-0.74631
1279	XP_025265136.1 lysosomal alpha-mannosidase isoform X1 [Camponotus floridanus]	NA	0.0533941	0.0443792	0.23725	0.514612	0.62308	-0.440176	0.308202	-0.107552	-0.2508	0.204982	-1.90447	-1.52736	-1.37981	0.0741145	0.920526	-0.364641	0.159803	-0.844775	-0.411859	-2.26162	1.26617	-0.0984766	-0.818184	-1.17755	0.791978	-1.74852	-0.79957	1.02923	0.497289	-1.85855	-2.72872	-0.321206	-1.84738	1.10811	-0.669792	0.926127	-2.00508	0.786562	1.27273	-2.47118	1.15555	-1.77035	-0.948525	0.277934	0.277934	0.802567	0.745265
141	E1ZYV6	PKS_ER domain-containing protein	0.0765712	1.93001	0.435597	-1.78239	2.21233	0	-2.25292	-2.62667	-0.394404	-1.92377	-1.75404	0.181061	-0.443425	-0.0143985	-1.03925	1.54604	0.253284	-1.06735	1.66543	-1.39948	-3.49686	-1.45174	-1.09319	-2.05909	0.602546	0.924664	-0.60399	-1.85947	1.91215	-0.6307	-0.848317	-1.05347	0.678676	0.291578	-0.629555	-0.265801	-0.961201	0.0601367	0.285719	0.29033	0.0247236	0.753514	-1.62869	-0.305039	0.305039	-0.770654	-0.744904
569	E2AHI0	60S ribosomal protein L6	2.01807	0.107628	-0.932109	-0.0295741	-0.989468	1.39776	-0.487673	2.11072	-0.911985	-0.593598	-1.19422	0.094998	1.80777	-0.547058	1.95437	0.0330365	1.09308	0.100316	-0.946398	0.586031	-0.567381	0.310323	-0.71649	-2.21896	-1.79913	-3.17969	0.0392	3.00128	-0.438479	-1.29277	0.81296	-0.407339	-0.131785	0.844989	-0.324109	1.09931	-1.94039	-1.74051	1.44063	-0.781443	3.74197	0.15577	-0.127062	0.323068	0.323068	0.754668	0.744315
147	E1ZZ56	Uncharacterized protein C8orf55-like protein	-1.01012	1.22864	-0.57663	-1.04069	1.17481	1.17657	-0.0707656	0.0328653	-0.14821	0.931291	-0.286331	0.676181	1.19348	-1.24476	-0.706401	-0.981989	1.52037	0.453619	-1.61253	-1.73777	0.143627	1.17159	0.287999	0.0385126	1.74701	-0.54436	0.237019	-0.0454422	0.47132	0.693809	-1.98179	-2.42726	-1.02066	0.184489	1.19663	0.507541	-1.43236	-1.29303	-1.27797	0.499902	-0.92292	-2.14329	2.41755	0.279759	0.279759	0.793816	0.741341
217	E2A214	Uncharacterized protein	-1.34921	-1.15928	0.928148	-0.0737738	1.233	-2.88912	0.498101	0.268275	-2.46157	-0.096061	-1.20939	1.54226	3.30669	1.63174	0.69392	0.18264	0.18734	-0.462709	-0.142872	-1.24674	0.514214	0.892705	-1.70479	0.985097	1.10787	1.18956	-2.12924	-1.62646	-0.122458	-0.047198	0.0504298	1.57277	0.623273	0.0678891	0.306677	-0.330416	0.128511	-2.14171	-2.11972	-2.31338	-0.852919	-0.999779	-0.309273	0.308177	0.308177	0.762081	0.740863
194	E2A155	Tetraspanin	0.925291	-0.321713	-3.22457	1.01575	0.893884	1.04664	-0.910919	0.32998	1.28293	-1.52272	-0.993959	-1.89467	1.24473	-0.215348	0.531994	0.442171	1.68435	-1.42947	0.73951	-1.35919	-1.39758	-0.425008	0.205323	0	1.6855	1.1214	2.95713	-2.61541	-0.314761	1.07324	2.61475	0.138329	0.70309	-0.00989676	1.36151	-2.72143	0.00101239	0.387741	0.11735	-1.43166	-0.0635026	-2.39252	0.895279	-0.321123	0.321123	-0.749686	-0.739506
63	E1ZUV4	Twinfilin	1.32494	-2.25407	0.369252	-0.671525	-0.841196	-1.71506	-1.79288	0.856612	0.897341	0.67508	-0.483684	-3.27363	-2.78143	-0.248678	0.214875	-2.34078	0.658093	-0.98661	0.218617	1.95659	-0.791586	-0.887391	-0.622607	0.501426	-0.565235	0.780728	-0.135654	-5.30439	0.797813	-2.52948	0.156823	0.326052	-1.57599	-0.360956	-2.90924	-0.76005	-0.729847	0.845302	-3.96415	0.900716	-1.12658	-3.0129	0.754721	0.351209	0.351209	0.729606	0.738569
531	E2AFK7	UMP-CMP kinase	0.00710809	0.84179	-0.206059	0.215214	0.575551	-1.09708	-1.2694	0.065262	-0.501662	1.65758	-1.33994	-1.21835	-2.3085	-0.772808	-0.333524	-2.38501	0.71776	1.52285	0.542096	0.675387	-0.59926	-1.71401	-2.43737	-2.34972	-0.581426	2.99053	-0.0601023	-1.23117	0.592518	0.184066	-1.1603	-2.465	-0.287154	2.46367	2.9631	-1.49361	-2.28567	-0.18962	0.0195866	-1.28027	2.35997	-0.780555	0.998245	-0.327415	0.327415	-0.738534	-0.734445
805	E2ATF4	Ribosomal_L19e domain-containing protein	1.62142	1.33898	-2.50231	0.393059	1.69255	-0.143306	1.21045	0.582762	0.585225	-0.735422	-1.48066	0.0885742	1.92294	-0.412939	-1.08788	-2.2067	0.329707	-0.34657	-0.356063	-0.150018	-0.0877702	-0.256008	-1.57561	-1.06663	-0.565274	0.340576	-0.329221	-0.778877	2.46416	-0.720207	1.94771	0.162406	-0.0563949	0.104563	-1.44944	-1.82549	-0.808872	0.480594	-2.20093	-0.210998	-0.692712	-1.15702	-0.557162	0.277457	0.277457	0.783422	0.732786
1167	E2B1K0	S5 DRBM domain-containing protein	2.76924	1.27745	-0.616818	3.00285	0.217064	-0.205893	-0.0766566	-0.71098	0.964152	-1.53921	-0.793324	-2.36466	3.2678	-1.4753	-0.0155887	-0.406462	1.38369	-0.396276	0.892746	0.0149473	1.46323	-1.35185	-0.332668	0.559932	1.16816	1.3095	-3.28587	1.91315	1.26433	-4.39145	1.90938	1.13244	-5.39231	0.350317	-3.40083	0.0437403	2.09053	-3.46301	0.873162	3.3894	0.934034	2.17945	-3.70144	0.441846	0.441846	0.691528	0.732769
1074	XP_011257800.2 regucalcin isoform X1 [Camponotus floridanus]	regucalcin	12.7965	12.6424	12.7442	11.5681	11.0606	11.4502	12.2085	13.3628	12.3864	12.7927	12.4618	10.9922	11.7498	13.2541	12.8558	13.391	11.6837	11.9297	11.513	13.1747	12.2917	12.7644	13.6829	11.9994	12.7813	12.6744	11.9119	10.849	13.3495	13.1897	11.9204	13.524	13.1183	13.4958	12.859	12.5858	12.3161	13.1217	9.82188	12.8874	13.409	12.8022	13.6123	-0.230706	0.230706	-0.878561	-0.731797
948	E2B0Z1	Cytochrome b-c1 complex subunit 8	-0.839559	0.0615789	1.79374	-1.41251	1.59652	0.904502	-0.150588	-0.415216	0.412258	0.279118	-1.93533	-1.13197	-1.40003	-0.834568	-1.46947	1.46503	1.62137	0.438327	0.806716	-0.180194	1.79613	0.990219	1.15347	0.796427	1.23855	0.219199	-0.376929	2.83828	-2.78113	0.930677	-0.173078	0.880038	-0.823717	0.151358	-0.480976	-0.956883	-0.124124	3.11398	2.14183	-2.15027	1.78724	3.00895	0.14774	-0.31503	0.31503	-0.743852	-0.73172
1121	E2AU75	Myosin_tail_1 domain-containing protein	4.13951	4.52815	2.47561	5.26977	-1.16558	1.65159	0.52203	0.622314	-4.92208	-0.336445	1.22576	0.291786	5.76346	1.54385	0.259567	2.72177	-0.155116	0.698397	3.30727	3.35449	5.11888	-0.102567	0.761947	3.42461	0.617154	-1.54825	-0.568012	5.32414	2.07098	0.127218	3.20454	-0.101032	-0.0682813	1.03907	0.652553	1.11046	2.65341	1.86269	-0.831673	-3.95604	1.18978	3.85593	2.97094	0.482159	0.482159	0.681806	0.730953
940	E2AZW6	GLOBIN domain-containing protein	1.3117	-1.26145	-1.39113	-0.209846	-1.83414	0.435496	-2.07005	0.681973	-1.99392	-0.0469258	-0.105797	1.78185	-0.458597	0.87373	-0.624608	0.896389	-3.40578	1.11047	1.54313	-1.67356	2.36233	-2.45897	-1.97569	0.779211	0.346109	-0.70664	0.863451	0.8402	0.0910937	-0.914031	1.0348	-0.0879701	-0.214841	1.1106	-1.59359	-0.869985	-1.06734	-1.92002	1.49066	-1.21994	-0.203992	0.552278	0.356734	-0.303486	0.303486	-0.752097	-0.730741
294	E2A641	40S ribosomal protein S24	-2.69485	1.24243	-0.64057	0.516658	1.28394	1.67762	-0.738023	1.66967	1.29195	-0.484129	-1.29897	-2.86955	-0.647608	0.659759	1.17463	0.228319	0.0744485	1.24938	-0.505992	-1.24499	0.81619	-0.225844	0.425821	-1.476	-0.335225	-1.38759	0.0850046	-1.02983	0.194218	-1.13016	2.6102	-1.33046	-1.89274	0.645393	-0.925873	0.69211	0.649443	-0.0968217	-2.11563	0.0161342	1.58123	-0.599893	0.867864	0.290683	0.290683	0.764439	0.73063
60	E1ZUU4	Uncharacterized protein	-0.000818098	-3.00717	-1.52261	-0.806264	-0.310844	-0.296693	0.354738	3.18677	-1.85294	-0.386022	-2.00146	-3.08551	-1.7192	-2.92096	-0.595432	0.481468	1.60815	0.908713	0.0952947	-0.319604	0.950316	1.58727	-2.7613	-2.48556	-1.03773	1.99962	-0.236756	-2.54647	-1.31774	-1.63635	-2.81787	-2.87211	0.394762	0.876439	-0.770144	-0.279898	-0.652765	-1.57969	-2.65499	2.50273	-0.129348	-1.74441	-0.780931	0.348717	0.348717	0.717378	0.727616
739	E2AQK2	FAA_hydrolase domain-containing protein	-0.701933	-1.40787	-1.07952	-0.290458	-2.07475	1.60412	-0.94167	-0.34755	0.861196	2.71608	-2.3474	5.18671	1.12111	-1.50238	-1.23801	0.31755	0.520432	-0.465644	0.817721	-2.63051	-0.0188374	0.949141	0.866295	0.209376	0.477702	0.658667	-0.425439	2.86769	-6.03422	-0.00435559	0.0813841	0.284867	1.9809	-0.694176	1.55465	0.845492	1.91537	-0.382092	4.44234	-0.442616	-1.16015	2.16031	-0.364943	-0.402285	0.402285	-0.695173	-0.726694
914	E2AYS9	Pentatricopeptide repeat-containing protein 2	0.39182	-0.860722	-0.813394	0.818139	1.16116	-1.5238	-1.26581	-1.51833	1.48214	0.309646	-1.20815	-1.21613	-1.20733	-1.46972	-0.435345	1.30865	-0.074545	-0.403043	-0.34154	-0.877935	1.16266	1.39169	-0.554283	-1.77644	-0.266311	-0.00183929	-0.96765	1.22527	-3.56648	0.572885	0.266167	0.275143	-1.69777	-3.45697	0.370188	-0.319501	-0.631443	-1.42054	-0.976736	1.29596	-0.748225	1.64615	-0.465128	0.282418	0.282418	0.75995	0.721463
418	E2ABB8	FERM domain-containing protein	-2.41248	-0.558511	-1.03725	0.060959	-5.2915	-1.16728	0.504669	1.83216	0.647402	-0.336764	-0.534289	0.126288	-3.03529	-1.22747	-4.87577	0.651292	-0.104666	-0.980713	0.678405	0.046629	-6.16601	-1.0203	-1.09165	-0.298229	0.326694	-0.951074	0.188797	-2.73556	0.772429	-0.942955	-3.66631	0.686902	1.06642	-1.25812	-0.112657	-3.26265	0.578819	0.276332	-1.52041	1.054	-2.33585	-2.9222	0.742827	-0.384018	0.384018	-0.691299	-0.718098
152	E1ZZB9	Uncharacterized protein	-4.43911	-1.61144	1.21865	2.20894	-0.35701	0.522518	-2.90304	1.54017	0.202315	-0.376637	0.0467537	-0.117274	-1.51221	-1.71911	1.27022	-2.39528	0.328359	-1.06676	1.92052	-1.21517	-3.58807	1.16079	-2.86738	1.03486	-0.973802	-0.991414	2.13723	-1.4886	-0.0631338	0.394935	0.0419088	0.074362	-2.26909	-0.138917	0.0151902	1.25273	-1.21776	-0.894597	-0.997891	-0.0804733	-0.00159614	0.673578	-1.83404	-0.331468	0.331468	-0.709729	-0.713966
904	E2AYI4	Uncharacterized protein	-1.22912	0.668507	-1.24709	-1.0485	1.53379	-2.47988	-0.990127	-0.922104	-0.617679	0.462612	1.06695	7.35997	1.02868	1.13826	-1.22926	-0.998177	1.14162	-0.850029	-0.35616	-1.17938	-1.3199	1.09463	-1.34045	0.26611	2.37838	-0.779408	-1.9836	-2.55736	1.57937	1.65223	-0.763498	-2.88166	-1.98685	-1.31945	-2.61721	0.593053	0.215094	2.55395	-1.6243	0.868544	-0.599184	0.680664	-1.62319	0.383815	0.383815	0.684114	0.711752
1063	E2AE31	Protein sidekick	-2.60583	-4.19523	-2.48501	-0.313058	-2.81616	-5.4209	-2.11277	1.16237	0.74063	-2.56357	-2.79941	1.57817	-2.43335	-0.178581	-5.67942	-0.354613	-0.831858	-3.6969	-0.960707	-0.97396	0.0408611	-5.02017	1.49823	-1.78739	0.0680746	1.03503	0.378224	-4.12146	0.421036	-0.955582	0.592446	0.871305	-3.1966	-0.363498	-2.04781	-0.881914	-1.73927	-2.24887	-4.8463	-0.764462	-1.28861	-4.40541	-1.69244	-0.408771	0.408771	-0.675007	-0.710228
922	E2AZ52	Uncharacterized protein	0.386317	0.174312	-2.6024	-1.81046	0.882987	2.94621	0.80463	-0.463461	-0.635105	0.836799	-0.548602	-1.88441	0.438989	-0.36853	0.584035	1.93988	-0.481751	-2.92254	0.0414931	-0.0780889	1.77818	-0.0801916	-1.19286	0.169641	1.30695	0.266974	-0.786156	1.26939	-2.2893	-0.381259	-1.39888	0.330335	-1.95205	-2.44072	-1.17783	-0.0853357	-0.740138	0	0.40414	-0.431901	-1.44206	1.24824	0.422676	0.28734	0.28734	0.732523	0.706296
1250	E2AKU5	Palmitoyl-protein thioesterase 1	1.62936	0.342989	-1.08965	0.116995	-3.0801	-1.91639	-0.878272	-0.645365	0.0904879	0.673449	-2.61005	3.0845	0.424816	0.22395	0.550558	0.192861	-1.72253	0.304689	-2.53555	1.93815	0.520049	-1.08919	-1.46984	0.303474	0.320104	0.489788	2.18571	-0.192054	-0.122522	-2.33012	0.222188	-1.13831	-0.210123	0.045955	-0.584434	0.806741	-0.476794	-0.846871	0.524134	1.18166	0.0558095	-1.23166	0.717244	-0.287912	0.287912	-0.730302	-0.705129
1314	XP_025268322.1 UDP-glucuronosyltransferase 2B1 [Camponotus floridanus]	NA	0.112609	1.63949	0.0538661	-1.83135	1.9844	-1.10552	-0.406375	0.835282	-3.1802	-0.500669	-0.981676	-2.07733	-1.82252	-0.594985	1.65221	1.56858	0.547041	-1.28464	0.699119	0.626071	0.601818	0.774795	2.32761	0.281925	0.953599	-0.806103	0.575726	-0.92626	-0.666443	2.0932	-2.86917	0.497881	-2.00481	-0.385483	-0.881153	-1.32529	-0.355161	1.16605	0.137251	-0.109582	-0.835993	0.456961	-1.11557	0.290166	0.290166	0.724132	0.702262
1097	E1ZXN9	PABS domain-containing protein	-0.652478	-1.03767	-0.999737	-0.845184	2.03438	0.983206	1.35277	-0.414569	-0.0731731	1.11604	0.634925	5.17594	-3.61061	1.37743	0.125129	-2.99532	-0.956859	0.390488	1.18954	0.24414	-0.701071	-0.456221	0.801313	-2.25806	-1.82499	2.29894	-0.507881	0.760424	0.719591	-0.346903	-0.547625	0.0428943	0.717689	1.45117	0.690736	-0.343725	-1.11628	0.144795	-0.866606	1.66353	-0.775417	-2.49488	-1.62508	0.327511	0.327511	0.691702	0.697836
1114	E2ASN5	PKcGMP_CC domain-containing protein	2.61862	0.400751	0.480061	-1.01246	-1.37226	0.25402	0.749635	2.23585	-1.38048	1.06879	0.215835	-2.30718	-1.72343	-0.0891725	-0.296933	0.0635729	-0.521018	-0.343342	-2.32932	-1.76118	1.05209	1.87776	-0.540909	-1.63192	0.0183611	1.40932	1.8201	-1.78652	0.0306931	0.808129	-0.767676	0.377188	0.577174	-1.45755	-0.335079	0.504625	-2.59271	1.00259	-2.52633	0.747773	-0.0820459	-3.71372	-0.807556	0.304576	0.304576	0.705461	0.697207
1283	XP_025265324.	NA	0.510403	1.15458	-1.0096	-2.14436	2.48153	-0.494965	0.356731	1.884	-1.54006	-0.832203	0.881672	1.76573	2.8182	0.646224	-1.32492	-2.49264	0.571339	-0.49695	1.43242	1.27139	0.151281	-2.51423	-1.29224	-1.28753	-1.38084	-2.27963	1.36646	-0.0724718	0.553749	0.345625	-2.12785	0.385819	-0.645045	-0.584294	1.92597	2.21866	0.256163	-1.02033	-1.98499	-4.51069	3.53336	1.1689	-1.33227	0.351097	0.351097	0.678786	0.696614
327	E2A7L2	Dehydrogenase/reductase SDR family member 4	0.399549	0.539939	-1.35674	-0.796978	4.90115	-0.434238	-1.12353	-0.476193	-0.911777	0.721161	0.0659229	-1.79991	1.1036	0.194812	0.13243	-0.605945	0.897529	0.608973	-2.02723	-0.847302	-0.93538	0.0489364	0.338309	-2.26528	0.972	0.698566	-0.0430063	-1.39159	1.28398	-0.736792	-1.27799	0.205985	-0.685752	-0.259279	-1.37456	1.32991	0.450319	1.207	-0.159645	0.356444	-3.33579	-0.800418	-1.12363	0.28822	0.28822	0.717521	0.696305
785	E2ASI9	Endonuclease_NS domain-containing protein	1.40176	-0.0140761	-2.09312	-2.07967	-0.84066	0.610588	2.32274	1.46797	0.487497	0.0635578	-2.13815	0.29686	-0.942513	1.68255	0.872881	1.07275	-0.616975	-0.423909	0.805569	-2.33718	-0.190362	-1.08582	0.737013	-1.70267	-1.26047	1.65504	-4.02626	3.3739	0.386605	-0.993277	-0.100066	-0.0203654	1.81463	-1.23097	-0.0660552	-1.83413	0.43695	-0.218129	-0.88335	-0.750334	-0.988087	-1.0205	0.475999	0.306678	0.306678	0.701696	0.695501
541	E2AFW1	Amino acid transporter	-1.20187	-1.04344	-1.36083	0.0163766	1.50226	-0.143443	-0.394263	2.37982	-1.80098	-1.28692	0.0619904	-1.39701	0.686556	0.0267612	-0.0438354	0.812289	0.840685	-0.29919	-2.15692	-0.391308	-1.94439	1.41262	-2.46987	2.51692	-2.02919	1.43108	-1.79533	-1.01163	-0.852326	-0.857273	0.435338	1.48935	-1.04227	0.0467245	-1.77621	-0.59761	-0.197022	-1.13766	-3.1481	-1.51173	-0.716922	-0.814172	-1.23605	0.283903	0.283903	0.719538	0.694893
128	E1ZY09	Receptor expression-enhancing protein	1.13035	0.514477	-0.43873	1.1361	-1.43085	0.511947	0.0593543	-1.40785	-2.37945	0.446812	0.230111	-1.12809	2.64037	0.870307	0.0654765	-1.44528	0.616179	0.916264	-2.36459	-1.33035	-0.6908	0.385073	0.00443143	0.0126953	2.05612	-1.44665	-1.73282	4.11189	-2.32799	-0.81426	3.91012	-0.116944	0.670841	-1.11108	-0.989475	-1.07896	-1.9888	0.43083	2.81569	-2.29964	1.25236	0.678066	2.03344	-0.337564	0.337564	-0.682615	-0.694693
957	E2B1A7	40S ribosomal protein S28	-1.5702	-0.962114	1.22609	-0.0697109	-0.238216	-0.552044	-0.400486	2.01913	-1.47057	1.9207	-1.22112	-0.759552	-2.00455	-0.445775	-0.361099	-0.599937	1.35432	-1.09688	0.577559	-0.0429585	1.02288	0.294102	-1.00076	0.242809	1.71487	-0.781281	-1.55138	-0.670031	-1.65972	-1.47894	-0.0932941	0.318917	-0.569095	0.623526	-1.4266	0.761014	-0.1076	1.14807	-0.711594	-1.57205	-0.851933	-3.23488	0.869076	0.26102	0.26102	0.745152	0.694535
799	E2AT08	Ras-related protein Rab-10	-1.60308	-1.60883	0.779968	1.29771	-0.367936	-0.329577	-0.769945	0.380526	-1.15787	1.07034	0.559072	-0.369163	-1.85459	-0.407754	0.529969	1.46746	-2.32951	-9.49e-06	0.439315	0.175823	-0.729403	-1.76592	-0.817674	0.426557	0.153887	2.8605	-0.53393	-2.82816	1.56244	-0.0874987	-0.45348	0.482421	-1.15331	0.470527	1.85453	1.53992	1.53753	0.458306	-1.88019	-3.64578	0.00935418	-2.39553	1.14282	-0.298267	0.298267	-0.705729	-0.693864
1138	XP_011265256.3 GATA zinc finger domain-containing protein 16 [Camponotus floridanus]	NA	2.89955	5.71216	4.85578	5.88257	3.43498	3.28118	4.25915	2.16803	4.43994	2.9209	1.2608	-0.723618	-0.2474	1.85502	4.43833	2.85398	0.820819	1.99182	-1.08709	2.82183	2.92473	2.33279	3.98265	2.83485	2.85134	1.3156	3.48694	0.672773	5.58605	3.81669	3.79911	3.96943	4.05841	3.21277	4.72406	2.63167	3.62177	3.69452	-2.36831	3.86556	3.29814	1.6035	5.65359	-0.373861	0.373861	-0.666589	-0.693484
305	E2A6N1	Tropomyosin-1	6.43665	6.53582	3.5905	6.73745	4.31262	0.271514	4.25726	1.02568	-0.581321	0.688784	3.54173	3.25279	7.81109	2.85131	0.811922	3.7653	0.636192	4.09889	3.7447	3.54906	5.17678	1.6202	3.92002	6.21204	2.53397	0.468656	1.76926	5.46344	4.03373	2.52405	3.6722	1.18055	5.62405	1.87938	5.43688	2.65589	6.32965	6.3266	2.63429	1.79808	3.23049	7.00512	5.62977	-0.426713	0.426713	-0.650079	-0.691132
540	E2AFW0	Aldedh domain-containing protein	0.146608	0.251496	0.787531	-2.46968	3.17365	0.0808348	-0.501206	1.14332	1.50885	0.907667	1.71285	2.31233	0.345885	2.47785	0.0199969	-2.04337	-0.879253	3.19125	-2.8775	0.472304	-2.7963	1.96706	0.187352	2.39767	1.09523	-1.77243	-0.155111	-0.551274	0.893057	0.634295	-3.15887	0.183237	-0.851965	-0.314768	0.131302	-1.03175	-0.821385	1.46556	0.707341	0.430129	3.31045	0	-1.34289	0.33411	0.33411	0.674702	0.686822
1037	E2A8F6	NA	-1.10006	-1.30552	-0.72377	1.90598	-4.72744	-0.498967	3.39869	0.394484	-0.179629	-0.832276	-2.72105	0.386022	-1.54555	0.607158	0.48773	1.40698	-1.61005	0.616145	-0.429355	-2.09085	-1.57085	0.268651	0.712352	-0.0749136	-1.37353	0.155765	0.679076	0.0866283	-0.725659	1.90718	-0.449433	0.022107	1.37954	-0.163419	-0.159135	-0.578762	-0.206726	0.903512	-4.43553	0.211694	0.308002	0.569372	0.252554	-0.313293	0.313293	-0.685845	-0.686649
1323	XP_025269112.1 titin isoform X4	NA	0.759547	0.0382711	-3.8443	0.901192	-2.99539	-6.37648	-3.82382	-7.14863	-3.1767	-4.6313	-1.31786	-1.44901	2.98778	-1.45193	-3.94647	-2.74138	-5.91819	-1.35466	-2.40593	-1.02554	-1.36691	-3.54538	-4.14197	-1.10087	-3.45387	-7.69219	-4.81005	-0.560091	-3.41834	-4.78627	-1.64223	-4.88853	-2.1172	-4.02566	-0.180193	-2.49055	-0.403272	-2.46144	-5.85769	-7.25603	-1.0699	0.387466	-1.90002	0.465692	0.465692	0.637866	0.686073
681	E2AMG9	Sodium-and chloride-dependent glycine transporter 2	0.899175	1.41146	-0.154386	1.24356	-0.189611	-2.57619	-0.642047	-0.145145	0.362286	-1.46612	0.4729	-0.152573	-0.470963	-1.54911	1.08623	-0.137873	0.135802	-0.494521	-0.0814328	-0.494729	-0.93696	1.06027	0.34776	-0.497936	-0.523785	-1.06491	0.301758	-1.83009	-0.014569	-1.74514	-0.800304	-0.397563	1.9488	-0.360759	0.619014	-1.3936	-1.79107	-0.408143	0.106686	-1.47564	1.94054	0.70337	-0.247075	0.239033	0.239033	0.764533	0.684881
784	E2ASG6	Fumarylacetoacetase	0.982629	-1.05295	-1.12623	0.0620492	-1.212	-0.00506548	1.54545	0.448171	-0.564553	-2.53197	-0.426099	4.82485	-1.94021	0.894183	-0.149313	0.765254	0.0503929	-2.03949	0.686572	-0.217053	1.65216	-1.50199	0.436179	-0.977554	-1.94586	-0.687483	-1.30046	3.39293	0.513953	-0.345764	-1.0547	-0.99921	-0.928156	-1.17504	2.64526	0.566626	1.03486	-1.21262	2.63462	0.945516	-0.351265	2.96269	2.55916	-0.332093	0.332093	-0.672537	-0.684242
264	E2A4L0	Uncharacterized protein	-2.44629	3.21308	-1.55653	-2.29924	-2.08603	-0.453249	-0.124429	-0.128994	0.328154	0.3404	0.618548	-0.268789	-0.92843	-0.62354	0.217064	2.85264	-1.12693	0.544893	0.140069	-0.368475	0.189491	-1.25746	4.07177	-0.117984	-0.913673	-0.674053	0.259171	-2.5885	-0.757115	-2.12301	1.12874	1.60844	0.330622	-0.759621	1.88872	0.0940537	0.164571	0.121136	4.74583	1.03317	1.49546	0.360736	0.274712	-0.328669	0.328669	-0.673737	-0.683834
1307	E2AWE3	Basement membrane-specific heparan sulfate proteoglycan core protein	0.558201	-0.838798	2.66899	-2.63448	-0.961634	-0.376072	-1.53944	0.117701	0.653488	-0.56757	0.945854	1.44243	-4.77969	-0.798505	-0.830676	-0.780123	-1.1087	-2.0384	1.19902	0.657305	-1.73315	-1.9628	-1.04951	3.22134	-0.546049	-0.873922	-0.181767	-4.65248	-0.795311	-0.228057	0.574663	0.306252	-0.828369	0.421393	0.179394	0.409618	-0.744991	0.556442	-4.01595	1.73015	-1.33627	0.0251863	1.58392	-0.338371	0.338371	-0.66889	-0.683668
809	E2ATW3	Glutamine synthetase	1.5123	0.787798	0.75029	2.56173	2.00093	-0.454578	1.684	1.81867	2.83767	-0.959818	-1.58363	-1.96895	0.653369	-0.193833	0.421749	-1.92842	1.57745	-0.354315	0.367046	0.109009	4.10769	-0.287452	-0.635408	-1.54804	0.144578	-0.269481	-1.73518	2.95261	-2.1712	-0.854541	1.6292	-0.459187	0.816466	1.25789	-0.323499	-0.139564	-0.688792	0.963243	2.60097	-1.41216	-0.575056	3.65051	0.817722	0.324711	0.324711	0.67539	0.683517
1075	E2AH16	Uncharacterized protein	1.46353	0.947873	-1.09452	0.418362	-0.621713	-0.213663	0.793569	-1.26847	-0.987965	1.48438	3.51776	8.78416	3.98145	-0.172684	2.34045	-0.799194	-2.26597	0.586427	-0.777207	0.486679	1.30909	-2.67857	-2.11403	0.200368	-0.872238	-2.0458	2.48607	1.98938	0.94058	-2.55763	3.17246	-0.77987	-0.721487	-1.1336	0.130655	-0.539989	3.67623	-1.3837	-0.259227	-1.715	0.825901	2.30306	-0.841812	0.426706	0.426706	0.641521	0.683104
463	E2ACY3	SHSP domain-containing protein	-2.60856	1.01166	-0.240643	0.161463	-1.05141	-0.575833	0.208061	-0.266816	0.561511	2.75739	0.140543	-2.59402	0.755229	0.0787272	0.990719	-1.76138	0.657123	-0.700173	0.602689	-1.01407	-1.63438	-0.286001	-1.3011	0.917503	-1.87036	1.62786	-1.5414	1.02789	-0.943936	-0.78566	-0.181494	-1.90633	-1.2297	-1.24219	-1.68686	0.470194	1.78146	0.214165	-0.908073	-2.1557	-0.147075	-0.715409	-1.4021	0.268241	0.268241	0.718467	0.683021
679	E2AME3	Alpha-carbonic anhydrase domain-containing protein	1.48617	-0.0669452	2.0038	-0.468794	1.50219	1.01636	-1.40851	1.09129	-1.81544	0.576769	3.92263	7.11037	6.16068	1.58462	1.74939	-0.100209	0.517675	1.18903	0.501323	1.519	-0.481308	-0.322133	-1.29221	-0.903067	1.98029	-0.0881574	-0.335286	1.60093	2.20488	-0.715193	3.57889	1.81632	0.389135	-2.49392	1.19174	-2.95983	3.68348	0.748315	1.66722	0.417285	-1.58337	3.97725	0.291758	0.405946	0.405946	0.645611	0.682717
879	E2AX77	Probable chitinase 1	-2.53975	-0.968936	-1.17332	-2.68566	-1.41896	1.16507	-0.422737	-1.13563	-2.85748	1.02813	5.32938	7.55206	3.40264	-1.53407	-1.08429	-0.365749	-2.66208	-0.513693	-5.77611	3.58125	-2.9318	-2.7239	1.82448	-0.659588	-0.105408	-0.816066	-1.30451	2.21085	-0.227773	0.447718	-1.68643	0.130716	1.26145	0.360452	-0.110088	0.414855	2.14845	0.0720273	1.07326	0.40686	-0.335148	-0.467002	0.18407	-0.45042	0.45042	-0.635839	-0.681795
1151	XP_011266509.1 chymotrypsin inhibitor-like [Camponotus floridanus]	NA	-3.00343	-2.5227	0.43114	0.510017	0.849236	-0.740502	0.0837007	-0.724929	0.133816	0.4008	0.168394	4.64233	3.16273	0.608141	1.968	0.628055	-1.14721	-0.191745	1.69828	-1.85569	0.807193	0.771462	1.3816	0.042742	-0.0615881	0.282354	0.631273	1.60318	3.58969	-0.781464	1.373	0.419011	-1.80343	1.34246	1.04099	-1.38612	-1.37762	0.430095	1.00554	-2.10624	-0.074513	-2.47506	-1.21154	0.32624	0.32624	0.670514	0.68021
1188	E2A1T1	Fucosidase_C domain-containing protein	-0.814714	1.48866	0.0123988	-3.14383	-1.40547	0.572949	-1.54101	-0.629658	1.09323	0.403505	4.11102	4.70711	4.6951	-0.111546	-2.63615	0.370329	-0.430505	-0.986901	-2.1542	1.93203	1.3207	-0.29212	-2.83604	-1.30035	-1.14825	-1.33037	-0.742616	4.83912	-1.0778	-0.114195	1.5611	-0.753609	-0.0711885	-1.48156	1.64963	0.403723	3.58585	-0.351832	6.1109	0.0784438	-1.5856	5.07274	-1.17863	-0.446323	0.446323	-0.634861	-0.680201
1157	XP_011267177.1 uncharacterized protein LOC105257931 [Camponotus floridanus]	NA	-0.237351	-1.65166	-0.284722	0.763053	0.319225	0.813518	-0.287329	-0.343332	-0.125262	-2.43856	0.580556	-2.93817	-2.0363	-1.35993	-1.76049	-0.128322	-0.236822	1.84945	1.0451	1.50989	-1.17617	1.28865	-2.9265	-1.41354	0.127544	-1.32123	-0.53737	-2.87703	-0.315737	1.85094	-0.709827	-2.44836	-1.76286	-0.672097	0.0234855	-0.807844	2.22379	-1.04921	-2.38929	1.87425	-0.968834	-1.27586	-1.94347	0.295216	0.295216	0.688726	0.679488
257	E2A4D2	NA	-0.0918954	-0.429522	-0.307571	-1.33985	-0.907163	-0.247938	1.1187	2.09506	0.695756	-1.79985	0.90649	0.626857	-0.127089	-2.21489	-0.135456	-1.14305	-1.23111	2.5845	-0.425969	-0.823627	-1.9135	2.07004	0.823159	-2.051	0.0404219	0.223087	-1.69082	-1.90197	1.36651	0.298545	-2.19526	0.943126	-0.66308	0.228735	-0.375677	0.681254	-0.411518	1.22839	-3.72686	1.32804	2.70127	-4.31029	0.0312976	0.316359	0.316359	0.674263	0.678949
854	E2AW15	Pseudohemocyanin-1	0.919432	-2.71061	-1.64413	-0.391089	-0.638768	1.40675	-0.0653656	1.77477	-1.10642	-1.45731	-0.32931	-0.334581	-3.27885	-0.615647	-1.06441	-1.61639	-1.5847	1.83167	-0.179053	0.529595	-0.300527	-2.49943	0.186231	-1.42577	-1.45522	2.95798	0.749248	-3.37524	0.710386	-0.846569	-3.259	-0.891516	2.6631	-1.11341	1.10203	0.42105	-0.751631	-0.413076	2.4726	-1.14163	-1.33556	0.584584	-0.770911	-0.3166	0.3166	-0.673843	-0.678724
1019	E2A4E0	G protein gamma domain-containing protein	-0.0722407	-2.91345	0.322424	-1.01454	0.0208977	2.23525	1.39654	2.8711	-1.5119	-0.352155	-0.294635	-2.65744	-0.43836	-0.367743	0.970737	1.37051	0.214649	2.5303	-0.611646	0.932397	1.28203	-0.828576	1.81857	0.0997845	1.22955	-1.9051	-2.00568	-3.02418	0.933544	-0.98485	-1.8466	1.86456	2.22903	1.70696	1.53118	-0.998575	-2.22606	-0.0238815	1.43364	1.64452	-0.18781	-1.61537	-0.0089304	0.320876	0.320876	0.671309	0.678583
177	E2A0E6	SVWC domain-containing protein	-1.32632	-0.465643	0.210617	-0.557492	-1.3503	-0.688322	0.670747	-0.12199	0.341256	-1.59359	0.712235	2.5871	-1.61413	0.100239	-2.67622	-0.563071	-0.0325356	-0.945762	1.1084	0.390577	-1.40576	0.752937	-0.449157	-0.129782	-2.13854	-0.168359	-1.09117	-2.94257	-0.534738	-1.29855	-0.131498	-1.78794	2.22587	-0.177578	-1.47884	0.757267	-0.551653	1.03412	-5.14218	2.03328	-1.20119	-0.15493	0.973825	0.294554	0.294554	0.678488	0.671434
1026	E2A692	NA	-0.878381	-1.20493	-0.398664	1.87419	0.680279	0.0412348	0.140867	-1.50561	-0.00736907	-1.26235	-0.453803	-0.727314	-1.16911	2.15596	0.842979	0.0618357	1.52485	0.113461	1.08553	-0.118177	-0.821604	0.245079	-1.0808	0.00593443	-1.12103	-2.06699	0.621727	-1.61081	0.737712	1.70447	2.62958	0.975824	-1.81611	-1.12485	-1.4223	0.455272	-1.15801	-0.234187	-3.23486	-0.305046	0.00983914	-1.04013	1.87542	0.268456	0.268456	0.700558	0.671059
1225	XP_025262524.1 cytochrome P450 4C1-like isoform X1 [Campon	NA	-1.10948	-1.32618	0.906689	1.36583	1.61102	0.92657	-1.32375	-1.0882	-0.705602	0.00942544	-0.676114	-1.21525	-0.689741	-0.108209	1.9621	-0.521166	-1.76192	-1.58222	0.29877	-0.200959	0.771485	0.889007	0.648697	0.219817	0.440055	-1.0935	0.909693	-0.0921146	-0.674907	-1.66723	0.364663	-0.809826	1.52262	0.313493	0.778751	-1.13696	-0.596249	-1.31086	-1.85151	-0.728747	-0.0746058	-2.05007	0.276161	0.236144	0.236144	0.740732	0.668364
513	E2AEF8	Coatomer subunit beta	-3.05255	-1.18931	0.500829	-0.345852	-1.6583	0.116849	0.516288	1.85829	-1.50898	1.55621	-2.66809	-3.00655	-1.60826	0.0265413	-0.154103	0.35376	0.319453	2.67708	0.277516	0.106482	2.64102	2.71406	-1.3753	-0.957845	0.0296385	-0.341195	1.27889	-3.58347	2.57397	-0.190936	-0.337994	1.59265	-2.18795	-0.269311	-1.11759	0.826088	0.0518567	0.268119	-3.08928	0.692351	-1.82661	-1.5384	-0.915554	0.325915	0.325915	0.655072	0.667443
214	E2A1U5	DAO domain-containing protein	-0.882579	-0.369925	1.20268	-0.267167	1.60264	-1.43493	0.71664	-0.333155	-0.48782	1.06715	0.634875	-3.71206	-0.325549	-0.489292	0.617672	0.723812	-0.526212	0.063994	0.560885	-1.24062	-1.21064	-1.03479	-0.298011	-1.65596	1.03273	0.388844	-0.368576	0.000836776	-1.26324	2.2991	-0.133076	-1.56152	-1.47239	-2.0578	-1.02832	2.2133	0.662942	-0.481179	1.32701	1.07276	1.97208	-0.304436	-0.122975	-0.261763	0.261763	-0.699984	-0.665768
1285	XP_011259721.1 serine protease inhibitor dipetalogastin-like [Camponotus floridanus]	NA	-0.59091	0.502964	-0.979438	-2.82623	-0.289471	-1.95342	1.0534	0.283545	0.214534	-1.54584	-1.09273	2.28853	-2.64569	0.69734	1.07929	0.0435376	1.41092	0.467538	0.455894	0.0184623	-1.51964	-2.006	0.290002	-3.13553	1.55639	-0.73446	0.679649	-0.0472273	-0.44768	-0.295584	1.94098	-1.27599	-1.15856	-0.665773	-1.76566	0.30677	-1.78885	0.0776645	-1.17789	-0.998833	-0.940226	-1.08707	-0.146675	0.266383	0.266383	0.69451	0.66544
863	E2AWL2	Aldedh domain-containing protein	-0.354194	-0.508564	1.73768	-1.21694	1.80833	-1.37291	2.3639	-0.268645	-0.151855	-1.38795	-0.551024	-0.538913	0.115729	1.24454	-0.627089	-0.130488	2.25582	-0.919006	-0.256054	-1.10343	0.136982	1.0702	-1.49501	0.908579	2.18796	0.0326465	-0.659029	-0.472447	-1.93784	0.118018	-0.201783	-1.18719	1.14018	-0.102056	-2.58319	-0.403082	-3.04935	0.905845	0.330447	0.921727	-1.0953	-0.278538	0.0685776	0.261318	0.261318	0.698471	0.664419
125	E1ZXZ4	Hexamerin	0.323705	-0.365363	-0.717614	0.517586	-0.453977	0.94543	1.5904	-0.123494	-2.86658	-0.36085	-0.127116	6.41762	-0.479168	0.253664	2.73858	-0.992372	0.825874	-0.893663	-0.89648	-1.61077	-0.119726	-0.454116	-0.0697105	0.384239	2.31295	1.01549	0.258322	-2.43317	0.96749	-2.2802	-0.922999	-1.45789	1.52749	-0.481513	-1.34833	-0.812464	-1.9432	-0.943673	1.73855	0.802571	1.45458	-1.09259	-0.477251	0.320573	0.320573	0.653543	0.664055
1189	E1ZVF6	PRA1 family protein	-1.61021	-1.12483	-2.29471	-1.82979	-1.50942	-1.33836	-0.0919151	1.42781	-2.044	0.135033	1.45546	-1.68451	-1.03294	-1.36515	-0.247031	-0.419967	1.41366	-0.955032	1.34442	0.355722	-0.706923	0.61612	0.3876	0.465666	-1.66408	2.35672	-1.31625	0.325783	1.29449	0.303138	-1.51542	-0.159005	-0.650343	0.356764	-1.40315	-2.2365	0.732498	1.53297	0.445319	-1.71388	-2.08395	-0.5428	1.11267	-0.265466	0.265466	-0.693091	-0.663815
915	E2AYU1	TGc domain-containing protein	-0.447948	-1.83109	2.56889	-1.52415	-0.159348	-0.905524	1.62771	-0.81697	-3.62187	-1.13588	-1.16474	4.03238	0.397955	-1.66961	-1.06061	-0.741287	1.51994	-4.47046	1.20385	-1.06798	-4.03321	-1.56907	-0.496815	-0.411132	-1.71508	-0.359712	0.996122	-1.24861	-0.804489	1.62027	-2.39555	0.0982194	-1.94081	-0.0618035	-0.199256	1.50713	0.853459	-1.30328	-2.31614	0.872722	0.737352	-2.97548	2.68357	-0.349954	0.349954	-0.640588	-0.663623
1275	XP_025264613.1 lysosomal aspartic protease isoform X3 [Camponotus floridanus]	NA	7.45647	7.46967	6.61292	8.60802	6.37226	8.68544	7.72795	7.82633	7.20534	6.59305	6.6928	5.89004	9.92603	8.77429	7.23672	7.91523	6.53233	7.54657	5.60707	7.59659	7.04484	9.36801	8.30149	9.50482	8.10448	8.84822	5.4371	5.33639	8.78216	8.54277	8.74064	9.39343	6.67702	8.55842	7.68575	7.36374	7.41473	7.28321	4.18306	7.79652	9.08262	7.94689	9.07182	-0.266409	0.266409	-0.691366	-0.663301
754	E2ARD3	L-xylulose reductase	0.345979	-0.432197	-0.596726	-1.92436	-3.44399	0.597296	-2.31221	0.457774	1.78163	-0.559872	2.68497	7.8067	0.198669	-0.125149	1.48557	-1.62968	-1.43151	1.65197	0.477795	-1.26128	-0.277205	0.290754	-3.28727	0.444885	0.441362	-0.960052	-1.5303	1.39005	-1.46907	1.25212	1.21652	1.36951	1.29066	1.54958	0.473735	0.601976	-0.557732	-0.631008	3.1386	-0.20179	-0.536405	2.39642	-1.87591	-0.36852	0.36852	-0.628734	-0.658484
151	E1ZZB6	40S ribosomal protein S15a	3.28108	2.62738	-0.905052	2.87946	1.60763	-0.277356	0.0606229	0.121285	2.42855	-0.122339	0.238948	2.66163	4.59027	-1.55952	1.50336	1.1668	-0.0142904	0.96151	-1.3968	2.97463	3.01942	-2.60127	0.185861	2.23883	-0.320377	-2.0488	-2.42427	3.00203	1.75912	0.413621	1.80744	-1.24808	-0.333756	-1.06496	-0.558656	0.855493	2.28382	1.67651	1.31257	1.17428	1.97453	3.87223	-0.912638	0.345827	0.345827	0.635742	0.658139
737	E2AQI6	Glucosamine--fructose-6-phosphate aminotransferase [isomerizing] 2	7.52564	5.14425	1.88635	3.12062	4.80158	-1.45791	0.23239	-3.82472	3.14375	0.154288	-3.44719	2.0707	7.05953	-1.67334	-1.86148	-1.34006	-0.988667	4.94049	-1.56926	5.648	3.31395	0.493699	-2.43872	-0.0347252	-0.606038	-0.575612	-1.54748	6.13977	5.7654	-0.569213	4.47036	-0.0565255	4.93677	1.49267	4.90659	5.03538	5.25795	1.96696	-4.72136	-2.00164	-1.76249	7.02047	4.20699	-0.621261	0.621261	-0.59604	-0.657921
1089	E2ALF0	Ribosomal protein L15	1.81831	3.10784	0.949475	4.37677	1.43999	-0.0873284	-2.23321	-0.577066	-1.54569	-2.301	-2.47116	1.96614	2.8775	-0.851819	1.54212	-2.02399	-2.92976	0.668371	-0.0702809	-0.815738	2.81175	-3.51157	2.22991	0.428367	-3.01083	0.470409	1.2564	3.68842	-0.382638	-1.10194	3.64793	1.58081	-1.88571	-1.16515	-2.74911	-1.62632	1.2741	-3.41355	1.57179	-0.369853	-1.53817	1.69789	-2.72288	0.407483	0.407483	0.615597	0.655125
253	E2A435	Phospholipid-transporting ATPase	-2.08019	-1.0436	-0.609412	-0.687978	-0.423112	-0.274188	0.649587	-0.197409	0.276507	-1.8523	-0.829562	-0.114394	-0.746542	-0.940136	0.27591	-0.417002	-0.66083	0.688875	-0.167872	0.0500193	0.458742	-0.267949	0.0532508	0.959885	0.71453	-0.0095605	-0.592503	-3.80256	-1.41324	0.212679	0.413569	-0.14929	1.12652	0.214401	-1.72238	-0.787863	-1.55553	1.23215	-1.6865	-1.8802	-1.21802	-0.937577	-1.33325	0.225538	0.225538	0.737058	0.654889
1355	XP_025269804.1 serine protease inhibitor 3/4 isoform X8 [Camponotus floridanus]	NA	-3.49135	-1.78596	0.574949	-0.173987	0.822013	-0.571304	-0.852566	-1.07211	-2.02531	1.66608	1.06629	1.11163	-1.58403	1.48989	1.27917	-1.43053	-1.95264	-1.37641	0.499949	-0.564968	-1.01721	0.66391	0.235242	-0.416384	-1.56851	0.186264	0.787488	-0.827313	-1.11924	1.64975	0.127031	-1.14415	2.02133	-0.0249803	-0.393877	-0.767035	-0.304705	1.97409	-2.31263	0.37287	-2.19753	1.43388	0.544494	-0.270141	0.270141	-0.668981	-0.650108
683	E2AMK0	LAM_G_DOMAIN domain-containing protein	-0.699816	-3.43414	-0.107128	-0.358576	-0.90816	0.00119377	-1.43772	-1.47145	-1.97659	-0.47033	-1.41801	3.84587	0.119925	-1.2105	0.914688	-0.191727	-2.81771	1.64494	-3.10932	-0.324942	-0.942137	-0.455592	-1.88709	-2.11899	1.86985	-2.45754	2.13117	-3.15445	-0.55547	0.150765	-3.56752	0.751752	-0.573899	0.311058	-0.383017	-3.62803	-0.245028	-2.57653	-1.22755	-0.95361	0.0273374	-3.58139	-1.12662	0.319547	0.319547	0.635334	0.648669
559	E2AGQ1	Plug_translocon domain-containing protein	4.82531	4.96576	2.74081	3.61493	0.922544	0.78643	-0.00119847	0.322355	-0.717317	1.59817	1.91939	0.300037	4.26928	1.64581	0.700029	2.78285	-1.51419	3.85572	-0.810898	3.53518	4.53451	0.279343	3.17132	3.33049	-0.893935	-0.243581	1.09758	4.1794	2.01717	-1.90863	3.63201	1.03445	1.1896	0.483564	0.433074	0.114319	2.55921	3.14973	0.383063	0.323591	2.85025	4.42948	2.78997	0.353597	0.353597	0.619726	0.646448
840	E2AVJ2	Charged multivesicular body protein 5	-0.006535	-1.47184	-0.463524	1.23123	-1.21392	-0.376926	-0.52631	-1.46516	-0.552596	1.4174	1.52345	-2.95174	-2.90656	-1.19988	-1.93169	-1.3258	-0.0173246	-0.150916	2.16226	-3.07991	-1.26927	-1.95099	0.825555	0.187146	-1.37695	0.273799	-0.125688	-2.15044	1.4036	0.205469	-2.33979	-0.56901	2.59676	1.81116	1.69576	0.312298	-2.32809	-1.97234	-0.792097	-1.29506	-2.34287	-2.00546	1.08353	-0.296239	0.296239	-0.643359	-0.645235
596	E2AIX4	Maltase 1	0.977681	-1.50709	1.00623	-5.0872	-0.0583145	-0.317689	0.242583	-0.245235	-2.37376	-0.00277827	-0.136581	-2.03922	2.08378	-1.08442	-0.0732035	-1.47493	0.827553	-0.547633	0.387332	0.617746	-0.197416	-1.40163	0.664935	-0.715443	-1.87066	0.242862	-0.870357	-2.59269	1.12618	-0.174557	-2.67219	0.561471	1.14953	-0.948293	-1.37964	1.81806	-0.505086	0.613321	-2.01781	-0.330118	-2.35861	-3.02199	-0.224686	0.28509	0.28509	0.647824	0.643139
129	E1ZY18	Glucose-6-phosphate 1-dehydrogenase	-0.628844	-2.87517	-2.08897	-3.61747	-0.756388	-1.59863	-2.91949	1.29481	0.984557	-0.44841	0.551204	-0.775613	-2.86347	3.14197	-0.968567	0.822117	0.240522	0.871996	0.34573	-1.93886	-1.19023	0.423292	-0.314666	-0.462612	-0.717678	0.995791	-0.675891	-4.07581	-0.82044	-0.019005	-0.778881	-1.24257	-1.36109	-0.501993	-0.540843	0.256108	-0.0335663	-0.550036	0.609632	2.84018	1.39309	-0.365464	-0.528362	-0.293139	0.293139	-0.641106	-0.641993
1203	XP_025262479.1 uncharacteriz	NA	0.290501	-1.48327	-0.337975	0.00217541	-0.707238	0.894545	-0.654348	2.12384	-1.73912	2.9876	0.798542	-0.320731	0.644029	0.135802	1.64245	-2.57312	-0.675304	-0.929826	1.29724	-0.132185	1.33836	-1.88726	-0.941255	0.27582	0.665694	-1.04848	-2.2078	-2.82683	1.14927	0.69459	-0.0547717	0.772485	-2.60816	1.46794	0.483173	-2.07812	-1.09679	-0.358045	-1.2249	0.835461	2.80551	-1.31287	-0.148225	0.280903	0.280903	0.64891	0.641723
705	E2AP22	Uncharacterized protein K03H1.5	-0.973835	-1.05744	1.59434	-0.63505	2.04577	-0.594242	0.945117	1.8958	-1.3511	1.01978	0.221339	-0.765679	-2.14193	0.268056	-0.189479	-0.131442	-0.901767	-0.938025	-1.80431	-0.221998	1.08346	-1.16333	1.56237	-2.26957	-0.586629	-0.688125	-1.16694	-1.51747	-0.205382	0.0686657	-1.06386	1.52801	0.0671537	-1.38835	0.212261	1.48697	-0.269564	0.759064	0.537956	1.17986	-0.0162331	-2.39633	-1.05939	0.242282	0.242282	0.676687	0.635136
696	E2AN92	Trifunctional enzyme subunit beta, mitochondrial	0.103947	0.533806	0.909495	-2.04984	-1.12956	-0.760294	1.01965	-0.172836	-0.752362	2.21671	1.9933	-3.14001	-2.05695	-0.0840284	0.314366	0.280991	-0.082666	0.276355	1.00092	-0.105192	-1.59853	2.39624	-2.85933	-0.968564	0.85023	1.63304	-0.71443	-0.377568	-0.189125	2.48562	-0.824093	-0.142521	-0.364114	0.275094	0.851752	0.322062	-0.726401	-0.899523	0.014228	1.08649	-0.365097	0.23123	-0.371622	-0.253197	0.253197	-0.660019	-0.632424
1069	E1ZWT9	Laccase-4	-0.185385	-1.33679	-1.23879	-1.44577	-0.351817	1.8988	-1.14436	-0.252593	-0.103352	-0.285715	1.16059	-3.47624	1.94791	-1.10724	-0.521239	-1.51152	-1.77106	3.17777	2.44068	2.70436	-0.225463	0.0046906	-0.509357	1.29259	-1.26232	-2.10933	-1.0337	2.77147	-0.518319	1.34532	-0.248562	0.648919	-0.181468	-1.76234	-0.377583	-1.60209	-0.290216	-2.07527	-3.14224	-2.03172	1.86567	1.78759	-1.02818	0.304898	0.304898	0.619906	0.630211
1199	E2A9P6	NA	-0.600803	-2.55635	1.37672	0.0733919	-3.50463	-1.15215	0.190608	-2.49289	-3.35516	-2.83219	-2.79917	-0.0532039	-2.57523	-1.68846	-1.31393	-1.30589	0.764009	-1.43182	-1.56618	-1.83037	-1.6955	-0.517868	-1.76879	1.54995	0.342593	-2.7866	-1.25383	-4.93616	-0.0826801	-0.322555	-0.805845	-0.539675	-1.1176	-0.753761	0.251595	-1.76432	-1.32186	-0.924573	-4.53754	1.25632	-2.0003	-1.60469	-1.40005	-0.281371	0.281371	-0.632566	-0.629544
810	E2ATW6	Robl_LC7 domain-containing protein	-0.304293	-0.905543	-0.99916	0.770095	0.501154	0.455895	-1.44778	-0.98089	-1.71342	-0.185636	-1.41766	-1.536	-0.869752	0.558114	-0.925769	-2.46372	2.52016	1.39959	0.195973	1.19512	-0.360327	-2.71353	-0.369067	-0.54049	0.392912	-0.730335	0.0998568	-2.29077	0.615936	-0.456143	0.947662	-1.73667	-1.01641	-0.875716	-1.0548	1.8259	-2.14568	-0.692941	0.596983	1.99824	2.18961	-0.537779	0.128535	-0.253131	0.253131	-0.653843	-0.62813
504	E2AE99	Synaptotagmin	0.767016	0.89481	0.00965095	0.525035	-0.320945	-0.313984	1.11598	1.51617	-0.517445	-0.947796	-0.713037	-2.02341	-2.1249	-1.59612	0.830479	-1.21946	2.32291	-1.69999	1.99909	-0.0999825	0.457217	1.1988	-1.51161	-0.254334	-1.22751	-0.281727	-0.00547568	0.958921	0.147204	-0.452121	0.101168	-1.54309	1.5308	0.133141	-0.823865	0.41879	-0.418588	-1.47876	-1.21558	0.855081	-1.06965	-0.975911	-0.23096	0.228513	0.228513	0.676985	0.623288
965	E2B1N6	Tyrosine-protein phosphatase Lar	0.177616	-1.27566	-0.616216	0.487294	-1.49757	1.23918	0.23069	-2.138	0.410368	-0.135974	-3.49889	-4.21523	-1.30045	-0.176363	-3.36485	0.292194	2.25726	-2.60532	-0.7611	-2.86406	1.91951	0.603431	-0.893458	0.768138	-0.908273	-1.01185	-2.35013	-5.14791	0.0936181	-0.0538348	-2.06159	-1.01034	0.476804	-0.685527	-2.32006	0.11459	0.736728	-1.39586	-4.98939	0.390983	-0.389025	-2.95201	0.858571	0.321141	0.321141	0.601569	0.620796
534	E2AFL7	TPR_REGION domain-containing protein	-0.38553	1.62945	-0.212602	-1.55006	-2.85294	2.054	-0.491371	2.94496	-0.466746	2.58607	-0.118684	-1.19722	0.506507	3.06547	-0.0384512	0.350819	-0.245848	2.11917	0.411433	-1.05445	-1.07889	0.710929	-1.07102	0.333836	-0.925547	2.43449	0.402721	-1.09108	-1.31341	-0.746033	-0.380399	-1.16337	0.201836	1.53256	1.21427	-2.11847	-0.611707	0.150425	-3.79566	2.14281	-0.988122	0.119034	3.51274	0.298583	0.298583	0.61031	0.619808
864	E2AWL4	Pyruvate carboxylase	-0.372117	-0.556512	0.427932	-0.802201	0.0522707	0.808828	-1.23401	-1.51189	3.29037	-0.585722	-0.158727	-3.55003	-0.629035	-2.25872	1.01797	2.4645	-0.0235746	-1.53452	-0.532926	-0.918924	0.850798	-0.768728	-1.81499	-1.20185	2.50773	0.668634	0.439286	0.614679	-3.33592	-0.286963	-1.89751	2.01766	3.61288	-1.28745	-1.28849	1.13683	-2.45753	1.39793	0.0432	0.0920533	-0.815924	-2.26787	1.06526	-0.300437	0.300437	-0.607194	-0.618005
200	E2A1B0	Dynein light chain	1.50128	1.078	-0.385345	-1.01273	0.358021	-1.33995	-1.70707	2.71	-0.413447	-0.179469	-1.21058	0.499023	0.220853	-2.43434	0.963702	-0.526413	0.838937	0.867122	-0.0381869	0.335615	-0.0160202	-0.715099	2.76789	-0.958818	1.80343	-0.0864187	-0.282645	0.0913937	-1.0349	0.776189	0.0654773	0.121874	-0.222082	0.311767	0.00147091	0.0214558	-1.63856	0.0596727	1.04433	-2.19482	-2.73367	1.04583	0.897425	0.239571	0.239571	0.652859	0.617442
[truncated: 491 more rows]
[truncated: 13 more columns]

## Sheet: LIMMA - YvM - FIX
id	Uniprot	Symbol	iBAQ.NoFieldMatA	iBAQ.NoFieldMatAA	iBAQ.NoFieldMatBB	iBAQ.NoFieldMatF_rep	iBAQ.NoFieldMatG	iBAQ.NoFieldMatH	iBAQ.NoFieldMatI	iBAQ.SoFieldMatK	iBAQ.SoFieldMatLmin1	iBAQ.NoFieldMatM	iBAQ.NoFieldMatNmin1	iBAQ.NoFieldMatO_rep	iBAQ.NoFieldMatP_rep	iBAQ.SoFieldMatQ	iBAQ.SoFieldMatR	iBAQ.SoFieldMatS	iBAQ.SoFieldMatT	iBAQ.SoFieldMatU	iBAQ.NoFieldMatV	iBAQ.NoFieldMatW	iBAQ.NoFieldMatX	iBAQ.NoFieldMatY_rep	iBAQ.NoFieldMatZ	iBAQ.NoFieldYoung2002	iBAQ.NoFieldYoung2004	iBAQ.SoFieldYoung2007	iBAQ.SoFieldYoung2009	iBAQ.NoFieldYoung2011	iBAQ.NoFieldYoung2012	iBAQ.NoFieldYoung2014	iBAQ.SoFieldYoung2016	iBAQ.SoFieldYoung2018	iBAQ.SoFieldYoung2020	iBAQ.SoFieldYoung2021	iBAQ.SoFieldYoung2022	iBAQ.SoFieldYoung2023	iBAQ.NoFieldYoung2026	iBAQ.NoFieldYoung2027	iBAQ.NoFieldYoung2028	iBAQ.NoFieldYoung2029	iBAQ.NoFieldYoung2030	iBAQ.NoFieldYoung2033	iBAQ.NoFieldYoung2036	logFC	t.ord	t.mod	p.ord
[truncated: 515 more rows]
[truncated: 12 more columns]

[truncated: 6 more sheets: LIMMA - NvF, LIMMA - NvF - FIX, LIMMA - FvL, LIMMA - FvL - FIX, LIMMA - NvS, LIMMA - NvS - FIX]
