# Supplementary material for: Biomarkers in a socially exchanged fluid reflect colony maturity, behavior, and distributed metabolism
Source: eLife. 2021 Nov 2;10:e74005. doi: 10.7554/eLife.74005 (PMC8608388; doi:10.7554/eLife.74005)
Supplement: Supplementary file 5. — Accuracy, seed, and mean feature importances for each gene are reported for each model trained for the random forest analyses. [file elife-74005-supp5.xlsx]

## Sheet: Legend
Supplemental file 5: Full machine learning statistical results
These supplemental files share the full results of all the models run. For the classical frequentist models (Supplemental File 3), the imputed data are also shared. For the empirical Bayes LIMMA models (Supplemental File 4) results are shared as raw output tables. Accuracy, seed, and mean feature importances for each gene are reported for each model trained for the random forest analyses in Suppl…

## Sheet: RF - YvM
	Accuracy	0.909	1	0.889	0.889	1	0.778	0.778	0.778	0.889	0.778		0.8688
	Seed	10	11	12	13	14	15	16	17	20	21
	col_name	feature_importance_vals	feature_importance_vals	feature_importance_vals	feature_importance_vals	feature_importance_vals	feature_importance_vals	feature_importance_vals	feature_importance_vals	feature_importance_vals	feature_importance_vals
48	XP_011255281.1-E2AC28-E2AC29	0.861459	1.43409	1.11505	0.519069	0.839179	0.693169	1.13144	0.467518	0.529098	0.697786		0.828786
14	XP_025263077.1	0.92044	0.465151	0.957386	0.596055	0.357449	0.919614	0.382307	1.26061	0.619276	0.618737		0.709703
2	XP_025263096.1-XP_025263073.1-XP_025263075.1-E2B003	0.286247	0.447751	1.43721	0.484651	0.50032	1.04007	0.838837	0.474709	0.781816	0.673706		0.696532
11	XP_025263304.1-XP_011263078.2	0.47537	0.978464	1.00731	0.697348	0.479934	0.765098	0	0.524898	0.417379	0.228321		0.557412
325	XP_025266889.1-E2A031	0.687411	0.500137	0.493056	0.650943	0	0.42328	0.470438	0.354952	0.48235	0.346811		0.440938
19	XP_025269485.1-XP_025269481.1-E2A1Y6	0.448213	0.723127	0.597123	0.297348	0.374135	0.334068	0.324598	0.424379	0.319878	0.421092		0.426396
141	XP_011255653.1-E2ACR9	0.278582	0.371661	0.230519	0.276252	0.878978	0.288015	0.286716	0.801989	0.241984	0.45462		0.410932
5	XP_011255282.1-E2AC27	0.13623	0.226481	0.310565	0.0443968	0.383115	0.482439	0.769454	0.645158	0.5937	0.252578		0.384412
82	XP_011259279.2	0.550786	0.130794	0.375908	0.529941	0.270837	0.24421	0.480193	0.356145	0.262744	0.238693		0.344025
211	XP_025262495.1	0.205273	0.479915	0.198529	0.154167	0.574054	0.289259	0.327956	0.315969	0.285633	0.452025		0.328278
61	XP_025263365.1	0.405618	0.2324	0.349116	0.429259	0.0978069	0.263344	0.615	0	0.322734	0.53901		0.325429
348	XP_025269663.1-XP_025269662.1-XP_025269661.1-XP_025269660.1-E2A1Z0-XP_025269664.1	0.413844	0	0.349387	0.329749	0.440205	0.475538	0.256366	0.398273	0.0947931	0.23541		0.299356
298	E2A8M5-XP_025269992.1	0.224587	0.255089	0.239961	0.281652	0.413528	0.0422848	0.454605	0.203433	0.223229	0.54856		0.288693
133	E2A4U9-XP_019882208.1-XP_011251636.1-XP_011251639.2	0.597755	0.334528	0.31098	0.298992	0.561346	0.018299	0.255684	0	0.248836	0.239727		0.286615
18	XP_025264718.1	0.497464	0.151333	0	0.661036	0.394202	0	0.234017	0.153296	0.358464	0.217101		0.266691
29	XP_011253495.1-E2A8P0	0	0.410073	0.164964	0.0549822	0.371678	0.673903	0.136445	0.433528	0.157463	0.203607		0.260664
25	E2AC94	0.185089	0.462112	0.484006	0.249474	0.183198	0	0.418233	0.0733824	0.232899	0.267456		0.255585
303	XP_025269121.1-E2A330	0.311418	0	0.0652412	0	0.0840781	0.499229	0.359812	0.598258	0.25078	0.280125		0.244894
15	XP_011266010.1-E2AY02	0.0878706	0.249188	0.223885	0.367602	0.324962	0.0969196	0.559816	0	0.326218	0.203918		0.244038
4	XP_011266069.1-E2AY28	0.361301	0.587283	0.142711	0	0.20357	0.472919	0.17856	0	0.290858	0.127735		0.236494
79	XP_011257736.2	0.279475	0.28887	0	0.236284	0.348174	0.494618	0.143872	0.0325	0.212028	0.209523		0.224534
56	XP_019884420.2	0.207031	0.112759	0.0752801	0.151353	0.464632	0	0.434809	0.324572	0.17384	0.276381		0.222066
190	E2AXM8-XP_011265872.1	0.0762862	0.617485	0.469191	0.0853361	0.268515	0.0502643	0	0.127053	0.122048	0.151363		0.196754
102	XP_011269567.2-E2A1T1	0.110191	0.0240905	0.2468	0.235626	0.182457	0.135118	0.338266	0	0.23361	0.255581		0.176174
401	XP_025269493.1	0.491725	0.0803431	0.0207672	0.114942	0.280667	0.134056	0	0.120579	0.359952	0.158071		0.17611
307	XP_025270599.1-XP_025270598.1-E1ZY72	0.0761046	0	0.415378	0.0668697	0.359773	0	0.403084	0.0967291	0.136112	0.204053		0.17581
21	XP_019882311.2-E2A631	0.153289	0.180723	0.23351	0	0.276747	0.584305	0	0.216749	0.019449	0.0365733		0.170135
130	XP_011263352.1-E2ASQ5	0.0255392	0.216632	0.08841	0.293954	0.438974	0	0.153413	0.187353	0.129415	0.135637		0.166933
36	XP_025269126.1	0.358136	0.111754	0.0793214	0.199639	0.13623	0.249682	0	0.18201	0.172602	0.172428		0.16618
156	XP_019883183.1-E2AEN9-XP_011256790.1	0.284974	0	0.160868	0	0.234106	0	0.312872	0.254774	0.0587776	0.349603		0.165597
10	XP_025266319.1-E1ZXZ5-E2AC93	0.115347	0.0504995	0.166914	0.285839	0.405826	0.183406	0.120108	0.0394293	0.0410512	0.221272		0.162969
34	XP_025269201.1-XP_025269204.1-XP_025269202.1-XP_025269214.1-XP_025269200.1-XP_025269199.1-XP_025269198.1-XP_025269197.1-XP_025269196.1-XP_025269195.1-XP_025269194.1-XP_025269193.1-XP_025269192.1-XP_025269191.1-XP_025269189.1-XP_025269188.1-XP_025269187.1-XP_025269186.1-XP_025269185.1-XP_025269184.1-XP_025269183.1-XP_025269182.1-XP_025269181.1-XP_025269180.1-XP_025269179.1-XP_025269178.1-XP_025269…	0.0388015	0	0.18882	0.355365	0.0782538	0	0.101752	0.174609	0.489826	0.184928		0.161236
58	XP_011266004.2	0.123086	0.28342	0.281676	0.124221	0.0193333	0.290499	0.172011	0.124255	0.138187	0.0212726		0.157796
7	XP_011252932.2-E2A7K7	0.0742549	0.199548	0	0.165154	0	0.191553	0.126772	0.244531	0.279627	0.286885		0.156832
38	E2AJL8	0.193021	0.0376244	0.120969	0.186611	0.161593	0.236344	0.155506	0.176487	0.151028	0.123105		0.154229
98	XP_011260780.1-E1ZXJ7	0.193399	0.112473	0.201459	0.148883	0.092498	0	0.110138	0.135635	0.270053	0.259942		0.152448
16	XP_025262760.1-E2ATD2	0.0831541	0.146913	0	0.34716	0.18568	0.230603	0	0.0571294	0.22845	0.185951		0.146504
24	XP_025264610.1	0.119096	0.0724222	0.0452381	0.196505	0.319951	0.292926	0.255895	0	0.0427169	0.11307		0.145782
45	E2AX77-XP_025264787.1-XP_025264786.1-XP_025264785.1-XP_025264784.1-XP_025264782.1-XP_011265555.2-XP_011265554.2-XP_011265551.2	0.0768508	0	0.143734	0.131938	0.101685	0.196574	0.162892	0.357905	0.0319681	0.0994721		0.130302
161	XP_011257948.1-XP_011257947.1-XP_011257946.1-XP_011257945.1-E2AH19	0.102464	0.142358	0.312234	0.125833	0	0	0.125937	0.120882	0.205774	0.140147		0.127563
73	E2ARJ0-XP_011262743.2	0.150054	0.135622	0	0.139608	0	0.10922	0.399557	0	0.193308	0.0914563		0.121882
59	XP_011264740.1-E2AVJ5	0.0415823	0.259193	0.201417	0.391513	0	0	0	0.13423	0.0217333	0.153918		0.120359
134	XP_011266818.1-E2AZK6-XP_011266817.1	0.151272	0.170816	0	0.19979	0.221092	0.103107	0.095498	0	0.0695154	0.0476199		0.105871
208	XP_025268061.1-XP_011260793.1-E2AMG4	0.0894196	0.306718	0.126093	0.0778448	0.147185	0	0	0.129632	0.0369498	0.0485341		0.0962377
214	XP_011250812.1-E2A3F2	0.132325	0.357815	0.118183	0	0.248173	0	0	0	0.0402163	0.0632109		0.0959924
153	XP_019885340.1-E1ZZ64-E1ZZ62	0	0.0518824	0.172084	0.154101	0.0459706	0	0.0401238	0.277719	0	0.205026		0.0946906
68	XP_011268594.2	0.0983956	0.0759331	0	0.0827902	0.0964744	0.131947	0	0.319549	0.0587463	0.0738398		0.0937675
1	XP_025269163.1-E2AZ61	0.032479	0.080473	0.139559	0.0272488	0.0670623	0.29473	0	0.132304	0.0716086	0.076798		0.0922263
371	XP_025269141.1	0.111232	0.148218	0	0.0367435	0.0221863	0	0.151765	0.0458	0.123608	0.241067		0.0880619
101	XP_011254133.1-E2A9W2	0.0366799	0.191923	0.0813676	0.139989	0	0.256374	0	0	0.0915886	0.0713165		0.086924
332	XP_011260293.1-E2ALF0	0.097192	0.132892	0.0454545	0	0	0	0.137754	0.337843	0.0452189	0.0620678		0.0858423
265	E2B271-XP_011268025.2	0	0.0677284	0	0.215819	0.0779193	0	0.146302	0.198137	0.0581759	0.0899498		0.0854031
46	E2ARH9-XP_011262712.1	0.0623162	0.168202	0.111148	0.125085	0.106516	0.0642377	0	0.139678	0.0287759	0.0433732		0.0849332
3	XP_011259281.2	0.0774526	0.063194	0	0	0.173153	0.11008	0	0.165049	0.161222	0.0971739		0.0847325
92	XP_019882849.1-E2AB23	0	0.0198985	0.210644	0.172319	0	0	0.0977432	0	0.0533273	0.276525		0.0830458
138	XP_025265088.1-E2AG27	0.195053	0	0.0999815	0	0.022936	0.398673	0	0	0.088604	0.0250116		0.083026
248	XP_011265933.1-XP_011265930.1-E2AXR8	0.264171	0	0	0.0700159	0.0771253	0.18648	0.0640098	0	0.0878684	0.0804703		0.0830141
83	XP_025265223.1-XP_025265222.1-XP_025265221.1	0.0625512	0.0576604	0.11899	0.461651	0.0469272	0	0	0	0.0176225	0.0609006		0.0826304
169	E2A6W8-XP_011252591.1	0.159796	0.0686673	0	0	0	0	0.337142	0	0.139932	0.10947		0.0815007
472	E2ATZ6-XP_025266208.1	0.182185	0	0.0916522	0.344682	0	0	0	0	0.117173	0.0514638		0.0787156
385	XP_011264256.1-XP_011264255.1-XP_011264254.1-E2AUK6	0.122425	0.133204	0.0781039	0.270558	0	0	0	0	0.132734	0.0422427		0.0779267
17	XP_011266630.1-E2AZ60	0.0796524	0	0.117516	0.0509804	0.120298	0.280387	0.0751716	0	0.0118372	0.0388448		0.0774688
99	XP_011253127.1-XP_011253125.1-E2A7Y1-XP_025266675.1-XP_011253124.1	0.0886765	0.0585202	0.170362	0.0925901	0.203868	0	0.111463	0	0.0186594	0.0141807		0.075832
39	XP_025262246.1	0.193848	0.101176	0	0.051208	0.0226275	0	0.257286	0	0.0463664	0.0469063		0.0719419
272	XP_025268772.1-E2A225	0	0.153239	0.0826348	0	0	0	0.258839	0.153591	0.0150221	0.0540132		0.0717339
302	XP_011269506.1-E2A1Q0	0	0.0762328	0.206979	0	0	0	0.125343	0	0.073783	0.224383		0.0706721
197	XP_011268843.1-XP_011265835.1-XP_011264345.1-XP_011264342.1-E2AUU4-E2A0I7	0	0.152599	0.0213889	0.13456	0.0489492	0.122777	0	0.116201	0.0479352	0.0622898		0.07067
119	XP_011266939.2-E2AZU0	0	0	0	0.128852	0.144356	0.183523	0.119429	0.101176	0.0148231	0.0139156		0.0706075
6	XP_011257802.2-XP_011257800.2	0.0498039	0.178509	0.259167	0	0	0	0	0.099152	0.0196352	0.0961568		0.0702424
218	XP_011254740.1-E2AB19	0.0295382	0	0	0	0.0752632	0.31094	0.155539	0	0.116274	0.0118691		0.0699423
341	XP_025266198.1-XP_025266197.1-XP_025266196.1-XP_025266195.1-XP_019882760.2	0.0306639	0.19152	0.175056	0.0800082	0	0.0594412	0	0.0364118	0.0379905	0.0469444		0.0658037
213	XP_025270637.1-XP_011269375.2-XP_011269374.2-E2A1F2-XP_025270580.1-E2A1F3-XP_025270579.1-XP_025270578.1	0.130166	0	0	0.0507479	0.159437	0	0	0.104001	0.19615	0.0169861		0.0657488
142	XP_011266940.1-E2AZU1	0.171223	0.0811477	0.0674808	0	0.0806071	0.0537638	0	0.103563	0.041063	0.0542779		0.0653126
171	XP_011268592.1-XP_011268591.1-E1ZZY1	0.118396	0.140732	0	0.101675	0	0	0	0.127064	0.0711591	0.0714379		0.0630463
78	XP_011256478.1-E2AE51	0.249551	0.109706	0.122491	0	0	0.0691176	0	0	0.0667845	0.0123152		0.0629966
120	XP_011255639.1-E2ACR2	0	0.114997	0.199085	0.249296	0	0	0	0	0.0261071	0.0219277		0.0611413
37	XP_011267011.2	0.158557	0.0744679	0	0.175441	0	0.0489706	0	0	0.0761771	0.0769361		0.0610549
42	XP_025264613.1	0.172359	0.11391	0.0647059	0	0.0565653	0	0.120815	0	0.0508244	0.0310576		0.0610237
231	XP_025270291.1-E2AAT8	0	0.125698	0.0712955	0.0962971	0.0686667	0.127084	0	0.0645955	0.0172185	0.0202934		0.0591148
191	XP_011251612.1-E2A4T7	0	0.072687	0	0.205934	0	0	0	0.157337	0.139197	0.0132274		0.0588382
26	XP_011252309.2-E2A6E2	0.115747	0	0.13049	0.107973	0.0542279	0	0.101451	0	0.0214461	0.0266106		0.0557944
60	XP_019884394.1-XP_011262974.1-E2ARX6	0.179977	0.13432	0.0722824	0	0	0	0	0.0563634	0.0792601	0.0216305		0.0543833
305	E2AVY8-XP_011264984.2	0.0244825	0	0.072902	0.118187	0	0	0.122262	0	0.0738335	0.130868		0.0542535
57	E2AX18-XP_011265519.1-XP_011265517.1	0.128052	0	0	0.122956	0.101786	0.120261	0	0.0439528	0.0151637	0.005662		0.0537834
43	XP_011252301.1-E2A6C9	0.103405	0	0.124202	0	0.0536029	0	0.0807093	0	0.112754	0.0573964		0.0532069
126	XP_025270284.1-XP_025270283.1-E2ALT3	0.174075	0.175259	0.102384	0	0	0.0339422	0	0	0.0202188	0.0211476		0.0527027
453	XP_011269716.3-E2A226	0.210139	0	0	0	0.105844	0	0	0	0.174844	0.0358597		0.0526686
254	XP_011256137.1-E1ZWP1	0.112422	0.237345	0	0.118035	0	0	0	0.0381965	0.0157227	0.001947		0.0523668
88	XP_011267538.1-E2B155	0.162162	0	0.130994	0.0351225	0.057901	0	0	0	0.0355716	0.085809		0.050756
345	XP_025269810.1-XP_025269809.1-XP_025269808.1-XP_025269807.1-XP_025269806.1	0.0516194	0.101996	0	0	0.0947234	0	0.0577376	0.153534	0	0.045997		0.0505606
239	XP_011261969.2-E2APZ5	0	0.12169	0	0	0	0	0.155526	0.171154	0.0203922	0.0335135		0.0502276
164	XP_011261637.1-E2APC4	0.0753782	0	0.144568	0	0.0804974	0	0.0498529	0	0.0503829	0.100312		0.0500992
158	XP_025269062.1-E2AGL2	0	0	0	0	0.141326	0.205232	0.115184	0	0.00823529	0.0265415		0.0496519
32	XP_011261399.1-E2ANT2	0	0	0	0.0859591	0.234387	0	0	0.112462	0.0212912	0.0319253		0.0486025
394	XP_011258245.1-E1ZX53	0.250756	0	0	0.0997261	0.0419247	0	0	0	0.0188462	0.0715414		0.0482795
91	XP_011264019.1-E2AU75	0	0.256131	0	0.0912605	0.0506386	0	0.0607746	0	0.0110882	0.0115515		0.0481444
97	XP_025267301.1-E2B0F9-XP_025264883.1-XP_025264884.1-E1ZYR2	0	0.197543	0	0.0178627	0.0994545	0	0.143067	0	0.0101933	0.0106425		0.0478763
109	XP_025268048.1	0	0.0539586	0.129226	0.116268	0.084828	0	0	0.071334	0.0105882	0.00892107		0.0475124
122	E2A5R3-XP_011252033.1-XP_011252032.1-XP_011252034.1-XP_011252062.1	0	0	0.0210268	0.0813983	0.0240523	0.197215	0.0773954	0.0460609	0.0225029	0.00386966		0.0473521
188	E2ABW9-XP_011255166.1	0	0	0.165714	0.117558	0	0	0	0.157034	0.0187003	0.0135418		0.0472548
146	XP_019884788.1-XP_019884801.1-XP_019884800.1-XP_019884798.1-XP_011265227.1-XP_019884796.1-XP_019884794.1-XP_019884790.1-XP_019884789.1-XP_019884786.1-XP_019884785.1-XP_025267686.1-XP_019884802.1-XP_025267684.1-XP_019884792.1-XP_019884791.1-XP_019884787.1-XP_019884803.1-XP_025267682.1-XP_019884793.1-XP_025267685.1	0.0817501	0.132307	0	0	0	0	0.0418137	0.151366	0.0330919	0.0241351		0.0464464
136	XP_011261310.1-XP_011261309.1-XP_011261308.1-XP_011261307.1-XP_011261306.1-E2ANL8	0	0.0494706	0	0	0	0.15239	0.124061	0	0.0626293	0.0732648		0.0461816
90	XP_011259751.1-E2AKD6	0	0	0	0	0.0316118	0	0.158235	0.259541	0.00623115	0.00553532		0.0461155
262	XP_025267364.1-E2AMN5-E2AMN4	0.0558088	0.0229349	0	0	0.0885442	0	0	0.143355	0.110462	0.0367374		0.0457842
261	XP_011257674.1-E2AGG5-XP_025265771.1	0.222772	0.0803178	0	0	0	0	0	0.0285588	0.0917235	0.0281292		0.0451501
167	XP_011267621.1-E2B1B7	0	0.0401503	0	0.125944	0.0735294	0.104252	0	0	0.06096	0.0453922		0.0450227
359	XP_011252980.1-E2A7M9	0	0.217095	0.203838	0	0	0	0	0	0	0.0199278		0.044086
86	XP_011259459.2-E2AJX6	0	0.0503546	0	0.238596	0.133808	0	0	0	0.00768908	0.0102012		0.0440649
297	E2ARB2-XP_011262616.1-XP_011262620.1-XP_019884311.1-XP_019884310.1-XP_019884308.1-XP_019884307.1-XP_019884306.1-XP_011262619.1	0	0.017451	0	0	0	0.103191	0.0488725	0.227474	0.0392601	0.00342283		0.0439672
75	XP_011267122.2-XP_011267116.2-XP_011267109.2-XP_011267102.2-XP_011267093.2-XP_011267131.3-E1ZYU8	0.0884633	0.0321176	0.150751	0.0206583	0	0	0	0	0.115283	0.0289812		0.0436255
370	XP_011268780.1-XP_011268779.1-E2A0E7	0	0	0.0271618	0	0.0248301	0.257815	0	0.113998	0	0.00997556		0.0433781
181	XP_011260992.1-E2AMW3	0.0590174	0.0681793	0.0552489	0	0.0612549	0.104003	0	0	0.0247323	0.0609569		0.0433393
189	XP_019884913.1-XP_011266002.1-E2AY00	0.0373897	0	0.0632818	0	0	0.0788918	0	0.104038	0.0754363	0.0734192		0.0432456
249	XP_011258106.1-E2AHG9-XP_011258105.1	0	0.0837659	0.121078	0	0.0597794	0.0659502	0	0.0858721	0.00727843	0.00801011		0.0431735
145	E2B123-XP_025270483.1-XP_011267482.1	0	0	0.0683333	0	0.107967	0	0.142463	0	0	0.109415		0.0428178
54	XP_019882348.2-E2A6E1	0.102606	0.0535084	0.0981335	0	0.0800735	0	0	0.0477941	0.0125893	0.0315445		0.042625
337	XP_011259637.1-E2AK65	0.16946	0.0347367	0.0332315	0	0.125942	0	0	0	0.0500973	0.00740279		0.042087
9	E2AZ59-XP_011266628.1	0.160203	0.03	0.0465109	0.0240002	0.0545609	0	0	0.0360458	0.0407543	0.0284426		0.0420518
111	XP_011263402.1-E1ZY32	0	0.0989813	0	0.162678	0	0	0.0961838	0	0.0249116	0.0306725		0.0413427
117	E1ZV54-XP_011267596.1	0.107382	0.0901532	0.0657794	0	0	0	0	0	0.0486475	0.0988834		0.0410845
346	E2ABB7-XP_025262434.1-XP_025262433.1-E2AAW0-XP_011254668.2-XP_025263358.1-XP_025263357.1-XP_011260570.1-XP_025263356.1-XP_011260569.1-XP_011260568.1-E2ALY5-XP_011260567.1	0.232594	0	0.107243	0	0	0	0	0	0.0540229	0.0123044		0.0406163
52	XP_019884091.1-E1ZXR7	0.0237093	0	0.0753425	0.0734327	0	0	0	0.189706	0.0280099	0.0154749		0.0405675
205	E2AJ75-XP_011259035.1-XP_011259034.1-XP_011259042.1	0	0	0.0120121	0.129488	0	0.0735882	0.0986079	0	0.0587673	0.0285424		0.0401006
224	XP_011260853.1-E2AMK4	0.046412	0.204037	0	0.0227891	0.0745289	0	0	0	0.0357054	0.0120811		0.0395553
229	XP_025264147.1	0.0879245	0.220145	0	0	0	0.0663889	0	0	0.00922682	0.00997926		0.0393665
215	XP_011264961.1-XP_011264960.1-E2AVX9	0.20155	0.0337132	0	0	0.0406424	0	0	0.10299	0	0.0088786		0.0387774
40	XP_011267533.1-XP_011267532.1-XP_011267531.1-E2B153	0.022435	0	0.141959	0	0	0	0.0679412	0.0412534	0	0.114121		0.038771
280	XP_011266663.1-E2AZ96	0.183976	0	0.093733	0.0414732	0	0	0	0	0.0596258	0.00426691		0.0383075
419	E1ZVB4-XP_011268973.1	0	0	0.0221639	0.106465	0.0729239	0.170153	0	0	0	0.00639921		0.0378105
433	XP_011255213.1-XP_011255212.1-XP_025267753.1-E2ABZ0	0.0512402	0.0985116	0	0.119399	0.0308382	0	0	0	0.0490115	0.0280887		0.0377089
140	XP_011267179.1-E2B0D3	0.0413991	0	0.0204713	0	0	0	0.135407	0	0.132992	0.0305582		0.0360827
71	XP_011254210.2-XP_011254209.2-E2AA04	0.0466544	0.027398	0	0.133981	0.0384267	0.0720294	0	0	0.0186485	0.0232091		0.0360347
204	E2A599-XP_011251836.1	0	0	0	0	0	0.116804	0	0.157361	0.0621713	0.0176772		0.0354014
131	E2A543-XP_025262620.1	0	0.124477	0	0	0	0	0	0.190597	0	0.0341188		0.0349193
358	XP_011251028.1-E2A3R3	0	0.0323301	0	0.101358	0.0283065	0	0	0	0.0252101	0.153089		0.0340294
365	E2AXN0-XP_011265873.1	0	0.0515672	0	0.127284	0	0.0186008	0	0.113477	0.01194	0.0147871		0.0337656
342	XP_011264652.2-E2AVF4	0	0	0.0304095	0	0	0.0665196	0.129403	0	0.0252824	0.0849845		0.0336599
306	XP_011253234.2-XP_011253233.2-XP_011253232.2-E2A880-XP_011253230.2-XP_011253229.2-XP_025265359.1-XP_011253238.1-XP_011253235.2-XP_011253236.1	0	0	0.083207	0.12197	0	0	0.10699	0	0.0132038	0.0106793		0.033605
105	XP_011256347.1-XP_011256346.1-E2ADZ5	0.105686	0	0.0551238	0.0751797	0.0500783	0	0	0	0.038439	0.0101212		0.0334628
118	E2AFA5-XP_011257049.1-XP_011257048.1	0	0	0	0	0.146548	0	0.0358333	0	0.136636	0.0145115		0.0333529
390	XP_011251312.2-E2A452	0	0.117014	0	0	0.112903	0	0	0.0840066	0.00589118	0.00994606		0.0329761
201	XP_011254033.1-E2A9P2	0	0.0146691	0.0720986	0	0	0	0.0442647	0.100532	0.0222821	0.0692651		0.0323111
288	XP_011258055.1-E2AHA9	0	0	0.091709	0	0.0847381	0	0	0	0.0683889	0.0775568		0.0322393
329	XP_011255229.1-XP_011255228.1-E2ABZ4-E2ABZ3	0.0972353	0	0	0	0	0.134453	0.0820588	0	0	0.00827813		0.0322025
423	E2AKU3-XP_011259976.1	0	0.117186	0	0	0	0	0.0657086	0.0476629	0.0836289	0.00560963		0.0319796
147	XP_019884712.1-XP_011264422.1	0.122885	0	0.0924706	0	0	0.0825856	0	0	0.0103824	0.00919616		0.031752
183	XP_011262417.1-E2AQX7-CON__ENSEMBL:ENSBTAP00000025008	0	0	0.0943141	0	0.0784069	0.0786371	0	0	0.0331217	0.0317415		0.0316221
53	XP_011259391.1-XP_011259390.1-E2AJT8	0	0	0.131162	0.0238498	0	0	0	0.140307	0.0117418	0.0080486		0.0315109
257	XP_011258820.1-E2AIU9	0.0822995	0.0291453	0.0590114	0	0	0	0.130526	0	0.00413455	0.00798291		0.03131
152	XP_011261591.1-E2AP90	0	0.0970482	0.0628793	0	0.0795823	0	0	0	0.0256647	0.0453823		0.0310557
240	XP_011254633.1-E2AAT2	0	0	0.118303	0	0	0	0	0.122395	0.00833186	0.0588145		0.0307844
96	XP_025266940.1-XP_019883729.1-E2AKF6	0	0	0	0.0947385	0.0628105	0.0436317	0.0444025	0	0.0340568	0.0268167		0.0306457
22	XP_025269812.1	0.0628379	0	0	0.0454244	0.0618487	0.0945028	0	0	0.015503	0.0244706		0.0304588
8	E2AIX5-XP_025263124.1	0.134777	0	0	0	0.0241914	0	0.0914831	0	0.0312036	0.0200172		0.0301672
206	E2A0I0-XP_011268828.1-XP_011268827.1	0.0934905	0.0202696	0	0.0594029	0	0.0853992	0	0	0.00512828	0.0307596		0.029445
356	XP_011267566.2-E2B178	0	0	0	0.0301422	0	0	0.204873	0	0.0275046	0.0302735		0.0292793
379	XP_011265787.1-XP_011265786.1-XP_011265785.1-XP_011265784.1-XP_011265783.1-XP_011265782.1-XP_025264776.1-XP_025264775.1-XP_011265781.1-XP_011265779.1-XP_011265778.1-XP_011265776.1-E2AXI4-XP_019884889.1-XP_011265780.1	0.0192921	0.0823775	0.0180576	0.0406373	0.11991	0	0	0	0	0.0106913		0.0290966
203	XP_025269686.1-XP_011266030.1-E2AY69	0	0.046069	0.102838	0.0464756	0.0201772	0.0582941	0	0	0	0.010984		0.0284838
260	XP_025269241.1-E2AMU9	0.0725002	0.112487	0	0	0	0	0.0866261	0	0	0.0120117		0.0283625
273	XP_011263226.1-E2ASG6	0	0.0579132	0	0.0798833	0	0	0	0	0.0695546	0.0753507		0.0282702
149	XP_025267265.1-E1ZYQ6-E1ZYQ5	0	0.0726807	0	0.0634853	0	0	0	0.11631	0.0189004	0.00466383		0.027604
74	XP_011264892.1-XP_011264890.1-E2AVV1	0.0276099	0	0	0	0	0	0.0858956	0	0.151969	0.0088674		0.0274342
116	E2AK03-XP_025267872.1	0	0	0	0.0882642	0.0814406	0.0280801	0	0	0.0233716	0.049061		0.0270217
94	E2A4H5-XP_011251451.1	0	0	0.0466176	0	0.0672642	0	0	0.0877172	0.0141438	0.0479341		0.0263677
373	XP_011253770.2-E2A938	0	0	0	0.0788412	0	0	0	0.0905735	0.011057	0.0813687		0.026184
166	XP_011257750.1-E2AGM0-E2A8L3-XP_011253498.1	0	0.117174	0	0.023552	0.0842563	0	0	0	0.0134748	0.0225877		0.0261044
128	XP_011251922.1-XP_011251921.1-E2A5G4	0.127302	0	0	0	0	0	0	0	0.101351	0.0291226		0.0257776
137	XP_011257938.1-E2AH16	0.0622543	0.0269118	0	0.0762206	0.0718028	0	0	0	0	0.0187009		0.025589
64	XP_011255385.1-E2ACC1	0	0.202454	0	0	0	0	0	0	0.0223956	0.0306153		0.0255465
343	XP_025266115.1-XP_025266112.1-XP_011258258.1-XP_011258256.1-XP_025266109.1-XP_011258255.1-E2AHP8	0	0.0543791	0	0	0.0604721	0	0	0	0.0315966	0.107204		0.0253651
182	XP_011262389.1-E2AQV0	0.086629	0	0	0.0810185	0	0	0.0733065	0	0	0.0119582		0.0252912
242	E2AGQ0	0	0.0780152	0	0.137994	0	0	0	0	0.024009	0.00359326		0.0243612
31	XP_025265137.1-E2ABS8	0	0	0.0811412	0	0	0	0.0665248	0	0.05738	0.0381331		0.0243179
202	XP_011253554.1-E2A8R8-XP_011253553.1-XP_011253552.1	0.101865	0	0	0	0	0	0	0	0.046239	0.0933282		0.0241432
51	XP_011269703.1-XP_011269702.1-E2A252-XP_011257369.1-XP_011257368.1-XP_011257367.1-E2AFT7	0	0.066044	0.0313458	0	0.136011	0	0	0	0	0.00394202		0.0237343
33	XP_025262946.1-XP_019882428.1-XP_019882427.1-XP_019882425.1-XP_019882423.1-XP_019882399.1-XP_019882376.1-XP_025262953.1-XP_025262951.1-XP_025262949.1-XP_025262945.1-XP_025262944.1-XP_025262943.1-XP_019882419.1-XP_019882418.1-XP_019882409.1-XP_019882401.1-XP_019882400.1-XP_019882398.1-XP_019882396.1-XP_019882393.1-XP_019882391.1-XP_019882383.1-XP_019882380.1-XP_019882377.1-XP_019882375.1-XP_025262…	0	0	0	0.0715897	0.0186765	0	0	0	0.136839	0.00880211		0.0235908
106	XP_011258566.1-XP_011258565.1-E2AIC5	0	0	0.0403137	0	0	0.144314	0	0	0	0.0496981		0.0234326
326	XP_011267679.1-E2B1G2-XP_011267678.1	0	0	0	0.154287	0.0172727	0	0	0.049651	0.012205	0		0.0233416
287	XP_011267373.1-XP_011267372.1-XP_011267371.1-XP_011267370.1-E2B0R2	0.0249652	0.12701	0	0.0522269	0	0	0	0	0.0208143	0.00715869		0.0232175
87	XP_011258052.1-E1ZX35-E2ANB5-XP_011262825.1-E2ARN6-E2ARF2-XP_011262682.2-XP_011261161.2	0.0964723	0	0	0	0.0619171	0.0658562	0	0	0	0.00739061		0.0231636
170	XP_011255648.1-E2ACR5	0	0.104166	0	0.0262255	0	0	0.0805348	0	0.00882095	0.0102797		0.0230027
217	E2A4Q4-XP_011251564.1	0	0.0512745	0	0.0935689	0.0312418	0	0	0.0252353	0.01207	0.0109556		0.0224346
377	XP_011253226.1-E2A849-XP_011253225.1	0	0.0457127	0	0.0775735	0.0850063	0	0	0	0.00864347	0.00716921		0.0224105
143	XP_025270281.1-XP_019883853.1-XP_011260498.1-E2ALT1	0	0	0	0	0	0	0.0956291	0.0414194	0.0726288	0.0142825		0.022396
104	E2AGG0-XP_011257663.3	0	0.0317647	0	0	0	0	0.112045	0	0.0300277	0.0496282		0.0223466
114	XP_011260763.1-E2AMD6-XP_011260762.1	0.0305392	0	0	0	0.104702	0	0.0649208	0	0.0124282	0.00876666		0.0221357
178	XP_011262918.1-E2ARU3	0.0501791	0	0	0	0	0	0	0.129778	0.0295997	0.0105347		0.0220091
209	XP_011263888.2-E2ATY3	0.0614757	0	0	0.0667787	0.0523217	0	0	0	0.0183821	0.0205319		0.021949
258	XP_025265926.1-XP_025265925.1-E2B1D6	0	0	0.0608824	0	0.0581513	0.0826838	0	0	0.00838777	0.00934592		0.0219451
184	XP_025263927.1-XP_019885078.1-E2AZT4-XP_011266928.1	0.0227696	0	0.0552988	0	0	0.0915153	0	0	0.0446877	0.00489934		0.0219171
321	XP_011255834.1-XP_011255833.1-XP_011255832.1-E2AD28	0	0	0.0310343	0	0.136569	0	0	0	0.0372492	0.0122743		0.0217126
89	XP_011268819.2	0	0.0370356	0	0	0.140766	0	0	0	0.0355936	0.00324176		0.0216637
210	XP_011266529.1-E2AZ08	0	0	0	0	0	0	0.0471557	0.135366	0.0177105	0.0150136		0.0215246
28	XP_011261898.2	0	0.102911	0.0458627	0.0330414	0	0	0.0162675	0	0.00705882	0.00933339		0.0214475
290	E1ZVC0-XP_011269033.1	0.0903505	0	0.0692647	0	0.0220276	0	0	0	0.0140832	0.0180678		0.0213794
115	XP_011265309.2-E2AWK6	0	0	0	0.13083	0	0.047176	0	0	0	0.0355197		0.0213526
207	E1ZWP8	0	0	0	0.0544538	0	0.0750593	0	0.0572059	0.0177583	0.00738167		0.0211859
409	E2AZV5-XP_025263902.1-E2A2J4	0	0.10786	0	0.0819801	0	0	0	0	0	0.0204883		0.0210328
103	XP_019882595.1-E2A8M9	0	0	0	0.121156	0.05538	0	0	0	0.0174459	0.0104306		0.0204412
163	XP_011260972.1-E2AMV4	0.0595699	0.0391176	0	0.0686832	0	0	0	0	0	0.0364884		0.0203859
95	XP_011259986.1-E2AKV6	0	0.0548004	0.068129	0	0	0	0	0.0698039	0	0.0103346		0.0203068
320	XP_025270750.1-XP_025270749.1-XP_025270592.1-XP_025270591.1-E2AJP1-E2B077-E2AT48	0	0.117608	0	0.0750223	0	0	0	0	0.00489177	0.00325618		0.0200778
362	XP_011260561.2-XP_011260560.2-E2ALY1	0	0	0	0.0820784	0.0509722	0.0323529	0	0	0.0169026	0.0184201		0.0200726
243	E2B1C8-XP_011267643.2	0	0.0381513	0	0.0258292	0	0	0.100821	0	0.0128296	0.0230699		0.0200701
234	XP_011263372.1-XP_011263370.1-E2ASS1	0.0188616	0	0	0	0.032861	0	0.109826	0	0.0373631	0.00146471		0.0200376
285	E2ALU3-XP_019883849.2	0	0.0671827	0.0252866	0	0.077709	0	0	0	0.00431373	0.023783		0.0198275
198	XP_011268873.1-XP_011268841.1-XP_011264343.1-XP_011264339.1-E2AUU5-E2AUU1-E2A0I8-XP_011252166.1-E2A633-E2AGF1-XP_011257651.1-XP_011257652.1	0	0.0670829	0.0458384	0	0	0	0	0	0.0702818	0.0133569		0.019656
123	XP_011268046.1-E2B286	0	0	0.0718803	0	0.0721594	0	0	0	0.0324677	0.0200022		0.019651
69	XP_011252428.1-E2A6N1-XP_025262425.1-XP_011252154.1-XP_011252142.1-E1ZVV0-E1ZVU9-XP_025262454.1-XP_025262453.1-XP_025262452.1-XP_025262451.1	0	0.0586765	0.026685	0	0	0	0.104021	0	0	0.006208		0.019559
291	XP_011269819.1-E2A2D1	0	0.0656134	0	0	0	0.0520773	0.0559791	0	0.0164109	0.00461019		0.0194691
235	XP_025262778.1-XP_025262777.1-XP_025262798.1-E1ZXT8	0	0	0	0.0680896	0.0636603	0.0556373	0	0	0	0.00726159		0.0194649
12	XP_025263076.1	0	0	0	0.0534706	0.0613898	0	0.0163567	0	0.0404796	0.0199831		0.019168
238	E2AMQ8-XP_025265046.1	0.0959223	0	0	0	0	0	0	0.095049	0	0		0.0190971
413	XP_025268334.1-XP_011256430.2-E2AE31	0	0	0	0	0	0	0	0.139093	0.0394489	0.0111231		0.0189665
300	XP_025267081.1-XP_011269145.1-XP_011268884.1-E1ZUV1	0	0.0735956	0	0	0.0906084	0	0	0	0.0136593	0.00768859		0.0185552
100	E2AK04-XP_011259541.1	0.0660744	0	0.0438529	0	0.0216258	0	0	0	0.0359641	0.0164744		0.0183992
220	XP_011257803.1-E2AGQ1	0.0412027	0	0	0.0612418	0.0406863	0	0	0	0.0214732	0.0191976		0.0183802
175	XP_011255562.2	0.0491422	0.0854501	0	0.0241417	0	0	0	0	0.0187041	0.00551161		0.018295
35	XP_011255300.1-E2AC60	0.0216348	0	0	0	0.0244098	0.0367556	0	0.0422601	0.0302833	0.0271145		0.0182458
456	XP_011254364.2-E2AAA4	0	0	0	0.0850577	0	0	0.0956294	0	0	0.00146164		0.0182149
127	E2A2D8	0	0	0	0.106755	0	0	0	0	0.00851765	0.0650315		0.0180304
154	XP_011265213.1-E2AWC1	0.0491264	0.0171917	0	0	0	0	0	0	0.0771807	0.0344782		0.0177977
266	XP_011254456.1-XP_011254455.1-E2AAG3	0	0	0	0	0.103641	0	0	0.0602537	0.00645294	0.00698983		0.0177337
113	XP_025270228.1-E2AA82-E2AA81	0	0.0617361	0.0982711	0	0	0	0	0	0	0.0121788		0.0172186
250	XP_011257276.1-E2AFM8	0	0	0	0	0	0	0.133095	0	0.0337102	0.00380518		0.0170611
408	XP_025269798.1	0	0	0	0	0	0	0.154128	0	0.0100821	0.00608835		0.0170298
427	XP_025263984.1-XP_025263983.1-XP_025263982.1-XP_011252554.1-XP_011252552.1-XP_025263981.1-XP_011252551.1-XP_019882397.1-XP_011252550.1-XP_011252545.2-E2A6V3-XP_011252548.1-XP_025263980.1-XP_011252547.1	0	0	0	0	0.064422	0	0	0.103761	0	0.00145124		0.0169634
13	XP_025264611.1	0	0	0.132072	0	0	0	0	0	0.0153812	0.0218287		0.0169282
72	E2AY06-XP_011266013.1	0	0	0.0212214	0	0	0	0	0.0990782	0.025825	0.019611		0.0165736
256	XP_025267906.1	0	0	0	0	0	0	0.0725	0	0.0493906	0.0424918		0.0164382
350	XP_011263339.1-E2ASN8	0	0	0.0761825	0	0	0	0	0.0742647	0	0.0127694		0.0163217
139	E2ABN0-XP_011255042.2-XP_011255044.1-XP_011255043.1	0	0	0	0.0914118	0	0	0	0	0.0493739	0.0210474		0.0161833
330	XP_011268840.2-E2A0I9-E2A0J0	0	0	0.0963356	0	0	0.0465842	0	0	0.0164623	0.00218293		0.0161565
328	XP_025271421.1-E2APS1	0	0	0.107703	0	0	0	0	0	0.00695321	0.0465209		0.0161178
247	E2AYS3-XP_011266404.2	0.0618869	0	0.0302993	0	0.0532366	0	0	0	0	0.0156726		0.0161095
194	XP_011264385.1	0.0219412	0.0370859	0.0327983	0.0343838	0	0	0	0	0.0296359	0.00442631		0.0160271
76	XP_011256104.1-E2ADN0	0.053125	0	0	0	0.0956217	0	0	0	0	0.00937819		0.0158125
351	XP_025269390.1-XP_025269389.1-XP_025269388.1-E2AYP1-XP_025269385.1-XP_025269384.1-XP_025269383.1-XP_025269382.1-XP_025269386.1	0	0.0803268	0.0592145	0	0	0	0	0	0.00390756	0.00784861		0.0151297
112	XP_011268522.1-E1ZZX0	0	0.0226691	0.0552989	0.0536652	0	0	0	0	0.00507843	0.0129734		0.0149685
454	XP_011258400.1-XP_011258399.1-E2AI07	0	0.0821876	0	0	0	0	0	0	0.0481048	0.0193191		0.0149611
132	XP_025268689.1-E2A0E3-E2A0E2	0	0	0	0	0	0	0	0.127592	0.0143891	0.00445001		0.0146432
452	XP_011264203.1-E2AUL5	0.12376	0	0	0	0	0	0	0	0.0164531	0.00609		0.0146303
63	E2AFL0-XP_011257234.1-XP_011257235.1	0.0245185	0.0199771	0.0277647	0	0.0496691	0	0	0	0.0144609	0.00985466		0.0146245
335	XP_011264587.1-E2AVB1	0.0224627	0.0287365	0	0.0720722	0	0	0	0	0.013519	0.00903614		0.0145827
174	E1ZYQ1-XP_025267158.1-XP_011266637.1-XP_011266629.1-XP_011266622.1	0.0595989	0	0	0.0710505	0	0	0	0	0.00859001	0.00641035		0.014565
333	XP_025267701.1-XP_025267700.1-E2AWG1	0	0	0	0.0931156	0.0496029	0	0	0	0	0		0.0142719
124	XP_025262039.1-XP_025262034.1-XP_025262032.1-XP_025262029.1-E2A1S2-E2AVK5	0	0	0.0665831	0.0275695	0	0	0	0	0.0428875	0.00355732		0.0140597
81	XP_011264690.1-XP_011264688.1-E2AVH4	0.0366757	0	0	0.0472941	0.0363824	0	0	0	0.0109692	0.00919806		0.0140519
162	XP_025268350.1-E2AGJ5-E2AGJ4-REV__XP_019883532.1-REV__E2AI05	0.0494363	0	0	0	0.0460178	0	0	0	0.0187771	0.0239692		0.01382
267	XP_011264946.1-E2AVX1	0	0	0.0485945	0	0.0883427	0	0	0	0	0.000991463		0.0137929
459	E2ACU8-XP_011255731.1-XP_011255730.1-XP_011255729.1-XP_011255728.1-XP_011255727.1-XP_011255725.1-XP_019882977.1	0.0316139	0	0	0.0659722	0	0	0	0	0.0347416	0.00408204		0.013641
223	XP_011258099.1-E2AHG1	0	0	0	0.0332549	0	0.0772653	0	0	0.0134926	0.0122553		0.0136268
125	XP_011266190.1-E2AYB4	0	0	0	0.0618382	0	0.0387165	0	0	0.0258545	0.00920584		0.0135615
417	XP_011254475.1-E2AAH7	0	0	0.134298	0	0	0	0	0	0	0		0.0134298
331	XP_011269026.3-E2A0U6	0	0	0.0556347	0	0.0192567	0	0	0.0183578	0.0223124	0.0183879		0.013395
251	XP_011256281.2-E2ADW9-E2ADX0-XP_025262684.1-XP_025262685.1-XP_025262693.1-E2ADW3	0	0	0	0	0.128215	0	0	0	0	0.00511451		0.0133329
179	E1ZXZ4-XP_011255340.2	0	0	0.0996059	0	0	0	0	0	0.0161529	0.016939		0.0132698
228	XP_011262285.1-E2AQK2-XP_011262284.1	0.0866711	0	0	0	0	0	0	0	0.0259814	0.0199613		0.0132614
148	XP_011250693.1-E2A358	0.0842941	0	0	0	0	0	0	0	0.025835	0.0187962		0.0128925
308	XP_025270282.1-XP_011260493.3	0	0	0	0	0	0	0.123897	0	0	0.00113137		0.0125028
27	XP_025269479.1-E2AJL7	0	0	0	0.0177922	0	0	0.0553337	0.0335294	0	0.0161376		0.0122793
392	XP_011261604.1-XP_011261603.1-XP_011261602.1-XP_011261601.1-XP_019884096.1-E2AP98	0	0	0.0690196	0	0.0199195	0	0	0	0.026465	0.0045573		0.0119961
396	XP_011265379.1-E2AWT0	0.112581	0	0	0	0	0	0	0	0	0.00737303		0.0119954
398	XP_011256968.1-E2AF24	0.0595033	0.0443019	0	0	0	0	0	0	0	0.0160745		0.011988
168	XP_025265142.1-XP_011265088.2-E1ZV36	0	0	0	0.0726401	0.020783	0	0	0	0.0107908	0.0137259		0.011794
275	E2B223-XP_011267952.3	0	0.0430369	0	0.0702614	0	0	0	0	0	0.00383857		0.0117137
135	XP_011257343.1-XP_011257342.1-E2AFQ5	0	0.0476597	0.0449449	0	0.018421	0	0	0	0	0.00607474		0.01171
155	E2A4N5-XP_011251529.2	0	0	0.0777206	0	0	0	0	0	0	0.0393407		0.0117061
384	XP_011253906.1-E2A9D3	0.0294785	0	0.0438971	0	0	0	0	0	0.0364894	0.00504734		0.0114912
259	XP_011265525.1-E2AX16-E2AX15	0.0363725	0	0	0	0.0710155	0	0	0	0	0.00523731		0.0112625
44	XP_011253679.1-E2A8Y6	0	0	0	0	0	0	0.0982812	0	0	0.0140569		0.0112338
219	XP_011262740.1-XP_011262739.1-E2ARI6-XP_011261103.1-E2AN64	0	0.0592122	0	0.0444786	0	0	0	0	0	0.008138		0.0111829
85	XP_025265943.1-E2AGD3	0.0252568	0	0.0157794	0	0	0	0	0	0.0581703	0.0107708		0.0109977
479	XP_011265593.1-XP_011265592.1-E2AX30	0.0942334	0	0	0	0	0	0	0	0.0119	0.00382185		0.0109955
237	XP_011255135.2-E2ABV2	0.0537466	0.0314128	0	0	0	0	0	0	0.00593697	0.016368		0.0107464
20	XP_011259278.2-E2AJM0-E2ANU0	0	0	0	0	0	0.0531767	0	0	0.0335118	0.019934		0.0106622
187	XP_011266934.1-E2AZT6	0.0450368	0	0	0	0	0	0.017657	0.0411176	0	0.00226386		0.0106075
65	XP_011258918.1-E2AIZ6	0	0	0	0.0396633	0	0	0	0	0.0502906	0.0156051		0.0105559
252	XP_011269558.1-E2A1T0-XP_025262014.1	0	0	0	0	0	0.0769626	0	0	0.0117588	0.0167361		0.0105457
304	XP_025263723.1-XP_025263724.1-E2A460	0	0	0.0261403	0	0	0.0688356	0	0	0	0.0101436		0.0105119
84	XP_011255085.1-E2ABQ6	0.0642353	0	0	0	0	0	0	0	0.0204726	0.0201859		0.0104894
318	XP_011256710.2-E1ZWT9	0	0.0855912	0	0	0	0	0	0	0.0127724	0.00624578		0.0104609
286	E2A6U3-XP_011252509.1-XP_011252508.1	0	0	0	0.0502626	0	0	0	0	0.0357421	0.0165465		0.0102551
212	XP_011260887.1-E1ZXK2	0	0	0	0	0	0	0	0.0538749	0	0.0476625		0.0101537
323	E1ZXZ8-XP_011262891.1	0.0625748	0	0	0	0	0	0	0	0.0215163	0.0174247		0.0101516
315	E2AMK0-XP_019883943.1	0	0	0	0	0.0511562	0	0	0.044739	0	0.0042751		0.010017
216	XP_011256323.1-XP_011256322.1-XP_011256321.1-E2ADY7-E2ADY5	0	0	0.0490147	0	0	0	0	0	0.0277511	0.022241		0.00990068
299	XP_011252204.1-E2A665	0	0	0	0.0851029	0	0	0	0	0.00488039	0.00827697		0.00982603
347	XP_011266221.1-E2AYF4-XP_011266222.1	0	0	0	0.0372479	0	0.0501587	0	0	0.00786216	0.00204789		0.00973166
444	XP_011253558.1-E2A8S3	0	0	0	0	0.0186275	0	0	0	0.0176152	0.0606818		0.00969245
200	XP_011253314.1-E2A8B3	0	0	0	0.0794312	0	0	0	0	0.00979887	0.00589527		0.00951253
309	E2ANE4-XP_011261213.1	0.0505588	0	0	0.0411663	0	0	0	0	0	0.00306891		0.0094794
446	XP_011266363.1-XP_011266362.1-XP_011266361.1-E2AYQ6	0	0.048201	0	0	0	0	0	0	0.0255027	0.0210042		0.00947079
226	XP_011251854.1-E2A5C4	0.0913678	0	0	0	0	0	0	0	0	0.00306223		0.009443
93	XP_011254034.1-E2A9P3	0.026232	0	0	0	0.0415425	0	0	0	0.0108691	0.0155385		0.00941821
274	XP_011268460.1-E1ZZT5	0	0	0	0	0.0264106	0.0384412	0	0	0.014812	0.013018		0.00926817
407	XP_011255976.2-E2ADD9	0	0	0	0	0.0813521	0	0	0	0	0.00823349		0.00895856
255	XP_011251061.1-E2A3T5	0	0	0.0489069	0	0	0	0	0	0.0180571	0.0183886		0.00853525
50	XP_025265121.1-E1ZWT6	0	0	0	0	0	0	0	0	0.0568088	0.0284544		0.00852631
268	E2A9Z9-XP_025264106.1-XP_011254200.2-XP_025264105.1-XP_025264104.1	0	0	0	0.0706667	0	0	0	0	0	0.0139467		0.00846133
177	XP_011251109.1-E2A3W4	0.016585	0	0	0	0	0	0	0.0417165	0	0.0256004		0.00839018
467	XP_011263009.1-E2AS00	0	0	0	0	0	0.0802235	0	0	0	0.00290572		0.00831292
0	XP_011252500.2-E2A6T2	0	0	0.0483689	0	0	0	0	0	0.0198658	0.0136865		0.00819211
185	XP_011261154.1-XP_025264083.1-XP_025264079.1-XP_011261152.1-XP_025264076.1-E2ANA9	0	0.0792034	0	0	0	0	0	0	0	0.00192341		0.00811268
488	E2A9H0-XP_025268177.1-XP_025268171.1	0.0733895	0	0	0	0	0	0	0	0	0.00729645		0.0080686
150	XP_011251814.1-E2A5A3	0	0	0	0	0.0741815	0	0	0	0	0.00436655		0.0078548
23	E2ALS8-XP_019883851.2	0	0	0	0	0.0684572	0	0	0	0.00495861	0.00507802		0.00784938
324	XP_011266432.1-E2AYU1	0	0	0	0	0	0.0782353	0	0	0	0		0.00782353
221	XP_011260804.1-E2AMH2	0.0327802	0	0	0.0169079	0.0260355	0	0	0	0	0.00248084		0.00782045
382	XP_011259829.1-E2AKH8	0.0231863	0	0.019359	0	0	0	0	0	0.0291976	0.00643502		0.00781779
393	E2A1E3-XP_011269355.1	0	0	0	0	0.0753907	0	0	0	0	0.00271217		0.00781029
62	XP_025269114.1-XP_025269111.1-XP_025269110.1-XP_025269109.1-XP_025269112.1-XP_025269117.1-XP_025269116.1-XP_025269113.1-XP_025269115.1-E2ARB3-E2AEH5-E2AEH6	0	0.03	0	0	0	0.0257059	0	0	0.0143878	0.0076284		0.0077722
420	XP_011267555.1-E2B171-XP_011267554.1	0	0.0732075	0	0	0	0	0	0	0	0.00444434		0.00776519
439	XP_011263425.1-E2ASS7	0	0	0	0	0.0563708	0	0	0	0.0149442	0.00467631		0.00759914
352	XP_011261151.1-E2ANA8	0	0	0	0	0.0631995	0	0	0	0.0045098	0.0079674		0.00756767
225	XP_019883321.1-E2AG54	0	0	0	0.0394631	0.0187868	0	0	0	0	0.0171491		0.0075399
186	XP_011256209.1-E2ADT4	0	0	0.0464261	0	0	0	0	0	0.0199713	0.00874683		0.00751442
192	E2AV99-XP_011264553.1	0	0	0	0	0	0	0.0649853	0	0	0.00891209		0.00738974
77	XP_025270286.1-E1ZYU0-XP_011261436.3	0	0.0192647	0	0	0	0.0321726	0	0	0.00932689	0.0124059		0.00731702
107	XP_025262735.1-XP_025262733.1	0	0	0	0.060098	0	0	0	0	0.00340686	0.00953553		0.00730404
271	XP_011264753.1-E2AVK0	0	0	0.015681	0	0	0	0	0	0.0386428	0.0184655		0.00727893
451	E2AEX0-XP_011256903.1-XP_011256902.1-XP_011256901.1-XP_025267590.1-XP_025267589.1-XP_025267588.1	0	0	0	0.0386503	0.0333621	0	0	0	0	0		0.00720124
312	XP_025265136.1	0	0	0	0	0	0	0	0	0.0327911	0.0378814		0.00706725
244	XP_011250985.1-XP_011250984.1-E2A3N8	0	0	0	0.0183922	0	0	0.017139	0	0.028995	0.00598225		0.00705085
245	XP_011268722.1-XP_025270978.1-XP_025270976.1-E2A0C4-XP_025270977.1	0	0	0	0	0.0518487	0	0	0	0	0.017965		0.00698137
283	XP_011268669.1-E2A057	0	0.0201142	0	0	0	0	0	0	0	0.0488627		0.00689768
357	XP_025268915.1-XP_011252288.1-XP_011252287.1-E2A6B9	0	0.0251437	0	0	0	0	0	0	0	0.0437021		0.00688458
47	XP_011260079.2-E2AL14	0	0	0	0	0	0	0	0	0.0390459	0.0297546		0.00688005
429	XP_025269497.1	0	0	0	0.0471016	0.0213725	0	0	0	0	0		0.00684742
486	E2AJY8-XP_011259491.1-XP_011259490.1-XP_011259489.1-XP_019883681.2	0	0	0	0	0	0.0642892	0	0	0	0.00320576		0.0067495
292	XP_011251246.1-E2A429-XP_011251245.1-XP_011251244.1	0	0.0487991	0	0	0	0	0	0	0.00942785	0.00881176		0.00670387
316	E2A6U2-XP_011252507.2	0	0.0252941	0	0	0	0	0	0	0.0397807	0.00140306		0.00664779
67	E2ALP2-XP_011260424.1	0	0	0	0	0	0	0	0	0.05622	0.0101124		0.00663324
449	XP_025269140.1	0	0	0	0.0524983	0	0	0	0	0	0.0137298		0.00662281
66	E2AU22-XP_019884578.2	0	0	0	0.0182141	0	0	0	0	0.0230314	0.0246091		0.00658545
236	XP_011255915.1-XP_011255908.1-XP_011255898.1-XP_011255881.1-E1ZWM5	0	0	0	0	0	0	0	0	0.0534336	0.0118665		0.00653001
434	XP_019883158.1-E1ZWT7	0	0	0.060112	0	0	0	0	0	0	0.00344211		0.00635542
80	E2B227-XP_011267964.1	0.0526723	0	0	0	0	0	0	0	0	0.00830399		0.00609763
108	XP_011252356.1-E2A6I4	0	0	0.0512429	0	0	0	0	0	0.0039625	0.00569167		0.00608971
49	XP_011251688.1-E2A4X8	0	0	0	0	0	0.0164032	0	0	0.0185604	0.02591		0.00608736
319	XP_011269444.1-E1ZVE4-XP_011269460.1-XP_011269452.1	0.0240861	0	0.0319608	0	0	0	0	0	0	0.00199081		0.00580377
354	E2AYI3-XP_025268444.1-XP_025268446.1-XP_025268445.1	0	0	0	0	0	0	0	0	0.0450224	0.0128908		0.00579132
440	E2A0Q8-XP_011268952.1	0	0	0	0	0	0.0331895	0	0	0.0134639	0.0107169		0.00573704
426	XP_025270581.1-XP_011269446.2-XP_011269445.2-E2A1K5	0.017995	0	0	0	0	0	0	0	0.0343952	0.00461703		0.00570072
375	XP_011256472.1-XP_011256471.1-E2AE47	0	0	0.0401257	0	0	0	0	0	0.00589916	0.0104915		0.00565163
289	E2ABA5-XP_025269147.1-XP_011254839.1-XP_011254838.1-XP_011254837.1	0	0	0	0	0	0	0	0	0.0239168	0.0301682		0.0054085
411	XP_011269203.1	0	0	0	0	0.0537908	0	0	0	0	0		0.00537908
438	XP_011255975.2-XP_011255974.2-E2ADE0	0	0	0	0.050597	0	0	0	0	0	0.00139045		0.00519874
310	XP_011266198.2-E2AYC1	0	0	0	0	0.0470398	0	0	0	0	0.00346884		0.00505086
55	XP_011262697.2-E2ARG4-E2A6I8-XP_011252363.1-XP_011252362.1	0	0	0	0.0263235	0	0	0	0	0.0201002	0.00261853		0.00490422
172	XP_025268258.1	0	0	0.046705	0	0	0	0	0	0	0.00158834		0.00482934
30	XP_019882306.1-E2A5W9	0	0	0	0	0.0375509	0	0	0	0.00474839	0.00504317		0.00473425
70	XP_011255318.1-XP_011255317.1-E2AC71	0	0	0	0	0.0195938	0	0	0	0.0222637	0.00250525		0.00443628
336	XP_025268998.1	0	0	0	0	0.0179779	0	0	0	0.0245434	0.000904354		0.00434257
110	XP_011268846.1-XP_011265836.1-XP_011264341.1-E2A0J1	0	0	0.0278791	0	0	0	0	0	0	0.0148506		0.00427297
159	XP_011268452.1-E1ZZT0	0	0	0	0.0252031	0	0	0	0	0	0.0159362		0.00411394
233	XP_025264462.1-XP_025264460.1-XP_025264459.1-XP_025264457.1-XP_025264453.1-XP_025264446.1-E2AB22	0	0	0	0	0	0	0	0	0.0328585	0.00817405		0.00410325
465	XP_011264253.1-XP_011264252.1-XP_011264250.1-XP_011264249.1-E2AUK5	0	0	0.0281597	0	0	0	0	0	0.00446036	0.00713631		0.00397563
129	XP_019883740.2-E2AKK9	0	0	0	0	0	0	0	0	0.0201634	0.0169234		0.00370867
327	XP_011251155.1-E2A3Z5	0.0305098	0	0	0	0	0	0	0	0	0.00539357		0.00359034
457	XP_025269261.1-XP_025269260.1-E2AWP0-E2AUY7	0	0	0.0310662	0	0	0	0	0	0	0.00368045		0.00347466
241	E2A3I0-XP_011250877.1-XP_011250876.1-XP_011250875.1-XP_011250874.1	0	0	0	0	0	0	0	0	0.0326393	0.00184364		0.00344829
353	XP_011253726.1-XP_011253725.1-XP_011253724.1-XP_011253723.1-E2A915	0.0225812	0	0	0	0	0	0	0	0	0.0112707		0.00338519
344	XP_025265510.1-XP_019884763.1-XP_011265197.1-XP_011265195.1-XP_019884762.1-XP_019884761.1-XP_011265194.1-XP_011265193.1-XP_011265191.1-XP_011265190.1-XP_011265189.1-E2AWB0	0	0	0	0	0	0	0	0	0.0195015	0.0141103		0.00336118
295	XP_025269642.1-E2AY85	0	0	0	0	0	0	0	0	0.00759152	0.0258066		0.00333981
338	E1ZV08-XP_025271395.1-XP_011260504.1-XP_011260421.1	0	0	0	0	0.0226401	0	0	0	0	0.0089881		0.00316282
374	XP_011251576.1-E2A4R1	0	0	0	0	0	0	0	0	0	0.0301885		0.00301885
460	XP_011255068.1-XP_011255058.1-E1ZWI0	0	0	0.01875	0	0	0	0	0	0.0109693	0		0.00297193
366	XP_025266972.1-XP_011259813.1-E2AKG6	0	0	0	0	0.0196229	0	0	0	0	0.00983086		0.00294538
400	XP_011256502.1-E2AEA4	0	0	0	0	0	0	0	0.0153266	0.00932956	0.00467038		0.00293265
296	XP_011250832.1-E2A3G1	0	0	0	0	0	0	0	0	0.0290341	0		0.00290341
317	XP_011263650.1-E2ATD7	0	0.0204817	0	0	0	0	0	0	0.00551193	0.00272652		0.00287201
402	XP_011261487.1-E2AP46	0	0.0170491	0	0	0	0	0	0	0.00485686	0.00624194		0.0028148
199	XP_025269243.1	0.0229412	0	0	0	0	0	0	0	0.00349265	0.0014156		0.00278494
144	XP_025265691.1-E2AD33	0	0	0	0	0	0	0	0	0.0128559	0.0138599		0.00267158
378	XP_011264067.1-XP_011264068.1-E2AUA4	0	0	0	0	0.0224862	0	0	0	0	0.00379192		0.00262782
495	E2A4H1-XP_025265505.1	0	0	0	0	0	0	0	0	0.0262043	0		0.00262043
334	XP_011261977.1-E2APZ9	0	0	0	0	0.0243529	0	0	0	0	0.00167836		0.00260312
314	XP_011254474.1-E2AAH6	0	0	0	0	0	0	0	0	0.0185717	0.007349		0.00259207
399	XP_011268790.1-XP_011268795.1-XP_011268794.1-XP_011268793.1-E2A0F3-XP_011268792.1-XP_011268791.1	0	0.0206486	0	0	0	0	0	0	0	0.00471152		0.00253601
165	XP_011260686.2-E2AM68-E2AM67	0	0	0	0	0	0	0	0	0.011829	0.0125634		0.00243924
464	XP_011264128.1-E2AUD9-XP_011264127.1	0	0	0	0	0	0	0	0	0.0167509	0.00538855		0.00221394
474	XP_011252120.1-XP_011252111.1-E1ZVU8	0.0176103	0	0	0	0	0	0	0	0	0.00275637		0.00203667
339	E2A9I6-XP_025271362.1	0	0	0	0	0	0	0	0	0.0195681	0		0.00195681
279	E2AIZ4-XP_025262148.1-XP_025262147.1-XP_025262146.1-XP_025262145.1-XP_025262144.1-XP_011258911.1-XP_011258910.1	0	0	0	0	0	0	0	0	0	0.0190818		0.00190818
277	XP_011253192.1-E2A7Z9	0	0	0	0	0	0	0	0	0.0115886	0.0068944		0.0018483
41	E2AQI6-XP_011262241.1-XP_011262243.1-XP_011262250.1-XP_019884226.1-XP_011262249.1-XP_011262248.1-XP_011262247.1-XP_011262246.1-XP_011262245.1-XP_011262244.1	0	0	0	0	0	0	0	0	0.00520833	0.0126349		0.00178432
151	XP_011268273.1-E1ZZF6	0	0	0	0	0	0	0	0	0.00373436	0.0132602		0.00169945
246	XP_011251040.1-XP_011251039.1-XP_011251038.1-E2A3S3-E2A3S0	0	0	0	0	0	0	0	0	0.0103754	0.00656345		0.00169389
278	XP_011251352.1-E2A481	0	0	0	0	0	0	0	0	0.015743	0.00113879		0.00168817
443	XP_011253629.1-E2A8V7	0	0	0	0.0158487	0	0	0	0	0	0.000982005		0.00168307
391	E2AXK1-XP_011265833.1	0	0	0	0	0	0	0	0	0.00404902	0.0124464		0.00164954
230	E2AE72	0	0	0	0	0	0	0	0	0.0125194	0.00340368		0.00159231
269	XP_011252045.1-E2A5M2	0	0	0	0	0	0	0	0	0	0.0152146		0.00152146
395	XP_011252466.1-E2A6R7-XP_011252465.1	0	0	0	0	0	0	0	0	0.00486329	0.0096875		0.00145508
450	XP_011268143.2-E1ZZ63-XP_011268142.2-XP_011268139.2-E1ZZ67-E1ZZ66-XP_011268140.1-XP_011268141.1-E1ZZ65	0	0	0	0	0	0	0	0	0	0.0132635		0.00132635
121	XP_025263040.1-XP_025263125.1-XP_025263071.1	0	0	0	0	0	0	0	0	0.00950327	0.00307062		0.00125739
160	XP_011268535.1-E1ZZZ1	0	0	0	0	0	0	0	0	0	0.0119336		0.00119336
173	XP_019882645.2-E2A931	0	0	0	0	0	0	0	0	0.00949183	0.0023324		0.00118242
264	XP_011254448.1-E2AAF9	0	0	0	0	0	0	0	0	0.00751501	0.00407176		0.00115868
389	XP_011261781.1-XP_011261780.1-E2APK9	0	0	0	0	0	0	0	0	0.0109112	0		0.00109112
422	XP_011251574.1-E2A4R0-XP_011251573.1	0	0	0	0	0	0	0	0	0	0.0103286		0.00103286
447	XP_019882165.2-XP_019882163.2-XP_019882164.2-XP_011251397.2-E2A4D2-XP_011251398.2	0	0	0	0	0	0	0	0	0.00710348	0.00311352		0.0010217
503	XP_011259539.1-E2AK02	0	0	0	0	0	0	0	0	0.00890406	0.00128676		0.00101908
428	XP_025271105.1-XP_025271104.1-XP_025271103.1	0	0	0	0	0	0	0	0	0.00875294	0.000758946		0.000951189
232	E2AME3-XP_011260769.1	0	0	0	0	0	0	0	0	0	0.00860611		0.000860611
380	XP_011269382.1-E2A1F7	0	0	0	0	0	0	0	0	0.00671176	0.000936949		0.000764871
478	XP_011263180.1-XP_011263173.1-E1ZY18	0	0	0	0	0	0	0	0	0.00709935	0		0.000709935
461	XP_011259329.1-E2AJQ0	0	0	0	0	0	0	0	0	0	0.00690992		0.000690992
253	XP_025265208.1-E2AL32	0	0	0	0	0	0	0	0	0	0.00681633		0.000681633
193	XP_011261506.1-E2AP55	0	0	0	0	0	0	0	0	0	0.00660502		0.000660502
404	XP_011258665.1-E1ZX82-XP_011265369.1-E2AWS1	0	0	0	0	0	0	0	0	0	0.00604424		0.000604424
445	XP_011268281.2-E1ZZG1	0	0	0	0	0	0	0	0	0.00572269	0		0.000572269
176	XP_011262653.1-E2ARD3	0	0	0	0	0	0	0	0	0	0.00570048		0.000570048
480	XP_025262732.1-XP_025262731.1-E2ATE8-E2ATE6-REV__E2ACI4-REV__XP_011255486.1	0	0	0	0	0	0	0	0	0.00408859	0.00146444		0.000555302
360	XP_011264968.2-E2AVY1-XP_019884608.2-E2AUE2	0	0	0	0	0	0	0	0	0	0.0053097		0.00053097
195	XP_019884897.1-XP_011265919.1-XP_011265918.1-E2AXQ4-XP_025269153.1-XP_025269152.1	0	0	0	0	0	0	0	0	0.00387255	0.00140196		0.000527451
301	E2AFY9-XP_011257447.1-XP_011257446.1-E2AFY8-XP_025268256.1-XP_025268255.1	0	0	0	0	0	0	0	0	0.00477799	0		0.000477799
157	XP_011268777.2-E2A0E4	0	0	0	0	0	0	0	0	0.00377617	0.000857911		0.000463409
490	XP_011259910.2-E2AKQ7	0	0	0	0	0	0	0	0	0	0.00451471		0.000451471
386	XP_011267731.1-XP_011267723.1-E1ZYZ4	0	0	0	0	0	0	0	0	0	0.00442956		0.000442956
282	XP_011253055.2-E2A7S3	0	0	0	0	0	0	0	0	0	0.00440405		0.000440405
387	XP_011259467.1-E2AJX9-XP_011259465.1	0	0	0	0	0	0	0	0	0	0.00432598		0.000432598
412	XP_019882578.1-XP_011253405.1-XP_011253404.1-XP_011253403.1-E2A8G5	0	0	0	0	0	0	0	0	0.00403884	0		0.000403884
424	XP_011253799.1-XP_011253800.1-XP_011253798.1-XP_011253797.1-XP_011253796.1-E2A949	0	0	0	0	0	0	0	0	0	0.00378318		0.000378318
463	E2AF09-XP_011256937.1	0	0	0	0	0	0	0	0	0	0.00373433		0.000373433
294	XP_011253803.1-E2A952	0	0	0	0	0	0	0	0	0	0.00363763		0.000363763
436	XP_019885551.1-E2A1P1	0	0	0	0	0	0	0	0	0	0.00359981		0.000359981
448	XP_025262700.1-XP_025262698.1-XP_025266100.1-XP_025262697.1-XP_025262696.1-XP_025262695.1-XP_025266099.1-E2ADX2	0	0	0	0	0	0	0	0	0	0.00343487		0.000343487
196	XP_011266262.1-E2AYI4	0	0	0	0	0	0	0	0	0	0.00342235		0.000342235
416	XP_011265328.1-E2AWL6	0	0	0	0	0	0	0	0	0	0.00325286		0.000325286
470	E2AB34-XP_011254761.1-XP_011254760.1-XP_011254759.1	0	0	0	0	0	0	0	0	0	0.00293996		0.000293996
368	E2AP51-XP_011261492.1	0	0	0	0	0	0	0	0	0	0.00286723		0.000286723
405	XP_011254732.1	0	0	0	0	0	0	0	0	0	0.00279487		0.000279487
421	E2AW15	0	0	0	0	0	0	0	0	0	0.00269054		0.000269054
430	XP_011254592.1-XP_011254591.1-XP_011254590.1-E2AAQ1	0	0	0	0	0	0	0	0	0	0.00248437		0.000248437
355	E2AJP0-XP_025266586.1	0	0	0	0	0	0	0	0	0	0.00231577		0.000231577
376	XP_011250886.1	0	0	0	0	0	0	0	0	0	0.00207696		0.000207696
276	E1ZWT5	0	0	0	0	0	0	0	0	0	0.00171078		0.000171078
227	XP_011254980.1-XP_011254979.1-E2ABH4-XP_011254978.1-XP_011254977.1	0	0	0	0	0	0	0	0	0	0.00162059		0.000162059
471	XP_011262896.1-E2ART6	0	0	0	0	0	0	0	0	0	0.0016156		0.00016156
388	E2AMK3-XP_011260854.3	0	0	0	0	0	0	0	0	0	0.00114338		0.000114338
381	XP_025268059.1-XP_025268060.1-XP_011267296.2-E2AHZ0-E2AHY9-E2B0N7-E2AHZ2-E2AHZ1	0	0	0	0	0	0	0	0	0	0.00112723		0.000112723
270	XP_019883361.1-XP_019883360.1-E2AGJ7-XP_011257718.1	0	0	0	0	0	0	0	0	0	0.001031		0.0001031
455	XP_011255231.1-E2ABZ6	0	0	0	0	0	0	0	0	0	0.00101322		0.000101322
415	XP_025264071.1-XP_025264070.1-XP_011255071.1-E2ABP4	0	0	0	0	0	0	0	0	0	0.000958333		9.58333e-05
406	XP_011258211.1-E2AHR4	0	0	0	0	0	0	0	0	0	0.000819874		8.19874e-05
383	XP_011250989.1-E2A3P2	0	0	0	0	0	0	0	0	0	0.000691241		6.91241e-05
403	XP_011255476.1-XP_011255475.1-XP_011255474.1-E2ACH8	0	0	0	0	0	0	0	0	0	0.000630515		6.30515e-05
180	E2ABI5	0	0	0	0	0	0	0	0	0	0		0
222	XP_011254975.1-E2ABH3	0	0	0	0	0	0	0	0	0	0		0
263	XP_019884886.1-XP_011265840.1-E2AXL2	0	0	0	0	0	0	0	0	0	0		0
281	XP_011253560.1-XP_011253559.1-E2A8S5	0	0	0	0	0	0	0	0	0	0		0
284	XP_011259113.1-E2AJB5	0	0	0	0	0	0	0	0	0	0		0
293	XP_019884752.1-XP_011265107.1-E2AW51-E2AW54	0	0	0	0	0	0	0	0	0	0		0
311	XP_025262168.1-XP_011254489.2-E2AAI3	0	0	0	0	0	0	0	0	0	0		0
313	XP_011267949.1-E2B222	0	0	0	0	0	0	0	0	0	0		0
322	XP_011259060.1-E2AJ86	0	0	0	0	0	0	0	0	0	0		0
340	E2A162-XP_011269204.1	0	0	0	0	0	0	0	0	0	0		0
349	XP_011264487.1-E2AV36	0	0	0	0	0	0	0	0	0	0		0
361	XP_011268673.2-E2A062	0	0	0	0	0	0	0	0	0	0		0
363	XP_011251474.1-E2A4J2	0	0	0	0	0	0	0	0	0	0		0
364	E2AQ44-XP_011262046.1	0	0	0	0	0	0	0	0	0	0		0
367	XP_011254716.1-E2AB03	0	0	0	0	0	0	0	0	0	0		0
369	XP_011263368.1-E2ASR9	0	0	0	0	0	0	0	0	0	0		0
372	XP_011261435.1-E1ZXN9	0	0	0	0	0	0	0	0	0	0		0
397	XP_011255877.1-E2AD64	0	0	0	0	0	0	0	0	0	0		0
410	XP_011269303.2-XP_011269302.2-XP_011269301.2-XP_011269299.2	0	0	0	0	0	0	0	0	0	0		0
414	XP_025269698.1-E2AYW7-E2AYW6	0	0	0	0	0	0	0	0	0	0		0
418	E1ZZJ4-XP_011268367.1-XP_025268277.1-XP_011268365.1	0	0	0	0	0	0	0	0	0	0		0
425	XP_011261314.1-E1ZXM8	0	0	0	0	0	0	0	0	0	0		0
431	E2AVZ2-XP_025264825.1	0	0	0	0	0	0	0	0	0	0		0
432	XP_011260463.1-E2ALK0	0	0	0	0	0	0	0	0	0	0		0
435	E2AX13	0	0	0	0	0	0	0	0	0	0		0
437	XP_011265325.1-XP_011265324.1-E2AWL4	0	0	0	0	0	0	0	0	0	0		0
441	XP_025263257.1-E2AKU5-E2AKU6	0	0	0	0	0	0	0	0	0	0		0
442	XP_025270242.1-XP_011266579.1-XP_011266577.1-XP_011266576.1-XP_011266574.1-XP_011266573.1-E2AZ31-XP_025270240.1-XP_011266571.1	0	0	0	0	0	0	0	0	0	0		0
458	XP_025267422.1-XP_011268639.1-XP_011268638.1-XP_011268637.1-XP_011268636.1-XP_011268635.1-E2A040	0	0	0	0	0	0	0	0	0	0		0
462	XP_011262105.1-E2AQ84	0	0	0	0	0	0	0	0	0	0		0
466	XP_011265518.2-E2AX17	0	0	0	0	0	0	0	0	0	0		0
468	XP_025268062.1-XP_011263604.1-XP_011263603.1-XP_011263602.1-E2ATA4	0	0	0	0	0	0	0	0	0	0		0
469	XP_025268731.1-XP_025270891.1-XP_025265358.1	0	0	0	0	0	0	0	0	0	0		0
473	XP_019883837.1-E2ALL5	0	0	0	0	0	0	0	0	0	0		0
475	XP_011255161.1-XP_011255160.1-E2ABW5	0	0	0	0	0	0	0	0	0	0		0
476	XP_011268699.2-XP_011268698.2-E2A097-E2A096-E2AR74-XP_025264019.1-XP_011268697.2	0	0	0	0	0	0	0	0	0	0		0
477	XP_011266509.1	0	0	0	0	0	0	0	0	0	0		0
481	XP_011253128.1-E2A7Y2	0	0	0	0	0	0	0	0	0	0		0
482	XP_011254292.1-E2AA51	0	0	0	0	0	0	0	0	0	0		0
483	E2AD19-XP_011255813.2-XP_025265625.1	0	0	0	0	0	0	0	0	0	0		0
484	XP_019882541.1-E2A827	0	0	0	0	0	0	0	0	0	0		0
485	E2AP99-XP_011261605.2	0	0	0	0	0	0	0	0	0	0		0
487	XP_011252069.2-E2A5S9-E2A5S6	0	0	0	0	0	0	0	0	0	0		0
489	XP_011254690.1-XP_011254689.1-XP_011254688.1-XP_011254687.1-E2AAW9-XP_025271158.1	0	0	0	0	0	0	0	0	0	0		0
491	XP_025269281.1	0	0	0	0	0	0	0	0	0	0		0
492	XP_011258637.1-E2AIH6	0	0	0	0	0	0	0	0	0	0		0
493	XP_025270484.1-XP_011267484.1	0	0	0	0	0	0	0	0	0	0		0
494	E2AY08-XP_025269779.1	0	0	0	0	0	0	0	0	0	0		0
496	E2A6H4	0	0	0	0	0	0	0	0	0	0		0
497	XP_011259014.1-E2AJ62	0	0	0	0	0	0	0	0	0	0		0
498	XP_011265549.1-E2AX72	0	0	0	0	0	0	0	0	0	0		0
499	XP_025264561.1-XP_025264562.1	0	0	0	0	0	0	0	0	0	0		0
500	E1ZYX6-XP_025268105.1-XP_011267329.1-XP_019884989.1-XP_019884987.1	0	0	0	0	0	0	0	0	0	0		0
501	XP_011269826.1-E2A2D3-XP_011269825.1-XP_011269824.1	0	0	0	0	0	0	0	0	0	0		0
502	E2AMU0-XP_011260960.1-XP_011260959.1	0	0	0	0	0	0	0	0	0	0		0
504	XP_011269400.1-E2A1H1	0	0	0	0	0	0	0	0	0	0		0
505	XP_011251816.2-E2A5A6	0	0	0	0	0	0	0	0	0	0		0
506	XP_011263221.1	0	0	0	0	0	0	0	0	0	0		0
507	XP_011264788.2-XP_025265583.1-XP_019884711.1-XP_011264789.1-XP_019884710.1-XP_011264791.1-XP_011264783.2-XP_011264786.1-XP_011264785.1-E2AVQ2-XP_011264782.1	0	0	0	0	0	0	0	0	0	0		0
508	XP_011262424.1-E2AQY5	0	0	0	0	0	0	0	0	0	0		0
509	XP_011256604.1-E2AEC2	0	0	0	0	0	0	0	0	0	0		0
510	XP_025271294.1	0	0	0	0	0	0	0	0	0	0		0
511	XP_025266938.1-XP_025266937.1	0	0	0	0	0	0	0	0	0	0		0
512	XP_025263893.1-XP_011264552.1-E2AV98	0	0	0	0	0	0	0	0	0	0		0
513	XP_011265967.1-E2AXV8	0	0	0	0	0	0	0	0	0	0		0
514	XP_025267687.1-E2AWE3	0	0	0	0	0	0	0	0	0	0		0
515	XP_025268117.1	0	0	0	0	0	0	0	0	0	0		0
516	E2A701	0	0	0	0	0	0	0	0	0	0		0
517	XP_019885069.1-E2AZP4-E2AZP6	0	0	0	0	0	0	0	0	0	0		0
518	XP_011254794.1	0	0	0	0	0	0	0	0	0	0		0

## Sheet: RF - NvF
	Accuracy	1	0.875	0.875	1	1	0.875	0.875	0.875	0.875	1		0.925
seed		10	11	12	13	14	15	16	17	18	19
	col_name	feature_importance_vals	feature_importance_vals	feature_importance_vals	feature_importance_vals	feature_importance_vals	feature_importance_vals	feature_importance_vals	feature_importance_vals	feature_importance_vals	feature_importance_vals
48	XP_011255281.1;E2AC28;E2AC29	0.490477	0.56453	0.426351	0.541434	0.935563	0.809232	0.468122	0.651181	0.726111	0.488201		0.61012
293	XP_019884752.1;XP_011265107.1;E2AW51;E2AW54	0.503142	0.780823	0.717214	0.485261	0.736312	0.747419	0.599352	0.482279	0.374131	0.413853		0.583979
209	XP_011263888.2;E2ATY3	0.384722	0.408791	0.368194	0.405886	0.404822	0.299047	0.669181	0.61998	0.572603	0.667933		0.480116
237	XP_011255135.2;E2ABV2	0.630365	0.822162	0.201306	0.377068	0.548359	0.292296	0.58701	0.519613	0.318186	0.487856		0.478422
35	XP_011255300.1;E2AC60	0.321108	0.700023	0.507502	0.177958	0.226481	0.49596	0.615618	0.603365	0.542114	0.438425		0.462855
65	XP_011258918.1;E2AIZ6	0.177726	0.422251	0.463973	0.323928	0.310592	0.259237	0.302181	0.458997	0.453816	0.431783		0.360448
140	XP_011267179.1;E2B0D3	0.304855	0.510549	0.302482	0.390518	0.1712	0.469323	0.321324	0.425137	0.202024	0.461133		0.355854
80	E2B227;XP_011267964.1	0.321666	0.308704	0.239424	0.340922	0.251012	0.245956	0.341881	0.268981	0.291134	0.728993		0.333867
22	XP_025269812.1	0.418817	0.201463	0.246703	0.171098	0.486313	0.385611	0.310092	0.279215	0.284747	0.36036		0.314442
39	XP_025262246.1	0.364414	0.396484	0.334257	0.244717	0.488578	0.160945	0.346093	0.309071	0.271356	0.178341		0.309426
259	XP_011265525.1;E2AX16;E2AX15	0.387742	0.289331	0.422366	0.180073	0.428903	0.312126	0.197472	0.0572968	0.434325	0.347931		0.305757
298	E2A8M5;XP_025269992.1	0.275444	0.36491	0.270392	0.0897384	0.111585	0.189552	0.452388	0.242798	0.734917	0.24941		0.298113
233	XP_025264462.1;XP_025264460.1;XP_025264459.1;XP_025264457.1;XP_025264453.1;XP_025264446.1;E2AB22	0.401421	0.167716	0.329124	0.125279	0.555003	0.363418	0.0977516	0.120505	0.188193	0.418301		0.276671
407	XP_011255976.2;E2ADD9	0.0737255	0.245429	0.355685	0.450808	0.17783	0.127161	0.365023	0.248632	0.323869	0.220493		0.258866
69	XP_011252428.1;E2A6N1;XP_025262425.1;XP_011252154.1;XP_011252142.1;E1ZVV0;E1ZVU9;XP_025262454.1;XP_025262453.1;XP_025262452.1;XP_025262451.1	0.150325	0.4163	0.22809	0.329603	0.142826	0.220344	0.168071	0.221574	0.176243	0.39557		0.244895
127	E2A2D8	0.195249	0.300127	0.276895	0.197416	0.120902	0.293544	0.189334	0.157198	0.420651	0.243574		0.239489
19	XP_025269485.1;XP_025269481.1;E2A1Y6	0.178746	0.36093	0.288534	0.289941	0.199738	0.289901	0.176895	0.143107	0.24314	0.216399		0.238733
88	XP_011267538.1;E2B155	0.240489	0.141852	0.300034	0.383189	0.153909	0.209697	0.0786666	0.294599	0.267183	0.243758		0.231338
112	XP_011268522.1;E1ZZX0	0.267737	0.0930666	0.149799	0.127288	0.197552	0.5654	0.0845794	0.214207	0.29963	0.194931		0.219419
114	XP_011260763.1;E2AMD6;XP_011260762.1	0.192299	0.181266	0.125229	0.392293	0.194702	0.162038	0.0556321	0.138901	0.10111	0.39943		0.19429
40	XP_011267533.1;XP_011267532.1;XP_011267531.1;E2B153	0.181891	0.164878	0.140295	0.336324	0.140863	0.204062	0.0629008	0.379348	0.144235	0.093677		0.184847
98	XP_011260780.1;E1ZXJ7	0.211374	0.0867575	0.0595449	0.0837397	0.199608	0.154501	0.292455	0.151987	0.419692	0.186576		0.184624
175	XP_011255562.2	0.100541	0.473834	0.363928	0.188524	0.112788	0.036881	0.131213	0.133408	0.165497	0.105216		0.181183
134	XP_011266818.1;E2AZK6;XP_011266817.1	0.0264671	0.100343	0.121187	0.107812	0.148693	0.0354429	0.324342	0.414237	0.397361	0.0565322		0.173242
16	XP_025262760.1;E2ATD2	0.157188	0.341147	0.0627917	0.167158	0.16924	0.128686	0.16414	0.248155	0.111215	0.173412		0.172313
51	XP_011269703.1;XP_011269702.1;E2A252;XP_011257369.1;XP_011257368.1;XP_011257367.1;E2AFT7	0.105307	0.26084	0.300109	0.177923	0.049762	0.0583928	0.193323	0.23675	0.150139	0.169022		0.170157
300	XP_025267081.1;XP_011269145.1;XP_011268884.1;E1ZUV1	0.319531	0.337131	0.0927088	0.107644	0.123497	0	0.13529	0.155838	0.186384	0.125811		0.158383
243	E2B1C8;XP_011267643.2	0.173678	0.0518805	0.112238	0.110395	0.343464	0.13661	0.13204	0.111699	0.316781	0.0543607		0.154315
372	XP_011261435.1;E1ZXN9	0.149283	0.0470983	0.0746865	0.0467229	0.259376	0.119405	0.101295	0.239839	0.346297	0.0830793		0.146708
24	XP_025264610.1	0.150399	0.122703	0.0798354	0.0789484	0.208272	0.0880754	0.259318	0.226603	0.0217162	0.219606		0.145548
49	XP_011251688.1;E2A4X8	0.116312	0.163796	0.124615	0.112916	0.112663	0.114166	0.183295	0.154003	0.175662	0.175027		0.143246
78	XP_011256478.1;E2AE51	0.168497	0.182804	0.142602	0.103165	0.179675	0.0109798	0.255114	0.289732	0.0287482	0.0680334		0.142935
60	XP_019884394.1;XP_011262974.1;E2ARX6	0.128636	0.0195272	0.191637	0.449283	0.0773143	0.0832386	0.059406	0.0826912	0.1479	0.172865		0.14125
229	XP_025264147.1	0.155798	0.0450584	0.170977	0.169589	0.261407	0.242757	0.0904531	0.0789972	0.126908	0.0642855		0.140623
164	XP_011261637.1;E2APC4	0.0315355	0.0522363	0.133942	0.316075	0.327854	0.0957429	0.0168629	0.108104	0.145634	0.154558		0.138254
97	XP_025267301.1;E2B0F9;XP_025264883.1;XP_025264884.1;E1ZYR2	0.202995	0.110586	0.112565	0.0901631	0.150764	0.204598	0.134207	0.086819	0.143452	0.121219		0.135737
5	XP_011255282.1;E2AC27	0.142785	0.0417166	0.127882	0.0415973	0.0382946	0.106137	0.399714	0.280483	0.0826421	0.0836817		0.134493
68	XP_011268594.2	0.208599	0.146198	0.1331	0.183322	0.180763	0.051927	0.129979	0.13303	0.0706197	0.105527		0.134306
103	XP_019882595.1;E2A8M9	0.0606904	0.282246	0.0680545	0.0541252	0	0.160652	0.0993639	0.428953	0.0564974	0.0708872		0.128147
198	XP_011268873.1;XP_011268841.1;XP_011264343.1;XP_011264339.1;E2AUU5;E2AUU1;E2A0I8;XP_011252166.1;E2A633;E2AGF1;XP_011257651.1;XP_011257652.1	0.0998423	0.0692302	0.120568	0.158273	0.103976	0.185856	0.0757076	0.0481785	0.176968	0.231188		0.126979
168	XP_025265142.1;XP_011265088.2;E1ZV36	0.134782	0.0850319	0.0791532	0.108091	0.047803	0.216093	0.13207	0.109748	0.0939608	0.241483		0.124822
67	E2ALP2;XP_011260424.1	0.0838147	0.115841	0.116411	0.112267	0.24428	0.0743582	0.218773	0.113593	0.0799497	0.0812863		0.124057
72	E2AY06;XP_011266013.1	0.329129	0.180093	0.116165	0.0504025	0.171783	0.0318571	0.0779397	0.152596	0.061564	0.068707		0.124024
75	XP_011267122.2;XP_011267116.2;XP_011267109.2;XP_011267102.2;XP_011267093.2;XP_011267131.3;E1ZYU8	0.17367	0.0672731	0.0672537	0.0619435	0.0425257	0.130632	0.251882	0.207689	0.0409402	0.178644		0.122245
330	XP_011268840.2;E2A0I9;E2A0J0	0.235951	0.16061	0.1324	0.173016	0.0778839	0.209081	0.0100282	0.0962901	0.0851009	0.0276728		0.120803
15	XP_011266010.1;E2AY02	0.0410208	0.109213	0.0457459	0.0909599	0.139398	0.0573472	0.341123	0.091744	0.114622	0.173005		0.120418
61	XP_025263365.1	0.0962436	0.184196	0.129916	0.112933	0.0468008	0.119495	0.1524	0.153416	0.147753	0.0571217		0.120028
390	XP_011251312.2;E2A452	0.103063	0.143226	0.190944	0.243194	0.0238539	0.0860606	0.00631887	0.0949805	0.153581	0.145268		0.119049
74	XP_011264892.1;XP_011264890.1;E2AVV1	0.11923	0.0380269	0.149267	0.0758863	0.123762	0.0720537	0.311028	0.122134	0.0695235	0.0699537		0.115087
302	XP_011269506.1;E2A1Q0	0.017022	0.0988773	0.173559	0.140785	0.134762	0.0711822	0.257215	0.0159715	0.0605497	0.167926		0.113785
34	XP_025269201.1;XP_025269204.1;XP_025269202.1;XP_025269214.1;XP_025269200.1;XP_025269199.1;XP_025269198.1;XP_025269197.1;XP_025269196.1;XP_025269195.1;XP_025269194.1;XP_025269193.1;XP_025269192.1;XP_025269191.1;XP_025269189.1;XP_025269188.1;XP_025269187.1;XP_025269186.1;XP_025269185.1;XP_025269184.1;XP_025269183.1;XP_025269182.1;XP_025269181.1;XP_025269180.1;XP_025269179.1;XP_025269178.1;XP_025269…	0.180502	0.100945	0.0767238	0.139057	0.0706109	0.126378	0.0865272	0.0680599	0.13285	0.0989935		0.108065
100	E2AK04;XP_011259541.1	0.0101711	0.0514733	0.0479216	0.289147	0.122666	0.164686	0.0252841	0.140998	0.0445611	0.150201		0.104711
57	E2AX18;XP_011265519.1;XP_011265517.1	0.0431736	0.0795949	0.115531	0.130212	0.035663	0.0619164	0.232237	0.0935035	0.121836	0.090599		0.100427
170	XP_011255648.1;E2ACR5	0.121389	0.00939236	0.131285	0.155796	0.178117	0.158138	0.034071	0.00705472	0.0542212	0.154251		0.100372
371	XP_025269141.1	0.123106	0.0564925	0.209806	0.0583723	0	0.0655409	0.181982	0.118217	0.111914	0.072227		0.0997658
348	XP_025269663.1;XP_025269662.1;XP_025269661.1;XP_025269660.1;E2A1Z0;XP_025269664.1	0.0601033	0.174511	0.134218	0.118422	0.068905	0.0861896	0.0482592	0.08966	0.107772	0.101448		0.0989489
177	XP_011251109.1;E2A3W4	0.104169	0.0418506	0.058307	0.121861	0.121213	0.130663	0.0673992	0	0.105734	0.22085		0.0972047
9	E2AZ59;XP_011266628.1	0.147132	0.105841	0.0181757	0.0785252	0.0983106	0.0620493	0.249566	0.135128	0.0366491	0.004019		0.0935396
166	XP_011257750.1;E2AGM0;E2A8L3;XP_011253498.1	0.0600394	0.123009	0.14336	0.047505	0.0472728	0.0343763	0.136052	0.0656294	0.11752	0.149048		0.0923812
235	XP_025262778.1;XP_025262777.1;XP_025262798.1;E1ZXT8	0.0832459	0.159236	0.12725	0.130498	0.0676231	0.0686967	0.144902	0.0664222	0.0290776	0.0431221		0.0920074
430	XP_011254592.1;XP_011254591.1;XP_011254590.1;E2AAQ1	0.102361	0.0629407	0.114469	0.0924009	0.0949013	0.0886766	0.0994513	0.11397	0.108246	0.0407608		0.0918177
86	XP_011259459.2;E2AJX6	0.0596473	0.0710178	0.105583	0.124407	0.0603078	0.11656	0.0611538	0.110146	0.0448109	0.15461		0.0908243
55	XP_011262697.2;E2ARG4;E2A6I8;XP_011252363.1;XP_011252362.1	0.0642316	0.006125	0.022277	0.0284189	0.131491	0.0479785	0.0386448	0.444209	0.0626762	0.0468356		0.0892888
194	XP_011264385.1	0.0756641	0.039409	0.110595	0.116235	0.0854011	0.127135	0.128987	0.0563814	0.0667012	0.0851113		0.0891621
268	E2A9Z9;XP_025264106.1;XP_011254200.2;XP_025264105.1;XP_025264104.1	0.14526	0.135549	0.0646106	0.0485117	0.0716696	0.0585295	0.0586526	0.101281	0.127522	0.0733442		0.088493
3	XP_011259281.2	0.0622203	0.124638	0.0705828	0.103191	0.0711054	0.0344406	0.157389	0.0895732	0.0429392	0.127022		0.0883101
0	XP_011252500.2;E2A6T2	0.146265	0.162046	0.0789615	0.0186966	0.142039	0.0380497	0.10204	0.078564	0.0241933	0.0890803		0.0879935
33	XP_025262946.1;XP_019882428.1;XP_019882427.1;XP_019882425.1;XP_019882423.1;XP_019882399.1;XP_019882376.1;XP_025262953.1;XP_025262951.1;XP_025262949.1;XP_025262945.1;XP_025262944.1;XP_025262943.1;XP_019882419.1;XP_019882418.1;XP_019882409.1;XP_019882401.1;XP_019882400.1;XP_019882398.1;XP_019882396.1;XP_019882393.1;XP_019882391.1;XP_019882383.1;XP_019882380.1;XP_019882377.1;XP_019882375.1;XP_025262…	0.0413675	0.0668132	0.0623292	0.109704	0.0572821	0.0701159	0.138565	0.0241564	0.0989807	0.20257		0.0871884
28	XP_011261898.2	0.0749939	0.11069	0.0931506	0.0507128	0.0517257	0.11336	0.104001	0.0680195	0.0877183	0.0884643		0.0842836
38	E2AJL8	0.178627	0.0585675	0.0497716	0.0440482	0.0705223	0.0956316	0.0752067	0.0988494	0.0635872	0.0963696		0.0831181
92	XP_019882849.1;E2AB23	0.0698696	0.0350858	0.0789914	0.0714105	0.353466	0.0229859	0.0305664	0.0507943	0.0692045	0.0460233		0.0828398
23	E2ALS8;XP_019883851.2	0.038877	0.0645135	0.0593514	0.100945	0.103111	0.0875843	0.102886	0.134448	0.0259842	0.0943687		0.0812068
4	XP_011266069.1;E2AY28	0.0988911	0.0816615	0.0226125	0.0242338	0.180037	0.0426278	0.0386234	0.0826305	0.0804642	0.15698		0.0808762
113	XP_025270228.1;E2AA82;E2AA81	0.0867048	0.0312717	0.154405	0.0619399	0.142413	0.0498828	0.0231848	0.0661483	0.105722	0.0870308		0.0808704
297	E2ARB2;XP_011262616.1;XP_011262620.1;XP_019884311.1;XP_019884310.1;XP_019884308.1;XP_019884307.1;XP_019884306.1;XP_011262619.1	0.128659	0.0749106	0.154423	0.085391	0.176932	0	0.00475	0.0186334	0.0477606	0.115993		0.0807453
135	XP_011257343.1;XP_011257342.1;E2AFQ5	0.0315944	0.00824286	0.0949169	0.0746188	0.0811569	0.0741484	0.0410786	0.112075	0.189298	0.0822454		0.0789375
89	XP_011268819.2	0.115903	0.0867883	0.0703483	0.0214263	0.0239231	0.0460294	0	0.0399556	0.239149	0.081121		0.0724644
132	XP_025268689.1;E2A0E3;E2A0E2	0.106469	0.0910392	0.068648	0.0351544	0.0920526	0.11988	0.0646312	0.078978	0.0481796	0.0114148		0.0716446
90	XP_011259751.1;E2AKD6	0.127461	0.19876	0.0965146	0.0384349	0.0269471	0.0161514	0.0602376	0.071162	0.0381918	0.0294473		0.0703308
183	XP_011262417.1;E2AQX7;CON__ENSEMBL:ENSBTAP00000025008	0.0835596	0.162603	0.06767	0.0953776	0.0263433	0.0708636	0.0192181	0.0532564	0.0806622	0.0416932		0.0701247
128	XP_011251922.1;XP_011251921.1;E2A5G4	0.0896032	0.0879133	0.0621138	0.0308414	0.038585	0.119333	0.127142	0.0473942	0.0614302	0.0097563		0.0674112
344	XP_025265510.1;XP_019884763.1;XP_011265197.1;XP_011265195.1;XP_019884762.1;XP_019884761.1;XP_011265194.1;XP_011265193.1;XP_011265191.1;XP_011265190.1;XP_011265189.1;E2AWB0	0.0429927	0.0736672	0.148389	0.0360209	0.00326023	0.131977	0.102269	0	0.0843106	0.0442185		0.0667106
83	XP_025265223.1;XP_025265222.1;XP_025265221.1	0.122341	0.0408839	0.0812364	0.0995604	0.0627433	0.0676445	0.0273705	0.0290267	0.0515736	0.0818886		0.0664269
71	XP_011254210.2;XP_011254209.2;E2AA04	0.028817	0.0632239	0.108446	0.105773	0.0765144	0.0731922	0.0606234	0.0565228	0.0470463	0.0386093		0.0658768
136	XP_011261310.1;XP_011261309.1;XP_011261308.1;XP_011261307.1;XP_011261306.1;E2ANL8	0.0501937	0.0666731	0.0129265	0.0235611	0.0590538	0.0597724	0.228465	0.0572509	0.0331086	0.0606015		0.0651607
125	XP_011266190.1;E2AYB4	0.0313748	0.078972	0.0107976	0.0166737	0.00391827	0.109911	0.0982949	0.0356234	0.0381424	0.21588		0.0639589
96	XP_025266940.1;XP_019883729.1;E2AKF6	0.0190283	0.13717	0.110727	0.0491676	0.0219597	0.0640595	0.0278224	0.0592299	0.0754374	0.0556855		0.0620287
13	XP_025264611.1	0.0261344	0.0517975	0.0818684	0.115268	0.0506752	0.013708	0.133468	0.0477005	0.0177336	0.0674472		0.0605801
10	XP_025266319.1;E1ZXZ5;E2AC93	0.0686223	0.118785	0.0237542	0.0395249	0.0112191	0.061902	0.00660919	0.0767232	0.0807206	0.102672		0.0590533
25	E2AC94	0.0548391	0.0385252	0.0509131	0.0560478	0.0534851	0.143618	0.0512791	0.0938433	0.0305073	0.0143159		0.0587374
189	XP_019884913.1;XP_011266002.1;E2AY00	0.165482	0.0534168	0.0408838	0.0976502	0.0896083	0.116512	0	0	0	0.0236936		0.0587246
93	XP_011254034.1;E2A9P3	0.0697698	0.0181257	0.12099	0.053977	0.0376421	0.0433873	0.0339	0.0125388	0.117165	0.0714821		0.0578977
169	E2A6W8;XP_011252591.1	0.0718763	0.0303816	0	0.114404	0.0594161	0.0639868	0.0173483	0.143369	0.0248338	0.0497002		0.0575316
76	XP_011256104.1;E2ADN0	0.0655136	0.0234222	0.297383	0.0627512	0.0307624	0.0187752	0.00690513	0.0186162	0.0195663	0.0293494		0.0573045
6	XP_011257802.2;XP_011257800.2	0.0482389	0.0320739	0.0618289	0.0530383	0.0589391	0.00401809	0.116049	0.107909	0.016549	0.0541241		0.0552768
353	XP_011253726.1;XP_011253725.1;XP_011253724.1;XP_011253723.1;E2A915	0.064516	0	0.0408571	0.0488837	0.00491458	0.0451958	0.0595528	0.0241488	0.0265536	0.225527		0.0540149
123	XP_011268046.1;E2B286	0.0736898	0.0380254	0.157647	0.050113	0.0451738	0.0627216	0.0612443	0.0202863	0.0208272	0.00876082		0.0538489
7	XP_011252932.2;E2A7K7	0.0357872	0.0947893	0.0538767	0.0809306	0.0649373	0.0717793	0.0257159	0.0127948	0.0585517	0.0335099		0.0532673
44	XP_011253679.1;E2A8Y6	0.0432516	0.052424	0.0724913	0.1029	0.0613348	0.0705607	0.0225687	0.00531794	0.0798519	0.011773		0.0522474
109	XP_025268048.1	0.0478317	0.115708	0.0395786	0.0331446	0.109847	0.0574371	0.0325114	0.0334285	0.0348199	0.0180093		0.0522315
325	XP_025266889.1;E2A031	0.0251668	0.0628912	0.0324887	0.0804292	0.0352216	0.0528947	0.0812091	0.0543867	0.029625	0.0569459		0.0511259
291	XP_011269819.1;E2A2D1	0.0337364	0.021755	0.117601	0.187548	0.0262579	0.0216832	0.0115958	0.00944655	0.0284102	0.0518191		0.0509853
111	XP_011263402.1;E1ZY32	0.11573	0.0460323	0.0728425	0.0632072	0.0147378	0.0485198	0.0248953	0.0224346	0.0164677	0.0825438		0.0507411
70	XP_011255318.1;XP_011255317.1;E2AC71	0.037206	0.0583032	0.0340062	0.0276086	0.0752892	0.0689723	0.0251049	0.0136071	0.137954	0.028572		0.0506623
241	E2A3I0;XP_011250877.1;XP_011250876.1;XP_011250875.1;XP_011250874.1	0.0611739	0.0476577	0.0553663	0.029133	0.0312183	0.0639491	0.0242762	0.0196458	0.0985899	0.0665076		0.0497518
20	XP_011259278.2;E2AJM0;E2ANU0	0.0595954	0.0508135	0.0252852	0.0490204	0.0487234	0.0421444	0.102521	0.0972139	0.00661111	0.01281		0.0494738
203	XP_025269686.1;XP_011266030.1;E2AY69	0.026582	0.114439	0.0754965	0.0214204	0.0183568	0.00971517	0.0918161	0.0554401	0.0289915	0.0496143		0.0491872
208	XP_025268061.1;XP_011260793.1;E2AMG4	0.0720835	0.0453293	0.0300951	0.0571111	0.0305135	0	0.00537569	0.057375	0.103911	0.0821602		0.0483954
8	E2AIX5;XP_025263124.1	0.0246241	0.0455219	0.0200668	0.0246459	0.053268	0.0365484	0.0925672	0.108569	0.0142375	0.0579865		0.0478035
46	E2ARH9;XP_011262712.1	0.0932396	0.0414077	0.0377396	0.0715365	0.0502547	0.0216023	0.0210102	0.0863484	0.0185947	0.0323718		0.0474106
153	XP_019885340.1;E1ZZ64;E1ZZ62	0.133667	0.0061826	0.0255993	0.0496288	0.112188	0.00565165	0.0246509	0.00883088	0.0965528	0		0.0462953
53	XP_011259391.1;XP_011259390.1;E2AJT8	0.0477909	0.0262674	0.0517466	0.0836003	0.031837	0.0728434	0.0545554	0.0355303	0.0239457	0.0239414		0.0452058
124	XP_025262039.1;XP_025262034.1;XP_025262032.1;XP_025262029.1;E2A1S2;E2AVK5	0.0427642	0.0933314	0.00727386	0.0745336	0	0.00729444	0.0528944	0.116792	0.0159462	0.0304527		0.0441283
306	XP_011253234.2;XP_011253233.2;XP_011253232.2;E2A880;XP_011253230.2;XP_011253229.2;XP_025265359.1;XP_011253238.1;XP_011253235.2;XP_011253236.1	0.0544071	0.0372349	0.0313779	0.0587309	0.0166416	0.0833947	0.0166371	0.0311771	0.0549166	0.0553839		0.0439902
295	XP_025269642.1;E2AY85	0.100634	0.022945	0.0272243	0.0843951	0.0173764	0.154209	0	0	0.0308419	0		0.0437625
185	XP_011261154.1;XP_025264083.1;XP_025264079.1;XP_011261152.1;XP_025264076.1;E2ANA9	0.0366459	0.139305	0.0330629	0.020275	0.0276615	0.0658693	0.0437546	0.0110698	0.00776989	0.0456614		0.0431075
73	E2ARJ0;XP_011262743.2	0.0234922	0.0558092	0.0243834	0.064232	0.0302456	0.0719039	0.0505548	0.0338687	0.0353196	0.0393993		0.0429209
304	XP_025263723.1;XP_025263724.1;E2A460	0.0424672	0.04187	0.0230667	0.0436023	0.0559957	0.0823248	0.0118542	0.00779167	0.0696119	0.0458307		0.0424415
227	XP_011254980.1;XP_011254979.1;E2ABH4;XP_011254978.1;XP_011254977.1	0.0590748	0	0.0881769	0.0543319	0.0212512	0.0693362	0	0	0.0690744	0.0628851		0.042413
52	XP_019884091.1;E1ZXR7	0.0209696	0.0558566	0.0480456	0.113403	0.0564091	0.0118463	0.044693	0.0218533	0.0305284	0.0140721		0.0417677
110	XP_011268846.1;XP_011265836.1;XP_011264341.1;E2A0J1	0.0152366	0.0455422	0.127291	0.00665217	0.0300735	0.0376262	0.0872493	0.0260992	0.016941	0.0222358		0.0414947
260	XP_025269241.1;E2AMU9	0.0746659	0.0326146	0.0632377	0.0264889	0.0362424	0.0208628	0.02875	0.0796978	0.0380685	0		0.0400629
82	XP_011259279.2	0.0175071	0.0195082	0.0334541	0.0293667	0.0626627	0.006975	0.104441	0.0853909	0.00777083	0.025075		0.0392152
231	XP_025270291.1;E2AAT8	0.0673779	0.0418511	0.0239987	0.0610528	0.026886	0.0228524	0.0587295	0.0122867	0.0624507	0.0129415		0.0390427
216	XP_011256323.1;XP_011256322.1;XP_011256321.1;E2ADY7;E2ADY5	0.0291874	0.0277977	0.0492266	0.00936555	0.0566026	0.0756472	0.0762606	0.0138835	0.0261149	0.020645		0.0384731
36	XP_025269126.1	0.0479242	0.0399595	0.0457335	0.0264643	0.064773	0.0228543	0.0438839	0.0243586	0.0436451	0.0216091		0.0381206
59	XP_011264740.1;E2AVJ5	0.0219161	0.0209968	0.0301901	0.0457298	0.016572	0.0487042	0.0588522	0.0222389	0.057691	0.0464034		0.0369294
347	XP_011266221.1;E2AYF4;XP_011266222.1	0.0455462	0.0554672	0.0850325	0.0157765	0.0557205	0.0479897	0.0247336	0.0295802	0.00806502	0		0.0367911
202	XP_011253554.1;E2A8R8;XP_011253553.1;XP_011253552.1	0	0.0169951	0.0114458	0.0155516	0	0.184336	0	0.0571105	0	0.082168		0.0367607
248	XP_011265933.1;XP_011265930.1;E2AXR8	0.119059	0	0	0.0048526	0.0570284	0.0294634	0.0299864	0.0254561	0	0.0953771		0.0361223
197	XP_011268843.1;XP_011265835.1;XP_011264345.1;XP_011264342.1;E2AUU4;E2A0I7	0.0193083	0.0204175	0.0363117	0.0108567	0.0534443	0.0479176	0.0488799	0.0541547	0.0382561	0.0178826		0.0347429
485	E2AP99;XP_011261605.2	0.0123696	0.015776	0.106744	0.0466079	0.0160375	0.0261725	0.0137656	0.0673806	0	0.0411677		0.0346021
1	XP_025269163.1;E2AZ61	0.0358591	0.0447423	0.0410097	0.0193992	0.0271735	0.0235163	0.0463223	0.0753848	0.0222563	0.00729356		0.0342957
129	XP_019883740.2;E2AKK9	0.0386637	0.0335491	0.0306699	0.024442	0.0442649	0.0604733	0.0242941	0.0341168	0.0180702	0.0263409		0.0334885
58	XP_011266004.2	0.0238893	0.0435516	0	0.0185306	0	0.0408463	0.106637	0.0274765	0.021418	0.051998		0.0334348
27	XP_025269479.1;E2AJL7	0.0269767	0.041246	0.0248854	0.009	0.0263419	0.0465146	0.0872369	0.0292125	0.0209331	0.0137958		0.0326143
176	XP_011262653.1;E2ARD3	0.0111728	0.0289338	0.0161402	0.0802127	0.0288701	0.0413646	0.0250255	0.0379659	0.0114256	0.0446416		0.0325753
122	E2A5R3;XP_011252033.1;XP_011252032.1;XP_011252034.1;XP_011252062.1	0.0808608	0	0.0358734	0.0852259	0.0385516	0.0407711	0	0.0237083	0.0107583	0.00965208		0.0325402
181	XP_011260992.1;E2AMW3	0	0.0245698	0.0299868	0.0716058	0.0526711	0.0905735	0	0	0	0.0532125		0.032262
21	XP_019882311.2;E2A631	0.04309	0.0523462	0.0144871	0.0121694	0.0770525	0.0291416	0.0489103	0.0240067	0.0164086	0.00355833		0.0321171
62	XP_025269114.1;XP_025269111.1;XP_025269110.1;XP_025269109.1;XP_025269112.1;XP_025269117.1;XP_025269116.1;XP_025269113.1;XP_025269115.1;E2ARB3;E2AEH5;E2AEH6	0.0151458	0.0179744	0.074251	0.018074	0.0104569	0.0522822	0.0308515	0.0470912	0.0234563	0.0294375		0.0319021
336	XP_025268998.1	0.0188049	0.0156461	0.0245155	0.0371067	0.0314342	0.0339272	0.0564169	0.0381435	0.0400253	0.0224875		0.0318508
133	E2A4U9;XP_019882208.1;XP_011251636.1;XP_011251639.2	0.012401	0.0176862	0.013238	0.050845	0.00859513	0.0214326	0.117736	0.0130353	0.0344847	0.0286266		0.031808
385	XP_011264256.1;XP_011264255.1;XP_011264254.1;E2AUK6	0.0285533	0.0243572	0	0.0766	0.0525057	0.0756536	0	0.0105441	0	0.0481826		0.0316396
42	XP_025264613.1	0.00705685	0.0697494	0.0696511	0.0403712	0.00746657	0.0361168	0.0287308	0.0095	0.0340878	0.00868458		0.0311415
54	XP_019882348.2;E2A6E1	0.0169768	0.0199403	0.0627108	0.0182412	0.0328672	0.0371268	0.0220021	0.0061002	0.0424695	0.0520985		0.0310533
50	XP_025265121.1;E1ZWT6	0.0451136	0.0147915	0	0.0293256	0.0174986	0.0206666	0.0586335	0.0413236	0.0553166	0.0247176		0.0307387
191	XP_011251612.1;E2A4T7	0.0252224	0.0596261	0.0209612	0.0143291	0.0560101	0.00636218	0.009525	0.0435324	0.0221075	0.0478077		0.0305484
12	XP_025263076.1	0.0280088	0.0431882	0.015792	0.0964595	0.0189804	0.008325	0.0376239	0.041308	0	0.0106472		0.0300333
126	XP_025270284.1;XP_025270283.1;E2ALT3	0.0189328	0.0162457	0.0142185	0.0153718	0.00761384	0.0385084	0.00873077	0.0449254	0.06222	0.0693888		0.0296156
32	XP_011261399.1;E2ANT2	0.0212992	0.0373423	0.0299517	0.0145726	0.019577	0.0790731	0.0517075	0.0127717	0.0245924	0		0.0290887
107	XP_025262735.1;XP_025262733.1	0.032611	0.0338876	0.0190296	0.0460611	0.0576415	0.055332	0.0089865	0.0149973	0.0138623	0.00750781		0.0289917
119	XP_011266939.2;E2AZU0	0.0251561	0.0342106	0.0201078	0.0049512	0.0351568	0.0969625	0.0276693	0.00375156	0.0151602	0.02512		0.0288246
91	XP_011264019.1;E2AU75	0.0367844	0.00970221	0.0131856	0	0.04955	0.0223672	0.0879749	0.0207681	0.0248812	0.0114526		0.0276666
426	XP_025270581.1;XP_011269446.2;XP_011269445.2;E2A1K5	0.121254	0	0	0.0065625	0.0240484	0.0206	0.00368253	0.0203405	0.0190663	0.0581062		0.027366
95	XP_011259986.1;E2AKV6	0.0463489	0.0234765	0.0111792	0.0406338	0.0102424	0.0402985	0.0154548	0.0229038	0.026328	0.0319525		0.0268818
29	XP_011253495.1;E2A8P0	0.0271606	0.0170753	0.0157446	0.0494292	0.010576	0.030103	0.0234025	0.02436	0.0211657	0.0488986		0.0267916
101	XP_011254133.1;E2A9W2	0.023342	0.00828168	0.119844	0.041919	0	0.00772842	0	0.006394	0.0301673	0.0299091		0.0267585
148	XP_011250693.1;E2A358	0.0220245	0.0203518	0.0200708	0.0435773	0.0153904	0.0317033	0.007308	0.0498695	0.050936	0.0043875		0.0265619
37	XP_011267011.2	0.0220012	0.0231634	0	0.0382712	0.0270032	0.0204297	0.0204668	0.0438836	0.040142	0.0302015		0.0265562
387	XP_011259467.1;E2AJX9;XP_011259465.1	0.0083125	0.00427917	0.0247974	0.0109107	0.0114277	0.0221749	0.0306279	0.0746616	0.0335434	0.0407038		0.0261439
131	E2A543;XP_025262620.1	0.00767472	0.0244135	0.0139482	0.0199824	0.0910209	0.0652326	0.0200011	0.0176437	0	0		0.0259917
190	E2AXM8;XP_011265872.1	0	0.0262495	0.0128868	0.00272837	0.0198528	0.0812746	0.0124723	0.0759209	0.0214633	0.00464687		0.0257496
247	E2AYS3;XP_011266404.2	0.0445181	0.0196513	0.0104985	0.0150969	0.0474803	0.0177616	0.0210546	0.0438666	0.00537745	0.0230386		0.0248344
146	XP_019884788.1;XP_019884801.1;XP_019884800.1;XP_019884798.1;XP_011265227.1;XP_019884796.1;XP_019884794.1;XP_019884790.1;XP_019884789.1;XP_019884786.1;XP_019884785.1;XP_025267686.1;XP_019884802.1;XP_025267684.1;XP_019884792.1;XP_019884791.1;XP_019884787.1;XP_019884803.1;XP_025267682.1;XP_019884793.1;XP_025267685.1	0.0249993	0.0122285	0.0560268	0.0198458	0.00646808	0.0367196	0.0663042	0.0100897	0.00695833	0.00816071		0.0247801
354	E2AYI3;XP_025268444.1;XP_025268446.1;XP_025268445.1	0.00449583	0.0451034	0	0.00864391	0.0740363	0	0	0.0374624	0.0546189	0.0209896		0.024535
45	E2AX77;XP_025264787.1;XP_025264786.1;XP_025264785.1;XP_025264784.1;XP_025264782.1;XP_011265555.2;XP_011265554.2;XP_011265551.2	0.0369718	0.0455227	0.0147376	0.0180716	0.0276836	0.0226019	0.0222111	0.0152816	0.00864271	0.0314024		0.0243127
327	XP_011251155.1;E2A3Z5	0.00610256	0.02109	0.0135114	0.0660482	0.0194598	0.0420388	0.0136701	0.0204743	0.00542981	0.0337753		0.02416
17	XP_011266630.1;E2AZ60	0.0159116	0.0267072	0.0169187	0.0248034	0.0271506	0.0401229	0.0294728	0.0178577	0.013831	0.0273561		0.0240132
87	XP_011258052.1;E1ZX35;E2ANB5;XP_011262825.1;E2ARN6;E2ARF2;XP_011262682.2;XP_011261161.2	0.00990327	0.0363809	0.0098007	0.0136667	0.0406137	0.0199022	0.0250246	0.0240643	0.0325546	0.0240945		0.0236005
265	E2B271;XP_011268025.2	0.00920486	0.0166604	0.041604	0.0161354	0.0265566	0.0513974	0.0314201	0.0172006	0.0038824	0.0214203		0.0235482
56	XP_019884420.2	0.0188207	0.0338014	0.0114973	0.0118917	0.0279008	0.0193021	0.030833	0.0249354	0.05104	0.00440476		0.0234427
376	XP_011250886.1	0.0142083	0	0.0256284	0.0469102	0	0.021969	0.0350038	0.0076625	0.0335537	0.0478112		0.0232747
404	XP_011258665.1;E1ZX82;XP_011265369.1;E2AWS1	0.00681944	0	0.038557	0.01455	0.004125	0.0589178	0	0.0435961	0.0328968	0.0329283		0.0232391
14	XP_025263077.1	0.0267796	0.0149917	0.0245183	0.0117857	0.030945	0.0123068	0.0417675	0.0481565	0.005525	0.0144848		0.0231261
165	XP_011260686.2;E2AM68;E2AM67	0.0605887	0.0136453	0.0226371	0.0415648	0.0239546	0	0.0212315	0.0250014	0.0220419	0		0.0230665
250	XP_011257276.1;E2AFM8	0.0186845	0.0263806	0.0318533	0.0164945	0.0308444	0.0161187	0.0196869	0.0154971	0.0438933	0.0106119		0.0230065
285	E2ALU3;XP_019883849.2	0.0371019	0.0129762	0.00382969	0.0481779	0.0355487	0.0145888	0.0156013	0.0134637	0.038886	0.00814583		0.022832
77	XP_025270286.1;E1ZYU0;XP_011261436.3	0.0357363	0.00800368	0.0189722	0.0200465	0	0.0171015	0.0238136	0.012825	0.0416611	0.0449548		0.0223115
274	XP_011268460.1;E1ZZT5	0.0252318	0.0310389	0.0107925	0.00879814	0.0154526	0.00460837	0.0671278	0.0154949	0.0362472	0.0081142		0.0222906
308	XP_025270282.1;XP_011260493.3	0.0165612	0.0067619	0.0135154	0.0531955	0.00732028	0.0184626	0.0262604	0.0324972	0.0265122	0.0171084		0.0218195
317	XP_011263650.1;E2ATD7	0.0242405	0.00991947	0.0113563	0.0133743	0.0121718	0.0247539	0.0107667	0.0599666	0.0240972	0.0254396		0.0216086
288	XP_011258055.1;E2AHA9	0.0227896	0.0344952	0	0.00865911	0.0366837	0	0.00842604	0.0916311	0.0123788	0		0.0215064
30	XP_019882306.1;E2A5W9	0.0210977	0.00940498	0.0169969	0.0210633	0	0.0398669	0.0279039	0.0167862	0.0300541	0.0295952		0.0212769
379	XP_011265787.1;XP_011265786.1;XP_011265785.1;XP_011265784.1;XP_011265783.1;XP_011265782.1;XP_025264776.1;XP_025264775.1;XP_011265781.1;XP_011265779.1;XP_011265778.1;XP_011265776.1;E2AXI4;XP_019884889.1;XP_011265780.1	0.00545	0.0233106	0.0251338	0.0222778	0.0321136	0.0211098	0.028904	0.0168616	0	0.0360419		0.0211203
192	E2AV99;XP_011264553.1	0.0232694	0.00641667	0.0220994	0.0194366	0.0262239	0.0379661	0.00573889	0.0470851	0.0207637	0		0.0209
26	XP_011252309.2;E2A6E2	0.00422443	0.0069442	0.0205382	0.0149465	0.0523099	0.0221093	0.0120492	0.0244001	0.0379888	0.0128463		0.0208357
130	XP_011263352.1;E2ASQ5	0.01484	0.0155654	0.024163	0.021528	0.00677059	0	0.0219742	0.0169983	0.0735854	0.0125471		0.0207972
412	XP_019882578.1;XP_011253405.1;XP_011253404.1;XP_011253403.1;E2A8G5	0.0254766	0	0.0105485	0.0147939	0.0293592	0.0563027	0.00875833	0	0.0538068	0.00729167		0.0206338
261	XP_011257674.1;E2AGG5;XP_025265771.1	0.00930882	0.0585596	0.00795833	0.0104445	0.0121602	0.0105553	0.008875	0.0638373	0.0188333	0		0.0200532
238	E2AMQ8;XP_025265046.1	0.0297743	0	0.011007	0.0249375	0.0325002	0.0480069	0	0	0	0.0529059		0.0199132
314	XP_011254474.1;E2AAH6	0.029348	0.00676048	0.00915349	0.0514724	0.0116958	0.0349063	0.00844583	0.023446	0.0172031	0.00619984		0.0198631
188	E2ABW9;XP_011255166.1	0.00922558	0.0287834	0.0116119	0.0181811	0.0340454	0.0260865	0.00700967	0.0154596	0.0141756	0.0339013		0.019848
187	XP_011266934.1;E2AZT6	0	0.0251261	0.00975	0.0306355	0.0382202	0.0231865	0.0122211	0.0130761	0.0249629	0.0211618		0.019834
228	XP_011262285.1;E2AQK2;XP_011262284.1	0.0131663	0.0308429	0.0182834	0	0	0.0528783	0.0158542	0.0136635	0.0371584	0.0153298		0.0197177
105	XP_011256347.1;XP_011256346.1;E2ADZ5	0.0145	0.0212042	0.0361054	0	0.0227737	0	0.0212204	0	0.0512945	0.0271854		0.0194284
145	E2B123;XP_025270483.1;XP_011267482.1	0.0472881	0.0185256	0	0.02563	0.0165251	0.0248	0.012073	0.0157232	0.00806022	0.0248099		0.0193435
315	E2AMK0;XP_019883943.1	0.0450718	0	0.0184638	0.0101954	0	0.0532726	0.0306372	0.00839734	0.00535676	0.0207229		0.0192118
18	XP_025264718.1	0.0058125	0.00990699	0.020134	0.0155553	0	0.07005	0.0310423	0.010559	0.016701	0.00875		0.0188511
142	XP_011266940.1;E2AZU1	0.0108913	0.00673611	0.0539026	0.024178	0.0056409	0.0148056	0.011742	0.0204483	0.0196122	0.0199126		0.018787
79	XP_011257736.2	0.0228238	0.0137189	0.0164201	0.0384237	0.0186481	0.00935275	0.0460187	0.0035916	0.0033125	0.0119843		0.0184294
206	E2A0I0;XP_011268828.1;XP_011268827.1	0.00448106	0.00361146	0.0208374	0.0302342	0.0100987	0.0110194	0.0115984	0.00650198	0.0484579	0.0356771		0.0182518
184	XP_025263927.1;XP_019885078.1;E2AZT4;XP_011266928.1	0.0443982	0	0.00362625	0.0536375	0	0.0158397	0	0.0267847	0.0271964	0.0101889		0.0181672
277	XP_011253192.1;E2A7Z9	0.104918	0	0.0212561	0	0.0206025	0	0	0.0198932	0.014855	0		0.0181525
41	E2AQI6;XP_011262241.1;XP_011262243.1;XP_011262250.1;XP_019884226.1;XP_011262249.1;XP_011262248.1;XP_011262247.1;XP_011262246.1;XP_011262245.1;XP_011262244.1	0	0.0316519	0.0362773	0.0496421	0.0138815	0.00933213	0.00790789	0	0.0256346	0.00504095		0.0179368
162	XP_025268350.1;E2AGJ5;E2AGJ4;REV__XP_019883532.1;REV__E2AI05	0	0.0117152	0.00919545	0.031852	0.0101603	0.0503393	0	0.00408894	0.0333871	0.0244241		0.0175162
31	XP_025265137.1;E2ABS8	0.0112661	0.0102628	0.00545833	0.055349	0.0143989	0.00539498	0.0117535	0.0163839	0.0343245	0.00864434		0.0173236
375	XP_011256472.1;XP_011256471.1;E2AE47	0.0215	0.0234216	0.0112226	0.0116178	0.0115493	0.0216823	0.0337675	0.0161155	0.0159013	0		0.0166778
137	XP_011257938.1;E2AH16	0	0.0118157	0.00496667	0	0.0185245	0	0.0320013	0.0309375	0.041939	0.0244276		0.0164612
186	XP_011256209.1;E2ADT4	0.0198493	0.0117096	0.00936667	0.0396935	0.0146184	0.0061859	0.0327722	0	0.0145292	0.0114351		0.016016
356	XP_011267566.2;E2B178	0.00527773	0.0186365	0.0429028	0.0311135	0	0.0199546	0.0202875	0.0164343	0	0.00454167		0.0159149
225	XP_019883321.1;E2AG54	0	0.0205998	0.0144857	0.00695536	0.0380005	0.0290841	0.012	0.00881667	0.00895109	0.0179		0.0156793
156	XP_019883183.1;E2AEN9;XP_011256790.1	0.00720285	0.00889559	0.0117431	0.0125398	0.0280215	0.0287174	0.0145566	0.0197601	0.0110957	0.0142409		0.0156774
99	XP_011253127.1;XP_011253125.1;E2A7Y1;XP_025266675.1;XP_011253124.1	0.00539583	0.00651326	0.00527083	0.0372913	0	0.0124247	0.0306241	0.0183457	0.0283341	0.0105333		0.0154733
115	XP_011265309.2;E2AWK6	0.0319919	0.0192112	0.0094654	0.0514705	0	0	0.0136167	0.0242426	0	0		0.0149998
157	XP_011268777.2;E2A0E4	0.0236163	0	0.0323529	0.0249455	0.0236403	0.00451389	0	0	0.0202008	0.0203536		0.0149623
273	XP_011263226.1;E2ASG6	0.028318	0	0.0186202	0.0272118	0.0601651	0	0	0	0.013838	0		0.0148153
320	XP_025270750.1;XP_025270749.1;XP_025270592.1;XP_025270591.1;E2AJP1;E2B077;E2AT48	0	0	0.0227132	0.0129667	0.0215361	0.0321184	0.0224308	0.0132365	0.0207572	0		0.0145759
329	XP_011255229.1;XP_011255228.1;E2ABZ4;E2ABZ3	0.009975	0.0117185	0.0194488	0.03435	0	0	0.0123655	0	0.0133006	0.0436834		0.0144842
214	XP_011250812.1;E2A3F2	0.0295208	0.00610833	0.0286958	0.0152805	0.00937821	0	0.0192289	0.0049351	0.0106583	0.0199189		0.0143725
245	XP_011268722.1;XP_025270978.1;XP_025270976.1;E2A0C4;XP_025270977.1	0.0580548	0.0126458	0.0123333	0.0140409	0.0080123	0	0	0.0051875	0.0253444	0.00793056		0.014355
11	XP_025263304.1;XP_011263078.2	0.0039985	0.0194982	0	0.0256137	0.0202753	0.0129895	0.0172234	0.00900305	0.0253432	0.0094361		0.0143381
2	XP_025263096.1;XP_025263073.1;XP_025263075.1;E2B003	0.0337491	0.009575	0.0118444	0.00768321	0.0380186	0	0	0.015816	0.0195205	0.00464145		0.0140848
215	XP_011264961.1;XP_011264960.1;E2AVX9	0.0143846	0.0127861	0.0221594	0.0213635	0.0156979	0	0	0.0197426	0	0.0338833		0.0140017
102	XP_011269567.2;E2A1T1	0.00540865	0.0267697	0.007775	0	0	0.0428958	0.0074	0.0164502	0.00550405	0.0231281		0.0135331
204	E2A599;XP_011251836.1	0	0.008498	0.0364753	0	0.00667083	0.00441667	0.0261292	0.0288356	0.008525	0.0120058		0.0131556
84	XP_011255085.1;E2ABQ6	0	0.0144412	0.013928	0.0295076	0.0129542	0.0203593	0	0.0105765	0.0170685	0.00886227		0.0127698
309	E2ANE4;XP_011261213.1	0.024125	0.00504452	0.0209144	0.0143098	0	0.0162083	0.0198049	0	0.013924	0.0125551		0.0126886
199	XP_025269243.1	0.012336	0.0149232	0.0157687	0.00963244	0	0.00649755	0.00939685	0.012296	0.0206679	0.021645		0.0123163
289	E2ABA5;XP_025269147.1;XP_011254839.1;XP_011254838.1;XP_011254837.1	0.0477556	0	0.0207444	0.00324621	0.00596698	0	0	0.031475	0.00952083	0.00363095		0.012234
171	XP_011268592.1;XP_011268591.1;E1ZZY1	0.0139734	0.0144709	0.0126376	0.00785329	0.0439364	0.00770931	0.00704191	0.00714307	0	0.00746712		0.0122233
287	XP_011267373.1;XP_011267372.1;XP_011267371.1;XP_011267370.1;E2B0R2	0.00780308	0.0159398	0.00425873	0.0358888	0	0	0	0.0162533	0.0351983	0.00349862		0.0118841
94	E2A4H5;XP_011251451.1	0.0325446	0.0157148	0.00589475	0	0.0283791	0.0272864	0	0.00405625	0.0049625	0		0.0118838
253	XP_025265208.1;E2AL32	0	0.00452574	0.00719792	0.0213523	0.0114102	0.0436545	0.00762216	0.016551	0.0048125	0		0.0117126
338	E1ZV08;XP_025271395.1;XP_011260504.1;XP_011260421.1	0.00614301	0.00391587	0	0.0415752	0	0.0120417	0	0.00256042	0.0392685	0.0115289		0.0117034
152	XP_011261591.1;E2AP90	0.0140557	0	0.00378581	0.0394636	0.00444243	0.0253214	0.00460937	0	0.0135777	0.0108229		0.0116079
43	XP_011252301.1;E2A6C9	0.00429688	0.0159323	0.019226	0	0.0218965	0	0.0151134	0.00718244	0.0275453	0.00377083		0.0114964
158	XP_025269062.1;E2AGL2	0.0341604	0	0	0.007152	0.00642222	0.0143625	0	0.0134375	0.0283779	0.0105799		0.0114492
218	XP_011254740.1;E2AB19	0.0127681	0.0186351	0.0105625	0.0151079	0.0041256	0.0213014	0.0140202	0.00754167	0.00986667	0		0.0113929
138	XP_025265088.1;E2AG27	0	0	0	0.0393806	0.0198927	0.0316644	0	0	0	0.019265		0.0110203
85	XP_025265943.1;E2AGD3	0.0123036	0.00754025	0.00573674	0.0280891	0.0184317	0	0.015	0.0104046	0	0.0119113		0.0109417
108	XP_011252356.1;E2A6I4	0.00888679	0.0109435	0.0240642	0.0107917	0.01388	0.00364583	0	0.0359091	0	0		0.0108121
163	XP_011260972.1;E2AMV4	0.0299309	0.013093	0.00756396	0	0.00952589	0.00960637	0	0.0062619	0.0285174	0.00358333		0.0108083
47	XP_011260079.2;E2AL14	0.00841875	0.0163531	0.0121519	0.0153556	0.00497619	0.0161382	0.00783295	0	0.0049875	0.0157013		0.0101916
139	E2ABN0;XP_011255042.2;XP_011255044.1;XP_011255043.1	0.0267556	0.010526	0.00327513	0.0116556	0.015948	0.00319479	0.00733974	0.00452083	0.00583633	0.0105663		0.00996183
358	XP_011251028.1;E2A3R3	0.0173178	0.0060674	0.011381	0.00895015	0.00533333	0.00594886	0.0181055	0.00627083	0.007475	0.011764		0.00986139
66	E2AU22;XP_019884578.2	0.0131242	0.0209334	0.00654867	0.013076	0.0101422	0.00520833	0.0047125	0.0132902	0	0.0115582		0.00985936
213	XP_025270637.1;XP_011269375.2;XP_011269374.2;E2A1F2;XP_025270580.1;E2A1F3;XP_025270579.1;XP_025270578.1	0.00597654	0.00564873	0.013676	0.00746173	0.025027	0.00930357	0	0.0190259	0.0119875	0		0.0098107
459	E2ACU8;XP_011255731.1;XP_011255730.1;XP_011255729.1;XP_011255728.1;XP_011255727.1;XP_011255725.1;XP_019882977.1	0.00819765	0	0.0145733	0.0223852	0.0137914	0.0166068	0	0	0.0163765	0.004625		0.00965558
143	XP_025270281.1;XP_019883853.1;XP_011260498.1;E2ALT1	0.0125318	0.011715	0.0210042	0.00433532	0	0.00615986	0.00384722	0.015907	0.00789415	0.011629		0.00950235
242	E2AGQ0	0	0.0179824	0.0038149	0.0273333	0	0.0232599	0	0	0.00420419	0.0180499		0.00946447
167	XP_011267621.1;E2B1B7	0	0.00496686	0.052414	0	0.0064961	0.00427083	0.0260088	0	0	0		0.00941566
121	XP_025263040.1;XP_025263125.1;XP_025263071.1	0.00400877	0	0.0266137	0	0.00302552	0.0111205	0.00775	0.0294324	0.00844261	0		0.00903936
223	XP_011258099.1;E2AHG1	0.0140916	0.00400201	0.0111835	0	0.0161729	0	0	0.0142228	0.0207942	0.00854554		0.00890126
279	E2AIZ4;XP_025262148.1;XP_025262147.1;XP_025262146.1;XP_025262145.1;XP_025262144.1;XP_011258911.1;XP_011258910.1	0.00627061	0	0.00928216	0.00426671	0.0276857	0.00493333	0.0130296	0.0134033	0.00828191	0		0.00871533
290	E1ZVC0;XP_011269033.1	0.0110271	0.0114762	0.00477917	0.00706667	0	0.00586058	0	0.0185684	0.02575	0		0.00845281
149	XP_025267265.1;E1ZYQ6;E1ZYQ5	0	0.017691	0.0113235	0	0	0.032375	0	0	0.0230881	0		0.00844775
292	XP_011251246.1;E2A429;XP_011251245.1;XP_011251244.1	0.0156495	0	0.00926042	0.00846042	0.0129523	0.0167113	0.00587525	0.00923218	0.00483333	0		0.00829747
220	XP_011257803.1;E2AGQ1	0	0.0169806	0	0.0155	0	0	0.00804482	0	0.0290305	0.0126577		0.00822136
280	XP_011266663.1;E2AZ96	0.0181641	0.0198995	0	0.00507083	0.02413	0	0.00718915	0.00603861	0	0		0.00804923
116	E2AK03;XP_025267872.1	0.00414286	0.0073386	0.0364171	0	0.0139364	0.00380833	0	0	0.00677635	0.00741667		0.00798362
401	XP_025269493.1	0.00543068	0	0.0299808	0.016454	0.015218	0.00687175	0	0	0.00430174	0		0.0078257
154	XP_011265213.1;E2AWC1	0.027375	0	0	0	0.00934583	0.0359509	0	0	0.00533333	0		0.0078005
106	XP_011258566.1;XP_011258565.1;E2AIC5	0.00550417	0.00648958	0	0.0302617	0	0.00958333	0.0110952	0.00736936	0.00745423	0		0.00777576
373	XP_011253770.2;E2A938	0.00827537	0.0246823	0	0.0217082	0	0	0	0.0218505	0	0		0.00765163
249	XP_011258106.1;E2AHG9;XP_011258105.1	0.00462054	0	0.0508591	0	0	0.0196616	0	0	0	0		0.00751413
104	E2AGG0;XP_011257663.3	0	0.00741667	0.0039375	0	0.00926964	0.0105598	0.0174357	0	0.0129029	0.0132969		0.0074819
147	XP_019884712.1;XP_011264422.1	0	0	0	0.00693199	0.0317713	0.0298407	0	0.0039027	0	0		0.00724466
422	XP_011251574.1;E2A4R0;XP_011251573.1	0.00815341	0	0.0218611	0	0.00545324	0	0.00977908	0	0.0217379	0.00406743		0.00710522
252	XP_011269558.1;E2A1T0;XP_025262014.1	0	0.00743905	0	0.00503555	0.0574513	0	0	0	0	0		0.00699259
207	E1ZWP8	0.00636905	0	0.0250941	0.0265027	0	0	0	0.00891667	0	0		0.00668826
144	XP_025265691.1;E2AD33	0	0.00376147	0.0081412	0.00409292	0.0196001	0	0	0.012775	0.0172419	0		0.00656126
193	XP_011261506.1;E2AP55	0	0	0	0.0387504	0	0	0	0	0.0147665	0.0118811		0.00653979
244	XP_011250985.1;XP_011250984.1;E2A3N8	0.00826667	0	0.00425568	0.0132545	0.00925	0	0.00444444	0	0.0102427	0.0155134		0.00652274
448	XP_025262700.1;XP_025262698.1;XP_025266100.1;XP_025262697.1;XP_025262696.1;XP_025262695.1;XP_025266099.1;E2ADX2	0.0125138	0	0.0155468	0	0	0	0	0.0126044	0.0238236	0		0.00644887
477	XP_011266509.1	0.00897685	0.00910734	0	0	0	0	0.01525	0.0069082	0.0188515	0.0038037		0.00628975
450	XP_011268143.2;E1ZZ63;XP_011268142.2;XP_011268139.2;E1ZZ67;E1ZZ66;XP_011268140.1;XP_011268141.1;E1ZZ65	0	0.0140458	0.00308264	0	0.00695625	0.00658413	0	0.0198649	0.011526	0		0.00620598
476	XP_011268699.2;XP_011268698.2;E2A097;E2A096;E2AR74;XP_025264019.1;XP_011268697.2	0.00675	0	0.0336847	0.0127229	0	0.00873942	0	0	0	0		0.0061897
234	XP_011263372.1;XP_011263370.1;E2ASS1	0.0134048	0.00855556	0.0125865	0.00803344	0.00454762	0.00402604	0	0.0101297	0	0		0.00612837
267	XP_011264946.1;E2AVX1	0.00473611	0.00422917	0	0.0124934	0.00733654	0.00697826	0	0	0.00975	0.0155118		0.00610352
63	E2AFL0;XP_011257234.1;XP_011257235.1	0	0	0.00368304	0.00503824	0.0199421	0	0.0136529	0	0	0.0169444		0.00592607
357	XP_025268915.1;XP_011252288.1;XP_011252287.1;E2A6B9	0	0	0.0269565	0	0	0	0	0	0.0320341	0		0.00589906
500	E1ZYX6;XP_025268105.1;XP_011267329.1;XP_019884989.1;XP_019884987.1	0	0.017542	0.0114989	0.017355	0	0	0	0.0122396	0	0		0.00586354
456	XP_011254364.2;E2AAA4	0	0	0	0.0202943	0.0235474	0.0147052	0	0	0	0		0.00585468
374	XP_011251576.1;E2A4R1	0	0	0	0.00636852	0	0.0233736	0	0	0	0.027644		0.00573862
282	XP_011253055.2;E2A7S3	0.00435985	0	0.00413333	0	0	0.00525037	0	0	0.01185	0.0285741		0.00541676
428	XP_025271105.1;XP_025271104.1;XP_025271103.1	0	0.00529167	0.00635	0	0.0126111	0	0	0.00382917	0.0165747	0.00876206		0.00534188
64	XP_011255385.1;E2ACC1	0	0.00859425	0.0162238	0	0.00986924	0.00680456	0	0.0045907	0	0.00598556		0.00520681
141	XP_011255653.1;E2ACR9	0	0	0	0.0133492	0	0.0380909	0	0	0	0		0.00514401
240	XP_011254633.1;E2AAT2	0.0040241	0	0	0.0153119	0	0.00857628	0.00344193	0	0.0198104	0		0.00511646
151	XP_011268273.1;E1ZZF6	0	0.00558333	0.00851155	0.0259405	0.00494085	0	0	0	0	0.00506731		0.00500435
180	E2ABI5	0	0	0.0221955	0	0	0.0250301	0	0	0	0		0.00472256
362	XP_011260561.2;XP_011260560.2;E2ALY1	0	0.00463026	0	0	0.0125741	0	0.00395	0.00657353	0.00441504	0.0127636		0.00449065
399	XP_011268790.1;XP_011268795.1;XP_011268794.1;XP_011268793.1;E2A0F3;XP_011268792.1;XP_011268791.1	0	0	0	0.00428056	0	0.022691	0.0124237	0	0.00454073	0		0.0043936
409	E2AZV5;XP_025263902.1;E2A2J4	0	0	0.00329167	0.00908152	0.00799226	0	0	0.00615	0.00744722	0.00965152		0.00436142
236	XP_011255915.1;XP_011255908.1;XP_011255898.1;XP_011255881.1;E1ZWM5	0.00453333	0.00703571	0.0037619	0	0	0	0	0.0134011	0.00643158	0.00795758		0.00431212
174	E1ZYQ1;XP_025267158.1;XP_011266637.1;XP_011266629.1;XP_011266622.1	0.0089375	0.0066131	0.00395313	0.00815179	0.00606875	0	0	0	0	0.00925347		0.00429777
444	XP_011253558.1;E2A8S3	0	0	0.0157006	0	0.0262002	0	0	0	0	0		0.00419009
312	XP_025265136.1	0	0	0	0	0	0	0.0220625	0	0.0187625	0		0.0040825
334	XP_011261977.1;E2APZ9	0	0	0.012619	0	0	0	0	0.0266227	0	0		0.00392417
339	E2A9I6;XP_025271362.1	0	0.0103938	0	0.0165523	0	0	0	0	0.0122467	0		0.00391927
221	XP_011260804.1;E2AMH2	0	0	0.0217107	0.00333413	0.0070418	0	0.00557138	0	0	0		0.0037658
159	XP_011268452.1;E1ZZT0	0.0114979	0.00313125	0.00394187	0	0.018817	0	0	0	0	0		0.0037388
311	XP_025262168.1;XP_011254489.2;E2AAI3	0.00426139	0	0	0	0.0275684	0	0.00538971	0	0	0		0.00372195
211	XP_025262495.1	0.00844848	0	0	0	0	0.0124667	0	0.00403571	0.0122368	0		0.00371877
266	XP_011254456.1;XP_011254455.1;E2AAG3	0.00559848	0.00429889	0	0	0	0.0183894	0.0050167	0	0.00368188	0		0.00369854
217	E2A4Q4;XP_011251564.1	0	0	0	0	0.017639	0.00708636	0.0118269	0	0	0		0.00365523
173	XP_019882645.2;E2A931	0	0.0059375	0	0	0.00376562	0	0.0222097	0.00379948	0	0		0.00357123
117	E1ZV54;XP_011267596.1	0	0.0045	0.00441667	0	0.00875919	0	0	0	0.00687812	0.0109811		0.00355351
489	XP_011254690.1;XP_011254689.1;XP_011254688.1;XP_011254687.1;E2AAW9;XP_025271158.1	0	0.0176591	0	0.00395238	0	0	0	0.00996528	0.00325446	0		0.00348312
427	XP_025263984.1;XP_025263983.1;XP_025263982.1;XP_011252554.1;XP_011252552.1;XP_025263981.1;XP_011252551.1;XP_019882397.1;XP_011252550.1;XP_011252545.2;E2A6V3;XP_011252548.1;XP_025263980.1;XP_011252547.1	0	0	0.00625	0	0.0182711	0.00620865	0	0	0.00350052	0		0.00342302
363	XP_011251474.1;E2A4J2	0	0	0.00777083	0	0	0	0	0.00395365	0.0220477	0		0.00337722
318	XP_011256710.2;E1ZWT9	0.0038625	0	0.00661458	0.00759821	0	0.00339167	0	0.00370833	0.00672991	0		0.00319052
271	XP_011264753.1;E2AVK0	0	0	0.00334305	0.0129704	0	0.00343495	0	0	0.0112534	0		0.00310018
307	XP_025270599.1;XP_025270598.1;E1ZY72	0	0.00529762	0.0064625	0	0	0.0137612	0	0	0.00460252	0		0.00301238
178	XP_011262918.1;E2ARU3	0	0	0	0.00615756	0.0233056	0	0	0	0	0		0.00294631
410	XP_011269303.2;XP_011269302.2;XP_011269301.2;XP_011269299.2	0	0	0	0.0207623	0	0.00419792	0	0	0	0.00424816		0.00292084
382	XP_011259829.1;E2AKH8	0	0	0.0066	0.0104675	0	0	0	0	0.00363542	0.00836667		0.00290696
432	XP_011260463.1;E2ALK0	0	0	0	0	0	0.0283799	0	0	0	0		0.00283799
351	XP_025269390.1;XP_025269389.1;XP_025269388.1;E2AYP1;XP_025269385.1;XP_025269384.1;XP_025269383.1;XP_025269382.1;XP_025269386.1	0	0	0	0.0158675	0	0.011951	0	0	0	0		0.00278185
403	XP_011255476.1;XP_011255475.1;XP_011255474.1;E2ACH8	0	0	0	0.0079879	0	0.0173372	0	0	0	0		0.00253251
402	XP_011261487.1;E2AP46	0	0.00395759	0	0	0.00876471	0	0	0	0.0121766	0		0.00248989
342	XP_011264652.2;E2AVF4	0	0	0	0	0	0.0137504	0	0	0.0105463	0		0.00242967
195	XP_019884897.1;XP_011265919.1;XP_011265918.1;E2AXQ4;XP_025269153.1;XP_025269152.1	0	0	0	0	0.008375	0	0	0	0.0158668	0		0.00242418
343	XP_025266115.1;XP_025266112.1;XP_011258258.1;XP_011258256.1;XP_025266109.1;XP_011258255.1;E2AHP8	0.00527206	0	0	0	0	0.018774	0	0	0	0		0.00240461
326	XP_011267679.1;E2B1G2;XP_011267678.1	0	0	0	0.0119661	0	0	0.00352083	0	0	0.00853002		0.00240169
120	XP_011255639.1;E2ACR2	0	0.00410625	0	0	0.0048125	0.0148285	0	0	0	0		0.00237473
160	XP_011268535.1;E1ZZZ1	0	0	0	0	0	0.0120595	0	0	0	0.0116042		0.00236637
352	XP_011261151.1;E2ANA8	0	0.00295	0	0.0128216	0	0	0	0.00772164	0	0		0.00234932
397	XP_011255877.1;E2AD64	0	0	0	0	0.0232976	0	0	0	0	0		0.00232976
246	XP_011251040.1;XP_011251039.1;XP_011251038.1;E2A3S3;E2A3S0	0	0	0	0	0	0.00417708	0	0.0106525	0.00787837	0		0.00227079
396	XP_011265379.1;E2AWT0	0.00869853	0	0.00429167	0	0.00672995	0	0.00295921	0	0	0		0.00226794
328	XP_025271421.1;E2APS1	0	0	0	0.00395404	0.0034881	0.00325938	0	0	0.00397917	0.00783771		0.00225184
323	E1ZXZ8;XP_011262891.1	0.00362311	0.0111321	0	0	0	0.00395753	0	0	0	0.00372917		0.00224419
405	XP_011254732.1	0	0	0.00534053	0	0.00777359	0	0	0	0.00929196	0		0.00224061
331	XP_011269026.3;E2A0U6	0.00373958	0	0	0.00391875	0	0.00819472	0	0	0	0.00646875		0.00223218
239	XP_011261969.2;E2APZ5	0.00389308	0	0	0.003125	0	0	0	0	0.00429167	0.0108208		0.00221306
394	XP_011258245.1;E1ZX53	0.0218534	0	0	0	0	0	0	0	0	0		0.00218534
445	XP_011268281.2;E1ZZG1	0	0	0.00442536	0	0	0	0	0.00331597	0.00433333	0.00964435		0.0021719
286	E2A6U3;XP_011252509.1;XP_011252508.1	0	0	0.0216794	0	0	0	0	0	0	0		0.00216794
321	XP_011255834.1;XP_011255833.1;XP_011255832.1;E2AD28	0.00358231	0	0	0.00453571	0	0	0.00518311	0	0	0.00772503		0.00210262
219	XP_011262740.1;XP_011262739.1;E2ARI6;XP_011261103.1;E2AN64	0	0	0	0.00417063	0	0	0	0.0160579	0	0		0.00202286
224	XP_011260853.1;E2AMK4	0	0	0.00354167	0	0	0	0.007375	0	0.0092125	0		0.00201292
319	XP_011269444.1;E1ZVE4;XP_011269460.1;XP_011269452.1	0.00899133	0	0	0.00503205	0	0.00456818	0	0	0	0		0.00185916
150	XP_011251814.1;E2A5A3	0.00376667	0	0	0.00468009	0	0	0.00513095	0.00500984	0	0		0.00185875
212	XP_011260887.1;E1ZXK2	0	0	0.0108464	0	0.00429931	0	0	0	0.00328946	0		0.00184351
264	XP_011254448.1;E2AAF9	0.00407212	0	0	0	0.00990293	0	0	0	0	0.00410795		0.0018083
337	XP_011259637.1;E2AK65	0	0	0.0132133	0.00435417	0	0	0	0	0	0		0.00175675
205	E2AJ75;XP_011259035.1;XP_011259034.1;XP_011259042.1	0	0	0	0	0	0	0	0	0.006925	0.0099277		0.00168527
406	XP_011258211.1;E2AHR4	0	0	0	0.0165174	0	0	0	0	0	0		0.00165174
369	XP_011263368.1;E2ASR9	0	0	0	0	0.00923794	0	0	0	0.00680048	0		0.00160384
464	XP_011264128.1;E2AUD9;XP_011264127.1	0	0.011875	0.00351858	0	0	0	0	0	0	0		0.00153936
439	XP_011263425.1;E2ASS7	0	0	0	0	0	0.01526	0	0	0	0		0.001526
398	XP_011256968.1;E2AF24	0	0.00370486	0	0	0.0110083	0	0	0	0	0		0.00147132
345	XP_025269810.1;XP_025269809.1;XP_025269808.1;XP_025269807.1;XP_025269806.1	0	0	0	0	0	0.0144514	0	0	0	0		0.00144514
294	XP_011253803.1;E2A952	0.00555556	0	0	0	0	0	0	0	0.00841434	0		0.00139699
222	XP_011254975.1;E2ABH3	0	0	0.00896086	0	0.00416667	0	0	0	0	0		0.00131275
341	XP_025266198.1;XP_025266197.1;XP_025266196.1;XP_025266195.1;XP_019882760.2	0	0	0	0.00477189	0.00370513	0	0	0	0.00385907	0		0.00123361
182	XP_011262389.1;E2AQV0	0	0	0	0.0122209	0	0	0	0	0	0		0.00122209
420	XP_011267555.1;E2B171;XP_011267554.1	0	0	0	0	0	0	0	0	0.0117102	0		0.00117102
419	E1ZVB4;XP_011268973.1	0	0	0	0.00783821	0	0	0	0	0.00364583	0		0.0011484
365	E2AXN0;XP_011265873.1	0.0034375	0	0	0	0	0	0.00475	0	0	0.0032753		0.00114628
434	XP_019883158.1;E1ZWT7	0	0	0.0114211	0	0	0	0	0	0	0		0.00114211
447	XP_019882165.2;XP_019882163.2;XP_019882164.2;XP_011251397.2;E2A4D2;XP_011251398.2	0.00342222	0.0035506	0	0.0040386	0	0	0	0	0	0		0.00110114
386	XP_011267731.1;XP_011267723.1;E1ZYZ4	0	0	0	0	0	0.0107837	0	0	0	0		0.00107837
172	XP_025268258.1	0	0	0	0	0.00302796	0	0	0.00775	0	0		0.0010778
272	XP_025268772.1;E2A225	0.007	0	0	0	0	0.00369097	0	0	0	0		0.0010691
275	E2B223;XP_011267952.3	0	0	0.00680674	0	0	0	0.00380556	0	0	0		0.00106123
257	XP_011258820.1;E2AIU9	0.0104291	0	0	0	0	0	0	0	0	0		0.00104291
262	XP_025267364.1;E2AMN5;E2AMN4	0	0	0	0.006625	0	0	0.0034308	0	0	0		0.00100558
81	XP_011264690.1;XP_011264688.1;E2AVH4	0	0	0.00386863	0	0	0	0.00609993	0	0	0		0.000996856
400	XP_011256502.1;E2AEA4	0	0	0	0	0	0	0	0	0	0.00971658		0.000971658
481	XP_011253128.1;E2A7Y2	0	0	0	0	0	0	0.00919654	0	0	0		0.000919654
251	XP_011256281.2;E2ADW9;E2ADX0;XP_025262684.1;XP_025262685.1;XP_025262693.1;E2ADW3	0	0	0.00866667	0	0	0	0	0	0	0		0.000866667
299	XP_011252204.1;E2A665	0	0	0	0.00808224	0	0	0	0	0	0		0.000808224
232	E2AME3;XP_011260769.1	0	0	0	0	0	0	0	0	0.00799265	0		0.000799265
335	XP_011264587.1;E2AVB1	0.00370952	0	0	0	0	0.00395833	0	0	0	0		0.000766785
460	XP_011255068.1;XP_011255058.1;E1ZWI0	0	0	0	0	0	0	0	0	0.00374432	0.0037341		0.000747842
284	XP_011259113.1;E2AJB5	0	0	0	0	0	0	0	0	0.0065	0		0.00065
278	XP_011251352.1;E2A481	0	0	0	0	0	0.00622728	0	0	0	0		0.000622728
417	XP_011254475.1;E2AAH7	0	0	0.00620147	0	0	0	0	0	0	0		0.000620147
435	E2AX13	0	0	0.00330808	0	0	0.00284375	0	0	0	0		0.000615183
269	XP_011252045.1;E2A5M2	0	0.00593173	0	0	0	0	0	0	0	0		0.000593173
408	XP_025269798.1	0	0	0	0.005875	0	0	0	0	0	0		0.0005875
210	XP_011266529.1;E2AZ08	0	0	0	0	0	0	0	0	0	0.00575568		0.000575568
380	XP_011269382.1;E2A1F7	0.00541667	0	0	0	0	0	0	0	0	0		0.000541667
367	XP_011254716.1;E2AB03	0	0	0	0	0	0	0.00522647	0	0	0		0.000522647
458	XP_025267422.1;XP_011268639.1;XP_011268638.1;XP_011268637.1;XP_011268636.1;XP_011268635.1;E2A040	0	0	0	0.00498911	0	0	0	0	0	0		0.000498911
346	E2ABB7;XP_025262434.1;XP_025262433.1;E2AAW0;XP_011254668.2;XP_025263358.1;XP_025263357.1;XP_011260570.1;XP_025263356.1;XP_011260569.1;XP_011260568.1;E2ALY5;XP_011260567.1	0	0	0	0	0	0.00463095	0	0	0	0		0.000463095
324	XP_011266432.1;E2AYU1	0	0.00414947	0	0	0	0	0	0	0	0		0.000414947
425	XP_011261314.1;E1ZXM8	0	0.00389583	0	0	0	0	0	0	0	0		0.000389583
155	E2A4N5;XP_011251529.2	0	0	0	0	0	0	0.00387445	0	0	0		0.000387445
355	E2AJP0;XP_025266586.1	0	0	0	0	0	0	0	0	0	0.00347304		0.000347304
303	XP_025269121.1;E2A330	0	0	0	0	0	0	0	0.00339792	0	0		0.000339792
506	XP_011263221.1	0	0	0	0	0	0	0	0	0.00334091	0		0.000334091
368	E2AP51;XP_011261492.1	0	0	0	0	0	0	0	0	0.00295536	0		0.000295536
118	E2AFA5;XP_011257049.1;XP_011257048.1	0	0	0	0	0	0	0	0	0	0		0
161	XP_011257948.1;XP_011257947.1;XP_011257946.1;XP_011257945.1;E2AH19	0	0	0	0	0	0	0	0	0	0		0
179	E1ZXZ4;XP_011255340.2	0	0	0	0	0	0	0	0	0	0		0
196	XP_011266262.1;E2AYI4	0	0	0	0	0	0	0	0	0	0		0
200	XP_011253314.1;E2A8B3	0	0	0	0	0	0	0	0	0	0		0
201	XP_011254033.1;E2A9P2	0	0	0	0	0	0	0	0	0	0		0
226	XP_011251854.1;E2A5C4	0	0	0	0	0	0	0	0	0	0		0
230	E2AE72	0	0	0	0	0	0	0	0	0	0		0
254	XP_011256137.1;E1ZWP1	0	0	0	0	0	0	0	0	0	0		0
255	XP_011251061.1;E2A3T5	0	0	0	0	0	0	0	0	0	0		0
256	XP_025267906.1	0	0	0	0	0	0	0	0	0	0		0
258	XP_025265926.1;XP_025265925.1;E2B1D6	0	0	0	0	0	0	0	0	0	0		0
263	XP_019884886.1;XP_011265840.1;E2AXL2	0	0	0	0	0	0	0	0	0	0		0
270	XP_019883361.1;XP_019883360.1;E2AGJ7;XP_011257718.1	0	0	0	0	0	0	0	0	0	0		0
276	E1ZWT5	0	0	0	0	0	0	0	0	0	0		0
281	XP_011253560.1;XP_011253559.1;E2A8S5	0	0	0	0	0	0	0	0	0	0		0
283	XP_011268669.1;E2A057	0	0	0	0	0	0	0	0	0	0		0
296	XP_011250832.1;E2A3G1	0	0	0	0	0	0	0	0	0	0		0
301	E2AFY9;XP_011257447.1;XP_011257446.1;E2AFY8;XP_025268256.1;XP_025268255.1	0	0	0	0	0	0	0	0	0	0		0
305	E2AVY8;XP_011264984.2	0	0	0	0	0	0	0	0	0	0		0
310	XP_011266198.2;E2AYC1	0	0	0	0	0	0	0	0	0	0		0
313	XP_011267949.1;E2B222	0	0	0	0	0	0	0	0	0	0		0
316	E2A6U2;XP_011252507.2	0	0	0	0	0	0	0	0	0	0		0
322	XP_011259060.1;E2AJ86	0	0	0	0	0	0	0	0	0	0		0
332	XP_011260293.1;E2ALF0	0	0	0	0	0	0	0	0	0	0		0
333	XP_025267701.1;XP_025267700.1;E2AWG1	0	0	0	0	0	0	0	0	0	0		0
340	E2A162;XP_011269204.1	0	0	0	0	0	0	0	0	0	0		0
349	XP_011264487.1;E2AV36	0	0	0	0	0	0	0	0	0	0		0
350	XP_011263339.1;E2ASN8	0	0	0	0	0	0	0	0	0	0		0
359	XP_011252980.1;E2A7M9	0	0	0	0	0	0	0	0	0	0		0
360	XP_011264968.2;E2AVY1;XP_019884608.2;E2AUE2	0	0	0	0	0	0	0	0	0	0		0
361	XP_011268673.2;E2A062	0	0	0	0	0	0	0	0	0	0		0
364	E2AQ44;XP_011262046.1	0	0	0	0	0	0	0	0	0	0		0
366	XP_025266972.1;XP_011259813.1;E2AKG6	0	0	0	0	0	0	0	0	0	0		0
370	XP_011268780.1;XP_011268779.1;E2A0E7	0	0	0	0	0	0	0	0	0	0		0
377	XP_011253226.1;E2A849;XP_011253225.1	0	0	0	0	0	0	0	0	0	0		0
378	XP_011264067.1;XP_011264068.1;E2AUA4	0	0	0	0	0	0	0	0	0	0		0
381	XP_025268059.1;XP_025268060.1;XP_011267296.2;E2AHZ0;E2AHY9;E2B0N7;E2AHZ2;E2AHZ1	0	0	0	0	0	0	0	0	0	0		0
383	XP_011250989.1;E2A3P2	0	0	0	0	0	0	0	0	0	0		0
384	XP_011253906.1;E2A9D3	0	0	0	0	0	0	0	0	0	0		0
388	E2AMK3;XP_011260854.3	0	0	0	0	0	0	0	0	0	0		0
389	XP_011261781.1;XP_011261780.1;E2APK9	0	0	0	0	0	0	0	0	0	0		0
391	E2AXK1;XP_011265833.1	0	0	0	0	0	0	0	0	0	0		0
392	XP_011261604.1;XP_011261603.1;XP_011261602.1;XP_011261601.1;XP_019884096.1;E2AP98	0	0	0	0	0	0	0	0	0	0		0
393	E2A1E3;XP_011269355.1	0	0	0	0	0	0	0	0	0	0		0
395	XP_011252466.1;E2A6R7;XP_011252465.1	0	0	0	0	0	0	0	0	0	0		0
411	XP_011269203.1	0	0	0	0	0	0	0	0	0	0		0
413	XP_025268334.1;XP_011256430.2;E2AE31	0	0	0	0	0	0	0	0	0	0		0
414	XP_025269698.1;E2AYW7;E2AYW6	0	0	0	0	0	0	0	0	0	0		0
415	XP_025264071.1;XP_025264070.1;XP_011255071.1;E2ABP4	0	0	0	0	0	0	0	0	0	0		0
416	XP_011265328.1;E2AWL6	0	0	0	0	0	0	0	0	0	0		0
418	E1ZZJ4;XP_011268367.1;XP_025268277.1;XP_011268365.1	0	0	0	0	0	0	0	0	0	0		0
421	E2AW15	0	0	0	0	0	0	0	0	0	0		0
423	E2AKU3;XP_011259976.1	0	0	0	0	0	0	0	0	0	0		0
424	XP_011253799.1;XP_011253800.1;XP_011253798.1;XP_011253797.1;XP_011253796.1;E2A949	0	0	0	0	0	0	0	0	0	0		0
429	XP_025269497.1	0	0	0	0	0	0	0	0	0	0		0
431	E2AVZ2;XP_025264825.1	0	0	0	0	0	0	0	0	0	0		0
433	XP_011255213.1;XP_011255212.1;XP_025267753.1;E2ABZ0	0	0	0	0	0	0	0	0	0	0		0
436	XP_019885551.1;E2A1P1	0	0	0	0	0	0	0	0	0	0		0
437	XP_011265325.1;XP_011265324.1;E2AWL4	0	0	0	0	0	0	0	0	0	0		0
438	XP_011255975.2;XP_011255974.2;E2ADE0	0	0	0	0	0	0	0	0	0	0		0
440	E2A0Q8;XP_011268952.1	0	0	0	0	0	0	0	0	0	0		0
441	XP_025263257.1;E2AKU5;E2AKU6	0	0	0	0	0	0	0	0	0	0		0
442	XP_025270242.1;XP_011266579.1;XP_011266577.1;XP_011266576.1;XP_011266574.1;XP_011266573.1;E2AZ31;XP_025270240.1;XP_011266571.1	0	0	0	0	0	0	0	0	0	0		0
443	XP_011253629.1;E2A8V7	0	0	0	0	0	0	0	0	0	0		0
446	XP_011266363.1;XP_011266362.1;XP_011266361.1;E2AYQ6	0	0	0	0	0	0	0	0	0	0		0
449	XP_025269140.1	0	0	0	0	0	0	0	0	0	0		0
451	E2AEX0;XP_011256903.1;XP_011256902.1;XP_011256901.1;XP_025267590.1;XP_025267589.1;XP_025267588.1	0	0	0	0	0	0	0	0	0	0		0
452	XP_011264203.1;E2AUL5	0	0	0	0	0	0	0	0	0	0		0
453	XP_011269716.3;E2A226	0	0	0	0	0	0	0	0	0	0		0
454	XP_011258400.1;XP_011258399.1;E2AI07	0	0	0	0	0	0	0	0	0	0		0
455	XP_011255231.1;E2ABZ6	0	0	0	0	0	0	0	0	0	0		0
457	XP_025269261.1;XP_025269260.1;E2AWP0;E2AUY7	0	0	0	0	0	0	0	0	0	0		0
461	XP_011259329.1;E2AJQ0	0	0	0	0	0	0	0	0	0	0		0
462	XP_011262105.1;E2AQ84	0	0	0	0	0	0	0	0	0	0		0
463	E2AF09;XP_011256937.1	0	0	0	0	0	0	0	0	0	0		0
465	XP_011264253.1;XP_011264252.1;XP_011264250.1;XP_011264249.1;E2AUK5	0	0	0	0	0	0	0	0	0	0		0
466	XP_011265518.2;E2AX17	0	0	0	0	0	0	0	0	0	0		0
467	XP_011263009.1;E2AS00	0	0	0	0	0	0	0	0	0	0		0
468	XP_025268062.1;XP_011263604.1;XP_011263603.1;XP_011263602.1;E2ATA4	0	0	0	0	0	0	0	0	0	0		0
469	XP_025268731.1;XP_025270891.1;XP_025265358.1	0	0	0	0	0	0	0	0	0	0		0
470	E2AB34;XP_011254761.1;XP_011254760.1;XP_011254759.1	0	0	0	0	0	0	0	0	0	0		0
471	XP_011262896.1;E2ART6	0	0	0	0	0	0	0	0	0	0		0
472	E2ATZ6;XP_025266208.1	0	0	0	0	0	0	0	0	0	0		0
473	XP_019883837.1;E2ALL5	0	0	0	0	0	0	0	0	0	0		0
474	XP_011252120.1;XP_011252111.1;E1ZVU8	0	0	0	0	0	0	0	0	0	0		0
475	XP_011255161.1;XP_011255160.1;E2ABW5	0	0	0	0	0	0	0	0	0	0		0
478	XP_011263180.1;XP_011263173.1;E1ZY18	0	0	0	0	0	0	0	0	0	0		0
479	XP_011265593.1;XP_011265592.1;E2AX30	0	0	0	0	0	0	0	0	0	0		0
480	XP_025262732.1;XP_025262731.1;E2ATE8;E2ATE6;REV__E2ACI4;REV__XP_011255486.1	0	0	0	0	0	0	0	0	0	0		0
482	XP_011254292.1;E2AA51	0	0	0	0	0	0	0	0	0	0		0
483	E2AD19;XP_011255813.2;XP_025265625.1	0	0	0	0	0	0	0	0	0	0		0
484	XP_019882541.1;E2A827	0	0	0	0	0	0	0	0	0	0		0
486	E2AJY8;XP_011259491.1;XP_011259490.1;XP_011259489.1;XP_019883681.2	0	0	0	0	0	0	0	0	0	0		0
487	XP_011252069.2;E2A5S9;E2A5S6	0	0	0	0	0	0	0	0	0	0		0
488	E2A9H0;XP_025268177.1;XP_025268171.1	0	0	0	0	0	0	0	0	0	0		0
490	XP_011259910.2;E2AKQ7	0	0	0	0	0	0	0	0	0	0		0
491	XP_025269281.1	0	0	0	0	0	0	0	0	0	0		0
492	XP_011258637.1;E2AIH6	0	0	0	0	0	0	0	0	0	0		0
493	XP_025270484.1;XP_011267484.1	0	0	0	0	0	0	0	0	0	0		0
494	E2AY08;XP_025269779.1	0	0	0	0	0	0	0	0	0	0		0
495	E2A4H1;XP_025265505.1	0	0	0	0	0	0	0	0	0	0		0
496	E2A6H4	0	0	0	0	0	0	0	0	0	0		0
497	XP_011259014.1;E2AJ62	0	0	0	0	0	0	0	0	0	0		0
498	XP_011265549.1;E2AX72	0	0	0	0	0	0	0	0	0	0		0
499	XP_025264561.1;XP_025264562.1	0	0	0	0	0	0	0	0	0	0		0
501	XP_011269826.1;E2A2D3;XP_011269825.1;XP_011269824.1	0	0	0	0	0	0	0	0	0	0		0
502	E2AMU0;XP_011260960.1;XP_011260959.1	0	0	0	0	0	0	0	0	0	0		0
503	XP_011259539.1;E2AK02	0	0	0	0	0	0	0	0	0	0		0
504	XP_011269400.1;E2A1H1	0	0	0	0	0	0	0	0	0	0		0
505	XP_011251816.2;E2A5A6	0	0	0	0	0	0	0	0	0	0		0
507	XP_011264788.2;XP_025265583.1;XP_019884711.1;XP_011264789.1;XP_019884710.1;XP_011264791.1;XP_011264783.2;XP_011264786.1;XP_011264785.1;E2AVQ2;XP_011264782.1	0	0	0	0	0	0	0	0	0	0		0
508	XP_011262424.1;E2AQY5	0	0	0	0	0	0	0	0	0	0		0
509	XP_011256604.1;E2AEC2	0	0	0	0	0	0	0	0	0	0		0
510	XP_025271294.1	0	0	0	0	0	0	0	0	0	0		0
511	XP_025266938.1;XP_025266937.1	0	0	0	0	0	0	0	0	0	0		0
512	XP_025263893.1;XP_011264552.1;E2AV98	0	0	0	0	0	0	0	0	0	0		0
513	XP_011265967.1;E2AXV8	0	0	0	0	0	0	0	0	0	0		0
514	XP_025267687.1;E2AWE3	0	0	0	0	0	0	0	0	0	0		0
515	XP_025268117.1	0	0	0	0	0	0	0	0	0	0		0
516	E2A701	0	0	0	0	0	0	0	0	0	0		0
517	XP_019885069.1;E2AZP4;E2AZP6	0	0	0	0	0	0	0	0	0	0		0
518	XP_011254794.1	0	0	0	0	0	0	0	0	0	0		0

## Sheet: RF - FvL
	Accuracy	0.89	1	0.875	0.875	0.875	0.875	0.875	0.875	1
	Seed	10	11	12	13	14	16	17	18	19	20
	col_name	feature_importance_vals	feature_importance_vals	feature_importance_vals	feature_importance_vals	feature_importance_vals	feature_importance_vals	feature_importance_vals	feature_importance_vals	feature_importance_vals	feature_importance_vals
101	XP_011254133.1-E2A9W2	0.372443	0.609221	0.723	0.552723	0.510853	0.699517	0.639157	0.693986	0.617007	0.576628		0.599454
5	XP_011255282.1-E2AC27	0.556115	0.293998	0.472309	0.320854	0.451028	0.681273	0.810968	0.392273	0.441814	0.934548		0.535518
207	E1ZWP8	0.335409	0.456247	0.311719	0.566112	0.525698	0.450083	0.682145	0.657132	0.735936	0.410263		0.513074
10	XP_025266319.1-E1ZXZ5-E2AC93	0.323	0.64315	0.476904	0.347694	0.526497	0.592546	0.510732	0.65311	0.543406	0.198467		0.481551
17	XP_011266630.1-E2AZ60	0.710335	0.347519	0.437255	0.438865	0.523179	0.299427	0.586342	0.543518	0.502561	0.419477		0.480848
141	XP_011255653.1-E2ACR9	0.300292	0.479569	0.30034	0.346975	0.443009	0.58514	0.708868	0.255594	0.520369	0.434724		0.437488
341	XP_025266198.1-XP_025266197.1-XP_025266196.1-XP_025266195.1-XP_019882760.2	0.338749	0.477513	0.418897	0.523709	0.420797	0.545987	0.427644	0.333448	0.449499	0.355248		0.429149
66	E2AU22-XP_019884578.2	0.247197	0.383191	0.638446	0.263795	0.256683	0.411746	0.299966	0.318138	0.33773	0.510471		0.366736
331	XP_011269026.3-E2A0U6	0.585831	0.196877	0.252222	0.455941	0.301837	0.32839	0.342184	0.398873	0.302947	0.315743		0.348085
307	XP_025270599.1-XP_025270598.1-E1ZY72	0.462785	0.361854	0.476827	0.26934	0.364427	0.632348	0.233374	0.298933	0.192063	0.125654		0.34176
164	XP_011261637.1-E2APC4	0.292616	0.408106	0.442442	0.697418	0.354211	0.180534	0.187066	0.34022	0.226073	0.269052		0.339774
205	E2AJ75-XP_011259035.1-XP_011259034.1-XP_011259042.1	0.223541	0.36796	0.509839	0.199648	0.208089	0.367434	0.414264	0.325443	0.310799	0.231651		0.315867
131	E2A543-XP_025262620.1	0.384731	0.379233	0.249208	0.317947	0.328071	0.411754	0.342696	0.261169	0.110002	0.351911		0.313672
87	XP_011258052.1-E1ZX35-E2ANB5-XP_011262825.1-E2ARN6-E2ARF2-XP_011262682.2-XP_011261161.2	0.218913	0.206302	0.41009	0.430036	0.319623	0.22538	0.140483	0.332673	0.252789	0.479859		0.301615
220	XP_011257803.1-E2AGQ1	0.152671	0.528796	0.334576	0.382617	0.240738	0.242491	0.140318	0.143901	0.455982	0.326272		0.294836
15	XP_011266010.1-E2AY02	0.3963	0.254978	0.071257	0.569941	0.326621	0.434412	0.253178	0.155697	0.173649	0.299015		0.293505
31	XP_025265137.1-E2ABS8	0.250131	0.21349	0.170619	0.224722	0.119724	0.0857829	0.193152	0.626883	0.28378	0.627396		0.279568
130	XP_011263352.1-E2ASQ5	0.316156	0.08074	0.17415	0.512042	0.456006	0.173568	0.181962	0.280192	0.326967	0.187467		0.268925
57	E2AX18-XP_011265519.1-XP_011265517.1	0.340214	0.302984	0.260505	0.209771	0.128871	0.454897	0.0502039	0.322263	0.320127	0.262527		0.265236
198	XP_011268873.1-XP_011268841.1-XP_011264343.1-XP_011264339.1-E2AUU5-E2AUU1-E2A0I8-XP_011252166.1-E2A633-E2AGF1-XP_011257651.1-XP_011257652.1	0.184374	0.208279	0.260538	0.222164	0.236577	0.171898	0.109564	0.248665	0.347367	0.242093		0.223152
82	XP_011259279.2	0.340766	0.140249	0.205005	0.212807	0.193866	0.18786	0.371895	0.193323	0.246214	0.136908		0.222889
3	XP_011259281.2	0.322296	0.196409	0.0880888	0.210615	0.137242	0.209437	0.149037	0.293623	0.411109	0.201211		0.221907
72	E2AY06-XP_011266013.1	0.282321	0.145074	0.0730693	0.556614	0.257002	0.254127	0.127081	0.032081	0.180864	0.246385		0.215462
161	XP_011257948.1-XP_011257947.1-XP_011257946.1-XP_011257945.1-E2AH19	0.308537	0.228192	0.0729707	0.201686	0.0684828	0.453354	0.190759	0.111478	0.16142	0.269121		0.2066
218	XP_011254740.1-E2AB19	0.187708	0.144749	0.0740762	0.32159	0.251865	0.222264	0.251717	0.159178	0.0168571	0.0913955		0.17214
19	XP_025269485.1-XP_025269481.1-E2A1Y6	0.0631509	0.0974856	0.109392	0.110544	0.186872	0.164818	0.112373	0.0922951	0.242972	0.52902		0.170892
231	XP_025270291.1-E2AAT8	0.186369	0.132744	0.346137	0.107267	0.238748	0.0783393	0.220212	0.16127	0.129322	0.0764357		0.167684
156	XP_019883183.1-E2AEN9-XP_011256790.1	0.184922	0.155473	0.0792175	0.0854674	0.174021	0.425651	0.0774798	0.13198	0.140072	0.120822		0.157511
194	XP_011264385.1	0.199967	0.14684	0.122455	0.0896846	0.444111	0.10735	0.119963	0.0983592	0.0238387	0.169525		0.152209
139	E2ABN0-XP_011255042.2-XP_011255044.1-XP_011255043.1	0.0583212	0.173506	0.521242	0.0727582	0.0528686	0.0301243	0.106965	0.143262	0.209673	0.142347		0.151107
104	E2AGG0-XP_011257663.3	0.0580303	0.236336	0.240593	0.0686856	0.384847	0.201523	0.141528	0.0572593	0.0726574	0.0436783		0.150514
305	E2AVY8-XP_011264984.2	0.0419464	0.0362289	0.115368	0.11813	0.106453	0.340355	0.196324	0.109131	0.0777635	0.235653		0.137735
110	XP_011268846.1-XP_011265836.1-XP_011264341.1-E2A0J1	0.0905433	0.348799	0.130587	0.130706	0.183769	0.0499369	0.0526141	0.274811	0.0653085	0.0334592		0.136054
206	E2A0I0-XP_011268828.1-XP_011268827.1	0.115274	0.141376	0.0779833	0.09818	0.371935	0.0155733	0.201118	0.130707	0.0928805	0.025368		0.12704
14	XP_025263077.1	0.168352	0.195569	0.0220444	0.0488768	0.0646494	0.140113	0.231881	0.113826	0.145257	0.085095		0.121566
2	XP_025263096.1-XP_025263073.1-XP_025263075.1-E2B003	0.148832	0.0738377	0.0167848	0.222784	0.0298526	0.0561998	0.0998038	0.170497	0.218229	0.174598		0.121142
166	XP_011257750.1-E2AGM0-E2A8L3-XP_011253498.1	0.069055	0.0985776	0.316436	0.0683185	0.102552	0.0760279	0	0.1631	0.150946	0.0872331		0.113225
379	XP_011265787.1-XP_011265786.1-XP_011265785.1-XP_011265784.1-XP_011265783.1-XP_011265782.1-XP_025264776.1-XP_025264775.1-XP_011265781.1-XP_011265779.1-XP_011265778.1-XP_011265776.1-E2AXI4-XP_019884889.1-XP_011265780.1	0.0885004	0.0489389	0.0327548	0.0656558	0.0665868	0	0.211932	0.253917	0.170438	0.175098		0.111382
344	XP_025265510.1-XP_019884763.1-XP_011265197.1-XP_011265195.1-XP_019884762.1-XP_019884761.1-XP_011265194.1-XP_011265193.1-XP_011265191.1-XP_011265190.1-XP_011265189.1-E2AWB0	0.197145	0.182567	0.156991	0.159841	0.149533	0.0210597	0	0.11218	0.0290976	0.0486454		0.105706
8	E2AIX5-XP_025263124.1	0.179504	0.0949089	0.0401726	0.031155	0.0255438	0.135824	0.187668	0.0521488	0.152236	0.0667585		0.096592
67	E2ALP2-XP_011260424.1	0.224285	0.135148	0.043349	0.055683	0.0360984	0.0253718	0.0875211	0.120052	0.0540606	0.182656		0.0964224
6	XP_011257802.2-XP_011257800.2	0.0722505	0.0930668	0.00560714	0.117447	0.0649062	0.149619	0.0901238	0.0994704	0.106388	0.0996713		0.089855
64	XP_011255385.1-E2ACC1	0.0229636	0.145114	0.313261	0.0132	0.0864447	0.0333214	0.0384979	0.111817	0.095636	0.0151899		0.0875446
65	XP_011258918.1-E2AIZ6	0.0559259	0.184027	0.0851921	0.0286631	0.159152	0.08335	0.028725	0.115222	0.070832	0.0625205		0.0873609
45	E2AX77-XP_025264787.1-XP_025264786.1-XP_025264785.1-XP_025264784.1-XP_025264782.1-XP_011265555.2-XP_011265554.2-XP_011265551.2	0.0776455	0.0111786	0.0098869	0.0255989	0.0715582	0.166505	0.0407834	0.0511046	0.186342	0.232623		0.0873227
46	E2ARH9-XP_011262712.1	0.0709757	0.129164	0.0927856	0.0554493	0.0546601	0.0746377	0.100744	0.0306727	0.116505	0.0890803		0.0814674
116	E2AK03-XP_025267872.1	0.0397479	0.0655173	0.018169	0.0672184	0.10759	0.143774	0.0671773	0.10329	0.039168	0.160656		0.0812308
171	XP_011268592.1-XP_011268591.1-E1ZZY1	0.0444039	0.071987	0.104609	0.0325619	0.0555849	0.132818	0.243137	0.0276359	0.0683682	0.0199702		0.0801075
325	XP_025266889.1-E2A031	0.0445794	0.0787329	0.0868118	0.0983532	0.17884	0.0895781	0.0516801	0.134186	0.0236988	0.00644643		0.0792907
63	E2AFL0-XP_011257234.1-XP_011257235.1	0.107317	0.154836	0.0198534	0.0767518	0.079438	0.135082	0.0217558	0.0343088	0.0828939	0.0511769		0.0763413
98	XP_011260780.1-E1ZXJ7	0.0499762	0.149852	0.00770952	0.0785196	0.111492	0.0161847	0.100755	0.0346461	0.0721945	0.114081		0.073541
159	XP_011268452.1-E1ZZT0	0.118437	0.0213125	0.159637	0.0281964	0.120245	0.0494679	0.0510318	0.0632647	0.0860181	0.0374298		0.073504
208	XP_025268061.1-XP_011260793.1-E2AMG4	0.0160438	0.0250429	0.0585234	0.140704	0.0642734	0.161981	0.130293	0.0277715	0.0730168	0.0354865		0.0733137
38	E2AJL8	0.142468	0.052396	0.0324334	0.0474114	0.00720346	0.055819	0.0607	0.207143	0.0904841	0.0330624		0.0729121
126	XP_025270284.1-XP_025270283.1-E2ALT3	0.0538905	0.110963	0	0.101256	0.112427	0.15393	0.0254976	0.0856409	0.0726253	0.0115979		0.0727828
68	XP_011268594.2	0.100171	0.154194	0.0526783	0.0650364	0.0223732	0.0323128	0.0757442	0.129188	0.0506804	0.0309732		0.0713352
18	XP_025264718.1	0.0751616	0.045962	0.0531995	0.0892181	0.0065619	0.0975491	0.0384841	0.0824475	0.126689	0.0481904		0.0663463
459	E2ACU8-XP_011255731.1-XP_011255730.1-XP_011255729.1-XP_011255728.1-XP_011255727.1-XP_011255725.1-XP_019882977.1	0.0307202	0.08206	0.216344	0.0370205	0.0687812	0.1049	0.0367947	0.0134196	0.0521587	0.00650794		0.0648706
279	E2AIZ4-XP_025262148.1-XP_025262147.1-XP_025262146.1-XP_025262145.1-XP_025262144.1-XP_011258911.1-XP_011258910.1	0.0415988	0.0319226	0.144617	0.0475578	0.053196	0.0055881	0	0.265001	0.0272401	0.031127		0.0647848
200	XP_011253314.1-E2A8B3	0.00704762	0.0435132	0.164345	0.0430439	0.142532	0.0614963	0	0.0745768	0.0865648	0.0168		0.0639919
303	XP_025269121.1-E2A330	0.0712838	0.0499563	0.0738791	0.134159	0.114595	0.0379652	0.0330571	0.0426723	0.0327738	0.0475255		0.0637867
262	XP_025267364.1-E2AMN5-E2AMN4	0	0.124918	0	0.00980357	0.0335159	0	0.0812051	0.0798565	0.124295	0.165153		0.0618747
298	E2A8M5-XP_025269992.1	0.0265354	0.0961428	0.0132507	0.0621578	0.0683882	0.0643673	0.0245802	0.0436921	0.0989751	0.116478		0.0614567
371	XP_025269141.1	0.00985714	0.125064	0.0858095	0.024631	0.0239271	0.0177262	0.137262	0.031496	0.0967731	0.0600481		0.0612593
119	XP_011266939.2-E2AZU0	0.0238929	0.0114952	0.116296	0.044086	0.0365064	0.130631	0.100784	0.0599024	0.0689587	0.012		0.0604551
211	XP_025262495.1	0.0667057	0.0670394	0.130693	0.0787594	0.0230027	0.0610718	0.0914068	0.0166366	0.0238929	0.0452155		0.0604424
79	XP_011257736.2	0.039864	0.0087619	0.0134755	0.0322245	0.0617682	0.0444495	0.0505538	0.066596	0.200389	0.0836018		0.0601685
7	XP_011252932.2-E2A7K7	0.0354528	0.130774	0.0438953	0.0647064	0.0221091	0.0767559	0.0839955	0.0444898	0.00646825	0.0831246		0.0591771
287	XP_011267373.1-XP_011267372.1-XP_011267371.1-XP_011267370.1-E2B0R2	0.119625	0.0468625	0.0726403	0.0721365	0.0688179	0.0444589	0.0262083	0.0805998	0.0263155	0.0330599		0.0590725
103	XP_019882595.1-E2A8M9	0.0152409	0.172281	0.0835454	0.0636935	0.0325516	0.104957	0.0626786	0.0108207	0.0240695	0.00372222		0.057356
90	XP_011259751.1-E2AKD6	0.0835394	0.0395452	0.00676786	0.0108054	0.112789	0.073563	0.0812852	0.0251595	0.0217414	0.107722		0.0562918
210	XP_011266529.1-E2AZ08	0.0219762	0.10298	0.14464	0.0735422	0.0313059	0.0313643	0.0739332	0.0633116	0.0181905	0		0.0561245
261	XP_011257674.1-E2AGG5-XP_025265771.1	0.0363394	0.0642795	0.0242858	0.0519396	0.0339383	0.00711429	0.125481	0.121846	0.0457638	0.0445102		0.0555497
136	XP_011261310.1-XP_011261309.1-XP_011261308.1-XP_011261307.1-XP_011261306.1-E2ANL8	0.0294996	0.0118278	0.113623	0.0815483	0.0980642	0.0172015	0.0440669	0.102139	0	0.0570148		0.0554985
258	XP_025265926.1-XP_025265925.1-E2B1D6	0.0861926	0.0234643	0.0843074	0.060508	0	0.0236286	0.0597711	0.10804	0.0297525	0.0518004		0.0527465
21	XP_019882311.2-E2A631	0.0877959	0.00507792	0.0207429	0.023819	0.0976807	0.0351199	0.0976395	0.0634995	0.0241601	0.0674977		0.0523033
13	XP_025264611.1	0.194992	0.0329601	0.0224371	0.0468042	0.061491	0.0806708	0.0178923	0.053531	0	0.00401786		0.0514797
97	XP_025267301.1-E2B0F9-XP_025264883.1-XP_025264884.1-E1ZYR2	0.0697685	0.0519613	0.0596861	0.101275	0.110298	0.00533333	0.0177071	0.0155845	0.0521623	0.0301857		0.0513962
43	XP_011252301.1-E2A6C9	0.00612698	0.106382	0.0985449	0.0196	0.0499942	0.0685434	0.0124392	0.0166356	0.131082	0.00404762		0.0513395
140	XP_011267179.1-E2B0D3	0.111753	0.0459881	0.0084	0.040086	0.0196071	0.0937662	0.0636197	0.0492342	0	0.0663518		0.0498807
304	XP_025263723.1-XP_025263724.1-E2A460	0	0.0320595	0.127657	0.0260893	0.00740422	0.0796977	0.0779191	0	0.11185	0.0328697		0.0495547
55	XP_011262697.2-E2ARG4-E2A6I8-XP_011252363.1-XP_011252362.1	0.02385	0.064378	0.0749286	0.0230483	0.00718651	0.0187961	0.209852	0.0331504	0.0309548	0.00664286		0.0492788
52	XP_019884091.1-E1ZXR7	0.00492674	0	0.132153	0.0083631	0.119909	0.0233274	0.07237	0.0500893	0	0.0764231		0.0487561
385	XP_011264256.1-XP_011264255.1-XP_011264254.1-E2AUK6	0.00353175	0.0139329	0.18016	0.0702074	0.0188651	0.0237132	0.0334345	0.0392351	0.0635791	0.0201484		0.0466808
60	XP_019884394.1-XP_011262974.1-E2ARX6	0	0.118562	0.0278105	0.0323631	0.0248519	0.0487676	0.0343561	0.148846	0.00889099	0.0197467		0.0464195
44	XP_011253679.1-E2A8Y6	0.0398464	0.00408929	0.120507	0.0597806	0.0476452	0.0210412	0.0762643	0.00671429	0.042141	0.0439359		0.0461966
187	XP_011266934.1-E2AZT6	0.0312143	0.0949956	0.0151071	0.0433798	0.0505994	0.0127867	0.0673216	0.0785225	0.0277732	0.0150401		0.043674
188	E2ABW9-XP_011255166.1	0.0392349	0.0617508	0.0278749	0.0586273	0.0312956	0.0425732	0.0427911	0.0467985	0.0677078	0		0.0418654
11	XP_025263304.1-XP_011263078.2	0.0372588	0.00348508	0.0119267	0.0390429	0.0788671	0.073391	0.0272274	0.0669113	0.0313	0.0490787		0.0418489
102	XP_011269567.2-E2A1T1	0.00706375	0.0630546	0.0232371	0.00318819	0.00530182	0	0.0900274	0.1146	0.0573264	0.0396329		0.0403432
169	E2A6W8-XP_011252591.1	0.0158204	0.0040119	0	0.0457482	0.0190421	0.0484524	0.0132309	0.0522321	0.0215162	0.182052		0.0402106
114	XP_011260763.1-E2AMD6-XP_011260762.1	0.0100762	0.0359	0.0891563	0.0448259	0.0850668	0.0196012	0.0269577	0.0161111	0.046807	0.022894		0.0397396
138	XP_025265088.1-E2AG27	0.00719048	0.0781579	0.0554863	0.031619	0.0404805	0.0096746	0	0.0465343	0.0746674	0.0495095		0.039332
204	E2A599-XP_011251836.1	0.0429593	0.0282738	0.0253095	0.0297157	0.00938095	0.0460188	0.146816	0.0258898	0.0323777	0		0.0386742
33	XP_025262946.1-XP_019882428.1-XP_019882427.1-XP_019882425.1-XP_019882423.1-XP_019882399.1-XP_019882376.1-XP_025262953.1-XP_025262951.1-XP_025262949.1-XP_025262945.1-XP_025262944.1-XP_025262943.1-XP_019882419.1-XP_019882418.1-XP_019882409.1-XP_019882401.1-XP_019882400.1-XP_019882398.1-XP_019882396.1-XP_019882393.1-XP_019882391.1-XP_019882383.1-XP_019882380.1-XP_019882377.1-XP_019882375.1-XP_025262…	0.0509381	0.0270918	0.026873	0.0979222	0.056441	0.0409202	0.0084375	0.0294702	0.0315357	0.0163589		0.0385989
197	XP_011268843.1-XP_011265835.1-XP_011264345.1-XP_011264342.1-E2AUU4-E2A0I7	0.0123102	0.0191714	0.0384741	0.0288113	0	0.0506287	0.0443831	0.093	0.032878	0.0536456		0.0373302
272	XP_025268772.1-E2A225	0	0.0577738	0.0144242	0.0980305	0.0238802	0.0331996	0.0237035	0.0873176	0.0279445	0		0.0366274
22	XP_025269812.1	0.0337198	0.126979	0.00973773	0.0429647	0.0102348	0.00522944	0.0372541	0.055761	0.00517316	0.037229		0.0364282
178	XP_011262918.1-E2ARU3	0.0150834	0.0635397	0.0855774	0.12159	0.00793651	0	0.0180198	0.0382688	0.00393254	0.00705357		0.0361002
24	XP_025264610.1	0	0.0169989	0	0.00597619	0.0167127	0.196471	0.0552406	0.00453148	0.0158509	0.0428571		0.0354639
191	XP_011251612.1-E2A4T7	0.0744613	0.0271338	0	0.0830487	0.0286825	0.0668372	0.0276786	0.0112655	0.0233918	0.0088301		0.0351329
348	XP_025269663.1-XP_025269662.1-XP_025269661.1-XP_025269660.1-E2A1Z0-XP_025269664.1	0.053599	0.0157302	0	0.0228845	0.00966429	0.0168538	0.0230047	0.161163	0.0150675	0.0310994		0.0349066
0	XP_011252500.2-E2A6T2	0.0437544	0.0460484	0	0.0766052	0.0332955	0.011619	0.0415076	0.0139124	0.0606241	0.0211584		0.0348525
12	XP_025263076.1	0.0421787	0.015041	0.0348115	0.0425204	0.00424405	0.052544	0.0543548	0.00866117	0.053334	0.0406296		0.0348319
107	XP_025262735.1-XP_025262733.1	0.0153173	0.0933965	0.129303	0	0.0314701	0.0295828	0	0.00943452	0.0118912	0.0182619		0.0338658
94	E2A4H5-XP_011251451.1	0.0454094	0.0096875	0.0111905	0.0679583	0.00388988	0.0308115	0.0720961	0.0235895	0.0247063	0.0477249		0.0337064
34	XP_025269201.1-XP_025269204.1-XP_025269202.1-XP_025269214.1-XP_025269200.1-XP_025269199.1-XP_025269198.1-XP_025269197.1-XP_025269196.1-XP_025269195.1-XP_025269194.1-XP_025269193.1-XP_025269192.1-XP_025269191.1-XP_025269189.1-XP_025269188.1-XP_025269187.1-XP_025269186.1-XP_025269185.1-XP_025269184.1-XP_025269183.1-XP_025269182.1-XP_025269181.1-XP_025269180.1-XP_025269179.1-XP_025269178.1-XP_025269…	0.0241889	0.00965387	0.0580214	0.0189581	0.0330179	0.0253595	0.0338554	0.0323571	0.0503738	0.0451504		0.0330936
229	XP_025264147.1	0.0104592	0	0.01165	0.012767	0.0258817	0.0369076	0.0442043	0.121645	0.0359575	0.0150238		0.0314496
375	XP_011256472.1-XP_011256471.1-E2AE47	0.0352302	0.0136238	0.00895702	0	0.0906333	0.0552613	0.0769397	0.0139206	0.0115536	0		0.030612
86	XP_011259459.2-E2AJX6	0.0288899	0.00809615	0.0327726	0.0060873	0.0977021	0	0.00938655	0.041368	0.0195411	0.0612484		0.0305092
47	XP_011260079.2-E2AL14	0.0103762	0.0378974	0.0440807	0.00766702	0.0315918	0.0286786	0.0308187	0.054051	0.0209444	0.0376512		0.0303757
408	XP_025269798.1	0.0035467	0.0224786	0.0415542	0.10171	0.0576686	0.022993	0	0.0346947	0.0091039	0.00460714		0.0298357
472	E2ATZ6-XP_025266208.1	0.0418095	0.0292571	0.0457772	0.00830952	0.00930952	0.0382391	0.0237731	0.0426762	0.0561719	0		0.0295323
318	XP_011256710.2-E1ZWT9	0.00939385	0.0190833	0.0701086	0.0127718	0.0580339	0	0	0.0253697	0.0590509	0.0408376		0.029465
273	XP_011263226.1-E2ASG6	0.0400229	0.0334631	0.040411	0	0.0446063	0.00830357	0.0325476	0.0156766	0.0218661	0.0402659		0.0277163
170	XP_011255648.1-E2ACR5	0.0435123	0.0174794	0.0413947	0.0642891	0.0164365	0.0197665	0.0087437	0	0.02279	0.0411497		0.0275562
23	E2ALS8-XP_019883851.2	0.0208882	0.0375555	0.0266648	0.00600714	0.074675	0	0.0119643	0.0561637	0.0075119	0.0319448		0.0273375
74	XP_011264892.1-XP_011264890.1-E2AVV1	0.0593738	0	0	0.0199709	0.0171869	0.0754041	0	0.0285115	0.0123357	0.0583955		0.0271178
112	XP_011268522.1-E1ZZX0	0.0391499	0.0540394	0.0264718	0.0188786	0.0391761	0.0172576	0	0.0130972	0.0416568	0.017795		0.0267522
135	XP_011257343.1-XP_011257342.1-E2AFQ5	0.0326735	0.0780267	0.0322405	0.0310265	0	0	0.00828571	0.0133619	0.0132182	0.0575964		0.0266429
81	XP_011264690.1-XP_011264688.1-E2AVH4	0	0.0181571	0.0112571	0	0.00437698	0.0762893	0.113204	0	0.00503988	0.0250571		0.0253382
151	XP_011268273.1-E1ZZF6	0.0109063	0.004	0	0.0249825	0.00960924	0.0175034	0.0393476	0.0444083	0.069177	0.0242103		0.0244145
134	XP_011266818.1-E2AZK6-XP_011266817.1	0.0528273	0.0133592	0.0391749	0	0.0140269	0	0.0555194	0.00807738	0.0466232	0.0117431		0.0241351
96	XP_025266940.1-XP_019883729.1-E2AKF6	0.0809908	0.00845	0	0.0180995	0	0.00792665	0.0257102	0.0269645	0.0248679	0.0350886		0.0228098
192	E2AV99-XP_011264553.1	0.00994048	0.0208283	0.0436571	0.013254	0.00565774	0.00553571	0.0391503	0.0132528	0.066555	0.00946429		0.0227296
53	XP_011259391.1-XP_011259390.1-E2AJT8	0.0105143	0.00408379	0.0331887	0.00882566	0.0235556	0	0.00738274	0	0.0974273	0.0397673		0.0224745
37	XP_011267011.2	0.00901431	0.0328305	0.0149053	0.00948535	0.0919839	0.00426905	0.0344853	0.00919048	0.00410417	0.0109603		0.0221229
16	XP_025262760.1-E2ATD2	0.00378618	0.0115357	0	0.0209121	0.0103641	0.0637071	0.0494125	0.019754	0.0121492	0.0243789		0.0216
259	XP_011265525.1-E2AX16-E2AX15	0.0209744	0.0308543	0.00457143	0.0052	0.00412013	0.035566	0.00394805	0.020025	0.012808	0.072036		0.0210103
1	XP_025269163.1-E2AZ61	0.0185851	0.0288754	0.00894109	0.0661146	0.0252448	0.0321589	0.0071456	0	0.0139333	0.00863776		0.0209637
58	XP_011266004.2	0.0470979	0.0492128	0	0.016184	0	0.0322649	0.025875	0.0147745	0.00727837	0.016114		0.0208801
4	XP_011266069.1-E2AY28	0	0.0199077	0.00576984	0.0191224	0.0272009	0.0295923	0.0657847	0.0149032	0.02021	0.0040368		0.0206528
145	E2B123-XP_025270483.1-XP_011267482.1	0	0.012468	0.00508036	0.015943	0.0401394	0	0.0130588	0.0124293	0.0374952	0.0696482		0.0206262
117	E1ZV54-XP_011267596.1	0	0.0321961	0.025381	0.0099712	0	0.0159821	0.0364286	0.0119167	0.0507321	0.0219394		0.0204547
124	XP_025262039.1-XP_025262034.1-XP_025262032.1-XP_025262029.1-E2A1S2-E2AVK5	0.0226014	0.00502381	0.0184286	0.0416855	0.0416214	0.00484524	0.0187594	0.0311132	0.00815734	0.00922893		0.0201465
75	XP_011267122.2-XP_011267116.2-XP_011267109.2-XP_011267102.2-XP_011267093.2-XP_011267131.3-E1ZYU8	0.019996	0.0166786	0.0322118	0.0183971	0.0055401	0.0433131	0	0.04528	0.0189104	0		0.0200327
100	E2AK04-XP_011259541.1	0.0346085	0.022632	0.00753305	0.012112	0.00562885	0.01165	0.0304397	0.0309926	0.00512546	0.0374545		0.0198177
250	XP_011257276.1-E2AFM8	0	0.0294311	0.00536508	0.0053631	0.00730476	0.00461905	0.0356786	0.0462225	0.0377894	0.0216494		0.0193423
27	XP_025269479.1-E2AJL7	0.00745779	0.0388113	0.0124946	0.0037381	0	0.0289448	0.0327739	0.0143607	0.0299483	0.021261		0.018979
95	XP_011259986.1-E2AKV6	0.00893994	0.0318927	0.0599345	0.0135	0	0.0040619	0.0238385	0.0155079	0.00523413	0.0252363		0.0188146
36	XP_025269126.1	0.0390664	0	0.0189996	0.0605459	0.0097395	0.00721268	0.00675	0.00823571	0.00791106	0.0284338		0.0186895
181	XP_011260992.1-E2AMW3	0	0.0335731	0.0303197	0.00562798	0.00910768	0.0360806	0.00362302	0	0.011375	0.0540016		0.0183709
216	XP_011256323.1-XP_011256322.1-XP_011256321.1-E2ADY7-E2ADY5	0.0906144	0.0393666	0	0	0	0	0.0125924	0.00582381	0.00466667	0.030112		0.0183176
309	E2ANE4-XP_011261213.1	0.0131539	0	0.0116714	0.0216664	0.0498978	0.00395238	0.0078666	0.0253501	0.0100096	0.0389445		0.0182513
59	XP_011264740.1-E2AVJ5	0.02415	0.00696154	0	0.00695238	0.00971314	0.0238847	0.0331433	0.0107738	0.00314643	0.0594451		0.017817
189	XP_019884913.1-XP_011266002.1-E2AY00	0	0.0394879	0.0377219	0	0.00654372	0	0.0273095	0.0557988	0.00530159	0.0053266		0.017749
234	XP_011263372.1-XP_011263370.1-E2ASS1	0	0.0313421	0.00754643	0.0118415	0.0425357	0.0107411	0	0.0210315	0.0351389	0.0136667		0.0173844
49	XP_011251688.1-E2A4X8	0.0492289	0.0331167	0.0069881	0	0.0206651	0.0132531	0.0184308	0.0116762	0	0.0182396		0.0171598
401	XP_025269493.1	0.0127231	0.00368571	0.057152	0.00439698	0.0255429	0.0118155	0.0059256	0.0270613	0	0.0219083		0.0170211
85	XP_025265943.1-E2AGD3	0.0220164	0.0281607	0.0123599	0	0.0406105	0.00550298	0.0202426	0	0.00944401	0.0263866		0.0164724
105	XP_011256347.1-XP_011256346.1-E2ADZ5	0	0.0224858	0.0604886	0.00809801	0	0	0	0.0628108	0.00881109	0		0.0162694
336	XP_025268998.1	0.012631	0.039475	0.00403571	0.00585979	0.00579545	0.00425	0.0436044	0.00578571	0.00728888	0.0339327		0.0162659
186	XP_011256209.1-E2ADT4	0.050038	0.0307528	0.00996784	0	0.0224226	0.0201976	0.0109511	0.0142182	0	0.0038842		0.0162432
332	XP_011260293.1-E2ALF0	0.0074881	0.100099	0.0300397	0	0	0.0101964	0	0	0.0119714	0		0.0159794
158	XP_025269062.1-E2AGL2	0	0.0270397	0.0258934	0	0.0154451	0	0.0700192	0	0.00513095	0.0154952		0.0159024
168	XP_025265142.1-XP_011265088.2-E1ZV36	0.00933492	0.00704762	0.019121	0.00527857	0.0113464	0.00980604	0.0391365	0.0181991	0.0162133	0.0226625		0.0158146
48	XP_011255281.1-E2AC28-E2AC29	0.0109574	0.0138667	0.0112092	0.0226028	0.00870833	0	0.0141163	0.0138976	0.0521075	0.00914286		0.0156609
174	E1ZYQ1-XP_025267158.1-XP_011266637.1-XP_011266629.1-XP_011266622.1	0.0321532	0.00392857	0.016975	0.00555	0.00536131	0	0.0419304	0.0204104	0.0219011	0.00684722		0.0155057
326	XP_011267679.1-E2B1G2-XP_011267678.1	0	0	0.058347	0	0	0	0.0556547	0.0182666	0	0.0207083		0.0152977
106	XP_011258566.1-XP_011258565.1-E2AIC5	0.068789	0.00661905	0.0326623	0.012272	0.00361538	0	0.00345879	0	0.0148179	0.00853463		0.0150769
415	XP_025264071.1-XP_025264070.1-XP_011255071.1-E2ABP4	0.0209345	0.0110571	0.00424084	0.0114048	0.0243881	0	0.0288696	0.00910476	0.0345738	0.00505013		0.0149624
133	E2A4U9-XP_019882208.1-XP_011251636.1-XP_011251639.2	0.00800595	0.0185595	0.0117048	0.0101857	0.0218571	0	0.0161112	0.0107503	0.00431548	0.042859		0.0144349
413	XP_025268334.1-XP_011256430.2-E2AE31	0	0	0	0.0132984	0.0184385	0.0406423	0.0719435	0	0	0		0.0144323
26	XP_011252309.2-E2A6E2	0.0693877	0.00580195	0	0.0202937	0.0168452	0.0147274	0.0079246	0.00483059	0	0.004125		0.0143936
108	XP_011252356.1-E2A6I4	0	0.00709799	0.0332454	0.0346402	0.0124048	0.0110762	0.00732143	0.00814206	0.0243087	0.00473095		0.0142968
93	XP_011254034.1-E2A9P3	0.0214965	0.00730075	0.00653195	0.0268667	0	0.0115476	0.00971429	0.0225945	0.0276634	0.00649874		0.0140214
384	XP_011253906.1-E2A9D3	0.0200168	0	0.00464706	0.0369405	0.0275462	0.0251586	0	0	0.0173641	0.00842546		0.0140099
147	XP_019884712.1-XP_011264422.1	0.0475198	0.0147688	0.00587183	0	0.025335	0.0343553	0	0	0.0066	0.00534683		0.0139798
237	XP_011255135.2-E2ABV2	0.0226467	0.0183496	0.0156755	0.00458571	0	0	0.00603571	0	0.0317214	0.040131		0.0139146
481	XP_011253128.1-E2A7Y2	0.0943787	0.00845238	0	0	0.00376269	0.0118364	0.00581429	0.00998413	0	0.00434405		0.0138573
154	XP_011265213.1-E2AWC1	0.0408008	0	0.0106815	0.0356353	0.0101921	0.00392857	0.0152571	0.00720879	0	0.0141491		0.0137853
78	XP_011256478.1-E2AE51	0.0338669	0.0250714	0	0.0371568	0	0.0139278	0.0038881	0.00518182	0.0137411	0.00444643		0.013728
209	XP_011263888.2-E2ATY3	0.010381	0.00430714	0.00817411	0.00369127	0	0.0166017	0.0172615	0.0172143	0.0478075	0.0112265		0.0136665
317	XP_011263650.1-E2ATD7	0.0440061	0	0.0037619	0.0224384	0.00511905	0.00442857	0.0040619	0.0132884	0	0.0376689		0.0134773
128	XP_011251922.1-XP_011251921.1-E2A5G4	0.0180655	0.0159614	0	0.0194092	0.0232113	0.0113037	0	0.00472857	0.0203	0.021111		0.0134091
111	XP_011263402.1-E1ZY32	0.0271226	0.0126401	0	0.0221077	0.00825108	0.00832348	0.0307065	0.00919697	0.0133196	0		0.0131668
69	XP_011252428.1-E2A6N1-XP_025262425.1-XP_011252154.1-XP_011252142.1-E1ZVV0-E1ZVU9-XP_025262454.1-XP_025262453.1-XP_025262452.1-XP_025262451.1	0.0272609	0.033436	0.0150536	0.00970779	0	0.0152015	0	0	0.00410238	0.0262321		0.0130994
122	E2A5R3-XP_011252033.1-XP_011252032.1-XP_011252034.1-XP_011252062.1	0.0155242	0.0300635	0.00637465	0.00890476	0.00917698	0.00583333	0	0.00895238	0.0287495	0.0169058		0.0130485
83	XP_025265223.1-XP_025265222.1-XP_025265221.1	0.00872381	0.0188024	0.0397067	0.020169	0.00556818	0.0147148	0.00795238	0.00485119	0.00797143	0		0.012846
251	XP_011256281.2-E2ADW9-E2ADX0-XP_025262684.1-XP_025262685.1-XP_025262693.1-E2ADW3	0	0.0642189	0.0171667	0	0	0.0210219	0.00585714	0.00528571	0.00846703	0.00566729		0.0127685
129	XP_019883740.2-E2AKK9	0.0139383	0.0159306	0.00850794	0.0119362	0	0.0297343	0.00573654	0.0184439	0.00388095	0.0179917		0.01261
248	XP_011265933.1-XP_011265930.1-E2AXR8	0	0.0594141	0.0473745	0	0	0	0.00935714	0.00991723	0	0		0.0126063
236	XP_011255915.1-XP_011255908.1-XP_011255898.1-XP_011255881.1-E1ZWM5	0.0135445	0.00465476	0.00414286	0	0.0109333	0.0265065	0.011321	0.0143876	0.0101905	0.0268723		0.0122553
73	E2ARJ0-XP_011262743.2	0	0.0208743	0.0158786	0.0192446	0.00587698	0	0	0.0207381	0.00858036	0.0311034		0.0122296
35	XP_011255300.1-E2AC60	0.0170524	0.0244104	0.032416	0	0.0074881	0	0.00713025	0.0109206	0.0103333	0.0124231		0.0122174
62	XP_025269114.1-XP_025269111.1-XP_025269110.1-XP_025269109.1-XP_025269112.1-XP_025269117.1-XP_025269116.1-XP_025269113.1-XP_025269115.1-E2ARB3-E2AEH5-E2AEH6	0	0.0159717	0.0124696	0.00374428	0.0240119	0.0110548	0.00851885	0.0109214	0.0224728	0.0125216		0.0121687
265	E2B271-XP_011268025.2	0.0210222	0.00809524	0.0111389	0.00473179	0.0138282	0	0.0190798	0.00337034	0.017613	0.0207088		0.0119588
61	XP_025263365.1	0.00358929	0	0.0295128	0.0130536	0.0053663	0.0128762	0.00447161	0.00577289	0.0228354	0.0208678		0.0118346
146	XP_019884788.1-XP_019884801.1-XP_019884800.1-XP_019884798.1-XP_011265227.1-XP_019884796.1-XP_019884794.1-XP_019884790.1-XP_019884789.1-XP_019884786.1-XP_019884785.1-XP_025267686.1-XP_019884802.1-XP_025267684.1-XP_019884792.1-XP_019884791.1-XP_019884787.1-XP_019884803.1-XP_025267682.1-XP_019884793.1-XP_025267685.1	0.0258631	0.00850238	0.0186275	0.00519444	0.0181381	0.0044011	0.00415476	0.00996884	0.00355905	0.017384		0.0115793
155	E2A4N5-XP_011251529.2	0	0.00457143	0.0306754	0.00792857	0.00958333	0.0353405	0.0103143	0.00930844	0	0.00776864		0.0115491
257	XP_011258820.1-E2AIU9	0.0176723	0.013981	0.027279	0	0.00541094	0.0434759	0	0.00369188	0	0.00371905		0.011523
240	XP_011254633.1-E2AAT2	0	0.00662955	0.0349556	0.0196556	0.00807143	0.00470476	0.0300679	0.00552348	0.00422619	0		0.0113834
241	E2A3I0-XP_011250877.1-XP_011250876.1-XP_011250875.1-XP_011250874.1	0.02255	0	0	0.0112328	0.034236	0.00599802	0.00523132	0.0172864	0.0165819	0		0.0113117
184	XP_025263927.1-XP_019885078.1-E2AZT4-XP_011266928.1	0	0	0.0283793	0	0.0291259	0	0	0.0154055	0	0.0392805		0.0112191
148	XP_011250693.1-E2A358	0.025681	0	0.00712675	0	0.0174058	0.0198469	0.0190966	0	0.0139018	0.00567857		0.0108737
51	XP_011269703.1-XP_011269702.1-E2A252-XP_011257369.1-XP_011257368.1-XP_011257367.1-E2AFT7	0.0187406	0.00443773	0	0.0117113	0.00674286	0.00332143	0.0092256	0.0123482	0.0140601	0.0269252		0.0107513
99	XP_011253127.1-XP_011253125.1-E2A7Y1-XP_025266675.1-XP_011253124.1	0.00583532	0.042063	0	0.00817995	0	0.0217762	0.00515344	0.0115607	0.00824648	0.003875		0.010669
137	XP_011257938.1-E2AH16	0.0117923	0.0045619	0.00603431	0.0403479	0	0.0143842	0.00408874	0.00763761	0.00487302	0.0116095		0.0105329
404	XP_011258665.1-E1ZX82-XP_011265369.1-E2AWS1	0.00612531	0.0352836	0.032769	0.00726905	0	0.0102429	0.00370455	0	0.00864854	0		0.0104043
373	XP_011253770.2-E2A938	0.00914286	0	0.0154405	0.00487857	0.00340666	0.00440476	0.0169595	0.0122619	0.00747665	0.029147		0.0103118
247	E2AYS3-XP_011266404.2	0	0	0.0169426	0.00632143	0.00508442	0.00365828	0.0279861	0.0102286	0	0.0318762		0.0102098
71	XP_011254210.2-XP_011254209.2-E2AA04	0.00392857	0.0288342	0.00893452	0.00901576	0.00758731	0.0050875	0	0.00492857	0.0180684	0.0155998		0.0101985
92	XP_019882849.1-E2AB23	0.00648778	0.0337898	0.00811905	0.00353571	0	0	0.0149206	0.0163393	0.0183939	0		0.0101586
177	XP_011251109.1-E2A3W4	0.0130099	0.00823883	0	0.0109724	0.0108896	0.00623571	0.00314286	0.0269729	0	0.021525		0.0100987
400	XP_011256502.1-E2AEA4	0.0234132	0.00428571	0.00386905	0.00669588	0.00331429	0	0.0169988	0.0351472	0.00341429	0.00366071		0.0100799
213	XP_025270637.1-XP_011269375.2-XP_011269374.2-E2A1F2-XP_025270580.1-E2A1F3-XP_025270579.1-XP_025270578.1	0	0.0174597	0.0100632	0.0318158	0.00393651	0.0070687	0.0191123	0	0.00672143	0.00457639		0.0100754
42	XP_025264613.1	0.00971429	0.00854167	0	0.0044357	0.00590041	0.0312866	0	0.020338	0.0202321	0		0.0100449
50	XP_025265121.1-E1ZWT6	0.00386786	0.0152564	0.0359672	0.00663828	0.0106601	0.0119205	0.00456364	0	0.00483333	0.00671104		0.0100418
153	XP_019885340.1-E1ZZ64-E1ZZ62	0	0	0.00535714	0.0121267	0.00724603	0	0.047699	0.013848	0.00641729	0.00762465		0.0100319
395	XP_011252466.1-E2A6R7-XP_011252465.1	0	0.0257342	0.0409253	0	0	0.0243869	0	0	0.00908571	0		0.0100132
256	XP_025267906.1	0.00350336	0	0.0151395	0.0192967	0	0.0039856	0	0.00858294	0	0.0494688		0.00999769
143	XP_025270281.1-XP_019883853.1-XP_011260498.1-E2ALT1	0.00359921	0.00370022	0.0274538	0.0171837	0.00842857	0.012946	0.00540196	0	0.0151233	0.00466234		0.0098499
40	XP_011267533.1-XP_011267532.1-XP_011267531.1-E2B153	0	0	0.0317946	0	0	0.00533036	0.00393056	0.00926515	0.00757937	0.0393498		0.00972499
190	E2AXM8-XP_011265872.1	0.0187081	0	0	0.0105238	0.0177401	0	0.034618	0.0111429	0.00411264	0		0.00968455
337	XP_011259637.1-E2AK65	0	0.0246429	0	0.0283036	0	0	0.033327	0	0.01	0		0.00962734
338	E1ZV08-XP_025271395.1-XP_011260504.1-XP_011260421.1	0.0144242	0	0.00507656	0.00892962	0	0	0.00455952	0.0218411	0.0362879	0.00437698		0.00954959
163	XP_011260972.1-E2AMV4	0	0.0157548	0	0	0.030428	0.0230476	0.00795811	0.00440873	0.00764014	0.00528874		0.00945261
235	XP_025262778.1-XP_025262777.1-XP_025262798.1-E1ZXT8	0.00921573	0.00479212	0.0174143	0.0100969	0	0.0127801	0.00992802	0.00913982	0.00520986	0.0157448		0.00943216
275	E2B223-XP_011267952.3	0	0.00834034	0.0410499	0	0	0.0209762	0.00527738	0.0182095	0	0		0.00938533
433	XP_011255213.1-XP_011255212.1-XP_025267753.1-E2ABZ0	0.0118393	0.00382857	0.00854315	0.0223537	0.00472738	0.0102356	0.00534762	0.0195952	0.00714662	0		0.00936172
201	XP_011254033.1-E2A9P2	0	0.00267381	0.0286532	0	0.0408388	0	0.00875119	0.0122459	0	0		0.00931629
80	E2B227-XP_011267964.1	0.0290173	0.00461905	0.00385714	0.0137381	0.0225866	0.00466737	0	0.00912262	0.0055105	0		0.00931187
25	E2AC94	0.0146566	0.0227608	0	0.00613708	0.013686	0.0107095	0.0104093	0.00988929	0.00419987	0		0.00924485
302	XP_011269506.1-E2A1Q0	0.0241246	0.00431777	0	0.00406656	0.00561905	0	0.020681	0.0122196	0.0199185	0		0.00909471
289	E2ABA5-XP_025269147.1-XP_011254839.1-XP_011254838.1-XP_011254837.1	0.0219718	0	0	0.00928902	0.00424459	0.00988042	0.032782	0	0	0.012619		0.00907869
285	E2ALU3-XP_019883849.2	0.00436147	0.0197579	0.0115836	0.0144359	0	0.00649405	0.0115564	0	0.0219496	0		0.0090139
91	XP_011264019.1-E2AU75	0.0151342	0.00802083	0.00500019	0.0078489	0.00541667	0.00667143	0.0039137	0.0229053	0.0083782	0.00647619		0.00897656
362	XP_011260561.2-XP_011260560.2-E2ALY1	0.00675159	0	0	0.0362514	0.00715476	0.00794643	0	0.0207883	0	0.0108668		0.00897592
39	XP_025262246.1	0	0.0123104	0.0130773	0.0309567	0.0053881	0	0.00865	0	0.0049329	0.0140877		0.0089403
88	XP_011267538.1-E2B155	0.00544264	0.022974	0.0218745	0.0211169	0.0106286	0.0069494	0	0	0	0		0.0088986
283	XP_011268669.1-E2A057	0	0.0102071	0	0.0171015	0	0	0.0189286	0.00666825	0.0163738	0.0195145		0.00887938
29	XP_011253495.1-E2A8P0	0.0073254	0.0132571	0.00901587	0.00473214	0	0.00559048	0.0134411	0.00847825	0.0113143	0.0153732		0.00885279
215	XP_011264961.1-XP_011264960.1-E2AVX9	0	0.018389	0.0161369	0.003	0	0.0201856	0.0193071	0.004875	0	0.0061594		0.0088053
28	XP_011261898.2	0.0106286	0	0.0276262	0.0141341	0.00375397	0	0.0153752	0.010626	0.00553095	0		0.0087675
223	XP_011258099.1-E2AHG1	0	0.00491071	0	0.0214468	0.0196269	0.0224286	0.0189886	0	0	0		0.00874017
113	XP_025270228.1-E2AA82-E2AA81	0.0126386	0.00428664	0.00497161	0.0149008	0.00394048	0.00491369	0.0143353	0.0074652	0.0156004	0.00345238		0.0086505
245	XP_011268722.1-XP_025270978.1-XP_025270976.1-E2A0C4-XP_025270977.1	0	0.0149429	0.0515738	0	0	0	0	0.00664202	0.00916891	0.00396429		0.00862919
167	XP_011267621.1-E2B1B7	0.00652698	0.0110546	0.0247178	0.0109706	0.0126704	0.00728782	0.00415238	0.00320872	0.00527381	0		0.00858631
253	XP_025265208.1-E2AL32	0	0.0358654	0	0	0.0139612	0	0.0172437	0	0.0177976	0		0.00848679
239	XP_011261969.2-E2APZ5	0	0	0	0.0259668	0	0	0.00478571	0.0157321	0.0225518	0.0155429		0.00845794
280	XP_011266663.1-E2AZ96	0.01972	0.00396429	0.00874237	0	0.0191589	0.00371809	0	0.019526	0.00483333	0.00428571		0.00839487
422	XP_011251574.1-E2A4R0-XP_011251573.1	0.00887143	0	0.00617033	0	0.0172164	0	0.00780952	0.0145857	0.0290849	0		0.00837383
162	XP_025268350.1-E2AGJ5-E2AGJ4-REV__XP_019883532.1-REV__E2AI05	0	0	0.0467147	0.0205821	0	0	0.00495556	0.00358571	0.0036373	0.00353947		0.00830149
70	XP_011255318.1-XP_011255317.1-E2AC71	0.00412302	0.0124119	0.012331	0.0304162	0	0	0	0.00941066	0	0.0136286		0.00823213
300	XP_025267081.1-XP_011269145.1-XP_011268884.1-E1ZUV1	0.0129752	0.0100952	0.0124845	0	0.00367857	0.00755952	0.00611905	0	0.0145714	0.0141		0.00815834
292	XP_011251246.1-E2A429-XP_011251245.1-XP_011251244.1	0.00260714	0.0309772	0	0.00671429	0	0	0.00789286	0.017026	0.0109181	0.00535238		0.00814879
132	XP_025268689.1-E2A0E3-E2A0E2	0.01175	0.00749451	0	0.00503571	0	0.00721233	0	0.0234398	0.0132782	0.0132619		0.00814725
115	XP_011265309.2-E2AWK6	0.00571429	0	0	0.0046381	0	0	0.0500106	0	0.0145455	0.0062619		0.00811704
314	XP_011254474.1-E2AAH6	0.00346429	0.0108762	0.0109687	0.00885	0.00630476	0.0146181	0.0179748	0.00567857	0	0		0.00787354
268	E2A9Z9-XP_025264106.1-XP_011254200.2-XP_025264105.1-XP_025264104.1	0	0	0.00433095	0.0320507	0	0	0.0289434	0	0.0130584	0		0.00783835
54	XP_019882348.2-E2A6E1	0	0	0.0565381	0.00642198	0.00446429	0	0	0	0.00489286	0.00551007		0.00778273
118	E2AFA5-XP_011257049.1-XP_011257048.1	0.00455	0.00466429	0	0	0	0	0.00611706	0	0.0606196	0		0.00759509
288	XP_011258055.1-E2AHA9	0	0.0212321	0	0.0180671	0.00709203	0.00316224	0	0.0163905	0.00405714	0.00518956		0.00751907
255	XP_011251061.1-E2A3T5	0	0.00759045	0.00908783	0.0122411	0	0.0118317	0	0.00871429	0.0257175	0		0.00751828
270	XP_019883361.1-XP_019883360.1-E2AGJ7-XP_011257718.1	0.00469697	0.00556525	0	0.0288	0	0	0	0.0166125	0.00721429	0.0112857		0.00741748
452	XP_011264203.1-E2AUL5	0.0161114	0.0037381	0	0	0.00789881	0.00959184	0.0105291	0.00934594	0.00729832	0.0088283		0.00733418
20	XP_011259278.2-E2AJM0-E2ANU0	0.0128357	0.0091266	0.0101452	0	0.00417069	0.00505	0.00415861	0	0.0105127	0.0170556		0.00730551
203	XP_025269686.1-XP_011266030.1-E2AY69	0.00449121	0.0139714	0.00561905	0.0127345	0.0287369	0	0	0	0.004	0.00345714		0.00730103
357	XP_025268915.1-XP_011252288.1-XP_011252287.1-E2A6B9	0	0	0	0	0.0199571	0.00758929	0.0370253	0.00807143	0	0		0.00726431
56	XP_019884420.2	0.0228178	0.00461401	0	0.0100297	0.00439286	0.0160957	0.00827656	0	0.00615414	0		0.00723808
233	XP_025264462.1-XP_025264460.1-XP_025264459.1-XP_025264457.1-XP_025264453.1-XP_025264446.1-E2AB22	0.00947975	0.0177571	0.00400108	0.0292397	0	0	0	0.0101929	0	0		0.00706705
150	XP_011251814.1-E2A5A3	0.0094	0	0.0184686	0	0.00543783	0	0	0	0.00686134	0.030102		0.00702697
351	XP_025269390.1-XP_025269389.1-XP_025269388.1-E2AYP1-XP_025269385.1-XP_025269384.1-XP_025269383.1-XP_025269382.1-XP_025269386.1	0	0.0116786	0.00698214	0	0	0	0.0256303	0.0085276	0.0174107	0		0.00702294
76	XP_011256104.1-E2ADN0	0.0116488	0.00801727	0.0216505	0	0.0074967	0.00527619	0.00466429	0.00659592	0.00457582	0		0.00699255
329	XP_011255229.1-XP_011255228.1-E2ABZ4-E2ABZ3	0	0	0	0.00754762	0	0.015619	0.0466042	0	0	0		0.00697709
125	XP_011266190.1-E2AYB4	0.0260357	0.00928968	0	0.0163143	0	0.00542917	0.00280907	0.00830357	0	0		0.00681815
9	E2AZ59-XP_011266628.1	0	0	0.00564286	0.00651481	0.00923275	0	0.0330073	0	0.0133475	0		0.00677452
152	XP_011261591.1-E2AP90	0	0.00794435	0.0049944	0.00432143	0.00724286	0.00506933	0	0.00712698	0.020746	0.0101071		0.00675525
291	XP_011269819.1-E2A2D1	0.013632	0	0.00430195	0	0	0.00445833	0.0283124	0	0.00834286	0.00819966		0.00672472
165	XP_011260686.2-E2AM68-E2AM67	0	0.00402198	0.00490401	0	0.00757801	0.00347321	0.0120722	0.00374029	0.0304172	0		0.00662069
173	XP_019882645.2-E2A931	0	0.0173423	0.00947619	0	0.0181973	0.0087451	0.00672619	0.00504762	0	0		0.00655347
109	XP_025268048.1	0.0171099	0	0.00457857	0.0137571	0.0297259	0	0	0	0	0		0.00651715
214	XP_011250812.1-E2A3F2	0	0	0	0	0	0	0.00328247	0.0112591	0.0402869	0.00923571		0.00640642
425	XP_011261314.1-E1ZXM8	0.0103571	0.00807878	0	0	0	0.0034881	0	0.0142041	0.0277155	0		0.00638436
242	E2AGQ0	0.00670238	0	0.00460417	0.0058254	0	0.00483333	0.00845678	0.0067437	0.0123319	0.014233		0.00637307
420	XP_011267555.1-E2B171-XP_011267554.1	0	0	0	0.0202054	0.00657143	0	0	0	0.012125	0.0238206		0.00627224
299	XP_011252204.1-E2A665	0	0.0278	0	0.0150036	0	0	0.0120898	0	0.0067044	0		0.00615978
41	E2AQI6-XP_011262241.1-XP_011262243.1-XP_011262250.1-XP_019884226.1-XP_011262249.1-XP_011262248.1-XP_011262247.1-XP_011262246.1-XP_011262245.1-XP_011262244.1	0	0.00380238	0.0113538	0.013652	0.00425105	0.00381169	0.009	0.0059458	0.00484944	0.00448155		0.00611478
343	XP_025266115.1-XP_025266112.1-XP_011258258.1-XP_011258256.1-XP_025266109.1-XP_011258255.1-E2AHP8	0.019119	0	0.0097619	0.00942857	0	0.0109196	0	0.00948016	0	0		0.00587093
297	E2ARB2-XP_011262616.1-XP_011262620.1-XP_019884311.1-XP_019884310.1-XP_019884308.1-XP_019884307.1-XP_019884306.1-XP_011262619.1	0.00715476	0.00945417	0	0.003837	0.00715789	0	0.0102214	0	0	0.0198585		0.00576838
84	XP_011255085.1-E2ABQ6	0	0	0	0.00726063	0.0129071	0	0.024307	0.00358929	0	0.00888393		0.0056948
30	XP_019882306.1-E2A5W9	0	0	0.00883263	0	0	0.0118028	0.00939286	0.00651825	0	0.0202845		0.0056831
320	XP_025270750.1-XP_025270749.1-XP_025270592.1-XP_025270591.1-E2AJP1-E2B077-E2AT48	0	0	0.00414361	0.00890693	0	0.00887917	0.0100357	0.00425251	0.00540179	0.0150585		0.00566783
398	XP_011256968.1-E2AF24	0.0209211	0	0.00660577	0	0.00965159	0	0.0134304	0	0	0.00597802		0.00565869
346	E2ABB7-XP_025262434.1-XP_025262433.1-E2AAW0-XP_011254668.2-XP_025263358.1-XP_025263357.1-XP_011260570.1-XP_025263356.1-XP_011260569.1-XP_011260568.1-E2ALY5-XP_011260567.1	0.0117571	0	0	0.00473333	0	0.009	0	0.00975134	0.020829	0		0.00560708
277	XP_011253192.1-E2A7Z9	0	0.0101089	0	0	0.0126429	0.00479762	0.0277827	0	0	0		0.00553321
32	XP_011261399.1-E2ANT2	0.00636797	0.0226413	0.00329683	0.00784834	0	0	0	0.00375496	0.00535714	0.00572619		0.00549928
323	E1ZXZ8-XP_011262891.1	0	0.0160952	0	0	0.00739881	0	0.0155882	0	0.0153095	0		0.00543918
175	XP_011255562.2	0.00736848	0	0.00524245	0.0224543	0	0	0.0100238	0	0.00900635	0		0.00540954
243	E2B1C8-XP_011267643.2	0.00754365	0.0064998	0	0	0.0110786	0	0.010166	0.00567674	0.0129169	0		0.00538816
225	XP_019883321.1-E2AG54	0.0127287	0	0	0	0.00698095	0	0.0092423	0.00467857	0.0120087	0.00533095		0.00509702
316	E2A6U2-XP_011252507.2	0.0117032	0.0106527	0	0.00291793	0.00388668	0	0	0.0139937	0.00771429	0		0.00508685
434	XP_019883158.1-E1ZWT7	0.0129879	0	0	0	0	0.00446429	0.00382143	0.0180049	0	0.0115453		0.00508239
271	XP_011264753.1-E2AVK0	0	0.00343571	0	0.00867196	0	0.00424008	0.0170079	0.00602165	0.0112866	0		0.0050664
321	XP_011255834.1-XP_011255833.1-XP_011255832.1-E2AD28	0	0	0.00678571	0	0	0.0200952	0	0.00947682	0.0142227	0		0.00505805
226	XP_011251854.1-E2A5C4	0.00921429	0.0202815	0.00396861	0	0.0111429	0	0	0	0.00538095	0		0.00499882
377	XP_011253226.1-E2A849-XP_011253225.1	0	0	0.00446429	0.00421429	0	0.0265381	0.00892381	0.00491703	0	0		0.00490575
327	XP_011251155.1-E2A3Z5	0.0131147	0	0	0.00493651	0	0.00972198	0	0	0.0146998	0.00641387		0.00488869
264	XP_011254448.1-E2AAF9	0	0.00431937	0.0356571	0	0	0	0	0	0.00854762	0		0.00485241
217	E2A4Q4-XP_011251564.1	0	0	0	0	0.00844762	0.00716883	0	0.0152827	0.00393571	0.0135575		0.00483924
363	XP_011251474.1-E2A4J2	0	0.00831933	0.021	0.00480952	0.00490476	0	0	0	0.00504762	0.00409199		0.00481732
380	XP_011269382.1-E2A1F7	0	0	0.00431303	0.0301925	0	0	0	0	0.0123143	0		0.00468198
295	XP_025269642.1-E2AY85	0.00421085	0	0	0.00325755	0.00409461	0	0.00351905	0.017669	0.00768864	0.00611275		0.00465525
123	XP_011268046.1-E2B286	0.00687864	0	0.00602381	0.00538988	0.00989286	0.00643778	0	0	0	0.011774		0.0046397
290	E1ZVC0-XP_011269033.1	0	0	0.0203063	0	0	0.00406667	0	0	0.00350998	0.0183264		0.00462093
172	XP_025268258.1	0	0.00288175	0.00783929	0.00697024	0	0	0.00790317	0.0173423	0	0.00320577		0.00461425
77	XP_025270286.1-E1ZYU0-XP_011261436.3	0.00408333	0	0.00691429	0	0	0	0.00327619	0.00390476	0.0278048	0		0.00459833
389	XP_011261781.1-XP_011261780.1-E2APK9	0.0233095	0	0	0	0	0.00786071	0	0	0.0135635	0		0.00447337
444	XP_011253558.1-E2A8S3	0	0	0.00267857	0.013148	0	0.00366087	0	0.020698	0.00419841	0		0.00443838
121	XP_025263040.1-XP_025263125.1-XP_025263071.1	0.00350731	0.00880595	0	0.0209193	0	0.0055293	0	0.00558571	0	0		0.00443475
296	XP_011250832.1-E2A3G1	0	0	0.00500794	0	0.0108701	0.00518537	0	0.0217721	0	0		0.00428355
244	XP_011250985.1-XP_011250984.1-E2A3N8	0	0.00440476	0.010446	0.00416071	0.00666652	0	0	0	0.0125568	0.00389286		0.00421277
347	XP_011266221.1-E2AYF4-XP_011266222.1	0.00411905	0	0.00808929	0	0.00800986	0.00529365	0	0.013573	0.00279762	0		0.00418825
407	XP_011255976.2-E2ADD9	0.0179036	0.00600238	0	0	0	0	0.00653571	0	0	0.0113477		0.00417894
185	XP_011261154.1-XP_025264083.1-XP_025264079.1-XP_011261152.1-XP_025264076.1-E2ANA9	0.00884053	0.00752747	0.00959524	0	0	0	0	0.00722262	0.0054	0.00303328		0.00416191
405	XP_011254732.1	0	0	0	0	0	0.0413071	0	0	0	0		0.00413071
454	XP_011258400.1-XP_011258399.1-E2AI07	0	0	0.00716071	0.00381488	0	0.0072631	0.00468452	0.00420238	0.00930275	0.00430952		0.00407379
286	E2A6U3-XP_011252509.1-XP_011252508.1	0.00343012	0	0	0	0	0.0144245	0	0.00817647	0.0141667	0		0.00401978
334	XP_011261977.1-E2APZ9	0	0	0.0124821	0.00392857	0	0.0051979	0	0.00868571	0.00959524	0		0.00398896
390	XP_011251312.2-E2A452	0.00363095	0	0	0	0	0.00438476	0.0136178	0.00699325	0.0101548	0		0.00387815
319	XP_011269444.1-E1ZVE4-XP_011269460.1-XP_011269452.1	0.0095223	0	0	0.0107946	0	0	0.018342	0	0	0		0.00386589
358	XP_011251028.1-E2A3R3	0	0	0.00665476	0.00459921	0.00391667	0.00989014	0.0126381	0	0	0		0.00376989
274	XP_011268460.1-E1ZZT5	0.00631261	0.00497619	0.0129524	0.00496488	0	0	0	0	0.00761905	0		0.00368251
412	XP_019882578.1-XP_011253405.1-XP_011253404.1-XP_011253403.1-E2A8G5	0.00412338	0	0	0	0	0.00379605	0.00640476	0.0224269	0	0		0.00367511
306	XP_011253234.2-XP_011253233.2-XP_011253232.2-E2A880-XP_011253230.2-XP_011253229.2-XP_025265359.1-XP_011253238.1-XP_011253235.2-XP_011253236.1	0	0	0	0.00349188	0	0	0.00738571	0	0.0103542	0.0154286		0.00366603
252	XP_011269558.1-E2A1T0-XP_025262014.1	0	0	0	0	0	0	0.0364133	0	0	0		0.00364133
382	XP_011259829.1-E2AKH8	0.0124714	0	0.00887298	0.0103149	0.00371429	0	0	0	0	0		0.00353736
254	XP_011256137.1-E1ZWP1	0.0192467	0	0	0	0	0	0	0.00417857	0.0118442	0		0.00352694
224	XP_011260853.1-E2AMK4	0.00368254	0.00351429	0	0	0	0	0.0223292	0.00507143	0	0		0.00345975
149	XP_025267265.1-E1ZYQ6-E1ZYQ5	0	0	0.0057619	0	0	0	0.00599456	0.00417316	0.00771429	0.0106949		0.00343388
183	XP_011262417.1-E2AQX7-CON__ENSEMBL:ENSBTAP00000025008	0.00430952	0	0	0	0.00462662	0.00491905	0.00417857	0.00633929	0	0.0090242		0.00333973
443	XP_011253629.1-E2A8V7	0.00314286	0	0.0115714	0.0087289	0	0	0	0	0.00960495	0		0.00330481
457	XP_025269261.1-XP_025269260.1-E2AWP0-E2AUY7	0	0	0.016877	0	0	0.00484586	0.00340476	0.00443571	0	0.00328571		0.0032849
310	XP_011266198.2-E2AYC1	0.00491667	0	0	0	0	0	0	0.00883004	0.0145506	0.00371429		0.00320116
260	XP_025269241.1-E2AMU9	0.0038631	0	0	0	0.00289665	0.0146619	0	0	0.0105048	0		0.00319265
486	E2AJY8-XP_011259491.1-XP_011259490.1-XP_011259489.1-XP_019883681.2	0	0.00896537	0	0	0.00362546	0.00766639	0	0	0.011127	0		0.00313842
409	E2AZV5-XP_025263902.1-E2A2J4	0	0	0	0.00702381	0	0.02055	0	0	0.00357937	0		0.00311532
403	XP_011255476.1-XP_011255475.1-XP_011255474.1-E2ACH8	0.0085084	0.0118649	0	0.00604692	0	0	0	0.00357143	0	0		0.00299917
157	XP_011268777.2-E2A0E4	0	0	0	0.0116006	0	0	0	0.00484273	0	0.0126825		0.00291259
120	XP_011255639.1-E2ACR2	0	0	0	0.00493333	0	0	0	0.0134571	0.00946359	0		0.00278541
359	XP_011252980.1-E2A7M9	0.00425162	0.0198214	0	0	0	0	0.00370238	0	0	0		0.00277754
399	XP_011268790.1-XP_011268795.1-XP_011268794.1-XP_011268793.1-E2A0F3-XP_011268792.1-XP_011268791.1	0	0	0	0.00775425	0	0	0	0.00909828	0.010372	0		0.00272245
238	E2AMQ8-XP_025265046.1	0	0.00520802	0.00361676	0.00284286	0.00427489	0	0	0	0.0108315	0		0.0026774
227	XP_011254980.1-XP_011254979.1-E2ABH4-XP_011254978.1-XP_011254977.1	0.0225135	0	0	0	0	0	0.00394286	0	0	0		0.00264564
440	E2A0Q8-XP_011268952.1	0.00375658	0	0	0	0	0	0	0	0.0224911	0		0.00262477
378	XP_011264067.1-XP_011264068.1-E2AUA4	0	0.00819048	0	0	0	0	0.0101056	0	0	0.00768571		0.00259818
89	XP_011268819.2	0.00594286	0	0.00366667	0.00483333	0	0.0069	0	0.00416667	0	0		0.00255095
360	XP_011264968.2-E2AVY1-XP_019884608.2-E2AUE2	0.00500794	0.00667368	0	0.00392262	0	0	0	0.00484586	0.00488571	0		0.00253358
142	XP_011266940.1-E2AZU1	0	0	0.00398214	0	0	0.00869206	0.00333333	0	0.00916786	0		0.00251754
356	XP_011267566.2-E2B178	0.00395476	0	0	0.0172333	0	0	0	0	0.00389901	0		0.00250871
478	XP_011263180.1-XP_011263173.1-E1ZY18	0.00349527	0	0	0.00353571	0	0	0	0	0.00703571	0.0107387		0.00248054
350	XP_011263339.1-E2ASN8	0.0127143	0	0	0	0	0	0	0.012	0	0		0.00247143
282	XP_011253055.2-E2A7S3	0	0	0	0	0.0210179	0	0	0.00352381	0	0		0.00245417
312	XP_025265136.1	0	0	0	0	0	0	0.00889286	0	0	0.0149036		0.00237964
267	XP_011264946.1-E2AVX1	0.00393571	0	0	0.0106714	0	0	0.00446032	0	0.0041627	0		0.00232302
485	E2AP99-XP_011261605.2	0.0153587	0	0	0	0	0.00703571	0	0	0	0		0.00223944
308	XP_025270282.1-XP_011260493.3	0	0	0	0.0030514	0	0	0.00372802	0	0	0.0151451		0.00219245
342	XP_011264652.2-E2AVF4	0	0	0.00749524	0	0	0	0	0	0	0.0143439		0.00218392
410	XP_011269303.2-XP_011269302.2-XP_011269301.2-XP_011269299.2	0.00388474	0	0	0	0	0	0	0	0.0178091	0		0.00216938
328	XP_025271421.1-E2APS1	0	0	0	0	0.0215317	0	0	0	0	0		0.00215317
386	XP_011267731.1-XP_011267723.1-E1ZYZ4	0.014627	0.0031369	0	0.00334286	0	0	0	0	0	0		0.00211067
160	XP_011268535.1-E1ZZZ1	0.0036916	0	0	0.00455952	0.00764156	0.00476082	0	0	0	0		0.00206535
450	XP_011268143.2-E1ZZ63-XP_011268142.2-XP_011268139.2-E1ZZ67-E1ZZ66-XP_011268140.1-XP_011268141.1-E1ZZ65	0	0.00641227	0.0037013	0	0.00584769	0.00427381	0	0	0	0		0.00202351
396	XP_011265379.1-E2AWT0	0.0110166	0.00529365	0.00390179	0	0	0	0	0	0	0		0.0020212
394	XP_011258245.1-E1ZX53	0.00733913	0.0034026	0	0	0	0	0	0	0.00880714	0		0.00195489
232	E2AME3-XP_011260769.1	0	0	0	0	0	0	0.00573609	0	0.00692857	0.00631828		0.00189829
448	XP_025262700.1-XP_025262698.1-XP_025266100.1-XP_025262697.1-XP_025262696.1-XP_025262695.1-XP_025266099.1-E2ADX2	0	0	0	0	0	0	0	0.0115179	0.00744372	0		0.00189616
266	XP_011254456.1-XP_011254455.1-E2AAG3	0	0	0	0.0184599	0	0	0	0	0	0		0.00184599
127	E2A2D8	0	0	0	0	0.0175929	0	0	0	0	0		0.00175929
315	E2AMK0-XP_019883943.1	0.00446429	0	0	0.00531548	0.00304762	0	0	0.00475	0	0		0.00175774
446	XP_011266363.1-XP_011266362.1-XP_011266361.1-E2AYQ6	0.0174444	0	0	0	0	0	0	0	0	0		0.00174444
419	E1ZVB4-XP_011268973.1	0	0	0	0	0	0	0.0128125	0	0	0.0042996		0.00171121
335	XP_011264587.1-E2AVB1	0	0	0	0	0.00359164	0.00341071	0.0100196	0	0	0		0.0017022
144	XP_025265691.1-E2AD33	0.00607143	0	0	0.00515756	0	0	0	0	0	0.00413889		0.00153679
368	E2AP51-XP_011261492.1	0	0	0	0	0.00339881	0	0	0	0.0116638	0		0.00150626
387	XP_011259467.1-E2AJX9-XP_011259465.1	0.00390774	0	0	0.00685714	0	0	0	0	0.00385714	0		0.0014622
352	XP_011261151.1-E2ANA8	0	0	0	0.0145833	0	0	0	0	0	0		0.00145833
365	E2AXN0-XP_011265873.1	0	0	0	0.0145065	0	0	0	0	0	0		0.00145065
345	XP_025269810.1-XP_025269809.1-XP_025269808.1-XP_025269807.1-XP_025269806.1	0	0	0	0.010247	0.00377183	0	0	0	0	0		0.00140188
269	XP_011252045.1-E2A5M2	0.00482983	0	0.00386905	0	0.00450794	0	0	0	0	0		0.00132068
353	XP_011253726.1-XP_011253725.1-XP_011253724.1-XP_011253723.1-E2A915	0.00631818	0	0.00640476	0	0	0	0	0	0	0		0.00127229
475	XP_011255161.1-XP_011255160.1-E2ABW5	0	0	0	0	0.0120286	0	0	0	0	0		0.00120286
354	E2AYI3-XP_025268444.1-XP_025268446.1-XP_025268445.1	0	0	0	0.00745714	0	0	0.00390826	0	0	0		0.00113654
370	XP_011268780.1-XP_011268779.1-E2A0E7	0	0	0.00739524	0	0	0	0	0.00389286	0	0		0.00112881
333	XP_025267701.1-XP_025267700.1-E2AWG1	0	0	0.0111429	0	0	0	0	0	0	0		0.00111429
322	XP_011259060.1-E2AJ86	0	0	0	0	0	0	0	0.00602661	0	0.00425466		0.00102813
388	E2AMK3-XP_011260854.3	0.0102024	0	0	0	0	0	0	0	0	0		0.00102024
176	XP_011262653.1-E2ARD3	0	0	0	0	0	0	0.0100446	0	0	0		0.00100446
293	XP_019884752.1-XP_011265107.1-E2AW51-E2AW54	0.00317063	0	0	0.00680476	0	0	0	0	0	0		0.00099754
221	XP_011260804.1-E2AMH2	0	0.00933527	0	0	0	0	0	0	0	0		0.000933527
426	XP_025270581.1-XP_011269446.2-XP_011269445.2-E2A1K5	0.00911199	0	0	0	0	0	0	0	0	0		0.000911199
428	XP_025271105.1-XP_025271104.1-XP_025271103.1	0.004375	0	0	0	0	0	0	0	0	0.004625		0.0009
441	XP_025263257.1-E2AKU5-E2AKU6	0	0	0	0	0	0	0	0	0.00891823	0		0.000891823
212	XP_011260887.1-E1ZXK2	0	0	0	0	0.00469048	0	0.00419048	0	0	0		0.000888095
397	XP_011255877.1-E2AD64	0	0	0	0	0	0	0	0.00389469	0.00495238	0		0.000884707
445	XP_011268281.2-E1ZZG1	0	0	0	0	0	0	0.00584361	0	0.00279762	0		0.000864123
202	XP_011253554.1-E2A8R8-XP_011253553.1-XP_011253552.1	0	0	0.00838095	0	0	0	0	0	0	0		0.000838095
392	XP_011261604.1-XP_011261603.1-XP_011261602.1-XP_011261601.1-XP_019884096.1-E2AP98	0.00819048	0	0	0	0	0	0	0	0	0		0.000819048
427	XP_025263984.1-XP_025263983.1-XP_025263982.1-XP_011252554.1-XP_011252552.1-XP_025263981.1-XP_011252551.1-XP_019882397.1-XP_011252550.1-XP_011252545.2-E2A6V3-XP_011252548.1-XP_025263980.1-XP_011252547.1	0	0	0	0	0	0	0.00423571	0.0039127	0	0		0.000814841
193	XP_011261506.1-E2AP55	0.00382857	0	0	0	0	0	0	0	0.00400649	0		0.000783506
246	XP_011251040.1-XP_011251039.1-XP_011251038.1-E2A3S3-E2A3S0	0	0	0	0	0	0	0.00438095	0.00316827	0	0		0.000754922
376	XP_011250886.1	0	0	0.0034494	0	0	0	0.00379853	0	0	0		0.000724794
508	XP_011262424.1-E2AQY5	0	0	0	0	0	0	0.00716883	0	0	0		0.000716883
406	XP_011258211.1-E2AHR4	0	0.00703472	0	0	0	0	0	0	0	0		0.000703472
449	XP_025269140.1	0	0	0	0	0	0	0.00367381	0.00333333	0	0		0.000700714
432	XP_011260463.1-E2ALK0	0.00325	0	0	0	0	0	0	0	0.00364286	0		0.000689286
381	XP_025268059.1-XP_025268060.1-XP_011267296.2-E2AHZ0-E2AHY9-E2B0N7-E2AHZ2-E2AHZ1	0	0	0	0	0	0	0	0	0.00680952	0		0.000680952
230	E2AE72	0	0	0	0	0	0.00653571	0	0	0	0		0.000653571
480	XP_025262732.1-XP_025262731.1-E2ATE8-E2ATE6-REV__E2ACI4-REV__XP_011255486.1	0.00642857	0	0	0	0	0	0	0	0	0		0.000642857
476	XP_011268699.2-XP_011268698.2-E2A097-E2A096-E2AR74-XP_025264019.1-XP_011268697.2	0	0	0	0	0	0	0	0	0.00551429	0		0.000551429
195	XP_019884897.1-XP_011265919.1-XP_011265918.1-E2AXQ4-XP_025269153.1-XP_025269152.1	0	0	0.00531905	0	0	0	0	0	0	0		0.000531905
430	XP_011254592.1-XP_011254591.1-XP_011254590.1-E2AAQ1	0	0	0	0	0	0	0	0.00495238	0	0		0.000495238
464	XP_011264128.1-E2AUD9-XP_011264127.1	0	0	0	0	0	0	0.00470238	0	0	0		0.000470238
199	XP_025269243.1	0.00466667	0	0	0	0	0	0	0	0	0		0.000466667
437	XP_011265325.1-XP_011265324.1-E2AWL4	0	0	0	0	0	0	0	0	0.00420879	0		0.000420879
423	E2AKU3-XP_011259976.1	0	0	0	0	0	0	0	0	0.00390756	0		0.000390756
429	XP_025269497.1	0	0	0	0	0	0	0.00388095	0	0	0		0.000388095
471	XP_011262896.1-E2ART6	0	0	0	0	0	0	0	0	0.00369048	0		0.000369048
503	XP_011259539.1-E2AK02	0	0	0	0	0	0	0	0	0.0036461	0		0.00036461
498	XP_011265549.1-E2AX72	0	0	0	0	0	0	0.00364474	0	0	0		0.000364474
447	XP_019882165.2-XP_019882163.2-XP_019882164.2-XP_011251397.2-E2A4D2-XP_011251398.2	0.0035728	0	0	0	0	0	0	0	0	0		0.00035728
367	XP_011254716.1-E2AB03	0	0	0	0	0	0	0	0	0.00345536	0		0.000345536
482	XP_011254292.1-E2AA51	0	0	0	0	0	0	0	0	0.00338095	0		0.000338095
182	XP_011262389.1-E2AQV0	0	0	0	0	0	0	0	0	0	0.00297653		0.000297653
294	XP_011253803.1-E2A952	0	0	0	0	0	0	0.00294048	0	0	0		0.000294048
179	E1ZXZ4-XP_011255340.2	0	0	0	0	0	0	0	0	0	0		0
180	E2ABI5	0	0	0	0	0	0	0	0	0	0		0
196	XP_011266262.1-E2AYI4	0	0	0	0	0	0	0	0	0	0		0
219	XP_011262740.1-XP_011262739.1-E2ARI6-XP_011261103.1-E2AN64	0	0	0	0	0	0	0	0	0	0		0
222	XP_011254975.1-E2ABH3	0	0	0	0	0	0	0	0	0	0		0
228	XP_011262285.1-E2AQK2-XP_011262284.1	0	0	0	0	0	0	0	0	0	0		0
249	XP_011258106.1-E2AHG9-XP_011258105.1	0	0	0	0	0	0	0	0	0	0		0
263	XP_019884886.1-XP_011265840.1-E2AXL2	0	0	0	0	0	0	0	0	0	0		0
276	E1ZWT5	0	0	0	0	0	0	0	0	0	0		0
278	XP_011251352.1-E2A481	0	0	0	0	0	0	0	0	0	0		0
281	XP_011253560.1-XP_011253559.1-E2A8S5	0	0	0	0	0	0	0	0	0	0		0
284	XP_011259113.1-E2AJB5	0	0	0	0	0	0	0	0	0	0		0
301	E2AFY9-XP_011257447.1-XP_011257446.1-E2AFY8-XP_025268256.1-XP_025268255.1	0	0	0	0	0	0	0	0	0	0		0
311	XP_025262168.1-XP_011254489.2-E2AAI3	0	0	0	0	0	0	0	0	0	0		0
313	XP_011267949.1-E2B222	0	0	0	0	0	0	0	0	0	0		0
324	XP_011266432.1-E2AYU1	0	0	0	0	0	0	0	0	0	0		0
330	XP_011268840.2-E2A0I9-E2A0J0	0	0	0	0	0	0	0	0	0	0		0
339	E2A9I6-XP_025271362.1	0	0	0	0	0	0	0	0	0	0		0
340	E2A162-XP_011269204.1	0	0	0	0	0	0	0	0	0	0		0
349	XP_011264487.1-E2AV36	0	0	0	0	0	0	0	0	0	0		0
355	E2AJP0-XP_025266586.1	0	0	0	0	0	0	0	0	0	0		0
361	XP_011268673.2-E2A062	0	0	0	0	0	0	0	0	0	0		0
364	E2AQ44-XP_011262046.1	0	0	0	0	0	0	0	0	0	0		0
366	XP_025266972.1-XP_011259813.1-E2AKG6	0	0	0	0	0	0	0	0	0	0		0
369	XP_011263368.1-E2ASR9	0	0	0	0	0	0	0	0	0	0		0
372	XP_011261435.1-E1ZXN9	0	0	0	0	0	0	0	0	0	0		0
374	XP_011251576.1-E2A4R1	0	0	0	0	0	0	0	0	0	0		0
383	XP_011250989.1-E2A3P2	0	0	0	0	0	0	0	0	0	0		0
391	E2AXK1-XP_011265833.1	0	0	0	0	0	0	0	0	0	0		0
393	E2A1E3-XP_011269355.1	0	0	0	0	0	0	0	0	0	0		0
402	XP_011261487.1-E2AP46	0	0	0	0	0	0	0	0	0	0		0
411	XP_011269203.1	0	0	0	0	0	0	0	0	0	0		0
414	XP_025269698.1-E2AYW7-E2AYW6	0	0	0	0	0	0	0	0	0	0		0
416	XP_011265328.1-E2AWL6	0	0	0	0	0	0	0	0	0	0		0
417	XP_011254475.1-E2AAH7	0	0	0	0	0	0	0	0	0	0		0
418	E1ZZJ4-XP_011268367.1-XP_025268277.1-XP_011268365.1	0	0	0	0	0	0	0	0	0	0		0
421	E2AW15	0	0	0	0	0	0	0	0	0	0		0
424	XP_011253799.1-XP_011253800.1-XP_011253798.1-XP_011253797.1-XP_011253796.1-E2A949	0	0	0	0	0	0	0	0	0	0		0
431	E2AVZ2-XP_025264825.1	0	0	0	0	0	0	0	0	0	0		0
435	E2AX13	0	0	0	0	0	0	0	0	0	0		0
436	XP_019885551.1-E2A1P1	0	0	0	0	0	0	0	0	0	0		0
438	XP_011255975.2-XP_011255974.2-E2ADE0	0	0	0	0	0	0	0	0	0	0		0
439	XP_011263425.1-E2ASS7	0	0	0	0	0	0	0	0	0	0		0
442	XP_025270242.1-XP_011266579.1-XP_011266577.1-XP_011266576.1-XP_011266574.1-XP_011266573.1-E2AZ31-XP_025270240.1-XP_011266571.1	0	0	0	0	0	0	0	0	0	0		0
451	E2AEX0-XP_011256903.1-XP_011256902.1-XP_011256901.1-XP_025267590.1-XP_025267589.1-XP_025267588.1	0	0	0	0	0	0	0	0	0	0		0
453	XP_011269716.3-E2A226	0	0	0	0	0	0	0	0	0	0		0
455	XP_011255231.1-E2ABZ6	0	0	0	0	0	0	0	0	0	0		0
456	XP_011254364.2-E2AAA4	0	0	0	0	0	0	0	0	0	0		0
458	XP_025267422.1-XP_011268639.1-XP_011268638.1-XP_011268637.1-XP_011268636.1-XP_011268635.1-E2A040	0	0	0	0	0	0	0	0	0	0		0
460	XP_011255068.1-XP_011255058.1-E1ZWI0	0	0	0	0	0	0	0	0	0	0		0
461	XP_011259329.1-E2AJQ0	0	0	0	0	0	0	0	0	0	0		0
462	XP_011262105.1-E2AQ84	0	0	0	0	0	0	0	0	0	0		0
463	E2AF09-XP_011256937.1	0	0	0	0	0	0	0	0	0	0		0
465	XP_011264253.1-XP_011264252.1-XP_011264250.1-XP_011264249.1-E2AUK5	0	0	0	0	0	0	0	0	0	0		0
466	XP_011265518.2-E2AX17	0	0	0	0	0	0	0	0	0	0		0
467	XP_011263009.1-E2AS00	0	0	0	0	0	0	0	0	0	0		0
468	XP_025268062.1-XP_011263604.1-XP_011263603.1-XP_011263602.1-E2ATA4	0	0	0	0	0	0	0	0	0	0		0
469	XP_025268731.1-XP_025270891.1-XP_025265358.1	0	0	0	0	0	0	0	0	0	0		0
470	E2AB34-XP_011254761.1-XP_011254760.1-XP_011254759.1	0	0	0	0	0	0	0	0	0	0		0
473	XP_019883837.1-E2ALL5	0	0	0	0	0	0	0	0	0	0		0
474	XP_011252120.1-XP_011252111.1-E1ZVU8	0	0	0	0	0	0	0	0	0	0		0
477	XP_011266509.1	0	0	0	0	0	0	0	0	0	0		0
479	XP_011265593.1-XP_011265592.1-E2AX30	0	0	0	0	0	0	0	0	0	0		0
483	E2AD19-XP_011255813.2-XP_025265625.1	0	0	0	0	0	0	0	0	0	0		0
484	XP_019882541.1-E2A827	0	0	0	0	0	0	0	0	0	0		0
487	XP_011252069.2-E2A5S9-E2A5S6	0	0	0	0	0	0	0	0	0	0		0
488	E2A9H0-XP_025268177.1-XP_025268171.1	0	0	0	0	0	0	0	0	0	0		0
489	XP_011254690.1-XP_011254689.1-XP_011254688.1-XP_011254687.1-E2AAW9-XP_025271158.1	0	0	0	0	0	0	0	0	0	0		0
490	XP_011259910.2-E2AKQ7	0	0	0	0	0	0	0	0	0	0		0
491	XP_025269281.1	0	0	0	0	0	0	0	0	0	0		0
492	XP_011258637.1-E2AIH6	0	0	0	0	0	0	0	0	0	0		0
493	XP_025270484.1-XP_011267484.1	0	0	0	0	0	0	0	0	0	0		0
494	E2AY08-XP_025269779.1	0	0	0	0	0	0	0	0	0	0		0
495	E2A4H1-XP_025265505.1	0	0	0	0	0	0	0	0	0	0		0
496	E2A6H4	0	0	0	0	0	0	0	0	0	0		0
497	XP_011259014.1-E2AJ62	0	0	0	0	0	0	0	0	0	0		0
499	XP_025264561.1-XP_025264562.1	0	0	0	0	0	0	0	0	0	0		0
500	E1ZYX6-XP_025268105.1-XP_011267329.1-XP_019884989.1-XP_019884987.1	0	0	0	0	0	0	0	0	0	0		0
501	XP_011269826.1-E2A2D3-XP_011269825.1-XP_011269824.1	0	0	0	0	0	0	0	0	0	0		0
502	E2AMU0-XP_011260960.1-XP_011260959.1	0	0	0	0	0	0	0	0	0	0		0
504	XP_011269400.1-E2A1H1	0	0	0	0	0	0	0	0	0	0		0
505	XP_011251816.2-E2A5A6	0	0	0	0	0	0	0	0	0	0		0
506	XP_011263221.1	0	0	0	0	0	0	0	0	0	0		0
507	XP_011264788.2-XP_025265583.1-XP_019884711.1-XP_011264789.1-XP_019884710.1-XP_011264791.1-XP_011264783.2-XP_011264786.1-XP_011264785.1-E2AVQ2-XP_011264782.1	0	0	0	0	0	0	0	0	0	0		0
509	XP_011256604.1-E2AEC2	0	0	0	0	0	0	0	0	0	0		0
510	XP_025271294.1	0	0	0	0	0	0	0	0	0	0		0
511	XP_025266938.1-XP_025266937.1	0	0	0	0	0	0	0	0	0	0		0
512	XP_025263893.1-XP_011264552.1-E2AV98	0	0	0	0	0	0	0	0	0	0		0
513	XP_011265967.1-E2AXV8	0	0	0	0	0	0	0	0	0	0		0
514	XP_025267687.1-E2AWE3	0	0	0	0	0	0	0	0	0	0		0
515	XP_025268117.1	0	0	0	0	0	0	0	0	0	0		0
516	E2A701	0	0	0	0	0	0	0	0	0	0		0
517	XP_019885069.1-E2AZP4-E2AZP6	0	0	0	0	0	0	0	0	0	0		0
518	XP_011254794.1	0	0	0	0	0	0	0	0	0	0		0

## Sheet: RF - NvS
	col_name	feature_importance_vals	feature_importance_vals	feature_importance_vals	feature_importance_vals	feature_importance_vals	feature_importance_vals	feature_importance_vals	feature_importance_vals	feature_importance_vals	feature_importance_vals
159	XP_011268452.1-E1ZZT0	0.276702	0.276702	0.276702	0.276702	0.276702	0.276702	0.276702	0.276702	0.276702	0.276702		0.276702
248	XP_011265933.1-XP_011265930.1-E2AXR8	0.268504	0.268504	0.268504	0.268504	0.268504	0.268504	0.268504	0.268504	0.268504	0.268504		0.268504
136	XP_011261310.1-XP_011261309.1-XP_011261308.1-XP_011261307.1-XP_011261306.1-E2ANL8	0.254422	0.254422	0.254422	0.254422	0.254422	0.254422	0.254422	0.254422	0.254422	0.254422		0.254422
203	XP_025269686.1-XP_011266030.1-E2AY69	0.244177	0.244177	0.244177	0.244177	0.244177	0.244177	0.244177	0.244177	0.244177	0.244177		0.244177
95	XP_011259986.1-E2AKV6	0.182665	0.182665	0.182665	0.182665	0.182665	0.182665	0.182665	0.182665	0.182665	0.182665		0.182665
39	XP_025262246.1	0.172334	0.172334	0.172334	0.172334	0.172334	0.172334	0.172334	0.172334	0.172334	0.172334		0.172334
390	XP_011251312.2-E2A452	0.164578	0.164578	0.164578	0.164578	0.164578	0.164578	0.164578	0.164578	0.164578	0.164578		0.164578
214	XP_011250812.1-E2A3F2	0.161235	0.161235	0.161235	0.161235	0.161235	0.161235	0.161235	0.161235	0.161235	0.161235		0.161235
20	XP_011259278.2-E2AJM0-E2ANU0	0.155088	0.155088	0.155088	0.155088	0.155088	0.155088	0.155088	0.155088	0.155088	0.155088		0.155088
123	XP_011268046.1-E2B286	0.150595	0.150595	0.150595	0.150595	0.150595	0.150595	0.150595	0.150595	0.150595	0.150595		0.150595
177	XP_011251109.1-E2A3W4	0.148035	0.148035	0.148035	0.148035	0.148035	0.148035	0.148035	0.148035	0.148035	0.148035		0.148035
97	XP_025267301.1-E2B0F9-XP_025264883.1-XP_025264884.1-E1ZYR2	0.146654	0.146654	0.146654	0.146654	0.146654	0.146654	0.146654	0.146654	0.146654	0.146654		0.146654
103	XP_019882595.1-E2A8M9	0.145933	0.145933	0.145933	0.145933	0.145933	0.145933	0.145933	0.145933	0.145933	0.145933		0.145933
28	XP_011261898.2	0.13931	0.13931	0.13931	0.13931	0.13931	0.13931	0.13931	0.13931	0.13931	0.13931		0.13931
7	XP_011252932.2-E2A7K7	0.136836	0.136836	0.136836	0.136836	0.136836	0.136836	0.136836	0.136836	0.136836	0.136836		0.136836
86	XP_011259459.2-E2AJX6	0.134997	0.134997	0.134997	0.134997	0.134997	0.134997	0.134997	0.134997	0.134997	0.134997		0.134997
40	XP_011267533.1-XP_011267532.1-XP_011267531.1-E2B153	0.131634	0.131634	0.131634	0.131634	0.131634	0.131634	0.131634	0.131634	0.131634	0.131634		0.131634
341	XP_025266198.1-XP_025266197.1-XP_025266196.1-XP_025266195.1-XP_019882760.2	0.131112	0.131112	0.131112	0.131112	0.131112	0.131112	0.131112	0.131112	0.131112	0.131112		0.131112
84	XP_011255085.1-E2ABQ6	0.129394	0.129394	0.129394	0.129394	0.129394	0.129394	0.129394	0.129394	0.129394	0.129394		0.129394
286	E2A6U3-XP_011252509.1-XP_011252508.1	0.125281	0.125281	0.125281	0.125281	0.125281	0.125281	0.125281	0.125281	0.125281	0.125281		0.125281
192	E2AV99-XP_011264553.1	0.122946	0.122946	0.122946	0.122946	0.122946	0.122946	0.122946	0.122946	0.122946	0.122946		0.122946
291	XP_011269819.1-E2A2D1	0.122486	0.122486	0.122486	0.122486	0.122486	0.122486	0.122486	0.122486	0.122486	0.122486		0.122486
178	XP_011262918.1-E2ARU3	0.117714	0.117714	0.117714	0.117714	0.117714	0.117714	0.117714	0.117714	0.117714	0.117714		0.117714
112	XP_011268522.1-E1ZZX0	0.116606	0.116606	0.116606	0.116606	0.116606	0.116606	0.116606	0.116606	0.116606	0.116606		0.116606
23	E2ALS8-XP_019883851.2	0.116215	0.116215	0.116215	0.116215	0.116215	0.116215	0.116215	0.116215	0.116215	0.116215		0.116215
252	XP_011269558.1-E2A1T0-XP_025262014.1	0.11603	0.11603	0.11603	0.11603	0.11603	0.11603	0.11603	0.11603	0.11603	0.11603		0.11603
256	XP_025267906.1	0.114873	0.114873	0.114873	0.114873	0.114873	0.114873	0.114873	0.114873	0.114873	0.114873		0.114873
30	XP_019882306.1-E2A5W9	0.114635	0.114635	0.114635	0.114635	0.114635	0.114635	0.114635	0.114635	0.114635	0.114635		0.114635
250	XP_011257276.1-E2AFM8	0.114589	0.114589	0.114589	0.114589	0.114589	0.114589	0.114589	0.114589	0.114589	0.114589		0.114589
240	XP_011254633.1-E2AAT2	0.111086	0.111086	0.111086	0.111086	0.111086	0.111086	0.111086	0.111086	0.111086	0.111086		0.111086
113	XP_025270228.1-E2AA82-E2AA81	0.106903	0.106903	0.106903	0.106903	0.106903	0.106903	0.106903	0.106903	0.106903	0.106903		0.106903
162	XP_025268350.1-E2AGJ5-E2AGJ4-REV__XP_019883532.1-REV__E2AI05	0.106665	0.106665	0.106665	0.106665	0.106665	0.106665	0.106665	0.106665	0.106665	0.106665		0.106665
191	XP_011251612.1-E2A4T7	0.105734	0.105734	0.105734	0.105734	0.105734	0.105734	0.105734	0.105734	0.105734	0.105734		0.105734
2	XP_025263096.1-XP_025263073.1-XP_025263075.1-E2B003	0.105278	0.105278	0.105278	0.105278	0.105278	0.105278	0.105278	0.105278	0.105278	0.105278		0.105278
104	E2AGG0-XP_011257663.3	0.104159	0.104159	0.104159	0.104159	0.104159	0.104159	0.104159	0.104159	0.104159	0.104159		0.104159
59	XP_011264740.1-E2AVJ5	0.101303	0.101303	0.101303	0.101303	0.101303	0.101303	0.101303	0.101303	0.101303	0.101303		0.101303
316	E2A6U2-XP_011252507.2	0.100213	0.100213	0.100213	0.100213	0.100213	0.100213	0.100213	0.100213	0.100213	0.100213		0.100213
370	XP_011268780.1-XP_011268779.1-E2A0E7	0.100037	0.100037	0.100037	0.100037	0.100037	0.100037	0.100037	0.100037	0.100037	0.100037		0.100037
166	XP_011257750.1-E2AGM0-E2A8L3-XP_011253498.1	0.097911	0.097911	0.097911	0.097911	0.097911	0.097911	0.097911	0.097911	0.097911	0.097911		0.097911
63	E2AFL0-XP_011257234.1-XP_011257235.1	0.0950505	0.0950505	0.0950505	0.0950505	0.0950505	0.0950505	0.0950505	0.0950505	0.0950505	0.0950505		0.0950505
78	XP_011256478.1-E2AE51	0.0947473	0.0947473	0.0947473	0.0947473	0.0947473	0.0947473	0.0947473	0.0947473	0.0947473	0.0947473		0.0947473
446	XP_011266363.1-XP_011266362.1-XP_011266361.1-E2AYQ6	0.0946049	0.0946049	0.0946049	0.0946049	0.0946049	0.0946049	0.0946049	0.0946049	0.0946049	0.0946049		0.0946049
12	XP_025263076.1	0.092301	0.092301	0.092301	0.092301	0.092301	0.092301	0.092301	0.092301	0.092301	0.092301		0.092301
149	XP_025267265.1-E1ZYQ6-E1ZYQ5	0.0918347	0.0918347	0.0918347	0.0918347	0.0918347	0.0918347	0.0918347	0.0918347	0.0918347	0.0918347		0.0918347
259	XP_011265525.1-E2AX16-E2AX15	0.0901426	0.0901426	0.0901426	0.0901426	0.0901426	0.0901426	0.0901426	0.0901426	0.0901426	0.0901426		0.0901426
152	XP_011261591.1-E2AP90	0.089235	0.089235	0.089235	0.089235	0.089235	0.089235	0.089235	0.089235	0.089235	0.089235		0.089235
300	XP_025267081.1-XP_011269145.1-XP_011268884.1-E1ZUV1	0.0890955	0.0890955	0.0890955	0.0890955	0.0890955	0.0890955	0.0890955	0.0890955	0.0890955	0.0890955		0.0890955
377	XP_011253226.1-E2A849-XP_011253225.1	0.088578	0.088578	0.088578	0.088578	0.088578	0.088578	0.088578	0.088578	0.088578	0.088578		0.088578
163	XP_011260972.1-E2AMV4	0.0882934	0.0882934	0.0882934	0.0882934	0.0882934	0.0882934	0.0882934	0.0882934	0.0882934	0.0882934		0.0882934
194	XP_011264385.1	0.087848	0.087848	0.087848	0.087848	0.087848	0.087848	0.087848	0.087848	0.087848	0.087848		0.087848
384	XP_011253906.1-E2A9D3	0.0870707	0.0870707	0.0870707	0.0870707	0.0870707	0.0870707	0.0870707	0.0870707	0.0870707	0.0870707		0.0870707
81	XP_011264690.1-XP_011264688.1-E2AVH4	0.0859907	0.0859907	0.0859907	0.0859907	0.0859907	0.0859907	0.0859907	0.0859907	0.0859907	0.0859907		0.0859907
47	XP_011260079.2-E2AL14	0.0859487	0.0859487	0.0859487	0.0859487	0.0859487	0.0859487	0.0859487	0.0859487	0.0859487	0.0859487		0.0859487
76	XP_011256104.1-E2ADN0	0.0854172	0.0854172	0.0854172	0.0854172	0.0854172	0.0854172	0.0854172	0.0854172	0.0854172	0.0854172		0.0854172
279	E2AIZ4-XP_025262148.1-XP_025262147.1-XP_025262146.1-XP_025262145.1-XP_025262144.1-XP_011258911.1-XP_011258910.1	0.0854048	0.0854048	0.0854048	0.0854048	0.0854048	0.0854048	0.0854048	0.0854048	0.0854048	0.0854048		0.0854048
254	XP_011256137.1-E1ZWP1	0.0851694	0.0851694	0.0851694	0.0851694	0.0851694	0.0851694	0.0851694	0.0851694	0.0851694	0.0851694		0.0851694
33	XP_025262946.1-XP_019882428.1-XP_019882427.1-XP_019882425.1-XP_019882423.1-XP_019882399.1-XP_019882376.1-XP_025262953.1-XP_025262951.1-XP_025262949.1-XP_025262945.1-XP_025262944.1-XP_025262943.1-XP_019882419.1-XP_019882418.1-XP_019882409.1-XP_019882401.1-XP_019882400.1-XP_019882398.1-XP_019882396.1-XP_019882393.1-XP_019882391.1-XP_019882383.1-XP_019882380.1-XP_019882377.1-XP_019882375.1-XP_025262…	0.083818	0.083818	0.083818	0.083818	0.083818	0.083818	0.083818	0.083818	0.083818	0.083818		0.083818
16	XP_025262760.1-E2ATD2	0.082412	0.082412	0.082412	0.082412	0.082412	0.082412	0.082412	0.082412	0.082412	0.082412		0.082412
72	E2AY06-XP_011266013.1	0.0798057	0.0798057	0.0798057	0.0798057	0.0798057	0.0798057	0.0798057	0.0798057	0.0798057	0.0798057		0.0798057
79	XP_011257736.2	0.0794292	0.0794292	0.0794292	0.0794292	0.0794292	0.0794292	0.0794292	0.0794292	0.0794292	0.0794292		0.0794292
330	XP_011268840.2-E2A0I9-E2A0J0	0.0787905	0.0787905	0.0787905	0.0787905	0.0787905	0.0787905	0.0787905	0.0787905	0.0787905	0.0787905		0.0787905
187	XP_011266934.1-E2AZT6	0.0777117	0.0777117	0.0777117	0.0777117	0.0777117	0.0777117	0.0777117	0.0777117	0.0777117	0.0777117		0.0777117
10	XP_025266319.1-E1ZXZ5-E2AC93	0.0769529	0.0769529	0.0769529	0.0769529	0.0769529	0.0769529	0.0769529	0.0769529	0.0769529	0.0769529		0.0769529
92	XP_019882849.1-E2AB23	0.074915	0.074915	0.074915	0.074915	0.074915	0.074915	0.074915	0.074915	0.074915	0.074915		0.074915
188	E2ABW9-XP_011255166.1	0.0737651	0.0737651	0.0737651	0.0737651	0.0737651	0.0737651	0.0737651	0.0737651	0.0737651	0.0737651		0.0737651
327	XP_011251155.1-E2A3Z5	0.0737305	0.0737305	0.0737305	0.0737305	0.0737305	0.0737305	0.0737305	0.0737305	0.0737305	0.0737305		0.0737305
111	XP_011263402.1-E1ZY32	0.0726153	0.0726153	0.0726153	0.0726153	0.0726153	0.0726153	0.0726153	0.0726153	0.0726153	0.0726153		0.0726153
220	XP_011257803.1-E2AGQ1	0.0725509	0.0725509	0.0725509	0.0725509	0.0725509	0.0725509	0.0725509	0.0725509	0.0725509	0.0725509		0.0725509
53	XP_011259391.1-XP_011259390.1-E2AJT8	0.0720194	0.0720194	0.0720194	0.0720194	0.0720194	0.0720194	0.0720194	0.0720194	0.0720194	0.0720194		0.0720194
209	XP_011263888.2-E2ATY3	0.0716867	0.0716867	0.0716867	0.0716867	0.0716867	0.0716867	0.0716867	0.0716867	0.0716867	0.0716867		0.0716867
247	E2AYS3-XP_011266404.2	0.0710557	0.0710557	0.0710557	0.0710557	0.0710557	0.0710557	0.0710557	0.0710557	0.0710557	0.0710557		0.0710557
255	XP_011251061.1-E2A3T5	0.0703655	0.0703655	0.0703655	0.0703655	0.0703655	0.0703655	0.0703655	0.0703655	0.0703655	0.0703655		0.0703655
116	E2AK03-XP_025267872.1	0.0697649	0.0697649	0.0697649	0.0697649	0.0697649	0.0697649	0.0697649	0.0697649	0.0697649	0.0697649		0.0697649
184	XP_025263927.1-XP_019885078.1-E2AZT4-XP_011266928.1	0.068722	0.068722	0.068722	0.068722	0.068722	0.068722	0.068722	0.068722	0.068722	0.068722		0.068722
302	XP_011269506.1-E2A1Q0	0.0664538	0.0664538	0.0664538	0.0664538	0.0664538	0.0664538	0.0664538	0.0664538	0.0664538	0.0664538		0.0664538
55	XP_011262697.2-E2ARG4-E2A6I8-XP_011252363.1-XP_011252362.1	0.0659855	0.0659855	0.0659855	0.0659855	0.0659855	0.0659855	0.0659855	0.0659855	0.0659855	0.0659855		0.0659855
241	E2A3I0-XP_011250877.1-XP_011250876.1-XP_011250875.1-XP_011250874.1	0.0650619	0.0650619	0.0650619	0.0650619	0.0650619	0.0650619	0.0650619	0.0650619	0.0650619	0.0650619		0.0650619
217	E2A4Q4-XP_011251564.1	0.0643	0.0643	0.0643	0.0643	0.0643	0.0643	0.0643	0.0643	0.0643	0.0643		0.0643
125	XP_011266190.1-E2AYB4	0.0635651	0.0635651	0.0635651	0.0635651	0.0635651	0.0635651	0.0635651	0.0635651	0.0635651	0.0635651		0.0635651
138	XP_025265088.1-E2AG27	0.0632464	0.0632464	0.0632464	0.0632464	0.0632464	0.0632464	0.0632464	0.0632464	0.0632464	0.0632464		0.0632464
31	XP_025265137.1-E2ABS8	0.0629692	0.0629692	0.0629692	0.0629692	0.0629692	0.0629692	0.0629692	0.0629692	0.0629692	0.0629692		0.0629692
99	XP_011253127.1-XP_011253125.1-E2A7Y1-XP_025266675.1-XP_011253124.1	0.0623319	0.0623319	0.0623319	0.0623319	0.0623319	0.0623319	0.0623319	0.0623319	0.0623319	0.0623319		0.0623319
301	E2AFY9-XP_011257447.1-XP_011257446.1-E2AFY8-XP_025268256.1-XP_025268255.1	0.0615751	0.0615751	0.0615751	0.0615751	0.0615751	0.0615751	0.0615751	0.0615751	0.0615751	0.0615751		0.0615751
69	XP_011252428.1-E2A6N1-XP_025262425.1-XP_011252154.1-XP_011252142.1-E1ZVV0-E1ZVU9-XP_025262454.1-XP_025262453.1-XP_025262452.1-XP_025262451.1	0.0615667	0.0615667	0.0615667	0.0615667	0.0615667	0.0615667	0.0615667	0.0615667	0.0615667	0.0615667		0.0615667
348	XP_025269663.1-XP_025269662.1-XP_025269661.1-XP_025269660.1-E2A1Z0-XP_025269664.1	0.061366	0.061366	0.061366	0.061366	0.061366	0.061366	0.061366	0.061366	0.061366	0.061366		0.061366
183	XP_011262417.1-E2AQX7-CON__ENSEMBL:ENSBTAP00000025008	0.0611699	0.0611699	0.0611699	0.0611699	0.0611699	0.0611699	0.0611699	0.0611699	0.0611699	0.0611699		0.0611699
201	XP_011254033.1-E2A9P2	0.0594891	0.0594891	0.0594891	0.0594891	0.0594891	0.0594891	0.0594891	0.0594891	0.0594891	0.0594891		0.0594891
135	XP_011257343.1-XP_011257342.1-E2AFQ5	0.0592925	0.0592925	0.0592925	0.0592925	0.0592925	0.0592925	0.0592925	0.0592925	0.0592925	0.0592925		0.0592925
107	XP_025262735.1-XP_025262733.1	0.0590666	0.0590666	0.0590666	0.0590666	0.0590666	0.0590666	0.0590666	0.0590666	0.0590666	0.0590666		0.0590666
82	XP_011259279.2	0.0588938	0.0588938	0.0588938	0.0588938	0.0588938	0.0588938	0.0588938	0.0588938	0.0588938	0.0588938		0.0588938
14	XP_025263077.1	0.0583261	0.0583261	0.0583261	0.0583261	0.0583261	0.0583261	0.0583261	0.0583261	0.0583261	0.0583261		0.0583261
43	XP_011252301.1-E2A6C9	0.0583113	0.0583113	0.0583113	0.0583113	0.0583113	0.0583113	0.0583113	0.0583113	0.0583113	0.0583113		0.0583113
200	XP_011253314.1-E2A8B3	0.0581886	0.0581886	0.0581886	0.0581886	0.0581886	0.0581886	0.0581886	0.0581886	0.0581886	0.0581886		0.0581886
87	XP_011258052.1-E1ZX35-E2ANB5-XP_011262825.1-E2ARN6-E2ARF2-XP_011262682.2-XP_011261161.2	0.0581754	0.0581754	0.0581754	0.0581754	0.0581754	0.0581754	0.0581754	0.0581754	0.0581754	0.0581754		0.0581754
385	XP_011264256.1-XP_011264255.1-XP_011264254.1-E2AUK6	0.058153	0.058153	0.058153	0.058153	0.058153	0.058153	0.058153	0.058153	0.058153	0.058153		0.058153
90	XP_011259751.1-E2AKD6	0.0577599	0.0577599	0.0577599	0.0577599	0.0577599	0.0577599	0.0577599	0.0577599	0.0577599	0.0577599		0.0577599
298	E2A8M5-XP_025269992.1	0.0570638	0.0570638	0.0570638	0.0570638	0.0570638	0.0570638	0.0570638	0.0570638	0.0570638	0.0570638		0.0570638
304	XP_025263723.1-XP_025263724.1-E2A460	0.0569402	0.0569402	0.0569402	0.0569402	0.0569402	0.0569402	0.0569402	0.0569402	0.0569402	0.0569402		0.0569402
44	XP_011253679.1-E2A8Y6	0.0568926	0.0568926	0.0568926	0.0568926	0.0568926	0.0568926	0.0568926	0.0568926	0.0568926	0.0568926		0.0568926
36	XP_025269126.1	0.0562144	0.0562144	0.0562144	0.0562144	0.0562144	0.0562144	0.0562144	0.0562144	0.0562144	0.0562144		0.0562144
342	XP_011264652.2-E2AVF4	0.056143	0.056143	0.056143	0.056143	0.056143	0.056143	0.056143	0.056143	0.056143	0.056143		0.056143
17	XP_011266630.1-E2AZ60	0.0554002	0.0554002	0.0554002	0.0554002	0.0554002	0.0554002	0.0554002	0.0554002	0.0554002	0.0554002		0.0554002
60	XP_019884394.1-XP_011262974.1-E2ARX6	0.0543167	0.0543167	0.0543167	0.0543167	0.0543167	0.0543167	0.0543167	0.0543167	0.0543167	0.0543167		0.0543167
186	XP_011256209.1-E2ADT4	0.0526597	0.0526597	0.0526597	0.0526597	0.0526597	0.0526597	0.0526597	0.0526597	0.0526597	0.0526597		0.0526597
19	XP_025269485.1-XP_025269481.1-E2A1Y6	0.0518148	0.0518148	0.0518148	0.0518148	0.0518148	0.0518148	0.0518148	0.0518148	0.0518148	0.0518148		0.0518148
268	E2A9Z9-XP_025264106.1-XP_011254200.2-XP_025264105.1-XP_025264104.1	0.0516043	0.0516043	0.0516043	0.0516043	0.0516043	0.0516043	0.0516043	0.0516043	0.0516043	0.0516043		0.0516043
64	XP_011255385.1-E2ACC1	0.051374	0.051374	0.051374	0.051374	0.051374	0.051374	0.051374	0.051374	0.051374	0.051374		0.051374
318	XP_011256710.2-E1ZWT9	0.0511914	0.0511914	0.0511914	0.0511914	0.0511914	0.0511914	0.0511914	0.0511914	0.0511914	0.0511914		0.0511914
143	XP_025270281.1-XP_019883853.1-XP_011260498.1-E2ALT1	0.0484312	0.0484312	0.0484312	0.0484312	0.0484312	0.0484312	0.0484312	0.0484312	0.0484312	0.0484312		0.0484312
119	XP_011266939.2-E2AZU0	0.0484029	0.0484029	0.0484029	0.0484029	0.0484029	0.0484029	0.0484029	0.0484029	0.0484029	0.0484029		0.0484029
50	XP_025265121.1-E1ZWT6	0.0472038	0.0472038	0.0472038	0.0472038	0.0472038	0.0472038	0.0472038	0.0472038	0.0472038	0.0472038		0.0472038
427	XP_025263984.1-XP_025263983.1-XP_025263982.1-XP_011252554.1-XP_011252552.1-XP_025263981.1-XP_011252551.1-XP_019882397.1-XP_011252550.1-XP_011252545.2-E2A6V3-XP_011252548.1-XP_025263980.1-XP_011252547.1	0.0471885	0.0471885	0.0471885	0.0471885	0.0471885	0.0471885	0.0471885	0.0471885	0.0471885	0.0471885		0.0471885
307	XP_025270599.1-XP_025270598.1-E1ZY72	0.0468777	0.0468777	0.0468777	0.0468777	0.0468777	0.0468777	0.0468777	0.0468777	0.0468777	0.0468777		0.0468777
235	XP_025262778.1-XP_025262777.1-XP_025262798.1-E1ZXT8	0.046628	0.046628	0.046628	0.046628	0.046628	0.046628	0.046628	0.046628	0.046628	0.046628		0.046628
1	XP_025269163.1-E2AZ61	0.0461203	0.0461203	0.0461203	0.0461203	0.0461203	0.0461203	0.0461203	0.0461203	0.0461203	0.0461203		0.0461203
345	XP_025269810.1-XP_025269809.1-XP_025269808.1-XP_025269807.1-XP_025269806.1	0.0452919	0.0452919	0.0452919	0.0452919	0.0452919	0.0452919	0.0452919	0.0452919	0.0452919	0.0452919		0.0452919
110	XP_011268846.1-XP_011265836.1-XP_011264341.1-E2A0J1	0.0448885	0.0448885	0.0448885	0.0448885	0.0448885	0.0448885	0.0448885	0.0448885	0.0448885	0.0448885		0.0448885
363	XP_011251474.1-E2A4J2	0.0444951	0.0444951	0.0444951	0.0444951	0.0444951	0.0444951	0.0444951	0.0444951	0.0444951	0.0444951		0.0444951
35	XP_011255300.1-E2AC60	0.0444645	0.0444645	0.0444645	0.0444645	0.0444645	0.0444645	0.0444645	0.0444645	0.0444645	0.0444645		0.0444645
42	XP_025264613.1	0.0440696	0.0440696	0.0440696	0.0440696	0.0440696	0.0440696	0.0440696	0.0440696	0.0440696	0.0440696		0.0440696
13	XP_025264611.1	0.0439067	0.0439067	0.0439067	0.0439067	0.0439067	0.0439067	0.0439067	0.0439067	0.0439067	0.0439067		0.0439067
204	E2A599-XP_011251836.1	0.0437306	0.0437306	0.0437306	0.0437306	0.0437306	0.0437306	0.0437306	0.0437306	0.0437306	0.0437306		0.0437306
34	XP_025269201.1-XP_025269204.1-XP_025269202.1-XP_025269214.1-XP_025269200.1-XP_025269199.1-XP_025269198.1-XP_025269197.1-XP_025269196.1-XP_025269195.1-XP_025269194.1-XP_025269193.1-XP_025269192.1-XP_025269191.1-XP_025269189.1-XP_025269188.1-XP_025269187.1-XP_025269186.1-XP_025269185.1-XP_025269184.1-XP_025269183.1-XP_025269182.1-XP_025269181.1-XP_025269180.1-XP_025269179.1-XP_025269178.1-XP_025269…	0.0433959	0.0433959	0.0433959	0.0433959	0.0433959	0.0433959	0.0433959	0.0433959	0.0433959	0.0433959		0.0433959
25	E2AC94	0.0431978	0.0431978	0.0431978	0.0431978	0.0431978	0.0431978	0.0431978	0.0431978	0.0431978	0.0431978		0.0431978
265	E2B271-XP_011268025.2	0.0425585	0.0425585	0.0425585	0.0425585	0.0425585	0.0425585	0.0425585	0.0425585	0.0425585	0.0425585		0.0425585
249	XP_011258106.1-E2AHG9-XP_011258105.1	0.042283	0.042283	0.042283	0.042283	0.042283	0.042283	0.042283	0.042283	0.042283	0.042283		0.042283
260	XP_025269241.1-E2AMU9	0.0420947	0.0420947	0.0420947	0.0420947	0.0420947	0.0420947	0.0420947	0.0420947	0.0420947	0.0420947		0.0420947
323	E1ZXZ8-XP_011262891.1	0.0420225	0.0420225	0.0420225	0.0420225	0.0420225	0.0420225	0.0420225	0.0420225	0.0420225	0.0420225		0.0420225
161	XP_011257948.1-XP_011257947.1-XP_011257946.1-XP_011257945.1-E2AH19	0.0415344	0.0415344	0.0415344	0.0415344	0.0415344	0.0415344	0.0415344	0.0415344	0.0415344	0.0415344		0.0415344
261	XP_011257674.1-E2AGG5-XP_025265771.1	0.0413944	0.0413944	0.0413944	0.0413944	0.0413944	0.0413944	0.0413944	0.0413944	0.0413944	0.0413944		0.0413944
288	XP_011258055.1-E2AHA9	0.0412485	0.0412485	0.0412485	0.0412485	0.0412485	0.0412485	0.0412485	0.0412485	0.0412485	0.0412485		0.0412485
62	XP_025269114.1-XP_025269111.1-XP_025269110.1-XP_025269109.1-XP_025269112.1-XP_025269117.1-XP_025269116.1-XP_025269113.1-XP_025269115.1-E2ARB3-E2AEH5-E2AEH6	0.0408484	0.0408484	0.0408484	0.0408484	0.0408484	0.0408484	0.0408484	0.0408484	0.0408484	0.0408484		0.0408484
329	XP_011255229.1-XP_011255228.1-E2ABZ4-E2ABZ3	0.040667	0.040667	0.040667	0.040667	0.040667	0.040667	0.040667	0.040667	0.040667	0.040667		0.040667
96	XP_025266940.1-XP_019883729.1-E2AKF6	0.0403455	0.0403455	0.0403455	0.0403455	0.0403455	0.0403455	0.0403455	0.0403455	0.0403455	0.0403455		0.0403455
320	XP_025270750.1-XP_025270749.1-XP_025270592.1-XP_025270591.1-E2AJP1-E2B077-E2AT48	0.0401288	0.0401288	0.0401288	0.0401288	0.0401288	0.0401288	0.0401288	0.0401288	0.0401288	0.0401288		0.0401288
315	E2AMK0-XP_019883943.1	0.0394432	0.0394432	0.0394432	0.0394432	0.0394432	0.0394432	0.0394432	0.0394432	0.0394432	0.0394432		0.0394432
379	XP_011265787.1-XP_011265786.1-XP_011265785.1-XP_011265784.1-XP_011265783.1-XP_011265782.1-XP_025264776.1-XP_025264775.1-XP_011265781.1-XP_011265779.1-XP_011265778.1-XP_011265776.1-E2AXI4-XP_019884889.1-XP_011265780.1	0.0388271	0.0388271	0.0388271	0.0388271	0.0388271	0.0388271	0.0388271	0.0388271	0.0388271	0.0388271		0.0388271
91	XP_011264019.1-E2AU75	0.0388199	0.0388199	0.0388199	0.0388199	0.0388199	0.0388199	0.0388199	0.0388199	0.0388199	0.0388199		0.0388199
45	E2AX77-XP_025264787.1-XP_025264786.1-XP_025264785.1-XP_025264784.1-XP_025264782.1-XP_011265555.2-XP_011265554.2-XP_011265551.2	0.0387206	0.0387206	0.0387206	0.0387206	0.0387206	0.0387206	0.0387206	0.0387206	0.0387206	0.0387206		0.0387206
70	XP_011255318.1-XP_011255317.1-E2AC71	0.0383422	0.0383422	0.0383422	0.0383422	0.0383422	0.0383422	0.0383422	0.0383422	0.0383422	0.0383422		0.0383422
157	XP_011268777.2-E2A0E4	0.0380483	0.0380483	0.0380483	0.0380483	0.0380483	0.0380483	0.0380483	0.0380483	0.0380483	0.0380483		0.0380483
24	XP_025264610.1	0.0379419	0.0379419	0.0379419	0.0379419	0.0379419	0.0379419	0.0379419	0.0379419	0.0379419	0.0379419		0.0379419
205	E2AJ75-XP_011259035.1-XP_011259034.1-XP_011259042.1	0.037336	0.037336	0.037336	0.037336	0.037336	0.037336	0.037336	0.037336	0.037336	0.037336		0.037336
137	XP_011257938.1-E2AH16	0.036878	0.036878	0.036878	0.036878	0.036878	0.036878	0.036878	0.036878	0.036878	0.036878		0.036878
197	XP_011268843.1-XP_011265835.1-XP_011264345.1-XP_011264342.1-E2AUU4-E2A0I7	0.0367125	0.0367125	0.0367125	0.0367125	0.0367125	0.0367125	0.0367125	0.0367125	0.0367125	0.0367125		0.0367125
0	XP_011252500.2-E2A6T2	0.0363282	0.0363282	0.0363282	0.0363282	0.0363282	0.0363282	0.0363282	0.0363282	0.0363282	0.0363282		0.0363282
206	E2A0I0-XP_011268828.1-XP_011268827.1	0.0359331	0.0359331	0.0359331	0.0359331	0.0359331	0.0359331	0.0359331	0.0359331	0.0359331	0.0359331		0.0359331
213	XP_025270637.1-XP_011269375.2-XP_011269374.2-E2A1F2-XP_025270580.1-E2A1F3-XP_025270579.1-XP_025270578.1	0.0357937	0.0357937	0.0357937	0.0357937	0.0357937	0.0357937	0.0357937	0.0357937	0.0357937	0.0357937		0.0357937
54	XP_019882348.2-E2A6E1	0.0353298	0.0353298	0.0353298	0.0353298	0.0353298	0.0353298	0.0353298	0.0353298	0.0353298	0.0353298		0.0353298
303	XP_025269121.1-E2A330	0.0353077	0.0353077	0.0353077	0.0353077	0.0353077	0.0353077	0.0353077	0.0353077	0.0353077	0.0353077		0.0353077
175	XP_011255562.2	0.0351688	0.0351688	0.0351688	0.0351688	0.0351688	0.0351688	0.0351688	0.0351688	0.0351688	0.0351688		0.0351688
404	XP_011258665.1-E1ZX82-XP_011265369.1-E2AWS1	0.0350346	0.0350346	0.0350346	0.0350346	0.0350346	0.0350346	0.0350346	0.0350346	0.0350346	0.0350346		0.0350346
117	E1ZV54-XP_011267596.1	0.0348984	0.0348984	0.0348984	0.0348984	0.0348984	0.0348984	0.0348984	0.0348984	0.0348984	0.0348984		0.0348984
15	XP_011266010.1-E2AY02	0.0344212	0.0344212	0.0344212	0.0344212	0.0344212	0.0344212	0.0344212	0.0344212	0.0344212	0.0344212		0.0344212
66	E2AU22-XP_019884578.2	0.0341731	0.0341731	0.0341731	0.0341731	0.0341731	0.0341731	0.0341731	0.0341731	0.0341731	0.0341731		0.0341731
156	XP_019883183.1-E2AEN9-XP_011256790.1	0.0340041	0.0340041	0.0340041	0.0340041	0.0340041	0.0340041	0.0340041	0.0340041	0.0340041	0.0340041		0.0340041
73	E2ARJ0-XP_011262743.2	0.0339288	0.0339288	0.0339288	0.0339288	0.0339288	0.0339288	0.0339288	0.0339288	0.0339288	0.0339288		0.0339288
306	XP_011253234.2-XP_011253233.2-XP_011253232.2-E2A880-XP_011253230.2-XP_011253229.2-XP_025265359.1-XP_011253238.1-XP_011253235.2-XP_011253236.1	0.0335163	0.0335163	0.0335163	0.0335163	0.0335163	0.0335163	0.0335163	0.0335163	0.0335163	0.0335163		0.0335163
51	XP_011269703.1-XP_011269702.1-E2A252-XP_011257369.1-XP_011257368.1-XP_011257367.1-E2AFT7	0.0332058	0.0332058	0.0332058	0.0332058	0.0332058	0.0332058	0.0332058	0.0332058	0.0332058	0.0332058		0.0332058
232	E2AME3-XP_011260769.1	0.0329447	0.0329447	0.0329447	0.0329447	0.0329447	0.0329447	0.0329447	0.0329447	0.0329447	0.0329447		0.0329447
26	XP_011252309.2-E2A6E2	0.0323137	0.0323137	0.0323137	0.0323137	0.0323137	0.0323137	0.0323137	0.0323137	0.0323137	0.0323137		0.0323137
314	XP_011254474.1-E2AAH6	0.0322995	0.0322995	0.0322995	0.0322995	0.0322995	0.0322995	0.0322995	0.0322995	0.0322995	0.0322995		0.0322995
106	XP_011258566.1-XP_011258565.1-E2AIC5	0.0321694	0.0321694	0.0321694	0.0321694	0.0321694	0.0321694	0.0321694	0.0321694	0.0321694	0.0321694		0.0321694
172	XP_025268258.1	0.0321635	0.0321635	0.0321635	0.0321635	0.0321635	0.0321635	0.0321635	0.0321635	0.0321635	0.0321635		0.0321635
267	XP_011264946.1-E2AVX1	0.0319716	0.0319716	0.0319716	0.0319716	0.0319716	0.0319716	0.0319716	0.0319716	0.0319716	0.0319716		0.0319716
57	E2AX18-XP_011265519.1-XP_011265517.1	0.0316251	0.0316251	0.0316251	0.0316251	0.0316251	0.0316251	0.0316251	0.0316251	0.0316251	0.0316251		0.0316251
108	XP_011252356.1-E2A6I4	0.0308838	0.0308838	0.0308838	0.0308838	0.0308838	0.0308838	0.0308838	0.0308838	0.0308838	0.0308838		0.0308838
400	XP_011256502.1-E2AEA4	0.0304556	0.0304556	0.0304556	0.0304556	0.0304556	0.0304556	0.0304556	0.0304556	0.0304556	0.0304556		0.0304556
234	XP_011263372.1-XP_011263370.1-E2ASS1	0.0304298	0.0304298	0.0304298	0.0304298	0.0304298	0.0304298	0.0304298	0.0304298	0.0304298	0.0304298		0.0304298
6	XP_011257802.2-XP_011257800.2	0.0303684	0.0303684	0.0303684	0.0303684	0.0303684	0.0303684	0.0303684	0.0303684	0.0303684	0.0303684		0.0303684
74	XP_011264892.1-XP_011264890.1-E2AVV1	0.0298492	0.0298492	0.0298492	0.0298492	0.0298492	0.0298492	0.0298492	0.0298492	0.0298492	0.0298492		0.0298492
167	XP_011267621.1-E2B1B7	0.0295947	0.0295947	0.0295947	0.0295947	0.0295947	0.0295947	0.0295947	0.0295947	0.0295947	0.0295947		0.0295947
139	E2ABN0-XP_011255042.2-XP_011255044.1-XP_011255043.1	0.0293854	0.0293854	0.0293854	0.0293854	0.0293854	0.0293854	0.0293854	0.0293854	0.0293854	0.0293854		0.0293854
328	XP_025271421.1-E2APS1	0.0293794	0.0293794	0.0293794	0.0293794	0.0293794	0.0293794	0.0293794	0.0293794	0.0293794	0.0293794		0.0293794
277	XP_011253192.1-E2A7Z9	0.0291386	0.0291386	0.0291386	0.0291386	0.0291386	0.0291386	0.0291386	0.0291386	0.0291386	0.0291386		0.0291386
80	E2B227-XP_011267964.1	0.0288176	0.0288176	0.0288176	0.0288176	0.0288176	0.0288176	0.0288176	0.0288176	0.0288176	0.0288176		0.0288176
102	XP_011269567.2-E2A1T1	0.0286215	0.0286215	0.0286215	0.0286215	0.0286215	0.0286215	0.0286215	0.0286215	0.0286215	0.0286215		0.0286215
146	XP_019884788.1-XP_019884801.1-XP_019884800.1-XP_019884798.1-XP_011265227.1-XP_019884796.1-XP_019884794.1-XP_019884790.1-XP_019884789.1-XP_019884786.1-XP_019884785.1-XP_025267686.1-XP_019884802.1-XP_025267684.1-XP_019884792.1-XP_019884791.1-XP_019884787.1-XP_019884803.1-XP_025267682.1-XP_019884793.1-XP_025267685.1	0.0284195	0.0284195	0.0284195	0.0284195	0.0284195	0.0284195	0.0284195	0.0284195	0.0284195	0.0284195		0.0284195
134	XP_011266818.1-E2AZK6-XP_011266817.1	0.0282381	0.0282381	0.0282381	0.0282381	0.0282381	0.0282381	0.0282381	0.0282381	0.0282381	0.0282381		0.0282381
105	XP_011256347.1-XP_011256346.1-E2ADZ5	0.0281499	0.0281499	0.0281499	0.0281499	0.0281499	0.0281499	0.0281499	0.0281499	0.0281499	0.0281499		0.0281499
396	XP_011265379.1-E2AWT0	0.0276195	0.0276195	0.0276195	0.0276195	0.0276195	0.0276195	0.0276195	0.0276195	0.0276195	0.0276195		0.0276195
210	XP_011266529.1-E2AZ08	0.0275508	0.0275508	0.0275508	0.0275508	0.0275508	0.0275508	0.0275508	0.0275508	0.0275508	0.0275508		0.0275508
408	XP_025269798.1	0.0275178	0.0275178	0.0275178	0.0275178	0.0275178	0.0275178	0.0275178	0.0275178	0.0275178	0.0275178		0.0275178
130	XP_011263352.1-E2ASQ5	0.0274915	0.0274915	0.0274915	0.0274915	0.0274915	0.0274915	0.0274915	0.0274915	0.0274915	0.0274915		0.0274915
85	XP_025265943.1-E2AGD3	0.0272254	0.0272254	0.0272254	0.0272254	0.0272254	0.0272254	0.0272254	0.0272254	0.0272254	0.0272254		0.0272254
71	XP_011254210.2-XP_011254209.2-E2AA04	0.027153	0.027153	0.027153	0.027153	0.027153	0.027153	0.027153	0.027153	0.027153	0.027153		0.027153
287	XP_011267373.1-XP_011267372.1-XP_011267371.1-XP_011267370.1-E2B0R2	0.0271163	0.0271163	0.0271163	0.0271163	0.0271163	0.0271163	0.0271163	0.0271163	0.0271163	0.0271163		0.0271163
3	XP_011259281.2	0.0270731	0.0270731	0.0270731	0.0270731	0.0270731	0.0270731	0.0270731	0.0270731	0.0270731	0.0270731		0.0270731
236	XP_011255915.1-XP_011255908.1-XP_011255898.1-XP_011255881.1-E1ZWM5	0.0269332	0.0269332	0.0269332	0.0269332	0.0269332	0.0269332	0.0269332	0.0269332	0.0269332	0.0269332		0.0269332
325	XP_025266889.1-E2A031	0.026897	0.026897	0.026897	0.026897	0.026897	0.026897	0.026897	0.026897	0.026897	0.026897		0.026897
272	XP_025268772.1-E2A225	0.0267725	0.0267725	0.0267725	0.0267725	0.0267725	0.0267725	0.0267725	0.0267725	0.0267725	0.0267725		0.0267725
153	XP_019885340.1-E1ZZ64-E1ZZ62	0.0267386	0.0267386	0.0267386	0.0267386	0.0267386	0.0267386	0.0267386	0.0267386	0.0267386	0.0267386		0.0267386
126	XP_025270284.1-XP_025270283.1-E2ALT3	0.0262693	0.0262693	0.0262693	0.0262693	0.0262693	0.0262693	0.0262693	0.0262693	0.0262693	0.0262693		0.0262693
120	XP_011255639.1-E2ACR2	0.0259049	0.0259049	0.0259049	0.0259049	0.0259049	0.0259049	0.0259049	0.0259049	0.0259049	0.0259049		0.0259049
77	XP_025270286.1-E1ZYU0-XP_011261436.3	0.0258531	0.0258531	0.0258531	0.0258531	0.0258531	0.0258531	0.0258531	0.0258531	0.0258531	0.0258531		0.0258531
193	XP_011261506.1-E2AP55	0.0257947	0.0257947	0.0257947	0.0257947	0.0257947	0.0257947	0.0257947	0.0257947	0.0257947	0.0257947		0.0257947
67	E2ALP2-XP_011260424.1	0.0257752	0.0257752	0.0257752	0.0257752	0.0257752	0.0257752	0.0257752	0.0257752	0.0257752	0.0257752		0.0257752
334	XP_011261977.1-E2APZ9	0.0255739	0.0255739	0.0255739	0.0255739	0.0255739	0.0255739	0.0255739	0.0255739	0.0255739	0.0255739		0.0255739
423	E2AKU3-XP_011259976.1	0.0252556	0.0252556	0.0252556	0.0252556	0.0252556	0.0252556	0.0252556	0.0252556	0.0252556	0.0252556		0.0252556
68	XP_011268594.2	0.0252328	0.0252328	0.0252328	0.0252328	0.0252328	0.0252328	0.0252328	0.0252328	0.0252328	0.0252328		0.0252328
173	XP_019882645.2-E2A931	0.025226	0.025226	0.025226	0.025226	0.025226	0.025226	0.025226	0.025226	0.025226	0.025226		0.025226
21	XP_019882311.2-E2A631	0.0251632	0.0251632	0.0251632	0.0251632	0.0251632	0.0251632	0.0251632	0.0251632	0.0251632	0.0251632		0.0251632
223	XP_011258099.1-E2AHG1	0.0251122	0.0251122	0.0251122	0.0251122	0.0251122	0.0251122	0.0251122	0.0251122	0.0251122	0.0251122		0.0251122
170	XP_011255648.1-E2ACR5	0.0251016	0.0251016	0.0251016	0.0251016	0.0251016	0.0251016	0.0251016	0.0251016	0.0251016	0.0251016		0.0251016
358	XP_011251028.1-E2A3R3	0.0250222	0.0250222	0.0250222	0.0250222	0.0250222	0.0250222	0.0250222	0.0250222	0.0250222	0.0250222		0.0250222
52	XP_019884091.1-E1ZXR7	0.0250145	0.0250145	0.0250145	0.0250145	0.0250145	0.0250145	0.0250145	0.0250145	0.0250145	0.0250145		0.0250145
83	XP_025265223.1-XP_025265222.1-XP_025265221.1	0.0249212	0.0249212	0.0249212	0.0249212	0.0249212	0.0249212	0.0249212	0.0249212	0.0249212	0.0249212		0.0249212
145	E2B123-XP_025270483.1-XP_011267482.1	0.0246998	0.0246998	0.0246998	0.0246998	0.0246998	0.0246998	0.0246998	0.0246998	0.0246998	0.0246998		0.0246998
226	XP_011251854.1-E2A5C4	0.0245233	0.0245233	0.0245233	0.0245233	0.0245233	0.0245233	0.0245233	0.0245233	0.0245233	0.0245233		0.0245233
280	XP_011266663.1-E2AZ96	0.0243969	0.0243969	0.0243969	0.0243969	0.0243969	0.0243969	0.0243969	0.0243969	0.0243969	0.0243969		0.0243969
190	E2AXM8-XP_011265872.1	0.0242721	0.0242721	0.0242721	0.0242721	0.0242721	0.0242721	0.0242721	0.0242721	0.0242721	0.0242721		0.0242721
305	E2AVY8-XP_011264984.2	0.0235118	0.0235118	0.0235118	0.0235118	0.0235118	0.0235118	0.0235118	0.0235118	0.0235118	0.0235118		0.0235118
244	XP_011250985.1-XP_011250984.1-E2A3N8	0.0234183	0.0234183	0.0234183	0.0234183	0.0234183	0.0234183	0.0234183	0.0234183	0.0234183	0.0234183		0.0234183
5	XP_011255282.1-E2AC27	0.0231632	0.0231632	0.0231632	0.0231632	0.0231632	0.0231632	0.0231632	0.0231632	0.0231632	0.0231632		0.0231632
98	XP_011260780.1-E1ZXJ7	0.0230451	0.0230451	0.0230451	0.0230451	0.0230451	0.0230451	0.0230451	0.0230451	0.0230451	0.0230451		0.0230451
148	XP_011250693.1-E2A358	0.0227507	0.0227507	0.0227507	0.0227507	0.0227507	0.0227507	0.0227507	0.0227507	0.0227507	0.0227507		0.0227507
346	E2ABB7-XP_025262434.1-XP_025262433.1-E2AAW0-XP_011254668.2-XP_025263358.1-XP_025263357.1-XP_011260570.1-XP_025263356.1-XP_011260569.1-XP_011260568.1-E2ALY5-XP_011260567.1	0.0225945	0.0225945	0.0225945	0.0225945	0.0225945	0.0225945	0.0225945	0.0225945	0.0225945	0.0225945		0.0225945
9	E2AZ59-XP_011266628.1	0.0224574	0.0224574	0.0224574	0.0224574	0.0224574	0.0224574	0.0224574	0.0224574	0.0224574	0.0224574		0.0224574
245	XP_011268722.1-XP_025270978.1-XP_025270976.1-E2A0C4-XP_025270977.1	0.0221504	0.0221504	0.0221504	0.0221504	0.0221504	0.0221504	0.0221504	0.0221504	0.0221504	0.0221504		0.0221504
154	XP_011265213.1-E2AWC1	0.0221216	0.0221216	0.0221216	0.0221216	0.0221216	0.0221216	0.0221216	0.0221216	0.0221216	0.0221216		0.0221216
140	XP_011267179.1-E2B0D3	0.0218941	0.0218941	0.0218941	0.0218941	0.0218941	0.0218941	0.0218941	0.0218941	0.0218941	0.0218941		0.0218941
48	XP_011255281.1-E2AC28-E2AC29	0.0216178	0.0216178	0.0216178	0.0216178	0.0216178	0.0216178	0.0216178	0.0216178	0.0216178	0.0216178		0.0216178
122	E2A5R3-XP_011252033.1-XP_011252032.1-XP_011252034.1-XP_011252062.1	0.0212357	0.0212357	0.0212357	0.0212357	0.0212357	0.0212357	0.0212357	0.0212357	0.0212357	0.0212357		0.0212357
285	E2ALU3-XP_019883849.2	0.0212225	0.0212225	0.0212225	0.0212225	0.0212225	0.0212225	0.0212225	0.0212225	0.0212225	0.0212225		0.0212225
274	XP_011268460.1-E1ZZT5	0.0210752	0.0210752	0.0210752	0.0210752	0.0210752	0.0210752	0.0210752	0.0210752	0.0210752	0.0210752		0.0210752
413	XP_025268334.1-XP_011256430.2-E2AE31	0.0209207	0.0209207	0.0209207	0.0209207	0.0209207	0.0209207	0.0209207	0.0209207	0.0209207	0.0209207		0.0209207
367	XP_011254716.1-E2AB03	0.020756	0.020756	0.020756	0.020756	0.020756	0.020756	0.020756	0.020756	0.020756	0.020756		0.020756
211	XP_025262495.1	0.0204241	0.0204241	0.0204241	0.0204241	0.0204241	0.0204241	0.0204241	0.0204241	0.0204241	0.0204241		0.0204241
218	XP_011254740.1-E2AB19	0.0203578	0.0203578	0.0203578	0.0203578	0.0203578	0.0203578	0.0203578	0.0203578	0.0203578	0.0203578		0.0203578
169	E2A6W8-XP_011252591.1	0.0203246	0.0203246	0.0203246	0.0203246	0.0203246	0.0203246	0.0203246	0.0203246	0.0203246	0.0203246		0.0203246
258	XP_025265926.1-XP_025265925.1-E2B1D6	0.0202647	0.0202647	0.0202647	0.0202647	0.0202647	0.0202647	0.0202647	0.0202647	0.0202647	0.0202647		0.0202647
295	XP_025269642.1-E2AY85	0.020158	0.020158	0.020158	0.020158	0.020158	0.020158	0.020158	0.020158	0.020158	0.020158		0.020158
297	E2ARB2-XP_011262616.1-XP_011262620.1-XP_019884311.1-XP_019884310.1-XP_019884308.1-XP_019884307.1-XP_019884306.1-XP_011262619.1	0.0200884	0.0200884	0.0200884	0.0200884	0.0200884	0.0200884	0.0200884	0.0200884	0.0200884	0.0200884		0.0200884
486	E2AJY8-XP_011259491.1-XP_011259490.1-XP_011259489.1-XP_019883681.2	0.0199904	0.0199904	0.0199904	0.0199904	0.0199904	0.0199904	0.0199904	0.0199904	0.0199904	0.0199904		0.0199904
229	XP_025264147.1	0.0199461	0.0199461	0.0199461	0.0199461	0.0199461	0.0199461	0.0199461	0.0199461	0.0199461	0.0199461		0.0199461
29	XP_011253495.1-E2A8P0	0.0197409	0.0197409	0.0197409	0.0197409	0.0197409	0.0197409	0.0197409	0.0197409	0.0197409	0.0197409		0.0197409
282	XP_011253055.2-E2A7S3	0.0196878	0.0196878	0.0196878	0.0196878	0.0196878	0.0196878	0.0196878	0.0196878	0.0196878	0.0196878		0.0196878
181	XP_011260992.1-E2AMW3	0.0190634	0.0190634	0.0190634	0.0190634	0.0190634	0.0190634	0.0190634	0.0190634	0.0190634	0.0190634		0.0190634
207	E1ZWP8	0.0188851	0.0188851	0.0188851	0.0188851	0.0188851	0.0188851	0.0188851	0.0188851	0.0188851	0.0188851		0.0188851
309	E2ANE4-XP_011261213.1	0.0188746	0.0188746	0.0188746	0.0188746	0.0188746	0.0188746	0.0188746	0.0188746	0.0188746	0.0188746		0.0188746
100	E2AK04-XP_011259541.1	0.0188622	0.0188622	0.0188622	0.0188622	0.0188622	0.0188622	0.0188622	0.0188622	0.0188622	0.0188622		0.0188622
230	E2AE72	0.0188086	0.0188086	0.0188086	0.0188086	0.0188086	0.0188086	0.0188086	0.0188086	0.0188086	0.0188086		0.0188086
75	XP_011267122.2-XP_011267116.2-XP_011267109.2-XP_011267102.2-XP_011267093.2-XP_011267131.3-E1ZYU8	0.0183647	0.0183647	0.0183647	0.0183647	0.0183647	0.0183647	0.0183647	0.0183647	0.0183647	0.0183647		0.0183647
356	XP_011267566.2-E2B178	0.0182441	0.0182441	0.0182441	0.0182441	0.0182441	0.0182441	0.0182441	0.0182441	0.0182441	0.0182441		0.0182441
433	XP_011255213.1-XP_011255212.1-XP_025267753.1-E2ABZ0	0.0181169	0.0181169	0.0181169	0.0181169	0.0181169	0.0181169	0.0181169	0.0181169	0.0181169	0.0181169		0.0181169
93	XP_011254034.1-E2A9P3	0.0177632	0.0177632	0.0177632	0.0177632	0.0177632	0.0177632	0.0177632	0.0177632	0.0177632	0.0177632		0.0177632
171	XP_011268592.1-XP_011268591.1-E1ZZY1	0.0176672	0.0176672	0.0176672	0.0176672	0.0176672	0.0176672	0.0176672	0.0176672	0.0176672	0.0176672		0.0176672
251	XP_011256281.2-E2ADW9-E2ADX0-XP_025262684.1-XP_025262685.1-XP_025262693.1-E2ADW3	0.01766	0.01766	0.01766	0.01766	0.01766	0.01766	0.01766	0.01766	0.01766	0.01766		0.01766
270	XP_019883361.1-XP_019883360.1-E2AGJ7-XP_011257718.1	0.0174175	0.0174175	0.0174175	0.0174175	0.0174175	0.0174175	0.0174175	0.0174175	0.0174175	0.0174175		0.0174175
461	XP_011259329.1-E2AJQ0	0.0173485	0.0173485	0.0173485	0.0173485	0.0173485	0.0173485	0.0173485	0.0173485	0.0173485	0.0173485		0.0173485
326	XP_011267679.1-E2B1G2-XP_011267678.1	0.0173083	0.0173083	0.0173083	0.0173083	0.0173083	0.0173083	0.0173083	0.0173083	0.0173083	0.0173083		0.0173083
332	XP_011260293.1-E2ALF0	0.01707	0.01707	0.01707	0.01707	0.01707	0.01707	0.01707	0.01707	0.01707	0.01707		0.01707
459	E2ACU8-XP_011255731.1-XP_011255730.1-XP_011255729.1-XP_011255728.1-XP_011255727.1-XP_011255725.1-XP_019882977.1	0.0168882	0.0168882	0.0168882	0.0168882	0.0168882	0.0168882	0.0168882	0.0168882	0.0168882	0.0168882		0.0168882
198	XP_011268873.1-XP_011268841.1-XP_011264343.1-XP_011264339.1-E2AUU5-E2AUU1-E2A0I8-XP_011252166.1-E2A633-E2AGF1-XP_011257651.1-XP_011257652.1	0.0168726	0.0168726	0.0168726	0.0168726	0.0168726	0.0168726	0.0168726	0.0168726	0.0168726	0.0168726		0.0168726
225	XP_019883321.1-E2AG54	0.0164513	0.0164513	0.0164513	0.0164513	0.0164513	0.0164513	0.0164513	0.0164513	0.0164513	0.0164513		0.0164513
133	E2A4U9-XP_019882208.1-XP_011251636.1-XP_011251639.2	0.0164345	0.0164345	0.0164345	0.0164345	0.0164345	0.0164345	0.0164345	0.0164345	0.0164345	0.0164345		0.0164345
278	XP_011251352.1-E2A481	0.0162867	0.0162867	0.0162867	0.0162867	0.0162867	0.0162867	0.0162867	0.0162867	0.0162867	0.0162867		0.0162867
392	XP_011261604.1-XP_011261603.1-XP_011261602.1-XP_011261601.1-XP_019884096.1-E2AP98	0.0162245	0.0162245	0.0162245	0.0162245	0.0162245	0.0162245	0.0162245	0.0162245	0.0162245	0.0162245		0.0162245
94	E2A4H5-XP_011251451.1	0.015976	0.015976	0.015976	0.015976	0.015976	0.015976	0.015976	0.015976	0.015976	0.015976		0.015976
317	XP_011263650.1-E2ATD7	0.0157837	0.0157837	0.0157837	0.0157837	0.0157837	0.0157837	0.0157837	0.0157837	0.0157837	0.0157837		0.0157837
101	XP_011254133.1-E2A9W2	0.0157656	0.0157656	0.0157656	0.0157656	0.0157656	0.0157656	0.0157656	0.0157656	0.0157656	0.0157656		0.0157656
46	E2ARH9-XP_011262712.1	0.0156884	0.0156884	0.0156884	0.0156884	0.0156884	0.0156884	0.0156884	0.0156884	0.0156884	0.0156884		0.0156884
343	XP_025266115.1-XP_025266112.1-XP_011258258.1-XP_011258256.1-XP_025266109.1-XP_011258255.1-E2AHP8	0.0156154	0.0156154	0.0156154	0.0156154	0.0156154	0.0156154	0.0156154	0.0156154	0.0156154	0.0156154		0.0156154
18	XP_025264718.1	0.0155954	0.0155954	0.0155954	0.0155954	0.0155954	0.0155954	0.0155954	0.0155954	0.0155954	0.0155954		0.0155954
158	XP_025269062.1-E2AGL2	0.0155074	0.0155074	0.0155074	0.0155074	0.0155074	0.0155074	0.0155074	0.0155074	0.0155074	0.0155074		0.0155074
49	XP_011251688.1-E2A4X8	0.0154458	0.0154458	0.0154458	0.0154458	0.0154458	0.0154458	0.0154458	0.0154458	0.0154458	0.0154458		0.0154458
61	XP_025263365.1	0.0151071	0.0151071	0.0151071	0.0151071	0.0151071	0.0151071	0.0151071	0.0151071	0.0151071	0.0151071		0.0151071
375	XP_011256472.1-XP_011256471.1-E2AE47	0.0150383	0.0150383	0.0150383	0.0150383	0.0150383	0.0150383	0.0150383	0.0150383	0.0150383	0.0150383		0.0150383
386	XP_011267731.1-XP_011267723.1-E1ZYZ4	0.0147621	0.0147621	0.0147621	0.0147621	0.0147621	0.0147621	0.0147621	0.0147621	0.0147621	0.0147621		0.0147621
443	XP_011253629.1-E2A8V7	0.014649	0.014649	0.014649	0.014649	0.014649	0.014649	0.014649	0.014649	0.014649	0.014649		0.014649
8	E2AIX5-XP_025263124.1	0.0145686	0.0145686	0.0145686	0.0145686	0.0145686	0.0145686	0.0145686	0.0145686	0.0145686	0.0145686		0.0145686
331	XP_011269026.3-E2A0U6	0.0145563	0.0145563	0.0145563	0.0145563	0.0145563	0.0145563	0.0145563	0.0145563	0.0145563	0.0145563		0.0145563
4	XP_011266069.1-E2AY28	0.014519	0.014519	0.014519	0.014519	0.014519	0.014519	0.014519	0.014519	0.014519	0.014519		0.014519
151	XP_011268273.1-E1ZZF6	0.014452	0.014452	0.014452	0.014452	0.014452	0.014452	0.014452	0.014452	0.014452	0.014452		0.014452
155	E2A4N5-XP_011251529.2	0.0143843	0.0143843	0.0143843	0.0143843	0.0143843	0.0143843	0.0143843	0.0143843	0.0143843	0.0143843		0.0143843
216	XP_011256323.1-XP_011256322.1-XP_011256321.1-E2ADY7-E2ADY5	0.0142613	0.0142613	0.0142613	0.0142613	0.0142613	0.0142613	0.0142613	0.0142613	0.0142613	0.0142613		0.0142613
419	E1ZVB4-XP_011268973.1	0.0142568	0.0142568	0.0142568	0.0142568	0.0142568	0.0142568	0.0142568	0.0142568	0.0142568	0.0142568		0.0142568
453	XP_011269716.3-E2A226	0.0142143	0.0142143	0.0142143	0.0142143	0.0142143	0.0142143	0.0142143	0.0142143	0.0142143	0.0142143		0.0142143
38	E2AJL8	0.0140373	0.0140373	0.0140373	0.0140373	0.0140373	0.0140373	0.0140373	0.0140373	0.0140373	0.0140373		0.0140373
231	XP_025270291.1-E2AAT8	0.0139112	0.0139112	0.0139112	0.0139112	0.0139112	0.0139112	0.0139112	0.0139112	0.0139112	0.0139112		0.0139112
22	XP_025269812.1	0.0138346	0.0138346	0.0138346	0.0138346	0.0138346	0.0138346	0.0138346	0.0138346	0.0138346	0.0138346		0.0138346
224	XP_011260853.1-E2AMK4	0.0137201	0.0137201	0.0137201	0.0137201	0.0137201	0.0137201	0.0137201	0.0137201	0.0137201	0.0137201		0.0137201
27	XP_025269479.1-E2AJL7	0.01367	0.01367	0.01367	0.01367	0.01367	0.01367	0.01367	0.01367	0.01367	0.01367		0.01367
290	E1ZVC0-XP_011269033.1	0.0136657	0.0136657	0.0136657	0.0136657	0.0136657	0.0136657	0.0136657	0.0136657	0.0136657	0.0136657		0.0136657
403	XP_011255476.1-XP_011255475.1-XP_011255474.1-E2ACH8	0.0136456	0.0136456	0.0136456	0.0136456	0.0136456	0.0136456	0.0136456	0.0136456	0.0136456	0.0136456		0.0136456
65	XP_011258918.1-E2AIZ6	0.0133543	0.0133543	0.0133543	0.0133543	0.0133543	0.0133543	0.0133543	0.0133543	0.0133543	0.0133543		0.0133543
373	XP_011253770.2-E2A938	0.0132959	0.0132959	0.0132959	0.0132959	0.0132959	0.0132959	0.0132959	0.0132959	0.0132959	0.0132959		0.0132959
406	XP_011258211.1-E2AHR4	0.0132753	0.0132753	0.0132753	0.0132753	0.0132753	0.0132753	0.0132753	0.0132753	0.0132753	0.0132753		0.0132753
275	E2B223-XP_011267952.3	0.0132042	0.0132042	0.0132042	0.0132042	0.0132042	0.0132042	0.0132042	0.0132042	0.0132042	0.0132042		0.0132042
296	XP_011250832.1-E2A3G1	0.0131811	0.0131811	0.0131811	0.0131811	0.0131811	0.0131811	0.0131811	0.0131811	0.0131811	0.0131811		0.0131811
37	XP_011267011.2	0.0130519	0.0130519	0.0130519	0.0130519	0.0130519	0.0130519	0.0130519	0.0130519	0.0130519	0.0130519		0.0130519
347	XP_011266221.1-E2AYF4-XP_011266222.1	0.0130068	0.0130068	0.0130068	0.0130068	0.0130068	0.0130068	0.0130068	0.0130068	0.0130068	0.0130068		0.0130068
131	E2A543-XP_025262620.1	0.0129233	0.0129233	0.0129233	0.0129233	0.0129233	0.0129233	0.0129233	0.0129233	0.0129233	0.0129233		0.0129233
455	XP_011255231.1-E2ABZ6	0.0129038	0.0129038	0.0129038	0.0129038	0.0129038	0.0129038	0.0129038	0.0129038	0.0129038	0.0129038		0.0129038
227	XP_011254980.1-XP_011254979.1-E2ABH4-XP_011254978.1-XP_011254977.1	0.012704	0.012704	0.012704	0.012704	0.012704	0.012704	0.012704	0.012704	0.012704	0.012704		0.012704
56	XP_019884420.2	0.012428	0.012428	0.012428	0.012428	0.012428	0.012428	0.012428	0.012428	0.012428	0.012428		0.012428
174	E1ZYQ1-XP_025267158.1-XP_011266637.1-XP_011266629.1-XP_011266622.1	0.0122996	0.0122996	0.0122996	0.0122996	0.0122996	0.0122996	0.0122996	0.0122996	0.0122996	0.0122996		0.0122996
354	E2AYI3-XP_025268444.1-XP_025268446.1-XP_025268445.1	0.0120645	0.0120645	0.0120645	0.0120645	0.0120645	0.0120645	0.0120645	0.0120645	0.0120645	0.0120645		0.0120645
357	XP_025268915.1-XP_011252288.1-XP_011252287.1-E2A6B9	0.0113848	0.0113848	0.0113848	0.0113848	0.0113848	0.0113848	0.0113848	0.0113848	0.0113848	0.0113848		0.0113848
395	XP_011252466.1-E2A6R7-XP_011252465.1	0.0113588	0.0113588	0.0113588	0.0113588	0.0113588	0.0113588	0.0113588	0.0113588	0.0113588	0.0113588		0.0113588
266	XP_011254456.1-XP_011254455.1-E2AAG3	0.0113361	0.0113361	0.0113361	0.0113361	0.0113361	0.0113361	0.0113361	0.0113361	0.0113361	0.0113361		0.0113361
269	XP_011252045.1-E2A5M2	0.0110585	0.0110585	0.0110585	0.0110585	0.0110585	0.0110585	0.0110585	0.0110585	0.0110585	0.0110585		0.0110585
276	E1ZWT5	0.0109782	0.0109782	0.0109782	0.0109782	0.0109782	0.0109782	0.0109782	0.0109782	0.0109782	0.0109782		0.0109782
185	XP_011261154.1-XP_025264083.1-XP_025264079.1-XP_011261152.1-XP_025264076.1-E2ANA9	0.0108654	0.0108654	0.0108654	0.0108654	0.0108654	0.0108654	0.0108654	0.0108654	0.0108654	0.0108654		0.0108654
308	XP_025270282.1-XP_011260493.3	0.0107191	0.0107191	0.0107191	0.0107191	0.0107191	0.0107191	0.0107191	0.0107191	0.0107191	0.0107191		0.0107191
124	XP_025262039.1-XP_025262034.1-XP_025262032.1-XP_025262029.1-E2A1S2-E2AVK5	0.0106035	0.0106035	0.0106035	0.0106035	0.0106035	0.0106035	0.0106035	0.0106035	0.0106035	0.0106035		0.0106035
337	XP_011259637.1-E2AK65	0.0104739	0.0104739	0.0104739	0.0104739	0.0104739	0.0104739	0.0104739	0.0104739	0.0104739	0.0104739		0.0104739
350	XP_011263339.1-E2ASN8	0.0101863	0.0101863	0.0101863	0.0101863	0.0101863	0.0101863	0.0101863	0.0101863	0.0101863	0.0101863		0.0101863
202	XP_011253554.1-E2A8R8-XP_011253553.1-XP_011253552.1	0.00999485	0.00999485	0.00999485	0.00999485	0.00999485	0.00999485	0.00999485	0.00999485	0.00999485	0.00999485		0.00999485
11	XP_025263304.1-XP_011263078.2	0.00993168	0.00993168	0.00993168	0.00993168	0.00993168	0.00993168	0.00993168	0.00993168	0.00993168	0.00993168		0.00993168
353	XP_011253726.1-XP_011253725.1-XP_011253724.1-XP_011253723.1-E2A915	0.0099277	0.0099277	0.0099277	0.0099277	0.0099277	0.0099277	0.0099277	0.0099277	0.0099277	0.0099277		0.0099277
283	XP_011268669.1-E2A057	0.00983598	0.00983598	0.00983598	0.00983598	0.00983598	0.00983598	0.00983598	0.00983598	0.00983598	0.00983598		0.00983598
243	E2B1C8-XP_011267643.2	0.00978971	0.00978971	0.00978971	0.00978971	0.00978971	0.00978971	0.00978971	0.00978971	0.00978971	0.00978971		0.00978971
424	XP_011253799.1-XP_011253800.1-XP_011253798.1-XP_011253797.1-XP_011253796.1-E2A949	0.0096229	0.0096229	0.0096229	0.0096229	0.0096229	0.0096229	0.0096229	0.0096229	0.0096229	0.0096229		0.0096229
273	XP_011263226.1-E2ASG6	0.00943092	0.00943092	0.00943092	0.00943092	0.00943092	0.00943092	0.00943092	0.00943092	0.00943092	0.00943092		0.00943092
366	XP_025266972.1-XP_011259813.1-E2AKG6	0.00926275	0.00926275	0.00926275	0.00926275	0.00926275	0.00926275	0.00926275	0.00926275	0.00926275	0.00926275		0.00926275
208	XP_025268061.1-XP_011260793.1-E2AMG4	0.00916584	0.00916584	0.00916584	0.00916584	0.00916584	0.00916584	0.00916584	0.00916584	0.00916584	0.00916584		0.00916584
89	XP_011268819.2	0.00879706	0.00879706	0.00879706	0.00879706	0.00879706	0.00879706	0.00879706	0.00879706	0.00879706	0.00879706		0.00879706
292	XP_011251246.1-E2A429-XP_011251245.1-XP_011251244.1	0.00873529	0.00873529	0.00873529	0.00873529	0.00873529	0.00873529	0.00873529	0.00873529	0.00873529	0.00873529		0.00873529
182	XP_011262389.1-E2AQV0	0.00856639	0.00856639	0.00856639	0.00856639	0.00856639	0.00856639	0.00856639	0.00856639	0.00856639	0.00856639		0.00856639
160	XP_011268535.1-E1ZZZ1	0.00844739	0.00844739	0.00844739	0.00844739	0.00844739	0.00844739	0.00844739	0.00844739	0.00844739	0.00844739		0.00844739
115	XP_011265309.2-E2AWK6	0.00804796	0.00804796	0.00804796	0.00804796	0.00804796	0.00804796	0.00804796	0.00804796	0.00804796	0.00804796		0.00804796
362	XP_011260561.2-XP_011260560.2-E2ALY1	0.00797899	0.00797899	0.00797899	0.00797899	0.00797899	0.00797899	0.00797899	0.00797899	0.00797899	0.00797899		0.00797899
359	XP_011252980.1-E2A7M9	0.00797587	0.00797587	0.00797587	0.00797587	0.00797587	0.00797587	0.00797587	0.00797587	0.00797587	0.00797587		0.00797587
128	XP_011251922.1-XP_011251921.1-E2A5G4	0.00795298	0.00795298	0.00795298	0.00795298	0.00795298	0.00795298	0.00795298	0.00795298	0.00795298	0.00795298		0.00795298
412	XP_019882578.1-XP_011253405.1-XP_011253404.1-XP_011253403.1-E2A8G5	0.00762487	0.00762487	0.00762487	0.00762487	0.00762487	0.00762487	0.00762487	0.00762487	0.00762487	0.00762487		0.00762487
199	XP_025269243.1	0.00756569	0.00756569	0.00756569	0.00756569	0.00756569	0.00756569	0.00756569	0.00756569	0.00756569	0.00756569		0.00756569
378	XP_011264067.1-XP_011264068.1-E2AUA4	0.00750168	0.00750168	0.00750168	0.00750168	0.00750168	0.00750168	0.00750168	0.00750168	0.00750168	0.00750168		0.00750168
195	XP_019884897.1-XP_011265919.1-XP_011265918.1-E2AXQ4-XP_025269153.1-XP_025269152.1	0.00732266	0.00732266	0.00732266	0.00732266	0.00732266	0.00732266	0.00732266	0.00732266	0.00732266	0.00732266		0.00732266
448	XP_025262700.1-XP_025262698.1-XP_025266100.1-XP_025262697.1-XP_025262696.1-XP_025262695.1-XP_025266099.1-E2ADX2	0.00623529	0.00623529	0.00623529	0.00623529	0.00623529	0.00623529	0.00623529	0.00623529	0.00623529	0.00623529		0.00623529
32	XP_011261399.1-E2ANT2	0.00617728	0.00617728	0.00617728	0.00617728	0.00617728	0.00617728	0.00617728	0.00617728	0.00617728	0.00617728		0.00617728
168	XP_025265142.1-XP_011265088.2-E1ZV36	0.00610684	0.00610684	0.00610684	0.00610684	0.00610684	0.00610684	0.00610684	0.00610684	0.00610684	0.00610684		0.00610684
239	XP_011261969.2-E2APZ5	0.00588725	0.00588725	0.00588725	0.00588725	0.00588725	0.00588725	0.00588725	0.00588725	0.00588725	0.00588725		0.00588725
147	XP_019884712.1-XP_011264422.1	0.005875	0.005875	0.005875	0.005875	0.005875	0.005875	0.005875	0.005875	0.005875	0.005875		0.005875
476	XP_011268699.2-XP_011268698.2-E2A097-E2A096-E2AR74-XP_025264019.1-XP_011268697.2	0.00577792	0.00577792	0.00577792	0.00577792	0.00577792	0.00577792	0.00577792	0.00577792	0.00577792	0.00577792		0.00577792
118	E2AFA5-XP_011257049.1-XP_011257048.1	0.00523595	0.00523595	0.00523595	0.00523595	0.00523595	0.00523595	0.00523595	0.00523595	0.00523595	0.00523595		0.00523595
426	XP_025270581.1-XP_011269446.2-XP_011269445.2-E2A1K5	0.00520802	0.00520802	0.00520802	0.00520802	0.00520802	0.00520802	0.00520802	0.00520802	0.00520802	0.00520802		0.00520802
399	XP_011268790.1-XP_011268795.1-XP_011268794.1-XP_011268793.1-E2A0F3-XP_011268792.1-XP_011268791.1	0.00515062	0.00515062	0.00515062	0.00515062	0.00515062	0.00515062	0.00515062	0.00515062	0.00515062	0.00515062		0.00515062
189	XP_019884913.1-XP_011266002.1-E2AY00	0.005	0.005	0.005	0.005	0.005	0.005	0.005	0.005	0.005	0.005		0.005
439	XP_011263425.1-E2ASS7	0.0047549	0.0047549	0.0047549	0.0047549	0.0047549	0.0047549	0.0047549	0.0047549	0.0047549	0.0047549		0.0047549
319	XP_011269444.1-E1ZVE4-XP_011269460.1-XP_011269452.1	0.00456618	0.00456618	0.00456618	0.00456618	0.00456618	0.00456618	0.00456618	0.00456618	0.00456618	0.00456618		0.00456618
141	XP_011255653.1-E2ACR9	0.00427528	0.00427528	0.00427528	0.00427528	0.00427528	0.00427528	0.00427528	0.00427528	0.00427528	0.00427528		0.00427528
454	XP_011258400.1-XP_011258399.1-E2AI07	0.00414259	0.00414259	0.00414259	0.00414259	0.00414259	0.00414259	0.00414259	0.00414259	0.00414259	0.00414259		0.00414259
381	XP_025268059.1-XP_025268060.1-XP_011267296.2-E2AHZ0-E2AHY9-E2B0N7-E2AHZ2-E2AHZ1	0.00413187	0.00413187	0.00413187	0.00413187	0.00413187	0.00413187	0.00413187	0.00413187	0.00413187	0.00413187		0.00413187
477	XP_011266509.1	0.00392279	0.00392279	0.00392279	0.00392279	0.00392279	0.00392279	0.00392279	0.00392279	0.00392279	0.00392279		0.00392279
271	XP_011264753.1-E2AVK0	0.0033437	0.0033437	0.0033437	0.0033437	0.0033437	0.0033437	0.0033437	0.0033437	0.0033437	0.0033437		0.0033437
416	XP_011265328.1-E2AWL6	0.00320677	0.00320677	0.00320677	0.00320677	0.00320677	0.00320677	0.00320677	0.00320677	0.00320677	0.00320677		0.00320677
58	XP_011266004.2	0.00314783	0.00314783	0.00314783	0.00314783	0.00314783	0.00314783	0.00314783	0.00314783	0.00314783	0.00314783		0.00314783
164	XP_011261637.1-E2APC4	0.00311373	0.00311373	0.00311373	0.00311373	0.00311373	0.00311373	0.00311373	0.00311373	0.00311373	0.00311373		0.00311373
41	E2AQI6-XP_011262241.1-XP_011262243.1-XP_011262250.1-XP_019884226.1-XP_011262249.1-XP_011262248.1-XP_011262247.1-XP_011262246.1-XP_011262245.1-XP_011262244.1	0	0	0	0	0	0	0	0	0	0		0
88	XP_011267538.1-E2B155	0	0	0	0	0	0	0	0	0	0		0
109	XP_025268048.1	0	0	0	0	0	0	0	0	0	0		0
114	XP_011260763.1-E2AMD6-XP_011260762.1	0	0	0	0	0	0	0	0	0	0		0
121	XP_025263040.1-XP_025263125.1-XP_025263071.1	0	0	0	0	0	0	0	0	0	0		0
127	E2A2D8	0	0	0	0	0	0	0	0	0	0		0
129	XP_019883740.2-E2AKK9	0	0	0	0	0	0	0	0	0	0		0
132	XP_025268689.1-E2A0E3-E2A0E2	0	0	0	0	0	0	0	0	0	0		0
142	XP_011266940.1-E2AZU1	0	0	0	0	0	0	0	0	0	0		0
144	XP_025265691.1-E2AD33	0	0	0	0	0	0	0	0	0	0		0
150	XP_011251814.1-E2A5A3	0	0	0	0	0	0	0	0	0	0		0
165	XP_011260686.2-E2AM68-E2AM67	0	0	0	0	0	0	0	0	0	0		0
176	XP_011262653.1-E2ARD3	0	0	0	0	0	0	0	0	0	0		0
179	E1ZXZ4-XP_011255340.2	0	0	0	0	0	0	0	0	0	0		0
180	E2ABI5	0	0	0	0	0	0	0	0	0	0		0
196	XP_011266262.1-E2AYI4	0	0	0	0	0	0	0	0	0	0		0
212	XP_011260887.1-E1ZXK2	0	0	0	0	0	0	0	0	0	0		0
215	XP_011264961.1-XP_011264960.1-E2AVX9	0	0	0	0	0	0	0	0	0	0		0
219	XP_011262740.1-XP_011262739.1-E2ARI6-XP_011261103.1-E2AN64	0	0	0	0	0	0	0	0	0	0		0
221	XP_011260804.1-E2AMH2	0	0	0	0	0	0	0	0	0	0		0
222	XP_011254975.1-E2ABH3	0	0	0	0	0	0	0	0	0	0		0
228	XP_011262285.1-E2AQK2-XP_011262284.1	0	0	0	0	0	0	0	0	0	0		0
233	XP_025264462.1-XP_025264460.1-XP_025264459.1-XP_025264457.1-XP_025264453.1-XP_025264446.1-E2AB22	0	0	0	0	0	0	0	0	0	0		0
237	XP_011255135.2-E2ABV2	0	0	0	0	0	0	0	0	0	0		0
238	E2AMQ8-XP_025265046.1	0	0	0	0	0	0	0	0	0	0		0
242	E2AGQ0	0	0	0	0	0	0	0	0	0	0		0
246	XP_011251040.1-XP_011251039.1-XP_011251038.1-E2A3S3-E2A3S0	0	0	0	0	0	0	0	0	0	0		0
253	XP_025265208.1-E2AL32	0	0	0	0	0	0	0	0	0	0		0
257	XP_011258820.1-E2AIU9	0	0	0	0	0	0	0	0	0	0		0
262	XP_025267364.1-E2AMN5-E2AMN4	0	0	0	0	0	0	0	0	0	0		0
263	XP_019884886.1-XP_011265840.1-E2AXL2	0	0	0	0	0	0	0	0	0	0		0
264	XP_011254448.1-E2AAF9	0	0	0	0	0	0	0	0	0	0		0
281	XP_011253560.1-XP_011253559.1-E2A8S5	0	0	0	0	0	0	0	0	0	0		0
284	XP_011259113.1-E2AJB5	0	0	0	0	0	0	0	0	0	0		0
289	E2ABA5-XP_025269147.1-XP_011254839.1-XP_011254838.1-XP_011254837.1	0	0	0	0	0	0	0	0	0	0		0
293	XP_019884752.1-XP_011265107.1-E2AW51-E2AW54	0	0	0	0	0	0	0	0	0	0		0
294	XP_011253803.1-E2A952	0	0	0	0	0	0	0	0	0	0		0
299	XP_011252204.1-E2A665	0	0	0	0	0	0	0	0	0	0		0
310	XP_011266198.2-E2AYC1	0	0	0	0	0	0	0	0	0	0		0
311	XP_025262168.1-XP_011254489.2-E2AAI3	0	0	0	0	0	0	0	0	0	0		0
312	XP_025265136.1	0	0	0	0	0	0	0	0	0	0		0
313	XP_011267949.1-E2B222	0	0	0	0	0	0	0	0	0	0		0
321	XP_011255834.1-XP_011255833.1-XP_011255832.1-E2AD28	0	0	0	0	0	0	0	0	0	0		0
322	XP_011259060.1-E2AJ86	0	0	0	0	0	0	0	0	0	0		0
324	XP_011266432.1-E2AYU1	0	0	0	0	0	0	0	0	0	0		0
333	XP_025267701.1-XP_025267700.1-E2AWG1	0	0	0	0	0	0	0	0	0	0		0
335	XP_011264587.1-E2AVB1	0	0	0	0	0	0	0	0	0	0		0
336	XP_025268998.1	0	0	0	0	0	0	0	0	0	0		0
338	E1ZV08-XP_025271395.1-XP_011260504.1-XP_011260421.1	0	0	0	0	0	0	0	0	0	0		0
339	E2A9I6-XP_025271362.1	0	0	0	0	0	0	0	0	0	0		0
340	E2A162-XP_011269204.1	0	0	0	0	0	0	0	0	0	0		0
344	XP_025265510.1-XP_019884763.1-XP_011265197.1-XP_011265195.1-XP_019884762.1-XP_019884761.1-XP_011265194.1-XP_011265193.1-XP_011265191.1-XP_011265190.1-XP_011265189.1-E2AWB0	0	0	0	0	0	0	0	0	0	0		0
349	XP_011264487.1-E2AV36	0	0	0	0	0	0	0	0	0	0		0
351	XP_025269390.1-XP_025269389.1-XP_025269388.1-E2AYP1-XP_025269385.1-XP_025269384.1-XP_025269383.1-XP_025269382.1-XP_025269386.1	0	0	0	0	0	0	0	0	0	0		0
352	XP_011261151.1-E2ANA8	0	0	0	0	0	0	0	0	0	0		0
355	E2AJP0-XP_025266586.1	0	0	0	0	0	0	0	0	0	0		0
360	XP_011264968.2-E2AVY1-XP_019884608.2-E2AUE2	0	0	0	0	0	0	0	0	0	0		0
361	XP_011268673.2-E2A062	0	0	0	0	0	0	0	0	0	0		0
364	E2AQ44-XP_011262046.1	0	0	0	0	0	0	0	0	0	0		0
365	E2AXN0-XP_011265873.1	0	0	0	0	0	0	0	0	0	0		0
368	E2AP51-XP_011261492.1	0	0	0	0	0	0	0	0	0	0		0
369	XP_011263368.1-E2ASR9	0	0	0	0	0	0	0	0	0	0		0
371	XP_025269141.1	0	0	0	0	0	0	0	0	0	0		0
372	XP_011261435.1-E1ZXN9	0	0	0	0	0	0	0	0	0	0		0
374	XP_011251576.1-E2A4R1	0	0	0	0	0	0	0	0	0	0		0
376	XP_011250886.1	0	0	0	0	0	0	0	0	0	0		0
380	XP_011269382.1-E2A1F7	0	0	0	0	0	0	0	0	0	0		0
382	XP_011259829.1-E2AKH8	0	0	0	0	0	0	0	0	0	0		0
383	XP_011250989.1-E2A3P2	0	0	0	0	0	0	0	0	0	0		0
387	XP_011259467.1-E2AJX9-XP_011259465.1	0	0	0	0	0	0	0	0	0	0		0
388	E2AMK3-XP_011260854.3	0	0	0	0	0	0	0	0	0	0		0
389	XP_011261781.1-XP_011261780.1-E2APK9	0	0	0	0	0	0	0	0	0	0		0
391	E2AXK1-XP_011265833.1	0	0	0	0	0	0	0	0	0	0		0
393	E2A1E3-XP_011269355.1	0	0	0	0	0	0	0	0	0	0		0
394	XP_011258245.1-E1ZX53	0	0	0	0	0	0	0	0	0	0		0
397	XP_011255877.1-E2AD64	0	0	0	0	0	0	0	0	0	0		0
398	XP_011256968.1-E2AF24	0	0	0	0	0	0	0	0	0	0		0
401	XP_025269493.1	0	0	0	0	0	0	0	0	0	0		0
402	XP_011261487.1-E2AP46	0	0	0	0	0	0	0	0	0	0		0
405	XP_011254732.1	0	0	0	0	0	0	0	0	0	0		0
407	XP_011255976.2-E2ADD9	0	0	0	0	0	0	0	0	0	0		0
409	E2AZV5-XP_025263902.1-E2A2J4	0	0	0	0	0	0	0	0	0	0		0
410	XP_011269303.2-XP_011269302.2-XP_011269301.2-XP_011269299.2	0	0	0	0	0	0	0	0	0	0		0
411	XP_011269203.1	0	0	0	0	0	0	0	0	0	0		0
414	XP_025269698.1-E2AYW7-E2AYW6	0	0	0	0	0	0	0	0	0	0		0
415	XP_025264071.1-XP_025264070.1-XP_011255071.1-E2ABP4	0	0	0	0	0	0	0	0	0	0		0
417	XP_011254475.1-E2AAH7	0	0	0	0	0	0	0	0	0	0		0
418	E1ZZJ4-XP_011268367.1-XP_025268277.1-XP_011268365.1	0	0	0	0	0	0	0	0	0	0		0
420	XP_011267555.1-E2B171-XP_011267554.1	0	0	0	0	0	0	0	0	0	0		0
421	E2AW15	0	0	0	0	0	0	0	0	0	0		0
422	XP_011251574.1-E2A4R0-XP_011251573.1	0	0	0	0	0	0	0	0	0	0		0
425	XP_011261314.1-E1ZXM8	0	0	0	0	0	0	0	0	0	0		0
428	XP_025271105.1-XP_025271104.1-XP_025271103.1	0	0	0	0	0	0	0	0	0	0		0
429	XP_025269497.1	0	0	0	0	0	0	0	0	0	0		0
430	XP_011254592.1-XP_011254591.1-XP_011254590.1-E2AAQ1	0	0	0	0	0	0	0	0	0	0		0
431	E2AVZ2-XP_025264825.1	0	0	0	0	0	0	0	0	0	0		0
432	XP_011260463.1-E2ALK0	0	0	0	0	0	0	0	0	0	0		0
434	XP_019883158.1-E1ZWT7	0	0	0	0	0	0	0	0	0	0		0
435	E2AX13	0	0	0	0	0	0	0	0	0	0		0
436	XP_019885551.1-E2A1P1	0	0	0	0	0	0	0	0	0	0		0
437	XP_011265325.1-XP_011265324.1-E2AWL4	0	0	0	0	0	0	0	0	0	0		0
438	XP_011255975.2-XP_011255974.2-E2ADE0	0	0	0	0	0	0	0	0	0	0		0
440	E2A0Q8-XP_011268952.1	0	0	0	0	0	0	0	0	0	0		0
441	XP_025263257.1-E2AKU5-E2AKU6	0	0	0	0	0	0	0	0	0	0		0
442	XP_025270242.1-XP_011266579.1-XP_011266577.1-XP_011266576.1-XP_011266574.1-XP_011266573.1-E2AZ31-XP_025270240.1-XP_011266571.1	0	0	0	0	0	0	0	0	0	0		0
444	XP_011253558.1-E2A8S3	0	0	0	0	0	0	0	0	0	0		0
445	XP_011268281.2-E1ZZG1	0	0	0	0	0	0	0	0	0	0		0
447	XP_019882165.2-XP_019882163.2-XP_019882164.2-XP_011251397.2-E2A4D2-XP_011251398.2	0	0	0	0	0	0	0	0	0	0		0
449	XP_025269140.1	0	0	0	0	0	0	0	0	0	0		0
450	XP_011268143.2-E1ZZ63-XP_011268142.2-XP_011268139.2-E1ZZ67-E1ZZ66-XP_011268140.1-XP_011268141.1-E1ZZ65	0	0	0	0	0	0	0	0	0	0		0
451	E2AEX0-XP_011256903.1-XP_011256902.1-XP_011256901.1-XP_025267590.1-XP_025267589.1-XP_025267588.1	0	0	0	0	0	0	0	0	0	0		0
452	XP_011264203.1-E2AUL5	0	0	0	0	0	0	0	0	0	0		0
456	XP_011254364.2-E2AAA4	0	0	0	0	0	0	0	0	0	0		0
457	XP_025269261.1-XP_025269260.1-E2AWP0-E2AUY7	0	0	0	0	0	0	0	0	0	0		0
458	XP_025267422.1-XP_011268639.1-XP_011268638.1-XP_011268637.1-XP_011268636.1-XP_011268635.1-E2A040	0	0	0	0	0	0	0	0	0	0		0
460	XP_011255068.1-XP_011255058.1-E1ZWI0	0	0	0	0	0	0	0	0	0	0		0
462	XP_011262105.1-E2AQ84	0	0	0	0	0	0	0	0	0	0		0
463	E2AF09-XP_011256937.1	0	0	0	0	0	0	0	0	0	0		0
464	XP_011264128.1-E2AUD9-XP_011264127.1	0	0	0	0	0	0	0	0	0	0		0
465	XP_011264253.1-XP_011264252.1-XP_011264250.1-XP_011264249.1-E2AUK5	0	0	0	0	0	0	0	0	0	0		0
466	XP_011265518.2-E2AX17	0	0	0	0	0	0	0	0	0	0		0
467	XP_011263009.1-E2AS00	0	0	0	0	0	0	0	0	0	0		0
468	XP_025268062.1-XP_011263604.1-XP_011263603.1-XP_011263602.1-E2ATA4	0	0	0	0	0	0	0	0	0	0		0
469	XP_025268731.1-XP_025270891.1-XP_025265358.1	0	0	0	0	0	0	0	0	0	0		0
470	E2AB34-XP_011254761.1-XP_011254760.1-XP_011254759.1	0	0	0	0	0	0	0	0	0	0		0
471	XP_011262896.1-E2ART6	0	0	0	0	0	0	0	0	0	0		0
472	E2ATZ6-XP_025266208.1	0	0	0	0	0	0	0	0	0	0		0
473	XP_019883837.1-E2ALL5	0	0	0	0	0	0	0	0	0	0		0
474	XP_011252120.1-XP_011252111.1-E1ZVU8	0	0	0	0	0	0	0	0	0	0		0
475	XP_011255161.1-XP_011255160.1-E2ABW5	0	0	0	0	0	0	0	0	0	0		0
478	XP_011263180.1-XP_011263173.1-E1ZY18	0	0	0	0	0	0	0	0	0	0		0
479	XP_011265593.1-XP_011265592.1-E2AX30	0	0	0	0	0	0	0	0	0	0		0
480	XP_025262732.1-XP_025262731.1-E2ATE8-E2ATE6-REV__E2ACI4-REV__XP_011255486.1	0	0	0	0	0	0	0	0	0	0		0
481	XP_011253128.1-E2A7Y2	0	0	0	0	0	0	0	0	0	0		0
482	XP_011254292.1-E2AA51	0	0	0	0	0	0	0	0	0	0		0
483	E2AD19-XP_011255813.2-XP_025265625.1	0	0	0	0	0	0	0	0	0	0		0
484	XP_019882541.1-E2A827	0	0	0	0	0	0	0	0	0	0		0
485	E2AP99-XP_011261605.2	0	0	0	0	0	0	0	0	0	0		0
487	XP_011252069.2-E2A5S9-E2A5S6	0	0	0	0	0	0	0	0	0	0		0
488	E2A9H0-XP_025268177.1-XP_025268171.1	0	0	0	0	0	0	0	0	0	0		0
489	XP_011254690.1-XP_011254689.1-XP_011254688.1-XP_011254687.1-E2AAW9-XP_025271158.1	0	0	0	0	0	0	0	0	0	0		0
490	XP_011259910.2-E2AKQ7	0	0	0	0	0	0	0	0	0	0		0
491	XP_025269281.1	0	0	0	0	0	0	0	0	0	0		0
492	XP_011258637.1-E2AIH6	0	0	0	0	0	0	0	0	0	0		0
493	XP_025270484.1-XP_011267484.1	0	0	0	0	0	0	0	0	0	0		0
494	E2AY08-XP_025269779.1	0	0	0	0	0	0	0	0	0	0		0
495	E2A4H1-XP_025265505.1	0	0	0	0	0	0	0	0	0	0		0
496	E2A6H4	0	0	0	0	0	0	0	0	0	0		0
497	XP_011259014.1-E2AJ62	0	0	0	0	0	0	0	0	0	0		0
498	XP_011265549.1-E2AX72	0	0	0	0	0	0	0	0	0	0		0
499	XP_025264561.1-XP_025264562.1	0	0	0	0	0	0	0	0	0	0		0
500	E1ZYX6-XP_025268105.1-XP_011267329.1-XP_019884989.1-XP_019884987.1	0	0	0	0	0	0	0	0	0	0		0
501	XP_011269826.1-E2A2D3-XP_011269825.1-XP_011269824.1	0	0	0	0	0	0	0	0	0	0		0
502	E2AMU0-XP_011260960.1-XP_011260959.1	0	0	0	0	0	0	0	0	0	0		0
503	XP_011259539.1-E2AK02	0	0	0	0	0	0	0	0	0	0		0
504	XP_011269400.1-E2A1H1	0	0	0	0	0	0	0	0	0	0		0
505	XP_011251816.2-E2A5A6	0	0	0	0	0	0	0	0	0	0		0
506	XP_011263221.1	0	0	0	0	0	0	0	0	0	0		0
507	XP_011264788.2-XP_025265583.1-XP_019884711.1-XP_011264789.1-XP_019884710.1-XP_011264791.1-XP_011264783.2-XP_011264786.1-XP_011264785.1-E2AVQ2-XP_011264782.1	0	0	0	0	0	0	0	0	0	0		0
508	XP_011262424.1-E2AQY5	0	0	0	0	0	0	0	0	0	0		0
509	XP_011256604.1-E2AEC2	0	0	0	0	0	0	0	0	0	0		0
510	XP_025271294.1	0	0	0	0	0	0	0	0	0	0		0
511	XP_025266938.1-XP_025266937.1	0	0	0	0	0	0	0	0	0	0		0
512	XP_025263893.1-XP_011264552.1-E2AV98	0	0	0	0	0	0	0	0	0	0		0
513	XP_011265967.1-E2AXV8	0	0	0	0	0	0	0	0	0	0		0
514	XP_025267687.1-E2AWE3	0	0	0	0	0	0	0	0	0	0		0
515	XP_025268117.1	0	0	0	0	0	0	0	0	0	0		0
516	E2A701	0	0	0	0	0	0	0	0	0	0		0
517	XP_019885069.1-E2AZP4-E2AZP6	0	0	0	0	0	0	0	0	0	0		0
518	XP_011254794.1	0	0	0	0	0	0	0	0	0	0		0
